# Supplementary material for: EPB41L4A-AS1 long noncoding RNA acts in both cis- and trans-acting transcriptional regulation and controls nucleolar biology
Source: bioRxiv preprint, doi:10.1101/2025.04.08.647803, version 3 (2025-11-16)
Supplement: Table S1 [file 647803_file03.xlsx]

## Sheet: Sheet1
tgSymbol	tgEnsembl	tgExons	tgStrand	tgStart	tgEnd	tgLogFC	tgFraction	biotype	ghChr	ghStart	ghEnd	lincChr	lincGene	lincStart	lincEnd	lincStrand	lincFraction	lincLogFC	lincExons	GHid	combined_score	linc_tg_biotype	tgTSS	lincTSS	Distance	Pair
CYB561	ENSG00000008283	6	-	61509665	61523739	0.63	Nu,Cy	protein_coding	chr17	61537162	61540561	chr17	LncRNA584	61536712	61538061	+	Ch,Nu,Cy	3.646	1	GH17J063460	18.3206	Antisense	61523739	61536712	-12973	LncRNA584-CYB561
CYP24A1	ENSG00000019186	12	-	52769988	52790512	5.206	Ch,Nu,Cy	protein_coding	chr20	5276474052763140	5276673952763340	chr20	LncRNA1711	52762260	52765553	-	Ch,Nu,Cy	3.14	1	GH20J054148,GH20J054146	12.2913802329975,11.545126370401	Sense	52790512	52765553	24959	LncRNA1711-CYP24A1
HOXC8	ENSG00000037965	2	+	54402832	54407570	1.777	Ch,Nu,Cy,Tam,Ful,JQ1	protein_coding	chr12	5436560554365600	5442858654428580	chr12	ENSG00000260597	54413694	54416373	+	Ch,Cy,JQ1	1.205	1	GH12J053971,GH12J053971	618.486824350139,618.486824350139	Sense	54402832	54413694	-10862	ENSG00000260597-HOXC8
TRAM2	ENSG00000065308	11	-	52362200	52441713	-0.074	Ch,Nu,Tam,Ful,JQ1	protein_coding	chr6	5242879152428790	5244324252443240	chr6	ENSG00000225791	52442105	52448791	+	Ch,JQ1	-0.76	4	GH06J052563,GH06J052563	603.57301706792,603.57301706792	Antisense	52441713	52442105	-392	ENSG00000225791-TRAM2
SDK2	ENSG00000069188	45	-	71330523	71640228	2.95	Ch,Nu,Cy	protein_coding	chr17	71636601	71642339	chr17	LncRNA589	71641488	71642666	+	Ch,Nu,Cy	3.074	1	GH17J073642	619.347	Antisense	71640228	71641488	-1260	LncRNA589-SDK2
CA12	ENSG00000074410	11	-	63613577	63674360	1.208	Ch,Nu,Cy,Tam,Ful,JQ1	protein_coding	chr15	6.36909e+143	6.3692e+143	chr15	ENSG00000259459	63682335	63730519	+	Ch,Nu,Cy,Tam,Ful,JQ1	1.276	7	GH15J063398,GH15J063435,GH15J063407,GH15J063434,GH15J063431,GH15J063395,GH15J063414,GH15J063420,GH15J063402,GH15J063407,GH15J063395,GH15J063420,GH15J063431,GH15J063434,GH15J063435,GH15J063398,GH15J063402,GH15J063414	33.1914998303873,10.9510931688107,31.1768481017857,10.5372211281272,15.8400058856371,31.3904298313187,27.5003229412972,11.6668559316672,33.8155297279552,31.1768481017857,31.3904298313187,11.6668559316672,15.8400058856371,10.5372211281272,10.9510931688107,33.1914998303873,33.8155297279552,27.5003229412972	Antisense	63674360	63682335	-7975	ENSG00000259459-CA12
SLC25A43	ENSG00000077713	6	+	118533023	118588441	0.627	Ch,Nu	protein_coding	chrX	1.18452e+26	1.18452e+26	chrX	ENSG00000230392	118425492	118469573	+	Ch,Nu,Cy	4.374	4	GH0XJ119317,GH0XJ119324,GH0XJ119295	11.228993879869,11.9109480345587,11.5814043811124	Sense	118533023	118425492	107531	ENSG00000230392-SLC25A43
GRHL2	ENSG00000083307	16	+	102504660	102681954	1.438	Ch,Nu,Cy	protein_coding	chr8	1.02326e+17	1.02327e+17	chr8	LncRNA1317	102326256	102326539	+	Ch,Nu,Cy	1.378	5	GH08J101314,GH08J101318	9.86051501297783,10.5134497403101	Sense	102504660	102326256	178404	LncRNA1317-GRHL2
SLC25A24	ENSG00000085491	10	-	108676658	108743471	1.566	Ch,Nu,Cy	protein_coding	chr1	108669023	108670422	chr1	LncRNA1510	108665854	108670705	-	Ch,Nu,Cy	2.26	1	GH01J108127	14.3205	Sense	108743471	108670705	72766	LncRNA1510-SLC25A24
CDC6	ENSG00000094804	12	+	38443885	38459171	0.41	Ch,Nu,Cy,Ful,JQ1	protein_coding	chr17	3.86121e+31	3.86216e+31	chr17	LncRNA1630	38618212	38620215	+	Ch,Nu,Cy,Ful	1.559	1	GH17J040455,GH17J040455,GH17J040455,GH17J040455	14.7604329392177,14.7604329392177,14.7604329392177,14.7604329392177	Sense	38443885	38618212	-174327	LncRNA1630-CDC6
EFHC1	ENSG00000096093	13	+	52285106	52387892	-0.774	Ch	protein_coding	chr6	52428791	52443242	chr6	ENSG00000225791	52442105	52448791	+	Ch	-0.783	4	GH06J052563	21.2495	Sense	52285106	52442105	-156999	ENSG00000225791-EFHC1
LRP5L	ENSG00000100068	7	-	25747385	25801344	1.28	Ch,Nu,Cy	protein_coding	chr22	25742969	25744966	chr22	LncRNA935	25738850	25744586	-	Ch,Nu	0.793	1	GH22J025348	6.79824	Sense	25801344	25744586	56758	LncRNA935-LRP5L
UBE2I	ENSG00000103275	8	+	1355548	1377019	0.596	Ch	protein_coding	chr16	1339601	1340002	chr16	LncRNA485	1339492	1340971	+	Ch,Nu,Cy	5.468	1	GH16J001289	10.6355	Sense	1355548	1339492	16056	LncRNA485-UBE2I
GATA3	ENSG00000107485	6	+	8095567	8117161	-1.609	Nu,Cy	protein_coding	chr10	8090701	8107026	chr10	ENSG00000197308	8092413	8095447	-	Nu	-1.191	3	GH10J008051	605.867	Antisense	8095567	8095447	120	ENSG00000197308-GATA3
ID2	ENSG00000115738	5	+	8818975	8824583	-1.409	Ch,Nu,Cy,Tam,Ful	protein_coding	chr2	8.7208e+69	8.721e+69	chr2	ENSG00000236008	8699963	8723922	-	Nu,Tam	-0.029	6	GH02J008580,GH02J008582,GH02J008571,GH02J008578,GH02J008576,GH02J008571,GH02J008578,GH02J008580,GH02J008582,GH02J008576	12.0393470910291,12.0393470910291,12.0877931836736,12.0934832178471,12.0934832178471,12.0877931836736,12.0934832178471,12.0393470910291,12.0393470910291,12.0934832178471	Antisense	8818975	8723922	95053	ENSG00000236008-ID2
OGFRL1	ENSG00000119900	7	+	71998506	72018653	-0.196	Nu,Cy,Tam,Ful,JQ1	protein_coding	chr6	7.21277e+79	7.21315e+79	chr6	ENSG00000233237	72054047	72130472	-	Ch,Nu,Cy,JQ1	-0.204	5	GH06J071418,GH06J071347,GH06J071365,GH06J071350,GH06J071351,GH06J071347,GH06J071418,GH06J071365,GH06J071350,GH06J071351	9.48699398863463,16.805701450315,10.6639665783369,16.2610264274744,16.172372092716,16.805701450315,9.48699398863463,10.6639665783369,16.2610264274744,16.172372092716	Antisense	71998506	72130472	-131966	ENSG00000233237-OGFRL1
HOXC11	ENSG00000123388	2	+	54366910	54371427	-0.589	Nu,Cy,JQ1	protein_coding	chr12	5436560554365600	5442858654428580	chr12	ENSG00000260597	54413694	54416373	+	Ch,Cy,JQ1	1.205	1	GH12J053971,GH12J053971	609.806910222442,609.806910222442	Sense	54366910	54413694	-46784	ENSG00000260597-HOXC11
TRERF1	ENSG00000124496	18	-	42192669	42419789	-0.928	Ch,Nu,Cy,Tam,Ful,JQ1	protein_coding	chr6	4241624042416240	4242273942422730	chr6	LncRNA1794	42420928	42425310	+	Ch,Nu,JQ1	-1.389	1	GH06J042448,GH06J042448	606.21489928856,606.21489928856	Antisense	42419789	42420928	-1139	LncRNA1794-TRERF1
ATXN1	ENSG00000124788	9	-	16299343	16761722	-1.18	Ch,Nu,Cy	protein_coding	chr6	16758231	16772273	chr6	ENSG00000272341	16764577	16767114	+	Ch,Nu,Cy	-1.953	1	GH06J016758	609.165	Antisense	16761722	16764577	-2855	ENSG00000272341-ATXN1
NUP153	ENSG00000124789	23	-	17615269	17706656	0.679	Ch,Nu,Cy	protein_coding	chr6	16758231	16772273	chr6	ENSG00000272341	16764577	16767114	+	Ch,Nu,Cy	-1.953	1	GH06J016758	48.5663	Antisense	17706656	16764577	942079	ENSG00000272341-NUP153
SOX9	ENSG00000125398	3	+	70117161	70122561	-0.583	Cy	protein_coding	chr17	7.03815e+47	7.03921e+47	chr17	ENSG00000227036	70319264	70636611	-	Ch,Nu,Cy	3.841	5	GH17J072385,GH17J072398,GH17J072418,GH17J072415,GH17J072501,GH17J072444	4.99756840208894,1.95629385329135,6.74129810404982,1.30140665076213,1.81203415561304,2.28161931941388	Antisense	70117161	70636611	-519450	ENSG00000227036-SOX9
A4GALT	ENSG00000128274	2	-	43088127	43117304	0.687	Ch,Nu,Cy,Tam,Ful,JQ1,Nutlin	protein_coding	chr22	4.30816e+47	4.30865e+47	chr22	LncRNA1741	43077894	43082415	-	Ch,Nu,Cy,Ful,Nutlin-3	1.102	1	GH22J042685,GH22J042681,GH22J042681,GH22J042685,GH22J042685,GH22J042681	14.121447218312,24.2624622565561,24.2624622565561,14.121447218312,14.121447218312,24.2624622565561	Sense	43117304	43082415	34889	LncRNA1741-A4GALT
EPB41L4A	ENSG00000129595	23	-	111478138	111755013	-0.736	Ch,Nu,Cy	protein_coding	chr5	111495801	111498654	chr5	ENSG00000224032	111496223	111499973	+	Ch,Nu	0.832	3	GH05J112160	8.03761	Antisense	111755013	111496223	258790	ENSG00000224032-EPB41L4A
NAV1	ENSG00000134369	30	+	201592411	201796102	-0.744	Ch,Nu,Cy,JQ1	protein_coding	chr1	2.01499e+107	2.01503e+107	chr1	ENSG00000223396	201487831	201499602	+	Ch,JQ1	-1.284	2	GH01J201530,GH01J201523,GH01J201517,GH01J201525,GH01J201528,GH01J201529,GH01J201517,GH01J201523,GH01J201525,GH01J201528,GH01J201530,GH01J201529	40.4743444568802,20.0566698998571,41.5761119024872,41.7656107226962,40.8334192534779,10.5861612497281,41.5761119024872,20.0566698998571,41.7656107226962,40.8334192534779,40.4743444568802,10.5861612497281	Sense	201592411	201487831	104580	ENSG00000223396-NAV1
HNRNPA1	ENSG00000135486	11	+	54673977	54680872	-0.061	Nu,JQ1	protein_coding	chr12	5436560554365600	5442858654428580	chr12	ENSG00000260597	54413694	54416373	+	Ch,Cy,JQ1	1.205	1	GH12J053971,GH12J053971	89.3474980366899,89.3474980366899	Sense	54673977	54413694	260283	ENSG00000260597-HNRNPA1
VEZF1	ENSG00000136451	6	-	56048910	56065620	0.033	Ch,Nu,Ful,JQ1	protein_coding	chr17	5.60708e+47	5.6072e+47	chr17	ENSG00000264112	56066400	56072211	-	Ch,Nu,JQ1	0.942	2	GH17J057994,GH17J057995,GH17J057982,GH17J057982,GH17J057994,GH17J057995	14.8794073719779,11.7055936488266,605.417814876895,605.417814876895,14.8794073719779,11.7055936488266	Sense	56065620	56072211	-6591	ENSG00000264112-VEZF1
MYC	ENSG00000136997	3	+	128747680	128753674	-0.42	Ch,Nu,Cy,Tam,Ful,JQ1,Nutlin	protein_coding	chr8	128825576,128875489,128908081,128978473,128985243,128898890,128971757,128834093,128838313,128811309,128900605,128828323,128818800,128805646,128937031,129054081,128934695,128935511,128978473,129054081,128937031,128935511,128985243,128908081,128900605,128898890,128805646,128971757,128834093,128934695,128818800,128811309,128828323,128838313,128875489,128825576,128805646,128811309,128818800,128825576…	128827390,128885666,128913986,128985063,128994772,128899828,128973998,128836729,128840651,128816439,128905498,128833598,128825280,128810847,128944862,129054944,128935128,128936592,128985063,129054944,128944862,128936592,128994772,128913986,128905498,128899828,128810847,128973998,128836729,128935128,128825280,128816439,128833598,128840651,128885666,128827390,128810847,128816439,128825280,128827390…	chr8	ENSG00000249859	128806779	129113499	+	Ch,Nu,Cy,Tam,Ful,JQ1,Nutlin-3	0.451	8	GH08J127813,GH08J127863,GH08J127895,GH08J127966,GH08J127972,GH08J127886,GH08J127959,GH08J127821,GH08J127826,GH08J127799,GH08J127888,GH08J127816,GH08J127806,GH08J127793,GH08J127924,GH08J128041,GH08J127922,GH08J127923,GH08J127966,GH08J128041,GH08J127924,GH08J127923,GH08J127972,GH08J127895,GH08J127888,GH08J127886,GH08J127793,GH08J127959,GH08J127821,GH08J127922,GH08J127806,GH08J127799,GH08J127816,GH0…	5.60974038555631,11.0299468962899,13.2432352132699,9.95236974837085,9.95005158630018,10.2255474148613,1.40114223652492,5.6836520888029,5.69281832193549,11.4686843509911,10.2207354723813,5.75353110882488,13.913013546065,10.5779641810987,10.1596073503322,9.99814661777143,10.1618201413996,10.1618201413996,9.95236974837085,9.99814661777143,10.1596073503322,10.1618201413996,9.95005158630018,13.2432352…	Sense	128747680	128806779	-59099	ENSG00000249859-MYC
ARHGEF39	ENSG00000137135	12	-	35658872	35675863	-0.693	Cy	protein_coding	chr9	35656028	35665998	chr9	ENSG00000269900	35657748	35658015	-	Cy	-5.102	1	GH09J035656	617.585	Sense	35675863	35658015	17848	ENSG00000269900-ARHGEF39
NARS2	ENSG00000137513	14	-	78147007	78285919	0.767	Ch,Nu	protein_coding	chr11	7813484678140320	7813973278141520	chr11	ENSG00000251323	78135028	78140882	-	Ch	1.23	4	GH11J078423,GH11J078429	15.818221233263,17.901704700958	Sense	78285919	78140882	145037	ENSG00000251323-NARS2
TLE3	ENSG00000140332	20	-	70340129	70390515	0.54	Ch,Nu,Cy	protein_coding	chr15	6.98275e+23	6.98299e+23	chr15	ENSG00000245750	69755365	69863779	+	Ch,Nu,Cy	-1.157	6	GH15J069535,GH15J069531,GH15J069533	10.4229430943817,10.4241021754171,10.4229430943817	Antisense	70390515	69755365	635150	ENSG00000245750-TLE3
IGFBP4	ENSG00000141753	4	+	38599702	38613983	3.036	Ch,Nu,Cy	protein_coding	chr17	3861214638612140	3862158538621580	chr17	LncRNA1630	38618212	38620215	+	Ch,Nu,Cy	4.722	1	GH17J040455,GH17J040455	2.06398045675869,2.06398045675869	Sense	38599702	38618212	-18510	LncRNA1630-IGFBP4
MBOAT2	ENSG00000143797	13	-	8992820	9143942	-0.6	Ch,Nu,Tam,Ful	protein_coding	chr2	92453309245330	92493289249328	chr2	ENSG00000261104	9246722	9249994	+	Ch,Nu,JQ1	-2.022	1	GH02J009105,GH02J009105	10.263801299008,10.263801299008	Antisense	9143942	9246722	-102780	ENSG00000261104-MBOAT2
SYTL5	ENSG00000147041	17	+	37865835	37988072	0.644	Ch,Nu,Cy,Tam,Ful,JQ1	protein_coding	chrX	3776409537764090	3776605337766050	chrX	ENSG00000259977	37765400	37808658	+	Ch,Nu,Cy,Ful,JQ1	1.658	3	GH0XJ037904,GH0XJ037904	600.372170383345,600.372170383345	Sense	37865835	37765400	100435	ENSG00000259977-SYTL5
ST8SIA6	ENSG00000148488	8	-	17360382	17496329	1.111	Ch,Nu,Cy,Ful,JQ1	protein_coding	chr10	1749316617493160	1749786117497860	chr10	LncRNA158	17496438	17497814	+	Ch,Nu,Cy,Ful,JQ1	0.533	1	GH10J017451,GH10J017451	608.479028231565,608.479028231565	Antisense	17496329	17496438	-109	LncRNA158-ST8SIA6
RGS10	ENSG00000148908	5	-	121259340	121302220	0.587	Ch,Nu,Cy,Ful	protein_coding	chr10	1.21352e+17	1.21358e+17	chr10	LncRNA1526	121356886	121360342	+	Nu,Cy,JQ1	0.318	1	GH10J119592,GH10J119592	15.687711937344,15.687711937344	Antisense	121302220	121356886	-54666	LncRNA1526-RGS10
CSRP1	ENSG00000159176	7	-	201452658	201478584	-0.205	Ch,Nu,Ful	protein_coding	chr1	2.01499e+35	2.01499e+35	chr1	ENSG00000223396	201487831	201499602	+	Ch,JQ1	-1.284	2	GH01J201529,GH01J201530,GH01J201530,GH01J201529	12.0964828954081,12.0964828954081,12.0964828954081,12.0964828954081	Antisense	201478584	201487831	-9247	ENSG00000223396-CSRP1
HK2	ENSG00000159399	18	+	75061108	75120486	0.201	Ch,Nu,Cy,Ful,JQ1	protein_coding	chr2	7505866975058660	7506572875065720	chr2	ENSG00000272711	75059782	75061114	-	Cy,Tam,Ful,JQ1	0.168	1	GH02J074831,GH02J074831	615.018354338007,615.018354338007	Antisense	75061108	75061114	-6	ENSG00000272711-HK2
ZNF496	ENSG00000162714	9	-	247460714	247495148	0.1	Cy,JQ1	protein_coding	chr1	2.47494e+17	2.47497e+17	chr1	LncRNA92	247495345	247497989	+	Nu,Cy,Tam,Ful,JQ1	0.046	1	GH01J247330,GH01J247330	646.153020709347,646.153020709347	Antisense	247495148	247495345	-197	LncRNA92-ZNF496
FCRLB	ENSG00000162746	8	+	161691353	161697933	1.22	Ch,Nu,Cy,Ful,JQ1	protein_coding	chr1	1.61699e+35	1.61701e+35	chr1	LncRNA69	161699937	161701570	+	Ch,Nu,Cy,JQ1	0.47	1	GH01J161729,GH01J161733,GH01J161733,GH01J161729	12.0722545002241,10.9733204623411,10.9733204623411,12.0722545002241	Sense	161691353	161699937	-8584	LncRNA69-FCRLB
CLASP2	ENSG00000163539	40	-	33537737	33759848	0.54	Ch,Nu,Cy	protein_coding	chr3	33837400	33837658	chr3	ENSG00000271643	33837180	33838442	-	Ch,Nu,Cy	1.412	1	GH03J033795	3.779	Sense	33759848	33838442	-78594	ENSG00000271643-CLASP2
NIPBL	ENSG00000164190	47	+	36876861	37066515	0.373	Ch,JQ1	protein_coding	chr5	3.68727e+31	3.68735e+31	chr5	LncRNA1118	36870211	36876775	-	Ch,Nu,Cy,Ful	0.201	1	GH05J036872,GH05J036873,GH05J036873,GH05J036872	15.849826226357,637.500461855702,637.500461855702,15.849826226357	Antisense	36876861	36876775	86	LncRNA1118-NIPBL
KCNK5	ENSG00000164626	5	-	39156749	39197226	2.449	Ch,Nu,Cy	protein_coding	chr6	39151577	39158413	chr6	LncRNA1801	39151701	39154463	-	Ch,Nu	2.807	1	GH06J039183	18.3484	Sense	39197226	39154463	42763	LncRNA1801-KCNK5
KRT80	ENSG00000167767	9	-	52562780	52585784	-1.011	Ch,Nu,Cy,Tam,Ful,JQ1	protein_coding	chr12	5.2555e+87	5.25629e+87	chr12	ENSG00000258279	52557899	52617588	+	Ch,JQ1	-3.565	5	GH12J052163,GH12J052196,GH12J052180,GH12J052170,GH12J052221,GH12J052221,GH12J052180,GH12J052196,GH12J052196,GH12J052170,GH12J052163	13.1558333733154,7.53079026249098,627.265671114868,13.1840376785085,11.4429325007008,11.4429325007008,627.265671114868,7.53079026249098,7.53079026249098,13.1840376785085,13.1558333733154	Antisense	52585784	52557899	27885	ENSG00000258279-KRT80
SRRM2	ENSG00000167978	15	+	2802330	2822539	0.437	Nu,JQ1	protein_coding	chr16	30534023053402	30620333062033	chr16	ENSG00000272079	3056121	3057389	+	Ch,Ful,JQ1	-0.157	1	GH16J003003,GH16J003003	31.2028629541878,31.2028629541878	Sense	2802330	3056121	-253791	ENSG00000272079-SRRM2
E2F6	ENSG00000169016	9	-	11584501	11606297	1.243	Ch,Nu,Cy	protein_coding	chr2	11573728	11574926	chr2	LncRNA725	11571482	11578490	+	Ch,Nu,Cy	3.571	1	GH02J011433	5.99094	Antisense	11606297	11571482	34815	LncRNA725-E2F6
SH3TC2	ENSG00000169247	20	-	148303202	148442726	-1.78	Nu,JQ1	protein_coding	chr5	1.48504e+17	1.48511e+17	chr5	LncRNA1104	148504927	148505384	+	Nu,Ful,JQ1	-1.55	3	GH05J149124,GH05J149124	623.424705121041,623.424705121041	Antisense	148442726	148504927	-62201	LncRNA1104-SH3TC2
SLC30A1	ENSG00000170385	2	-	211744910	211752084	0.653	Ch,Nu,Cy,JQ1	protein_coding	chr1	2.11747e+17	2.11756e+17	chr1	LncRNA83	211753010	211754652	+	Nu,Cy,Ful,JQ1	0.112	1	GH01J211573,GH01J211573	600.665628627291,600.665628627291	Antisense	211752084	211753010	-926	LncRNA83-SLC30A1
P2RY6	ENSG00000171631	4	+	72975550	73009662	-1.157	Ch,Nu,Cy	protein_coding	chr11	7.29636e+47	7.29643e+47	chr11	LncRNA1546	72963532	72967779	+	Ch,Nu,Cy	3.52	1	GH11J073252,GH11J073255,GH11J073259,GH11J073260,GH11J073255,GH11J073248	7.34293281625596,6.70403756148557,6.77119950442466,7.01970946355832,6.70403756148557,6.43047364489311	Sense	72975550	72963532	12018	LncRNA1546-P2RY6
ZNF217	ENSG00000171940	6	-	52183604	52226446	-0.241	Ch,Nu,Cy,Ful	protein_coding	chr20	5.23505e+31	5.23589e+31	chr20	LncRNA852	52355187	52355397	+	Ch,Nu,Cy,Ful,JQ1	-0.194	2	GH20J053733,GH20J053862,GH20J053733,GH20J053862	6.0290426626756,1.33088227282759,6.0290426626756,1.33088227282759	Antisense	52226446	52355187	-128741	LncRNA852-ZNF217
ARNT2	ENSG00000172379	20	+	80696692	80890278	-1.048	Ch,Nu,Cy	protein_coding	chr15	8.06952e+39	8.06956e+39	chr15	ENSG00000259495	80637195	80695917	-	Ch	-2.81	3	GH15J080402,GH15J080380,GH15J080395,GH15J080403,GH15J080385	600.665628627291,11.34056402969,11.1669382085228,621.488148791487,6.27661400211003	Antisense	80696692	80695917	775	ENSG00000259495-ARNT2
HOXC5	ENSG00000172789	2	+	54426637	54429142	3.87	Ch,Nu,Cy	protein_coding	chr12	5.44711e+71	5.44721e+71	chr12	ENSG00000248265	54452038	54516018	+	Ch,Nu,Cy	2.931	2	GH12J054077,GH12J054075,GH12J054067,GH12J054076,GH12J054079,GH12J054079,GH12J054070,GH12J054061,GH12J053971	11.5088329809047,11.5276592668119,11.4515028212823,11.5276592668119,10.6837679938117,10.6837679938117,11.5276592668119,11.5102616169538,602.909665951227	Sense	54426637	54452038	-25401	ENSG00000248265-HOXC5
ABLIM3	ENSG00000173210	24	+	148521046	148640105	-0.452	Ch,Tam,Ful,JQ1	protein_coding	chr5	1.48504e+17	1.48511e+17	chr5	LncRNA1104	148504927	148505384	+	Nu,Ful,JQ1	-1.55	3	GH05J149124,GH05J149124	5.77445247993746,5.77445247993746	Sense	148521046	148504927	16119	LncRNA1104-ABLIM3
BAIAP2	ENSG00000175866	16	+	79008948	79091232	0.018	Cy,Ful,JQ1	protein_coding	chr17	7900680079006800	7902032479020320	chr17	ENSG00000226137	79002930	79008681	-	Ch,Nu,Cy,Tam,Ful,JQ1	-0.5	2	GH17J081033,GH17J081033	610.16400725801,610.16400725801	Antisense	79008948	79008681	267	ENSG00000226137-BAIAP2
IRX5	ENSG00000176842	4	+	54964774	54968397	-0.163	Ch,Nu,Cy,JQ1	protein_coding	chr16	5495911254959110	5497331254973310	chr16	ENSG00000245694	54879101	54963101	-	Ch,Nu,JQ1	-0.505	6	GH16J054926,GH16J054926	600.665628627291,600.665628627291	Antisense	54964774	54963101	1673	ENSG00000245694-IRX5
PAWR	ENSG00000177425	7	-	79968759	80084877	-0.708	Ch,Nu,Cy	protein_coding	chr12	7.98058e+39	7.98062e+39	chr12	ENSG00000257894	79734985	79897176	-	Cy	-0.719	2	GH12J079412,GH12J079367,GH12J079407,GH12J079366,GH12J079406	9.85803552377903,6.00230753578947,11.2520982180111,5.70639999859095,9.85585785637931	Sense	80084877	79897176	187701	ENSG00000257894-PAWR
ALS2CL	ENSG00000178038	26	-	46710487	46735194	1.312	Ch,Nu,Cy,Nutlin	protein_coding	chr3	4668786946687860	4668894146688940	chr3	LncRNA231	46686311	46688762	-	Ch,Nu,Cy,Nutlin-3	2.174	4	GH03J046646,GH03J046646	4.83831157757178,4.83831157757178	Sense	46735194	46688762	46432	LncRNA231-ALS2CL
LACC1	ENSG00000179630	7	+	44453420	44468068	-0.222	Cy,JQ1	protein_coding	chr13	4448633744486330	4448673644486730	chr13	ENSG00000233725	44482805	44604597	+	Nu,Cy,JQ1	-4.344	5	GH13J043912,GH13J043912	34.0775001829976,34.0775001829976	Sense	44453420	44482805	-29385	ENSG00000233725-LACC1
NRIP1	ENSG00000180530	5	-	16333556	16437321	2.333	Ch,Nu,Cy	protein_coding	chr21	1.6812e+23	1.68191e+23	chr21	ENSG00000229425	16742819	16999661	-	Ch	2.139	12	GH21J015439,GH21J015437,GH21J015395	18.3794129944695,16.098669771104,11.681770569729	Sense	16437321	16999661	-562340	ENSG00000229425-NRIP1
HOXC9	ENSG00000180806	3	+	54388679	54397121	1.395	Ch,Nu,Cy,JQ1	protein_coding	chr12	5436560554365600	5442858654428580	chr12	ENSG00000260597	54413694	54416373	+	Ch,Cy,JQ1	1.205	1	GH12J053971,GH12J053971	607.010186875245,607.010186875245	Sense	54388679	54413694	-25015	ENSG00000260597-HOXC9
HOXC10	ENSG00000180818	2	+	54378849	54384063	-0.068	Ch,Nu,Cy,JQ1	protein_coding	chr12	5436560554365600	5442858654428580	chr12	ENSG00000260597	54413694	54416373	+	Ch,Cy,JQ1	1.205	1	GH12J053971,GH12J053971	603.43239013329,603.43239013329	Sense	54378849	54413694	-34845	ENSG00000260597-HOXC10
CUEDC1	ENSG00000180891	11	-	55938604	56032684	0.458	Ch,Nu,Cy,Ful,JQ1	protein_coding	chr17	5605956156059560	5606867556068670	chr17	ENSG00000264112	56066400	56072211	-	Ch,Nu,JQ1	0.942	2	GH17J057982,GH17J057982	11.6970779147718,11.6970779147718	Sense	56032684	56072211	-39527	ENSG00000264112-CUEDC1
ZNF322	ENSG00000181315	5	-	26636518	26659980	-0.1	Ch,Ful,JQ1	protein_coding	chr6	2624902826249020	2626205126262050	chr6	LncRNA1155	26257689	26257914	+	Ch,Nu,JQ1	0.745	2	GH06J026248,GH06J026248	12.4970127083479,12.4970127083479	Antisense	26659980	26257689	402291	LncRNA1155-ZNF322
GAS6	ENSG00000183087	15	-	114523522	114567046	1.17	Ch,Nu,Cy	protein_coding	chr13	1.14628e+17	1.14633e+17	chr13	ENSG00000260910	114629487	114631817	-	Ch,Nu,Cy	6.432	1	GH13J113925,GH13J113859	6.21270419294979,621.938078282585	Sense	114567046	114631817	-64771	ENSG00000260910-GAS6
ZNF703	ENSG00000183779	2	+	37553269	37557537	0.586	Ch,Nu,Cy,Tam,Ful,JQ1	protein_coding	chr8	3744628737446280	3745994037459940	chr8	ENSG00000254290	37454998	37457376	-	Nu,Cy,Ful,JQ1	0.14	2	GH08J037588,GH08J037588	11.811253842828,11.811253842828	Antisense	37553269	37457376	95893	ENSG00000254290-ZNF703
NOC4L	ENSG00000184967	15	+	132628993	132637013	0.869	Ch	protein_coding	chr12	132673145	132675390	chr12	ENSG00000256576	132671280	132674240	-	Ch	-2.014	2	GH12J132188	13.4386	Antisense	132628993	132674240	-45247	ENSG00000256576-NOC4L
SOWAHB	ENSG00000186212	1	-	77816082	77819002	-0.21	Cy,Tam,Ful	protein_coding	chr4	7786415477864150	7786575377865750	chr4	LncRNA1069	77862886	77867255	-	Nu,Ful,JQ1	0.481	1	GH04J076943,GH04J076943	18.5278185901559,18.5278185901559	Sense	77819002	77867255	-48253	LncRNA1069-SOWAHB
INSIG1	ENSG00000186480	6	+	155089486	155101945	-0.042	Ch,Nu,Cy,JQ1	protein_coding	chr7	1.54996e+44	1.55001e+44	chr7	LncRNA1819	155000588	155010565	+	Ch,Nu,Cy,Ful	-0.977	1	GH07J155203,GH07J155213,GH07J155213,GH07J155295,GH07J155203	7.74726092427713,17.0650575248385,17.0650575248385,600.665628627291,7.74726092427713	Sense	155089486	155000588	88898	LncRNA1819-INSIG1
C6orf132	ENSG00000188112	5	-	42068856	42110357	1.135	Ch,Nu,Cy	protein_coding	chr6	42061539	42064467	chr6	ENSG00000261068	42059971	42061997	-	Ch,Nu,Cy	2.018	1	GH06J042094	11.2434	Sense	42110357	42061997	48360	ENSG00000261068-C6orf132
TMEM120B	ENSG00000188735	13	+	122150658	122220907	0.386	Ch,Nu,Cy,Ful,JQ1	protein_coding	chr12	1.22222e+17	1.22246e+17	chr12	ENSG00000212694	122233173	122241812	-	Nu,JQ1	-1.002	7	GH12J121783,GH12J121783	5.30919055607511,5.30919055607511	Antisense	122150658	122241812	-91154	ENSG00000212694-TMEM120B
ARID2	ENSG00000189079	21	+	46123448	46301823	-0.454	Nu,Cy	protein_coding	chr12	46117583	46128149	chr12	ENSG00000273015	46111829	46121558	-	Ch,Nu	-0.583	1	GH12J045723	653.31	Antisense	46123448	46121558	1890	ENSG00000273015-ARID2
NCOR2	ENSG00000196498	47	-	124808961	125052135	1.446	Ch,Nu,Cy	protein_coding	chr12	125221960	125232737	chr12	LncRNA310	125226775	125226934	+	Cy	7.122	2	GH12J124737	2.21065	Antisense	125052135	125226775	-174640	LncRNA310-NCOR2
MYO6	ENSG00000196586	36	+	76458909	76629254	-0.244	Ch,Tam,Ful	protein_coding	chr6	7.64576e+47	7.64646e+47	chr6	LncRNA1202	76457087	76458801	-	Nu,Cy,Ful,JQ1	-1.192	1	GH06J075747,GH06J075748,GH06J075749,GH06J075747,GH06J075749,GH06J075748	605.109321301056,600.665628627291,600.665628627291,605.109321301056,600.665628627291,600.665628627291	Antisense	76458909	76458801	108	LncRNA1202-MYO6
ZNF860	ENSG00000197385	3	+	32023263	32033120	-0.852	Ch,Cy	protein_coding	chr3	31690891	31691368	chr3	LncRNA1000	31687795	31692555	-	Ch	-1.489	1	GH03J031649	3.94155	Antisense	32023263	31692555	330708	LncRNA1000-ZNF860
DIO3	ENSG00000197406	1	+	102027688	102029789	1.043	Ch,Nu,Cy,Tam,Ful,JQ1	protein_coding	chr14	1.02025e+17	1.02028e+17	chr14	ENSG00000258498	102018558	102026768	-	Ch,Nu,Ful	0.925	4	GH14J101559,GH14J101559	600.665628627291,600.665628627291	Antisense	102027688	102026768	920	ENSG00000258498-DIO3
PDGFA	ENSG00000197461	7	-	536895	559933	-0.515	Ch,Nu,Cy,JQ1	protein_coding	chr7	551304551304	563438563438	chr7	ENSG00000223855	560028	564869	+	Ch,Tam,Ful,JQ1	-0.682	3	GH07J000511,GH07J000511	610.662215114687,610.662215114687	Antisense	559933	560028	-95	ENSG00000223855-PDGFA
HOXC6	ENSG00000197757	3	+	54384408	54424607	1.449	Ch,Nu,Cy,JQ1	protein_coding	chr12	5436560554365600	5442858654428580	chr12	ENSG00000260597	54413694	54416373	+	Ch,Cy,JQ1	1.205	1	GH12J053971,GH12J053971	605.165404188048,605.165404188048	Sense	54384408	54413694	-29286	ENSG00000260597-HOXC6
HOXC4	ENSG00000198353	4	+	54410715	54449813	3.3	Ch,Nu,Cy	protein_coding	chr12	5.44711e+71	5.44721e+71	chr12	ENSG00000248265	54452038	54516018	+	Ch,Nu,Cy	2.931	2	GH12J054077,GH12J054076,GH12J054061,GH12J054075,GH12J054067,GH12J054079,GH12J054079,GH12J054070,GH12J053971	11.5088329809047,11.5276592668119,11.5102616169538,11.5276592668119,11.4515028212823,10.6837679938117,10.6837679938117,11.5276592668119,609.647756836866	Sense	54410715	54452038	-41323	ENSG00000248265-HOXC4
ZNF254	ENSG00000213096	6	+	24216276	24312654	-0.205	Cy,Ful,JQ1	protein_coding	chr19	2421531524215310	2421900324219000	chr19	ENSG00000268362	24216247	24249711	+	Ch,Ful,JQ1	-0.492	7	GH19J024032,GH19J024032	601.995399570974,601.995399570974	Sense	24216276	24216247	29	ENSG00000268362-ZNF254
CLDN9	ENSG00000213937	1	+	3062457	3064506	-0.135	Ch,Nu,Tam,Ful	protein_coding	chr16	30534023053402	30620333062033	chr16	ENSG00000272079	3056121	3057389	+	Ch,Ful,JQ1	-0.157	1	GH16J003003,GH16J003003	6.81028753608154,6.81028753608154	Sense	3062457	3056121	6336	ENSG00000272079-CLDN9
ERVMER34-1	ENSG00000226887	4	-	53588785	53617807	1.041	Ch,Nu,Cy	protein_coding	chr4	53616727	53618370	chr4	LncRNA1046	53618201	53622781	+	Nu	0.811	2	GH04J052750	600.666	Antisense	53617807	53618201	-394	LncRNA1046-ERVMER34-1
STMND1	ENSG00000230873	5	+	17102489	17131603	0.664	Nu,Cy	protein_coding	chr6	17012295	17015730	chr6	LncRNA1798	17010739	17012721	-	Ch,Nu,Cy	-2.072	1	GH06J017012	8.2986	Antisense	17102489	17012721	89768	LncRNA1798-STMND1
NME1	ENSG00000239672	6	+	49230897	49239789	0.502	Ch,Nu,Cy	protein_coding	chr17	49019030	49029997	chr17	ENSG00000247011	49012350	49022074	-	Ch,Nu,Cy	-3.119	2	GH17J050941	17.3129	Antisense	49230897	49022074	208823	ENSG00000247011-NME1
NPIPA2	ENSG00000254852	8	+	14841923	14859270	-5.562	Nu	protein_coding	chr16	14839258	14842487	chr16	LncRNA1612	14840587	14841866	+	Ch	0.619	1	GH16J014746	600.666	Sense	14841923	14840587	1336	LncRNA1612-NPIPA2
NOX5	ENSG00000255346	17	+	69222864	69355083	-2.061	Ch	protein_coding	chr15	69365741	69367630	chr15	ENSG00000212766	69365266	69388160	+	Ch	-3.188	5	GH15J069073	10.5628	Sense	69222864	69365266	-142402	ENSG00000212766-NOX5
OR8R1P	ENSG00000256347	2	+	72959824	72960912	4.995	Ch	pseudogene	chr11	72959191	72961845	chr11	LncRNA245	72956521	72959333	+	Ch,Nu,Cy	2.978	1	GH11J073248	600.666	Sense	72959824	72956521	3303	LncRNA245-OR8R1P
BAHCC1	ENSG00000266074	28	+	79369275	79440126	-1.38	Ch,Nu	protein_coding	chr17	79358601	79381118	chr17	ENSG00000262877	79361926	79364056	-	Ch,Nu	-1.561	2	GH17J081384	603.743	Antisense	79369275	79364056	5219	ENSG00000262877-BAHCC1
CREBBP	ENSG00000005339	31	-	3775055	3930727	-0.099	Ful,JQ1	protein_coding	chr16	4302801	4304478	chr16	ENSG00000262468	4295826	4303790	-	JQ1	0.476	4	GH16J004252	50.1625	Sense	3930727	4303790	-373063	ENSG00000262468-CREBBP
RALA	ENSG00000006451	5	+	39663082	39747723	0.31	JQ1	protein_coding	chr7	3.97976e+87	3.97982e+87	chr7	ENSG00000188185	39773231	39832691	+	Ful,JQ1	-0.01	12	GH07J039758,GH07J039746,GH07J039732,GH07J039735,GH07J039742,GH07J039751,GH07J039749,GH07J039757,GH07J039753,GH07J039752,GH07J039748	10.6962886563915,11.6962003593607,13.9530978526296,11.4684434691053,11.8928725698658,10.6249783907199,11.3888891659924,10.6964291510624,10.6964291510624,10.6249783907199,11.3888891659924	Sense	39663082	39773231	-110149	ENSG00000188185-RALA
LUC7L	ENSG00000007392	11	-	238968	279462	0.801	JQ1	protein_coding	chr16	573999	581583	chr16	ENSG00000277142	575155	577407	-	JQ1	-0.612	1	GH16J000523	11.087	Sense	279462	577407	-297945	ENSG00000277142-LUC7L
JARID2	ENSG00000008083	18	+	15246527	15522252	-0.234	Tam,Ful,JQ1	protein_coding	chr6	14928833,14910399,15020632,15014032,14883601,14953433,14791433,14967741,14857075,14919592,14748033,14731798,14887832,14720501,15061487,14975033,14863032,14755632,14891432,15017201,14781832,14776233,14938632,14965692,14920451,15073232,15086349,14727219,14881727,14828185,14982032,14875420,15241832	14931231,14912391,15024119,15015831,14884600,14959231,14793230,14967890,14858531,14919766,14749231,14736405,14891030,14723894,15064588,14977231,14869431,14769031,14892631,15018309,14782431,14779230,14939031,14967384,14923419,15074431,15092166,14731443,14881903,14828400,14983031,14876058,15251232	chr6	ENSG00000234261	14662060	15090234	-	JQ1	-1.151	4	GH06J014929,GH06J014910,GH06J015021,GH06J015013,GH06J014883,GH06J014953,GH06J014792,GH06J014967,GH06J014856,GH06J014919,GH06J014748,GH06J014731,GH06J014888,GH06J014720,GH06J015061,GH06J014975,GH06J014863,GH06J014758,GH06J014891,GH06J015016,GH06J014781,GH06J014776,GH06J014938,GH06J014965,GH06J014920,GH06J015073,GH06J015086,GH06J014726,GH06J014881,GH06J014827,GH06J014982,GH06J014875,GH06J015241	1.64926764414517,11.3744035352459,1.44617952445177,10.8994192553375,7.00041525733165,10.5318731370439,9.31773321532584,10.5761183109221,16.6098251611692,4.87697474576068,8.69158354660746,10.9470602733409,7.46227048614244,10.2179292027781,8.92351484981496,6.77294398113675,19.71217590004,11.4052903250098,6.30423437401374,19.6633285133301,5.12855702203825,4.61315571178035,10.764398618127,10.57611831…	Antisense	15246527	15090234	156293	ENSG00000234261-JARID2
ZNF200	ENSG00000010539	5	-	3272325	3286221	0.081	Ful,JQ1	protein_coding	chr16	3053402	3062033	chr16	ENSG00000272079	3056121	3057389	+	Ful,JQ1	0.553	1	GH16J003003	13.2009	Antisense	3286221	3056121	230100	ENSG00000272079-ZNF200
SYT7	ENSG00000011347	14	-	61282785	61348620	-0.302	JQ1	protein_coding	chr11	61353814	61356556	chr11	ENSG00000250230	61355966	61375022	+	JQ1	-2.235	4	GH11J061586	600.666	Antisense	61348620	61355966	-7346	ENSG00000250230-SYT7
SEMA3B	ENSG00000012171	19	+	50304990	50314977	-0.828	Ful,JQ1	processed_transcript	chr3	50295267	50311432	chr3	ENSG00000230454	50297735	50300790	+	JQ1	-0.613	2	GH03J050257	602.446	Sense	50304990	50297735	7255	ENSG00000230454-SEMA3B
ANGEL1	ENSG00000013523	10	-	77253588	77292589	0.11	Ful,JQ1	protein_coding	chr14	7725192177252730	7725237677254660	chr14	ENSG00000258301	77248076	77253067	-	Ful,JQ1	0.137	3	GH14J076785,GH14J076786	11.028000168245,11.0401529572821	Sense	77292589	77253067	39522	ENSG00000258301-ANGEL1
RALBP1	ENSG00000017797	10	+	9475007	9538114	0.273	JQ1	protein_coding	chr18	9473782	9478276	chr18	ENSG00000273335	9473419	9474004	-	JQ1	1.713	1	GH18J009473	615.033	Antisense	9475007	9474004	1003	ENSG00000273335-RALBP1
NDUFS1	ENSG00000023228	19	-	206979541	207024327	-0.267	JQ1	protein_coding	chr2	206945799	206953125	chr2	ENSG00000227946	206949329	206951288	+	JQ1	-1.214	2	GH02J206081	52.8036	Antisense	207024327	206949329	74998	ENSG00000227946-NDUFS1
SNAPC1	ENSG00000023608	10	+	62229075	62263146	-0.167	Tam,Ful,JQ1	protein_coding	chr14	6.22023e+31	6.22027e+31	chr14	ENSG00000258667	62182276	62217815	-	Tam,Ful	13.977	3	GH14J061738,GH14J061694,GH14J061747,GH14J061736	11.4483839720299,5.62067353430794,11.4870399809153,11.476588277223	Antisense	62229075	62217815	11260	ENSG00000258667-SNAPC1
EHD2	ENSG00000024422	6	+	48216600	48246391	-0.806	JQ1	protein_coding	chr19	47745802	47748293	chr19	LncRNA1669	47744698	47746507	-	JQ1	-0.842	1	GH19J047242	21.8113	Antisense	48216600	47746507	470093	LncRNA1669-EHD2
BCLAF1	ENSG00000029363	15	-	136578001	136610989	0.879	JQ1	protein_coding	chr6	136656511	136657605	chr6	ENSG00000260418	136656852	136657225	-	JQ1	1.009	1	GH06J136335	10.8904	Sense	136610989	136657225	-46236	ENSG00000260418-BCLAF1
IKZF2	ENSG00000030419	9	-	213864429	214017151	-0.02	Tam,Ful,JQ1	protein_coding	chr2	214005779	214019527	chr2	ENSG00000270659	214017694	214018383	+	Ful,JQ1	0.027	1	GH02J213141	621.746	Antisense	214017151	214017694	-543	ENSG00000270659-IKZF2
JADE2	ENSG00000043143	12	+	133860003	133918918	-2.18	JQ1	protein_coding	chr5	133838557	133843956	chr5	ENSG00000251169	133842243	133844920	+	JQ1	-2.812	2	GH05J134503	604.954	Sense	133860003	133842243	17760	ENSG00000251169-JADE2
KITLG	ENSG00000049130	10	-	88886570	88974628	0.904	Tam,Ful	protein_coding	chr12	89673778	89676977	chr12	ENSG00000257156	89441964	89703330	-	Ful	15.231	4	GH12J089280	5.75906	Sense	88974628	89703330	-728702	ENSG00000257156-KITLG
H6PD	ENSG00000049239	5	+	9294834	9331396	0.274	Ful	protein_coding	chr1	9.21366e+27	9.21503e+27	chr1	ENSG00000228526	9208070	9257042	-	Tam,JQ1	-0.428	2	GH01J009153,GH01J009159,GH01J009162,GH01J009155	10.960186967063,10.967808802962,5.03943764789308,10.967808802962	Antisense	9294834	9257042	37792	ENSG00000228526-H6PD
CLPTM1L	ENSG00000049656	17	-	1317859	1345214	-0.033	Ful,JQ1	protein_coding	chr5	1343606	1346736	chr5	LncRNA1080	1345410	1350940	+	Tam,Ful,JQ1	0.101	1	GH05J001343	600.666	Antisense	1345214	1345410	-196	LncRNA1080-CLPTM1L
ARID4B	ENSG00000054267	25	-	235294949	235491534	0.211	JQ1	protein_coding	chr1	2.35089e+17	2.35102e+17	chr1	ENSG00000238005	235093089	235105809	-	JQ1	-2.001	4	GH01J234953,GH01J234968	53.7194671201186,119.191903520263	Sense	235491534	235105809	385725	ENSG00000238005-ARID4B
USP36	ENSG00000055483	21	-	76783463	76837523	-0.302	Tam,Ful	protein_coding	chr17	76346001	76357890	chr17	ENSG00000266970	76356534	76369992	+	JQ1	-1.749	5	GH17J078349	57.191	Antisense	76837523	76356534	480989	ENSG00000266970-USP36
TARBP1	ENSG00000059588	30	-	234527059	234614849	-0.365	JQ1	protein_coding	chr1	235104097	235125430	chr1	ENSG00000238005	235093089	235105809	-	JQ1	-2.001	4	GH01J234968	13.9647	Sense	234614849	235105809	-490960	ENSG00000238005-TARBP1
CTDP1	ENSG00000060069	13	+	77439801	77514510	0.409	JQ1	protein_coding	chr18	77437481	77442601	chr18	ENSG00000274828	77437287	77439358	-	JQ1	-0.823	1	GH18J079677	644.673	Antisense	77439801	77439358	443	ENSG00000274828-CTDP1
VMP1	ENSG00000062716	12	+	57784553	57919616	0.254	Tam,Ful,JQ1	protein_coding	chr17	57693640	57701762	chr17	ENSG00000273702	57695914	57697075	-	Ful,JQ1	0.257	1	GH17J059616	1.7059	Antisense	57784553	57697075	87478	ENSG00000273702-VMP1
DLX3	ENSG00000064195	3	-	48067369	48072588	-0.731	JQ1	protein_coding	chr17	47963116	47969235	chr17	ENSG00000248954	47964961	47978257	+	JQ1	-2.432	5	GH17J049885	14.2411	Antisense	48072588	47964961	107627	ENSG00000248954-DLX3
NGFR	ENSG00000064300	6	+	47572655	47592379	1.74	Ful,JQ1	protein_coding	chr17	47536363	47537562	chr17	ENSG00000249497	47535223	47539111	-	Tam	-27.622	3	GH17J049459	11.1189	Antisense	47572655	47539111	33544	ENSG00000249497-NGFR
SLC12A2	ENSG00000064651	27	+	127419458	127525380	0.439	Tam,Ful,JQ1	protein_coding	chr5	1.27329e+80	1.2733e+80	chr5	ENSG00000245937	127276118	127418864	-	JQ1	-0.207	5	GH05J127993,GH05J128014,GH05J128035,GH05J128053,GH05J127950,GH05J128081,GH05J127940,GH05J127967,GH05J127957	8.16421119267675,5.29306201226506,4.47557400303764,18.1093399383307,8.0055661209814,605.642808619108,7.17832575308352,9.06479707239095,7.6327494576803	Antisense	127419458	127418864	594	ENSG00000245937-SLC12A2
CDK13	ENSG00000065883	14	+	39989636	40136733	0.215	Ful	protein_coding	chr7	3977187939793380	3977552739795620	chr7	ENSG00000188185	39773231	39832691	+	Ful,JQ1	-0.01	12	GH07J039732,GH07J039753	37.0202218006458,10.4208723332901	Sense	39989636	39773231	216405	ENSG00000188185-CDK13
PFKP	ENSG00000067057	24	+	3108525	3179904	-0.265	Tam,Ful	protein_coding	chr10	3107793	3107993	chr10	ENSG00000273001	3107616	3108193	-	JQ1	-1.714	1	GH10J003065	609.342	Antisense	3108525	3108193	332	ENSG00000273001-PFKP
DHX8	ENSG00000067596	23	+	41561233	41621831	0.192	JQ1	protein_coding	chr17	41526453	41527767	chr17	ENSG00000267151	41522075	41528568	+	JQ1	-1.573	2	GH17J043448	11.7571	Sense	41561233	41522075	39158	ENSG00000267151-DHX8
GNB5	ENSG00000069966	13	-	52413117	52483566	0.213	JQ1	protein_coding	chr15	52407398	52409260	chr15	ENSG00000259327	52408771	52414328	+	Ful	-0.833	2	GH15J052115	8.41364	Antisense	52483566	52408771	74795	ENSG00000259327-GNB5
PFN2	ENSG00000070087	4	-	149682691	149768575	-0.466	JQ1	protein_coding	chr3	1.49953e+17	1.49957e+17	chr3	ENSG00000244541	149956306	149957996	+	JQ1	-1.295	3	GH03J150234,GH03J150243	10.9525204479232,10.614432122911	Antisense	149768575	149956306	-187731	ENSG00000244541-PFN2
RNF126	ENSG00000070423	9	-	647526	663277	-0.057	Ful,JQ1	protein_coding	chr19	657309	665601	chr19	ENSG00000267666	663482	669500	+	Ful	0.593	2	GH19J000657	605.398	Antisense	663277	663482	-205	ENSG00000267666-RNF126
ATP2B1	ENSG00000070961	21	-	89981828	90103077	0.463	Tam,Ful,JQ1	protein_coding	chr12	90098377	90105777	chr12	ENSG00000271614	90102736	90106367	+	Ful	0.5	1	GH12J089704	605.078	Antisense	90103077	90102736	341	ENSG00000271614-ATP2B1
VASH1	ENSG00000071246	7	+	77228532	77249354	0.323	JQ1	protein_coding	chr14	7.72527e+23	7.72547e+23	chr14	ENSG00000258301	77248076	77253067	-	Ful,JQ1	0.137	3	GH14J076786,GH14J076785,GH14J076780	11.7109521736814,11.7391564788745,13.0912197307562	Antisense	77228532	77253067	-24535	ENSG00000258301-VASH1
ATP6AP1	ENSG00000071553	10	+	153656978	153664862	0.121	JQ1	protein_coding	chrX	153654945	153660549	chrX	ENSG00000197180	153652723	153656825	-	JQ1	-0.258	2	GH0XJ154426	600.666	Antisense	153656978	153656825	153	ENSG00000197180-ATP6AP1
TFRC	ENSG00000072274	19	-	195754054	195809060	-0.52	Tam,Ful	protein_coding	chr3	1.95875e+26	1.95878e+26	chr3	ENSG00000224652	195869507	195887761	+	JQ1	-2.575	3	GH03J196149,GH03J196154,GH03J196156	11.9753514426102,11.9657978049857,11.9657978049857	Antisense	195809060	195869507	-60447	ENSG00000224652-TFRC
TTC38	ENSG00000075234	14	+	46663858	46689905	0.293	JQ1	protein_coding	chr22	46690760	46694498	chr22	ENSG00000277232	46691040	46692557	-	JQ1	-2.947	1	GH22J046294	52.8478	Antisense	46663858	46692557	-28699	ENSG00000277232-TTC38
FOSL2	ENSG00000075426	4	+	28615315	28640179	-0.549	Ful,JQ1	protein_coding	chr2	28643268	28652067	chr2	ENSG00000270210	28648812	28649586	+	JQ1	2.586	1	GH02J028420	11.5342	Sense	28615315	28648812	-33497	ENSG00000270210-FOSL2
DLG1	ENSG00000075711	26	-	196769431	197026171	-0.244	JQ1	protein_coding	chr3	197233672	197233871	chr3	ENSG00000272989	197232133	197233857	-	JQ1	-29.448	1	GH03J197506	6.7926	Sense	197026171	197233857	-207686	ENSG00000272989-DLG1
NT5C2	ENSG00000076685	19	-	104845940	104953056	-0.255	Tam,Ful,JQ1	protein_coding	chr10	104949864	104954358	chr10	LncRNA181	104953093	104955348	+	Ful,JQ1	-0.782	1	GH10J103190	604.91	Antisense	104953056	104953093	-37	LncRNA181-NT5C2
CTTNBP2	ENSG00000077063	23	-	117350705	117514193	-2.167	JQ1	protein_coding	chr7	1.17637e+17	1.17639e+17	chr7	ENSG00000234826	117638912	117644099	-	JQ1	10.623	3	GH07J117997,GH07J118003	10.1761855216912,10.6638548590709	Sense	117514193	117644099	-129906	ENSG00000234826-CTTNBP2
FGFR1	ENSG00000077782	19	-	38268656	38326352	1.424	JQ1	protein_coding	chr8	3.8402e+63	3.84023e+63	chr8	ENSG00000253361	38401170	38410198	-	JQ1	-1.56	3	GH08J038544,GH08J038553,GH08J038552,GH08J038547,GH08J038549,GH08J038548,GH08J038543,GH08J038540	10.8718732832042,11.2260395938977,10.7978065881807,12.4038229696647,11.0664301900831,11.0740520259821,10.8863091106443,10.8863091106443	Sense	38326352	38410198	-83846	ENSG00000253361-FGFR1
MEF2C	ENSG00000081189	12	-	88013975	88199922	1.612	Tam,Ful,JQ1	protein_coding	chr5	8.78512e+47	8.78532e+47	chr5	ENSG00000245526	87803363	87986858	-	JQ1	-1.939	7	GH05J088555,GH05J088669,GH05J088696,GH05J088540,GH05J088695,GH05J088659	2.06757946378617,6.13396514823812,2.20722817394779,5.11184898448101,4.40507573967796,7.38630599951414	Sense	88199922	87986858	213064	ENSG00000245526-MEF2C
DUSP12	ENSG00000081721	6	+	161719548	161727028	-0.352	JQ1	protein_coding	chr1	1.61699e+17	1.61701e+17	chr1	LncRNA69	161699937	161701570	+	JQ1	-1.694	1	GH01J161729,GH01J161733	6.31194863955059,6.32329372617912	Sense	161719548	161699937	19611	LncRNA69-DUSP12
CHERP	ENSG00000085872	17	-	16628700	16653341	0.017	Ful,JQ1	protein_coding	chr19	16651611	16654812	chr19	ENSG00000269399	16653434	16655625	-	JQ1	0.793	2	GH19J016540	621.443	Sense	16653341	16655625	-2284	ENSG00000269399-CHERP
DDX18	ENSG00000088205	14	+	118572226	118589955	-0.283	Ful	protein_coding	chr2	118593121	118594577	chr2	ENSG00000236255	118591513	118599234	+	JQ1	2.494	3	GH02J117835	6.91351	Sense	118572226	118591513	-19287	ENSG00000236255-DDX18
MAPKAPK5	ENSG00000089022	14	+	112279782	112334343	-0.193	Tam,Ful	protein_coding	chr12	112278004	112282005	chr12	ENSG00000234608	112277568	112280706	-	JQ1	0.276	4	GH12J111840	600.666	Antisense	112279782	112280706	-924	ENSG00000234608-MAPKAPK5
SPTLC1	ENSG00000090054	15	-	94794281	94877666	0.422	JQ1	protein_coding	chr9	9490040194907880	9490488394911430	chr9	ENSG00000225511	94903580	94922396	+	JQ1	-1.653	6	GH09J092138,GH09J092145	5.35626351194568,11.28639842687	Antisense	94877666	94903580	-25914	ENSG00000225511-SPTLC1
TRPM7	ENSG00000092439	39	-	50844670	50979012	0.193	JQ1	protein_coding	chr15	5117078151167790	5117414351169810	chr15	ENSG00000273674	51132072	51200796	-	Tam	1.341	5	GH15J050878,GH15J050876	12.8626245111272,13.0405953597836	Sense	50979012	51200796	-221784	ENSG00000273674-TRPM7
CREM	ENSG00000095794	10	+	35415719	35501886	0.411	JQ1	protein_coding	chr10	35262513	35263528	chr10	ENSG00000283000	35258837	35264506	+	JQ1	-0.631	3	GH10J034973	6.85052	Sense	35415719	35258837	156882	ENSG00000283000-CREM
SCD	ENSG00000099194	6	+	102106881	102124591	0.232	Ful,JQ1	protein_coding	chr10	1.02139e+35	1.02141e+35	chr10	ENSG00000235823	102133372	102143125	+	Tam,Ful,JQ1	-0.27	2	GH10J100379,GH10J100369,GH10J100376,GH10J100378	12.2442016660921,12.9147642128232,12.2631684466703,12.2442016660921	Sense	102106881	102133372	-26491	ENSG00000235823-SCD
HSD3B7	ENSG00000099377	7	+	30996519	31000473	-1.002	JQ1	protein_coding	chr16	30967534	30970890	chr16	ENSG00000275263	30968193	30968520	-	JQ1	-1.955	1	GH16J030956	39.7535	Antisense	30996519	30968520	27999	ENSG00000275263-HSD3B7
SETD1A	ENSG00000099381	19	+	30968615	30996437	-0.229	JQ1	protein_coding	chr16	30967534	30970890	chr16	ENSG00000275263	30968193	30968520	-	JQ1	-1.955	1	GH16J030956	708.66	Antisense	30968615	30968520	95	ENSG00000275263-SETD1A
CEP170B	ENSG00000099814	19	+	105331617	105363107	0.593	JQ1	protein_coding	chr14	1.05286e+35	1.05288e+35	chr14	ENSG00000258701	105287538	105290055	+	JQ1	-0.61	1	GH14J104820,GH14J104860,GH14J104863,GH14J104823	9.96735075474171,12.3640409214698,614.816322869778,11.2885253718591	Sense	105331617	105287538	44079	ENSG00000258701-CEP170B
SNAP29	ENSG00000099940	5	+	21213271	21245506	0.275	JQ1	protein_coding	chr22	21302253	21313089	chr22	ENSG00000237476	21311380	21318967	+	JQ1	-1.731	2	GH22J020947	42.436	Sense	21213271	21311380	-98109	ENSG00000237476-SNAP29
CRKL	ENSG00000099942	4	+	21271714	21308037	0.122	Ful,JQ1	protein_coding	chr22	21302253	21313089	chr22	ENSG00000237476	21311380	21318967	+	JQ1	-1.731	2	GH22J020947	25.4202	Sense	21271714	21311380	-39666	ENSG00000237476-CRKL
LZTR1	ENSG00000099949	22	+	21333751	21353327	-1.294	JQ1	protein_coding	chr22	21302253	21313089	chr22	ENSG00000237476	21311380	21318967	+	JQ1	-1.731	2	GH22J020947	39.3683	Sense	21333751	21311380	22371	ENSG00000237476-LZTR1
PRODH	ENSG00000100033	15	-	18900294	18924066	0.379	Ful	protein_coding	chr22	18944514	18946514	chr22	ENSG00000280418	18939447	18947025	-	Ful	-17.456	1	GH22J018957	10.7418	Sense	18924066	18947025	-22959	ENSG00000280418-PRODH
PIK3IP1	ENSG00000100100	6	-	31677579	31688520	-0.414	Ful,JQ1	protein_coding	chr22	31735989	31744240	chr22	ENSG00000213888	31742763	31744705	+	Ful,JQ1	-0.424	1	GH22J031340	5.7948	Antisense	31688520	31742763	-54243	ENSG00000213888-PIK3IP1
PATZ1	ENSG00000100105	5	-	31721790	31742218	-1.171	JQ1	protein_coding	chr22	31735989	31744240	chr22	ENSG00000213888	31742763	31744705	+	Ful,JQ1	-0.424	1	GH22J031340	600.666	Antisense	31742218	31742763	-545	ENSG00000213888-PATZ1
TFIP11	ENSG00000100109	16	-	26887191	26908471	0.205	JQ1	protein_coding	chr22	27036746	27042965	chr22	ENSG00000225783	27042392	27072438	+	Ful	-1.504	6	GH22J026640	32.3917	Antisense	26908471	27042392	-133921	ENSG00000225783-TFIP11
CRYBB1	ENSG00000100122	6	-	26995242	27014052	16.259	JQ1	protein_coding	chr22	2.70558e+71	2.70562e+71	chr22	ENSG00000225783	27042392	27072438	+	Ful	-1.504	6	GH22J026659,GH22J026647,GH22J026668,GH22J026657,GH22J026668,GH22J026664,GH22J026660,GH22J026662,GH22J026640	11.6360422029133,11.609516591187,11.2413483509072,11.6360422029133,11.2413483509072,11.5008531902203,11.6360422029133,11.6360422029133,13.0133345620543	Antisense	27014052	27042392	-28340	ENSG00000225783-CRYBB1
TCF20	ENSG00000100207	5	-	42556019	42739622	-0.169	Ful	protein_coding	chr22	4.26694e+31	4.26732e+31	chr22	ENSG00000182057	42665759	42671202	+	Ful	-1.212	4	GH22J042273,GH22J042268,GH22J042366,GH22J042364	11.5961768147559,11.5866231771314,11.0387153413414,20.6056086308466	Antisense	42739622	42665759	73863	ENSG00000182057-TCF20
POLDIP3	ENSG00000100227	9	-	42979727	43010968	0.22	JQ1	protein_coding	chr22	43077613	43081042	chr22	LncRNA1741	43077894	43082415	-	Ful	-0.721	1	GH22J042681	17.0086	Sense	43010968	43082415	-71447	LncRNA1741-POLDIP3
CYB5R3	ENSG00000100243	10	-	43013846	43045574	0.21	JQ1	protein_coding	chr22	4307761343081570	4308104243086470	chr22	LncRNA1741	43077894	43082415	-	Ful	-0.721	1	GH22J042681,GH22J042685	20.3700065061728,11.9777836265575	Sense	43045574	43082415	-36841	LncRNA1741-CYB5R3
MYH9	ENSG00000100345	41	-	36677327	36784063	0.276	JQ1	protein_coding	chr22	36845203	36869221	chr22	LncRNA1740	36861834	36861907	-	JQ1	-29.735	2	GH22J036449	1.96784	Sense	36784063	36861907	-77844	LncRNA1740-MYH9
TXN2	ENSG00000100348	5	-	36863083	36878077	-0.223	JQ1	protein_coding	chr22	36845203	36869221	chr22	LncRNA1740	36861834	36861907	-	JQ1	-29.735	2	GH22J036449	10.1696	Sense	36878077	36861907	16170	LncRNA1740-TXN2
SLC25A17	ENSG00000100372	11	-	41165634	41215403	-0.335	Ful	protein_coding	chr22	41140205	41140604	chr22	LncRNA944	41134874	41140394	-	Tam,Ful,JQ1	-0.658	1	GH22J040744	11.0123	Sense	41215403	41140394	75009	LncRNA944-SLC25A17
KHNYN	ENSG00000100441	8	+	24898492	24910540	0.029	Tam,Ful,JQ1	protein_coding	chr14	24910528	24913206	chr14	LncRNA373	24912196	24912347	+	JQ1	-1.044	2	GH14J024441	35.8089	Sense	24898492	24912196	-13704	LncRNA373-KHNYN
VCPKMT	ENSG00000100483	6	-	50575350	50583318	0.399	JQ1	protein_coding	chr14	5.049e+167	5.04918e+167	chr14	ENSG00000214900	50394289	50559361	-	Ful,JQ1	-0.411	12	GH14J050023,GH14J049940,GH14J050057,GH14J050017,GH14J049954,GH14J050080,GH14J049985,GH14J049997,GH14J050054,GH14J050069,GH14J050020,GH14J050055,GH14J049945,GH14J050026,GH14J049984,GH14J050090,GH14J050071,GH14J049958,GH14J050012,GH14J049969,GH14J050043	10.4982940699155,10.3758843803749,23.6511837750817,10.4966783811996,10.9300306938047,40.3397039786199,10.7753798388679,15.5915393270395,11.2218114350292,13.0478201548591,10.4982940699155,11.2218114350292,10.6318392272902,11.2656763277014,10.5716209592563,23.8504239927047,29.9809072323931,10.9392330947519,14.7619920125574,25.070545257814,11.3159334186913	Sense	50583318	50559361	23957	ENSG00000214900-VCPKMT
CEP128	ENSG00000100629	25	-	80943330	81425861	0.425	JQ1	protein_coding	chr14	81635717	81637630	chr14	LncRNA387	81636837	81638151	+	JQ1	1.719	1	GH14J081169	10.2343	Antisense	81425861	81636837	-210976	LncRNA387-CEP128
HIF1A	ENSG00000100644	15	+	62162231	62214976	-0.491	Tam,Ful	protein_coding	chr14	6.20811e+223	6.20843e+223	chr14	ENSG00000232774	62037258	62125414	+	Ful,JQ1	-0.04	5	GH14J061614,GH14J061653,GH14J061580,GH14J061590,GH14J061641,GH14J061631,GH14J061640,GH14J061551,GH14J061606,GH14J061619,GH14J061589,GH14J061646,GH14J061601,GH14J061635,GH14J061592,GH14J061725,GH14J061741,GH14J061717,GH14J061593,GH14J061627,GH14J061655,GH14J061690,GH14J061694,GH14J061598,GH14J061599,GH14J061648,GH14J061743,GH14J061747	11.0836569032917,11.825451521505,14.4555776356677,10.9441687649201,18.0786353814997,10.686420794804,15.3228113473304,23.0430945020919,12.1717382054912,16.8435443513478,10.9441687649201,11.3432888491264,20.0607133769986,10.7583087203556,20.3010824554078,12.1144641750968,10.690799250975,13.2871627258159,20.3010824554078,11.0557020188797,11.8376043105421,3.40458450762316,600.665628627291,12.16049863…	Sense	62162231	62037258	124973	ENSG00000232774-HIF1A
DIDO1	ENSG00000101191	16	-	61509090	61569304	-0.569	JQ1	protein_coding	chr20	61553552	61562082	chr20	ENSG00000273759	61559973	61560649	-	JQ1	0.716	1	GH20J062922	648.12	Sense	61569304	61560649	8655	ENSG00000273759-DIDO1
GID8	ENSG00000101193	5	+	61569471	61576996	0.19	JQ1	protein_coding	chr20	61553552	61562082	chr20	ENSG00000273759	61559973	61560649	-	JQ1	0.716	1	GH20J062922	14.3421	Antisense	61569471	61560649	8822	ENSG00000273759-GID8
RBFA	ENSG00000101546	7	+	77794358	77806397	-0.106	Tam,Ful,JQ1	protein_coding	chr18	77828801	77829200	chr18	ENSG00000261126	77806900	77853362	+	JQ1	0.559	5	GH18J080068	9.57127	Sense	77794358	77806900	-12542	ENSG00000261126-RBFA
KLF8	ENSG00000102349	7	+	56258854	56314322	0.393	Ful	protein_coding	chrX	55933634	55936833	chrX	ENSG00000227486	55934556	56041606	+	JQ1	-1.258	2	GH0XJ055907	600.666	Sense	56258854	55934556	324298	ENSG00000227486-KLF8
PBDC1	ENSG00000102390	6	+	75392771	75398039	-0.464	JQ1	protein_coding	chrX	7541223975401980	7541263875405640	chrX	LncRNA1450	75411096	75414458	+	JQ1	0.769	1	GH0XJ076192,GH0XJ076182	5.74329939858528,5.83594405058773	Sense	75392771	75411096	-18325	LncRNA1450-PBDC1
ACP5	ENSG00000102575	7	-	11685475	11689823	-2.466	JQ1	protein_coding	chr19	1.17496e+23	1.17518e+23	chr19	ENSG00000197332	11750591	11797384	+	JQ1	1.206	10	GH19J011639,GH19J011666,GH19J011665	7.20793544839156,7.07218165352284,6.60333161825655	Antisense	11689823	11750591	-60768	ENSG00000197332-ACP5
PSMD7	ENSG00000103035	8	+	74330673	74340186	-0.146	JQ1	protein_coding	chr16	74400298	74404299	chr16	ENSG00000261079	74401360	74403724	+	JQ1	-0.917	1	GH16J074367	10.4542	Sense	74330673	74401360	-70687	ENSG00000261079-PSMD7
CRISPLD2	ENSG00000103196	15	+	84853590	84954374	0.775	Tam,Ful,JQ1	protein_coding	chr16	84961407	84964632	chr16	ENSG00000260340	84961959	84973209	+	JQ1	1.42	3	GH16J084927	22.758	Sense	84853590	84961959	-108369	ENSG00000260340-CRISPLD2
TSC2	ENSG00000103197	42	+	2097466	2138716	0.2	JQ1	protein_coding	chr16	2197100	2214482	chr16	ENSG00000260260	2204798	2205359	-	JQ1	0.367	2	GH16J002147	68.7267	Antisense	2097466	2205359	-107893	ENSG00000260260-TSC2
CAPN15	ENSG00000103326	14	+	577717	604636	-0.402	Tam,Ful,JQ1	protein_coding	chr16	573999	581583	chr16	ENSG00000277142	575155	577407	-	JQ1	-0.612	1	GH16J000523	609.083	Antisense	577717	577407	310	ENSG00000277142-CAPN15
RBL2	ENSG00000103479	22	+	53467889	53525561	0.042	Tam,Ful,JQ1	protein_coding	chr16	5.34205e+23	5.34215e+23	chr16	ENSG00000262714	53420856	53422997	+	Tam,Ful	0.551	1	GH16J053386,GH16J053376,GH16J053372	6.46273995990363,6.336141346275,600.213060168495	Sense	53467889	53420856	47033	ENSG00000262714-RBL2
KAT8	ENSG00000103510	12	+	31127075	31142714	0.243	JQ1	protein_coding	chr16	30967534	30970890	chr16	ENSG00000275263	30968193	30968520	-	JQ1	-1.955	1	GH16J030956	60.8323	Antisense	31127075	30968520	158555	ENSG00000275263-KAT8
BMF	ENSG00000104081	5	-	40380091	40401093	0.575	Tam,Ful,JQ1	protein_coding	chr15	4.03546e+23	4.0363e+23	chr15	ENSG00000248508	40331512	40359491	+	JQ1	-0.639	4	GH15J040062,GH15J040044,GH15J040061	12.2840846121601,31.5868639843004,11.7378699188303	Antisense	40401093	40331512	69581	ENSG00000248508-BMF
EIF3J	ENSG00000104131	8	+	44829255	44855227	-0.063	Tam,Ful,JQ1	protein_coding	chr15	44827598	44831199	chr15	ENSG00000179523	44819455	44829121	-	JQ1	-0.579	3	GH15J044535	600.666	Antisense	44829255	44829121	134	ENSG00000179523-EIF3J
RIPK2	ENSG00000104312	11	+	90769975	90803291	0.574	JQ1	protein_coding	chr8	9.07666e+39	9.07732e+39	chr8	ENSG00000251136	90621638	90769955	-	JQ1	-0.321	7	GH08J089754,GH08J089718,GH08J089736,GH08J089753,GH08J089725	605.974849743039,11.7115672010669,13.9443836227117,4.58324184220061,31.8870143657252	Antisense	90769975	90769955	20	ENSG00000251136-RIPK2
STK3	ENSG00000104375	13	-	99413631	99955055	0.505	Ful,JQ1	protein_coding	chr8	99951242	99964186	chr8	ENSG00000271930	99955823	99956326	+	Ful,JQ1	-1.044	1	GH08J098939	602.684	Antisense	99955055	99955823	-768	ENSG00000271930-STK3
C19orf44	ENSG00000105072	9	+	16607122	16632163	-1.72	JQ1	protein_coding	chr19	16651611	16654812	chr19	ENSG00000269399	16653434	16655625	-	JQ1	0.793	2	GH19J016540	19.2352	Antisense	16607122	16655625	-48503	ENSG00000269399-C19orf44
SLC1A5	ENSG00000105281	8	-	47278140	47291851	-0.127	Tam,Ful,JQ1	protein_coding	chr19	47745802	47748293	chr19	LncRNA1669	47744698	47746507	-	JQ1	-0.842	1	GH19J047242	33.8518	Sense	47291851	47746507	-454656	LncRNA1669-SLC1A5
CCDC9	ENSG00000105321	12	+	47759237	47775210	0.213	JQ1	protein_coding	chr19	4.77454e+31	4.77456e+31	chr19	LncRNA1669	47744698	47746507	-	JQ1	-0.842	1	GH19J047243,GH19J047244,GH19J047242,GH19J047245	13.218030660157,13.218030660157,68.4802278536467,20.9684062449248	Antisense	47759237	47746507	12730	LncRNA1669-CCDC9
BBC3	ENSG00000105327	4	-	47724081	47736023	0.379	Ful	protein_coding	chr19	47745802	47748293	chr19	LncRNA1669	47744698	47746507	-	JQ1	-0.842	1	GH19J047242	601.874	Sense	47736023	47746507	-10484	LncRNA1669-BBC3
DENND3	ENSG00000105339	23	+	142127377	142205907	0.421	Ful,JQ1	protein_coding	chr8	142065101	142070514	chr8	ENSG00000253266	142065389	142070695	+	Ful,JQ1	-1.696	5	GH08J141055	11.2749	Sense	142127377	142065389	61988	ENSG00000253266-DENND3
CYTH2	ENSG00000105443	12	+	48972289	48985571	0.515	Ful,JQ1	protein_coding	chr19	49015857	49017658	chr19	ENSG00000269814	49016464	49016917	-	JQ1	-1.246	1	GH19J048514	10.9335	Antisense	48972289	49016917	-44628	ENSG00000269814-CYTH2
RNF32	ENSG00000105982	10	+	156432975	156469824	-0.874	JQ1	protein_coding	chr7	1.56395e+116	1.56397e+116	chr7	ENSG00000182648	156264890	156433348	-	Ful,JQ1	-0.356	4	GH07J156602,GH07J156604,GH07J156585,GH07J156619,GH07J156497,GH07J156614,GH07J156576,GH07J156638,GH07J156579,GH07J156523,GH07J156607,GH07J156618,GH07J156515	11.2161787079265,11.1896591211492,10.6919955629684,12.2623749920984,2.81869426359064,13.773203452825,10.6731692770612,600.665628627291,10.6731692770612,23.6995545423769,11.4529365453205,11.7507576054616,1.37333992228827	Antisense	156432975	156433348	-373	ENSG00000182648-RNF32
NRF1	ENSG00000106459	12	+	129251555	129396922	0.527	JQ1	protein_coding	chr7	1.2925e+17	1.29254e+17	chr7	ENSG00000273329	129244389	129251471	-	JQ1	-0.368	1	GH07J129610,GH07J129608	615.146373784949,5.1751181437058	Antisense	129251555	129251471	84	ENSG00000273329-NRF1
MRPL32	ENSG00000106591	3	+	42971799	42988557	-0.108	Tam,Ful,JQ1	protein_coding	chr7	43011801	43013904	chr7	ENSG00000232006	42993734	43153530	-	JQ1	-0.806	6	GH07J042972	10.6279	Antisense	42971799	43153530	-181731	ENSG00000232006-MRPL32
GATA3	ENSG00000107485	6	+	8095567	8117161	0.245	Ful	protein_coding	chr10	8.0907e+20	8.10703e+20	chr10	ENSG00000232638	8093504	8095047	+	Tam,Ful,JQ1	0.222	3	GH10J008051,GH10J008051,GH10J008045	605.867328590965,605.867328590965,600.665628627291	Sense	8095567	8093504	2063	ENSG00000232638-GATA3
CCSER2	ENSG00000107771	11	+	86088342	86278273	0.707	JQ1	protein_coding	chr10	8603935786052950	8604035786057480	chr10	ENSG00000229404	86039736	86054415	+	JQ1	-1.395	6	GH10J084279,GH10J084293	16.7057223111949,12.4117245593739	Sense	86088342	86039736	48606	ENSG00000229404-CCSER2
KAZALD1	ENSG00000107821	5	+	102821598	102827888	-1.628	JQ1	protein_coding	chr10	102819157	102828757	chr10	ENSG00000273162	102819786	102820762	-	JQ1	-0.733	1	GH10J101059	600.666	Antisense	102821598	102820762	836	ENSG00000273162-KAZALD1
DKK1	ENSG00000107984	4	+	54074056	54077802	-1.496	JQ1	protein_coding	chr10	54199385	54216165	chr10	ENSG00000231131	54210634	54230293	-	JQ1	-2.033	4	GH10J052439	2.20746	Antisense	54074056	54230293	-156237	ENSG00000231131-DKK1
DHX40	ENSG00000108406	18	+	57642886	57685706	-0.238	JQ1	protein_coding	chr17	57693640	57701762	chr17	ENSG00000273702	57695914	57697075	-	Ful,JQ1	0.257	1	GH17J059616	19.6207	Antisense	57642886	57697075	-54189	ENSG00000273702-DHX40
AKAP10	ENSG00000108599	15	-	19807615	19881656	-0.358	JQ1	protein_coding	chr17	2.01129e+47	2.01154e+47	chr17	ENSG00000263494	20088395	20226286	+	JQ1	16.455	2	GH17J020207,GH17J020215,GH17J020222,GH17J020244,GH17J020213,GH17J020188	33.1625660946019,27.0403626170954,32.9661056822819,32.4663258866341,32.5239741509838,24.9220111489965	Antisense	19881656	20088395	-206739	ENSG00000263494-AKAP10
DLX4	ENSG00000108813	4	+	48046334	48052321	0.09	Tam,Ful,JQ1	protein_coding	chr17	47963116	47969235	chr17	ENSG00000248954	47964961	47978257	+	JQ1	-2.432	5	GH17J049885	12.8787	Sense	48046334	47964961	81373	ENSG00000248954-DLX4
USP46	ENSG00000109189	11	-	53457138	53525502	-0.448	JQ1	protein_coding	chr4	53523201	53527168	chr4	ENSG00000248866	53525573	53527835	+	JQ1	-0.629	2	GH04J052657	612.043	Antisense	53525502	53525573	-71	ENSG00000248866-USP46
ZNF330	ENSG00000109445	10	+	142142041	142155851	0.018	Tam,Ful,JQ1	protein_coding	chr4	142249276	142251387	chr4	ENSG00000248810	142240604	142253772	-	JQ1	1.796	3	GH04J141328	8.72681	Antisense	142142041	142253772	-111731	ENSG00000248810-ZNF330
FRG1	ENSG00000109536	9	+	190861943	190884359	0.306	JQ1	protein_coding	chr4	1.90861e+26	1.90865e+26	chr4	ENSG00000245685	190701490	190861426	-	JQ1	-1.72	4	GH04J189940,GH04J189788,GH04J189782	629.304088367232,1.81241598048235,6.40844007514115	Antisense	190861943	190861426	517	ENSG00000245685-FRG1
DHX15	ENSG00000109606	14	-	24519064	24586173	-0.47	JQ1	protein_coding	chr4	24659224	24667038	chr4	ENSG00000261121	24661479	24673191	+	JQ1	1.154	2	GH04J024657	23.6206	Antisense	24586173	24661479	-75306	ENSG00000261121-DHX15
FBXW7	ENSG00000109670	13	-	153242410	153457253	0.66	JQ1	protein_coding	chr4	153454152	153459725	chr4	ENSG00000268471	153457416	153460415	+	JQ1	-0.611	1	GH04J152533	600.666	Antisense	153457253	153457416	-163	ENSG00000268471-FBXW7
DTX4	ENSG00000110042	9	+	58938903	58976060	-0.979	JQ1	protein_coding	chr11	58908673	58914079	chr11	ENSG00000245571	58897606	58910488	-	Ful	0.411	5	GH11J059141	5.10226	Antisense	58938903	58910488	28415	ENSG00000245571-DTX4
DDX6	ENSG00000110367	16	-	118620034	118661858	-0.321	JQ1	protein_coding	chr11	118658175	118664709	chr11	ENSG00000278376	118661963	118663846	+	JQ1	-0.78	1	GH11J118787	606.71	Antisense	118661858	118661963	-105	ENSG00000278376-DDX6
PSMD9	ENSG00000110801	7	+	122326637	122356203	0.286	JQ1	protein_coding	chr12	122221659	122246137	chr12	ENSG00000212694	122233173	122241812	-	JQ1	-1.007	7	GH12J121783	23.3677	Antisense	122326637	122241812	84825	ENSG00000212694-PSMD9
BCL7A	ENSG00000110987	6	+	122457328	122499948	-0.352	JQ1	protein_coding	chr12	122449507	122452506	chr12	ENSG00000255856	122445340	122457969	-	JQ1	-0.493	2	GH12J122011	6.26934	Antisense	122457328	122457969	-641	ENSG00000255856-BCL7A
LTBR	ENSG00000111321	10	+	6484211	6500733	-1.257	JQ1	protein_coding	chr12	6500368	6504365	chr12	ENSG00000256433	6503071	6505314	+	JQ1	-2.12	3	GH12J006391	30.8412	Sense	6484211	6503071	-18860	ENSG00000256433-LTBR
COPZ1	ENSG00000111481	10	+	54694986	54745633	-0.11	JQ1	protein_coding	chr12	54365605	54428586	chr12	ENSG00000260597	54413694	54416373	+	JQ1	-1.034	1	GH12J053971	11.4439	Sense	54694986	54413694	281292	ENSG00000260597-COPZ1
COPS7A	ENSG00000111652	8	+	6832907	6841041	-0.231	JQ1	protein_coding	chr12	6851767	6852966	chr12	ENSG00000269892	6852151	6852807	+	Tam	-2.473	1	GH12J006743	8.00884	Sense	6832907	6852151	-19244	ENSG00000269892-COPS7A
CHPT1	ENSG00000111666	10	+	102090725	102137918	-0.601	JQ1	protein_coding	chr12	102089008	102095923	chr12	ENSG00000274560	102089780	102090228	-	JQ1	-2.986	1	GH12J101695	641.219	Antisense	102090725	102090228	497	ENSG00000274560-CHPT1
BTN3A3	ENSG00000111801	11	+	26440700	26453643	-1.497	JQ1	protein_coding	chr6	26520228	26524229	chr6	ENSG00000228223	26523678	26526807	+	JQ1	-1.765	1	GH06J026520	5.58344	Sense	26440700	26523678	-82978	ENSG00000228223-BTN3A3
MCM3	ENSG00000112118	17	-	52128807	52149679	-0.311	Tam,Ful,JQ1	protein_coding	chr6	52428791	52443242	chr6	ENSG00000225791	52442105	52448791	+	JQ1	-0.737	4	GH06J052563	20.3784	Antisense	52149679	52442105	-292426	ENSG00000225791-MCM3
TMEM30A	ENSG00000112697	7	-	75962640	75994684	0.406	Ful,JQ1	protein_coding	chr6	75989516	75996382	chr6	ENSG00000225793	75994730	76006719	+	JQ1	1.582	3	GH06J075280	607.02	Antisense	75994684	75994730	-46	ENSG00000225793-TMEM30A
SENP6	ENSG00000112701	24	+	76311225	76427997	-0.599	JQ1	protein_coding	chr6	76457635	76464613	chr6	LncRNA1202	76457087	76458801	-	Ful,JQ1	-0.663	1	GH06J075747	21.4704	Antisense	76311225	76458801	-147576	LncRNA1202-SENP6
VEGFA	ENSG00000112715	8	+	43737921	43754224	-0.462	Tam,Ful	protein_coding	chr6	4406174144038980	4406354944045570	chr6	LncRNA1802	44059756	44063777	-	JQ1	0.565	1	GH06J044094,GH06J044071	10.7553587706319,14.4164550551608	Antisense	43737921	44063777	-325856	LncRNA1802-VEGFA
BTN2A1	ENSG00000112763	9	+	26458150	26476849	-0.256	JQ1	protein_coding	chr6	26520228	26524229	chr6	ENSG00000228223	26523678	26526807	+	JQ1	-1.765	1	GH06J026520	16.6459	Sense	26458150	26523678	-65528	ENSG00000228223-BTN2A1
SEMA5A	ENSG00000112902	23	-	9035138	9546187	0.882	Ful	protein_coding	chr5	9543001	9548713	chr5	ENSG00000250786	9546312	9550721	+	Tam,Ful,JQ1	0.318	3	GH05J009542	603.437	Antisense	9546187	9546312	-125	ENSG00000250786-SEMA5A
AMOTL2	ENSG00000114019	10	-	134074716	134094321	0.399	JQ1	protein_coding	chr3	134066059	134095308	chr3	ENSG00000260633	134066130	134068075	-	JQ1	-2.314	1	GH03J134347	603.558	Sense	134094321	134068075	26246	ENSG00000260633-AMOTL2
GNAI2	ENSG00000114353	10	+	50263724	50296787	0.354	JQ1	protein_coding	chr3	50295267	50311432	chr3	ENSG00000230454	50297735	50300790	+	JQ1	-0.613	2	GH03J050257	12.5787	Sense	50263724	50297735	-34011	ENSG00000230454-GNAI2
FOXP1	ENSG00000114861	22	-	71003844	71633140	-0.226	Ful,JQ1	protein_coding	chr3	71624541	71635950	chr3	ENSG00000270562	71634094	71636560	+	JQ1	-2.716	1	GH03J071575	600.666	Antisense	71633140	71634094	-954	ENSG00000270562-FOXP1
INO80D	ENSG00000114933	11	-	206858445	206951027	-0.747	JQ1	protein_coding	chr2	206945799	206953125	chr2	ENSG00000227946	206949329	206951288	+	JQ1	-1.214	2	GH02J206081	619.993	Antisense	206951027	206949329	1698	ENSG00000227946-INO80D
LMAN2L	ENSG00000114988	9	-	97371666	97405801	-0.07	Tam,Ful,JQ1	protein_coding	chr2	97475552	97478536	chr2	ENSG00000273265	97477976	97479394	-	JQ1	-0.996	2	GH02J096811	18.6187	Sense	97405801	97479394	-73593	ENSG00000273265-LMAN2L
SLC35F5	ENSG00000115084	17	-	114462588	114514400	0.299	Ful,JQ1	protein_coding	chr2	114460306	114461840	chr2	ENSG00000227359	114435279	114461655	-	JQ1	2.094	3	GH02J113702	14.6283	Sense	114514400	114461655	52745	ENSG00000227359-SLC35F5
ACTR3	ENSG00000115091	12	+	114647537	114720173	-0.231	JQ1	protein_coding	chr2	114457381	114458149	chr2	ENSG00000227359	114435279	114461655	-	JQ1	2.094	3	GH02J113699	7.80885	Antisense	114647537	114461655	185882	ENSG00000227359-ACTR3
EFEMP1	ENSG00000115380	12	-	56093102	56151274	0.742	Tam,Ful	protein_coding	chr2	5.61815e+55	5.61817e+55	chr2	ENSG00000272180	56179293	56408787	+	JQ1	2.456	7	GH02J055954,GH02J055965,GH02J056008,GH02J056012,GH02J055991,GH02J055961,GH02J055957	12.0317967143186,11.1128987999127,10.506674793159,11.9873174878706,10.4534748059683,11.7374514202695,11.7552591198124	Antisense	56151274	56179293	-28019	ENSG00000272180-EFEMP1
GGCX	ENSG00000115486	15	-	85771846	85788670	0.286	JQ1	protein_coding	chr2	85763444	85770322	chr2	LncRNA790	85764503	85766182	-	JQ1	-1.628	1	GH02J085536	17.5885	Sense	85788670	85766182	22488	LncRNA790-GGCX
ST3GAL5	ENSG00000115525	10	-	86066267	86116137	-1.01	JQ1	protein_coding	chr2	86113062	86118254	chr2	ENSG00000232504	86116403	86118103	+	JQ1	-2.178	2	GH02J085885	610.517	Antisense	86116137	86116403	-266	ENSG00000232504-ST3GAL5
NOL10	ENSG00000115761	21	-	10710892	10830101	-0.366	Ful,JQ1	protein_coding	chr2	10828126	10831526	chr2	ENSG00000243819	10830470	10832225	+	JQ1	-0.786	1	GH02J010688	607.205	Antisense	10830101	10830470	-369	ENSG00000243819-NOL10
RND3	ENSG00000115963	6	-	151324709	151395525	0.661	Tam,Ful,JQ1	protein_coding	chr2	151474116	151484885	chr2	ENSG00000232359	151451616	151476581	-	JQ1	10.779	2	GH02J150617	8.29826	Sense	151395525	151476581	-81056	ENSG00000232359-RND3
RALGPS2	ENSG00000116191	20	+	178694300	178889238	-0.244	Ful,JQ1	protein_coding	chr1	178509338	178514928	chr1	ENSG00000213057	178511887	178518024	+	JQ1	-1.069	3	GH01J178540	4.96622	Sense	178694300	178511887	182413	ENSG00000213057-RALGPS2
ICMT	ENSG00000116237	6	-	6281253	6296032	0.11	JQ1	protein_coding	chr1	62933356298097	62970616302785	chr1	ENSG00000225077	6296300	6299504	+	JQ1	-0.796	5	GH01J006233,GH01J006238	618.882904529142,5.16725741438159	Antisense	6296032	6296300	-268	ENSG00000225077-ICMT
RHOU	ENSG00000116574	3	+	228870824	228882416	-0.455	Ful,JQ1	protein_coding	chr1	229226949	229231746	chr1	ENSG00000236975	229228562	229230652	-	JQ1	-2.937	2	GH01J229091	2.91258	Antisense	228870824	229230652	-359828	ENSG00000236975-RHOU
CD58	ENSG00000116815	6	-	117057157	117113661	-0.344	JQ1	protein_coding	chr1	117034555	117040996	chr1	ENSG00000224950	117035638	117041834	-	JQ1	0.722	2	GH01J116491	27.4939	Sense	117113661	117041834	71827	ENSG00000224950-CD58
SLC2A1	ENSG00000117394	10	-	43391052	43424530	-1.095	Ful	protein_coding	chr1	4341480943431120	4343029943434010	chr1	ENSG00000227533	43424720	43449029	+	Tam	1.119	4	GH01J042949,GH01J042965	617.552222796356,3.52014152351981	Antisense	43424530	43424720	-190	ENSG00000227533-SLC2A1
SLC19A2	ENSG00000117479	6	-	169433147	169455241	-0.785	Tam,Ful	protein_coding	chr1	169451238	169457638	chr1	ENSG00000213062	169455314	169456224	+	Tam,Ful,JQ1	-0.815	1	GH01J169482	600.666	Antisense	169455241	169455314	-73	ENSG00000213062-SLC19A2
ELL2	ENSG00000118985	12	-	95220802	95297775	1.161	JQ1	protein_coding	chr5	95192157	95202743	chr5	ENSG00000236882	95187936	95195837	+	JQ1	1.309	4	GH05J095856	7.43745	Antisense	95297775	95187936	109839	ENSG00000236882-ELL2
BSPRY	ENSG00000119411	6	+	116111821	116133513	-0.375	JQ1	protein_coding	chr9	116435682	116440279	chr9	ENSG00000227482	116413236	116445135	+	JQ1	-1.02	3	GH09J113673	5.23224	Sense	116111821	116413236	-301415	ENSG00000227482-BSPRY
NRDE2	ENSG00000119720	14	-	90742580	90798481	-1.146	JQ1	protein_coding	chr14	90846656	90852490	chr14	ENSG00000275198	90849709	90854317	+	JQ1	-0.424	1	GH14J090380	10.8729	Antisense	90798481	90849709	-51228	ENSG00000275198-NRDE2
PYROXD2	ENSG00000119943	16	-	100143322	100174941	-0.322	JQ1	protein_coding	chr10	100120347	100121952	chr10	LncRNA177	100121010	100121293	+	JQ1	-1.335	3	GH10J098360	13.7945	Antisense	100174941	100121010	53931	LncRNA177-PYROXD2
DUSP4	ENSG00000120875	5	-	29190581	29208185	-0.864	JQ1	protein_coding	chr8	29384770	29388499	chr8	ENSG00000253632	29384829	29387840	+	Tam,Ful,JQ1	-17.872	2	GH08J029527	11.6067	Antisense	29208185	29384829	-176644	ENSG00000253632-DUSP4
ZNF706	ENSG00000120963	6	-	102190106	102218421	0.173	JQ1	protein_coding	chr8	1.02181e+26	1.02181e+26	chr8	ENSG00000261087	102179033	102181857	-	JQ1	2.883	1	GH08J101169,GH08J101168,GH08J101162	11.2069298615236,11.5028832204562,5.58361820807872	Sense	102218421	102181857	36564	ENSG00000261087-ZNF706
AKAP1	ENSG00000121057	12	+	55162453	55198710	-0.588	Tam,Ful	protein_coding	chr17	55159430	55167070	chr17	ENSG00000263004	55155659	55162385	-	Ful,JQ1	0.478	3	GH17J057082	609.26	Antisense	55162453	55162385	68	ENSG00000263004-AKAP1
TBX2	ENSG00000121068	7	+	59477257	59486827	-0.191	Ful,JQ1	protein_coding	chr17	59470778	59494910	chr17	ENSG00000187013	59489112	59490641	+	Tam,Ful,JQ1	-0.539	1	GH17J061393	612.663	Sense	59477257	59489112	-11855	ENSG00000187013-TBX2
PDZRN3	ENSG00000121440	10	-	73431584	73674091	-0.38	JQ1	protein_coding	chr3	73875939	73878350	chr3	ENSG00000242741	73857752	73952017	+	JQ1	-0.819	4	GH03J073826	9.75509	Antisense	73674091	73857752	-183661	ENSG00000242741-PDZRN3
UBL3	ENSG00000122042	5	-	30338508	30424821	0.212	Ful,JQ1	protein_coding	chr13	3.06795e+23	3.06797e+23	chr13	ENSG00000224511	30677315	30683012	-	Ful	1.764	2	GH13J030105,GH13J030107,GH13J030103	11.0433379254712,11.126888737967,11.0433379254712	Sense	30424821	30683012	-258191	ENSG00000224511-UBL3
ANXA11	ENSG00000122359	17	-	81910645	81965328	-0.312	JQ1	protein_coding	chr10	81952648	81969557	chr10	ENSG00000237523	81967466	81979413	+	JQ1	-1.845	2	GH10J080192	609.806	Antisense	81965328	81967466	-2138	ENSG00000237523-ANXA11
ZMIZ2	ENSG00000122515	20	+	44788180	44809477	0.36	JQ1	protein_coding	chr7	44834799	44839200	chr7	LncRNA1262	44834797	44835979	-	JQ1	-0.87	1	GH07J044795	19.1434	Antisense	44788180	44835979	-47799	LncRNA1262-ZMIZ2
EEPD1	ENSG00000122547	9	+	36192758	36341152	1.156	JQ1	protein_coding	chr7	36122011	36122210	chr7	ENSG00000205745	36118694	36125346	+	Tam,JQ1	-24.528	2	GH07J036082	4.53051	Sense	36192758	36118694	74064	ENSG00000205745-EEPD1
P4HA1	ENSG00000122884	15	-	74766975	74856732	0.44	JQ1	protein_coding	chr10	74853158	74857840	chr10	ENSG00000272630	74857802	74861055	-	JQ1	0.947	2	GH10J073094	600.666	Sense	74856732	74861055	-4323	ENSG00000272630-P4HA1
HOXC13	ENSG00000123364	2	+	54332535	54340328	-0.203	JQ1	protein_coding	chr12	54365605	54428586	chr12	ENSG00000260597	54413694	54416373	+	JQ1	-1.034	1	GH12J053971	13.558	Sense	54332535	54413694	-81159	ENSG00000260597-HOXC13
HOXC12	ENSG00000123407	2	+	54348618	54352740	-2.293	JQ1	protein_coding	chr12	54365605	54428586	chr12	ENSG00000260597	54413694	54416373	+	JQ1	-1.034	1	GH12J053971	15.1101	Sense	54348618	54413694	-65076	ENSG00000260597-HOXC12
SNX21	ENSG00000124104	6	+	44462449	44471914	-0.29	Ful,JQ1	protein_coding	chr20	44561639	44568134	chr20	LncRNA1709	44561744	44562965	-	Ful,JQ1	0.73	1	GH20J045933	27.8642	Antisense	44462449	44562965	-100516	LncRNA1709-SNX21
NCOA3	ENSG00000124151	23	+	46130601	46285621	0.428	Tam,Ful,JQ1	protein_coding	chr20	46065145	46070919	chr20	LncRNA875	46067965	46068079	-	JQ1	-0.391	3	GH20J047436	3.63501	Antisense	46130601	46068079	62522	LncRNA875-NCOA3
PIGT	ENSG00000124155	16	+	44044717	44054884	0.168	JQ1	protein_coding	chr20	4.40722e+23	4.40736e+23	chr20	ENSG00000277022	44063912	44076965	-	Ful,JQ1	0.122	2	GH20J045443,GH20J045440,GH20J045436	5.85233774054868,5.84198468141329,6.02995019985817	Antisense	44044717	44076965	-32248	ENSG00000277022-PIGT
CDH26	ENSG00000124215	18	+	58533471	58609066	-2.071	Tam,Ful,JQ1	protein_coding	chr20	58674856	58683903	chr20	ENSG00000228340	58662895	59102516	+	Ful,JQ1	-2.221	8	GH20J060101	1.20169	Sense	58533471	58662895	-129424	ENSG00000228340-CDH26
NAGK	ENSG00000124357	10	+	71291474	71306935	0.26	JQ1	protein_coding	chr2	71289816	71301653	chr2	ENSG00000272735	71294649	71295255	-	JQ1	2.234	1	GH02J071062	642.788	Antisense	71291474	71295255	-3781	ENSG00000272735-NAGK
MCEE	ENSG00000124370	5	-	71336814	71357369	-0.531	Ful,JQ1	protein_coding	chr2	71289816	71301653	chr2	ENSG00000272735	71294649	71295255	-	JQ1	2.234	1	GH02J071062	10.8389	Sense	71357369	71295255	62114	ENSG00000272735-MCEE
GRM4	ENSG00000124493	11	-	33989628	34123399	-0.232	Ful,JQ1	protein_coding	chr6	3.38498e+63	3.38504e+63	chr6	ENSG00000249346	33835283	33864691	-	Tam,Ful,JQ1	-3.006	3	GH06J033882,GH06J033874,GH06J033895,GH06J033885,GH06J033896,GH06J033894,GH06J033892,GH06J033879	10.7893880546318,10.4334473409277,10.8119451186953,10.3796719691966,10.8083625045861,10.8083625045861,10.8083625045861,10.7907578776735	Sense	34123399	33864691	258708	ENSG00000249346-GRM4
BTN2A2	ENSG00000124508	8	+	26383324	26395102	-0.765	JQ1	protein_coding	chr6	26520228	26524229	chr6	ENSG00000228223	26523678	26526807	+	JQ1	-1.765	1	GH06J026520	13.4102	Sense	26383324	26523678	-140354	ENSG00000228223-BTN2A2
WRNIP1	ENSG00000124535	7	+	2765648	2787186	0.03	Ful,JQ1	protein_coding	chr6	2979554	2993153	chr6	ENSG00000244041	2988201	2991407	+	JQ1	-1.65	3	GH06J002979	20.8204	Sense	2765648	2988201	-222553	ENSG00000244041-WRNIP1
SERPINB6	ENSG00000124570	8	-	2948393	2972090	-0.381	Ful,JQ1	protein_coding	chr6	2979554	2993153	chr6	ENSG00000244041	2988201	2991407	+	JQ1	-1.65	3	GH06J002979	13.8943	Antisense	2972090	2988201	-16111	ENSG00000244041-SERPINB6
NQO2	ENSG00000124588	10	+	2988221	3019996	0.635	JQ1	protein_coding	chr6	2979554	2993153	chr6	ENSG00000244041	2988201	2991407	+	JQ1	-1.65	3	GH06J002979	618.838	Sense	2988221	2988201	20	ENSG00000244041-NQO2
KLHL31	ENSG00000124743	3	-	53512699	53530506	-1.026	Ful	protein_coding	chr6	5.3611e+23	5.3612e+23	chr6	ENSG00000227885	53605547	53611820	-	JQ1	-1.307	3	GH06J053746,GH06J053744,GH06J053740	8.60410909309057,8.61173092898958,7.1668774804312	Sense	53530506	53611820	-81314	ENSG00000227885-KLHL31
RPP40	ENSG00000124787	8	-	4994966	5004297	-0.858	Tam,Ful	protein_coding	chr6	5036236	5037233	chr6	ENSG00000272142	5030206	5043683	+	Ful,JQ1	0.07	2	GH06J005036	11.3675	Antisense	5004297	5030206	-25909	ENSG00000272142-RPP40
EMC3	ENSG00000125037	8	-	10004221	10052800	0.269	JQ1	protein_coding	chr3	10050084	10053884	chr3	ENSG00000206567	10048102	10052893	-	Ful,JQ1	0.083	4	GH03J010008	600.666	Sense	10052800	10052893	-93	ENSG00000206567-EMC3
HS3ST3B1	ENSG00000125430	3	+	14204400	14252721	1.562	JQ1	protein_coding	chr17	14202117	14214244	chr17	ENSG00000266709	14207171	14208822	+	JQ1	2.808	1	GH17J014299	616.552	Sense	14204400	14207171	-2771	ENSG00000266709-HS3ST3B1
CCDC93	ENSG00000125633	24	-	118673054	118771709	0.63	JQ1	protein_coding	chr2	1.18599e+17	1.186e+17	chr2	ENSG00000236255	118591513	118599234	+	JQ1	2.494	3	GH02J117841,GH02J117835	18.2251257710993,19.2564001821998	Antisense	118771709	118591513	180196	ENSG00000236255-CCDC93
NRSN2	ENSG00000125841	6	+	327426	340304	-0.26	JQ1	protein_coding	chr20	288611	295643	chr20	LncRNA859	294179	295299	-	Ful	0.479	1	GH20J000307	14.5715	Antisense	327426	295299	32127	LncRNA859-NRSN2
RALY	ENSG00000125970	10	+	32581452	32696114	0.277	JQ1	protein_coding	chr20	32579406	32584407	chr20	ENSG00000228265	32570858	32582163	-	JQ1	0.604	3	GH20J033992	605.288	Antisense	32581452	32582163	-711	ENSG00000228265-RALY
TUBGCP3	ENSG00000126216	22	-	113139325	113242481	-0.564	JQ1	protein_coding	chr13	1.13339e+26	1.13349e+26	chr13	ENSG00000274922	113341083	113344129	-	JQ1	-1.512	1	GH13J112684,GH13J112604,GH13J112605	13.0558326841207,18.7994872593163,615.362093477242	Sense	113242481	113344129	-101648	ENSG00000274922-TUBGCP3
GFER	ENSG00000127554	3	+	2034208	2037750	-0.819	JQ1	protein_coding	chr16	2031601	2036145	chr16	ENSG00000261790	2034878	2040358	-	JQ1	-3.101	2	GH16J001981	613.831	Antisense	2034208	2040358	-6150	ENSG00000261790-GFER
SYNGR3	ENSG00000127561	4	+	2039661	2044276	-0.126	Tam,Ful,JQ1	protein_coding	chr16	2.0398e+34	2.04417e+34	chr16	ENSG00000261790	2034878	2040358	-	JQ1	-3.101	2	GH16J001989,GH16J001958,GH16J001990,GH16J001991,GH16J001988	600.665628627291,22.8381992617457,600.665628627291,600.665628627291,608.74371180278	Antisense	2039661	2040358	-697	ENSG00000261790-SYNGR3
ECHS1	ENSG00000127884	8	-	135175984	135187193	0.194	JQ1	protein_coding	chr10	135185305	135193905	chr10	ENSG00000274685	135188240	135188373	-	Tam,Ful,JQ1	15.882	1	GH10J133372	612.604	Sense	135187193	135188373	-1180	ENSG00000274685-ECHS1
TUBGCP6	ENSG00000128159	25	-	50656118	50683421	0.346	JQ1	protein_coding	chr22	50322048	50333344	chr22	ENSG00000278869	50326846	50327722	-	JQ1	-1.994	1	GH22J049927	5.31043	Sense	50683421	50327722	355699	ENSG00000278869-TUBGCP6
TPST2	ENSG00000128294	8	-	26921458	26992681	1.38	JQ1	protein_coding	chr22	2704320127036740	2704551827042960	chr22	ENSG00000225783	27042392	27072438	+	Ful	-1.504	6	GH22J026647,GH22J026640	20.0381948460655,19.9175204498291	Antisense	26992681	27042392	-49711	ENSG00000225783-TPST2
SPECC1	ENSG00000128487	15	+	19912657	20222339	0.433	JQ1	protein_coding	chr17	2.00921e+55	2.00947e+55	chr17	ENSG00000263494	20088395	20226286	+	JQ1	16.455	2	GH17J020188,GH17J020244,GH17J020246,GH17J020281,GH17J020247,GH17J020262,GH17J020285	10.8445314197607,10.7012494297908,10.7012494297908,10.8392831143085,10.7012494297908,10.8419525130565,10.8406529373502	Sense	19912657	20088395	-175738	ENSG00000263494-SPECC1
MYO1B	ENSG00000128641	31	+	192109911	192290115	0.491	Tam,Ful	protein_coding	chr2	192109127	192114658	chr2	ENSG00000227542	192093891	192110898	-	JQ1	-1.23	4	GH02J191245	600.666	Antisense	192109911	192110898	-987	ENSG00000227542-MYO1B
HOXD1	ENSG00000128645	2	+	177053307	177055688	-2.603	JQ1	protein_coding	chr2	177042063	177043728	chr2	ENSG00000226363	177042445	177043736	+	JQ1	-1.353	2	GH02J176177	12.6225	Sense	177053307	177042445	10862	ENSG00000226363-HOXD1
TWSG1	ENSG00000128791	7	+	9334765	9402418	0.719	JQ1	protein_coding	chr18	9.3194e+20	9.3248e+20	chr18	ENSG00000264964	9315192	9334439	-	JQ1	-0.625	3	GH18J009320,GH18J009329,GH18J009333	22.2061772261317,4.97205574686395,625.254162129736	Antisense	9334765	9334439	326	ENSG00000264964-TWSG1
EIF2AK4	ENSG00000128829	39	+	40226347	40327797	-0.344	Ful,JQ1	protein_coding	chr15	40329601	40333176	chr15	ENSG00000248508	40331512	40359491	+	JQ1	-0.639	4	GH15J040037	22.7208	Sense	40226347	40331512	-105165	ENSG00000248508-EIF2AK4
CGNL1	ENSG00000128849	19	+	57668165	57842925	0.34	Ful	protein_coding	chr15	57588761	57595399	chr15	ENSG00000247982	57592563	57599967	+	JQ1	0.863	3	GH15J057296	10.3082	Sense	57668165	57592563	75602	ENSG00000247982-CGNL1
DLL4	ENSG00000128917	11	+	41221538	41231237	2.399	JQ1	protein_coding	chr15	41197244	41200992	chr15	ENSG00000251161	41199009	41202535	+	JQ1	-1.119	2	GH15J040905	4.96905	Sense	41221538	41199009	22529	ENSG00000251161-DLL4
ILF3	ENSG00000129351	20	+	10764937	10803093	0.057	Ful,JQ1	protein_coding	chr19	10762330	10768077	chr19	ENSG00000267100	10762538	10764520	-	JQ1	-0.981	1	GH19J010651	676.568	Antisense	10764937	10764520	417	ENSG00000267100-ILF3
EPB41L4A	ENSG00000129595	23	-	111478138	111755013	-0.998	JQ1	protein_coding	chr5	111753097	111756697	chr5	ENSG00000278921	111755280	111756675	+	JQ1	-1.566	1	GH05J112417	618.304	Antisense	111755013	111755280	-267	ENSG00000278921-EPB41L4A
CDH15	ENSG00000129910	14	+	89238175	89261900	1.844	JQ1	protein_coding	chr16	89234809	89235008	chr16	ENSG00000205015	89232791	89235555	+	JQ1	-18.263	3	GH16J089168	13.435	Sense	89238175	89232791	5384	ENSG00000205015-CDH15
KLF16	ENSG00000129911	3	-	1852399	1863567	-0.173	Tam,Ful,JQ1	protein_coding	chr19	1872228	1877800	chr19	ENSG00000261526	1874870	1876168	-	JQ1	0.444	1	GH19J001872	600.41	Sense	1863567	1876168	-12601	ENSG00000261526-KLF16
ABHD17A	ENSG00000129968	6	-	1876809	1885546	0.275	JQ1	protein_coding	chr19	1872228	1877800	chr19	ENSG00000261526	1874870	1876168	-	JQ1	0.444	1	GH19J001872	5.34439	Sense	1885546	1876168	9378	ENSG00000261526-ABHD17A
BST2	ENSG00000130303	5	-	17513748	17516457	-0.575	JQ1	protein_coding	chr19	17513867	17519210	chr19	ENSG00000282851	17516503	17529713	+	JQ1	-0.928	5	GH19J017403	609.845	Antisense	17516457	17516503	-46	ENSG00000282851-BST2
SLC27A1	ENSG00000130304	13	+	17579578	17616977	0.388	JQ1	protein_coding	chr19	1.75985e+31	1.76021e+31	chr19	ENSG00000269439	17599799	17622698	-	JQ1	0.949	3	GH19J017487,GH19J017498,GH19J017499,GH19J017496	8.6549664200145,8.42393301986181,5.04259179949822,7.64261313967498	Antisense	17579578	17622698	-43120	ENSG00000269439-SLC27A1
TAF4	ENSG00000130699	15	-	60528525	60640866	0.218	JQ1	protein_coding	chr20	60638056	60643506	chr20	ENSG00000283078	60641886	60643493	+	JQ1	-1.299	1	GH20J062063	625.364	Antisense	60640866	60641886	-1020	ENSG00000283078-TAF4
ZNF236	ENSG00000130856	32	+	74534563	74682683	-0.738	JQ1	protein_coding	chr18	74516757	74519010	chr18	ENSG00000278107	74517107	74517692	-	JQ1	1.697	1	GH18J076805	5.78927	Antisense	74534563	74517692	16871	ENSG00000278107-ZNF236
RAB11FIP4	ENSG00000131242	16	+	29718642	29865236	0.455	JQ1	protein_coding	chr17	29885020	29890069	chr17	ENSG00000278546	29887151	29887592	+	JQ1	1.888	1	GH17J031558	5.83575	Sense	29718642	29887151	-168509	ENSG00000278546-RAB11FIP4
MGAT1	ENSG00000131446	4	-	180217541	180242652	0.634	JQ1	protein_coding	chr5	180255600	180260601	chr5	ENSG00000245060	180257957	180262726	+	JQ1	-0.701	3	GH05J180828	8.9108	Antisense	180242652	180257957	-15305	ENSG00000245060-MGAT1
C1orf159	ENSG00000131591	12	-	1017198	1051741	-0.497	JQ1	protein_coding	chr1	1067197	1073723	chr1	ENSG00000223823	1072397	1079436	+	JQ1	-1.224	3	GH01J001131	7.04984	Antisense	1051741	1072397	-20656	ENSG00000223823-C1orf159
PPFIA1	ENSG00000131626	29	+	70116806	70230509	0.546	JQ1	protein_coding	chr11	70115307	70118707	chr11	LncRNA270	70115298	70116606	-	JQ1	0.574	1	GH11J070269	653.72	Antisense	70116806	70116606	200	LncRNA270-PPFIA1
THOC6	ENSG00000131652	14	+	3074028	3077756	-0.378	JQ1	protein_coding	chr16	3053402	3062033	chr16	ENSG00000272079	3056121	3057389	+	Ful,JQ1	0.553	1	GH16J003003	22.1478	Sense	3074028	3056121	17907	ENSG00000272079-THOC6
TNS4	ENSG00000131746	13	-	38632080	38657849	-0.885	Tam,Ful,JQ1	protein_coding	chr17	3861214638612140	3862158538621580	chr17	LncRNA1630	38618212	38620215	+	Ful	-1.604	1	GH17J040455,GH17J040455	11.7869785611175,11.7869785611175	Antisense	38657849	38618212	39637	LncRNA1630-TNS4
FCRLA	ENSG00000132185	6	+	161676762	161684142	14.226	Tam,Ful	protein_coding	chr1	1.61699e+17	1.61701e+17	chr1	LncRNA69	161699937	161701570	+	JQ1	-1.694	1	GH01J161729,GH01J161733	16.6463331027549,17.0153750279351	Sense	161676762	161699937	-23175	LncRNA69-FCRLA
IGHMBP2	ENSG00000132740	15	+	68671310	68708070	-0.563	JQ1	protein_coding	chr11	6863706868639460	6863846968640860	chr11	ENSG00000250508	68638132	68642010	+	JQ1	-1.62	2	GH11J068869,GH11J068872	79.5874424356789,89.0115369792492	Sense	68671310	68638132	33178	ENSG00000250508-IGHMBP2
ZSWIM3	ENSG00000132801	2	+	44486256	44507761	0.4	Tam,Ful	protein_coding	chr20	44561639	44568134	chr20	LncRNA1709	44561744	44562965	-	Ful,JQ1	0.73	1	GH20J045933	22.1455	Antisense	44486256	44562965	-76709	LncRNA1709-ZSWIM3
OSER1	ENSG00000132823	6	-	42825136	42839431	0.39	JQ1	protein_coding	chr20	4.28444e+39	4.28446e+39	chr20	ENSG00000223891	42839600	42854667	+	Ful,JQ1	0.726	4	GH20J044217,GH20J044216,GH20J044206,GH20J044223,GH20J044215	600.665628627291,618.705329127791,619.958314424395,6.29803657388608,600.665628627291	Antisense	42839431	42839600	-169	ENSG00000223891-OSER1
PPP1R3D	ENSG00000132825	1	-	58511894	58515352	-0.346	Tam,Ful,JQ1	protein_coding	chr20	58629660	58634428	chr20	ENSG00000176659	58630980	58648008	+	Tam,Ful,JQ1	-2.595	4	GH20J060054	10.8329	Antisense	58515352	58630980	-115628	ENSG00000176659-PPP1R3D
ZMYM5	ENSG00000132950	8	-	20397622	20437776	0.357	JQ1	protein_coding	chr13	20434748	20439741	chr13	ENSG00000275964	20437998	20439188	+	Ful,JQ1	-0.082	1	GH13J019860	626.086	Antisense	20437776	20437998	-222	ENSG00000275964-ZMYM5
MPRIP	ENSG00000133030	24	+	16945859	17120993	0.127	Ful,JQ1	protein_coding	chr17	16889788	16895137	chr17	ENSG00000230969	16891643	16893491	+	Ful,JQ1	14.181	3	GH17J016986	10.4161	Sense	16945859	16891643	54216	ENSG00000230969-MPRIP
STARD13	ENSG00000133121	14	-	33677272	33924767	-0.61	Ful,JQ1	protein_coding	chr13	3.40571e+167	3.40581e+167	chr13	ENSG00000230490	33929343	34250905	-	JQ1	-1.108	6	GH13J033482,GH13J033389,GH13J033388,GH13J033547,GH13J033366,GH13J033540,GH13J033674,GH13J033409,GH13J033433,GH13J033528,GH13J033455,GH13J033438,GH13J033536,GH13J033401,GH13J033362,GH13J033441,GH13J033534,GH13J033511,GH13J033368,GH13J033355,GH13J033509	10.3646360424498,10.5965632709917,10.5965632709917,9.94316674532616,10.553185477524,10.1317323828448,600.665628627291,10.1426449783131,10.2134153083852,10.548429569428,10.3699535045799,10.3121583851623,10.5567890023495,10.7900301020092,10.9273102607038,10.3121583851623,10.5495184031278,10.6524314856101,10.553185477524,11.1561389476147,10.6524314856101	Sense	33924767	34250905	-326138	ENSG00000230490-STARD13
SLC39A11	ENSG00000133195	10	-	70642088	71088851	0.279	JQ1	protein_coding	chr17	7063576470596140	7063759570600530	chr17	ENSG00000227036	70319264	70636611	-	Tam,Ful,JQ1	-0.849	5	GH17J072639,GH17J072600	7.24318406899491,5.0408214254889	Sense	71088851	70636611	452240	ENSG00000227036-SLC39A11
TTC9	ENSG00000133985	3	+	71108504	71142077	-1	JQ1	protein_coding	chr14	7110271871106910	7110571671111510	chr14	ENSG00000259115	71060031	71107921	-	Ful,JQ1	-18.191	5	GH14J070636,GH14J070640	40.6056753902184,666.840194542886	Antisense	71108504	71107921	583	ENSG00000259115-TTC9
MED6	ENSG00000133997	9	-	71047974	71067384	-0.221	JQ1	protein_coding	chr14	71065717	71068517	chr14	ENSG00000259115	71060031	71107921	-	Ful,JQ1	-18.191	5	GH14J070599	607.662	Sense	71067384	71107921	-40537	ENSG00000259115-MED6
PTGFRN	ENSG00000134247	9	+	117452679	117532980	-0.317	Ful,JQ1	protein_coding	chr1	117419783	117422875	chr1	LncRNA46	117422640	117422698	+	JQ1	-1.683	3	GH01J116877	11.3999	Sense	117452679	117422640	30039	LncRNA46-PTGFRN
SLC38A2	ENSG00000134294	16	-	46751972	46766650	0.272	JQ1	protein_coding	chr12	46776001	46787190	chr12	ENSG00000275481	46782639	46785909	+	JQ1	-1.224	1	GH12J046382	10.0804	Antisense	46766650	46782639	-15989	ENSG00000275481-SLC38A2
SPOCD1	ENSG00000134668	16	-	32256023	32281652	-0.77	Ful,JQ1	protein_coding	chr1	32310997	32315950	chr1	ENSG00000203620	32307620	32321169	-	JQ1	0.441	2	GH01J031845	6.90799	Sense	32281652	32321169	-39517	ENSG00000203620-SPOCD1
DAGLA	ENSG00000134780	20	+	61447905	61514473	-0.996	JQ1	protein_coding	chr11	6.13659e+23	6.13717e+23	chr11	ENSG00000250230	61355966	61375022	+	JQ1	-2.235	4	GH11J061598,GH11J061607,GH11J061606	11.1060308395038,10.7586276787056,10.7586276787056	Sense	61447905	61355966	91939	ENSG00000250230-DAGLA
CARS2	ENSG00000134905	15	-	111293759	111365950	-0.209	Ful	protein_coding	chr13	111520952	111524994	chr13	ENSG00000255874	111516334	111522598	-	JQ1	-1.993	1	GH13J110868	14.2298	Sense	111365950	111522598	-156648	ENSG00000255874-CARS2
KRT7	ENSG00000135480	9	+	52626304	52645970	-0.111	Ful,JQ1	protein_coding	chr12	5.25905e+31	5.2613e+31	chr12	ENSG00000257137	52599340	52607367	-	JQ1	-2.889	4	GH12J052196,GH12J052180,GH12J052196,GH12J052221	33.5912416661918,16.3469463309087,33.5912416661918,13.1154840902749	Antisense	52626304	52607367	18937	ENSG00000257137-KRT7
GLUL	ENSG00000135821	8	-	182350839	182361341	0.308	JQ1	protein_coding	chr1	182052536	182059134	chr1	ENSG00000225982	182055686	182059247	+	Tam,Ful,JQ1	16.887	3	GH01J182084	15.7933	Antisense	182361341	182055686	305655	ENSG00000225982-GLUL
CKAP2	ENSG00000136108	9	+	53029564	53050763	0.611	JQ1	protein_coding	chr13	53027424	53031689	chr13	ENSG00000278238	53028910	53029466	-	JQ1	0.483	1	GH13J052453	647.748	Antisense	53029564	53029466	98	ENSG00000278238-CKAP2
GPNMB	ENSG00000136235	11	+	23275586	23314727	0.07	Ful,JQ1	protein_coding	chr7	23245019	23248220	chr7	ENSG00000226816	23245632	23247664	+	JQ1	-1.494	1	GH07J023205	12.8045	Sense	23275586	23245632	29954	ENSG00000226816-GPNMB
DBNL	ENSG00000136279	13	+	44084239	44109055	-0.172	JQ1	protein_coding	chr7	44080999	44087422	chr7	ENSG00000235314	44078770	44081905	+	JQ1	-0.557	2	GH07J044041	607.291	Sense	44084239	44078770	5469	ENSG00000235314-DBNL
CCM2	ENSG00000136280	10	+	45039074	45116068	0.231	JQ1	protein_coding	chr7	45022626	45027850	chr7	ENSG00000232956	45022622	45026560	-	Tam,Ful	-1.051	5	GH07J044983	21.0841	Antisense	45039074	45026560	12514	ENSG00000232956-CCM2
BIN1	ENSG00000136717	19	-	127805603	127864931	-0.927	JQ1	protein_coding	chr2	127782043	127784176	chr2	ENSG00000260634	127781828	127783299	-	JQ1	-18.284	1	GH02J127024	18.2955	Sense	127864931	127783299	81632	ENSG00000260634-BIN1
LRRC1	ENSG00000137269	14	+	53659295	53788919	0.139	Ful	protein_coding	chr6	5.36058e+23	5.3607e+23	chr6	ENSG00000227885	53605547	53611820	-	JQ1	-1.307	3	GH06J053740,GH06J053743,GH06J053744	7.41839272110284,11.6018766755039,8.31499584665236	Antisense	53659295	53611820	47475	ENSG00000227885-LRRC1
RIPK1	ENSG00000137275	11	+	3064225	3115421	0.369	Ful,JQ1	protein_coding	chr6	2979554	2993153	chr6	ENSG00000244041	2988201	2991407	+	JQ1	-1.65	3	GH06J002979	58.9418	Sense	3064225	2988201	76024	ENSG00000244041-RIPK1
FLOT1	ENSG00000137312	13	-	30695486	30710510	-0.017	Tam,Ful,JQ1	protein_coding	chr6	3078441930766000	3079088130769930	chr6	ENSG00000214894	30766431	30798436	-	Tam,JQ1	-1.058	2	GH06J030816,GH06J030798	13.9140360579961,22.8191971882711	Sense	30710510	30798436	-87926	ENSG00000214894-FLOT1
IER3	ENSG00000137331	2	-	30710976	30712331	0.12	Tam,Ful,JQ1	protein_coding	chr6	3.07844e+39	3.07909e+39	chr6	ENSG00000214894	30766431	30798436	-	Tam,JQ1	-1.058	2	GH06J030816,GH06J030802,GH06J030798,GH06J030810,GH06J030826	63.1926994808208,11.8993869969888,24.6558851213996,25.4693261488011,15.7127590318921	Sense	30712331	30798436	-86105	ENSG00000214894-IER3
RAB30	ENSG00000137502	6	-	82684175	82782965	-0.936	Tam,Ful,JQ1	protein_coding	chr11	8281504382779990	8281564282785520	chr11	ENSG00000246067	82783108	82817761	+	JQ1	-0.606	4	GH11J083104,GH11J083068	11.5032054260567,609.39978528723	Antisense	82782965	82783108	-143	ENSG00000246067-RAB30
RDX	ENSG00000137710	17	-	110045605	110167447	0.364	Tam,Ful	protein_coding	chr11	1.10243e+44	1.10246e+44	chr11	ENSG00000254416	110225855	110277124	+	JQ1	-3.169	3	GH11J110372,GH11J110362,GH11J110354,GH11J110378,GH11J110365	5.39158060270758,4.59249354676161,18.2529916557022,2.40859137828449,5.55485648048154	Antisense	110167447	110225855	-58408	ENSG00000254416-RDX
FDX1	ENSG00000137714	4	+	110300607	110335605	0.203	JQ1	protein_coding	chr11	1.10262e+107	1.10264e+107	chr11	ENSG00000254416	110225855	110277124	+	JQ1	-3.169	3	GH11J110391,GH11J110376,GH11J110405,GH11J110354,GH11J110378,GH11J110372,GH11J110365,GH11J110397,GH11J110362,GH11J110389,GH11J110367,GH11J110368	24.3262884986273,22.0793211982716,5.09044097123193,612.417648883181,30.7474006029382,22.9864481917814,7.22089605554278,29.4416770334916,7.19668963898755,25.123701631449,4.26986055851492,24.2093982026524	Sense	110300607	110225855	74752	ENSG00000254416-FDX1
THBS1	ENSG00000137801	22	+	39873280	39891667	-0.889	Tam,Ful,JQ1	protein_coding	chr15	39643002,39429603,39709202,39415602,39538403,39627132,39468703,39604841,39449850,39254202,39609149,39435777,39702104,39606955,39480003,39493887,39520403,39547094,39427424,39666202,39608202,39574893,39537602,39409529,39561203,39534186,39619186,39614002,39480003,39456854,39445403,39646202,39602603,39589959,39552003,39649402	39643601,39435200,39709401,39427400,39544920,39627473,39476400,39606400,39450601,39254601,39610144,39439400,39709001,39607810,39492318,39497401,39525721,39548800,39429409,39691600,39608601,39580600,39538201,39411779,39569200,39537005,39619513,39614801,39492318,39458428,39449600,39647201,39603400,39598045,39560600,39658800	chr15	ENSG00000259345	39157523	39719396	-	JQ1	-0.5	8	GH15J039350,GH15J039138,GH15J039417,GH15J039123,GH15J039247,GH15J039334,GH15J039176,GH15J039312,GH15J039157,GH15J038961,GH15J039316,GH15J039143,GH15J039410,GH15J039314,GH15J039188,GH15J039201,GH15J039228,GH15J039254,GH15J039135,GH15J039376,GH15J039317,GH15J039282,GH15J039245,GH15J039117,GH15J039269,GH15J039241,GH15J039326,GH15J039320,GH15J039188,GH15J039164,GH15J039153,GH15J039353,GH15J039310,GH1…	9.94725305297709,1.94978966719046,10.599206342644,10.4038010568266,9.96653109040688,17.3264750968056,14.7105241476351,23.7612497773086,10.5670529488297,9.92940181176544,12.2673990526405,9.96323312304155,10.5986092402924,9.27462106426906,10.3352253014673,1.66512168509455,3.37780581348651,9.74589704847087,10.5011772879657,15.328587345179,21.2270103525153,22.6845456955604,5.51718965366666,10.6214162…	Antisense	39873280	39719396	153884	ENSG00000259345-THBS1
PLCB2	ENSG00000137841	32	-	40570377	40600136	-2.531	JQ1	protein_coding	chr15	40336578	40348656	chr15	ENSG00000248508	40331512	40359491	+	JQ1	-0.639	4	GH15J040044	14.3771	Antisense	40600136	40331512	268624	ENSG00000248508-PLCB2
CYP19A1	ENSG00000137869	11	-	51500254	51630807	-18.19	JQ1	protein_coding	chr15	5160582351609710	5160932051612250	chr15	ENSG00000259306	51608038	51614193	+	JQ1	-1.794	3	GH15J051314,GH15J051317	45.4818939982226,600.372170383345	Antisense	51630807	51608038	22769	ENSG00000259306-CYP19A1
BCAR3	ENSG00000137936	14	-	94027347	94312706	-0.704	JQ1	protein_coding	chr1	94309901	94314360	chr1	ENSG00000260464	94312730	94314495	+	JQ1	-1.131	1	GH01J093844	600.666	Antisense	94312706	94312730	-24	ENSG00000260464-BCAR3
TTLL7	ENSG00000137941	28	-	84330711	84464833	0.556	Ful	protein_coding	chr1	8432572184289990	8432729084290180	chr1	ENSG00000233008	84041459	84326706	-	JQ1	-1.335	3	GH01J083860,GH01J083824	5.87003821087303,2.31019970088881	Sense	84464833	84326706	138127	ENSG00000233008-TTLL7
CYP1B1	ENSG00000138061	4	-	38294116	38337044	-0.998	JQ1	protein_coding	chr2	38417073	38422542	chr2	ENSG00000273006	38420490	38420771	+	Ful,JQ1	15.293	1	GH02J038189	18.5434	Antisense	38337044	38420490	-83446	ENSG00000273006-CYP1B1
LOXL4	ENSG00000138131	15	-	100007447	100028007	-1.962	Tam,Ful,JQ1	protein_coding	chr10	100120347	100121952	chr10	LncRNA177	100121010	100121293	+	JQ1	-1.335	3	GH10J098360	6.25186	Antisense	100028007	100121010	-93003	LncRNA177-LOXL4
STAT4	ENSG00000138378	24	-	191894302	192016322	1.275	Ful	protein_coding	chr2	1.92094e+26	1.92096e+26	chr2	ENSG00000227542	192093891	192110898	-	JQ1	-1.23	4	GH02J191230,GH02J191231,GH02J191233	12.0035066302026,18.0151216652508,17.999616792458	Sense	192016322	192110898	-94576	ENSG00000227542-STAT4
FASTKD1	ENSG00000138399	15	-	170386259	170430385	-0.694	JQ1	protein_coding	chr2	170439911	170443711	chr2	LncRNA819	170438889	170440236	-	JQ1	-0.59	1	GH02J169583	615.9	Sense	170430385	170440236	-9851	LncRNA819-FASTKD1
USP8	ENSG00000138592	20	+	50716577	50793280	0.13	JQ1	protein_coding	chr15	51170781	51174143	chr15	ENSG00000273674	51132072	51200796	-	Tam	1.341	5	GH15J050878	15.1121	Antisense	50716577	51200796	-484219	ENSG00000273674-USP8
SPPL2A	ENSG00000138600	15	-	50999506	51058005	0.14	JQ1	protein_coding	chr15	5.1146e+47	5.11481e+47	chr15	ENSG00000273674	51132072	51200796	-	Tam	1.341	5	GH15J050853,GH15J050857,GH15J050878,GH15J050886,GH15J050883,GH15J050876	7.19379014377956,8.11610047030637,6.70668326232658,6.24687867896416,16.4122899122593,8.65147904031646	Sense	51058005	51200796	-142791	ENSG00000273674-SPPL2A
PCDH10	ENSG00000138650	5	+	134070470	134129356	-2.33	JQ1	protein_coding	chr4	1.34058e+35	1.34058e+35	chr4	ENSG00000250241	133996466	134070271	-	JQ1	-1.745	9	GH04J133136,GH04J133146,GH04J133097,GH04J133129	7.1053035571156,600.665628627291,10.4239865703516,8.23936016788747	Antisense	134070470	134070271	199	ENSG00000250241-PCDH10
BBS7	ENSG00000138686	19	-	122745595	122791652	0.609	JQ1	protein_coding	chr4	122790155	122792355	chr4	ENSG00000261501	122791738	122794003	+	JQ1	0.61	1	GH04J121869	612.968	Antisense	122791652	122791738	-86	ENSG00000261501-BBS7
PPP3CA	ENSG00000138814	14	-	101944566	102269435	-0.77	JQ1	protein_coding	chr4	102265757	102272201	chr4	ENSG00000254531	102268937	102270040	+	JQ1	-0.638	2	GH04J101345	600.666	Antisense	102269435	102268937	498	ENSG00000254531-PPP3CA
RGS3	ENSG00000138835	26	+	116207011	116360018	-1.149	JQ1	protein_coding	chr9	1.16416e+44	1.16423e+44	chr9	ENSG00000227482	116413236	116445135	+	JQ1	-1.02	3	GH09J113653,GH09J113647,GH09J113668,GH09J113652,GH09J113669	12.5958075116835,11.3216532864483,11.2684279712858,10.95603300392,11.2675147559246	Sense	116207011	116413236	-206225	ENSG00000227482-RGS3
TARBP2	ENSG00000139546	9	+	53894705	53900215	-0.535	JQ1	protein_coding	chr12	54365605	54428586	chr12	ENSG00000260597	54413694	54416373	+	JQ1	-1.034	1	GH12J053971	9.74768	Sense	53894705	54413694	-518989	ENSG00000260597-TARBP2
SETD1B	ENSG00000139718	18	+	122242086	122270562	0.179	Tam	protein_coding	chr12	122221659	122246137	chr12	ENSG00000212694	122233173	122241812	-	JQ1	-1.007	7	GH12J121783	633.378	Antisense	122242086	122241812	274	ENSG00000212694-SETD1B
RHOF	ENSG00000139725	6	-	122215664	122241309	-0.165	Tam,Ful,JQ1	protein_coding	chr12	122221659	122246137	chr12	ENSG00000212694	122233173	122241812	-	JQ1	-1.007	7	GH12J121783	603.959	Sense	122241309	122241812	-503	ENSG00000212694-RHOF
TTC6	ENSG00000139865	31	+	38065052	38510647	0.119	Ful,JQ1	protein_coding	chr14	38035517	38037405	chr14	ENSG00000258414	38033252	38048330	+	JQ1	-0.65	2	GH14J037566	12.176	Sense	38065052	38033252	31800	ENSG00000258414-TTC6
FRMD6	ENSG00000139926	15	+	51955818	52197445	0.395	Tam,Ful,JQ1	protein_coding	chr14	5.19245e+159	5.19263e+159	chr14	ENSG00000258537	51921230	52066670	-	Tam,Ful	-17.543	4	GH14J051457,GH14J051461,GH14J051549,GH14J051532,GH14J051584,GH14J051543,GH14J051552,GH14J051597,GH14J051468,GH14J051577,GH14J051538,GH14J051516,GH14J051487,GH14J051581,GH14J051580,GH14J051575,GH14J051453,GH14J051562,GH14J051579,GH14J051574	10.6052300137155,11.467769175072,4.98273388875587,10.428287582477,9.89618122964997,5.18176201302958,600.210074656737,11.7654963490375,11.7211732013503,10.4163161057442,12.3010720798258,10.9927511577817,600.665628627291,17.5253349579591,10.4066922207841,19.8345620888407,10.6052300137155,6.0291213266682,10.4066922207841,10.4163161057442	Antisense	51955818	52066670	-110852	ENSG00000258537-FRMD6
SRP14	ENSG00000140319	6	-	40327940	40331389	0.129	JQ1	protein_coding	chr15	4.03532e+31	4.03542e+31	chr15	ENSG00000248508	40331512	40359491	+	JQ1	-0.639	4	GH15J040061,GH15J040037,GH15J040044,GH15J040062	11.8265122350437,616.538835076777,13.2076098144749,26.5622851608656	Antisense	40331389	40331512	-123	ENSG00000248508-SRP14
TSPAN3	ENSG00000140391	8	-	77336359	77376326	0.256	JQ1	protein_coding	chr15	77817544	77824141	chr15	ENSG00000259362	77817882	77826452	+	Ful,JQ1	-1.599	2	GH15J077526	16.2459	Antisense	77376326	77817882	-441556	ENSG00000259362-TSPAN3
TPM1	ENSG00000140416	10	+	63334831	63364114	-0.174	Tam,Ful,JQ1	protein_coding	chr15	63185999	63193710	chr15	ENSG00000259727	63188011	63191742	+	JQ1	-3.273	2	GH15J062893	16.6863	Sense	63334831	63188011	146820	ENSG00000259727-TPM1
USP3	ENSG00000140455	16	+	63796793	63886839	-0.237	JQ1	protein_coding	chr15	6.36994e+55	6.37014e+55	chr15	ENSG00000259459	63682335	63730519	+	Tam,Ful,JQ1	-1.713	7	GH15J063407,GH15J063401,GH15J063414,GH15J063402,GH15J063431,GH15J063420,GH15J063435	10.6102469452263,9.85045791594772,10.3132773937963,10.5676090717695,10.2133641340527,10.3201616326728,10.0629960239332	Sense	63796793	63682335	114458	ENSG00000259459-USP3
ADAMTS17	ENSG00000140470	22	-	100511794	100882210	1.745	JQ1	protein_coding	chr15	1.00886e+17	1.00886e+17	chr15	ENSG00000189419	100884662	100889860	-	JQ1	-2.337	2	GH15J100345,GH15J100349	600.665628627291,5.18319666184517	Sense	100882210	100889860	-7650	ENSG00000189419-ADAMTS17
POLG	ENSG00000140521	24	-	89859534	89878092	0.214	JQ1,Nutlin	protein_coding	chr15	8.99215e+159	8.99242e+159	chr15	ENSG00000255571	89904810	89941718	+	Tam,JQ1,Nutlin-3	-1.447	7	GH15J089378,GH15J089381,GH15J089383,GH15J089390,GH15J089387,GH15J089392,GH15J089388,GH15J089361,GH15J089386,GH15J089362,GH15J089362,GH15J089361,GH15J089378,GH15J089383,GH15J089381,GH15J089387,GH15J089386,GH15J089388,GH15J089390,GH15J089392	11.2505422197356,11.2312242024801,11.2312242024801,11.4544382287576,11.2188255477688,11.4544382287576,11.2188255477688,11.8847011172328,15.9751551305941,11.8847011172328,11.8847011172328,11.8847011172328,11.2505422197356,11.2312242024801,11.2312242024801,11.2188255477688,15.9751551305941,11.2188255477688,11.4544382287576,11.4544382287576	Antisense	89878092	89904810	-26718	ENSG00000255571-POLG
PARN	ENSG00000140694	24	-	14529558	14726585	-0.463	JQ1	protein_coding	chr16	1.44565e+23	1.44599e+23	chr16	ENSG00000260009	14456966	14464123	-	Ful,JQ1	-1.732	2	GH16J014362,GH16J014300,GH16J014321	15.0255791500322,36.4076031339096,13.5382695902502	Sense	14726585	14464123	262462	ENSG00000260009-PARN
ZFHX3	ENSG00000140836	10	-	72816784	73093597	-0.834	JQ1	protein_coding	chr16	7307978573079780	7309559773095590	chr16	ENSG00000272250	73094144	73094658	+	JQ1	-1.054	1	GH16J073045,GH16J073045	605.765999448054,605.765999448054	Antisense	73093597	73094144	-547	ENSG00000272250-ZFHX3
CDH11	ENSG00000140937	14	-	64977656	65160015	-2.624	JQ1	protein_coding	chr16	6532130465313100	6532170365320100	chr16	ENSG00000261742	65318402	65610203	-	JQ1	2.586	10	GH16J065287,GH16J065280	4.84798205902202,4.96420439133125	Sense	65160015	65610203	-450188	ENSG00000261742-CDH11
ZCCHC14	ENSG00000140948	14	-	87439852	87525651	0.522	Ful,JQ1	protein_coding	chr16	8.75172e+23	8.75276e+23	chr16	ENSG00000260750	87526161	87549241	+	JQ1	-2.993	4	GH16J087483,GH16J087495,GH16J087494	608.366147478569,5.49914226899749,600.665628627291	Antisense	87525651	87526161	-510	ENSG00000260750-ZCCHC14
RPS2	ENSG00000140988	7	-	2012053	2014861	0.291	JQ1	protein_coding	chr16	2008602	2016602	chr16	ENSG00000255198	2014960	2015510	+	JQ1	0.464	2	GH16J001958	606.625	Antisense	2014861	2014960	-99	ENSG00000255198-RPS2
NDUFB10	ENSG00000140990	4	+	2009509	2011976	-0.239	JQ1	protein_coding	chr16	2008602	2016602	chr16	ENSG00000255198	2014960	2015510	+	JQ1	0.464	2	GH16J001958	600.666	Sense	2009509	2014960	-5451	ENSG00000255198-NDUFB10
SCRN2	ENSG00000141295	8	-	45915058	45918699	-0.753	JQ1	protein_coding	chr17	4593976845941760	4594136645943160	chr17	ENSG00000264243	45940708	45942556	+	Tam,Ful,JQ1	14.256	2	GH17J047862,GH17J047864	20.4448058293146,25.8268126917213	Antisense	45918699	45940708	-22009	ENSG00000264243-SCRN2
CLTC	ENSG00000141367	32	+	57697219	57773671	0.138	Ful	protein_coding	chr17	57693640	57701762	chr17	ENSG00000273702	57695914	57697075	-	Ful,JQ1	0.257	1	GH17J059616	600.666	Antisense	57697219	57697075	144	ENSG00000273702-CLTC
GATA6	ENSG00000141448	7	+	19749404	19782491	0.557	Tam,Ful,JQ1	protein_coding	chr18	19743266	19779637	chr18	ENSG00000266010	19746859	19748929	-	JQ1	-1.682	4	GH18J022163	609.799	Antisense	19749404	19748929	475	ENSG00000266010-GATA6
SLC16A3	ENSG00000141526	5	+	80186273	80219005	-2.606	JQ1	protein_coding	chr17	80249172	80263846	chr17	ENSG00000260563	80251592	80252786	+	JQ1	-0.645	1	GH17J082291	21.7686	Sense	80186273	80251592	-65319	ENSG00000260563-SLC16A3
CSNK1D	ENSG00000141551	10	-	80196899	80231607	0.229	Tam,Ful,JQ1	protein_coding	chr17	80249172	80263846	chr17	ENSG00000260563	80251592	80252786	+	JQ1	-0.645	1	GH17J082291	62.8186	Antisense	80231607	80251592	-19985	ENSG00000260563-CSNK1D
CBX8	ENSG00000141570	5	-	77765931	77775482	0.277	JQ1	protein_coding	chr17	77800001	77800800	chr17	ENSG00000262772	77797251	77801503	+	JQ1	-1.429	3	GH17J079826	13.3329	Antisense	77775482	77797251	-21769	ENSG00000262772-CBX8
SECTM1	ENSG00000141574	5	-	80278900	80291950	-2.365	JQ1	protein_coding	chr17	80249172	80263846	chr17	ENSG00000260563	80251592	80252786	+	JQ1	-0.645	1	GH17J082291	16.4048	Antisense	80291950	80251592	40358	ENSG00000260563-SECTM1
IGFBP4	ENSG00000141753	4	+	38599702	38613983	-0.754	Tam,Ful,JQ1	protein_coding	chr17	3861214638612140	3862158538621580	chr17	LncRNA1631	38620324	38621457	+	Ful	-2.724	1	GH17J040455,GH17J040455	2.06398045675869,2.06398045675869	Sense	38599702	38620324	-20622	LncRNA1631-IGFBP4
MVB12A	ENSG00000141971	10	+	17516531	17544533	-0.549	JQ1	protein_coding	chr19	1.75296e+23	1.7532e+23	chr19	ENSG00000282851	17516503	17529713	+	JQ1	-0.928	5	GH19J017418,GH19J017411,GH19J017403	632.021988419964,8.61327740014951,630.229445300053	Sense	17516531	17516503	28	ENSG00000282851-MVB12A
SOD1	ENSG00000142168	5	+	33031935	33041244	0.257	JQ1	protein_coding	chr21	3303069133030460	3303431433030610	chr21	ENSG00000234509	33025906	33031813	-	JQ1	0.607	3	GH21J031658,GH21J031659	605.38760479671,600.665628627291	Antisense	33031935	33031813	122	ENSG00000234509-SOD1
URB1	ENSG00000142207	39	-	33683329	33765335	-0.078	Tam,Ful,JQ1	protein_coding	chr21	33762709	33766727	chr21	ENSG00000256073	33765439	33766269	+	JQ1	-0.441	1	GH21J032392	614.504	Antisense	33765335	33765439	-104	ENSG00000256073-URB1
LMTK3	ENSG00000142235	16	-	48988528	49016446	0.384	Tam,Ful	protein_coding	chr19	49015857	49017658	chr19	ENSG00000269814	49016464	49016917	-	JQ1	-1.246	1	GH19J048514	600.666	Sense	49016446	49016917	-471	ENSG00000269814-LMTK3
LMO4	ENSG00000143013	5	+	87794151	87814606	1.216	JQ1	protein_coding	chr1	87596939	87598683	chr1	ENSG00000267272	87595448	87634881	+	JQ1	2.722	4	GH01J087131	4.43281	Sense	87794151	87595448	198703	ENSG00000267272-LMO4
PI4KB	ENSG00000143393	13	-	151264273	151300191	0.112	Ful	protein_coding	chr1	151297119	151301327	chr1	ENSG00000273481	151300425	151300905	+	JQ1	-19.144	1	GH01J151324	613.525	Antisense	151300191	151300425	-234	ENSG00000273481-PI4KB
JTB	ENSG00000143543	5	-	153946745	153950164	-0.197	JQ1	protein_coding	chr1	153948266	153951644	chr1	ENSG00000272654	153950219	153951636	+	JQ1	-0.755	1	GH01J153975	600.666	Antisense	153950164	153950219	-55	ENSG00000272654-JTB
PLEKHA6	ENSG00000143850	27	-	204187979	204346793	-0.379	Ful,JQ1	protein_coding	chr1	204336530	204338928	chr1	ENSG00000280924	204337559	204338847	-	JQ1	-2.097	1	GH01J204366	6.8397	Sense	204346793	204338847	7946	ENSG00000280924-PLEKHA6
SPOPL	ENSG00000144228	11	+	139259371	139331117	-0.449	JQ1	protein_coding	chr2	1.39227e+62	1.39227e+62	chr2	ENSG00000228043	139175854	139259268	-	JQ1	-0.967	5	GH02J138469,GH02J138432,GH02J138500,GH02J138468,GH02J138473,GH02J138454,GH02J138424	10.9424188341108,11.0147053710575,620.255621156405,10.9424188341108,12.4161151750407,11.514837967767,10.6488343765832	Antisense	139259371	139259268	103	ENSG00000228043-SPOPL
RHBDD1	ENSG00000144468	9	+	227700297	227863931	-0.609	JQ1	protein_coding	chr2	227653327	227667117	chr2	ENSG00000272622	227664862	227675745	+	JQ1	-1.969	4	GH02J226788	621.92	Sense	227700297	227664862	35435	ENSG00000272622-RHBDD1
ACKR3	ENSG00000144476	2	+	237476430	237491001	-0.437	Tam,Ful,JQ1	protein_coding	chr2	237650844	237668443	chr2	ENSG00000232328	237642025	237663006	+	JQ1	-2.857	3	GH02J236742	2.24734	Sense	237476430	237642025	-165595	ENSG00000232328-ACKR3
PIK3R1	ENSG00000145675	16	+	67511548	67597649	-0.519	Ful,JQ1	protein_coding	chr5	67065090	67071031	chr5	ENSG00000249364	66675206	67101066	+	JQ1	-1.275	5	GH05J067769	1.69403	Sense	67511548	66675206	836342	ENSG00000249364-PIK3R1
MEGF10	ENSG00000145794	26	+	126626523	126801429	2.863	JQ1	protein_coding	chr5	1.26564e+17	1.26566e+17	chr5	ENSG00000283897	126550851	126565501	-	JQ1	-1.311	3	GH05J127228,GH05J127229	600.665628627291,600.665628627291	Antisense	126626523	126565501	61022	ENSG00000283897-MEGF10
ARHGAP26	ENSG00000145819	23	+	142149949	142608576	0.948	JQ1	protein_coding	chr5	142135567	142139364	chr5	ENSG00000236714	142125165	142140563	+	JQ1	1.79	4	GH05J142758	5.69188	Sense	142149949	142125165	24784	ENSG00000236714-ARHGAP26
G3BP1	ENSG00000145907	12	+	151150606	151192346	0.193	Ful,JQ1	protein_coding	chr5	1.51149e+17	1.51156e+17	chr5	ENSG00000275765	151149803	151151069	-	JQ1	-1.447	2	GH05J151769,GH05J151729	616.374695912321,11.1614373622611	Antisense	151150606	151151069	-463	ENSG00000275765-G3BP1
BOD1	ENSG00000145919	4	-	173034517	173043663	-0.577	Tam,Ful,JQ1	protein_coding	chr5	1.72988e+17	1.72993e+17	chr5	ENSG00000253768	172989481	173000202	+	Ful,JQ1	-3.224	3	GH05J173560,GH05J173574	10.6645844430225,5.11476892187436	Antisense	173043663	172989481	54182	ENSG00000253768-BOD1
FAM50B	ENSG00000145945	2	+	3849620	3851551	-0.729	JQ1	protein_coding	chr6	3904435	3907833	chr6	ENSG00000260604	3905154	3912213	-	Ful,JQ1	-0.8	1	GH06J003904	11.1843	Antisense	3849620	3912213	-62593	ENSG00000260604-FAM50B
ABT1	ENSG00000146109	3	+	26597180	26600278	-0.392	JQ1	protein_coding	chr6	26520228	26524229	chr6	ENSG00000228223	26523678	26526807	+	JQ1	-1.765	1	GH06J026520	29.1332	Sense	26597180	26523678	73502	ENSG00000228223-ABT1
MMS22L	ENSG00000146263	25	-	97590037	97731093	-0.68	JQ1	protein_coding	chr6	9.77289e+23	9.77321e+23	chr6	ENSG00000271860	97731179	98847748	+	Tam,JQ1	3.147	8	GH06J097281,GH06J097411,GH06J097306	608.581406363182,3.93222798770856,12.5344403874333	Antisense	97731093	97731179	-86	ENSG00000271860-MMS22L
EGFR	ENSG00000146648	28	+	55086714	55324313	0.026	Ful,JQ1	protein_coding	chr7	5.53172e+31	5.53173e+31	chr7	ENSG00000280890	55303658	55323328	-	Tam,Ful,JQ1	-17.565	4	GH07J055249,GH07J055252,GH07J055250,GH07J055253	11.0083022228428,11.0083022228428,11.0083022228428,1.68521242304032	Antisense	55086714	55323328	-236614	ENSG00000280890-EGFR
NOM1	ENSG00000146909	11	+	156742417	156765876	-0.626	Tam,Ful	protein_coding	chr7	1.56407e+17	1.56411e+17	chr7	ENSG00000182648	156264890	156433348	-	Ful,JQ1	-0.356	4	GH07J156614,GH07J157005	5.45503586312866,5.19961833246396	Antisense	156742417	156433348	309069	ENSG00000182648-NOM1
ZNF41	ENSG00000147124	5	-	47305278	47342345	-0.504	JQ1	protein_coding	chrX	47340799	47344800	chrX	ENSG00000196741	47342970	47344222	+	JQ1	-1.534	1	GH0XJ047482	600.666	Antisense	47342345	47342970	-625	ENSG00000196741-ZNF41
TACC1	ENSG00000147526	15	+	38585704	38710546	0.422	Tam,Ful	protein_coding	chr8	38409801	38409970	chr8	ENSG00000253361	38401170	38410198	-	JQ1	-1.56	3	GH08J038553	10.5095	Antisense	38585704	38410198	175506	ENSG00000253361-TACC1
NTMT1	ENSG00000148335	5	+	132371163	132398209	-0.269	Tam,Ful,JQ1	protein_coding	chr9	1.32087e+98	1.32088e+98	chr9	ENSG00000179082	132083295	132087184	+	JQ1	-1.544	2	GH09J129324,GH09J129346,GH09J129338,GH09J129342,GH09J129340,GH09J129348,GH09J129339,GH09J129347,GH09J129330,GH09J129579,GH09J129574	11.5764658794797,11.3339626439121,10.9350274254213,11.3339626439121,10.9350274254213,11.3375452580213,10.9350274254213,11.3339626439121,11.5772737238377,12.2024361402757,12.1552650545044	Sense	132371163	132083295	287868	ENSG00000179082-NTMT1
DPH7	ENSG00000148399	9	-	140449356	140473387	-0.279	Tam,Ful	protein_coding	chr9	1.40021e+17	1.40025e+17	chr9	LncRNA1437	140023111	140024679	-	JQ1	-0.277	1	GH09J137126,GH09J137221	46.9364983185091,13.4687506936663	Sense	140473387	140024679	448708	LncRNA1437-DPH7
HNMT	ENSG00000150540	7	+	138721590	138773930	-1.106	JQ1	protein_coding	chr2	1.38669e+44	1.3867e+44	chr2	ENSG00000234007	138636324	138683977	-	Tam	-19.909	2	GH02J137911,GH02J137892,GH02J137890,GH02J137888,GH02J137912	10.9547602312959,9.82180782729763,9.82180782729763,9.83970008226711,10.9547602312959	Antisense	138721590	138683977	37613	ENSG00000234007-HNMT
PRSS23	ENSG00000150687	5	+	86502101	86663952	-0.844	Tam,Ful,JQ1	protein_coding	chr11	8641464386419840	8641664286420240	chr11	ENSG00000254731	86414141	86425134	+	JQ1	-3.495	2	GH11J086703,GH11J086708	4.63433442552427,10.7672517271297	Sense	86502101	86414141	87960	ENSG00000254731-PRSS23
MIPOL1	ENSG00000151338	16	+	37667118	38021566	-0.389	JQ1	protein_coding	chr14	38035517	38037405	chr14	ENSG00000258414	38033252	38048330	+	JQ1	-0.65	2	GH14J037566	12.8747	Sense	37667118	38033252	-366134	ENSG00000258414-MIPOL1
KIN	ENSG00000151657	13	-	7792925	7829990	-0.323	JQ1	protein_coding	chr10	80907018090701	81070268107026	chr10	ENSG00000197308	8092413	8095447	-	Ful,JQ1	-0.223	3	GH10J008051,GH10J008051	44.4484322860287,44.4484322860287	Sense	7829990	8095447	-265457	ENSG00000197308-KIN
ZFP36L2	ENSG00000152518	2	-	43449541	43453748	-0.676	JQ1	protein_coding	chr2	43443918	43456930	chr2	ENSG00000279873	43454349	43455994	+	JQ1	-1.215	1	GH02J043216	600.666	Antisense	43453748	43454349	-601	ENSG00000279873-ZFP36L2
PLEKHH2	ENSG00000152527	30	+	43864412	43995126	0.527	Tam,Ful	protein_coding	chr2	43443918	43456930	chr2	ENSG00000279873	43454349	43455994	+	JQ1	-1.215	1	GH02J043216	15.2163	Sense	43864412	43454349	410063	ENSG00000279873-PLEKHH2
GPR180	ENSG00000152749	9	+	95254157	95286899	-0.323	JQ1	protein_coding	chr13	95358001	95366854	chr13	ENSG00000227640	95364970	95368500	+	JQ1	-1.668	2	GH13J094705	6.19997	Sense	95254157	95364970	-110813	ENSG00000227640-GPR180
BCL2L11	ENSG00000153094	6	+	111876955	111926024	0.747	JQ1	protein_coding	chr2	1.11977e+62	1.11978e+62	chr2	ENSG00000172965	111953927	112252677	-	JQ1	-1.306	6	GH02J111219,GH02J111196,GH02J111201,GH02J111449,GH02J111200,GH02J111209,GH02J111491	6.5456414780457,5.74557282048645,1.54125671038995,2.63033247351782,5.00312842731504,4.57600520983479,1.78898122469086	Antisense	111876955	112252677	-375722	ENSG00000172965-BCL2L11
ANAPC1	ENSG00000153107	48	-	112523848	112642267	-0.261	Ful	protein_coding	chr2	1.12185e+17	1.12199e+17	chr2	ENSG00000172965	111953927	112252677	-	JQ1	-1.306	6	GH02J111429,GH02J111415	39.1846693060043,13.6782124583351	Sense	112642267	112252677	389590	ENSG00000172965-ANAPC1
NR4A2	ENSG00000153234	8	-	157180944	157198860	-0.48	JQ1	protein_coding	chr2	157036655	157039912	chr2	ENSG00000226383	156868042	157111462	-	JQ1	-1.225	7	GH02J156180	1.38534	Sense	157198860	157111462	87398	ENSG00000226383-NR4A2
ZDHHC7	ENSG00000153786	10	-	85007787	85045141	0.384	Tam,Ful,JQ1	protein_coding	chr16	84961407	84964632	chr16	ENSG00000260340	84961959	84973209	+	JQ1	1.42	3	GH16J084927	25.0614	Antisense	85045141	84961959	83182	ENSG00000260340-ZDHHC7
KCTD15	ENSG00000153885	8	+	34286838	34306668	-1.502	JQ1	protein_coding	chr19	34394924	34398705	chr19	ENSG00000277013	34397257	34399296	+	Tam,Ful,JQ1	-0.334	1	GH19J033904	5.91839	Sense	34286838	34397257	-110419	ENSG00000277013-KCTD15
GAL3ST2	ENSG00000154252	4	+	242716240	242743623	-1.401	JQ1	protein_coding	chr2	242672415	242676016	chr2	LncRNA833	242671285	242673233	-	JQ1	-0.47	2	GH02J241734	6.55427	Antisense	242716240	242673233	43007	LncRNA833-GAL3ST2
DISP1	ENSG00000154309	8	+	222988406	223179337	0.467	Ful,JQ1	protein_coding	chr1	2.22997e+35	2.22997e+35	chr1	ENSG00000228106	222988364	223010726	+	JQ1	-0.761	5	GH01J222823,GH01J222822,GH01J222813,GH01J222827	600.44241771882,5.8357333133129,602.670455126872,6.78763278150114	Sense	222988406	222988364	42	ENSG00000228106-DISP1
CCSAP	ENSG00000154429	4	-	229456758	229479041	1.013	JQ1	protein_coding	chr1	229403707	229410544	chr1	ENSG00000177788	229394028	229406775	-	JQ1	-0.89	2	GH01J229267	11.4689	Sense	229479041	229406775	72266	ENSG00000177788-CCSAP
CCDC173	ENSG00000154479	9	-	170501935	170550943	-3.319	Tam,Ful,JQ1	protein_coding	chr2	170439911	170443711	chr2	LncRNA819	170438889	170440236	-	JQ1	-0.59	1	GH02J169583	15.6699	Sense	170550943	170440236	110707	LncRNA819-CCDC173
CXADR	ENSG00000154639	8	+	18884700	18965897	0.827	JQ1	protein_coding	chr21	1880852018813110	1881166218815510	chr21	ENSG00000232560	18811208	18821503	+	Tam,Ful,JQ1	17.766	4	GH21J017436,GH21J017440	6.08004395964042,7.23646750371304	Sense	18884700	18811208	73492	ENSG00000232560-CXADR
RABGEF1	ENSG00000154710	10	+	66147151	66276451	0.239	JQ1	protein_coding	chr7	66369988	66371386	chr7	ENSG00000273142	66367844	66371284	+	Ful,JQ1	0.002	1	GH07J066905	15.6539	Sense	66147151	66367844	-220693	ENSG00000273142-RABGEF1
CCDC144CP	ENSG00000154898	19	+	20224477	20306870	1.41	JQ1	pseudogene	chr17	20223713	20225713	chr17	ENSG00000263494	20088395	20226286	+	JQ1	16.455	2	GH17J020320	600.666	Sense	20224477	20088395	136082	ENSG00000263494-CCDC144CP
FBXL18	ENSG00000155034	7	-	5470966	5553429	0.368	Tam,Ful,JQ1	protein_coding	chr7	5456080	5471143	chr7	ENSG00000234432	5465908	5468558	-	JQ1	-0.936	1	GH07J005416	1.35279	Sense	5553429	5468558	84871	ENSG00000234432-FBXL18
KLF10	ENSG00000155090	4	-	103661007	103668130	-0.229	Ful,JQ1	protein_coding	chr8	103816193	103823829	chr8	ENSG00000253669	103817745	103822199	+	JQ1	-1.666	2	GH08J102803	13.1592	Antisense	103668130	103817745	-149615	ENSG00000253669-KLF10
AZIN1	ENSG00000155096	13	-	103838585	103906092	0.561	JQ1	protein_coding	chr8	103816193	103823829	chr8	ENSG00000253669	103817745	103822199	+	JQ1	-1.666	2	GH08J102803	5.4332	Antisense	103906092	103817745	88347	ENSG00000253669-AZIN1
SLC16A1	ENSG00000155380	5	-	113454469	113499635	-0.08	Tam,Ful,JQ1	protein_coding	chr1	113369203	113369427	chr1	ENSG00000215866	113362792	113393265	-	JQ1	1.301	7	GH01J112826	2.57362	Sense	113499635	113393265	106370	ENSG00000215866-SLC16A1
CNOT8	ENSG00000155508	8	+	154237113	154256353	-0.066	Tam,Ful,JQ1	protein_coding	chr5	154259269	154260065	chr5	LncRNA1146	154259523	154261792	-	Tam,Ful,JQ1	0.164	1	GH05J154879	17.6722	Antisense	154237113	154261792	-24679	LncRNA1146-CNOT8
FZD7	ENSG00000155760	1	+	202899310	202903160	1.22	JQ1	protein_coding	chr2	202895035	202904798	chr2	ENSG00000273209	202897493	202898260	-	JQ1	-2.484	1	GH02J202030	622.361	Antisense	202899310	202898260	1050	ENSG00000273209-FZD7
SCAF4	ENSG00000156304	20	-	33043346	33104388	0.206	Ful,JQ1	protein_coding	chr21	33030691	33034314	chr21	ENSG00000234509	33025906	33031813	-	JQ1	0.607	3	GH21J031658	18.4065	Sense	33104388	33031813	72575	ENSG00000234509-SCAF4
ZNF689	ENSG00000156853	4	-	30613879	30635333	-1.416	JQ1	protein_coding	chr16	30644727	30646889	chr16	LncRNA499	30645883	30646919	+	Tam,Ful	-0.365	1	GH16J030633	6.77741	Antisense	30635333	30645883	-10550	LncRNA499-ZNF689
NECAP2	ENSG00000157191	9	+	16767167	16786573	0.255	JQ1	protein_coding	chr1	16839201	16841896	chr1	ENSG00000261135	16841140	16842249	+	JQ1	-0.477	1	GH01J016512	5.04282	Sense	16767167	16841140	-73973	ENSG00000261135-NECAP2
LRP8	ENSG00000157193	20	-	53711217	53793742	-0.146	Tam,Ful,JQ1	protein_coding	chr1	53789698	53795073	chr1	ENSG00000225675	53793905	53802181	+	JQ1	-1.603	3	GH01J053324	606.174	Antisense	53793742	53793905	-163	ENSG00000225675-LRP8
SLC35B2	ENSG00000157593	4	-	44221833	44225291	-0.142	JQ1	protein_coding	chr6	44038981	44045573	chr6	ENSG00000231881	44041650	44045689	+	Ful	15.988	2	GH06J044071	21.3013	Antisense	44225291	44041650	183641	ENSG00000231881-SLC35B2
ZNF618	ENSG00000157657	15	+	116638562	116818871	-2.287	JQ1	protein_coding	chr9	116435682	116440279	chr9	ENSG00000227482	116413236	116445135	+	JQ1	-1.02	3	GH09J113673	4.28064	Sense	116638562	116413236	225326	ENSG00000227482-ZNF618
PSMG3	ENSG00000157778	3	-	1606966	1610641	-0.536	Tam,Ful,JQ1,Nutlin	protein_coding	chr7	1.61844e+27	1.62024e+27	chr7	ENSG00000230487	1609709	1629262	+	Tam,Ful,JQ1,Nutlin-3	0.517	6	GH07J001579,GH07J001565,GH07J001565,GH07J001579	7.07650687712801,606.795612365241,606.795612365241,7.07650687712801	Antisense	1610641	1609709	932	ENSG00000230487-PSMG3
CNNM4	ENSG00000158158	7	+	97426639	97477628	1.103	JQ1	protein_coding	chr2	97475552	97478536	chr2	ENSG00000273265	97477976	97479394	-	JQ1	-0.996	2	GH02J096811	11.6949	Antisense	97426639	97479394	-52755	ENSG00000273265-CNNM4
CLSTN2	ENSG00000158258	17	+	139654027	140296239	0.482	Tam,Ful,JQ1	protein_coding	chr3	139554043	139556442	chr3	ENSG00000251471	139556062	139578736	+	Ful,JQ1	-15.466	3	GH03J139835	4.33475	Sense	139654027	139556062	97965	ENSG00000251471-CLSTN2
F11R	ENSG00000158769	11	-	160965001	160991138	0.411	Ful,JQ1	protein_coding	chr1	1.60956e+17	1.60959e+17	chr1	LncRNA1519	160955474	160958847	-	Tam,Ful,JQ1	0.738	1	GH01J160986,GH01J160985	20.3583611910787,8.79618643284437	Sense	160991138	160958847	32291	LncRNA1519-F11R
DEDD	ENSG00000158796	8	-	161090764	161102478	-0.685	JQ1	protein_coding	chr1	160955591	160955790	chr1	LncRNA1519	160955474	160958847	-	Tam,Ful,JQ1	0.738	1	GH01J160985	21.6144	Sense	161102478	160958847	143631	LncRNA1519-DEDD
ITGB2	ENSG00000160255	17	-	46305868	46351904	-0.494	JQ1	protein_coding	chr21	46336141	46353716	chr21	ENSG00000183250	46352729	46359828	-	JQ1	-0.534	4	GH21J044916	606.063	Sense	46351904	46359828	-7924	ENSG00000183250-ITGB2
FAM207A	ENSG00000160256	6	+	46359925	46396904	-0.41	Tam,Ful	protein_coding	chr21	4633614146358710	4635371646361910	chr21	ENSG00000183250	46352729	46359828	-	JQ1	-0.534	4	GH21J044916,GH21J044938	606.593004385792,608.270527741403	Antisense	46359925	46359828	97	ENSG00000183250-FAM207A
LSS	ENSG00000160285	23	-	47608055	47648738	0.683	JQ1	protein_coding	chr21	47389801	47407678	chr21	ENSG00000274248	47394403	47394867	+	Tam,JQ1	-14.991	1	GH21J045970	6.09116	Antisense	47648738	47394403	254335	ENSG00000274248-LSS
PLCD3	ENSG00000161714	16	-	43186335	43210721	0.195	JQ1	protein_coding	chr17	43220517	43230110	chr17	ENSG00000276728	43224097	43225837	-	JQ1	-1.672	1	GH17J045143	5.63133	Sense	43210721	43225837	-15116	ENSG00000276728-PLCD3
CCNF	ENSG00000162063	17	+	2479395	2508855	-1.061	JQ1,Nutlin	protein_coding	chr16	2.508e+27	2.5082e+27	chr16	ENSG00000260874	2506253	2509980	-	JQ1,Nutlin-3	-2.198	5	GH16J002458,GH16J002460,GH16J002458,GH16J002460	13.0013017749363,12.9823349943581,13.0013017749363,12.9823349943581	Antisense	2479395	2509980	-30585	ENSG00000260874-CCNF
AMDHD2	ENSG00000162066	11	+	2570358	2581423	-0.283	JQ1	protein_coding	chr16	3053402	3062033	chr16	ENSG00000272079	3056121	3057389	+	Ful,JQ1	0.553	1	GH16J003003	28.7651	Sense	2570358	3056121	-485763	ENSG00000272079-AMDHD2
SHANK2	ENSG00000162105	23	-	70313961	70963623	-0.439	JQ1	protein_coding	chr11	70993621	70996192	chr11	LncRNA242	70995167	70999207	+	Tam,Ful,JQ1	-0.451	1	GH11J071282	5.74006	Antisense	70963623	70995167	-31544	LncRNA242-SHANK2
ZSWIM5	ENSG00000162415	14	-	45482071	45771881	0.328	Tam,Ful,JQ1	protein_coding	chr1	45767872	45771204	chr1	ENSG00000281912	45769582	45771291	+	JQ1	-1.554	1	GH01J045302	14.9997	Antisense	45771881	45769582	2299	ENSG00000281912-ZSWIM5
SDC3	ENSG00000162512	5	-	31342314	31381608	-0.276	JQ1	protein_coding	chr1	31295860	31298188	chr1	ENSG00000223382	31297075	31307278	+	JQ1	-2.033	5	GH01J030823	28.1668	Antisense	31381608	31297075	84533	ENSG00000223382-SDC3
ZNF326	ENSG00000162664	12	+	90460671	90501090	-0.241	Ful,JQ1	protein_coding	chr1	90285171	90289963	chr1	ENSG00000272931	90285733	90286427	-	JQ1	-1.545	1	GH01J089819	10.6054	Antisense	90460671	90286427	174244	ENSG00000272931-ZNF326
BRINP3	ENSG00000162670	8	-	190066792	190446759	-0.55	Tam,Ful,JQ1	protein_coding	chr1	190441331	190449531	chr1	ENSG00000237457	190447681	190449865	+	JQ1	-1.901	2	GH01J190473	610.589	Antisense	190446759	190447681	-922	ENSG00000237457-BRINP3
CCDC74A	ENSG00000163040	8	+	132285248	132291239	-0.408	Ful,JQ1	protein_coding	chr2	132341774	132342973	chr2	LncRNA757	132342711	132345069	+	JQ1	-2.382	1	GH02J131583	5.59747	Sense	132285248	132342711	-57463	LncRNA757-CCDC74A
BOLA3	ENSG00000163170	4	-	74362525	74375121	-0.2	JQ1	protein_coding	chr2	74207612	74216128	chr2	ENSG00000235499	74212259	74213470	+	JQ1	-0.476	2	GH02J073987	10.2073	Antisense	74375121	74212259	162862	ENSG00000235499-BOLA3
CGGBP1	ENSG00000163320	4	-	88101094	88199035	0.334	JQ1	protein_coding	chr3	87840951	87843977	chr3	ENSG00000239572	87780552	87842779	-	Ful	15.772	2	GH03J087791	46.5759	Sense	88199035	87842779	356256	ENSG00000239572-CGGBP1
ATP1A1	ENSG00000163399	23	+	116915290	116952883	0.1	Tam,JQ1	protein_coding	chr1	117034555	117040996	chr1	ENSG00000224950	117035638	117041834	-	JQ1	0.722	2	GH01J116491	15.9662	Antisense	116915290	117041834	-126544	ENSG00000224950-ATP1A1
TIPARP	ENSG00000163659	6	+	156391024	156424559	-0.353	Tam,Ful,JQ1	protein_coding	chr3	1.56532e+17	1.56539e+17	chr3	ENSG00000240875	156465135	156534851	-	JQ1	-1.959	3	GH03J156814,GH03J156809	5.69420906356567,5.9137813257061	Antisense	156391024	156534851	-143827	ENSG00000240875-TIPARP
CCNL1	ENSG00000163660	13	-	156864297	156878549	0.34	JQ1	protein_coding	chr3	156532083	156538902	chr3	ENSG00000240875	156465135	156534851	-	JQ1	-1.959	3	GH03J156814	10.1583	Sense	156878549	156534851	343698	ENSG00000240875-CCNL1
SMIM14	ENSG00000163683	5	-	39547950	39640710	0.287	Tam,Ful,JQ1	protein_coding	chr4	3965702239635760	3965842039642220	chr4	ENSG00000255458	39640760	39668264	+	JQ1	0.549	5	GH04J039656,GH04J039634	5.36046041281677,617.442012545749	Antisense	39640710	39640760	-50	ENSG00000255458-SMIM14
PRRT3	ENSG00000163704	5	-	9987226	9994078	0.339	Tam,Ful	protein_coding	chr3	10050084	10053884	chr3	ENSG00000206567	10048102	10052893	-	Ful,JQ1	0.083	4	GH03J010008	10.8217	Sense	9994078	10052893	-58815	ENSG00000206567-PRRT3
RYK	ENSG00000163785	17	-	133784147	133969689	-0.262	Ful,JQ1	protein_coding	chr3	134066059	134095308	chr3	ENSG00000260633	134066130	134068075	-	JQ1	-2.314	1	GH03J134347	24.5515	Sense	133969689	134068075	-98386	ENSG00000260633-RYK
RFC4	ENSG00000163918	11	-	186507669	186524847	-0.583	JQ1	protein_coding	chr3	1.86533e+17	1.86535e+17	chr3	ENSG00000232233	186528669	186543310	-	JQ1	-0.614	4	GH03J186814,GH03J186824	8.40687591909902,18.0349662900828	Sense	186524847	186543310	-18463	ENSG00000232233-RFC4
HPGD	ENSG00000164120	7	-	175411328	175444305	-0.759	JQ1	protein_coding	chr4	1.75459e+53	1.75461e+53	chr4	ENSG00000250596	175444852	175461495	-	Ful	-17.054	3	GH04J174537,GH04J174521,GH04J174540,GH04J174528,GH04J174537,GH04J174540	6.14542359030759,631.354254145121,6.61942071280021,20.0969302826959,6.14542359030759,6.61942071280021	Sense	175444305	175461495	-17190	ENSG00000250596-HPGD
IL15	ENSG00000164136	10	+	142557752	142655140	-1.201	JQ1	protein_coding	chr4	142249276	142251387	chr4	ENSG00000248810	142240604	142253772	-	JQ1	1.796	3	GH04J141328	11.6033	Antisense	142557752	142253772	303980	ENSG00000248810-IL15
HNF4G	ENSG00000164749	11	+	76320149	76479078	-2.097	JQ1	protein_coding	chr8	76235435	76237235	chr8	ENSG00000249395	76135639	76236976	-	Tam,Ful,JQ1	0.204	3	GH08J075324	600.178	Antisense	76320149	76236976	83173	ENSG00000249395-HNF4G
TMEM184A	ENSG00000164855	9	-	1581871	1600457	-0.429	JQ1,Nutlin	protein_coding	chr7	16056081605608	16122521612252	chr7	ENSG00000230487	1609709	1629262	+	Tam,Ful,JQ1,Nutlin-3	0.517	6	GH07J001565,GH07J001565	600.44241771882,600.44241771882	Antisense	1600457	1609709	-9252	ENSG00000230487-TMEM184A
INTS1	ENSG00000164880	48	-	1509913	1545489	0.264	JQ1	protein_coding	chr7	1505437	1507836	chr7	ENSG00000273230	1504133	1507158	-	JQ1	-0.473	1	GH07J001465	36.3226	Sense	1545489	1507158	38331	ENSG00000273230-INTS1
OSR2	ENSG00000164920	5	+	99956631	99964332	0.466	Ful,JQ1	protein_coding	chr8	99951242	99964186	chr8	ENSG00000271930	99955823	99956326	+	Ful,JQ1	-1.044	1	GH08J098939	613.534	Sense	99956631	99955823	808	ENSG00000271930-OSR2
METTL2B	ENSG00000165055	9	+	128116783	128146656	0.329	JQ1	protein_coding	chr7	128162455	128167454	chr7	ENSG00000273270	128164070	128171123	-	Ful	0.136	1	GH07J128523	28.2738	Antisense	128116783	128171123	-54340	ENSG00000273270-METTL2B
PCF11	ENSG00000165494	16	+	82868030	82898493	-0.177	Ful	protein_coding	chr11	82896586	82900605	chr11	ENSG00000269939	82896563	82898078	-	JQ1	0.823	1	GH11J083185	11.7992	Antisense	82868030	82898078	-30048	ENSG00000269939-PCF11
RPL36AL	ENSG00000165502	2	-	50085237	50087403	0.203	JQ1	protein_coding	chr14	50435787	50451256	chr14	ENSG00000214900	50394289	50559361	-	Ful,JQ1	-0.411	12	GH14J049969	6.39809	Sense	50087403	50559361	-471958	ENSG00000214900-RPL36AL
DNAAF2	ENSG00000165506	3	-	50091892	50101948	-0.09	Ful,JQ1	protein_coding	chr14	50097118	50103731	chr14	LncRNA1582	50102781	50109512	+	JQ1	0.674	1	GH14J049630	600.666	Antisense	50101948	50102781	-833	LncRNA1582-DNAAF2
ARF6	ENSG00000165527	2	+	50359810	50361490	-0.238	Tam,Ful	protein_coding	chr14	5.04937e+55	5.05001e+55	chr14	ENSG00000214900	50394289	50559361	-	Ful,JQ1	-0.411	12	GH14J050026,GH14J050043,GH14J050057,GH14J050020,GH14J049997,GH14J049969,GH14J050080	2.55817673651086,5.69367014430514,3.33634480278126,1.73449489711771,2.07609567416395,3.54457282972112,2.80559565744793	Antisense	50359810	50559361	-199551	ENSG00000214900-ARF6
AMER2	ENSG00000165566	3	-	25735822	25746426	-1.685	JQ1	protein_coding	chr13	25689662	25692134	chr13	LncRNA344	25690670	25691153	+	JQ1	-1.757	5	GH13J025115	50.1921	Antisense	25746426	25690670	55756	LncRNA344-AMER2
TTC7B	ENSG00000165914	20	-	91006932	91282823	-0.602	JQ1	protein_coding	chr14	91293801	91296039	chr14	ENSG00000258884	91288709	91294472	-	JQ1	0.556	3	GH14J090827	9.33474	Sense	91282823	91294472	-11649	ENSG00000258884-TTC7B
ARIH1	ENSG00000166233	14	+	72766667	72879692	0.359	JQ1	protein_coding	chr15	72763480	72769942	chr15	ENSG00000261423	72700119	72767509	-	JQ1	-1.392	4	GH15J072471	654.516	Antisense	72766667	72767509	-842	ENSG00000261423-ARIH1
CDYL2	ENSG00000166446	8	-	80631803	80838226	0.235	Tam,Ful,JQ1	protein_coding	chr16	80885573	80887026	chr16	ENSG00000260896	80862632	80926492	-	JQ1	1.335	4	GH16J080851	4.82983	Sense	80838226	80926492	-88266	ENSG00000260896-CDYL2
TMED3	ENSG00000166557	4	+	79603404	79704334	0.186	JQ1	protein_coding	chr15	79576142	79576343	chr15	ENSG00000259234	79484049	79576287	-	JQ1	2.013	4	GH15J079283	11.1291	Antisense	79603404	79576287	27117	ENSG00000259234-TMED3
TMEM135	ENSG00000166575	15	+	86748886	87034800	0.035	Ful,JQ1	protein_coding	chr11	86662774	86668363	chr11	ENSG00000246523	86666661	86712001	+	JQ1	-1.352	3	GH11J086953	600.178	Sense	86748886	86666661	82225	ENSG00000246523-TMEM135
FAM111A	ENSG00000166801	5	+	58910221	58922512	0.263	Tam	protein_coding	chr11	5.89061e+31	5.89065e+31	chr11	ENSG00000245571	58897606	58910488	-	Ful	0.411	5	GH11J059138,GH11J059135,GH11J059141,GH11J059134	7.96391992944564,7.69068607559562,622.272549273561,7.53062006419759	Antisense	58910221	58910488	-267	ENSG00000245571-FAM111A
PHB	ENSG00000167085	8	-	47481414	47492246	-0.004	Ful,JQ1	protein_coding	chr17	47536363	47537562	chr17	ENSG00000249497	47535223	47539111	-	Tam	-27.622	3	GH17J049459	11.3632	Sense	47492246	47539111	-46865	ENSG00000249497-PHB
SERPINF2	ENSG00000167711	10	+	1646130	1658562	-1.02	Tam,JQ1	protein_coding	chr17	1615548	1622588	chr17	ENSG00000186594	1614787	1620468	-	JQ1	1.117	4	GH17J001712	32.5507	Antisense	1646130	1620468	25662	ENSG00000186594-SERPINF2
WDR81	ENSG00000167716	11	+	1619817	1641893	-0.926	JQ1	protein_coding	chr17	1615548	1622588	chr17	ENSG00000186594	1614787	1620468	-	JQ1	1.117	4	GH17J001712	633.857	Antisense	1619817	1620468	-651	ENSG00000186594-WDR81
ZNF598	ENSG00000167962	12	-	2047655	2059824	-0.023	Ful,JQ1	protein_coding	chr16	2039801	2044167	chr16	ENSG00000261790	2034878	2040358	-	JQ1	-3.101	2	GH16J001989	8.11372	Sense	2059824	2040358	19466	ENSG00000261790-ZNF598
RAB26	ENSG00000167964	10	+	2190804	2204166	0.199	Tam,Ful,JQ1	protein_coding	chr16	2197100	2214482	chr16	ENSG00000260260	2204798	2205359	-	JQ1	0.367	2	GH16J002147	600.41	Antisense	2190804	2205359	-14555	ENSG00000260260-RAB26
MLST8	ENSG00000167965	9	+	2254249	2259417	-0.545	JQ1	protein_coding	chr16	2197100	2214482	chr16	ENSG00000260260	2204798	2205359	-	JQ1	0.367	2	GH16J002147	23.0353	Antisense	2254249	2205359	48890	ENSG00000260260-MLST8
CASKIN1	ENSG00000167971	20	-	2227184	2246526	-1.203	JQ1	protein_coding	chr16	2197100	2214482	chr16	ENSG00000260260	2204798	2205359	-	JQ1	0.367	2	GH16J002147	12.9351	Sense	2246526	2205359	41167	ENSG00000260260-CASKIN1
SF1	ENSG00000168066	14	-	64532078	64546258	0	Ful,JQ1	protein_coding	chr11	64543872	64548902	chr11	LncRNA1545	64547420	64548457	+	JQ1	-0.665	1	GH11J064776	616.563	Antisense	64546258	64547420	-1162	LncRNA1545-SF1
RAB4A	ENSG00000168118	8	+	229406822	229441641	0.135	Ful	protein_coding	chr1	229403707	229410544	chr1	ENSG00000177788	229394028	229406775	-	JQ1	-0.89	2	GH01J229267	608.158	Antisense	229406822	229406775	47	ENSG00000177788-RAB4A
IRF2BP2	ENSG00000168264	2	-	234740015	234745271	-0.431	JQ1	protein_coding	chr1	2.3485e+26	2.34865e+26	chr1	ENSG00000227630	234859789	234867390	+	JQ1	-3.911	3	GH01J234714,GH01J234968,GH01J234953	91.047668760545,46.146556092821,32.4023427284262	Antisense	234745271	234859789	-114518	ENSG00000227630-IRF2BP2
COG7	ENSG00000168434	17	-	23399814	23464501	-0.959	JQ1	protein_coding	chr16	23462521	23465322	chr16	ENSG00000260136	23464079	23468927	+	JQ1	-0.704	3	GH16J023452	600.666	Antisense	23464501	23464079	422	ENSG00000260136-COG7
ZNF30	ENSG00000168661	6	+	35417807	35436074	0.575	JQ1	protein_coding	chr19	3.53499e+23	3.53519e+23	chr19	ENSG00000271109	35340182	35351480	-	JQ1	-0.988	3	GH19J034860,GH19J034856,GH19J034852	10.7184357187612,10.9033769664982,10.8938233288737	Antisense	35417807	35351480	66327	ENSG00000271109-ZNF30
CNNM3	ENSG00000168763	8	+	97481982	97499648	0.664	JQ1	protein_coding	chr2	97480737	97487615	chr2	LncRNA1700	97480739	97481759	-	JQ1	-0.41	1	GH02J096815	600.666	Antisense	97481982	97481759	223	LncRNA1700-CNNM3
USP39	ENSG00000168883	14	+	85829979	85876403	0.197	JQ1	protein_coding	chr2	85763444	85770322	chr2	LncRNA790	85764503	85766182	-	JQ1	-1.628	1	GH02J085536	39.9011	Antisense	85829979	85766182	63797	LncRNA790-USP39
MAT2A	ENSG00000168906	9	+	85766288	85772403	-0.118	Tam,Ful,JQ1	protein_coding	chr2	85763444	85770322	chr2	LncRNA790	85764503	85766182	-	JQ1	-1.628	1	GH02J085536	600.666	Antisense	85766288	85766182	106	LncRNA790-MAT2A
IRS1	ENSG00000169047	2	-	227596033	227664475	-0.401	Tam,Ful,JQ1	protein_coding	chr2	227653327	227667117	chr2	ENSG00000272622	227664862	227675745	+	JQ1	-1.969	4	GH02J226788	602.296	Antisense	227664475	227664862	-387	ENSG00000272622-IRS1
SNUPN	ENSG00000169371	10	-	75890424	75918810	-1.241	JQ1	protein_coding	chr15	75659184	75663007	chr15	ENSG00000260274	75660496	75661925	+	JQ1	0.336	1	GH15J075366	34.2002	Antisense	75918810	75660496	258314	ENSG00000260274-SNUPN
SIN3A	ENSG00000169375	21	-	75661720	75748183	0.225	JQ1	protein_coding	chr15	75659184	75663007	chr15	ENSG00000260274	75660496	75661925	+	JQ1	0.336	1	GH15J075366	91.7893	Antisense	75748183	75660496	87687	ENSG00000260274-SIN3A
PTK2	ENSG00000169398	33	-	141667999	142012315	-0.421	JQ1	protein_coding	chr8	142065101	142070514	chr8	ENSG00000253266	142065389	142070695	+	Ful,JQ1	-1.696	5	GH08J141055	11.772	Antisense	142012315	142065389	-53074	ENSG00000253266-PTK2
ASPSCR1	ENSG00000169696	17	+	79934683	79975282	-0.465	JQ1	protein_coding	chr17	7992400179923270	7992695079923870	chr17	ENSG00000264735	79923508	79924465	-	Ful	-20.261	1	GH17J081965,GH17J081966	15.7037045287557,15.0331310942874	Antisense	79934683	79924465	10218	ENSG00000264735-ASPSCR1
TM4SF1	ENSG00000169908	5	-	149086809	149095652	-0.606	Ful,JQ1	protein_coding	chr3	149098690	149115186	chr3	ENSG00000243885	149101966	149103587	-	JQ1	-2.213	2	GH03J149381	10.2494	Sense	149095652	149103587	-7935	ENSG00000243885-TM4SF1
ZNF764	ENSG00000169951	3	-	30565085	30569819	-0.86	JQ1	protein_coding	chr16	30644727	30646889	chr16	LncRNA499	30645883	30646919	+	Tam,Ful	-0.365	1	GH16J030633	14.9293	Antisense	30569819	30645883	-76064	LncRNA499-ZNF764
UBE2E3	ENSG00000170035	7	+	181831975	181941312	-0.564	JQ1	protein_coding	chr2	1.81487e+26	1.81488e+26	chr2	ENSG00000225258	181436439	181557181	-	JQ1	-2.397	4	GH02J180622,GH02J180625,GH02J180647	4.24992014454252,3.99406966610104,4.33530976936099	Antisense	181831975	181557181	274794	ENSG00000225258-UBE2E3
FAXDC2	ENSG00000170271	9	-	154198051	154238812	-1.173	Tam,JQ1	protein_coding	chr5	154259269	154260065	chr5	LncRNA1146	154259523	154261792	-	Tam,Ful,JQ1	0.164	1	GH05J154879	11.7665	Sense	154238812	154261792	-22980	LncRNA1146-FAXDC2
SERPINB9	ENSG00000170542	7	-	2887500	2903514	0.733	JQ1	protein_coding	chr6	2979554	2993153	chr6	ENSG00000244041	2988201	2991407	+	JQ1	-1.65	3	GH06J002979	16.1663	Antisense	2903514	2988201	-84687	ENSG00000244041-SERPINB9
RNF139	ENSG00000170881	2	+	125486979	125500155	0.133	JQ1	protein_coding	chr8	125483577	125489642	chr8	ENSG00000245149	125474726	125486817	-	JQ1	0.649	3	GH08J124471	600.666	Antisense	125486979	125486817	162	ENSG00000245149-RNF139
TRMT61B	ENSG00000171103	7	-	29072687	29093167	-1.618	JQ1	protein_coding	chr2	29032781	29034467	chr2	ENSG00000273233	29033147	29033572	-	JQ1	3.951	1	GH02J028809	11.3926	Sense	29093167	29033572	59595	ENSG00000273233-TRMT61B
SOCS5	ENSG00000171150	2	+	46926091	46990268	0.203	Ful	protein_coding	chr2	4.70661e+31	4.70669e+31	chr2	ENSG00000239332	47043836	47086146	+	JQ1	2.444	3	GH02J046838,GH02J046825,GH02J046844,GH02J046834	9.94682405290935,9.96301606373628,2.22392488420293,9.95409465213099	Sense	46926091	47043836	-117745	ENSG00000239332-SOCS5
NPTX1	ENSG00000171246	5	-	78440948	78451643	1.352	JQ1	protein_coding	chr17	78427101	78432086	chr17	ENSG00000260369	78427535	78428529	-	JQ1	-2.694	1	GH17J080453	6.55021	Sense	78451643	78428529	23114	ENSG00000260369-NPTX1
CLCN5	ENSG00000171365	15	+	49687225	49863892	0.904	JQ1	protein_coding	chrX	49641501	49646204	chrX	ENSG00000234390	49641327	49643844	-	JQ1	-1.408	2	GH0XJ049876	18.3948	Antisense	49687225	49643844	43381	ENSG00000234390-CLCN5
KCND3	ENSG00000171385	8	-	112313284	112531777	-0.86	JQ1	protein_coding	chr1	112530823	112535017	chr1	ENSG00000231437	112532392	112541464	+	JQ1	-1.437	2	GH01J111990	600.666	Antisense	112531777	112532392	-615	ENSG00000231437-KCND3
LRRC8D	ENSG00000171492	4	+	90286573	90402170	-0.259	Tam,Ful,JQ1	protein_coding	chr1	90285171	90289963	chr1	ENSG00000272931	90285733	90286427	-	JQ1	-1.545	1	GH01J089819	600.666	Antisense	90286573	90286427	146	ENSG00000272931-LRRC8D
ZNF584	ENSG00000171574	5	+	58912871	58929694	-0.496	Ful,JQ1	protein_coding	chr19	58911567	58913968	chr19	ENSG00000268307	58911588	58912046	+	Ful	1.464	1	GH19J058400	644.978	Sense	58912871	58911588	1283	ENSG00000268307-ZNF584
P2RY6	ENSG00000171631	4	+	72975550	73009662	-0.5	Tam,Ful,JQ1	protein_coding	chr11	72959191	72961845	chr11	LncRNA245	72956521	72959333	+	JQ1	-3.01	1	GH11J073248	6.43047	Sense	72975550	72956521	19029	LncRNA245-P2RY6
METTL18	ENSG00000171806	2	-	169761670	169764107	-0.265	Tam,Ful,JQ1	protein_coding	chr1	169451238	169457638	chr1	ENSG00000213062	169455314	169456224	+	Tam,Ful,JQ1	-0.815	1	GH01J169482	28.5873	Antisense	169764107	169455314	308793	ENSG00000213062-METTL18
CEBPB	ENSG00000172216	1	+	48807376	48809212	-0.296	Ful	protein_coding	chr20	4891827748907430	4893073748914480	chr20	ENSG00000203999	48909257	48931459	+	JQ1	-2.638	5	GH20J050301,GH20J050291	42.1554547763137,31.7950688878912	Sense	48807376	48909257	-101881	ENSG00000203999-CEBPB
RASGRP1	ENSG00000172575	17	-	38780304	38857776	-1.599	Tam,Ful,JQ1	protein_coding	chr15	3.93427e+23	3.9343e+23	chr15	ENSG00000259345	39157523	39719396	-	JQ1	-0.5	8	GH15J039050,GH15J038969,GH15J038871	2.81206131920603,1.24680228737252,1.78578422619029	Sense	38857776	39719396	-861620	ENSG00000259345-RASGRP1
RAD9A	ENSG00000172613	11	+	67159176	67165881	0.347	JQ1	protein_coding	chr11	67132170	67144486	chr11	ENSG00000275484	67141887	67142403	+	JQ1	-1.232	1	GH11J067364	5.90188	Sense	67159176	67141887	17289	ENSG00000275484-RAD9A
HOXC5	ENSG00000172789	2	+	54426637	54429142	-1.626	JQ1	protein_coding	chr12	54365605	54428586	chr12	ENSG00000260597	54413694	54416373	+	JQ1	-1.034	1	GH12J053971	602.91	Sense	54426637	54413694	12943	ENSG00000260597-HOXC5
DCAKD	ENSG00000172992	5	-	43100708	43138473	-0.222	JQ1	protein_coding	chr17	43220517	43230110	chr17	ENSG00000276728	43224097	43225837	-	JQ1	-1.672	1	GH17J045143	21.9286	Sense	43138473	43225837	-87364	ENSG00000276728-DCAKD
GLRX	ENSG00000173221	4	-	95087023	95158709	0.443	JQ1	protein_coding	chr5	9519215795188250	9520274395190310	chr5	ENSG00000236882	95187936	95195837	+	JQ1	1.309	4	GH05J095856,GH05J095852	12.199592547114,8.69460978602841	Antisense	95158709	95187936	-29227	ENSG00000236882-GLRX
NAA20	ENSG00000173418	7	+	19997760	20014299	-0.271	Ful,JQ1	protein_coding	chr20	1.97711e+39	1.97718e+39	chr20	ENSG00000233895	19738352	19790319	+	JQ1	-0.778	3	GH20J019790,GH20J019806,GH20J019792,GH20J019791,GH20J019782	9.93496632827129,9.89231970140693,10.686136634151,10.6852234187898,10.7294381056303	Sense	19997760	19738352	259408	ENSG00000233895-NAA20
PEAK1	ENSG00000173517	7	-	77400471	77712486	0.484	Ful,JQ1	protein_coding	chr15	7781754477825340	7782414177827540	chr15	ENSG00000259362	77817882	77826452	+	Ful,JQ1	-1.599	2	GH15J077526,GH15J077533	9.75315081482083,10.5717547647727	Antisense	77712486	77817882	-105396	ENSG00000259362-PEAK1
ZNF622	ENSG00000173545	6	-	16451628	16465901	0.367	JQ1	protein_coding	chr5	1641111116430310	1641270916432500	chr5	ENSG00000248150	16373470	16440190	-	Tam,Ful,JQ1	13.634	8	GH05J016411,GH05J016430	4.72842160701893,4.51859766908556	Sense	16465901	16440190	25711	ENSG00000248150-ZNF622
XXYLT1	ENSG00000173950	5	-	194789008	194991896	0.16	Ful,JQ1	protein_coding	chr3	194572130	194576329	chr3	LncRNA1025	194570008	194572747	-	JQ1	-0.656	2	GH03J194851	10.447	Sense	194991896	194572747	419149	LncRNA1025-XXYLT1
GOLT1A	ENSG00000174567	5	-	204167288	204183220	-0.269	JQ1	protein_coding	chr1	204336530	204338928	chr1	ENSG00000280924	204337559	204338847	-	JQ1	-2.097	1	GH01J204366	11.0851	Sense	204183220	204338847	-155627	ENSG00000280924-GOLT1A
FZD4	ENSG00000174804	2	-	86656721	86666433	0.359	Tam,Ful,JQ1	protein_coding	chr11	86662774	86668363	chr11	ENSG00000246523	86666661	86712001	+	JQ1	-1.352	3	GH11J086953	600.666	Antisense	86666433	86666661	-228	ENSG00000246523-FZD4
ZNF654	ENSG00000175105	9	+	88188254	88193815	0.556	JQ1	protein_coding	chr3	87840951	87843977	chr3	ENSG00000239572	87780552	87842779	-	Ful	15.772	2	GH03J087791	37.8051	Antisense	88188254	87842779	345475	ENSG00000239572-ZNF654
POLD4	ENSG00000175482	4	-	67118248	67124443	-0.334	JQ1	protein_coding	chr11	67132170	67144486	chr11	ENSG00000275484	67141887	67142403	+	JQ1	-1.232	1	GH11J067364	600.41	Antisense	67124443	67141887	-17444	ENSG00000275484-POLD4
CLCF1	ENSG00000175505	3	-	67131639	67141648	-1.071	Tam,JQ1	protein_coding	chr11	67132170	67144486	chr11	ENSG00000275484	67141887	67142403	+	JQ1	-1.232	1	GH11J067364	603.405	Antisense	67141648	67141887	-239	ENSG00000275484-CLCF1
ORAI3	ENSG00000175938	3	+	30960387	30967782	0.429	Tam,Ful	protein_coding	chr16	30967534	30970890	chr16	ENSG00000275263	30968193	30968520	-	JQ1	-1.955	1	GH16J030956	28.4004	Antisense	30960387	30968520	-8133	ENSG00000275263-ORAI3
LYSMD3	ENSG00000176018	4	-	89811428	89825401	0.357	Ful,JQ1	protein_coding	chr5	90672508	90680990	chr5	ENSG00000281357	90676166	90734902	+	JQ1	-0.562	3	GH05J091376	4.55142	Antisense	89825401	90676166	-850765	ENSG00000281357-LYSMD3
YES1	ENSG00000176105	12	-	721588	812547	0.128	JQ1	protein_coding	chr18	806897	815181	chr18	ENSG00000273355	813275	813757	+	JQ1	-1.07	1	GH18J000806	609.652	Antisense	812547	813275	-728	ENSG00000273355-YES1
KBTBD11	ENSG00000176595	2	+	1922044	1955102	-2.774	JQ1	protein_coding	chr8	19199661920366	19201671924839	chr8	ENSG00000253696	1919563	1924644	+	JQ1	-2.47	3	GH08J001973,GH08J001972	600.665628627291,608.393972854939	Sense	1922044	1919563	2481	ENSG00000253696-KBTBD11
LMNB2	ENSG00000176619	12	-	2427636	2456994	-0.199	Ful,JQ1	protein_coding	chr19	2460998	2463790	chr19	ENSG00000267201	2458933	2462183	-	JQ1	-2.824	2	GH19J002461	11.6452	Sense	2456994	2462183	-5189	ENSG00000267201-LMNB2
C20orf197	ENSG00000176659	4	+	58630980	58648008	-2.595	Tam,Ful,JQ1	protein_coding	chr20	58674856	58683903	chr20	ENSG00000228340	58662895	59102516	+	Ful,JQ1	-2.221	8	GH20J060101	19.1479	Sense	58630980	58662895	-31915	ENSG00000228340-C20orf197
ACSF3	ENSG00000176715	11	+	89154783	89222254	-0.29	JQ1	protein_coding	chr16	8.92302e+23	8.92312e+23	chr16	ENSG00000180422	89225554	89230653	+	JQ1	-0.506	4	GH16J089163,GH16J089052,GH16J089166	20.1909433549713,6.72636253464894,12.9951095341874	Sense	89154783	89225554	-70771	ENSG00000180422-ACSF3
METRNL	ENSG00000176845	4	+	81037567	81052864	0.35	JQ1	protein_coding	chr17	8105569681059830	8105833381061550	chr17	ENSG00000274370	81056122	81056732	+	JQ1	0.891	1	GH17J083097,GH17J083101	2.66076398642183,4.90444031690565	Sense	81037567	81056122	-18555	ENSG00000274370-METRNL
DPP7	ENSG00000176978	13	-	140004994	140009629	-0.396	JQ1	protein_coding	chr9	140021081	140025188	chr9	LncRNA1437	140023111	140024679	-	JQ1	-0.277	1	GH09J137126	611.689	Sense	140009629	140024679	-15050	LncRNA1437-DPP7
ULK1	ENSG00000177169	28	+	132379196	132407712	-0.389	Ful	protein_coding	chr12	132344299	132349032	chr12	ENSG00000256955	132341965	132349083	+	Ful,JQ1	-1.203	3	GH12J131859	2.18725	Sense	132379196	132341965	37231	ENSG00000256955-ULK1
PUS1	ENSG00000177192	6	+	132413745	132428406	-0.863	Tam,Ful	protein_coding	chr12	1.32412e+17	1.32416e+17	chr12	ENSG00000255992	132409281	132413896	-	JQ1	-1.885	3	GH12J131927,GH12J131923	617.301177678945,7.02642997550738	Antisense	132413745	132413896	-151	ENSG00000255992-PUS1
C8orf31	ENSG00000177335	8	+	144120626	144141359	1.528	Ful	protein_coding	chr8	144071419	144076596	chr8	ENSG00000247317	144063155	144099854	-	JQ1	-1.56	3	GH08J142990	18.3778	Antisense	144120626	144099854	20772	ENSG00000247317-C8orf31
ATOX1	ENSG00000177556	5	-	151121877	151152093	0.188	JQ1	protein_coding	chr5	151149361	151155962	chr5	ENSG00000275765	151149803	151151069	-	JQ1	-1.447	2	GH05J151769	600.666	Sense	151152093	151151069	1024	ENSG00000275765-ATOX1
JUN	ENSG00000177606	1	-	59246465	59249785	1.327	JQ1	protein_coding	chr1	5.9522e+223	5.95241e+223	chr1	ENSG00000237352	59399315	59706227	+	JQ1	-0.648	14	GH01J059056,GH01J058977,GH01J059130,GH01J059018,GH01J059126,GH01J059135,GH01J059025,GH01J058964,GH01J058995,GH01J058948,GH01J058941,GH01J059127,GH01J059153,GH01J059132,GH01J059124,GH01J058925,GH01J059134,GH01J059149,GH01J059070,GH01J059041,GH01J059141,GH01J058976,GH01J059058,GH01J059083,GH01J059125,GH01J059076,GH01J059122,GH01J059100	10.7491888149911,10.5986927305573,10.1247909880344,10.7482222734499,10.430389709693,10.1518998232336,10.6333971303404,11.0318649109445,10.6610711613289,10.5980836069904,11.4905964385507,10.430389709693,12.5425357309508,10.2614046893958,10.4313731723896,13.3624167179996,10.1518998232336,10.2640935438221,10.3483085342411,10.3480339681714,9.94350530564591,10.5986927305573,10.7491888149911,10.2142223…	Antisense	59249785	59399315	-149530	ENSG00000237352-JUN
SOX12	ENSG00000177732	1	+	306207	310865	-0.363	JQ1	protein_coding	chr20	288611	295643	chr20	LncRNA859	294179	295299	-	Ful	0.479	1	GH20J000307	3.05143	Antisense	306207	295299	10908	LncRNA859-SOX12
ODF3B	ENSG00000177989	7	-	50968139	50971009	-1.082	JQ1	protein_coding	chr22	50975719	50981661	chr22	ENSG00000273272	50981079	50981440	+	Tam,Ful,JQ1	-17.563	1	GH22J050536	27.5696	Antisense	50971009	50981079	-10070	ENSG00000273272-ODF3B
CALML5	ENSG00000178372	1	-	5540658	5541533	-1.797	JQ1	protein_coding	chr10	5.52552e+27	5.52693e+27	chr10	LncRNA183	5523450	5528597	-	Tam,Ful,JQ1	-0.471	3	GH10J005483,GH10J005486,GH10J005485,GH10J005476	7.68746951146043,9.46223668860493,5.84589478861523,18.9879544557946	Sense	5541533	5528597	12936	LncRNA183-CALML5
TUBAL3	ENSG00000178462	4	-	5435061	5446793	-1.863	JQ1	protein_coding	chr10	5527999	5532494	chr10	LncRNA183	5523450	5528597	-	Tam,Ful,JQ1	-0.471	3	GH10J005486	609.281	Sense	5446793	5528597	-81804	LncRNA183-TUBAL3
ZHX2	ENSG00000178764	4	+	123793633	123986750	-2.381	JQ1	protein_coding	chr8	1.23792e+17	1.23796e+17	chr8	ENSG00000272384	123792210	123793069	-	Ful,JQ1	-0.503	1	GH08J122779,GH08J122779	615.300286117975,615.300286117975	Antisense	123793633	123793069	564	ENSG00000272384-ZHX2
C9orf50	ENSG00000179058	7	-	132374504	132383055	-1.92	JQ1	protein_coding	chr9	132341880	132350645	chr9	ENSG00000227619	132337688	132346835	+	JQ1	-2.501	4	GH09J129579	18.004	Antisense	132383055	132337688	45367	ENSG00000227619-C9orf50
LINC00174	ENSG00000179406	24	-	65841031	65866325	-0.405	JQ1	lincRNA	chr7	65957201	65959788	chr7	ENSG00000237310	65958693	65960461	+	JQ1	0.583	2	GH07J066492	600.666	Antisense	65866325	65958693	-92368	ENSG00000237310-LINC00174
NRIP1	ENSG00000180530	5	-	16333556	16437321	-0.736	Tam,Ful,JQ1	protein_coding	chr21	1.63275e+79	1.63305e+79	chr21	ENSG00000235609	16191164	16386751	-	Ful,JQ1	0.438	4	GH21J014956,GH21J015013,GH21J014957,GH21J014995,GH21J014874,GH21J014866,GH21J014867,GH21J014863,GH21J014973,GH21J015007	5.819495316405,4.52372292813038,4.5425252650721,1.69760159032539,6.25754499348513,4.52027197684515,3.79032359697012,7.46134140094286,4.5553750398733,16.4868776643453	Sense	16437321	16386751	50570	ENSG00000235609-NRIP1
TMEM64	ENSG00000180694	6	-	91634223	91803860	-0.731	Tam,Ful,JQ1	protein_coding	chr8	9159702991580830	9159762891582220	chr8	ENSG00000254180	91546839	91632298	-	Ful	-0.93	5	GH08J090584,GH08J090568	10.3131868967056,4.43186270385995	Sense	91803860	91632298	171562	ENSG00000254180-TMEM64
D2HGDH	ENSG00000180902	12	+	242673994	242708231	0.275	JQ1	protein_coding	chr2	2.42672e+17	2.42672e+17	chr2	LncRNA833	242671285	242673233	-	JQ1	-0.47	2	GH02J241732,GH02J241734	600.665628627291,618.435780469497	Antisense	242673994	242673233	761	LncRNA833-D2HGDH
FAM83H	ENSG00000180921	5	-	144806103	144815971	-0.776	JQ1	protein_coding	chr8	144852771	144854610	chr8	ENSG00000254973	144840323	144853992	-	JQ1	0.764	3	GH08J143770	16.6161	Sense	144815971	144853992	-38021	ENSG00000254973-FAM83H
MRPL14	ENSG00000180992	3	-	44081194	44095194	-0.254	Tam,Ful	protein_coding	chr6	44061741	44063549	chr6	LncRNA1802	44059756	44063777	-	JQ1	0.565	1	GH06J044094	31.2723	Sense	44095194	44063777	31417	LncRNA1802-MRPL14
ZNF329	ENSG00000181894	5	-	58637619	58666477	0.279	Tam,Ful	protein_coding	chr19	58911567	58913968	chr19	ENSG00000268307	58911588	58912046	+	Ful	1.464	1	GH19J058400	17.2395	Antisense	58666477	58911588	-245111	ENSG00000268307-ZNF329
TNRC18	ENSG00000182095	30	-	5346421	5465045	0.053	Tam,Ful,JQ1	protein_coding	chr7	5456080	5471143	chr7	ENSG00000234432	5465908	5468558	-	JQ1	-0.936	1	GH07J005416	620.414	Sense	5465045	5468558	-3513	ENSG00000234432-TNRC18
TEX19	ENSG00000182459	2	+	80317123	80321652	-0.63	JQ1	protein_coding	chr17	80249172	80263846	chr17	ENSG00000260563	80251592	80252786	+	JQ1	-0.645	1	GH17J082291	25.5227	Sense	80317123	80251592	65531	ENSG00000260563-TEX19
RGS6	ENSG00000182732	19	+	72399156	73030654	0.395	JQ1	protein_coding	chr14	72314718	72316117	chr14	ENSG00000266869	72315323	72375147	+	JQ1	-0.693	2	GH14J071848	600.372	Sense	72399156	72315323	83833	ENSG00000266869-RGS6
ALG12	ENSG00000182858	10	-	50293877	50312106	-0.358	JQ1	protein_coding	chr22	50322048	50333344	chr22	ENSG00000278869	50326846	50327722	-	JQ1	-1.994	1	GH22J049927	10.9903	Sense	50312106	50327722	-15616	ENSG00000278869-ALG12
HMGN4	ENSG00000182952	2	+	26538633	26546482	-0.559	JQ1	protein_coding	chr6	26520228	26524229	chr6	ENSG00000228223	26523678	26526807	+	JQ1	-1.765	1	GH06J026520	26.7315	Sense	26538633	26523678	14955	ENSG00000228223-HMGN4
GAS6	ENSG00000183087	15	-	114523522	114567046	-0.236	JQ1	protein_coding	chr13	114562124	114568173	chr13	ENSG00000272695	114567141	114569806	+	JQ1	-1.325	2	GH13J113859	621.938	Antisense	114567046	114567141	-95	ENSG00000272695-GAS6
PTTG1IP	ENSG00000183255	6	-	46269500	46293752	0.432	JQ1	protein_coding	chr21	46336141	46353716	chr21	ENSG00000183250	46352729	46359828	-	JQ1	-0.534	4	GH21J044916	14.3928	Sense	46293752	46359828	-66076	ENSG00000183250-PTTG1IP
PCBP3	ENSG00000183570	16	+	47063608	47362368	1.347	JQ1	protein_coding	chr21	47389801	47407678	chr21	ENSG00000274248	47394403	47394867	+	Tam,JQ1	-14.991	1	GH21J045970	8.67465	Sense	47063608	47394403	-330795	ENSG00000274248-PCBP3
TRMT12	ENSG00000183665	3	+	125463048	125474391	-0.225	Ful,JQ1	protein_coding	chr8	1.25484e+17	1.2549e+17	chr8	ENSG00000245149	125474726	125486817	-	JQ1	0.649	3	GH08J124471,GH08J124465	69.0872411815592,18.4031330126538	Antisense	125463048	125486817	-23769	ENSG00000245149-TRMT12
TBL3	ENSG00000183751	26	+	2022038	2032934	-0.271	Ful	protein_coding	chr16	2031601	2036145	chr16	ENSG00000261790	2034878	2040358	-	JQ1	-3.101	2	GH16J001981	10.6121	Antisense	2022038	2040358	-18320	ENSG00000261790-TBL3
AIFM3	ENSG00000183773	21	+	21319396	21335649	-0.808	JQ1	protein_coding	chr22	2131568921318680	2131688721320080	chr22	ENSG00000237476	21311380	21318967	+	JQ1	-1.731	2	GH22J020961,GH22J020965	8.13877264016511,600.665628627291	Sense	21319396	21311380	8016	ENSG00000237476-AIFM3
GPR39	ENSG00000183840	3	+	133174147	133404132	-0.642	Ful,JQ1	protein_coding	chr2	133102374	133105974	chr2	ENSG00000272769	133103189	133104870	-	JQ1	-0.8	1	GH02J132346	10.2206	Antisense	133174147	133104870	69277	ENSG00000272769-GPR39
PTP4A2	ENSG00000184007	7	-	32372022	32410457	-0.115	Tam,Ful,JQ1	protein_coding	chr1	3231099732308510	3231595032309770	chr1	ENSG00000203620	32307620	32321169	-	JQ1	0.441	2	GH01J031845,GH01J031842	11.2269930702611,11.2161398569303	Sense	32410457	32321169	89288	ENSG00000203620-PTP4A2
SOCS3	ENSG00000184557	2	-	76352864	76356158	-0.135	Ful,JQ1	protein_coding	chr17	7634600176364480	7635789076383390	chr17	ENSG00000266970	76356534	76369992	+	JQ1	-1.749	5	GH17J078349,GH17J078368	624.704034071247,26.9944677280544	Antisense	76356158	76356534	-376	ENSG00000266970-SOCS3
TMEM105	ENSG00000185332	3	-	79285074	79304474	-1.121	JQ1	protein_coding	chr17	79281820	79285628	chr17	ENSG00000185168	79277571	79283048	-	JQ1	-1.907	4	GH17J081308	16.1383	Sense	79304474	79283048	21426	ENSG00000185168-TMEM105
NR2F2	ENSG00000185551	3	+	96869167	96883492	-0.377	Tam,Ful,JQ1	protein_coding	chr15	9.69054e+103	9.69056e+103	chr15	ENSG00000259275	96897466	96947033	+	JQ1	-0.671	2	GH15J096362,GH15J096366,GH15J096368,GH15J096364,GH15J096319,GH15J096381,GH15J096319,GH15J096392,GH15J096395,GH15J096363,GH15J096365,GH15J096390,GH15J096361	11.7212035385177,11.7212035385177,11.4820849319226,11.7090507494806,605.028166025618,10.3547293192295,605.028166025618,10.6402646328554,11.160509180143,11.7212035385177,11.7212035385177,10.5848078721104,11.7212035385177	Sense	96869167	96897466	-28299	ENSG00000259275-NR2F2
TLCD2	ENSG00000185561	4	-	1611064	1613732	-0.6	JQ1	protein_coding	chr17	16124941615548	16154951622588	chr17	ENSG00000186594	1614787	1620468	-	JQ1	1.117	4	GH17J001709,GH17J001712	600.665628627291,13.081614213588	Sense	1613732	1620468	-6736	ENSG00000186594-TLCD2
GLDN	ENSG00000186417	10	+	51633826	51700210	0.103	Ful,JQ1	protein_coding	chr15	5160971351605820	5161225251609320	chr15	ENSG00000259306	51608038	51614193	+	JQ1	-1.794	3	GH15J051317,GH15J051314	27.987755419731,16.0880899585322	Sense	51633826	51608038	25788	ENSG00000259306-GLDN
ZNF397	ENSG00000186812	6	+	32820994	32847097	0.562	JQ1	protein_coding	chr18	32868764	32871565	chr18	ENSG00000268573	32860831	32870165	-	JQ1	-1.05	2	GH18J035289	31.3433	Antisense	32820994	32870165	-49171	ENSG00000268573-ZNF397
ZSCAN30	ENSG00000186814	9	-	32831032	32870196	-0.362	JQ1	protein_coding	chr18	3.28468e+23	3.28486e+23	chr18	ENSG00000274184	32848182	32850202	+	JQ1	2.793	1	GH18J035266,GH18J035268,GH18J035289	11.9499142061299,11.9499142061299,605.156299734241	Antisense	32870196	32848182	22014	ENSG00000274184-ZSCAN30
HEXIM1	ENSG00000186834	1	+	43224684	43229468	0.748	Tam,Ful,JQ1	protein_coding	chr17	43220517	43230110	chr17	ENSG00000276728	43224097	43225837	-	JQ1	-1.672	1	GH17J045143	630.084	Antisense	43224684	43225837	-1153	ENSG00000276728-HEXIM1
NAP1L1	ENSG00000187109	16	-	76438670	76478813	0.165	JQ1	protein_coding	chr12	7.66676e+31	7.66744e+31	chr12	ENSG00000257219	76653619	76698911	+	Tam	-20.095	4	GH12J076274,GH12J076264,GH12J076258,GH12J076288	4.69356209461074,5.79657608380909,4.33787634999724,5.02279557549972	Antisense	76478813	76653619	-174806	ENSG00000257219-NAP1L1
CMC1	ENSG00000187118	4	+	28283075	28366633	0.347	JQ1	protein_coding	chr3	2805089428049660	2805126028050040	chr3	ENSG00000235493	28038701	28070095	-	JQ1	-0.618	3	GH03J028009,GH03J028008	1.6625443905499,2.2268906153891	Antisense	28283075	28070095	212980	ENSG00000235493-CMC1
SAMD11	ENSG00000187634	14	+	860260	879955	0.077	Tam,Ful,JQ1	protein_coding	chr1	839380	841200	chr1	ENSG00000272438	840214	851356	+	JQ1	-1.781	2	GH01J000904	6.88954	Sense	860260	840214	20046	ENSG00000272438-SAMD11
THSD4	ENSG00000187720	18	+	71389291	72075722	0.321	Tam,Ful,Nutlin	protein_coding	chr15	7137069971370690	7137433971374330	chr15	LncRNA438	71371963	71372333	+	Tam,Ful,JQ1,Nutlin-3	-0.166	2	GH15J071078,GH15J071078	2.95048470494399,2.95048470494399	Sense	71389291	71371963	17328	LncRNA438-THSD4
UBQLN2	ENSG00000188021	1	+	56590026	56593443	0.329	JQ1	protein_coding	chrX	5.60074e+31	5.60078e+31	chrX	ENSG00000227486	55934556	56041606	+	JQ1	-1.258	2	GH0XJ055981,GH0XJ055997,GH0XJ055907,GH0XJ056000	5.95927448021608,5.46875435299213,3.37356579732498,5.95678069980673	Sense	56590026	55934556	655470	ENSG00000227486-UBQLN2
ZNF626	ENSG00000188171	5	-	20802867	20844402	0.731	JQ1	protein_coding	chr19	2084220620793670	2084580620797060	chr19	ENSG00000269110	20736598	20844389	-	Tam	15.694	5	GH19J020660,GH19J020610	610.172900357693,8.03879127191182	Sense	20844402	20844389	13	ENSG00000269110-ZNF626
SBK1	ENSG00000188322	4	+	28303840	28335170	-0.409	JQ1	protein_coding	chr16	28301921	28306522	chr16	ENSG00000246465	28296206	28303385	-	JQ1	-1.236	2	GH16J028292	600.303	Antisense	28303840	28303385	455	ENSG00000246465-SBK1
NDOR1	ENSG00000188566	14	+	140100147	140111461	-0.293	Ful	protein_coding	chr9	140021081	140025188	chr9	LncRNA1437	140023111	140024679	-	JQ1	-0.277	1	GH09J137126	34.9262	Antisense	140100147	140024679	75468	LncRNA1437-NDOR1
MPHOSPH8	ENSG00000196199	14	+	20207788	20247599	0.196	Tam,JQ1	protein_coding	chr13	20434748	20439741	chr13	ENSG00000275964	20437998	20439188	+	Ful,JQ1	-0.082	1	GH13J019860	21.2036	Sense	20207788	20437998	-230210	ENSG00000275964-MPHOSPH8
LCOR	ENSG00000196233	9	+	98592017	98740800	0.315	JQ1	protein_coding	chr10	98589799	98594758	chr10	LncRNA220	98590323	98591862	-	JQ1	-0.745	1	GH10J096830	612.357	Antisense	98592017	98591862	155	LncRNA220-LCOR
PPIA	ENSG00000196262	6	+	44836279	44864163	0.3	JQ1	protein_coding	chr7	44834799	44839200	chr7	LncRNA1262	44834797	44835979	-	JQ1	-0.87	1	GH07J044795	609.129	Antisense	44836279	44835979	300	LncRNA1262-PPIA
WDR5	ENSG00000196363	14	+	137000487	137025093	-0.25	Tam,Ful	protein_coding	chr9	137033536	137036130	chr9	ENSG00000273473	137033891	137034462	+	JQ1	-1.728	1	GH09J134168	5.53802	Sense	137000487	137033891	-33404	ENSG00000273473-WDR5
PTPN1	ENSG00000196396	10	+	49126891	49201299	0.616	JQ1	protein_coding	chr20	4890743048918270	4891448248930730	chr20	ENSG00000203999	48909257	48931459	+	JQ1	-2.638	5	GH20J050291,GH20J050301	6.99832540947851,27.6228594285655	Sense	49126891	48909257	217634	ENSG00000203999-PTPN1
ZNF124	ENSG00000196418	4	-	247285277	247335318	0.046	Tam,Ful,JQ1	protein_coding	chr1	247333102	247335903	chr1	LncRNA91	247335650	247335813	+	JQ1	1.57	2	GH01J247170	621.177	Antisense	247335318	247335650	-332	LncRNA91-ZNF124
TSC22D2	ENSG00000196428	5	+	150126122	150184218	0.479	JQ1	protein_coding	chr3	1.49991e+17	1.49992e+17	chr3	ENSG00000243550	149983199	150005160	-	JQ1	-2.958	3	GH03J150273,GH03J150277	6.0739416147594,10.4111046454173	Antisense	150126122	150005160	120962	ENSG00000243550-TSC22D2
C20orf96	ENSG00000196476	11	-	251504	271390	-0.296	JQ1	protein_coding	chr20	246841	248290	chr20	ENSG00000272874	247827	249498	+	Ful	1.898	1	GH20J000266	13.0847	Antisense	271390	247827	23563	ENSG00000272874-C20orf96
XRCC2	ENSG00000196584	3	-	152341864	152373250	-0.331	Ful	protein_coding	chr7	152159285	152162886	chr7	ENSG00000261455	152160871	152162634	+	JQ1	0.36	1	GH07J152462	10.9678	Antisense	152373250	152160871	212379	ENSG00000261455-XRCC2
ZFP62	ENSG00000196670	4	-	180274611	180288286	-0.42	JQ1	protein_coding	chr5	180255600	180260601	chr5	ENSG00000245060	180257957	180262726	+	JQ1	-0.701	3	GH05J180828	8.66818	Antisense	180288286	180257957	30329	ENSG00000245060-ZFP62
AMZ2	ENSG00000196704	8	+	66243715	66253297	-0.245	JQ1	protein_coding	chr17	66200542	66204142	chr17	ENSG00000274712	66201630	66203634	+	JQ1	-1.041	1	GH17J068204	600.666	Sense	66243715	66201630	42085	ENSG00000274712-AMZ2
VKORC1L1	ENSG00000196715	3	+	65338254	65424550	-0.187	Tam,Ful	protein_coding	chr7	6.5209e+47	6.52122e+47	chr7	ENSG00000272693	65111924	65235797	-	JQ1	0.986	10	GH07J065745,GH07J065699,GH07J065731,GH07J065749,GH07J065769,GH07J065762	33.5373433624241,19.0679894643538,23.2124934904982,635.095049044878,35.3500814792431,22.3535507264099	Antisense	65338254	65235797	102457	ENSG00000272693-VKORC1L1
ZNF100	ENSG00000197020	8	-	21905568	21950430	0.386	JQ1	protein_coding	chr19	2197644821972020	2197674421973330	chr19	ENSG00000268184	21951574	21976662	-	Tam	-16.887	2	GH19J021793,GH19J021789	11.8225864803585,40.3326801276883	Sense	21950430	21976662	-26232	ENSG00000268184-ZNF100
ZNF785	ENSG00000197162	4	-	30585061	30597092	-0.236	JQ1	protein_coding	chr16	30644727	30646889	chr16	LncRNA499	30645883	30646919	+	Tam,Ful	-0.365	1	GH16J030633	22.4023	Antisense	30597092	30645883	-48791	LncRNA499-ZNF785
TBC1D9B	ENSG00000197226	22	-	179289066	179334859	-0.218	JQ1	protein_coding	chr5	179284400	179287646	chr5	ENSG00000245317	179286013	179288283	+	JQ1	-0.465	2	GH05J179857	26.3128	Antisense	179334859	179286013	48846	ENSG00000245317-TBC1D9B
GATA3-AS1	ENSG00000197308	3	-	8092413	8095447	-0.223	Ful,JQ1	lincRNA	chr10	8090701	8107026	chr10	ENSG00000232638	8093504	8095047	+	Tam,Ful,JQ1	0.222	3	GH10J008051	600.666	Antisense	8095447	8093504	1943	ENSG00000232638-GATA3-AS1
MRPL21	ENSG00000197345	7	-	68658744	68671303	0.011	Ful,JQ1	protein_coding	chr11	6863946968637060	6864086868638460	chr11	ENSG00000250508	68638132	68642010	+	JQ1	-1.62	2	GH11J068872,GH11J068869	11.9763992992521,11.9763992992521	Antisense	68671303	68638132	33171	ENSG00000250508-MRPL21
SLC2A10	ENSG00000197496	5	+	45338126	45364965	-0.162	Tam,Ful,JQ1	protein_coding	chr20	45367888	45369115	chr20	LncRNA846	45368673	45368846	+	JQ1	-1.612	2	GH20J046739	16.6806	Sense	45338126	45368673	-30547	LncRNA846-SLC2A10
ZNF823	ENSG00000197933	4	-	11832080	11849824	0.343	JQ1	protein_coding	chr19	11749616	11751815	chr19	ENSG00000197332	11750591	11797384	+	JQ1	1.206	10	GH19J011639	11.0532	Antisense	11849824	11750591	99233	ENSG00000197332-ZNF823
NOL8	ENSG00000198000	18	-	95059640	95087918	-0.151	Tam,Ful,JQ1	protein_coding	chr9	94907883	94911436	chr9	ENSG00000225511	94903580	94922396	+	JQ1	-1.653	6	GH09J092145	29.7623	Antisense	95087918	94903580	184338	ENSG00000225511-NOL8
ZNF335	ENSG00000198026	28	-	44577292	44600833	-0.791	JQ1	protein_coding	chr20	44561639	44568134	chr20	LncRNA1709	44561744	44562965	-	Ful,JQ1	0.73	1	GH20J045933	25.9779	Sense	44600833	44562965	37868	LncRNA1709-ZNF335
HOXC4	ENSG00000198353	4	+	54410715	54449813	-2.294	JQ1	protein_coding	chr12	54365605	54428586	chr12	ENSG00000260597	54413694	54416373	+	JQ1	-1.034	1	GH12J053971	609.648	Sense	54410715	54413694	-2979	ENSG00000260597-HOXC4
PIM3	ENSG00000198355	6	+	50354161	50357728	0.393	JQ1	protein_coding	chr22	50322048	50333344	chr22	ENSG00000278869	50326846	50327722	-	JQ1	-1.994	1	GH22J049927	16.6932	Antisense	50354161	50327722	26439	ENSG00000278869-PIM3
TMA16	ENSG00000198498	7	+	164415594	164441691	-0.598	Tam,Ful,JQ1	protein_coding	chr4	164449185	164451094	chr4	ENSG00000273449	164450923	164451849	+	Tam,Ful	-1.262	1	GH04J163528	5.60496	Sense	164415594	164450923	-35329	ENSG00000273449-TMA16
ZNF627	ENSG00000198551	5	+	11670189	11729950	0.201	JQ1	protein_coding	chr19	11749616	11751815	chr19	ENSG00000197332	11750591	11797384	+	JQ1	1.206	10	GH19J011639	34.1959	Sense	11670189	11750591	-80402	ENSG00000197332-ZNF627
SLC34A3	ENSG00000198569	13	+	140125209	140131006	-0.108	Ful,JQ1	protein_coding	chr9	140115452	140127156	chr9	LncRNA1869	140116875	140117887	-	JQ1	-1.42	1	GH09J137221	5.85239	Antisense	140125209	140117887	7322	LncRNA1869-SLC34A3
MMP17	ENSG00000198598	10	+	132312938	132336328	0.183	Ful,JQ1	protein_coding	chr12	132344299	132349032	chr12	ENSG00000256955	132341965	132349083	+	Ful,JQ1	-1.203	3	GH12J131859	12.5408	Sense	132312938	132341965	-29027	ENSG00000256955-MMP17
CALM1	ENSG00000198668	7	+	90862846	90874605	0.638	JQ1	protein_coding	chr14	9084665690853320	9085249090855940	chr14	ENSG00000275198	90849709	90854317	+	JQ1	-0.424	1	GH14J090380,GH14J090386	6.35190248322625,5.67849057356009	Sense	90862846	90849709	13137	ENSG00000275198-CALM1
PAPSS2	ENSG00000198682	13	+	89419370	89507462	-0.365	Ful,JQ1	protein_coding	chr10	8.94163e+95	8.9423e+95	chr10	ENSG00000225913	89367742	89419036	+	Ful,JQ1	-17.159	4	GH10J087656,GH10J087639,GH10J087634,GH10J087627,GH10J087640,GH10J087654,GH10J087615,GH10J087608,GH10J087618,GH10J087622,GH10J087643,GH10J087625	609.015876228703,8.98243388670762,22.3545622319971,12.0078933529024,9.00830654809421,4.97563162897324,11.1804403439463,11.1749953865903,23.1272080782989,11.3802988143779,11.7454020925858,21.9102404634623	Sense	89419370	89367742	51628	ENSG00000225913-PAPSS2
ECI2	ENSG00000198721	11	-	4115923	4135831	-0.272	JQ1	protein_coding	chr6	4133575	4137353	chr6	ENSG00000234817	4136306	4157619	+	JQ1	2.182	4	GH06J004133	609.595	Antisense	4135831	4136306	-475	ENSG00000234817-ECI2
DENND4B	ENSG00000198837	28	-	153901977	153919172	-0.634	JQ1	protein_coding	chr1	153948266	153951644	chr1	ENSG00000272654	153950219	153951636	+	JQ1	-0.755	1	GH01J153975	15.5878	Antisense	153919172	153950219	-31047	ENSG00000272654-DENND4B
RNA5SP283	ENSG00000202474	1	-	66458144	66458262	-2.131	JQ1	rRNA	chr9	66454657	66459425	chr9	ENSG00000238113	66457285	66469310	+	JQ1	-1.505	5	GH09J062799	600.666	Antisense	66458262	66457285	977	ENSG00000238113-RNA5SP283
ERICH2	ENSG00000204334	5	+	171640296	171655481	1.031	JQ1	protein_coding	chr2	171626299	171628911	chr2	ENSG00000239467	171627623	171634658	+	JQ1	0.448	5	GH02J170769	600.666	Sense	171640296	171627623	12673	ENSG00000239467-ERICH2
SKIV2L	ENSG00000204351	28	+	31926857	31937532	0.176	JQ1	protein_coding	chr6	31365777	31372978	chr6	LncRNA1193	31365836	31366274	-	JQ1	-1.1	2	GH06J031399	34.4433	Antisense	31926857	31366274	560583	LncRNA1193-SKIV2L
MICB	ENSG00000204516	6	+	31462658	31478901	-0.041	Ful,JQ1	protein_coding	chr6	31365777	31372978	chr6	LncRNA1193	31365836	31366274	-	JQ1	-1.1	2	GH06J031399	18.8585	Antisense	31462658	31366274	96384	LncRNA1193-MICB
MICA	ENSG00000204520	6	+	31371356	31383092	0.684	JQ1	protein_coding	chr6	31365777	31372978	chr6	LncRNA1193	31365836	31366274	-	JQ1	-1.1	2	GH06J031399	629.316	Antisense	31371356	31366274	5082	LncRNA1193-MICA
DDR1	ENSG00000204580	21	+	30844198	30867933	-0.2	Tam,JQ1	protein_coding	chr6	3.07781e+47	3.0784e+47	chr6	ENSG00000214894	30766431	30798436	-	Tam,JQ1	-1.058	2	GH06J030810,GH06J030826,GH06J030798,GH06J030802,GH06J030816,GH06J030806	31.6497028658258,31.7385639791562,30.2060711071818,30.2205069346219,32.1203236873898,19.820577216902	Antisense	30844198	30798436	45762	ENSG00000214894-DDR1
TRIM39	ENSG00000204599	9	+	30294256	30311506	-0.357	JQ1	protein_coding	chr6	3028941130226170	3029597830228770	chr6	ENSG00000270604	30201816	30293911	-	JQ1	1.949	5	GH06J030321,GH06J030258	615.742065062718,37.0993139939618	Antisense	30294256	30293911	345	ENSG00000270604-TRIM39
TBC1D8	ENSG00000204634	20	-	101624079	101869328	0.633	Tam,Ful,JQ1	protein_coding	chr2	101764847	101770036	chr2	ENSG00000272902	101768122	101771874	+	Ful,JQ1	-0.311	2	GH02J101148	5.97715	Antisense	101869328	101768122	101206	ENSG00000272902-TBC1D8
TRIM27	ENSG00000204713	9	-	28870779	28891766	-0.272	Tam,Ful	protein_coding	chr6	28804777	28807778	chr6	ENSG00000225173	28805646	28806783	-	JQ1	1.253	2	GH06J028838	43.0347	Sense	28891766	28806783	84983	ENSG00000225173-TRIM27
CALML3-AS1	ENSG00000205488	4	-	5556207	5568209	-0.78	Ful,JQ1	antisense	chr10	55173645527999	55235625532494	chr10	LncRNA183	5523450	5528597	-	Tam,Ful,JQ1	-0.471	3	GH10J005476,GH10J005486	17.9463395024606,17.4319899012921	Sense	5568209	5528597	39612	LncRNA183-CALML3-AS1
RNPS1	ENSG00000205937	9	-	2303117	2318413	-0.027	Tam,Ful,JQ1	protein_coding	chr16	2316201	2320402	chr16	ENSG00000260778	2318156	2323419	+	JQ1	0.609	3	GH16J002266	621.295	Antisense	2318413	2318156	257	ENSG00000260778-RNPS1
HCP5	ENSG00000206337	3	+	31368479	31445283	1.609	JQ1	sense_overlapping	chr6	31365777	31372978	chr6	LncRNA1193	31365836	31366274	-	JQ1	-1.1	2	GH06J031399	600.666	Antisense	31368479	31366274	2205	LncRNA1193-HCP5
SNORA70E	ENSG00000207221	1	-	82752506	82752640	-18.944	Tam,Ful,JQ1	snoRNA	chr11	82779996	82785527	chr11	ENSG00000246067	82783108	82817761	+	JQ1	-0.606	4	GH11J083068	10.4529	Antisense	82752640	82783108	-30468	ENSG00000246067-SNORA70E
SNORA64	ENSG00000207405	1	-	2012974	2013107	15.928	Ful	snoRNA	chr16	2008602	2016602	chr16	ENSG00000255198	2014960	2015510	+	JQ1	0.464	2	GH16J001958	642.496	Antisense	2013107	2014960	-1853	ENSG00000255198-SNORA64
IGHE	ENSG00000211891	4	-	106064224	106068065	-2.183	JQ1	IG_C_gene	chr14	106068275	106070937	chr14	ENSG00000254140	106067809	106071694	-	JQ1	-2.615	2	GH14J105601	600.666	Sense	106068065	106071694	-3629	ENSG00000254140-IGHE
RNF208	ENSG00000212864	2	-	140114707	140116033	-1.888	JQ1	protein_coding	chr9	140115452	140127156	chr9	LncRNA1869	140116875	140117887	-	JQ1	-1.42	1	GH09J137221	7.20963	Sense	140116033	140117887	-1854	LncRNA1869-RNF208
QTRT1	ENSG00000213339	10	+	10812106	10824113	-0.219	Ful,JQ1	protein_coding	chr19	10762330	10768077	chr19	ENSG00000267100	10762538	10764520	-	JQ1	-0.981	1	GH19J010651	9.96129	Antisense	10812106	10764520	47586	ENSG00000267100-QTRT1
CPNE1	ENSG00000214078	18	-	34213953	34252878	0.546	JQ1	protein_coding	chr20	34635322	34640339	chr20	ENSG00000260032	34633544	34638882	-	JQ1	0.238	1	GH20J036048	33.8003	Sense	34252878	34638882	-386004	ENSG00000260032-CPNE1
NUTM2D	ENSG00000214562	7	+	89117425	89130452	1.032	JQ1	protein_coding	chr10	89100157	89104758	chr10	ENSG00000224914	89102493	89117639	+	Ful,JQ1	0.709	5	GH10J087341	612.325	Sense	89117425	89102493	14932	ENSG00000224914-NUTM2D
ZNF407	ENSG00000215421	8	+	72265106	72777627	-0.386	JQ1	protein_coding	chr18	72262291	72266671	chr18	ENSG00000264247	72259010	72265744	-	JQ1	-0.87	2	GH18J074595	614.562	Antisense	72265106	72265744	-638	ENSG00000264247-ZNF407
NBPF1	ENSG00000219481	29	-	16888814	16940057	-0.465	Tam,Ful	protein_coding	chr1	16839201	16841896	chr1	ENSG00000261135	16841140	16842249	+	JQ1	-0.477	1	GH01J016512	10.8761	Antisense	16940057	16841140	98917	ENSG00000261135-NBPF1
MIR503HG	ENSG00000223749	3	-	133677367	133680741	-1.257	Tam,Ful,JQ1	lincRNA	chrX	133676002	133688431	chrX	ENSG00000227060	133684003	133693953	+	JQ1	-1.471	3	GH0XJ134541	604.622	Antisense	133680741	133684003	-3262	ENSG00000227060-MIR503HG
JPX	ENSG00000225470	6	+	73164159	73290243	-0.454	JQ1	lincRNA	chrX	7.3193e+39	7.32018e+39	chrX	ENSG00000230590	73166390	73513409	-	Tam,Ful,JQ1	0.201	8	GH0XJ073974,GH0XJ074062,GH0XJ073943,GH0XJ073955,GH0XJ073947	35.034827217156,35.0949702349675,670.561311482137,35.1165602249375,19.3717469976478	Antisense	73164159	73513409	-349250	ENSG00000230590-JPX
FAM225B	ENSG00000225684	3	-	115865618	115873780	-0.922	JQ1	lincRNA	chr9	115874680	115876281	chr9	ENSG00000231528	115875353	115882208	+	JQ1	-1.427	3	GH09J113113	608.004	Antisense	115873780	115875353	-1573	ENSG00000231528-FAM225B
MIAT	ENSG00000225783	6	+	27042392	27072438	-1.504	Ful	lincRNA	chr22	27064901	27072192	chr22	ENSG00000244625	27068730	27176170	+	JQ1	-0.926	6	GH22J026668	18.0212	Sense	27042392	27068730	-26338	ENSG00000244625-MIAT
ELFN1	ENSG00000225968	3	+	1727755	1787590	-2.138	JQ1	protein_coding	chr7	1615353	1617345	chr7	ENSG00000230487	1609709	1629262	+	Tam,Ful,JQ1	0.107	6	GH07J001575	4.35155	Sense	1727755	1609709	118046	ENSG00000230487-ELFN1
HAR1A	ENSG00000225978	2	+	61733483	61735738	-1.955	JQ1	lincRNA	chr20	61732753	61734753	chr20	ENSG00000231133	61726845	61733671	-	JQ1	-0.712	3	GH20J063101	612.324	Antisense	61733483	61733671	-188	ENSG00000231133-HAR1A
ITGB2-AS1	ENSG00000227039	5	+	46340966	46349593	-1.369	JQ1	antisense	chr21	46336141	46353716	chr21	ENSG00000183250	46352729	46359828	-	JQ1	-0.534	4	GH21J044916	614.126	Antisense	46340966	46359828	-18862	ENSG00000183250-ITGB2-AS1
LINC00629	ENSG00000227060	3	+	133684003	133693953	-1.471	JQ1	lincRNA	chrX	133676002	133688431	chrX	ENSG00000223749	133677367	133680662	-	Tam,Ful,JQ1	-1.257	3	GH0XJ134541	600.666	Antisense	133684003	133680662	3341	ENSG00000223749-LINC00629
CCT6P1	ENSG00000228409	14	+	65216129	65228341	-0.468	Ful	pseudogene	chr7	65214587	65217988	chr7	ENSG00000272693	65111924	65235797	-	JQ1	0.986	10	GH07J065749	607.332	Antisense	65216129	65235797	-19668	ENSG00000272693-CCT6P1
HOTAIR	ENSG00000228630	7	-	54356092	54368740	-1.493	JQ1	antisense	chr12	54365605	54428586	chr12	ENSG00000260597	54413694	54416373	+	JQ1	-1.034	1	GH12J053971	621.566	Antisense	54368740	54413694	-44954	ENSG00000260597-HOTAIR
LINC01128	ENSG00000228794	6	+	762988	794826	0.741	JQ1	processed_transcript	chr1	760980	764581	chr1	ENSG00000230021	521369	763176	-	JQ1	-0.88	6	GH01J000826	15.6473	Antisense	762988	763176	-188	ENSG00000230021-LINC01128
ANKRD10-IT1	ENSG00000229152	2	-	111547406	111551519	0.558	JQ1	sense_intronic	chr13	111520952	111524994	chr13	ENSG00000255874	111516334	111522598	-	JQ1	-1.993	1	GH13J110868	16.6461	Sense	111551519	111522598	28921	ENSG00000255874-ANKRD10-IT1
DPY19L1P1	ENSG00000229358	22	-	32620561	32801399	-0.733	JQ1	pseudogene	chr7	32801012	32802812	chr7	ENSG00000281332	32799891	32802536	+	Ful	-0.4	1	GH07J032762	622.124	Antisense	32801399	32799891	1508	ENSG00000281332-DPY19L1P1
ZNF688	ENSG00000229809	3	-	30580667	30584055	-0.89	JQ1	protein_coding	chr16	30644727	30646889	chr16	LncRNA499	30645883	30646919	+	Tam,Ful	-0.365	1	GH16J030633	14.0553	Antisense	30584055	30645883	-61828	LncRNA499-ZNF688
FTX	ENSG00000230590	8	-	73183790	73513409	0.201	Tam,Ful,JQ1	lincRNA	chrX	7316303673193030	7316643673201830	chrX	ENSG00000225470	73164019	73290243	+	JQ1	-0.454	6	GH0XJ073943,GH0XJ073974	63.0667420334141,17.6874445099668	Antisense	73513409	73164019	349390	ENSG00000225470-FTX
HCG18	ENSG00000231074	5	-	30255174	30294927	-0.633	JQ1	antisense	chr6	3.0231e+55	3.02334e+55	chr6	ENSG00000270604	30201816	30293911	-	JQ1	1.949	5	GH06J030263,GH06J030286,GH06J030321,GH06J030289,GH06J030308,GH06J030258,GH06J030310	4.60890974541258,4.41242824002512,667.563741417764,600.285450047702,17.4034712753199,30.4119808973336,24.0294773396772	Sense	30294927	30293911	1016	ENSG00000270604-HCG18
HAR1B	ENSG00000231133	3	-	61726845	61733671	-0.712	JQ1	lincRNA	chr20	61732753	61734753	chr20	ENSG00000225978	61733557	61735738	+	JQ1	-1.955	2	GH20J063101	616.603	Antisense	61733671	61733557	114	ENSG00000225978-HAR1B
FAM225A	ENSG00000231528	3	+	115875353	115882208	-1.427	JQ1	lincRNA	chr9	115872880	115874481	chr9	ENSG00000225684	115865618	115873780	-	JQ1	-0.922	3	GH09J113111	600.666	Antisense	115875353	115873780	1573	ENSG00000225684-FAM225A
RNF224	ENSG00000233198	3	+	140122018	140124090	0.112	Tam,Ful,JQ1	protein_coding	chr9	140115452	140127156	chr9	LncRNA1869	140116875	140117887	-	JQ1	-1.42	1	GH09J137221	606.529	Antisense	140122018	140117887	4131	LncRNA1869-RNF224
TRIM26	ENSG00000234127	10	-	30152232	30181204	0.217	Ful,JQ1	protein_coding	chr6	3.02894e+23	3.0296e+23	chr6	ENSG00000270604	30201816	30293911	-	JQ1	1.949	5	GH06J030321,GH06J030233,GH06J030258	13.7607167398842,9.68184445368633,10.6433179794392	Sense	30181204	30293911	-112707	ENSG00000270604-TRIM26
CDKN2AIPNL	ENSG00000237190	3	-	133737778	133747589	-0.202	Ful,JQ1	protein_coding	chr5	1.33844e+17	1.33849e+17	chr5	ENSG00000251169	133842243	133844920	+	JQ1	-2.812	2	GH05J134508,GH05J134503	11.6547104302233,11.2930411504594	Antisense	133747589	133842243	-94654	ENSG00000251169-CDKN2AIPNL
ZNF737	ENSG00000237440	5	-	20718631	20748615	0.674	Ful,JQ1	protein_coding	chr19	20747006	20749434	chr19	ENSG00000269110	20736598	20844389	-	Tam	15.694	5	GH19J020564	608.416	Sense	20748615	20844389	-95774	ENSG00000269110-ZNF737
SLC25A24P1	ENSG00000241361	8	+	108815565	108918572	-1.391	Tam,Ful,JQ1	pseudogene	chr1	108815022	108816623	chr1	ENSG00000238122	108803818	108816311	-	Tam,Ful,JQ1	-1.354	2	GH01J108272	600.666	Antisense	108815565	108816311	-746	ENSG00000238122-SLC25A24P1
PI4KA	ENSG00000241973	55	-	21061979	21213705	0.249	JQ1	protein_coding	chr22	21302253	21313089	chr22	ENSG00000237476	21311380	21318967	+	JQ1	-1.731	2	GH22J020947	22.6617	Antisense	21213705	21311380	-97675	ENSG00000237476-PI4KA
FAM86DP	ENSG00000244026	8	-	75470703	75484261	-0.111	Tam,Ful,JQ1	pseudogene	chr3	75481515	75486152	chr3	ENSG00000272690	75484499	75506637	+	Ful,JQ1	0.025	4	GH03J075432	611.071	Antisense	75484261	75484499	-238	ENSG00000272690-FAM86DP
NR2F2-AS1	ENSG00000247809	7	-	96670598	96870590	-1.727	JQ1	antisense	chr15	9686290296862900	9690479196904790	chr15	ENSG00000259275	96897466	96947033	+	JQ1	-0.671	2	GH15J096319,GH15J096319	600.409541965818,600.409541965818	Antisense	96870590	96897466	-26876	ENSG00000259275-NR2F2-AS1
ZNF324B	ENSG00000249471	5	+	58962971	58969200	-0.331	Tam,Ful,JQ1	protein_coding	chr19	58911567	58913968	chr19	ENSG00000268307	58911588	58912046	+	Ful	1.464	1	GH19J058400	21.1457	Sense	58962971	58911588	51383	ENSG00000268307-ZNF324B
PKD1P6	ENSG00000250251	24	-	15219099	15248421	0.444	JQ1	pseudogene	chr16	15246057	15249658	chr16	ENSG00000257391	15248760	15250877	+	JQ1	1.039	1	GH16J015153	600.666	Antisense	15248421	15248760	-339	ENSG00000257391-PKD1P6
HOXC-AS1	ENSG00000250451	2	-	54392806	54393794	-0.89	JQ1	antisense	chr12	54365605	54428586	chr12	ENSG00000260597	54413694	54416373	+	JQ1	-1.034	1	GH12J053971	615.314	Antisense	54393794	54413694	-19900	ENSG00000260597-HOXC-AS1
FAM86HP	ENSG00000253540	8	-	129817935	129830315	0.564	JQ1	pseudogene	chr3	129828719	129832443	chr3	ENSG00000249846	129831393	129839422	+	Tam,Ful,JQ1	0.231	3	GH03J130109	626.32	Antisense	129830315	129831393	-1078	ENSG00000249846-FAM86HP
LSM14A	ENSG00000257103	11	+	34663409	34720420	-0.163	JQ1	protein_coding	chr19	34394924	34398705	chr19	ENSG00000277013	34397257	34399296	+	Tam,Ful,JQ1	-0.334	1	GH19J033904	25.9535	Sense	34663409	34397257	266152	ENSG00000277013-LSM14A
NHLRC4	ENSG00000257108	2	+	616996	619495	-2.262	JQ1	protein_coding	chr16	573999	581583	chr16	ENSG00000277142	575155	577407	-	JQ1	-0.612	1	GH16J000523	14.2786	Antisense	616996	577407	39589	ENSG00000277142-NHLRC4
FNBP1P1	ENSG00000257800	2	+	74347807	74350345	-0.743	JQ1	pseudogene	chr2	74346708	74348327	chr2	LncRNA787	74345366	74347695	-	Ful	0.461	1	GH02J074119	654.406	Antisense	74347807	74347695	112	LncRNA787-FNBP1P1
LINC00592	ENSG00000258279	5	+	52604714	52617588	-2.192	JQ1	lincRNA	chr12	52590464	52612969	chr12	ENSG00000257137	52599340	52607367	-	JQ1	-2.889	4	GH12J052196	606.632	Antisense	52604714	52607367	-2653	ENSG00000257137-LINC00592
ERVK13-1	ENSG00000260565	4	-	2710350	2723445	0.368	JQ1	processed_transcript	chr16	2508801	2511402	chr16	ENSG00000260874	2506253	2509980	-	JQ1	-1.574	5	GH16J002460	18.7631	Sense	2723445	2509980	213465	ENSG00000260874-ERVK13-1
BAHCC1	ENSG00000266074	28	+	79369275	79440126	0.567	Tam,Ful,JQ1	protein_coding	chr17	79358601	79381118	chr17	ENSG00000262223	79349801	79359160	-	Tam,Ful	1.608	5	GH17J081384	603.743	Antisense	79369275	79359160	10115	ENSG00000262223-BAHCC1
CROT	ENSG00000005469	19	+	86974997	87029111	1.524	Nutlin	protein_coding	chr7	8697231686959910	8697689186962560	chr7	ENSG00000182165	86954541	86974831	-	Nutlin-3	0.938	4	GH07J087343,GH07J087331	600.665628627291,12.0833290358184	Antisense	86974997	86974831	166	ENSG00000182165-CROT
POLA2	ENSG00000014138	18	+	65029233	65073060	-3.449	Nutlin	protein_coding	chr11	65237559	65277672	chr11	ENSG00000251562	65265233	65273987	+	Nutlin-3	1.175	4	GH11J065470	167.909	Sense	65029233	65265233	-236000	ENSG00000251562-POLA2
BCLAF1	ENSG00000029363	15	-	136578001	136610989	-0.774	Nutlin	protein_coding	chr6	135817338	135820438	chr6	ENSG00000231028	135818939	136037193	+	Nutlin-3	-2.594	5	GH06J135496	38.7509	Antisense	136610989	135818939	792050	ENSG00000231028-BCLAF1
ZNF516	ENSG00000101493	8	-	74069644	74207146	0.966	Nutlin	protein_coding	chr18	7.42397e+71	7.42419e+71	chr18	ENSG00000263812	74240612	74322925	+	Nutlin-3	2.316	3	GH18J076527,GH18J076536,GH18J076545,GH18J076553,GH18J076558,GH18J076563,GH18J076568,GH18J076572,GH18J076570	5.68454563553247,10.2104746930602,13.7566269558897,17.7026082285838,18.2038678323874,26.442092203766,2.53353445930905,13.0981551746348,13.0878890365306	Antisense	74207146	74240612	-33466	ENSG00000263812-ZNF516
RPA1	ENSG00000132383	17	+	1732996	1803376	-0.913	Nutlin	protein_coding	chr17	1615548	1622588	chr17	ENSG00000186594	1614787	1620468	-	Nutlin-3	1.997	4	GH17J001712	36.3773	Antisense	1732996	1620468	112528	ENSG00000186594-RPA1
DUSP6	ENSG00000139318	3	-	89741009	89747048	1.924	Nutlin	protein_coding	chr12	89738338	89752213	chr12	ENSG00000274021	89744792	89747048	+	Nutlin-3	3.077	1	GH12J089345	617.814	Antisense	89747048	89744792	2256	ENSG00000274021-DUSP6
CDC42EP2	ENSG00000149798	2	+	65082289	65089900	-1.544	Nutlin	protein_coding	chr11	65237559	65277672	chr11	ENSG00000251562	65265233	65273987	+	Nutlin-3	1.175	4	GH11J065470	17.4493	Sense	65082289	65265233	-182944	ENSG00000251562-CDC42EP2
SF1	ENSG00000168066	14	-	64532078	64546258	-0.476	Nutlin	protein_coding	chr11	65182230	65202646	chr11	ENSG00000245532	65190245	65213011	+	Nutlin-3	1.461	3	GH11J065414	153.172	Antisense	64546258	65190245	-643987	ENSG00000245532-SF1
ZNF217	ENSG00000171940	6	-	52183604	52226446	0.883	Nutlin	protein_coding	chr20	52479283	52490515	chr20	LncRNA879	52480115	52481025	-	Nutlin-3	1.841	2	GH20J053862	1.33088	Sense	52226446	52481025	-254579	LncRNA879-ZNF217
SHMT1	ENSG00000176974	12	-	18231187	18266856	-0.901	Nutlin	protein_coding	chr17	18227715	18228715	chr17	ENSG00000267350	18227536	18229211	+	Nutlin-3	3.027	1	GH17J018324	22.6539	Antisense	18266856	18227536	39320	ENSG00000267350-SHMT1
JUN	ENSG00000177606	1	-	59246465	59249785	0.551	Nutlin	protein_coding	chr1	5.92273e+71	5.92317e+71	chr1	ENSG00000283445	59181281	59236967	+	Nutlin-3	0.981	7	GH01J058761,GH01J058739,GH01J058731,GH01J058726,GH01J058725,GH01J058724,GH01J058720,GH01J058721,GH01J058717	11.9202292708277,11.8451643204777,11.2576307761611,11.2479366438655,11.2479366438655,11.2479366438655,10.2345994694386,10.2345994694386,9.78236221082981	Antisense	59249785	59181281	68504	ENSG00000283445-JUN
SAMD11	ENSG00000187634	14	+	860260	879955	-0.858	Nutlin	protein_coding	chr1	812256	812315	chr1	ENSG00000230368	803451	812283	-	Nutlin-3	-1.13	4	GH01J000876	12.3377	Antisense	860260	812283	47977	ENSG00000230368-SAMD11
SULF2	ENSG00000196562	21	-	46285092	46415360	1.072	Nutlin	protein_coding	chr20	46988056	46989857	chr20	ENSG00000235621	46988693	46999372	+	Nutlin-3	2.261	5	GH20J048359	9.85325	Antisense	46415360	46988693	-573333	ENSG00000235621-SULF2
NEAT1	ENSG00000245532	3	+	65190245	65213011	1.461	Nutlin	lincRNA	chr11	65237559	65277672	chr11	ENSG00000251562	65265233	65273987	+	Nutlin-3	1.175	4	GH11J065470	67.8397	Sense	65190245	65265233	-74988	ENSG00000251562-NEAT1
MALAT1	ENSG00000251562	4	+	65265233	65273940	1.175	Nutlin	lincRNA	chr11	65206353	65217050	chr11	ENSG00000245532	65190245	65213011	+	Nutlin-3	1.461	3	GH11J065438	22.3321	Sense	65265233	65190245	74988	ENSG00000245532-MALAT1
GALNT4	ENSG00000257594	1	-	89913185	89920039	0.823	Nutlin	protein_coding	chr12	89738338	89752213	chr12	ENSG00000274021	89744792	89747048	+	Nutlin-3	3.077	1	GH12J089345	14.3968	Antisense	89920039	89744792	175247	ENSG00000274021-GALNT4
