# Supplementary material for: EPB41L4A-AS1 long noncoding RNA acts in both cis- and trans-acting transcriptional regulation and controls nucleolar biology
Source: bioRxiv preprint, doi:10.1101/2025.04.08.647803, version 3 (2025-11-16)
Supplement: Table S2 [file 647803_file04.xlsx]

## Sheet: EPB41L4A-AS1 KD - polyA
ID	Isoforms	Promoters	TCONS	Position	Strand	Manual	NonredundantExons	TotalLength	ExonicLength	ExonicRepetitive	ExonicUnique	FractionUnique	GencodeIDs	GencodeSymbols	GencodeTypes	Genes	/home/labs/ulitsky/alanm/MCF7-gapmer/AS1_EPB_L1NT/expression/RSEM_AS1_2_1_S18_expression.genes.results	/home/labs/ulitsky/alanm/MCF7-gapmer/AS1_EPB_L1NT/expression/RSEM_AS1_2_2_S19_expression.genes.results	/home/labs/ulitsky/alanm/MCF7-gapmer/AS1_EPB_L1NT/expression/RSEM_AS1_2_3_S20_expression.genes.results	/home/labs/ulitsky/alanm/MCF7-gapmer/AS1_EPB_L1NT/expression/RSEM_EPB3_1_S21_expression.genes.results	/home/labs/ulitsky/alanm/MCF7-gapmer/AS1_EPB_L1NT/expression/RSEM_EPB3_2_S22_expression.genes.results	/home/labs/ulitsky/alanm/MCF7-gapmer/AS1_EPB_L1NT/expression/RSEM_EPB3_3_S23_expression.genes.results	/home/labs/ulitsky/alanm/MCF7-gapmer/AS1_EPB_L1NT/expression/RSEM_L1_NT_1_S24_expression.genes.results	/home/labs/ulitsky/alanm/MCF7-gapmer/AS1_EPB_L1NT/expression/RSEM_L1_NT_2_S25_expression.genes.results	/home/labs/ulitsky/alanm/MCF7-gapmer/AS1_EPB_L1NT/expression/RSEM_L1_NT_3_S26_expression.genes.results	EPB41L4A-AS1.baseMean	EPB41L4A-AS1.log2FoldChange	EPB41L4A-AS1.stat	EPB41L4A-AS1.pvalue	EPB41L4A-AS1.padj	EPB41L4A.baseMean	EPB41L4A.log2FoldChange	EPB41L4A.stat	EPB41L4A.pvalue	EPB41L4A.padj
ENSG00000000003.14_2	5	4	[ENST00000373020.8_1, ENST00000494424.1_1, ENST00000496771.5_1, ENST00000612152.4_1, ENST00000614008.4_1]	chrX:99882105-99894988	-	-	10	12883	4535	391	4144	0.913782	ENST00000373020.8_1, ENST00000494424.1_1, ENST00000496771.5_1, ENST00000612152.4_1, ENST00000614008.4_1	TSPAN6	lncRNA, protein_coding	TSPAN6	9.13	11.47	9.02	14.36	16.81	12.7	12.97	14.08	12.59	327.055	-0.191839	-1.21902	0.222836	0.405841	327.055	0.176793	1.14194	0.253477	0.999983
ENSG00000000005.6_3	2	2	[ENST00000373031.5_2, ENST00000485971.1_1]	chrX:99839932-99854882	+	-	7	14950	1476	0	1476	1	ENST00000373031.5_2, ENST00000485971.1_1	TNMD	lncRNA, protein_coding	TNMD	0	0	0	0	0	0	0	0	0
ENSG00000000419.12_3	6	5	[ENST00000371582.8_2, ENST00000371584.8_2, ENST00000371588.9_1, ENST00000413082.1_1, ENST00000466152.5_1, ENST00000494752.1_1]	chr20:49551403-49575092	-	-	10	23689	1207	103	1104	0.914664	ENST00000371582.8_2, ENST00000371584.8_3, ENST00000371588.9_1, ENST00000413082.1_1, ENST00000466152.5_1, ENST00000494752.1_1	DPM1	lncRNA, protein_coding	DPM1	13.21	19.98	19.06	17.49	35.04	33	23.58	42.38	20.23	192.556	-0.473644	-1.74795	0.080473	0.20594	192.556	0.0343142	0.128426	0.897812	0.999983
ENSG00000000457.14_4	5	5	[ENST00000367770.5_2, ENST00000367771.11_3, ENST00000367772.8_2, ENST00000423670.1_1, ENST00000470238.1_1]	chr1:169818771-169863408	-	-	15	44637	6883	611	6272	0.911231	ENST00000367770.5_2, ENST00000367771.11_3, ENST00000367772.8_2, ENST00000423670.1_1, ENST00000470238.1_1	SCYL3	lncRNA, protein_coding	SCYL3	4.07	4.26	3.51	3.61	5.34	3.48	4.27	5.45	3.31	171.701	0.107076	0.510754	0.609523	0.759516	171.701	-0.0335058	-0.160015	0.872869	0.999983
ENSG00000000460.17_6	9	7	[ENST00000286031.10_4, ENST00000359326.9_5, ENST00000413811.3_5, ENST00000459772.5_2, ENST00000466580.6_2, ENST00000472795.5_5, ENST00000481744.5_2, ENST00000496973.5_5, ENST00000498289.5_1]	chr1:169631244-169823221	+	-	32	191977	5970	1009	4961	0.830988	ENST00000286031.10_4, ENST00000359326.9_5, ENST00000413811.3_5, ENST00000459772.5_2, ENST00000466580.6_2, ENST00000472795.5_5, ENST00000481744.5_2, ENST00000496973.5_5, ENST00000498289.5_1	C1orf112	lncRNA, nonsense_mediated_decay, protein_coding	C1orf112	7.93	9.47	9.47	10.29	11.46	10.57	14.1	14.47	11.58	220.198	-0.348086	-2.28946	0.0220529	0.0835086	220.198	-0.280062	-1.87731	0.060475	0.716799
ENSG00000000938.13_3	7	6	[ENST00000374003.7_2, ENST00000374004.5_1, ENST00000374005.8_2, ENST00000399173.5_1, ENST00000457296.5_1, ENST00000468038.1_1, ENST00000475472.5_1]	chr1:27938574-27961696	-	-	15	23122	3382	93	3289	0.972501	ENST00000374003.7_3, ENST00000374004.5_1, ENST00000374005.8_2, ENST00000399173.5_1, ENST00000457296.5_1, ENST00000468038.1_1, ENST00000475472.5_1	FGR	lncRNA, protein_coding	FGR	0	0	0	0	0	0	0.04	0	0
ENSG00000000971.15_2	6	5	[ENST00000359637.2_1, ENST00000367429.8_1, ENST00000466229.5_1, ENST00000470918.1_1, ENST00000496761.1_1, ENST00000630130.2_1]	chr1:196621007-196716634	+	-	21	95627	8145	1176	6969	0.855617	ENST00000359637.2_1, ENST00000367429.8_1, ENST00000466229.5_1, ENST00000470918.1_1, ENST00000496761.1_1, ENST00000630130.2_1	CFH	lncRNA, protein_coding, retained_intron	CFH	0	0	0	0	0	0	0	0	0
ENSG00000001036.13_2	3	2	[ENST00000002165.10_1, ENST00000367585.1_1, ENST00000451668.1_1]	chr6:143815947-143832827	-	-	7	16880	2793	865	1928	0.690297	ENST00000002165.10_1, ENST00000367585.1_1, ENST00000451668.1_1	FUCA2	lncRNA, protein_coding	FUCA2	49.12	71.45	57.32	60.26	57.59	70.94	59.76	68.1	67.69	730.893	0.0836211	0.533586	0.593628	0.748021	730.893	-0.0217052	-0.13894	0.889497	0.999983
ENSG00000001084.12_6	15	15	[ENST00000229416.10_1, ENST00000504353.1_1, ENST00000504525.1_1, ENST00000505197.1_1, ENST00000505294.5_2, ENST00000509541.5_2, ENST00000510837.5_1, ENST00000513939.6_2, ENST00000514004.5_1, ENST00000514373.3_2, ENST00000514933.2_2, ENST00000515580.1_1, ENST00000616923.5_4, ENST00000643939.1_3, ENST00000650454.1_2]	chr6:53362138-53481768	-	-	20	119630	8646	1012	7634	0.882952	ENST00000502390.5_1, ENST00000503985.5_1, ENST00000504353.1_1, ENST00000504525.1_1, ENST00000504928.1_1, ENST00000505197.1_1, ENST00000505294.5_2, ENST00000505995.5_1, ENST00000506206.5_1, ENST00000509541.5_2, ENST00000510837.5_1, ENST00000510846.5_1, ENST00000513939.6_2, ENST00000514004.5_1, ENST00000514373.3_2, ENST00000514933.2_2, ENST00000515580.1_1, ENST00000616923.5_5, ENST00000643939.1_4, …	AL033397.1, GCLC	lncRNA, nonsense_mediated_decay, protein_coding, retained_intron	GCLC	20.65	20.33	29.09	26.91	35.59	27.96	31.27	42.2	24.01	402.911	-0.232251	-1.25591	0.209148	0.388171	402.911	-0.0627506	-0.343507	0.731217	0.999983
ENSG00000001167.14_3	2	2	[ENST00000341376.10_2, ENST00000353205.5_2]	chr6:41040683-41067715	+	-	10	27032	3811	0	3811	1	ENST00000341376.10_2, ENST00000353205.5_2	NFYA	protein_coding	NFYA	8.46	9.06	8.08	10.1	9.05	10.36	9.8	11.07	9.55	272.314	-0.014416	-0.0935292	0.925483	0.958254	272.314	-0.00814653	-0.053553	0.957291	0.999983
ENSG00000001460.18_4	12	12	[ENST00000003583.12_1, ENST00000337248.9_2, ENST00000374409.5_1, ENST00000435187.1_2, ENST00000438866.1_2, ENST00000468303.5_1, ENST00000475760.1_1, ENST00000483261.1_1, ENST00000483528.1_1, ENST00000492753.1_1, ENST00000497384.1_1, ENST00000498488.5_1]	chr1:24683488-24743424	-	-	12	59936	8511	2088	6423	0.75467	ENST00000003583.12_1, ENST00000337248.9_2, ENST00000374409.5_1, ENST00000435187.1_2, ENST00000438866.1_2, ENST00000468303.5_1, ENST00000475760.1_1, ENST00000483261.1_1, ENST00000483528.1_1, ENST00000492753.1_1, ENST00000497384.1_1, ENST00000498488.5_1	STPG1	lncRNA, protein_coding	STPG1	3.1	3.4	2.75	5.01	3.65	4.54	2.77	3.98	3.42	92.6665	0.106051	0.42119	0.673616	0.805518	92.6665	0.420175	1.68488	0.0920112	0.811652
ENSG00000001461.17_3	7	7	[ENST00000003912.7_2, ENST00000339255.2_2, ENST00000358028.8_2, ENST00000374399.9_2, ENST00000432012.1_1, ENST00000475663.2_1, ENST00000488155.1_1]	chr1:24742291-24799466	+	-	16	57175	9396	2897	6499	0.691677	ENST00000003912.7_2, ENST00000339255.2_2, ENST00000358028.8_2, ENST00000374399.9_2, ENST00000432012.1_1, ENST00000475663.2_1, ENST00000488155.1_1	NIPAL3	lncRNA, protein_coding	NIPAL3	2.55	2.18	2.46	3.63	3.72	3.58	3.44	3.87	4.36	112.531	-0.459854	-2.05595	0.0397871	0.127645	112.531	-0.0554641	-0.253224	0.800095	0.999983
ENSG00000001497.16_2	5	4	[ENST00000374804.9_1, ENST00000374807.9_1, ENST00000374811.7_1, ENST00000469091.1_1, ENST00000484069.1_1]	chrX:64732461-64754655	-	-	14	22194	5589	2025	3564	0.637681	ENST00000374804.9_1, ENST00000374807.9_1, ENST00000374811.7_1, ENST00000469091.1_1, ENST00000484069.1_1	LAS1L	nonsense_mediated_decay, protein_coding	LAS1L	8.39	8.28	10.15	11.48	13.06	10	10.02	11.67	8.4	363.704	0.0740698	0.481988	0.629815	0.773035	363.704	0.236965	1.55193	0.120679	0.865839
ENSG00000001561.7_3	1	1	[ENST00000321037.5_2]	chr6:46097725-46114425	+	-	4	16700	4644	0	4644	1	ENST00000321037.5_2	ENPP4	protein_coding	ENPP4	0.43	0.89	0.41	0.99	1.34	1.12	0.71	1.05	0.88	50.4165	-0.395949	-1.14332	0.252907	0.439481	50.4165	0.415175	1.25201	0.210566	0.967828
ENSG00000001617.12_4	9	9	[ENST00000002829.8_3, ENST00000413852.5_2, ENST00000414301.5_1, ENST00000420831.1_3, ENST00000426511.5_3, ENST00000434342.5_2, ENST00000450338.5_3, ENST00000470737.1_1, ENST00000493743.1_1]	chr3:50192477-50226508	+	-	20	34031	4826	206	4620	0.957315	ENST00000002829.8_3, ENST00000413852.5_2, ENST00000414301.5_1, ENST00000420831.1_3, ENST00000426511.5_3, ENST00000434342.5_2, ENST00000450338.5_3, ENST00000470737.1_1, ENST00000493743.1_1	SEMA3F	protein_coding, retained_intron	SEMA3F	19.75	24.41	23.35	27.78	29.62	22.66	23.91	26.78	23	686.776	0.101841	0.760067	0.447215	0.629991	686.776	0.150617	1.12632	0.260031	0.999983
ENSG00000001626.15_5	18	14	[ENST00000003084.10_1, ENST00000426809.5_1, ENST00000429014.1_1, ENST00000446805.1_3, ENST00000468795.1_1, ENST00000472848.1_1, ENST00000546407.1_1, ENST00000600166.1_1, ENST00000608965.5_2, ENST00000610149.1_2, ENST00000621535.1_1, ENST00000647639.1_1, ENST00000647720.1_1, ENST00000647978.1_1, ENST00000648260.1_1, ENST00000649406.1_1, ENST00000649781.1_1, ENST00000649850.1_1]	chr7:117105837-117356025	+	-	39	250188	9343	462	8881	0.950551	ENST00000003084.10_1, ENST00000426809.5_2, ENST00000429014.1_1, ENST00000446805.1_4, ENST00000468795.1_1, ENST00000472848.1_1, ENST00000546407.1_1, ENST00000600166.1_2, ENST00000608965.5_2, ENST00000610149.1_2, ENST00000621535.1_1, ENST00000647639.1_1, ENST00000647720.1_1, ENST00000647978.1_1, ENST00000648260.1_1, ENST00000649406.1_1, ENST00000649781.1_1, ENST00000649850.1_1	CFTR	lncRNA, nonsense_mediated_decay, protein_coding, retained_intron	CFTR	0	0	0	0	0.25	0	0	0	0
ENSG00000001629.10_4	7	7	[ENST00000265742.8_2, ENST00000413588.1_3, ENST00000422095.1_3, ENST00000439883.1_3, ENST00000442183.1_3, ENST00000465883.1_1, ENST00000486698.1_1]	chr7:91875287-92030697	+	-	24	155410	7389	396	6993	0.946407	ENST00000265742.8_2, ENST00000413588.1_3, ENST00000422095.1_3, ENST00000439883.1_3, ENST00000442183.1_3, ENST00000465883.1_1, ENST00000486698.1_1	ANKIB1	lncRNA, nonsense_mediated_decay, protein_coding, retained_intron	ANKIB1	19.28	22.71	20.12	23.29	25.67	26.73	28.48	32.25	26.86	1038.97	-0.263502	-2.6153	0.00891495	0.0434464	1038.97	-0.177019	-1.77193	0.0764065	0.766272
ENSG00000001630.17_6	4	4	[ENST00000003100.13_3, ENST00000422867.1_2, ENST00000450723.5_2, ENST00000482924.1_1]	chr7:91741466-91764117	-	-	11	22651	3529	396	3133	0.887787	ENST00000003100.13_3, ENST00000422722.1_2, ENST00000422867.1_3, ENST00000435873.1_2, ENST00000450723.5_2, ENST00000482924.1_1, ENST00000650585.1_1	AC000120.2, AC000120.3, CYP51A1	lncRNA, protein_coding, retained_intron	CYP51A1, LRRD1	37.73	39.02	40.4	41.24	55.27	50.04	50.85	67.67	41.65	1348.05	-0.202824	-1.57641	0.114931	0.261837	1348.05	-0.0852066	-0.665262	0.505883	0.999983
ENSG00000001631.15_6	24	18	[ENST00000340022.6_3, ENST00000394503.6_3, ENST00000394505.6_3, ENST00000394507.5_3, ENST00000412043.6_3, ENST00000413688.5_3, ENST00000422347.5_4, ENST00000425073.1_1, ENST00000425919.5_3, ENST00000430102.5_4, ENST00000433016.5_4, ENST00000440209.5_3, ENST00000444960.5_4, ENST00000445516.1_2, ENST00000452773.5_3, ENST00000454017.5_3, ENST00000458177.5_3, ENST00000458493.5_3, ENST00000466166.1_1,…	chr7:91828282-91875480	-	-	18	47198	6204	887	5317	0.857028	ENST00000340022.6_3, ENST00000394503.6_3, ENST00000394505.6_3, ENST00000394507.5_3, ENST00000412043.6_3, ENST00000413688.5_4, ENST00000414227.1_1, ENST00000422347.5_5, ENST00000425073.1_1, ENST00000425919.5_3, ENST00000430102.5_5, ENST00000433016.5_5, ENST00000440209.5_3, ENST00000444960.5_5, ENST00000445516.1_3, ENST00000452773.5_3, ENST00000454017.5_4, ENST00000458177.5_4, ENST00000458493.5_3, …	AC000120.1, AC000120.3, KRIT1	lncRNA, protein_coding, retained_intron	KRIT1	14.52	14.46	18.5	25.43	36.36	24.2	29.96	33.68	20.06	477.423	-0.572794	-3.09745	0.00195194	0.0143005	477.423	0.0778876	0.427232	0.66921	0.999983
ENSG00000002016.17_3	19	17	[ENST00000228345.9_1, ENST00000358495.7_1, ENST00000397230.6_1, ENST00000430095.6_1, ENST00000461568.5_1, ENST00000463750.5_1, ENST00000468231.5_1, ENST00000481052.5_1, ENST00000488642.6_1, ENST00000535376.5_1, ENST00000536177.5_1, ENST00000541619.1_1, ENST00000542297.1_1, ENST00000542584.5_1, ENST00000542785.5_2, ENST00000543912.5_1, ENST00000544742.5_1, ENST00000545564.5_1, ENST00000545967.1_1]	chr12:1021242-1099219	-	-	12	77977	4190	518	3672	0.876372	ENST00000228345.9_1, ENST00000358495.7_1, ENST00000397230.6_1, ENST00000430095.6_1, ENST00000461568.5_1, ENST00000463750.5_1, ENST00000468231.5_1, ENST00000481052.5_1, ENST00000488642.6_1, ENST00000503602.6_1, ENST00000535376.5_1, ENST00000536177.5_1, ENST00000539259.1_1, ENST00000541619.1_1, ENST00000542297.1_1, ENST00000542584.5_1, ENST00000542785.5_3, ENST00000543290.1_1, ENST00000543912.5_1, …	AC004803.1, RAD52	lncRNA, nonsense_mediated_decay, protein_coding, retained_intron	RAD52	2.28	3.36	2.03	3.1	4.84	3.9	3.75	4.52	4.11	49.6101	-0.483681	-1.54076	0.123375	0.274209	49.6101	-0.0334724	-0.110778	0.911793	0.999983
ENSG00000002079.14_3	5	5	[ENST00000425880.1_1, ENST00000429079.1_1, ENST00000439784.7_3, ENST00000452010.2_2, ENST00000453194.2_2]	chr7:98836451-98908753	+	-	43	72302	6307	0	6307	1	ENST00000425880.1_1, ENST00000429079.1_1, ENST00000439784.7_3, ENST00000452010.2_2, ENST00000453194.2_2	MYH16	lncRNA, retained_intron, transcribed_unitary_pseudogene		0.02	0.01	0	0	0.01	0	0	0	0	0.214808	1.06333	0.264787	0.791174	NA	0.214808	0.161864	0.0398689	0.968198	NA
ENSG00000002330.13_5	7	7	[ENST00000309032.7_1, ENST00000394531.3_1, ENST00000394532.7_1, ENST00000492141.1_4, ENST00000493798.1_3, ENST00000544271.1_1, ENST00000544785.1_1]	chr11:64037301-64052176	-	-	5	14875	1708	68	1640	0.960187	ENST00000309032.7_1, ENST00000394531.3_1, ENST00000394532.7_1, ENST00000492141.1_4, ENST00000493798.1_4, ENST00000544271.1_1, ENST00000544785.1_1	BAD	protein_coding, retained_intron	BAD	45.37	30.61	39.51	18.8	31.11	29.63	25.28	35.25	27.48	249.225	0.639576	2.92015	0.00349868	0.0221316	249.225	-0.119087	-0.53786	0.590674	0.999983
ENSG00000002549.12_3	11	11	[ENST00000226299.8_1, ENST00000503467.1_1, ENST00000504614.5_1, ENST00000507960.1_1, ENST00000508014.5_1, ENST00000508497.5_1, ENST00000509583.1_1, ENST00000512397.1_1, ENST00000513105.1_1, ENST00000606142.5_2, ENST00000618908.4_1]	chr4:17578814-17609595	+	-	15	30781	3785	391	3394	0.896697	ENST00000226299.8_1, ENST00000503467.1_1, ENST00000504614.5_1, ENST00000507960.1_1, ENST00000508014.5_1, ENST00000508497.5_1, ENST00000509583.1_1, ENST00000512397.1_1, ENST00000513105.1_1, ENST00000606142.5_2, ENST00000618908.4_1	LAP3	lncRNA, nonsense_mediated_decay, protein_coding, retained_intron	LAP3	8.42	10.59	7.34	10.25	10.67	12.39	12.96	11.38	9.72	137.979	-0.137477	-0.650904	0.515109	0.685466	137.979	0.00524233	0.0254703	0.97968	0.999983
ENSG00000002586.20_5	15	13	[ENST00000381177.7_3, ENST00000381180.9_3, ENST00000381184.6_2, ENST00000381187.8_1, ENST00000381192.10_3, ENST00000449611.6_2, ENST00000482293.6_1, ENST00000482405.7_2, ENST00000497752.7_2, ENST00000611428.5_1, ENST00000623253.4_2, ENST00000624481.4_2, ENST00000645950.1_1, ENST00000646103.1_1, ENST00000647297.1_1]	chrX:2609227-2659350	+	-	15	50123	4858	788	4070	0.837793	ENST00000381177.7_4, ENST00000381180.9_3, ENST00000381184.6_3, ENST00000381187.8_1, ENST00000381192.10_3, ENST00000449611.6_2, ENST00000482293.6_1, ENST00000482405.7_2, ENST00000497752.7_2, ENST00000611428.5_1, ENST00000623253.4_2, ENST00000624481.4_2, ENST00000645950.1_1, ENST00000646103.1_1, ENST00000647297.1_1	CD99	lncRNA, nonsense_mediated_decay, protein_coding, retained_intron	CD99	70.37	72.51	84.91	56.1	55.09	62.01	85.79	83.68	78.37	449.488	0.10868	0.786714	0.431449	0.617368	449.488	-0.485554	-3.46477	0.000530686	0.057351
ENSG00000002586.20_5_PAR_Y	15	13	[ENST00000381177.7_3_PAR_Y, ENST00000381180.9_3_PAR_Y, ENST00000381184.6_2_PAR_Y, ENST00000381187.8_1_PAR_Y, ENST00000381192.10_3_PAR_Y, ENST00000449611.6_2_PAR_Y, ENST00000482293.6_1_PAR_Y, ENST00000482405.7_2_PAR_Y, ENST00000497752.7_2_PAR_Y, ENST00000611428.5_1_PAR_Y, ENST00000623253.4_2_PAR_Y, ENST00000624481.4_2_PAR_Y, ENST00000645950.1_1_PAR_Y, ENST00000646103.1_1_PAR_Y, ENST00000647297.1_1…	chrY:2559227-2609350	+	-	15	50123	4858	788	4070	0.837793	ENST00000381177.7_4_PAR_Y, ENST00000381180.9_3_PAR_Y, ENST00000381184.6_3_PAR_Y, ENST00000381187.8_1_PAR_Y, ENST00000381192.10_3_PAR_Y, ENST00000449611.6_2_PAR_Y, ENST00000482293.6_1_PAR_Y, ENST00000482405.7_2_PAR_Y, ENST00000497752.7_2_PAR_Y, ENST00000611428.5_1_PAR_Y, ENST00000623253.4_2_PAR_Y, ENST00000624481.4_2_PAR_Y, ENST00000645950.1_1_PAR_Y, ENST00000646103.1_1_PAR_Y, ENST00000647297.1_1_…	CD99	lncRNA, nonsense_mediated_decay, protein_coding, retained_intron		70.37	72.51	84.91	56.1	55.09	62.01	85.79	83.68	78.37	449.488	0.10868	0.786714	0.431449	0.617368	449.488	-0.485554	-3.46477	0.000530686	0.057351
ENSG00000002587.10_5	3	3	[ENST00000002596.6_2, ENST00000510712.1_1, ENST00000514690.5_1]	chr4:11394773-11431188	-	-	4	36415	7435	1184	6251	0.840753	ENST00000002596.6_2, ENST00000510712.1_1, ENST00000514690.5_1	HS3ST1	protein_coding	HS3ST1	0.01	0	0.05	0	0.01	0	0.02	0.01	0	0.692985	0.920784	0.38867	0.69752	NA	0.692985	-0.920956	-0.365892	0.714446	NA
ENSG00000002726.20_5	7	7	[ENST00000360937.8_4, ENST00000416793.6_4, ENST00000460213.1_4, ENST00000467291.5_4, ENST00000480582.1_1, ENST00000483043.1_4, ENST00000493429.5_4]	chr7:150521714-150558592	+	-	11	36878	3824	289	3535	0.924425	ENST00000360937.8_4, ENST00000416793.6_4, ENST00000460213.1_5, ENST00000467291.5_4, ENST00000480582.1_1, ENST00000483043.1_5, ENST00000493429.5_4	AOC1	lncRNA, protein_coding	ABP1	0	0	0.09	0	0	0	0.04	0.03	0	0.405369	-0.0923276	-0.0254227	0.979718	NA	0.405369	-1.66167	-0.457552	0.647274	NA
ENSG00000002745.13_4	2	2	[ENST00000222462.3_3, ENST00000361301.6_2]	chr7:120965420-120981158	+	-	5	15738	3264	0	3264	1	ENST00000222462.3_3, ENST00000361301.6_2	WNT16	protein_coding	WNT16	0	0	0	0	0	0	0	0	0
ENSG00000002746.15_4	11	11	[ENST00000395891.7_2, ENST00000429529.1_1, ENST00000453890.5_1, ENST00000461842.1_1, ENST00000464944.1_1, ENST00000471043.1_1, ENST00000471527.1_1, ENST00000481031.5_1, ENST00000490954.2_1, ENST00000492310.5_1, ENST00000493057.1_1]	chr7:43152227-43605600	+	-	37	453373	13935	797	13138	0.942806	ENST00000395891.7_2, ENST00000429529.1_1, ENST00000453890.5_1, ENST00000461842.1_1, ENST00000464944.1_1, ENST00000471043.1_1, ENST00000471527.1_1, ENST00000481031.5_1, ENST00000490954.2_1, ENST00000492310.5_1, ENST00000493057.1_1	HECW1	lncRNA, protein_coding	HECW1	0.26	0.23	0.49	0.58	0.61	0.31	0.77	0.39	0.62	4.10828	-0.615691	-0.61184	0.540644	NA	4.10828	-0.236422	-0.254697	0.798957	0.999983
ENSG00000002822.15_5	23	22	[ENST00000265854.11_1, ENST00000399654.6_1, ENST00000402746.5_1, ENST00000406869.5_1, ENST00000421113.5_2, ENST00000429625.5_3, ENST00000429779.1_2, ENST00000437877.1_2, ENST00000438959.5_4, ENST00000444373.6_2, ENST00000445959.5_3, ENST00000450235.5_3, ENST00000455998.5_3, ENST00000459731.1_1, ENST00000464742.5_1, ENST00000468372.5_1, ENST00000469871.1_1, ENST00000477172.1_1, ENST00000481633.1_1…	chr7:1855428-2272878	-	-	37	417450	7230	1011	6219	0.860166	ENST00000265854.11_1, ENST00000399654.6_1, ENST00000402746.5_1, ENST00000406869.5_1, ENST00000421113.5_2, ENST00000429625.5_3, ENST00000429779.1_2, ENST00000437877.1_2, ENST00000438959.5_4, ENST00000444373.6_2, ENST00000445959.5_3, ENST00000450235.5_3, ENST00000455998.5_3, ENST00000459731.1_1, ENST00000464742.5_1, ENST00000468372.5_1, ENST00000469871.1_1, ENST00000477172.1_1, ENST00000481633.1_1,…	AC069288.1, MAD1L1	lncRNA, nonsense_mediated_decay, protein_coding, retained_intron	MAD1L1	1.37	3.94	2.5	2.05	2.63	1.18	3.17	3.31	4.01	29.5265	-0.234141	-0.505188	0.613427	0.761731	29.5265	-0.82749	-1.83003	0.067246	0.739746
ENSG00000002834.18_4	9	8	[ENST00000318008.11_2, ENST00000419929.1_1, ENST00000433206.6_1, ENST00000435347.7_1, ENST00000443937.7_1, ENST00000579123.1_2, ENST00000581485.1_1, ENST00000584106.1_1, ENST00000585841.5_1]	chr17:37026111-37078023	+	-	9	51912	7061	749	6312	0.893924	ENST00000318008.11_2, ENST00000419929.1_1, ENST00000433206.6_1, ENST00000435347.7_1, ENST00000443937.7_1, ENST00000579123.1_2, ENST00000581485.1_1, ENST00000584106.1_1, ENST00000585841.5_1	LASP1	nonsense_mediated_decay, protein_coding, retained_intron	LASP1	107.81	91	84.44	78.39	73.61	71.96	91.48	86.19	73.14	2588.58	0.415901	2.88011	0.00397542	0.0243139	2588.58	-0.126938	-0.878002	0.379943	0.999983
ENSG00000002919.14_2	13	11	[ENST00000359238.6_2, ENST00000393405.6_2, ENST00000452859.6_1, ENST00000577310.1_1, ENST00000578861.5_1, ENST00000580219.5_2, ENST00000580875.1_1, ENST00000581298.5_1, ENST00000581705.5_1, ENST00000582104.5_2, ENST00000582481.1_1, ENST00000583320.5_1, ENST00000584335.5_2]	chr17:46180718-46200436	+	-	11	19718	3606	243	3363	0.932612	ENST00000359238.6_2, ENST00000393405.6_2, ENST00000452859.6_1, ENST00000577310.1_1, ENST00000578861.5_1, ENST00000580219.5_2, ENST00000580875.1_1, ENST00000581298.5_1, ENST00000581705.5_1, ENST00000582104.5_2, ENST00000582481.1_1, ENST00000583320.5_1, ENST00000584335.5_2	SNX11	lncRNA, nonsense_mediated_decay, protein_coding, retained_intron	SNX11	8.87	10.43	9.25	10.96	12.91	9.59	8.11	10.7	6.68	146.076	0.399961	2.01885	0.0435033	0.135428	146.076	0.42723	2.17989	0.0292656	0.572643
ENSG00000002933.9_6	11	11	[ENST00000004103.8_2, ENST00000461345.5_1, ENST00000462826.1_1, ENST00000468689.2_3, ENST00000474166.1_1, ENST00000475007.5_1, ENST00000475536.5_4, ENST00000475710.1_1, ENST00000481305.1_1, ENST00000484928.5_1, ENST00000494349.5_1]	chr7:150497490-150502206	+	-	4	4716	3477	0	3477	1	ENST00000004103.8_2, ENST00000461345.5_1, ENST00000462826.1_1, ENST00000468689.2_3, ENST00000474166.1_1, ENST00000475007.5_1, ENST00000475536.5_5, ENST00000475710.1_1, ENST00000481305.1_1, ENST00000484928.5_1, ENST00000494349.5_1	TMEM176A	protein_coding, retained_intron	TMEM176A	0	0	0	0	0	0	0	0	0
ENSG00000003056.3	12	12	[ENST00000000412.3, ENST00000537621.1, ENST00000539143.1, ENST00000540837.1, ENST00000541507.1, ENST00000543159.1, ENST00000543258.1, ENST00000543704.1, ENST00000543834.1, ENST00000543845.1, ENST00000544193.1, ENST00000544245.1]	chr12:9092958-9102551	-	-	7	9593	3777	104	3673	0.972465	ENST00000000412.3, ENST00000537621.1, ENST00000539143.1, ENST00000540837.1, ENST00000541507.1, ENST00000543159.1, ENST00000543258.1, ENST00000543704.1, ENST00000543834.1, ENST00000543845.1, ENST00000544193.1, ENST00000544245.1	M6PR	nonsense_mediated_decay, protein_coding, retained_intron	M6PR	22.11	20.36	20.49	18.9	31.16	29.98	33.06	34.28	23.47	387.509	-0.285688	-1.56631	0.117276	0.26522	387.509	-0.152318	-0.845319	0.397933	0.999983
ENSG00000003096.14_4	9	8	[ENST00000262820.7_2, ENST00000371876.5_1, ENST00000371878.5_1, ENST00000371882.5_1, ENST00000453826.1_2, ENST00000469946.5_3, ENST00000540167.5_2, ENST00000541812.5_2, ENST00000545703.5_2]	chrX:117031775-117251303	-	-	12	219528	6983	630	6353	0.909781	ENST00000262820.7_2, ENST00000371876.5_1, ENST00000371878.5_1, ENST00000371882.5_1, ENST00000436163.2, ENST00000453826.1_2, ENST00000469946.5_3, ENST00000540167.5_2, ENST00000541812.5_2, ENST00000545703.5_2	KLHL13, RP1-169K13.3	processed_pseudogene, protein_coding	KLHL13	0.82	0.69	0.41	0.43	0.58	0.71	0.71	0.91	0.65	20.2794	0.00946374	0.0205178	0.98363	0.990463	20.2794	-0.364017	-0.780389	0.435162	0.999983
ENSG00000003137.8_4	5	4	[ENST00000001146.6_1, ENST00000412253.1_1, ENST00000461519.1_2, ENST00000474509.1_2, ENST00000546307.5_1]	chr2:72356366-72375167	-	-	7	18801	5015	162	4853	0.967697	ENST00000001146.6_1, ENST00000412253.1_1, ENST00000461519.1_3, ENST00000474509.1_3, ENST00000546307.5_1	CYP26B1	protein_coding	CYP26B1	1.01	1.39	1.16	1.8	1.48	1.6	1.03	1.87	1.76	71.7711	-0.159205	-0.543227	0.586973	0.742744	71.7711	0.10737	0.373178	0.709016	0.999983
ENSG00000003147.19_5	19	17	[ENST00000265577.11_2, ENST00000317367.9_1, ENST00000339809.10_1, ENST00000396675.7_1, ENST00000401396.5_2, ENST00000402384.8_2, ENST00000406470.6_1, ENST00000407906.5_1, ENST00000422063.6_3, ENST00000430867.5_1, ENST00000446305.1_1, ENST00000447326.5_1, ENST00000455539.5_1, ENST00000457755.5_1, ENST00000470696.1_1, ENST00000476942.1_1, ENST00000486677.1_1, ENST00000490041.1_1, ENST00000650486.1_…	chr7:8152813-8302317	-	-	21	149504	4883	376	4507	0.922998	ENST00000265577.11_2, ENST00000317367.9_1, ENST00000339809.10_1, ENST00000396675.7_1, ENST00000401396.5_2, ENST00000402384.8_2, ENST00000406470.6_1, ENST00000407906.5_1, ENST00000422063.6_3, ENST00000430867.5_1, ENST00000446305.1_1, ENST00000447326.5_1, ENST00000455539.5_1, ENST00000457755.5_1, ENST00000470696.1_1, ENST00000476942.1_1, ENST00000486677.1_1, ENST00000490041.1_1, ENST00000650486.1_1	ICA1	lncRNA, nonsense_mediated_decay, protein_coding, retained_intron	ICA1	17.77	19.33	24.79	18.99	25.39	24.88	29.23	44.6	18.41	336.347	-0.308505	-1.37855	0.168033	0.33425	336.347	-0.34908	-1.56796	0.11689	0.863404
ENSG00000003249.13_2	7	7	[ENST00000002501.10_1, ENST00000304733.7_1, ENST00000392973.7_1, ENST00000568330.2_1, ENST00000568662.1_1, ENST00000568838.1_1, ENST00000623401.1_1]	chr16:90071272-90086536	-	-	6	15264	4791	271	4520	0.943436	ENST00000002501.10_1, ENST00000304733.7_1, ENST00000392973.7_1, ENST00000568330.2_1, ENST00000568662.1_1, ENST00000568838.1_1, ENST00000623401.1_1	DBNDD1	TEC, nonsense_mediated_decay, protein_coding, retained_intron	DBNDD1	82.81	84.5	85.02	70.18	62.07	73.4	73.98	69.28	84.66	1957.91	0.36324	2.33004	0.0198043	0.0774971	1957.91	-0.128667	-0.82411	0.409877	0.999983
ENSG00000003393.15_5	12	9	[ENST00000264276.11_2, ENST00000409632.6_1, ENST00000410052.1_3, ENST00000439495.5_3, ENST00000462747.1_1, ENST00000467448.5_1, ENST00000482789.5_1, ENST00000482891.5_1, ENST00000483703.1_1, ENST00000489440.5_1, ENST00000494017.5_1, ENST00000496244.5_1]	chr2:202564989-202645679	-	-	40	80690	10438	1487	8951	0.85754	ENST00000264276.11_2, ENST00000409632.6_1, ENST00000410052.1_3, ENST00000439495.5_3, ENST00000462747.1_1, ENST00000467448.5_1, ENST00000482789.5_1, ENST00000482891.5_1, ENST00000483703.1_1, ENST00000489440.5_1, ENST00000494017.5_1, ENST00000496244.5_1	ALS2	lncRNA, nonsense_mediated_decay, protein_coding, retained_intron	ALS2	1.76	2.86	2.39	3.19	4.95	2.52	3.43	3.83	3.1	143.638	-0.342341	-1.37346	0.16961	0.336189	143.638	0.0579093	0.235024	0.81419	0.999983
ENSG00000003400.14_4	13	13	[ENST00000272879.9_4, ENST00000286186.10_1, ENST00000313728.11_4, ENST00000346817.9_1, ENST00000360132.7_1, ENST00000374650.7_1, ENST00000438843.5_1, ENST00000448480.1_3, ENST00000460140.5_1, ENST00000471191.1_1, ENST00000484926.1_1, ENST00000485408.1_1, ENST00000492363.5_1]	chr2:202047603-202094129	+	-	12	46526	7598	2239	5359	0.705317	ENST00000272879.9_4, ENST00000286186.10_1, ENST00000313728.11_4, ENST00000346817.9_1, ENST00000360132.7_1, ENST00000374650.7_1, ENST00000438843.5_1, ENST00000448480.1_3, ENST00000460140.5_1, ENST00000471191.1_1, ENST00000484926.1_1, ENST00000485408.1_1, ENST00000492363.5_1	CASP10	lncRNA, nonsense_mediated_decay, protein_coding, retained_intron	CASP10	0.13	0.03	0.35	0.31	0.04	0.03	0.04	0.08	0.06	6.88969	1.6118	1.49349	0.135309	NA	6.88969	0.770186	0.688615	0.491066	0.999983
ENSG00000003402.20_4	25	25	[ENST00000309955.8_2, ENST00000340870.6_1, ENST00000341222.10_1, ENST00000341582.10_1, ENST00000342795.9_1, ENST00000395148.6_1, ENST00000417748.1_2, ENST00000423241.6_1, ENST00000425030.1_1, ENST00000433445.1_1, ENST00000439154.6_1, ENST00000440180.5_1, ENST00000441224.5_1, ENST00000443227.5_1, ENST00000457277.5_2, ENST00000460961.1_1, ENST00000461422.1_1, ENST00000461820.5_1, ENST00000462763.5_…	chr2:201980876-202041410	+	-	20	60534	22479	12567	9912	0.440945	ENST00000309955.8_2, ENST00000340870.6_1, ENST00000341222.10_1, ENST00000341582.10_1, ENST00000342795.9_1, ENST00000395148.6_1, ENST00000417748.1_2, ENST00000423241.6_1, ENST00000425030.1_1, ENST00000433445.1_1, ENST00000434645.1_2, ENST00000439154.6_1, ENST00000440180.5_1, ENST00000441224.5_1, ENST00000443227.5_1, ENST00000457277.5_2, ENST00000460961.1_1, ENST00000461422.1_1, ENST00000461820.5_1…	AC007283.1, CFLAR	lncRNA, nonsense_mediated_decay, protein_coding, retained_intron	CFLAR	3.54	6.42	4.32	5.2	6.15	5.41	7.27	7.94	3.97	223.62	-0.192482	-0.830161	0.406448	0.594567	223.62	-0.143079	-0.618238	0.536419	0.999983
ENSG00000003436.16_5	12	11	[ENST00000233156.9_3, ENST00000339091.8_1, ENST00000392365.5_2, ENST00000409676.5_1, ENST00000417013.5_1, ENST00000420747.1_3, ENST00000421427.5_1, ENST00000435414.5_1, ENST00000437725.5_1, ENST00000453013.5_1, ENST00000481132.5_1, ENST00000481389.1_1]	chr2:188328956-188430487	-	-	13	101531	11714	7102	4612	0.393717	ENST00000233156.9_3, ENST00000339091.8_1, ENST00000392365.5_2, ENST00000409676.5_1, ENST00000417013.5_1, ENST00000420747.1_3, ENST00000421427.5_1, ENST00000435414.5_1, ENST00000437725.5_1, ENST00000453013.5_1, ENST00000481132.5_1, ENST00000481389.1_1	TFPI	protein_coding, retained_intron	TFPI	11.16	13.41	12.78	9.39	11.41	9.43	10.84	11.1	6.55	219.718	0.636929	3.55003	0.00038519	0.00413136	219.718	0.132879	0.732185	0.464056	0.999983
ENSG00000003509.16_3	13	12	[ENST00000002125.9_2, ENST00000336237.10_1, ENST00000416653.5_2, ENST00000419278.2_1, ENST00000431821.5_2, ENST00000432075.1_2, ENST00000439218.5_1, ENST00000441905.1_2, ENST00000455230.5_1, ENST00000469831.1_1, ENST00000474154.5_1, ENST00000474257.5_1, ENST00000483999.5_1]	chr2:37458773-37480546	+	-	12	21773	3651	628	3023	0.827992	ENST00000002125.9_2, ENST00000336237.10_1, ENST00000416653.5_3, ENST00000419278.2_1, ENST00000431821.5_3, ENST00000432075.1_3, ENST00000439218.5_1, ENST00000441905.1_3, ENST00000455230.5_1, ENST00000469831.1_1, ENST00000474154.5_1, ENST00000474257.5_1, ENST00000483999.5_1	NDUFAF7	lncRNA, nonsense_mediated_decay, protein_coding, retained_intron	NDUFAF7	5.68	6.82	7.35	6.56	11.95	8.36	8.31	12.25	9.15	101.538	-0.344978	-1.38633	0.165647	0.330686	101.538	-0.111768	-0.456696	0.64789	0.999983
ENSG00000003756.16_6	26	24	[ENST00000347869.7_1, ENST00000395174.6_1, ENST00000404526.6_3, ENST00000417905.1_3, ENST00000433556.6_1, ENST00000437500.5_3, ENST00000438369.5_1, ENST00000441305.5_4, ENST00000441812.6_1, ENST00000461242.1_1, ENST00000462025.1_1, ENST00000464087.6_1, ENST00000464988.1_1, ENST00000469838.5_1, ENST00000471995.5_1, ENST00000474470.1_1, ENST00000474818.5_1, ENST00000475128.5_1, ENST00000475590.5_1,…	chr3:50126340-50156454	+	-	25	30114	10368	1280	9088	0.876543	ENST00000347869.7_1, ENST00000395174.6_1, ENST00000404526.6_3, ENST00000417905.1_3, ENST00000433556.6_1, ENST00000434592.5_1, ENST00000437500.5_3, ENST00000438369.5_1, ENST00000441305.5_4, ENST00000441812.6_1, ENST00000461242.1_1, ENST00000462025.1_1, ENST00000464087.6_1, ENST00000464988.1_1, ENST00000469838.5_1, ENST00000471995.5_1, ENST00000474470.1_1, ENST00000474818.5_1, ENST00000475128.5_1, …	RBM5, RBM6	lncRNA, nonsense_mediated_decay, protein_coding, retained_intron	RBM5, RBM6	21.37	22.82	19.24	23.06	33.6	26.03	26.75	33.83	19.66	468.081	-0.0889048	-0.534103	0.59327	0.747712	468.081	0.0838909	0.506289	0.612654	0.999983
ENSG00000003987.14_3	9	9	[ENST00000180173.10_2, ENST00000517317.5_1, ENST00000518272.5_1, ENST00000519122.5_1, ENST00000519590.5_1, ENST00000519763.1_1, ENST00000521177.1_1, ENST00000521857.5_1, ENST00000523571.1_1]	chr8:17154302-17271037	-	-	20	116735	6928	268	6660	0.961316	ENST00000180173.10_2, ENST00000517317.5_1, ENST00000518272.5_1, ENST00000519122.5_1, ENST00000519590.5_1, ENST00000519763.1_1, ENST00000521177.1_1, ENST00000521857.5_1, ENST00000523571.1_1	MTMR7	lncRNA, nonsense_mediated_decay, protein_coding, retained_intron	MTMR7	1.14	1	0.61	1.27	2.38	1.19	0.7	0.92	2.73	48.5012	-0.433695	-0.831741	0.405555	0.593655	48.5012	0.160879	0.313464	0.753928	0.999983
ENSG00000003989.17_5	6	5	[ENST00000004531.14_1, ENST00000398090.3_5, ENST00000470360.5_5, ENST00000494857.5_5, ENST00000522656.5_5, ENST00000640220.1_2]	chr8:17354596-17428082	+	-	15	73486	7905	309	7596	0.960911	ENST00000004531.14_1, ENST00000398090.3_5, ENST00000470360.5_5, ENST00000494857.5_5, ENST00000522656.5_5, ENST00000640220.1_3	SLC7A2	protein_coding	SLC7A2	9.12	11.84	9.17	8.94	10.33	9.53	13.87	13.87	10.81	651.574	-0.123744	-0.959227	0.337444	0.529157	651.574	-0.386002	-3.00157	0.00268593	0.161384
ENSG00000004059.11_5	6	6	[ENST00000000233.10_2, ENST00000415666.1_3, ENST00000459680.1_1, ENST00000463733.5_1, ENST00000467281.5_1, ENST00000489673.1_1]	chr7:127228439-127231754	+	-	5	3315	1825	95	1730	0.947945	ENST00000000233.10_2, ENST00000415666.1_3, ENST00000459680.1_1, ENST00000463733.5_1, ENST00000467281.5_1, ENST00000478328.1_1, ENST00000489673.1_1	ARF5, FSCN3	lncRNA, protein_coding, retained_intron	FSCN3, ARF5	161.48	221.25	207.51	171.87	173.75	204.9	204.24	221.86	212.99	1567.51	0.105998	0.809437	0.418264	0.605322	1567.51	-0.186827	-1.42433	0.154352	0.915382
ENSG00000004139.14_4	8	8	[ENST00000379061.8_1, ENST00000577870.2_1, ENST00000578128.5_1, ENST00000579593.1_1, ENST00000580711.1_1, ENST00000582323.1_1, ENST00000585453.5_1, ENST00000585482.6_3]	chr17:26691377-26731067	+	-	17	39690	11084	2313	8771	0.791321	ENST00000379061.8_1, ENST00000577870.2_1, ENST00000578128.5_1, ENST00000579593.1_1, ENST00000580711.1_1, ENST00000582323.1_1, ENST00000583956.1, ENST00000585453.5_1, ENST00000585482.6_3, ENST00000591482.1_1	AC002094.1, CTD-2350C19.1, SARM1	antisense, lncRNA, nonsense_mediated_decay, protein_coding, retained_intron	TMEM199, SARM1	2.98	3.01	3.27	2.71	2.46	2.54	2.27	2.74	2.03	109.135	0.63691	3.10703	0.00188976	0.0139297	109.135	0.171405	0.827046	0.408211	0.999983
ENSG00000004142.12_3	2	2	[ENST00000540200.6_2, ENST00000618887.2_1]	chr17:26673658-26684550	-	-	13	10892	2664	0	2664	1	ENST00000540200.6_2, ENST00000618887.2_1	POLDIP2	protein_coding		33.07	36.44	34.29	36.15	36.49	39.25	39.15	42	29	786.883	0.154918	1.30496	0.191905	0.365437	786.883	0.0645191	0.545271	0.585567	0.999983
ENSG00000004399.12_5	17	17	[ENST00000324093.8_1, ENST00000501038.6_1, ENST00000503166.1_1, ENST00000504524.5_1, ENST00000504689.1_1, ENST00000504767.5_1, ENST00000504979.1_1, ENST00000505237.2_4, ENST00000505505.1_1, ENST00000505665.5_1, ENST00000506979.1_2, ENST00000508630.1_1, ENST00000511018.1_1, ENST00000512744.5_2, ENST00000512807.1_1, ENST00000514990.1_1, ENST00000515191.1_1]	chr3:129274017-129325661	-	-	36	51644	9738	832	8906	0.914562	ENST00000324093.8_1, ENST00000501038.6_1, ENST00000503166.1_1, ENST00000504524.5_1, ENST00000504689.1_1, ENST00000504767.5_1, ENST00000504979.1_1, ENST00000505237.2_4, ENST00000505505.1_1, ENST00000505665.5_1, ENST00000506979.1_2, ENST00000508630.1_1, ENST00000511018.1_1, ENST00000512744.5_2, ENST00000512807.1_1, ENST00000514990.1_1, ENST00000515191.1_1	PLXND1	nonsense_mediated_decay, protein_coding, retained_intron	PLXND1	32.09	33.82	40.59	41.76	45.09	45.25	52.89	46.05	47.87	906.469	-0.239319	-1.74248	0.0814247	0.207746	906.469	-0.127429	-0.933011	0.350814	0.999983
ENSG00000004455.16_2	15	15	[ENST00000354858.10_1, ENST00000373449.6_1, ENST00000466029.1_1, ENST00000467905.5_2, ENST00000469238.1_1, ENST00000480134.5_2, ENST00000482191.1_1, ENST00000487289.1_1, ENST00000491241.1_1, ENST00000548033.5_2, ENST00000548559.1_1, ENST00000550338.5_1, ENST00000551979.1_1, ENST00000626911.1_1, ENST00000629371.2_2]	chr1:33473540-33546597	-	-	13	73057	5727	1163	4564	0.796927	ENST00000354858.10_1, ENST00000373449.6_1, ENST00000466029.1_1, ENST00000467905.5_2, ENST00000469238.1_1, ENST00000480134.5_2, ENST00000482191.1_1, ENST00000487289.1_1, ENST00000491241.1_1, ENST00000548033.5_2, ENST00000548559.1_1, ENST00000550338.5_1, ENST00000551979.1_1, ENST00000626911.1_1, ENST00000629371.2_2	AK2	lncRNA, nonsense_mediated_decay, protein_coding, retained_intron	AK2	111.03	137.37	129.32	163.96	177.79	170.6	182.04	186.37	132.68	1311.68	-0.170578	-1.53055	0.125882	0.277252	1311.68	0.0727385	0.655538	0.512122	0.999983
ENSG00000004468.13_3	5	5	[ENST00000226279.8_2, ENST00000502843.5_1, ENST00000506191.1_1, ENST00000510674.1_2, ENST00000511430.1_1]	chr4:15779897-15854855	+	-	8	74958	6857	2183	4674	0.681639	ENST00000226279.8_2, ENST00000502843.5_1, ENST00000506191.1_1, ENST00000510674.1_3, ENST00000511430.1_1	CD38	nonsense_mediated_decay, protein_coding, retained_intron	CD38	0.09	0.03	0.06	0	0.07	0.01	0.02	0.01	0	1.88792	2.53445	1.5898	0.111881	NA	1.88792	1.23763	0.730841	0.464876	NA
ENSG00000004478.8_3	8	8	[ENST00000001008.6_2, ENST00000538622.1_1, ENST00000539181.1_1, ENST00000540260.1_1, ENST00000543037.1_1, ENST00000543769.1_1, ENST00000544366.1_1, ENST00000630279.1_1]	chr12:2904135-2914589	+	-	12	10454	5163	727	4436	0.85919	ENST00000001008.6_2, ENST00000538622.1_1, ENST00000539181.1_1, ENST00000540260.1_1, ENST00000543037.1_1, ENST00000543769.1_1, ENST00000544366.1_1, ENST00000630279.1_1	FKBP4	lncRNA, nonsense_mediated_decay, protein_coding, retained_intron	FKBP4	37.8	47.91	43.77	48.26	59.22	64.52	56.6	70.72	49.82	2330.61	-0.214087	-1.82614	0.0678292	0.183877	2330.61	-0.00425306	-0.0363831	0.970977	0.999983
ENSG00000004487.16_5	6	6	[ENST00000356634.7_1, ENST00000400181.8_1, ENST00000465864.2_4, ENST00000481879.1_1, ENST00000494920.1_2, ENST00000602503.1_1]	chr1:23345935-23410182	+	-	19	64247	5440	0	5440	1	ENST00000356634.7_1, ENST00000400181.8_1, ENST00000465864.2_4, ENST00000481879.1_1, ENST00000494920.1_2, ENST00000602503.1_1	KDM1A	protein_coding, retained_intron	KDM1A	9.72	11.1	9.74	12.13	14.87	14.55	14.17	15.64	13.34	474.242	-0.266091	-2.17199	0.0298565	0.104341	474.242	-0.0232979	-0.193348	0.846686	0.999983
ENSG00000004534.15_4	20	20	[ENST00000266022.9_3, ENST00000419610.5_1, ENST00000421682.1_1, ENST00000422955.5_2, ENST00000425608.5_1, ENST00000433811.1_3, ENST00000434592.5_1, ENST00000438912.1_3, ENST00000441115.5_1, ENST00000442092.5_2, ENST00000443081.5_1, ENST00000446471.1_1, ENST00000454079.5_1, ENST00000464013.5_1, ENST00000466247.1_1, ENST00000478026.1_1, ENST00000483350.1_1, ENST00000488807.2_1, ENST00000491874.5_1,…	chr3:49977439-50137478	+	-	29	160039	7299	495	6804	0.932183	ENST00000266022.9_3, ENST00000347869.7_1, ENST00000395174.6_1, ENST00000404526.6_3, ENST00000417905.1_3, ENST00000419610.5_1, ENST00000421682.1_1, ENST00000422955.5_2, ENST00000425608.5_1, ENST00000433556.6_1, ENST00000433811.1_3, ENST00000434592.5_1, ENST00000437500.5_3, ENST00000438369.5_1, ENST00000438912.1_3, ENST00000441115.5_1, ENST00000441305.5_4, ENST00000442092.5_2, ENST00000443081.5_1, …	RBM5, RBM6	lncRNA, nonsense_mediated_decay, protein_coding, retained_intron	RBM5, RBM6	6.16	9.22	7.49	8.35	7.85	9.79	8.9	10.42	8.17	272.907	-0.0388903	-0.2289	0.818947	0.898887	272.907	-0.0446433	-0.26384	0.791903	0.999983
ENSG00000004660.14_3	4	3	[ENST00000158166.5_1, ENST00000348335.6_1, ENST00000381769.6_2, ENST00000573483.1_1]	chr17:3763608-3798185	-	-	17	34577	7424	1866	5558	0.748653	ENST00000158166.5_1, ENST00000348335.6_1, ENST00000381769.6_2, ENST00000573483.1_1	CAMKK1	protein_coding, retained_intron	CAMKK1	0.54	0.45	0.75	0.67	0.99	0.7	0.69	0.71	0.78	30.1545	-0.099875	-0.258898	0.795714	0.885174	30.1545	0.135723	0.360066	0.718797	0.999983
ENSG00000004700.16_4	8	7	[ENST00000314748.10_1, ENST00000396093.7_1, ENST00000421138.6_1, ENST00000444129.7_2, ENST00000536240.5_1, ENST00000536964.5_1, ENST00000539672.1_3, ENST00000542432.5_1]	chr12:21621843-21654603	-	-	15	32760	3779	371	3408	0.901826	ENST00000314748.10_2, ENST00000396093.7_2, ENST00000421138.6_1, ENST00000444129.7_2, ENST00000536240.5_2, ENST00000536964.5_2, ENST00000539672.1_3, ENST00000542432.5_2	RECQL	protein_coding	RECQL	1.53	1.65	1.78	2.49	3.51	2.87	3.04	4.8	2.36	63.8658	-0.793458	-2.71456	0.00663645	0.0350784	63.8658	-0.158661	-0.576911	0.564	0.999983
ENSG00000004766.17_4	21	18	[ENST00000251739.9_1, ENST00000305866.10_2, ENST00000436177.5_1, ENST00000438395.5_1, ENST00000441602.5_1, ENST00000443443.1_1, ENST00000458530.1_1, ENST00000458707.1_1, ENST00000467326.5_1, ENST00000471188.5_1, ENST00000474412.1_1, ENST00000476413.1_1, ENST00000477572.1_1, ENST00000477935.1_1, ENST00000480943.5_1, ENST00000484954.1_1, ENST00000485140.1_1, ENST00000485994.5_1, ENST00000495039.1_1…	chr7:92861652-92990435	+	-	33	128783	9559	757	8802	0.920808	ENST00000251739.9_1, ENST00000305866.10_2, ENST00000436177.5_1, ENST00000438395.5_1, ENST00000441602.5_1, ENST00000443443.1_1, ENST00000458530.1_1, ENST00000458707.1_1, ENST00000467326.5_1, ENST00000471188.5_1, ENST00000474412.1_1, ENST00000476413.1_1, ENST00000477572.1_1, ENST00000477935.1_1, ENST00000480943.5_1, ENST00000484954.1_1, ENST00000485140.1_1, ENST00000485994.5_1, ENST00000495039.1_1,…	VPS50	lncRNA, nonsense_mediated_decay, protein_coding, retained_intron	CCDC132	4.31	9.87	7.48	9.34	12.72	10.34	12.77	15.81	7.46	153.958	-0.505818	-1.84672	0.0647871	0.178117	153.958	-0.103544	-0.387799	0.698165	0.999983
ENSG00000004776.13_3	3	3	[ENST00000004982.6_3, ENST00000587965.1_1, ENST00000592984.6_2]	chr19:36245466-36248980	-	-	3	3514	1724	0	1724	1	ENST00000004982.6_3, ENST00000587965.1_1, ENST00000592984.6_2	HSPB6	protein_coding	HSPB6	0.42	0.31	0.16	0.12	0.05	0	0.19	0.05	0.07	2.63876	1.73851	1.3867	0.165533	NA	2.63876	-0.697316	-0.473096	0.636144	NA
ENSG00000004777.18_3	13	13	[ENST00000007510.8_1, ENST00000221905.1_1, ENST00000314737.9_1, ENST00000378944.9_1, ENST00000586918.1_1, ENST00000587447.3_2, ENST00000587984.1_1, ENST00000588248.6_3, ENST00000589133.5_1, ENST00000590893.5_1, ENST00000591438.1_1, ENST00000593034.5_1, ENST00000601474.5_1]	chr19:36265433-36279724	+	-	25	14291	5260	0	5260	1	ENST00000007510.8_1, ENST00000221905.1_1, ENST00000314737.9_1, ENST00000378944.9_1, ENST00000586918.1_1, ENST00000587447.3_2, ENST00000587984.1_1, ENST00000588248.6_3, ENST00000589133.5_1, ENST00000590893.5_1, ENST00000591438.1_1, ENST00000593034.5_1, ENST00000601474.5_1	ARHGAP33	lncRNA, nonsense_mediated_decay, protein_coding, retained_intron	ARHGAP33	6.84	5.97	8.22	5.99	3.71	5.01	3.71	3.92	7.36	221.971	0.688497	2.24374	0.0248495	0.0908016	221.971	-0.0184394	-0.0597317	0.952369	0.999983
ENSG00000004779.10_3	5	5	[ENST00000007516.8_2, ENST00000484769.1_1, ENST00000562133.5_1, ENST00000567761.1_1, ENST00000570319.5_1]	chr16:23592334-23607637	-	-	7	15303	1548	341	1207	0.779716	ENST00000007516.8_2, ENST00000484769.1_1, ENST00000562133.5_1, ENST00000567761.1_1, ENST00000570319.5_1	NDUFAB1	nonsense_mediated_decay, protein_coding	NDUFAB1	64.47	94.69	94.29	89.36	135.99	120.12	108.61	143.94	82.83	688.592	-0.162963	-0.925047	0.354941	0.54635	688.592	0.0847037	0.483063	0.629051	0.999983
ENSG00000004799.8_3	5	5	[ENST00000005178.6_2, ENST00000468445.1_1, ENST00000473301.1_1, ENST00000473796.1_1, ENST00000498190.1_1]	chr7:95212810-95225828	-	-	9	13018	4544	0	4544	1	ENST00000005178.6_2, ENST00000468445.1_1, ENST00000473301.1_1, ENST00000473796.1_1, ENST00000498190.1_1	PDK4	protein_coding, retained_intron	PDK4	2.56	1.8	2.43	1.3	1.03	1.46	0.81	1.34	1.28	17.477	1.26687	2.53105	0.0113722	0.0517826	17.477	0.208645	0.401618	0.687965	0.999983
ENSG00000004809.14_5	8	8	[ENST00000330550.8_1, ENST00000368919.8_2, ENST00000424139.1_2, ENST00000434949.5_2, ENST00000437378.5_2, ENST00000451557.5_2, ENST00000460159.1_1, ENST00000461487.1_1]	chr6:110745889-110797844	-	-	11	51955	3907	983	2924	0.7484	ENST00000330550.8_1, ENST00000368919.8_2, ENST00000424139.1_2, ENST00000434949.5_2, ENST00000437378.5_2, ENST00000451557.5_2, ENST00000460159.1_1, ENST00000461487.1_1	SLC22A16	lncRNA, protein_coding	SLC22A16	0	0	0	0	0	0	0	0	0
ENSG00000004838.14_4	9	7	[ENST00000231749.8_3, ENST00000360165.7_2, ENST00000431869.1_1, ENST00000442887.1_1, ENST00000443080.5_1, ENST00000468182.1_1, ENST00000475688.1_1, ENST00000478269.5_1, ENST00000490675.5_1]	chr3:50378540-50383163	-	-	9	4623	2889	0	2889	1	ENST00000231749.8_3, ENST00000360165.7_2, ENST00000431869.1_1, ENST00000442887.1_1, ENST00000443080.5_1, ENST00000468182.1_1, ENST00000475688.1_1, ENST00000478269.5_1, ENST00000490675.5_1	ZMYND10	lncRNA, nonsense_mediated_decay, protein_coding, retained_intron	ZMYND10	0.65	0.78	1.57	0.54	0.46	0.3	0.59	0.62	0.58	9.64065	0.902397	1.38495	0.166068	NA	9.64065	-0.481249	-0.691315	0.489368	0.999983
ENSG00000004846.16_3	6	5	[ENST00000258738.10_1, ENST00000404938.6_1, ENST00000406935.5_1, ENST00000441315.1_2, ENST00000443026.6_1, ENST00000477094.5_1]	chr7:20654829-20816658	+	-	32	161829	9257	737	8520	0.920385	ENST00000258738.10_1, ENST00000404938.6_1, ENST00000406935.5_1, ENST00000441315.1_3, ENST00000443026.6_1, ENST00000477094.5_1	ABCB5	lncRNA, nonsense_mediated_decay, protein_coding	ABCB5	0.02	0	0.03	0	0	0	0	0	0	0.255587	2.07335	0.513766	0.607415	NA	0.255587	0	0	1	NA
ENSG00000004848.8_5	5	5	[ENST00000379044.5_2, ENST00000636609.1_1, ENST00000636885.1_1, ENST00000637394.1_1, ENST00000637993.1_3]	chrX:25021810-25034537	-	-	9	12727	3114	0	3114	1	ENST00000379044.5_2, ENST00000636609.1_1, ENST00000636885.1_1, ENST00000637394.1_1, ENST00000637993.1_3	ARX	lncRNA, protein_coding	ARX	0.56	0.73	0.64	0.49	0.51	0.39	0.36	0.47	0.59	19.2579	0.673729	1.47204	0.141009	0.296967	19.2579	0.00625367	0.0133125	0.989378	0.999983
ENSG00000004864.13_2	8	8	[ENST00000265631.9_1, ENST00000416240.6_1, ENST00000472162.2_1, ENST00000484495.5_1, ENST00000487710.1_1, ENST00000490072.5_1, ENST00000492869.1_1, ENST00000494085.1_1]	chr7:95749531-95951459	-	-	20	201928	3710	0	3710	1	ENST00000265631.9_1, ENST00000416240.6_1, ENST00000472162.2_1, ENST00000484495.5_1, ENST00000487710.1_1, ENST00000490072.5_1, ENST00000492869.1_1, ENST00000494085.1_1	SLC25A13	lncRNA, nonsense_mediated_decay, protein_coding	SLC25A13	19.71	25.03	20.55	27.36	33.21	33.35	32.23	40.09	31.84	966.346	-0.441169	-3.74135	0.000183032	0.002347	966.346	-0.115698	-0.992586	0.320912	0.999983
ENSG00000004866.20_6	30	25	[ENST00000265437.9_1, ENST00000323984.7_2, ENST00000393443.5_1, ENST00000393444.7_1, ENST00000393446.6_5, ENST00000393447.8_1, ENST00000393449.5_1, ENST00000393451.7_2, ENST00000417919.5_3, ENST00000420755.5_5, ENST00000421345.5_1, ENST00000422922.5_1, ENST00000432298.5_1, ENST00000434836.5_1, ENST00000438863.5_1, ENST00000443979.5_1, ENST00000446490.5_3, ENST00000449366.5_1, ENST00000462544.1_1,…	chr7:116593291-116870157	+	-	31	276866	6742	1329	5413	0.802878	ENST00000265437.9_1, ENST00000323984.7_2, ENST00000393443.5_1, ENST00000393444.7_1, ENST00000393446.6_5, ENST00000393447.8_1, ENST00000393449.5_1, ENST00000393451.7_2, ENST00000397750.7_1, ENST00000417919.5_3, ENST00000420755.5_5, ENST00000421345.5_1, ENST00000422922.5_1, ENST00000432298.5_1, ENST00000434836.5_1, ENST00000438863.5_1, ENST00000443979.5_1, ENST00000446490.5_3, ENST00000449366.5_1, …	ST7, ST7-OT4	lncRNA, misc_RNA, nonsense_mediated_decay, protein_coding, retained_intron	ST7-OT4, ST7	4.23	5.45	6.69	13.09	15.1	13.24	15.31	13.85	13.96	272.644	-1.17703	-6.55054	5.73288e-11	7.67048e-09	272.644	-0.032006	-0.186069	0.852391	0.999983
ENSG00000004897.12_5	19	17	[ENST00000066544.8_2, ENST00000525495.6_4, ENST00000526866.5_1, ENST00000527547.5_1, ENST00000528147.1_1, ENST00000528748.5_1, ENST00000531206.5_1, ENST00000532575.1_1, ENST00000532893.5_1, ENST00000533415.5_1, ENST00000570740.1_4, ENST00000570818.5_3, ENST00000571643.5_3, ENST00000573502.1_4, ENST00000573550.5_3, ENST00000574304.5_2, ENST00000575483.5_3, ENST00000575830.2_1, ENST00000576484.1_4]	chr17:45195068-45266788	-	-	22	71720	6824	148	6676	0.978312	ENST00000066544.8_2, ENST00000525495.6_4, ENST00000526866.5_1, ENST00000527547.5_1, ENST00000528147.1_1, ENST00000528748.5_1, ENST00000531206.5_1, ENST00000532575.1_1, ENST00000532893.5_1, ENST00000533415.5_1, ENST00000570740.1_4, ENST00000570818.5_3, ENST00000571643.5_3, ENST00000573502.1_4, ENST00000573550.5_3, ENST00000574304.5_2, ENST00000575483.5_3, ENST00000575830.2_1, ENST00000576484.1_4	CDC27	lncRNA, nonsense_mediated_decay, protein_coding, retained_intron	CDC27	45.92	60.4	56.42	83.6	79.2	75.54	80.83	86.68	89.35	912.554	-0.438283	-3.14177	0.00167931	0.0126244	912.554	-0.0794502	-0.573195	0.566513	0.999983
ENSG00000004939.15_4	5	5	[ENST00000262418.12_3, ENST00000399246.3_1, ENST00000471005.5_1, ENST00000498270.1_1, ENST00000631130.1_1]	chr17:42325757-42345509	-	-	20	19752	5125	726	4399	0.858341	ENST00000262418.12_3, ENST00000399246.3_1, ENST00000471005.5_1, ENST00000498270.1_1, ENST00000631130.1_1	SLC4A1	lncRNA, protein_coding, retained_intron	AC003102.1, SLC4A1	0	0	0	0	0	0	0	0	0
ENSG00000004948.14_4	8	5	[ENST00000359558.6_2, ENST00000360249.8_1, ENST00000394441.5_2, ENST00000415529.2_1, ENST00000421592.6_3, ENST00000423724.5_1, ENST00000426151.6_3, ENST00000649521.1_1]	chr7:93053798-93204042	-	-	17	150244	4227	0	4227	1	ENST00000359558.6_2, ENST00000360249.8_1, ENST00000394441.5_2, ENST00000415529.2_1, ENST00000423724.5_1, ENST00000426151.6_3, ENST00000649521.1_1	CALCR	nonsense_mediated_decay, protein_coding	CALCR	0.08	0.24	0.21	0.41	0.31	0.37	0.25	0.27	0.79	8.90931	-1.12784	-1.42911	0.152973	NA	8.90931	-0.207101	-0.281224	0.778538	0.999983
ENSG00000004961.15_3	3	3	[ENST00000321143.8_1, ENST00000380762.5_2, ENST00000380763.7_1]	chrX:11129420-11141206	+	-	7	11786	2343	0	2343	1	ENST00000321143.8_1, ENST00000380762.5_2, ENST00000380763.7_1	HCCS	protein_coding	HCCS	4.41	5.41	4.88	6.55	9.62	9.48	8.04	10.16	5.85	192.025	-0.465964	-2.36506	0.0180273	0.0725141	192.025	0.132638	0.691627	0.489172	0.999983
ENSG00000004975.12_3	15	14	[ENST00000005340.10_2, ENST00000571745.1_1, ENST00000572285.5_1, ENST00000573354.1_1, ENST00000574143.1_1, ENST00000574591.1_1, ENST00000574642.5_1, ENST00000575086.1_1, ENST00000575458.5_1, ENST00000575756.5_1, ENST00000576285.1_1, ENST00000576439.1_1, ENST00000576840.5_1, ENST00000576949.1_1, ENST00000577154.1_1]	chr17:7128660-7137836	-	-	10	9176	5321	647	4674	0.878406	ENST00000005340.10_2, ENST00000571745.1_1, ENST00000572285.5_1, ENST00000573354.1_1, ENST00000574143.1_1, ENST00000574591.1_1, ENST00000574642.5_1, ENST00000575086.1_1, ENST00000575458.5_1, ENST00000575756.5_1, ENST00000576285.1_1, ENST00000576439.1_1, ENST00000576840.5_1, ENST00000576949.1_1, ENST00000577154.1_1	DVL2	lncRNA, protein_coding, retained_intron	DVL2	6.22	8.13	7.93	7.37	6.62	6.37	10.21	7.69	7.75	185.472	0.0249849	0.124887	0.900613	0.946366	185.472	-0.301142	-1.5047	0.132401	0.890676
ENSG00000005001.10_3	8	8	[ENST00000161006.8_2, ENST00000570950.1_1, ENST00000571228.1_1, ENST00000572061.1_1, ENST00000574768.5_1, ENST00000575164.1_1, ENST00000576381.1_1, ENST00000577177.1_1]	chr16:2902730-2908171	-	-	8	5441	2384	0	2384	1	ENST00000161006.8_2, ENST00000570950.1_1, ENST00000571228.1_1, ENST00000572061.1_1, ENST00000574768.5_1, ENST00000575164.1_1, ENST00000576381.1_1, ENST00000577177.1_1	PRSS22	lncRNA, nonsense_mediated_decay, protein_coding, retained_intron	PRSS22	41.16	34.38	32.59	20.16	19.82	13.56	28.3	35.66	20.08	237.809	0.62226	2.86161	0.00421496	0.0252974	237.809	-0.597989	-2.69892	0.00695653	0.281921
ENSG00000005007.12_3	13	12	[ENST00000262803.9_2, ENST00000594243.1_1, ENST00000594504.5_1, ENST00000596842.5_1, ENST00000598209.5_1, ENST00000598471.1_1, ENST00000599848.5_2, ENST00000600012.5_1, ENST00000600310.5_1, ENST00000600689.1_1, ENST00000600868.5_1, ENST00000601689.1_1, ENST00000601981.5_1]	chr19:18942746-18979045	+	-	28	36299	8600	148	8452	0.982791	ENST00000262803.9_2, ENST00000594243.1_1, ENST00000594504.5_1, ENST00000596842.5_1, ENST00000598209.5_1, ENST00000598471.1_1, ENST00000599848.5_2, ENST00000600012.5_1, ENST00000600310.5_1, ENST00000600689.1_1, ENST00000600868.5_1, ENST00000601689.1_1, ENST00000601981.5_1	UPF1	lncRNA, protein_coding, retained_intron	UPF1	6.56	7.5	7.51	8.01	8.47	9.7	7.72	7.94	7.29	491.931	0.140184	1.08959	0.275895	0.465236	491.931	0.221408	1.73783	0.0822409	0.7846
ENSG00000005020.13_4	9	9	[ENST00000345317.7_2, ENST00000432747.1_1, ENST00000468712.5_1, ENST00000481204.5_1, ENST00000487720.1_1, ENST00000489977.5_1, ENST00000490456.6_1, ENST00000495802.5_1, ENST00000497511.5_1]	chr7:26706686-27034858	-	-	22	328172	5361	262	5099	0.951129	ENST00000345317.7_2, ENST00000432747.1_1, ENST00000468712.5_1, ENST00000481204.5_1, ENST00000487720.1_1, ENST00000489977.5_1, ENST00000490456.6_1, ENST00000495802.5_1, ENST00000497511.5_1	SKAP2	lncRNA, protein_coding, retained_intron	SKAP2	48.21	59.52	64.7	67.45	54.66	57.88	82.63	66.79	77.29	438.473	-0.177771	-0.972765	0.33067	0.522431	438.473	-0.305589	-1.67784	0.0933783	0.815322
ENSG00000005022.6_3	4	4	[ENST00000317881.9_2, ENST00000460013.1_1, ENST00000463551.1_1, ENST00000475354.1_1]	chrX:118602384-118605359	+	-	5	2975	1555	0	1555	1	ENST00000317881.9_2, ENST00000460013.1_1, ENST00000463551.1_1, ENST00000475354.1_1	SLC25A5	lncRNA, protein_coding	SLC25A5	248.21	343.48	316.3	413.37	411.17	435.31	431.81	444.39	411.47	5212.41	-0.282349	-2.46854	0.0135664	0.0587339	5212.41	-0.0012065	-0.0105672	0.991569	0.999983
ENSG00000005059.16_6	5	5	[ENST00000394650.7_2, ENST00000452915.3_1, ENST00000472310.5_1, ENST00000494604.1_1, ENST00000515114.3_1]	chr4:110481364-110609875	+	-	10	128511	3555	237	3318	0.933333	ENST00000394650.7_2, ENST00000452915.3_1, ENST00000472310.5_1, ENST00000494604.1_1, ENST00000515114.3_1	MCUB	lncRNA, protein_coding, retained_intron	CCDC109B	14.72	15.1	16.59	19.48	30.99	26.38	25.76	37.71	17.21	157.371	-0.540478	-2.29365	0.0218106	0.0827979	157.371	-0.021869	-0.094845	0.924438	0.999983
ENSG00000005073.5_2	2	2	[ENST00000006015.3_1, ENST00000517402.1_1]	chr7:27221128-27224842	-	-	2	3714	2307	0	2307	1	ENST00000006015.3_1, ENST00000517402.1_1	HOXA11	protein_coding	HOXA11	0.03	0	0.07	0.12	0.11	0.14	0.04	0.11	0	1.76234	-0.230479	-0.138627	0.889745	NA	1.76234	1.34864	0.895076	0.370746	NA
ENSG00000005075.15_2	2	2	[ENST00000292614.9_1, ENST00000393794.4_1]	chr7:102113564-102119354	-	-	4	5790	1355	0	1355	1	ENST00000292614.9_1, ENST00000393794.4_1	POLR2J	protein_coding	POLR2J	181.05	198.04	187.95	221.19	182.28	206.52	230.38	204.68	239.6	2113.43	-0.0336266	-0.2192	0.826495	0.903056	2113.43	-0.121094	-0.789714	0.429695	0.999983
ENSG00000005100.13_6	5	5	[ENST00000225296.8_2, ENST00000433302.7_1, ENST00000572490.1_1, ENST00000574023.1_3, ENST00000575153.5_1]	chr17:5344236-5372302	-	-	12	28066	5789	587	5202	0.898601	ENST00000225296.8_2, ENST00000433302.7_1, ENST00000572490.1_1, ENST00000574023.1_3, ENST00000575153.5_1	DHX33	nonsense_mediated_decay, protein_coding, retained_intron	DHX33, C1QBP	8.93	7.21	8.03	8.02	8.85	8.18	9.37	9.25	8.26	339.321	0.0855075	0.553283	0.580069	0.737248	339.321	-0.0693551	-0.452159	0.651154	0.999983
ENSG00000005102.13_3	4	2	[ENST00000318579.9_2, ENST00000329168.3_1, ENST00000393661.2_1, ENST00000549132.1_1]	chr17:41717756-41739290	-	-	3	21534	2674	0	2674	1	ENST00000318579.9_2, ENST00000329168.3_1, ENST00000393661.2_1, ENST00000549132.1_1	MEOX1	protein_coding	MEOX1	0	0	0	0	0	0	0	0	0
ENSG00000005108.16_4	5	4	[ENST00000408005.2_1, ENST00000423059.9_3, ENST00000480061.1_1, ENST00000497575.1_2, ENST00000617773.1_1]	chr7:11409991-11871824	-	-	29	461833	10921	199	10722	0.981778	ENST00000408005.2_1, ENST00000423059.9_4, ENST00000480061.1_1, ENST00000497575.1_3, ENST00000617773.1_1	THSD7A	lncRNA, protein_coding, retained_intron	THSD7A	0	0.05	0	0	0.05	0	0	0.01	0	0.599195	1.18468	0.355571	0.722162	NA	0.599195	0.928953	0.27802	0.780997	NA
ENSG00000005156.11_6	16	16	[ENST00000262327.9_3, ENST00000378526.8_3, ENST00000585370.1_2, ENST00000585740.5_1, ENST00000585941.5_2, ENST00000586058.1_1, ENST00000586119.1_1, ENST00000586407.1_1, ENST00000586435.1_1, ENST00000588109.5_2, ENST00000588713.1_1, ENST00000590181.5_1, ENST00000590630.5_1, ENST00000592244.1_1, ENST00000592690.1_2, ENST00000593099.5_1]	chr17:33307512-33336762	+	-	19	29250	12919	1937	10982	0.850066	ENST00000262327.9_3, ENST00000378526.8_3, ENST00000585370.1_3, ENST00000585740.5_1, ENST00000585941.5_3, ENST00000586058.1_1, ENST00000586119.1_1, ENST00000586407.1_1, ENST00000586435.1_1, ENST00000588109.5_3, ENST00000588713.1_1, ENST00000590181.5_1, ENST00000590630.5_1, ENST00000592244.1_1, ENST00000592690.1_3, ENST00000593099.5_1	LIG3	lncRNA, nonsense_mediated_decay, protein_coding, retained_intron	LIG3	12.54	18.25	17.11	19.17	20.95	16.64	19.62	16.75	16.67	448.163	0.0722963	0.434808	0.663702	0.797333	448.163	0.125749	0.763009	0.445458	0.999983
ENSG00000005175.10_4	7	7	[ENST00000005386.8_2, ENST00000380650.4_1, ENST00000432584.7_1, ENST00000547706.1_1, ENST00000548211.1_1, ENST00000548296.1_1, ENST00000551293.1_1]	chr12:48055031-48099813	-	-	19	44782	5350	990	4360	0.814953	ENST00000005386.8_2, ENST00000380650.4_1, ENST00000432584.7_1, ENST00000547706.1_1, ENST00000548211.1_1, ENST00000548296.1_1, ENST00000551293.1_1	RPAP3	lncRNA, protein_coding, retained_intron	RPAP3	3.37	3.79	4.25	5.1	8.14	6.96	6.65	7.18	4.53	156.982	-0.444674	-2.12891	0.0332616	0.11271	156.982	0.17282	0.85365	0.393299	0.999983
ENSG00000005187.12_4	15	15	[ENST00000289416.10_4, ENST00000440284.6_1, ENST00000501740.6_1, ENST00000561499.1_1, ENST00000561584.5_1, ENST00000561795.5_1, ENST00000562251.5_3, ENST00000563914.1_1, ENST00000564701.1_1, ENST00000567006.1_1, ENST00000567387.5_1, ENST00000567711.1_1, ENST00000568235.5_3, ENST00000569141.1_1, ENST00000614721.1_1]	chr16:20621564-20808903	+	-	24	187339	7510	4204	3306	0.440213	ENST00000289416.10_4, ENST00000440284.6_1, ENST00000501740.6_1, ENST00000561499.1_1, ENST00000561584.5_1, ENST00000561795.5_1, ENST00000562251.5_3, ENST00000563914.1_1, ENST00000564701.1_1, ENST00000567006.1_1, ENST00000567387.5_1, ENST00000567711.1_1, ENST00000568235.5_3, ENST00000569141.1_1, ENST00000614721.1_1	ACSM3	lncRNA, protein_coding, retained_intron	ACSM3	0	0.14	0.23	0.36	0.65	0.16	0.29	0.16	0.31	3.08993	-0.801361	-0.649575	0.515967	NA	3.08993	0.556881	0.478054	0.632612	NA
ENSG00000005189.19_5	19	19	[ENST00000261377.10_1, ENST00000348433.10_1, ENST00000561474.1_1, ENST00000563045.1_1, ENST00000563068.1_1, ENST00000563617.1_1, ENST00000564200.1_1, ENST00000564274.5_1, ENST00000565340.5_1, ENST00000566276.5_1, ENST00000566518.5_1, ENST00000566993.5_1, ENST00000567297.5_1, ENST00000568046.5_1, ENST00000568334.1_1, ENST00000568476.5_1, ENST00000568501.5_1, ENST00000568647.5_1, ENST00000568894.5_…	chr16:20817750-20860990	+	-	21	43240	4114	500	3614	0.878464	ENST00000261377.10_1, ENST00000348433.10_1, ENST00000561474.1_1, ENST00000563045.1_1, ENST00000563068.1_1, ENST00000563617.1_1, ENST00000564200.1_1, ENST00000564274.5_1, ENST00000565340.5_1, ENST00000566276.5_1, ENST00000566518.5_1, ENST00000566993.5_1, ENST00000567297.5_1, ENST00000568046.5_1, ENST00000568334.1_1, ENST00000568476.5_1, ENST00000568501.5_1, ENST00000568647.5_1, ENST00000568894.5_1	REXO5	lncRNA, nonsense_mediated_decay, protein_coding, retained_intron	AC004381.6	4.23	6.23	4.69	9.31	7.85	8.17	9.87	8.12	7.31	150.75	-0.518589	-2.41234	0.0158504	0.0661064	150.75	0.0327624	0.154474	0.877236	0.999983
ENSG00000005194.15_4	15	13	[ENST00000394391.9_2, ENST00000563341.1_2, ENST00000563561.1_1, ENST00000564885.1_1, ENST00000565368.5_1, ENST00000565786.5_1, ENST00000565961.5_1, ENST00000566284.1_1, ENST00000567518.5_1, ENST00000567751.5_1, ENST00000568940.5_1, ENST00000569246.5_1, ENST00000569370.5_1, ENST00000569979.5_1, ENST00000570000.5_1]	chr16:57462098-57481332	-	-	9	19234	3383	472	2911	0.860479	ENST00000394391.9_2, ENST00000563341.1_2, ENST00000563561.1_1, ENST00000564885.1_1, ENST00000565368.5_1, ENST00000565786.5_1, ENST00000565961.5_1, ENST00000566284.1_1, ENST00000567518.5_1, ENST00000567751.5_1, ENST00000568940.5_1, ENST00000569246.5_1, ENST00000569370.5_1, ENST00000569979.5_1, ENST00000570000.5_1	CIAPIN1	lncRNA, nonsense_mediated_decay, protein_coding, retained_intron	CIAPIN1	22.58	24.18	23.04	31.58	28.08	36.4	26.83	38.18	29.49	340.18	-0.197697	-1.19845	0.230742	0.414372	340.18	0.0635584	0.389127	0.697182	0.999983
ENSG00000005206.17_2	14	13	[ENST00000585725.2_1, ENST00000586111.3_1, ENST00000586332.5_1, ENST00000587851.1_1, ENST00000589515.2_1, ENST00000593243.5_1, ENST00000610743.4_1, ENST00000612623.1_2, ENST00000613503.5_2, ENST00000614784.1_1, ENST00000614794.4_1, ENST00000618220.4_1, ENST00000621568.4_1, ENST00000622308.4_1]	chr19:2328613-2355093	+	-	20	26480	7418	759	6659	0.897681	ENST00000585725.2_1, ENST00000586111.3_1, ENST00000586332.5_1, ENST00000587851.1_1, ENST00000589515.2_1, ENST00000593243.5_1, ENST00000610743.4_1, ENST00000612623.1_3, ENST00000613503.5_2, ENST00000614784.1_1, ENST00000614794.4_1, ENST00000618220.4_1, ENST00000621568.4_1, ENST00000621615.1_1, ENST00000622308.4_1	AC005258.1, SPPL2B	lncRNA, nonsense_mediated_decay, protein_coding, retained_intron		3.41	3.92	2.56	3.05	3.38	3.11	2.93	3.64	2.68	88.9013	0.330048	1.38385	0.166406	0.331903	88.9013	0.0815246	0.339118	0.734521	0.999983
ENSG00000005238.19_2	9	8	[ENST00000322813.9_1, ENST00000378557.1_1, ENST00000378561.5_1, ENST00000378566.5_1, ENST00000488109.6_1, ENST00000603301.5_1, ENST00000605104.1_1, ENST00000605244.5_1, ENST00000605392.1_1]	chr9:35104108-35116338	-	-	10	12230	6409	395	6014	0.938368	ENST00000322813.9_1, ENST00000378557.1_1, ENST00000378561.5_1, ENST00000378566.5_1, ENST00000488109.6_1, ENST00000603301.5_1, ENST00000605104.1_1, ENST00000605244.5_1, ENST00000605392.1_1	FAM214B	lncRNA, protein_coding	FAM214B	6.47	8.29	6.28	5.47	4.18	5.07	4.6	4.03	4.83	182.679	0.866137	4.02075	5.80125e-05	0.000953392	182.679	0.159195	0.729307	0.465814	0.999983
ENSG00000005243.10_4	10	10	[ENST00000579263.1_3, ENST00000580174.1_1, ENST00000580409.5_1, ENST00000581637.5_2, ENST00000581756.5_3, ENST00000583414.5_1, ENST00000584955.5_3, ENST00000585182.1_1, ENST00000612370.4_1, ENST00000621465.5_2]	chr17:46103532-46115392	-	-	14	11860	1862	130	1732	0.930183	ENST00000579263.1_3, ENST00000580174.1_1, ENST00000580409.5_1, ENST00000581637.5_2, ENST00000581756.5_3, ENST00000583414.5_1, ENST00000584955.5_3, ENST00000585182.1_1, ENST00000612370.4_1, ENST00000621465.5_2	COPZ2	lncRNA, nonsense_mediated_decay, protein_coding, retained_intron	COPZ2	2.35	3.45	2.96	3.65	4.61	4.31	2.33	3.9	4.21	21.9066	-0.0253967	-0.0577366	0.953958	0.974409	21.9066	0.299991	0.688109	0.491384	0.999983
ENSG00000005249.13_3	3	3	[ENST00000265717.5_2, ENST00000393613.6_1, ENST00000488792.1_1]	chr7:106685149-106802256	+	-	13	117107	4262	360	3902	0.915533	ENST00000265717.5_2, ENST00000393613.6_1, ENST00000488792.1_1	PRKAR2B	lncRNA, protein_coding	PRKAR2B	2.42	3.3	2.7	6.54	6.63	5.63	5.79	7.71	4.56	220.165	-0.860998	-4.60505	4.12375e-06	0.000107738	220.165	0.103098	0.572872	0.566732	0.999983
ENSG00000005302.18_5	50	37	[ENST00000312196.9_3, ENST00000337339.7_2, ENST00000361672.6_1, ENST00000380691.3_2, ENST00000380692.7_2, ENST00000380693.8_3, ENST00000398527.7_2, ENST00000421368.3_2, ENST00000467141.2_2, ENST00000468149.5_1, ENST00000473380.2_2, ENST00000476743.5_3, ENST00000478462.5_1, ENST00000482871.6_3, ENST00000483645.6_2, ENST00000494268.1_1, ENST00000647599.1_1, ENST00000647701.1_1, ENST00000647839.1_1,…	chrX:11776277-11793891	+	-	10	17614	9780	1519	8261	0.844683	ENST00000312196.9_3, ENST00000337339.7_2, ENST00000361672.6_1, ENST00000380691.3_2, ENST00000380692.7_2, ENST00000380693.8_3, ENST00000398527.7_2, ENST00000421368.3_2, ENST00000467141.2_2, ENST00000468149.5_1, ENST00000473380.2_2, ENST00000476743.5_3, ENST00000478462.5_1, ENST00000482871.6_3, ENST00000483645.6_2, ENST00000494268.1_1, ENST00000647599.1_1, ENST00000647701.1_1, ENST00000647839.1_1, …	MSL3	nonsense_mediated_decay, protein_coding, retained_intron	MSL3	8.18	12.21	7.48	11.47	11.11	13.12	10.36	9.79	13.29	286.137	-0.0554053	-0.245809	0.80583	0.891644	286.137	0.113283	0.506252	0.61268	0.999983
ENSG00000005339.14_5	20	20	[ENST00000262367.9_2, ENST00000382070.7_2, ENST00000570939.2_2, ENST00000571763.5_1, ENST00000571826.5_2, ENST00000572134.1_1, ENST00000572569.1_1, ENST00000573517.6_2, ENST00000573672.1_1, ENST00000574740.1_1, ENST00000575237.2_1, ENST00000576720.1_1, ENST00000634839.1_1, ENST00000635753.1_1, ENST00000635899.1_1, ENST00000635919.1_1, ENST00000636002.1_1, ENST00000636895.1_1, ENST00000637492.1_2,…	chr16:3775054-3930727	-	-	37	155673	15492	1183	14309	0.923638	ENST00000262367.9_2, ENST00000382070.7_2, ENST00000570939.2_3, ENST00000571763.5_1, ENST00000571826.5_2, ENST00000572134.1_1, ENST00000572569.1_1, ENST00000573517.6_2, ENST00000573672.1_1, ENST00000574740.1_1, ENST00000575237.2_1, ENST00000576720.1_1, ENST00000634839.1_1, ENST00000635753.1_1, ENST00000635899.1_1, ENST00000635919.1_1, ENST00000636002.1_1, ENST00000636895.1_1, ENST00000637492.1_3, …	CREBBP	lncRNA, protein_coding, retained_intron	CREBBP	39.03	44.13	47.4	45.59	41.01	44.7	47.58	45	51.83	3492.84	0.0695414	0.488749	0.625019	0.769067	3492.84	-0.115377	-0.810866	0.417442	0.999983
ENSG00000005379.17_6	11	11	[ENST00000268893.10_1, ENST00000343736.9_2, ENST00000577871.1_1, ENST00000578486.1_1, ENST00000578511.5_1, ENST00000580669.6_2, ENST00000581675.5_1, ENST00000581692.2_1, ENST00000582679.1_1, ENST00000583624.1_1, ENST00000585149.1_1]	chr17:56378588-56406156	-	-	28	27568	11389	752	10637	0.933971	ENST00000268893.10_1, ENST00000343736.9_2, ENST00000577871.1_1, ENST00000578486.1_1, ENST00000578511.5_1, ENST00000580669.6_2, ENST00000581675.5_1, ENST00000581692.2_1, ENST00000582679.1_1, ENST00000583624.1_1, ENST00000585149.1_1	TSPOAP1	protein_coding, retained_intron	BZRAP1	0	0.27	0	0	0	0	0	0	0	0.90226	3.9483	1.08288	0.278863	NA	0.90226	0	0	1	NA
ENSG00000005381.7_2	5	5	[ENST00000225275.3_1, ENST00000577220.1_1, ENST00000578493.1_1, ENST00000580005.1_1, ENST00000581022.1_1]	chr17:56347216-56358296	-	-	12	11080	3526	215	3311	0.939024	ENST00000225275.3_1, ENST00000577220.1_1, ENST00000578493.1_1, ENST00000580005.1_1, ENST00000581022.1_1	MPO	lncRNA, protein_coding, retained_intron	MPO	0	0	0	0	0	0	0	0	0
ENSG00000005421.8_2	4	4	[ENST00000222381.7_1, ENST00000433729.1_1, ENST00000462594.1_1, ENST00000470502.1_1]	chr7:94926987-94954019	-	-	9	27032	2832	143	2689	0.949506	ENST00000222381.7_1, ENST00000433729.1_1, ENST00000462594.1_1, ENST00000470502.1_1	PON1	nonsense_mediated_decay, protein_coding, retained_intron	PON1	0	0	0	0	0	0	0	0	0
ENSG00000005436.13_5	11	11	[ENST00000321027.7_4, ENST00000409857.7_3, ENST00000427862.1_3, ENST00000442309.5_2, ENST00000470197.5_1, ENST00000470285.1_3, ENST00000470503.1_2, ENST00000472230.5_1, ENST00000486016.1_1, ENST00000492826.1_2, ENST00000541687.5_2]	chr2:75879125-75938115	-	-	18	58990	5465	611	4854	0.888198	ENST00000321027.7_4, ENST00000409857.7_3, ENST00000427862.1_3, ENST00000442309.5_2, ENST00000470197.5_1, ENST00000470285.1_3, ENST00000470503.1_2, ENST00000472230.5_1, ENST00000486016.1_1, ENST00000492826.1_2, ENST00000541687.5_2	GCFC2	nonsense_mediated_decay, protein_coding, retained_intron	GCFC2	1.53	3.36	1.05	3.92	4.64	4.31	4.77	6.29	2.46	72.7797	-0.980873	-2.55205	0.0107092	0.0495336	72.7797	-0.00240066	-0.00644033	0.994861	0.999983
ENSG00000005448.16_3	13	9	[ENST00000348227.4_2, ENST00000409791.5_2, ENST00000426787.5_2, ENST00000461531.5_1, ENST00000465134.5_1, ENST00000468778.5_1, ENST00000469321.5_1, ENST00000469932.5_1, ENST00000475328.5_1, ENST00000480089.5_1, ENST00000482605.1_2, ENST00000482880.5_1, ENST00000493982.5_1]	chr2:74648804-74652882	+	-	5	4078	2860	390	2470	0.863636	ENST00000348227.4_2, ENST00000409791.5_2, ENST00000426787.5_3, ENST00000461531.5_1, ENST00000465134.5_1, ENST00000468778.5_1, ENST00000469321.5_1, ENST00000469932.5_1, ENST00000475328.5_1, ENST00000480089.5_1, ENST00000482605.1_3, ENST00000482880.5_1, ENST00000493982.5_1	WDR54	lncRNA, protein_coding, retained_intron	WDR54	15.78	12.83	16.18	13.8	19.83	18.29	16.38	25.33	15.84	196.738	-0.111692	-0.55045	0.58201	0.738918	196.738	-0.110763	-0.550126	0.582233	0.999983
ENSG00000005469.11_2	7	7	[ENST00000331536.7_1, ENST00000412227.6_1, ENST00000419147.6_1, ENST00000442291.1_1, ENST00000469785.1_1, ENST00000479014.1_1, ENST00000488850.1_1]	chr7:86974996-87029111	+	-	20	54115	4979	507	4472	0.898172	ENST00000331536.7_1, ENST00000412227.6_1, ENST00000419147.6_1, ENST00000442291.1_1, ENST00000469785.1_1, ENST00000479014.1_1, ENST00000488850.1_1	CROT	protein_coding, retained_intron	CROT	3.83	3.26	4.07	5.29	5.96	7.23	5.45	6.41	2.85	137.259	-0.139725	-0.556467	0.577892	0.735186	137.259	0.384991	1.56315	0.118018	0.865008
ENSG00000005471.17_6	13	13	[ENST00000265723.8_2, ENST00000358400.7_2, ENST00000359206.8_4, ENST00000417608.1_3, ENST00000440025.1_2, ENST00000453593.5_2, ENST00000467079.1_1, ENST00000467983.1_1, ENST00000469770.1_1, ENST00000473795.1_1, ENST00000643670.1_2, ENST00000644106.1_1, ENST00000649586.1_2]	chr7:87031012-87109751	-	-	34	78739	7727	1648	6079	0.786722	ENST00000265723.8_2, ENST00000358400.7_2, ENST00000359206.8_5, ENST00000417608.1_4, ENST00000440025.1_3, ENST00000453593.5_2, ENST00000467079.1_1, ENST00000467983.1_1, ENST00000469770.1_1, ENST00000473795.1_1, ENST00000643670.1_3, ENST00000644106.1_1, ENST00000649586.1_2	ABCB4	nonsense_mediated_decay, protein_coding, retained_intron	ABCB4	0.11	0.42	0.52	0.46	0.65	0.29	0.62	0.48	0.19	12.2953	-0.079409	-0.11565	0.90793	0.949731	12.2953	0.161539	0.245157	0.806335	0.999983
ENSG00000005483.20_5	16	15	[ENST00000257745.8_1, ENST00000311117.7_1, ENST00000334884.9_1, ENST00000468607.1_1, ENST00000473063.1_3, ENST00000474203.5_1, ENST00000476671.5_1, ENST00000478079.1_3, ENST00000478990.5_3, ENST00000479838.2_1, ENST00000480368.5_1, ENST00000482560.6_1, ENST00000485619.1_1, ENST00000495267.5_1, ENST00000496191.1_1, ENST00000622386.1_1]	chr7:104654625-104754808	+	-	31	100183	9231	313	8918	0.966093	ENST00000257745.8_1, ENST00000311117.8_2, ENST00000334884.9_1, ENST00000468607.1_1, ENST00000473063.1_3, ENST00000474203.5_1, ENST00000476671.5_1, ENST00000478079.1_3, ENST00000478990.5_3, ENST00000479838.2_1, ENST00000480368.5_1, ENST00000482560.6_1, ENST00000485619.1_1, ENST00000495267.5_1, ENST00000496191.1_1, ENST00000622386.1_1, ENST00000667857.1_1	KMT2E	lncRNA, nonsense_mediated_decay, protein_coding, retained_intron	MLL5	40.49	42.09	35.89	32.73	31.59	30.69	34.04	32.2	37.89	2976.46	0.405203	2.73695	0.00620123	0.0333773	2976.46	-0.112315	-0.757653	0.448658	0.999983
ENSG00000005486.17_3	9	9	[ENST00000006777.11_2, ENST00000318622.8_1, ENST00000428119.1_1, ENST00000454791.1_1, ENST00000466232.5_1, ENST00000467406.2_1, ENST00000468304.1_1, ENST00000468644.5_1, ENST00000476218.1_1]	chr7:75471919-75518244	+	-	8	46325	2390	143	2247	0.940167	ENST00000006777.11_2, ENST00000318622.8_1, ENST00000428119.1_1, ENST00000454791.1_1, ENST00000466232.5_1, ENST00000467406.2_1, ENST00000468304.1_1, ENST00000468644.5_1, ENST00000476218.1_1	RHBDD2	lncRNA, nonsense_mediated_decay, protein_coding	RHBDD2	129.7	129.79	129.67	120.97	116.66	124.93	89.17	93.29	103.65	1872.64	0.665378	4.87911	1.06567e-06	3.52017e-05	1872.64	0.364107	2.67101	0.00756227	0.292746
ENSG00000005513.10_3	2	2	[ENST00000293894.4_2, ENST00000566034.1_1]	chr16:1031769-1036979	+	-	2	5210	4470	0	4470	1	ENST00000293894.4_2, ENST00000566034.1_1	SOX8	protein_coding, retained_intron	SOX8	0.05	0	0	0	0	0.02	0	0	0	0.384166	2.15479	0.535348	0.592409	NA	0.384166	0.906501	0.222157	0.824192	NA
ENSG00000005700.15_4	10	7	[ENST00000306270.12_3, ENST00000369751.2_1, ENST00000445419.6_1, ENST00000471036.1_2, ENST00000503400.5_1, ENST00000503631.5_1, ENST00000505222.5_1, ENST00000508381.1_1, ENST00000510291.5_2, ENST00000610980.4_1]	chr6:82879702-82957471	-	-	28	77769	8719	687	8032	0.921207	ENST00000306270.12_3, ENST00000369751.2_1, ENST00000445419.6_1, ENST00000471036.1_3, ENST00000503400.5_1, ENST00000503631.5_1, ENST00000505222.5_1, ENST00000508381.1_1, ENST00000510291.5_2, ENST00000610980.4_1	IBTK	nonsense_mediated_decay, protein_coding, retained_intron	IBTK	8.3	9.32	10.83	6.87	11.72	11.33	10.46	12.95	7.73	320.428	0.114221	0.579252	0.562419	0.724618	320.428	-0.0239341	-0.122165	0.902768	0.999983
ENSG00000005801.18_6	31	24	[ENST00000005082.13_1, ENST00000330692.11_1, ENST00000343338.11_1, ENST00000354599.10_1, ENST00000399602.9_2, ENST00000427810.6_1, ENST00000429541.6_1, ENST00000438262.6_1, ENST00000524857.5_1, ENST00000525313.6_1, ENST00000525502.5_5, ENST00000526501.5_1, ENST00000526540.5_1, ENST00000526598.1_1, ENST00000526601.5_1, ENST00000527386.1_1, ENST00000528218.5_1, ENST00000528410.5_3, ENST00000528636.…	chr11:3360490-3400452	-	-	11	39962	11711	6862	4849	0.414055	ENST00000005082.13_1, ENST00000330692.11_1, ENST00000343338.11_1, ENST00000354599.10_1, ENST00000399602.9_2, ENST00000427810.6_1, ENST00000429541.6_1, ENST00000438262.6_1, ENST00000524857.5_1, ENST00000525313.6_1, ENST00000525502.5_5, ENST00000526501.5_1, ENST00000526540.5_1, ENST00000526598.1_1, ENST00000526601.5_1, ENST00000527386.1_1, ENST00000528218.5_1, ENST00000528410.5_3, ENST00000528636.1…	ZNF195	lncRNA, nonsense_mediated_decay, protein_coding, retained_intron	ZNF195	10.37	9.75	9.51	8.2	13.61	9.45	8.48	12.64	7.36	378.958	0.310269	1.61371	0.10659	0.248952	378.958	0.17115	0.894529	0.371039	0.999983
ENSG00000005810.18_2	12	12	[ENST00000357337.10_2, ENST00000429715.1_1, ENST00000462987.2_1, ENST00000466564.2_1, ENST00000474882.2_1, ENST00000482517.5_1, ENST00000485061.2_1, ENST00000486679.2_1, ENST00000491491.1_1, ENST00000498073.2_1, ENST00000544440.7_2, ENST00000612956.4_1]	chr13:77618791-77901229	-	-	87	282438	15987	69	15918	0.995684	ENST00000357337.10_2, ENST00000429715.1_1, ENST00000462987.2_1, ENST00000466564.2_1, ENST00000474882.2_1, ENST00000482517.5_1, ENST00000485061.2_1, ENST00000486679.2_1, ENST00000491491.1_1, ENST00000498073.2_1, ENST00000544440.7_2, ENST00000612956.4_1	MYCBP2	lncRNA, protein_coding	MYCBP2	7.65	10.15	7.14	9.81	9.56	8.45	8.82	9.31	7.68	627.087	0.179968	1.20534	0.228071	0.411527	627.087	0.144949	0.976075	0.329027	0.999983
ENSG00000005812.11_6	6	6	[ENST00000355619.10_2, ENST00000417323.1_1, ENST00000470210.1_1, ENST00000472949.1_4, ENST00000477982.2_1, ENST00000485797.2_1]	chr13:77566732-77601330	-	-	7	34598	7076	496	6580	0.929904	ENST00000355619.10_2, ENST00000417323.1_1, ENST00000470210.1_1, ENST00000472949.1_4, ENST00000477982.2_1, ENST00000485797.2_1	FBXL3	lncRNA, protein_coding	FBXL3	2.5	2.59	2.67	4.32	4.24	3.56	3.9	4.48	3.03	130.162	-0.316721	-1.58253	0.11353	0.259546	130.162	0.124886	0.644067	0.519532	0.999983
ENSG00000005844.17_4	19	17	[ENST00000356798.10_1, ENST00000358164.9_1, ENST00000433423.2_2, ENST00000562020.1_1, ENST00000562652.1_1, ENST00000562857.5_1, ENST00000563615.5_1, ENST00000564118.1_4, ENST00000564632.1_1, ENST00000564935.1_1, ENST00000565348.5_1, ENST00000565864.5_1, ENST00000566149.1_1, ENST00000566267.1_1, ENST00000568012.5_1, ENST00000568926.5_1, ENST00000568987.1_1, ENST00000569570.5_1, ENST00000569725.1_4]	chr16:30483978-30534506	+	-	32	50528	6472	1206	5266	0.813659	ENST00000356798.10_1, ENST00000358164.9_1, ENST00000433423.2_2, ENST00000562020.1_1, ENST00000562652.1_1, ENST00000562857.5_1, ENST00000563615.5_1, ENST00000564118.1_5, ENST00000564632.1_1, ENST00000564935.1_1, ENST00000565348.5_1, ENST00000565864.5_1, ENST00000566149.1_1, ENST00000566267.1_1, ENST00000568012.5_1, ENST00000568926.5_1, ENST00000568987.1_1, ENST00000569570.5_1, ENST00000569725.1_5	ITGAL	lncRNA, nonsense_mediated_decay, protein_coding, retained_intron	ITGAL	0.02	0.19	0	0.21	0	0.04	0.02	0.17	0	1.13679	0.0739357	0.0334296	0.973332	NA	1.13679	0.464068	0.214197	0.830393	NA
ENSG00000005882.11_4	16	15	[ENST00000007708.7_1, ENST00000503076.1_1, ENST00000503176.5_1, ENST00000503614.5_3, ENST00000505440.5_1, ENST00000505897.5_1, ENST00000506242.5_1, ENST00000506647.1_1, ENST00000508030.5_2, ENST00000508960.1_1, ENST00000510219.2_3, ENST00000511026.1_1, ENST00000512204.5_1, ENST00000512238.1_1, ENST00000515040.5_1, ENST00000614357.4_1]	chr17:48172100-48189516	+	-	13	17416	5481	524	4957	0.904397	ENST00000007708.7_1, ENST00000503076.1_1, ENST00000503176.5_1, ENST00000503614.5_3, ENST00000505440.5_1, ENST00000505897.5_1, ENST00000506242.5_1, ENST00000506647.1_1, ENST00000508030.5_2, ENST00000508960.1_1, ENST00000510219.2_3, ENST00000511026.1_1, ENST00000512204.5_1, ENST00000512238.1_1, ENST00000515040.5_1, ENST00000614357.4_1	PDK2	lncRNA, protein_coding, retained_intron	PDK2	78.32	82.25	76.58	92.55	83.39	89.4	99.02	75.45	96.28	791.445	0.0260722	0.152769	0.87858	0.933179	791.445	-0.00870485	-0.0510095	0.959318	0.999983
ENSG00000005884.18_3	16	16	[ENST00000007722.11_2, ENST00000320031.13_3, ENST00000504417.1_1, ENST00000505306.5_1, ENST00000505552.1_1, ENST00000505612.1_1, ENST00000506401.6_1, ENST00000506437.1_1, ENST00000506827.1_1, ENST00000507771.5_1, ENST00000508100.1_1, ENST00000510809.1_1, ENST00000512553.5_1, ENST00000514834.1_1, ENST00000515147.1_1, ENST00000570989.1_1]	chr17:48133331-48167845	+	-	24	34514	9802	2133	7669	0.782391	ENST00000007722.11_2, ENST00000320031.13_3, ENST00000504417.1_1, ENST00000505306.5_1, ENST00000505552.1_1, ENST00000505612.1_1, ENST00000506401.6_1, ENST00000506437.1_1, ENST00000506827.1_1, ENST00000507771.5_1, ENST00000508100.1_1, ENST00000510809.1_1, ENST00000512553.5_1, ENST00000514834.1_1, ENST00000515147.1_1, ENST00000570989.1_1	ITGA3	nonsense_mediated_decay, protein_coding, retained_intron	ITGA3	37.32	35.22	36.34	27.21	25.99	29.98	20.69	25.24	25.01	788.257	0.849889	5.88617	3.95249e-09	3.1539e-07	788.257	0.260413	1.79374	0.0728553	0.754341
ENSG00000005889.15_3	11	11	[ENST00000304543.9_2, ENST00000338565.3_2, ENST00000379177.5_2, ENST00000379188.7_3, ENST00000419690.5_1, ENST00000428571.5_1, ENST00000459724.1_1, ENST00000474385.1_1, ENST00000480195.1_1, ENST00000497813.1_1, ENST00000539115.5_1]	chrX:24167289-24234372	+	-	18	67083	9037	867	8170	0.904061	ENST00000304543.9_2, ENST00000338565.3_2, ENST00000379177.5_2, ENST00000379188.7_3, ENST00000419690.5_1, ENST00000428571.5_1, ENST00000459724.1_1, ENST00000474385.1_1, ENST00000480195.1_1, ENST00000497813.1_1, ENST00000539115.5_1	ZFX	lncRNA, protein_coding	ZFX	4.44	5.44	4.67	6.26	5.5	7.74	6.21	7.5	6.4	244.313	-0.235149	-1.30536	0.191769	0.365282	244.313	-0.010751	-0.0604415	0.951804	0.999983
ENSG00000005893.15_3	4	3	[ENST00000200639.8_3, ENST00000371335.4_2, ENST00000434600.6_2, ENST00000486593.5_1]	chrX:119561681-119603220	-	-	11	41539	5526	321	5205	0.941911	ENST00000200639.8_3, ENST00000371335.4_2, ENST00000434600.6_2, ENST00000486593.5_1	LAMP2	nonsense_mediated_decay, protein_coding	LAMP2	46.98	61.45	50.41	70.69	80.13	75.12	76.14	90.35	61.24	1325.51	-0.281388	-2.42983	0.0151061	0.0636664	1325.51	0.030273	0.263391	0.792249	0.999983
ENSG00000005961.18_4	10	9	[ENST00000262407.5_1, ENST00000587295.5_3, ENST00000589645.5_1, ENST00000591990.5_1, ENST00000592075.5_1, ENST00000592226.5_1, ENST00000592253.5_1, ENST00000592462.5_1, ENST00000592944.1_1, ENST00000648408.1_1]	chr17:42449547-42466873	-	-	23	17326	5551	272	5279	0.951	ENST00000262407.5_1, ENST00000587295.5_3, ENST00000589645.5_1, ENST00000591990.5_1, ENST00000592075.5_1, ENST00000592226.5_1, ENST00000592253.5_1, ENST00000592462.5_1, ENST00000592944.1_1, ENST00000648408.1_1	ITGA2B	protein_coding, retained_intron	ITGA2B	0.73	0.78	0.91	0.36	0.23	0.76	0.66	0.32	0.59	11.5867	0.868665	1.33326	0.182447	0.35268	11.5867	-0.237022	-0.351716	0.725051	0.999983
ENSG00000005981.13_3	3	3	[ENST00000257621.4_1, ENST00000325885.6_2, ENST00000428113.5_1]	chr7:95107755-95169545	+	-	6	61790	4606	756	3850	0.835866	ENST00000257621.4_1, ENST00000325885.6_2, ENST00000428113.5_1	ASB4	lncRNA, protein_coding	ASB4	0	0	0	0	0	0	0	0	0
ENSG00000006007.12_3	5	5	[ENST00000353258.8_2, ENST00000563645.1_1, ENST00000564172.1_1, ENST00000569773.1_1, ENST00000569899.5_1]	chr16:19513014-19533445	-	-	7	20431	4390	1396	2994	0.682005	ENST00000353258.8_2, ENST00000563645.1_1, ENST00000564172.1_1, ENST00000569773.1_1, ENST00000569899.5_1	GDE1	nonsense_mediated_decay, protein_coding, retained_intron	GDE1	18.1	21.91	19.17	26.05	30.26	30.92	31.59	37.14	23.06	893.294	-0.389685	-3.03174	0.00243146	0.0168977	893.294	-0.0291393	-0.228804	0.819021	0.999983
ENSG00000006015.17_5	8	8	[ENST00000358607.10_2, ENST00000450195.6_2, ENST00000595077.1_1, ENST00000595490.1_3, ENST00000597371.1_1, ENST00000598375.5_1, ENST00000600997.5_1, ENST00000601736.1_1]	chr19:18699494-18703146	+	-	3	3652	3370	880	2490	0.738872	ENST00000358607.10_2, ENST00000450195.6_2, ENST00000595077.1_1, ENST00000595490.1_3, ENST00000597371.1_1, ENST00000598375.5_1, ENST00000600997.5_1, ENST00000601736.1_1	REX1BD	nonsense_mediated_decay, protein_coding, retained_intron	C19orf60	2.79	2.44	1.87	1.95	3.21	3.57	2.41	3.32	3.37	54.7653	-0.13085	-0.39557	0.692423	0.817368	54.7653	-0.0444603	-0.13631	0.891577	0.999983
ENSG00000006016.11_3	5	5	[ENST00000392386.8_2, ENST00000593286.1_1, ENST00000594325.1_1, ENST00000596360.1_1, ENST00000597131.1_1]	chr19:18683029-18718551	-	-	12	35522	2967	295	2672	0.900573	ENST00000392386.8_2, ENST00000593286.1_1, ENST00000594325.1_1, ENST00000596360.1_1, ENST00000597131.1_1	CRLF1	lncRNA, protein_coding, retained_intron	CRLF1	11.48	9.79	10.97	6.48	5.97	4.42	3.94	8.2	8.59	116.177	0.889611	2.96306	0.00304598	0.019903	116.177	-0.253267	-0.827104	0.408178	0.999983
ENSG00000006025.12_4	11	11	[ENST00000007414.8_2, ENST00000392507.7_1, ENST00000578461.1_3, ENST00000579728.5_1, ENST00000580140.5_1, ENST00000580226.5_1, ENST00000580808.1_1, ENST00000583167.5_1, ENST00000584698.1_1, ENST00000585051.1_1, ENST00000613735.4_1]	chr17:45884737-45899200	-	-	18	14463	6572	546	6026	0.91692	ENST00000007414.8_2, ENST00000392507.7_1, ENST00000578461.1_3, ENST00000579728.5_1, ENST00000580140.5_1, ENST00000580226.5_1, ENST00000580808.1_1, ENST00000583167.5_1, ENST00000584698.1_1, ENST00000585051.1_1, ENST00000613735.4_1	AC003665.1	nonsense_mediated_decay, protein_coding, retained_intron	OSBPL7	9.55	8.8	11.5	7.69	9.62	7.08	8.1	9.86	6.75	272.293	0.517119	2.99426	0.00275115	0.0184421	272.293	0.0181497	0.104016	0.917157	0.999983
ENSG00000006042.12_5	9	8	[ENST00000261713.8_3, ENST00000394642.7_2, ENST00000395149.6_3, ENST00000439138.5_4, ENST00000578289.5_1, ENST00000579849.6_3, ENST00000582227.5_1, ENST00000583120.1_1, ENST00000583437.2_1]	chr17:31254927-31272124	+	-	9	17197	5187	1060	4127	0.795643	ENST00000261713.8_3, ENST00000394642.7_2, ENST00000395149.6_3, ENST00000439138.5_4, ENST00000578289.5_1, ENST00000579849.6_3, ENST00000582227.5_1, ENST00000583120.1_1, ENST00000583437.2_1	TMEM98	protein_coding, retained_intron	TMEM98	0.42	0.05	0.23	0.92	0.79	1.44	0.48	1.19	0.37	5.67633	-1.37952	-1.41614	0.156735	NA	5.67633	0.686957	0.741785	0.458218	0.999983
ENSG00000006047.13_3	7	7	[ENST00000007699.10_2, ENST00000570627.1_1, ENST00000570720.1_1, ENST00000571127.1_1, ENST00000571464.1_1, ENST00000571485.5_1, ENST00000571834.5_1]	chr17:7191581-7197958	-	-	6	6377	4631	175	4456	0.962211	ENST00000007699.10_2, ENST00000570627.1_1, ENST00000570720.1_1, ENST00000571127.1_1, ENST00000571464.1_1, ENST00000571485.5_1, ENST00000571834.5_1	YBX2	lncRNA, protein_coding, retained_intron	YBX2	30.01	36.1	42.27	37.73	38.66	41.15	49.58	49.3	54.79	656.571	-0.287631	-1.86063	0.062796	0.174527	656.571	-0.365006	-2.36741	0.0179133	0.465585
ENSG00000006059.3_2	1	1	[ENST00000007735.3_1]	chr17:39502343-39507064	-	-	7	4721	1287	0	1287	1	ENST00000007735.3_1	KRT33A	protein_coding	KRT33A	0	0	0	0	0	0	0	0	0
ENSG00000006062.16_4	7	6	[ENST00000344686.8_3, ENST00000376926.8_1, ENST00000586644.2_2, ENST00000592267.1_1, ENST00000617331.2_3, ENST00000640087.1_1, ENST00000648527.1_2]	chr17:43340485-43394511	-	-	17	54026	5783	0	5783	1	ENST00000344686.8_3, ENST00000376926.8_2, ENST00000586644.2_2, ENST00000592267.1_1, ENST00000617331.2_4	MAP3K14	protein_coding, retained_intron		3.44	4.3	3.01	2.49	2.3	2.79	2.57	2.18	2.8	154.872	0.728998	3.23848	0.00120169	0.00987687	154.872	0.0281386	0.123274	0.90189	0.999983
ENSG00000006071.13_5	55	44	[ENST00000302539.9_2, ENST00000389817.7_2, ENST00000524561.1_1, ENST00000525022.1_1, ENST00000526002.1_1, ENST00000526037.5_1, ENST00000526168.5_1, ENST00000526921.5_1, ENST00000527905.5_1, ENST00000528202.5_1, ENST00000528374.1_1, ENST00000529967.5_1, ENST00000530147.5_1, ENST00000531137.1_1, ENST00000531642.5_1, ENST00000531891.1_1, ENST00000531911.1_1, ENST00000532220.1_1, ENST00000532728.6_2,…	chr11:17414044-17498426	-	-	37	84382	12588	1396	11192	0.889101	ENST00000302539.9_2, ENST00000389817.7_2, ENST00000524561.1_1, ENST00000525022.1_1, ENST00000526002.1_1, ENST00000526037.5_1, ENST00000526168.5_1, ENST00000526921.5_1, ENST00000527905.5_1, ENST00000528202.5_1, ENST00000528374.1_1, ENST00000529967.5_1, ENST00000530147.5_1, ENST00000531137.1_1, ENST00000531642.5_1, ENST00000531891.1_1, ENST00000531911.1_1, ENST00000532220.1_1, ENST00000532728.6_2, …	ABCC8	lncRNA, nonsense_mediated_decay, protein_coding, retained_intron	ABCC8	1.9	4.34	2.23	2.24	4.54	2.1	3.17	3.96	5.3	84.1963	-0.375285	-1.01748	0.308928	0.50019	84.1963	-0.494629	-1.3439	0.178981	0.948857
ENSG00000006116.3_2	1	1	[ENST00000005284.3_1]	chr16:24266873-24374122	+	-	4	107249	3088	161	2927	0.947863	ENST00000005284.3_1	CACNG3	protein_coding	CACNG3	0.02	0.03	0.05	0.03	0	0.02	0	0	0.03	0.825861	1.94094	0.872023	0.383196	NA	0.825861	0.799452	0.342722	0.731808	NA
ENSG00000006118.14_6	14	14	[ENST00000005286.8_3, ENST00000453848.6_3, ENST00000534983.5_1, ENST00000535480.1_3, ENST00000536409.1_5, ENST00000536928.1_1, ENST00000537065.1_1, ENST00000537110.1_1, ENST00000538090.1_1, ENST00000540112.1_4, ENST00000540276.1_1, ENST00000543732.1_1, ENST00000544065.5_3, ENST00000544098.1_1]	chr11:60691934-60704631	+	-	9	12697	7271	839	6432	0.88461	ENST00000005286.8_3, ENST00000453848.6_3, ENST00000534983.5_1, ENST00000535480.1_3, ENST00000536409.1_5, ENST00000536928.1_1, ENST00000537065.1_1, ENST00000537110.1_1, ENST00000538090.1_1, ENST00000540112.1_4, ENST00000540276.1_1, ENST00000543732.1_1, ENST00000544065.5_3, ENST00000544098.1_1	TMEM132A	lncRNA, protein_coding, retained_intron	TMEM132A	45.4	34.26	44.02	25.73	24.05	24.42	22.96	29.54	27.94	546.831	0.857224	4.96274	6.95049e-07	2.42919e-05	546.831	-0.0843601	-0.483701	0.628598	0.999983
ENSG00000006125.18_6	22	17	[ENST00000587805.1_1, ENST00000588093.1_1, ENST00000588116.1_1, ENST00000589774.5_1, ENST00000590432.5_2, ENST00000590538.5_1, ENST00000591561.5_1, ENST00000591610.5_1, ENST00000592167.5_1, ENST00000593014.3_1, ENST00000610402.5_3, ENST00000612035.4_2, ENST00000612116.5_2, ENST00000614600.4_2, ENST00000616681.4_1, ENST00000616784.4_3, ENST00000618940.4_2, ENST00000619183.1_1, ENST00000620039.4_1,…	chr17:33905064-34053432	+	-	30	148368	7591	165	7426	0.978264	ENST00000587805.1_1, ENST00000588093.1_1, ENST00000588116.1_1, ENST00000589774.5_1, ENST00000590432.5_3, ENST00000590538.5_1, ENST00000591561.5_1, ENST00000591610.5_1, ENST00000592167.5_1, ENST00000593014.3_1, ENST00000610402.5_3, ENST00000612035.4_3, ENST00000612116.5_2, ENST00000614600.4_3, ENST00000616681.4_1, ENST00000616784.4_3, ENST00000618940.4_2, ENST00000619183.1_1, ENST00000620039.4_1, …	AP2B1	lncRNA, nonsense_mediated_decay, protein_coding	AP2B1	29.01	34.66	32.38	41.51	40.79	41.63	41.75	40.99	41.33	2750.84	-0.147278	-1.31028	0.190101	0.363465	2750.84	0.0254461	0.226948	0.820464	0.999983
ENSG00000006128.12_5	5	4	[ENST00000319273.10_5, ENST00000346867.4_4, ENST00000350485.8_1, ENST00000491437.1_1, ENST00000495916.1_1]	chr7:97361395-97369784	+	-	7	8389	1712	0	1712	1	ENST00000319273.10_5, ENST00000346867.4_4, ENST00000350485.8_1, ENST00000491437.1_1, ENST00000495916.1_1	TAC1	protein_coding, retained_intron	TAC1	0.08	0	0	0	0	0.08	0	0	0	0.18143	0.890711	0.218284	0.827208	NA	0.18143	0.708876	0.173725	0.862082	NA
ENSG00000006194.10_4	8	8	[ENST00000219069.6_2, ENST00000538765.2_1, ENST00000572748.1_3, ENST00000573578.1_1, ENST00000574253.1_1, ENST00000574674.1_1, ENST00000575332.1_1, ENST00000575823.1_3]	chr16:3313799-3351401	+	-	8	37602	6403	470	5933	0.926597	ENST00000219069.6_2, ENST00000538765.2_1, ENST00000572123.4_1, ENST00000572748.1_3, ENST00000573578.1_1, ENST00000573951.1_1, ENST00000574253.1_1, ENST00000574674.1_1, ENST00000575332.1_1, ENST00000575823.1_3	LINC00921, ZNF263	lncRNA, protein_coding	ZNF263	3.14	3.77	3.06	3.22	3.74	3.86	3.3	4.93	2.94	108.344	0.0760779	0.348622	0.727373	0.840327	108.344	-0.00386993	-0.0177401	0.985846	0.999983
ENSG00000006210.7_4	4	4	[ENST00000006053.7_4, ENST00000563383.1_3, ENST00000564948.1_1, ENST00000565912.1_1]	chr16:57406388-57418956	+	-	3	12568	5960	1104	4856	0.814765	ENST00000006053.7_4, ENST00000563383.1_3, ENST00000564948.1_1, ENST00000565912.1_1	CX3CL1	protein_coding	CX3CL1	0	0.2	0	0	0	0	0	0	0
ENSG00000006282.21_5	28	26	[ENST00000006658.11_4, ENST00000356488.8_3, ENST00000502911.5_1, ENST00000503063.5_1, ENST00000503127.5_1, ENST00000504265.5_1, ENST00000504271.1_1, ENST00000504334.5_1, ENST00000505085.5_1, ENST00000505336.1_1, ENST00000505456.6_1, ENST00000505559.5_1, ENST00000505656.5_1, ENST00000508528.1_1, ENST00000508598.5_1, ENST00000510917.5_1, ENST00000511347.5_1, ENST00000511605.1_1, ENST00000511845.5_1…	chr17:48620418-48633213	+	-	11	12795	5337	658	4679	0.87671	ENST00000006658.11_4, ENST00000268933.8_3, ENST00000356488.8_3, ENST00000502911.5_1, ENST00000503063.5_1, ENST00000503127.5_1, ENST00000504265.5_1, ENST00000504271.1_1, ENST00000504334.5_1, ENST00000505085.5_1, ENST00000505336.1_1, ENST00000505456.6_1, ENST00000505559.5_1, ENST00000505656.5_1, ENST00000508528.1_1, ENST00000508598.5_1, ENST00000510917.5_1, ENST00000511347.5_1, ENST00000511605.1_1,…	EPN3, SPATA20	nonsense_mediated_decay, protein_coding, retained_intron	EPN3, SPATA20	38.95	35.24	35.18	35.19	32.69	41.23	33.34	40.79	36.27	914.015	0.222774	1.5412	0.123268	0.274145	914.015	0.0165772	0.114605	0.908759	0.999983
ENSG00000006283.18_4	34	8	[ENST00000352832.9_1, ENST00000354983.8_1, ENST00000358244.9_1, ENST00000359106.10_2, ENST00000360761.8_1, ENST00000416767.8_1, ENST00000429973.6_1, ENST00000442258.6_1, ENST00000502264.5_1, ENST00000503436.5_1, ENST00000503485.5_2, ENST00000503607.5_1, ENST00000504076.5_1, ENST00000505165.5_1, ENST00000506406.5_1, ENST00000506520.1_2, ENST00000507336.5_1, ENST00000507510.6_1, ENST00000507609.5_1…	chr17:48638075-48704835	+	-	39	66760	10062	1040	9022	0.896641	ENST00000352832.9_1, ENST00000354983.8_1, ENST00000358244.9_1, ENST00000359106.10_2, ENST00000360761.8_1, ENST00000416767.8_1, ENST00000429973.6_1, ENST00000442258.6_1, ENST00000502264.5_1, ENST00000503436.5_1, ENST00000503485.5_2, ENST00000503607.5_1, ENST00000504076.5_1, ENST00000505165.5_1, ENST00000506406.5_1, ENST00000506520.1_3, ENST00000507336.5_1, ENST00000507510.6_1, ENST00000507609.5_1,…	CACNA1G	nonsense_mediated_decay, protein_coding	CACNA1G	0.01	0.14	0.06	0	0.01	0.04	0.14	0.02	0.03	2.94687	0.759894	0.529278	0.596613	NA	2.94687	-1.29153	-0.853924	0.393147	NA
ENSG00000006327.13_2	7	7	[ENST00000326577.8_1, ENST00000341627.5_1, ENST00000571351.1_1, ENST00000573001.5_1, ENST00000574699.1_1, ENST00000575124.1_1, ENST00000575836.1_1]	chr16:3068445-3072384	+	-	4	3939	1848	60	1788	0.967532	ENST00000326577.8_1, ENST00000341627.5_1, ENST00000571351.1_1, ENST00000573001.5_1, ENST00000574699.1_1, ENST00000575124.1_1, ENST00000575836.1_1	TNFRSF12A	nonsense_mediated_decay, protein_coding, retained_intron	TNFRSF12A	195.95	212.07	201.28	140.62	149.1	157.42	148.59	173.53	180.78	1251.94	0.501645	3.85004	0.0001181	0.00168573	1251.94	-0.144762	-1.10515	0.269093	0.999983
ENSG00000006377.11_3	3	3	[ENST00000493273.2_1, ENST00000518156.3_2, ENST00000555308.1_1]	chr7:96634864-96640352	+	-	3	5488	3445	0	3445	1	ENST00000493273.2_1, ENST00000518156.3_2, ENST00000555308.1_1	DLX6	lncRNA, protein_coding	DLX6	0	0	0	0	0	0	0	0	0
ENSG00000006432.15_3	7	7	[ENST00000381250.8_1, ENST00000553414.5_1, ENST00000554024.1_1, ENST00000554146.1_1, ENST00000554752.6_1, ENST00000555993.6_1, ENST00000611979.4_1]	chr14:71189242-71276251	-	-	16	87009	12386	1209	11177	0.90239	ENST00000381250.8_1, ENST00000553414.5_1, ENST00000554024.1_1, ENST00000554146.1_1, ENST00000554752.6_1, ENST00000555993.6_1, ENST00000611979.4_1	MAP3K9	protein_coding, retained_intron	MAP3K9	4.02	4.42	4.45	4.48	3.75	4.01	3.94	4.13	5.08	573.751	0.189202	1.07595	0.28195	0.471436	573.751	-0.0808124	-0.458967	0.646258	0.999983
ENSG00000006451.8_4	5	5	[ENST00000005257.7_2, ENST00000434466.1_3, ENST00000436179.1_3, ENST00000466491.1_1, ENST00000468201.1_1]	chr7:39663163-39747719	+	-	8	84556	3579	0	3579	1	ENST00000005257.7_2, ENST00000434466.1_3, ENST00000436179.1_3, ENST00000466491.1_1, ENST00000468201.1_1	RALA	lncRNA, nonsense_mediated_decay, protein_coding	RALA	5.75	3.88	5.33	2.71	5.92	4.11	4.72	6.28	4.21	134.423	0.223463	0.831245	0.405836	0.593934	134.423	-0.230379	-0.861049	0.389211	0.999983
ENSG00000006453.14_4	5	5	[ENST00000005260.9_2, ENST00000462558.5_1, ENST00000473569.1_1, ENST00000479789.1_1, ENST00000480580.1_1]	chr7:97920961-98030402	-	-	16	109441	4821	348	4473	0.927816	ENST00000005260.9_2, ENST00000462558.5_1, ENST00000473569.1_1, ENST00000479789.1_1, ENST00000480580.1_1	BAIAP2L1	lncRNA, protein_coding, retained_intron	BAIAP2L1	60.05	53.95	49.88	33.58	39.96	42.08	37.36	35.14	31.87	1452.77	0.886976	6.59497	4.25334e-11	5.86872e-09	1452.77	0.174803	1.29432	0.195556	0.95906
ENSG00000006459.11_3	3	3	[ENST00000397560.7_2, ENST00000472616.1_1, ENST00000478996.1_1]	chr7:139784545-139876783	-	-	21	92238	9378	314	9064	0.966517	ENST00000397560.7_2, ENST00000472616.1_1, ENST00000478996.1_1	KDM7A	nonsense_mediated_decay, protein_coding, retained_intron	JHDM1D	0.48	0.91	0.48	1.09	0.87	0.53	0.69	1.22	0.7	81.701	-0.249745	-0.718866	0.472223	0.651163	81.701	-0.00815401	-0.0237882	0.981022	0.999983
ENSG00000006468.14_5	23	19	[ENST00000242066.9_1, ENST00000399357.7_1, ENST00000403527.5_1, ENST00000403685.5_1, ENST00000405192.6_1, ENST00000405218.6_3, ENST00000405358.8_2, ENST00000420159.6_1, ENST00000421381.5_1, ENST00000430479.6_3, ENST00000431887.5_1, ENST00000433547.1_1, ENST00000438956.5_3, ENST00000443137.5_1, ENST00000443608.5_1, ENST00000460438.5_1, ENST00000472931.6_1, ENST00000476355.5_1, ENST00000476720.6_1,…	chr7:13930853-14031050	-	-	24	100197	9615	642	8973	0.933229	ENST00000242066.9_1, ENST00000399357.7_1, ENST00000403527.5_1, ENST00000403685.5_1, ENST00000405192.6_1, ENST00000405218.6_3, ENST00000405358.8_2, ENST00000420159.6_1, ENST00000421381.5_1, ENST00000430479.6_3, ENST00000431887.5_1, ENST00000433547.1_1, ENST00000438956.5_3, ENST00000443137.5_1, ENST00000443608.5_1, ENST00000460438.5_1, ENST00000472931.6_1, ENST00000476355.5_1, ENST00000476720.6_1, …	ETV1	lncRNA, nonsense_mediated_decay, protein_coding, retained_intron	ETV1	0	0	0	0.23	0	0.06	0	0.49	0.15	1.71411	-4.71863	-2.01495	0.0439104	NA	1.71411	-0.977839	-0.460543	0.645126	NA
ENSG00000006530.17_4	26	20	[ENST00000355413.8_1, ENST00000465241.5_1, ENST00000473247.5_1, ENST00000473884.5_1, ENST00000492693.5_1, ENST00000494053.1_1, ENST00000494688.1_1, ENST00000495028.5_1, ENST00000496273.1_1, ENST00000496784.1_1, ENST00000629555.2_1, ENST00000647568.1_1, ENST00000647898.1_1, ENST00000648068.1_2, ENST00000648395.1_1, ENST00000648489.1_1, ENST00000648690.1_1, ENST00000649014.1_1, ENST00000649286.2_2,…	chr7:141250988-141355044	+	-	25	104056	10786	3210	7576	0.702392	ENST00000465241.5_1, ENST00000473247.5_1, ENST00000473884.5_1, ENST00000492693.5_1, ENST00000494053.1_1, ENST00000494688.1_1, ENST00000495028.5_1, ENST00000496273.1_1, ENST00000496784.1_1, ENST00000629555.2_1, ENST00000647568.1_1, ENST00000647898.1_1, ENST00000648068.1_2, ENST00000648395.1_1, ENST00000648489.1_1, ENST00000648690.1_1, ENST00000649014.1_1, ENST00000649286.2_2, ENST00000649365.1_1, …	AGK	lncRNA, nonsense_mediated_decay, protein_coding, retained_intron	AGK	12.99	14.76	13.18	18.59	17.81	18.72	17.06	21.67	15.87	421.79	-0.177804	-1.34645	0.178158	0.34699	421.79	0.0552053	0.423883	0.671651	0.999983
ENSG00000006534.16_3	10	9	[ENST00000342456.11_2, ENST00000527514.1_1, ENST00000612297.4_1, ENST00000614849.4_1, ENST00000615368.4_1, ENST00000615463.4_1, ENST00000616697.1_2, ENST00000617288.4_1, ENST00000617449.4_2, ENST00000619675.4_1]	chr11:67776047-67796749	+	-	15	20702	6623	2338	4285	0.646988	ENST00000342456.11_2, ENST00000527514.1_1, ENST00000612297.4_1, ENST00000614849.4_1, ENST00000615368.4_1, ENST00000615463.4_1, ENST00000616697.1_3, ENST00000617288.4_1, ENST00000617449.4_3, ENST00000619675.4_1	ALDH3B1	nonsense_mediated_decay, protein_coding, retained_intron		3.69	2.54	4.35	2.43	2.62	2.31	2.35	2.86	2.19	90.9805	0.75587	2.94125	0.00326887	0.0209784	90.9805	0.0336494	0.129965	0.896594	0.999983
ENSG00000006555.11_5	5	5	[ENST00000371274.8_3, ENST00000371276.9_4, ENST00000448308.2_2, ENST00000474654.1_1, ENST00000488771.1_1]	chr1:55245384-55266996	-	-	6	21612	6111	1314	4797	0.784978	ENST00000371274.8_3, ENST00000371276.9_4, ENST00000448308.2_3, ENST00000474654.1_1, ENST00000488771.1_1	TTC22	protein_coding, retained_intron	TTC22	0	0.02	0.04	0	0	0	0	0.02	0	0.280544	1.00975	0.25216	0.800917	NA	0.280544	-0.693904	-0.170671	0.864482	NA
ENSG00000006576.16_2	12	11	[ENST00000248550.7_1, ENST00000275575.11_1, ENST00000307305.12_1, ENST00000415251.6_1, ENST00000416283.6_1, ENST00000422959.6_1, ENST00000424760.5_1, ENST00000450574.5_1, ENST00000454592.5_1, ENST00000468351.1_1, ENST00000470215.1_1, ENST00000479515.1_1]	chr7:77428108-77586820	+	-	21	158712	8646	592	8054	0.931529	ENST00000248550.7_1, ENST00000275575.11_1, ENST00000307305.12_1, ENST00000415251.6_1, ENST00000416283.6_1, ENST00000422959.6_1, ENST00000424760.5_1, ENST00000450574.5_1, ENST00000454592.5_1, ENST00000468351.1_1, ENST00000470215.1_1, ENST00000479515.1_1	PHTF2	lncRNA, protein_coding, retained_intron	PHTF2	9.98	10.35	8.53	13.93	20.36	14.11	13.02	22.07	8.52	451.067	-0.320314	-1.36141	0.173385	0.340935	451.067	0.214941	0.91868	0.358263	0.999983
ENSG00000006606.8_2	2	2	[ENST00000005180.8_1, ENST00000394905.2_1]	chr7:75398850-75419214	-	-	4	20364	706	71	635	0.899433	ENST00000005180.8_1, ENST00000394905.2_1	CCL26	protein_coding	CCL26	1.26	1.73	0.55	1.51	1.85	1.34	0.45	0.75	0.27	5.31854	1.47888	1.55341	0.120325	NA	5.31854	1.70066	1.81295	0.0698403	0.74967
ENSG00000006607.14_5	23	23	[ENST00000264042.8_2, ENST00000373287.8_1, ENST00000412332.1_3, ENST00000413432.2_3, ENST00000418082.1_1, ENST00000422951.1_1, ENST00000444371.1_3, ENST00000445489.1_1, ENST00000464142.5_1, ENST00000467260.1_1, ENST00000470617.1_1, ENST00000471447.5_1, ENST00000473082.5_1, ENST00000473510.1_1, ENST00000476799.1_1, ENST00000478489.5_1, ENST00000479427.5_1, ENST00000485051.1_1, ENST00000486736.5_1,…	chr2:242295699-242434256	+	-	35	138557	14371	1681	12690	0.883028	ENST00000264042.8_2, ENST00000373287.8_1, ENST00000412332.1_3, ENST00000413432.2_3, ENST00000418082.1_1, ENST00000422951.1_1, ENST00000444371.1_3, ENST00000445489.1_1, ENST00000464142.5_1, ENST00000467260.1_1, ENST00000470617.1_1, ENST00000471447.5_1, ENST00000473082.5_1, ENST00000473510.1_1, ENST00000476799.1_1, ENST00000478489.5_1, ENST00000479427.5_1, ENST00000485051.1_1, ENST00000486736.5_1, …	FARP2	lncRNA, protein_coding, retained_intron	FARP2	7.33	10.6	8.92	10.88	9.03	12.54	11.02	11.87	9.13	373.169	-0.0282183	-0.16371	0.86996	0.928864	373.169	0.058456	0.341142	0.732997	0.999983
ENSG00000006611.16_4	11	10	[ENST00000005226.12_3, ENST00000318024.8_2, ENST00000526181.1_1, ENST00000526313.5_1, ENST00000527020.5_1, ENST00000527551.1_1, ENST00000527720.5_1, ENST00000529563.5_1, ENST00000530700.1_1, ENST00000534556.1_1, ENST00000624811.1_1]	chr11:17515441-17565963	-	-	31	50522	4904	64	4840	0.986949	ENST00000005226.12_3, ENST00000318024.8_2, ENST00000526181.1_1, ENST00000526313.5_1, ENST00000527020.5_1, ENST00000527551.1_1, ENST00000527720.5_1, ENST00000529563.5_1, ENST00000530700.1_1, ENST00000534556.1_1, ENST00000624811.1_1	USH1C	TEC, lncRNA, nonsense_mediated_decay, protein_coding, retained_intron	USH1C	0.09	0.1	0	0	0	0	0.03	0	0	0.508766	2.21527	0.673873	0.500392	NA	0.508766	-0.631537	-0.185788	0.852611	NA
ENSG00000006625.18_4	8	6	[ENST00000005374.10_1, ENST00000275428.9_2, ENST00000409144.5_1, ENST00000409390.5_1, ENST00000409436.2_1, ENST00000426081.5_1, ENST00000440082.5_1, ENST00000447901.1_1]	chr7:30536236-30544457	-	-	5	8221	1594	0	1594	1	ENST00000005374.10_1, ENST00000275428.9_2, ENST00000409144.5_1, ENST00000409390.5_1, ENST00000409436.2_1, ENST00000426081.5_1, ENST00000440082.5_1, ENST00000447901.1_1, ENST00000598361.4_1	AC005154.5, GGCT	nonsense_mediated_decay, protein_coding	GGCT	28.31	36.81	38.4	41.35	64.82	54.65	48.53	70.02	35.41	530.509	-0.322537	-1.69562	0.0899581	0.222022	530.509	0.109923	0.582411	0.56029	0.999983
ENSG00000006634.8_3	8	8	[ENST00000265728.6_2, ENST00000413643.5_1, ENST00000430279.5_1, ENST00000431138.5_1, ENST00000486925.1_1, ENST00000495067.1_1, ENST00000498144.5_1, ENST00000498726.1_1]	chr7:87505530-87538868	+	-	12	33338	4595	278	4317	0.939499	ENST00000265728.6_2, ENST00000413643.5_1, ENST00000430279.5_1, ENST00000431138.5_1, ENST00000486925.1_1, ENST00000495067.1_1, ENST00000498144.5_1, ENST00000498726.1_1	DBF4	nonsense_mediated_decay, protein_coding, retained_intron	DBF4	9.55	14.76	14.81	26.41	31.61	25.24	29.22	35.54	20.69	511.703	-0.889761	-5.02569	5.0163e-07	1.85086e-05	511.703	0.00982326	0.0560964	0.955265	0.999983
ENSG00000006638.11_2	4	4	[ENST00000375190.8_1, ENST00000411851.3_1, ENST00000587717.1_1, ENST00000589966.1_1]	chr19:3594503-3606838	-	-	4	12335	2793	614	2179	0.780165	ENST00000375190.8_1, ENST00000411851.3_1, ENST00000587717.1_1, ENST00000589966.1_1	TBXA2R	lncRNA, protein_coding	TBXA2R	1.48	1.43	0.97	1.36	0.7	0.46	0.38	1.7	1.07	25.2274	0.577016	1.04071	0.29801	0.488605	25.2274	-0.23182	-0.410335	0.68156	0.999983
ENSG00000006652.14_5	17	15	[ENST00000005558.8_2, ENST00000403825.8_3, ENST00000417662.1_1, ENST00000421296.1_2, ENST00000429071.5_1, ENST00000432734.1_1, ENST00000440625.5_1, ENST00000443101.6_1, ENST00000445335.1_1, ENST00000462155.2_1, ENST00000466459.5_2, ENST00000470441.1_1, ENST00000476927.5_1, ENST00000486688.1_1, ENST00000489994.5_1, ENST00000535603.5_2, ENST00000621379.4_2]	chr7:112063022-112121072	+	-	19	58050	7462	1324	6138	0.822568	ENST00000005558.8_2, ENST00000403825.8_4, ENST00000417662.1_2, ENST00000421296.1_2, ENST00000429071.5_1, ENST00000432734.1_2, ENST00000439068.6_1, ENST00000440625.5_2, ENST00000443101.6_2, ENST00000445335.1_2, ENST00000455302.5_1, ENST00000462155.2_1, ENST00000466459.5_3, ENST00000470441.1_1, ENST00000476927.5_2, ENST00000486688.1_1, ENST00000489994.5_1, ENST00000535603.5_2, ENST00000621379.4_2	IFRD1, LSMEM1	lncRNA, nonsense_mediated_decay, protein_coding, retained_intron	C7orf53, IFRD1	47.21	51.09	56.27	55.91	54.34	42.51	48.05	51.3	40.8	539.423	0.375549	2.55463	0.0106299	0.0494213	539.423	0.160222	1.09557	0.273266	0.999983
ENSG00000006659.13_3	3	2	[ENST00000360675.7_1, ENST00000392052.8_2, ENST00000601802.1_1]	chr19:40195120-40200084	+	-	5	4964	904	155	749	0.82854	ENST00000360675.7_1, ENST00000392052.8_2, ENST00000601802.1_1	LGALS14	protein_coding	LGALS14	0	0	0	0	0	0	0	0	0
ENSG00000006695.11_3	4	3	[ENST00000261643.8_2, ENST00000429152.6_1, ENST00000580561.1_1, ENST00000581931.5_1]	chr17:13972812-14111994	+	-	7	139182	3172	0	3172	1	ENST00000261643.8_2, ENST00000429152.6_1, ENST00000580561.1_1, ENST00000581931.5_1, ENST00000664217.1_1, ENST00000670279.1_1	COX10	nonsense_mediated_decay, protein_coding	COX10	8.78	10.18	9.1	11.58	11.65	12.17	10.77	12.52	11.23	374.458	-0.0674449	-0.504734	0.613746	0.761834	374.458	0.0704076	0.532811	0.594164	0.999983
ENSG00000006704.10_4	7	7	[ENST00000265755.7_1, ENST00000424337.6_2, ENST00000455841.6_1, ENST00000470715.1_1, ENST00000476977.5_2, ENST00000486086.1_1, ENST00000489094.1_1]	chr7:73868119-74016930	+	-	28	148811	6497	1417	5080	0.781899	ENST00000265755.7_1, ENST00000424337.6_2, ENST00000455841.6_1, ENST00000470715.1_1, ENST00000476977.5_2, ENST00000486086.1_1, ENST00000489094.1_1	GTF2IRD1	lncRNA, protein_coding, retained_intron	GTF2IRD1	15.14	19.22	20.59	15.54	20.39	17.04	22.73	27.55	16.81	523.787	-0.0455152	-0.301202	0.763261	0.864633	523.787	-0.297443	-1.96355	0.049582	0.67581
ENSG00000006712.15_4	8	6	[ENST00000221265.8_2, ENST00000416728.3_1, ENST00000595379.1_2, ENST00000595564.5_1, ENST00000595797.5_1, ENST00000597365.1_1, ENST00000598127.1_1, ENST00000598594.1_1]	chr19:39876268-39881794	-	-	11	5526	2850	178	2672	0.937544	ENST00000221265.8_2, ENST00000416728.3_1, ENST00000595379.1_2, ENST00000595564.5_1, ENST00000595797.5_1, ENST00000597365.1_1, ENST00000598127.1_1, ENST00000598594.1_1	PAF1	nonsense_mediated_decay, protein_coding, retained_intron	PAF1	28.11	29.22	21.75	31.17	28.82	27.91	32.42	33.19	32.03	632.032	-0.0738771	-0.468261	0.639598	0.78006	632.032	-0.120473	-0.765985	0.443685	0.999983
ENSG00000006715.16_4	14	12	[ENST00000265745.13_1, ENST00000310301.9_2, ENST00000395969.6_1, ENST00000413141.5_3, ENST00000414632.5_1, ENST00000418457.6_3, ENST00000439468.1_3, ENST00000448833.5_1, ENST00000457055.1_3, ENST00000462429.1_1, ENST00000466017.1_1, ENST00000482217.1_1, ENST00000485955.1_1, ENST00000490924.1_1]	chr7:38762573-38971994	-	-	37	209421	7752	1144	6608	0.852425	ENST00000265745.13_1, ENST00000310301.9_2, ENST00000395969.6_1, ENST00000413141.5_3, ENST00000414632.5_1, ENST00000418457.6_3, ENST00000439468.1_3, ENST00000448833.5_1, ENST00000457055.1_3, ENST00000462429.1_1, ENST00000466017.1_1, ENST00000482217.1_1, ENST00000485955.1_1, ENST00000490924.1_1	VPS41	lncRNA, nonsense_mediated_decay, protein_coding, retained_intron	VPS41	8.38	12.68	7.07	14.58	17.01	17.66	14.06	17.24	16.41	188.014	-0.545216	-2.52146	0.0116868	0.0527441	188.014	0.0783813	0.374302	0.70818	0.999983
ENSG00000006740.17_3	12	11	[ENST00000262444.13_2, ENST00000340825.7_2, ENST00000379672.10_3, ENST00000538915.2_1, ENST00000544416.6_1, ENST00000578087.1_1, ENST00000578442.1_1, ENST00000580768.5_1, ENST00000581437.1_1, ENST00000583608.1_1, ENST00000584974.1_1, ENST00000616670.4_1]	chr17:12692814-12894960	+	-	24	202146	9322	452	8870	0.951513	ENST00000262444.13_2, ENST00000340825.7_2, ENST00000379672.10_3, ENST00000538915.2_1, ENST00000544416.6_1, ENST00000578087.1_1, ENST00000578442.1_1, ENST00000580768.5_1, ENST00000581437.1_1, ENST00000583608.1_1, ENST00000584974.1_1, ENST00000616670.4_1	ARHGAP44	lncRNA, nonsense_mediated_decay, protein_coding, retained_intron	ARHGAP44	1.55	2.56	1.64	3.36	3.32	1.85	2.81	2.14	3.77	80.5755	-0.394744	-1.13345	0.257024	0.443994	80.5755	-0.0214599	-0.0620363	0.950534	0.999983
ENSG00000006744.19_5	21	21	[ENST00000338034.9_4, ENST00000395962.6_1, ENST00000426905.7_3, ENST00000446899.5_1, ENST00000465825.5_1, ENST00000476042.1_2, ENST00000480891.5_1, ENST00000484122.5_1, ENST00000487229.6_1, ENST00000491478.5_1, ENST00000492559.5_1, ENST00000578071.1_1, ENST00000578104.1_1, ENST00000578991.5_1, ENST00000580504.5_1, ENST00000581499.6_1, ENST00000583371.5_1, ENST00000584650.5_1, ENST00000609101.5_2,…	chr17:12894928-12921382	-	-	21	26454	7002	1149	5853	0.835904	ENST00000338034.9_4, ENST00000395962.6_1, ENST00000426905.7_3, ENST00000446899.5_1, ENST00000465825.5_1, ENST00000476042.1_2, ENST00000480891.5_1, ENST00000484122.5_1, ENST00000487229.6_1, ENST00000491478.5_1, ENST00000492559.5_1, ENST00000578071.1_1, ENST00000578104.1_1, ENST00000578991.5_1, ENST00000580504.5_1, ENST00000581499.6_1, ENST00000583371.5_1, ENST00000584650.5_1, ENST00000609101.5_2, …	ELAC2	lncRNA, nonsense_mediated_decay, protein_coding, retained_intron	ELAC2	53.12	55.76	56.12	63.79	52.39	67.47	66.43	64.54	57.98	776.169	0.035787	0.251353	0.801541	0.889065	776.169	-0.00612742	-0.0431437	0.965587	0.999983
ENSG00000006747.15_3	10	10	[ENST00000297029.10_3, ENST00000341757.9_1, ENST00000417018.1_1, ENST00000436854.1_1, ENST00000473722.5_1, ENST00000476649.1_1, ENST00000486980.5_1, ENST00000518849.1_2, ENST00000519209.5_1, ENST00000523729.5_1]	chr7:12610202-12699807	+	-	23	89605	11626	3671	7955	0.684242	ENST00000297029.10_3, ENST00000341757.9_1, ENST00000417018.1_1, ENST00000436854.1_1, ENST00000437088.1_1, ENST00000473722.5_1, ENST00000476649.1_1, ENST00000486980.5_1, ENST00000518849.1_3, ENST00000519209.5_1, ENST00000523729.5_1	AC011891.1, SCIN	lncRNA, nonsense_mediated_decay, protein_coding, retained_intron	SCIN	17.97	23.67	18.55	19.03	25.86	28.17	22.87	34.23	20.38	845.876	-0.118233	-0.705391	0.480567	0.658146	845.876	-0.0407998	-0.243865	0.807335	0.999983
ENSG00000006756.16_3	7	6	[ENST00000217890.10_1, ENST00000381154.6_2, ENST00000458014.1_1, ENST00000481340.1_1, ENST00000494870.5_1, ENST00000495294.1_1, ENST00000559324.1_1]	chrX:2822012-2847390	-	-	12	25378	7026	1933	5093	0.724879	ENST00000217890.10_1, ENST00000381154.6_2, ENST00000458014.1_1, ENST00000481340.1_1, ENST00000494870.5_1, ENST00000495294.1_1, ENST00000559324.1_1	ARSD	lncRNA, nonsense_mediated_decay, protein_coding, retained_intron	ARSD	7.42	8.79	8.69	9.41	11.46	9.53	7.5	11.38	10.15	319.791	0.0127013	0.0742905	0.940779	0.966462	319.791	0.10127	0.599069	0.549127	0.999983
ENSG00000006757.12_3	4	2	[ENST00000381042.9_2, ENST00000442940.1_2, ENST00000444736.5_1, ENST00000537427.5_1]	chrX:7866287-7895780	-	-	8	29493	3411	470	2941	0.86221	ENST00000381042.9_2, ENST00000442940.1_3, ENST00000444736.5_1, ENST00000537427.5_1	PNPLA4	protein_coding	PNPLA4	3.25	2.89	4.23	3.82	6.67	5.09	7.76	5.04	1.55	71.6082	-0.187057	-0.440923	0.659269	0.793889	71.6082	0.189385	0.450488	0.652359	0.999983
ENSG00000006788.14_4	3	3	[ENST00000252172.9_2, ENST00000418404.8_3, ENST00000621918.1_1]	chr17:10204181-10276447	-	-	41	72266	6120	0	6120	1	ENST00000252172.9_2, ENST00000418404.8_3, ENST00000621918.1_1	MYH13	protein_coding	MYH13	0	0	0	0	0	0	0	0	0
ENSG00000006831.10_3	7	7	[ENST00000357103.5_2, ENST00000535774.1_1, ENST00000537190.1_1, ENST00000537545.1_1, ENST00000540974.1_2, ENST00000543456.1_1, ENST00000544470.1_1]	chr12:1797739-1897840	+	-	12	100101	5831	469	5362	0.919568	ENST00000357103.5_2, ENST00000535774.1_1, ENST00000537190.1_1, ENST00000537545.1_1, ENST00000540974.1_2, ENST00000543456.1_1, ENST00000544470.1_1	ADIPOR2	lncRNA, protein_coding	ADIPOR2	14.66	19.13	15.93	14.01	19.65	16.65	18.2	28.14	22.68	814.8	-0.240447	-1.52148	0.128139	0.280042	814.8	-0.424696	-2.69584	0.00702109	0.282331
ENSG00000006837.12_5	10	10	[ENST00000265334.9_3, ENST00000518990.5_1, ENST00000519312.5_1, ENST00000520592.1_1, ENST00000520693.5_1, ENST00000521118.5_1, ENST00000521755.1_1, ENST00000522501.1_1, ENST00000523054.5_1, ENST00000523832.1_2]	chr5:133622040-133706738	-	-	18	84698	3149	295	2854	0.906319	ENST00000265334.9_3, ENST00000518409.1_1, ENST00000518990.5_1, ENST00000519312.5_1, ENST00000520515.5_1, ENST00000520592.1_1, ENST00000520693.5_1, ENST00000521118.5_1, ENST00000521755.1_1, ENST00000522501.1_1, ENST00000523054.5_1, ENST00000523832.1_2	AC104109.4, CDKL3	lncRNA, nonsense_mediated_decay, protein_coding, retained_intron	CDKL3	0.31	0.57	0.53	0.38	0.61	0.63	0.12	0.8	0.43	5.06133	0.372231	0.391191	0.695656	NA	5.06133	0.449722	0.513788	0.6074	0.999983
ENSG00000007001.12_3	4	4	[ENST00000005756.4_1, ENST00000460456.1_1, ENST00000489438.1_1, ENST00000605860.5_1]	chr2:158733213-158992666	+	-	11	259453	2957	86	2871	0.970916	ENST00000005756.4_1, ENST00000460456.1_1, ENST00000489438.1_1, ENST00000605860.5_1	UPP2	lncRNA, protein_coding	UPP2	0	0	0	0	0	0	0	0	0
ENSG00000007038.11_3	10	10	[ENST00000005995.8_2, ENST00000450020.7_1, ENST00000570594.5_1, ENST00000570629.5_1, ENST00000571141.1_1, ENST00000574265.1_1, ENST00000574813.5_1, ENST00000575199.1_1, ENST00000575739.1_1, ENST00000577043.1_1]	chr16:2867180-2876305	+	-	6	9125	1967	263	1704	0.866294	ENST00000005995.8_2, ENST00000450020.7_1, ENST00000570594.5_1, ENST00000570629.5_1, ENST00000571141.1_1, ENST00000574265.1_1, ENST00000574813.5_1, ENST00000575199.1_1, ENST00000575739.1_1, ENST00000577043.1_1	PRSS21	lncRNA, nonsense_mediated_decay, protein_coding, retained_intron	PRSS21	0	0	0	0	0	0	0	0	0
ENSG00000007047.15_4	11	10	[ENST00000262891.9_2, ENST00000300843.8_2, ENST00000587566.5_2, ENST00000588533.5_1, ENST00000588621.5_1, ENST00000590897.1_1, ENST00000590909.1_1, ENST00000592207.5_2, ENST00000592762.5_1, ENST00000620044.4_1, ENST00000622871.1_1]	chr19:45582545-45808542	+	-	19	225997	6656	1770	4886	0.734075	ENST00000262891.9_2, ENST00000270257.8_1, ENST00000300843.8_2, ENST00000391951.2_1, ENST00000587566.5_3, ENST00000588533.5_1, ENST00000588621.5_1, ENST00000590897.1_1, ENST00000590909.1_1, ENST00000592207.5_2, ENST00000592351.1_1, ENST00000592762.5_1, ENST00000620044.4_1, ENST00000622871.1_1	GEMIN7, MARK4	lncRNA, nonsense_mediated_decay, protein_coding, retained_intron	GEMIN7, MARK4	5.13	5.14	7.73	3.55	6.05	7.75	6.4	7.27	6.11	163.396	0.0942204	0.367882	0.712961	0.831668	163.396	-0.17147	-0.665188	0.50593	0.999983
ENSG00000007062.11_4	20	16	[ENST00000447510.6_1, ENST00000502501.1_1, ENST00000502943.1_1, ENST00000503884.5_4, ENST00000504842.5_1, ENST00000505450.5_1, ENST00000508167.5_1, ENST00000508322.1_4, ENST00000508940.1_4, ENST00000510224.5_1, ENST00000511153.5_3, ENST00000511270.1_1, ENST00000512304.2_1, ENST00000513108.1_1, ENST00000513448.5_1, ENST00000513946.1_1, ENST00000514693.5_1, ENST00000514967.5_4, ENST00000539194.5_1,…	chr4:15964698-16086001	-	-	43	121303	7434	516	6918	0.930589	ENST00000259989.7_2, ENST00000447510.6_1, ENST00000502501.1_1, ENST00000502943.1_1, ENST00000503884.5_5, ENST00000504842.5_1, ENST00000505450.5_1, ENST00000508167.5_1, ENST00000508322.1_5, ENST00000508940.1_5, ENST00000509331.1_1, ENST00000510224.5_1, ENST00000511153.5_3, ENST00000511270.1_1, ENST00000512304.2_1, ENST00000513108.1_1, ENST00000513448.5_1, ENST00000513946.1_1, ENST00000514693.5_1, …	FGFBP2, PROM1	lncRNA, nonsense_mediated_decay, protein_coding, retained_intron	FGFBP2, PROM1	0	0	0	0	0	0.09	0.1	0	0	0.411127	-1.75364	-0.433795	0.664437	NA	0.411127	-0.192818	-0.0481112	0.961628	NA
ENSG00000007080.11_3	4	4	[ENST00000445755.7_2, ENST00000596123.1_1, ENST00000597436.5_1, ENST00000602080.1_1]	chr19:18043823-18054800	+	-	6	10977	1661	466	1195	0.719446	ENST00000445755.7_2, ENST00000596123.1_1, ENST00000597436.5_1, ENST00000602080.1_1	CCDC124	protein_coding, retained_intron	CCDC124	19	16.66	19.64	17.2	19.88	19.25	17.86	24.1	17.54	205.886	0.13786	0.816841	0.414019	0.601459	205.886	-0.0420436	-0.24899	0.803368	0.999983
ENSG00000007129.18_4	7	6	[ENST00000187608.13_1, ENST00000401445.4_2, ENST00000407170.6_1, ENST00000457737.5_1, ENST00000482870.6_1, ENST00000618577.4_1, ENST00000632983.1_1]	chr19:42055885-42093197	+	-	11	37312	1977	262	1715	0.867476	ENST00000187608.13_1, ENST00000401445.4_2, ENST00000407170.6_1, ENST00000457737.5_1, ENST00000482870.6_1, ENST00000618577.4_1, ENST00000632983.1_2	CEACAM21	lncRNA, nonsense_mediated_decay, protein_coding	CEACAM21	0.06	0	0	0	0.12	0.12	0	0	0	0.469918	0.972508	0.279832	0.779606	NA	0.469918	2.48029	0.738962	0.45993	NA
ENSG00000007168.13_4	13	13	[ENST00000397193.7_1, ENST00000397195.10_2, ENST00000570400.1_1, ENST00000571289.1_1, ENST00000571495.1_1, ENST00000572915.6_1, ENST00000574213.1_1, ENST00000574468.1_3, ENST00000574816.5_1, ENST00000575477.5_1, ENST00000576586.5_1, ENST00000609078.1_1, ENST00000610190.1_1]	chr17:2496503-2588909	+	-	17	92406	8219	1245	6974	0.848522	ENST00000397193.7_1, ENST00000397195.10_2, ENST00000492377.2, ENST00000570400.1_1, ENST00000571289.1_1, ENST00000571495.1_1, ENST00000572915.6_1, ENST00000574213.1_1, ENST00000574468.1_3, ENST00000574816.5_1, ENST00000575477.5_1, ENST00000576586.5_1, ENST00000609078.1_1, ENST00000610190.1_1	PAFAH1B1, RN7SL608P	lncRNA, misc_RNA, nonsense_mediated_decay, protein_coding, retained_intron	PAFAH1B1	13.81	17.74	18.35	23.13	35.7	27.74	33.59	35.46	17.7	715.358	-0.546346	-2.74595	0.00603368	0.0326739	715.358	0.0445231	0.225533	0.821565	0.999983
ENSG00000007171.17_5	3	3	[ENST00000313735.10_2, ENST00000621962.1_3, ENST00000646938.1_1]	chr17:26083791-26127525	-	-	28	43734	4369	0	4369	1	ENST00000313735.10_2, ENST00000582441.1_1, ENST00000621962.1_3, ENST00000646938.1_1	AC005697.1, NOS2	protein_coding	NOS2, LYRM9	0	0	0.02	0	0	0	0	0	0
ENSG00000007174.18_5	15	14	[ENST00000262442.9_3, ENST00000396001.6_1, ENST00000454412.6_2, ENST00000578834.1_1, ENST00000579406.1_1, ENST00000579602.1_2, ENST00000579703.1_2, ENST00000579813.1_2, ENST00000579828.5_1, ENST00000580255.1_1, ENST00000581682.1_1, ENST00000583192.1_1, ENST00000584663.1_1, ENST00000585197.1_1, ENST00000608377.5_1]	chr17:11501786-11873065	+	-	76	371279	16941	470	16471	0.972257	ENST00000262442.9_3, ENST00000396001.6_1, ENST00000454412.6_2, ENST00000578834.1_1, ENST00000579406.1_1, ENST00000579602.1_2, ENST00000579703.1_2, ENST00000579813.1_2, ENST00000579828.5_1, ENST00000580255.1_1, ENST00000581682.1_1, ENST00000583192.1_1, ENST00000584663.1_1, ENST00000585197.1_1, ENST00000608377.5_1	DNAH9	lncRNA, protein_coding, retained_intron	DNAH9	0	0	0	0	0	0.08	0	0	0	0.293787	0	0	1	NA	0.293787	2.26481	0.564357	0.572511	NA
ENSG00000007202.15_4	16	15	[ENST00000389003.7_1, ENST00000528896.7_2, ENST00000544884.5_2, ENST00000577261.1_3, ENST00000577417.5_1, ENST00000577580.1_1, ENST00000579253.1_1, ENST00000579924.6_1, ENST00000580395.1_1, ENST00000580882.5_1, ENST00000581064.1_1, ENST00000581267.1_2, ENST00000582417.1_1, ENST00000582901.1_1, ENST00000583403.5_1, ENST00000583860.1_1]	chr17:26941463-26972472	-	-	36	31009	9232	233	8999	0.974762	ENST00000389003.7_1, ENST00000528896.7_2, ENST00000544884.5_2, ENST00000577261.1_4, ENST00000577417.5_1, ENST00000577580.1_1, ENST00000579253.1_1, ENST00000579924.6_1, ENST00000580395.1_1, ENST00000580882.5_1, ENST00000581064.1_1, ENST00000581267.1_3, ENST00000582417.1_1, ENST00000582901.1_1, ENST00000583403.5_1, ENST00000583860.1_1	KIAA0100	lncRNA, nonsense_mediated_decay, protein_coding, retained_intron	KIAA0100	31.51	36.72	33.37	50.14	50.63	44.25	51.02	51.22	38.16	2039.4	-0.229565	-1.9899	0.0466016	0.14215	2039.4	0.0875135	0.759705	0.447431	0.999983
ENSG00000007216.14_4	7	4	[ENST00000314669.9_3, ENST00000444914.7_3, ENST00000459818.2_2, ENST00000541739.6_1, ENST00000545060.2_1, ENST00000577903.5_1, ENST00000579281.5_2]	chr17:26800310-26824799	+	-	12	24489	3226	109	3117	0.966212	ENST00000314669.9_3, ENST00000444914.7_3, ENST00000459818.2_3, ENST00000541739.6_1, ENST00000545060.2_1, ENST00000577903.5_1, ENST00000579281.5_3	SLC13A2	nonsense_mediated_decay, protein_coding, retained_intron	SLC13A2	0.03	0	0	0	0.03	0	0	0	0	0.207899	1.00418	0.24609	0.805612	NA	0.207899	0.810022	0.198513	0.842644	NA
ENSG00000007237.18_4	19	17	[ENST00000323816.8_2, ENST00000396115.6_1, ENST00000432992.6_1, ENST00000437099.6_2, ENST00000542249.5_2, ENST00000578456.1_1, ENST00000578599.5_1, ENST00000578655.1_1, ENST00000579140.5_1, ENST00000579158.5_3, ENST00000580043.1_1, ENST00000580811.5_2, ENST00000580865.5_2, ENST00000581112.5_1, ENST00000581871.5_1, ENST00000583882.5_2, ENST00000584146.6_1, ENST00000584389.5_2, ENST00000585266.5_2]	chr17:9813925-10101868	-	-	23	287943	10100	819	9281	0.918911	ENST00000323816.8_2, ENST00000396115.6_1, ENST00000432992.6_1, ENST00000437099.6_2, ENST00000542249.5_2, ENST00000578456.1_1, ENST00000578599.5_1, ENST00000578655.1_1, ENST00000579140.5_1, ENST00000579158.5_3, ENST00000580043.1_1, ENST00000580811.5_2, ENST00000580865.5_2, ENST00000581112.5_1, ENST00000581871.5_1, ENST00000583882.5_2, ENST00000584146.6_1, ENST00000584389.5_2, ENST00000585266.5_2	AC005747.1	lncRNA, protein_coding, retained_intron	GAS7	0	0	0.1	0	0.34	0	0.21	0.35	0	1.43373	-2.13501	-0.862006	0.388684	NA	1.43373	-0.865236	-0.360293	0.718628	NA
ENSG00000007255.10_2	5	3	[ENST00000006275.8_1, ENST00000585934.1_1, ENST00000587818.1_1, ENST00000588062.5_1, ENST00000592647.1_1]	chr19:45666185-45681495	-	-	6	15310	933	0	933	1	ENST00000006275.8_1, ENST00000585934.1_1, ENST00000587818.1_1, ENST00000588062.5_1, ENST00000592647.1_1	TRAPPC6A	protein_coding, retained_intron	TRAPPC6A	16.39	17.87	20.22	16.83	15.14	20.13	18.99	18.11	16.77	104.962	0.249008	1.1291	0.258854	0.446165	104.962	-0.0156052	-0.0707551	0.943593	0.999983
ENSG00000007264.15_5	15	15	[ENST00000310132.11_3, ENST00000395040.6_2, ENST00000395045.6_2, ENST00000585778.5_2, ENST00000587180.1_1, ENST00000588983.5_1, ENST00000590028.5_3, ENST00000590493.5_1, ENST00000590821.1_1, ENST00000590849.1_1, ENST00000590980.1_3, ENST00000591059.1_1, ENST00000592300.1_1, ENST00000592612.1_1, ENST00000619596.4_2]	chr19:3777967-3802127	-	-	22	24160	4138	461	3677	0.888594	ENST00000310132.11_3, ENST00000395040.6_2, ENST00000395045.6_2, ENST00000585778.5_2, ENST00000587180.1_1, ENST00000588983.5_1, ENST00000590028.5_3, ENST00000590493.5_1, ENST00000590821.1_1, ENST00000590849.1_1, ENST00000590980.1_3, ENST00000591059.1_1, ENST00000592300.1_1, ENST00000592612.1_1, ENST00000619596.4_2	MATK	lncRNA, protein_coding	MATK	3.6	2.15	2.33	2.72	2.81	2.93	4.14	3.68	3.26	37.7803	-0.223042	-0.631987	0.527395	0.694974	37.7803	-0.351974	-0.987596	0.323351	0.999983
ENSG00000007306.15_3	4	4	[ENST00000006724.7_1, ENST00000401731.6_2, ENST00000599715.1_1, ENST00000602225.1_1]	chr19:42177230-42210895	-	-	7	33665	2653	1355	1298	0.489257	ENST00000006724.7_1, ENST00000401731.6_2, ENST00000599715.1_1, ENST00000602225.1_1	CEACAM7	lncRNA, protein_coding	CEACAM7	0	0	0	0	0	0	0.11	0	0.04	0.325827	-2.17306	-0.54604	0.585039	NA	0.325827	-2.36327	-0.593846	0.552615	NA
ENSG00000007312.12_4	6	6	[ENST00000006750.7_2, ENST00000349817.2_1, ENST00000392795.7_2, ENST00000558969.1_1, ENST00000559358.1_1, ENST00000583260.1_1]	chr17:62006099-62009714	-	-	6	3615	2080	0	2080	1	ENST00000006750.7_2, ENST00000349817.2_1, ENST00000392795.7_2, ENST00000558969.1_1, ENST00000559358.1_1, ENST00000583260.1_1, ENST00000647774.1_1	AC127029.3, CD79B	protein_coding, retained_intron	CD79B	0	0	0	0	0	0	0	0	0
ENSG00000007314.12_2	3	3	[ENST00000435607.3_2, ENST00000581514.1_1, ENST00000584310.1_1]	chr17:62015913-62050278	-	-	24	34365	8243	0	8243	1	ENST00000435607.3_2, ENST00000581514.1_1, ENST00000584310.1_1	SCN4A	protein_coding, retained_intron	SCN4A	0	0.02	0.02	0.19	0.17	0.17	0.02	0.01	0.01	3.04689	0.303965	0.216702	0.828441	NA	3.04689	3.68043	2.86291	0.00419768	NA
ENSG00000007341.19_4	28	24	[ENST00000343210.11_2, ENST00000358039.9_3, ENST00000360743.8_2, ENST00000361846.7_1, ENST00000369664.1_1, ENST00000369666.5_2, ENST00000369669.5_1, ENST00000418497.5_1, ENST00000459630.5_1, ENST00000463235.5_1, ENST00000466360.5_1, ENST00000467335.5_1, ENST00000470519.5_1, ENST00000470683.1_1, ENST00000473206.5_1, ENST00000477332.5_1, ENST00000477682.1_1, ENST00000479436.5_1, ENST00000480988.5_1…	chr1:113066135-113163447	-	-	24	97312	8108	1122	6986	0.861618	ENST00000343210.11_2, ENST00000358039.9_3, ENST00000360743.8_2, ENST00000361846.7_1, ENST00000369664.1_1, ENST00000369666.5_2, ENST00000369669.5_1, ENST00000418497.5_1, ENST00000459630.5_1, ENST00000463235.5_1, ENST00000466360.5_1, ENST00000467335.5_1, ENST00000470519.5_1, ENST00000470683.1_1, ENST00000473206.5_1, ENST00000477332.5_1, ENST00000477682.1_1, ENST00000479436.5_1, ENST00000480988.5_1,…	ST7L	lncRNA, nonsense_mediated_decay, protein_coding	ST7L	6.88	7.51	11.3	5.84	9.85	9.71	7.67	9	7.33	103.767	0.321686	1.2462	0.212693	0.393042	103.767	0.104869	0.410073	0.681753	0.999983
ENSG00000007350.17_4	8	8	[ENST00000369912.2_1, ENST00000369915.8_2, ENST00000426203.5_4, ENST00000426989.5_3, ENST00000439635.5_1, ENST00000463884.1_1, ENST00000465168.1_1, ENST00000482044.1_1]	chrX:153524147-153558700	+	-	14	34553	3526	129	3397	0.963415	ENST00000369912.2_1, ENST00000369915.8_2, ENST00000426203.5_5, ENST00000426989.5_3, ENST00000439635.5_1, ENST00000463884.1_1, ENST00000465168.1_1, ENST00000482044.1_1	TKTL1	lncRNA, nonsense_mediated_decay, protein_coding	TKTL1	0	0	0	0	0	0	0	0	0
ENSG00000007372.22_6	84	71	[ENST00000241001.13_3, ENST00000379107.7_3, ENST00000379109.7_3, ENST00000379111.7_3, ENST00000379115.9_5, ENST00000379123.10_3, ENST00000379129.7_3, ENST00000379132.8_3, ENST00000419022.6_3, ENST00000423822.7_2, ENST00000438681.6_2, ENST00000455099.6_5, ENST00000464174.6_2, ENST00000470027.7_2, ENST00000471303.6_2, ENST00000474783.2_2, ENST00000481563.6_4, ENST00000494377.7_2, ENST00000524853.6_…	chr11:31806326-31839610	-	-	14	33284	20812	0	20812	1	ENST00000241001.13_3, ENST00000379107.7_3, ENST00000379109.7_3, ENST00000379111.7_3, ENST00000379115.9_5, ENST00000379123.10_3, ENST00000379129.7_3, ENST00000379132.8_3, ENST00000419022.6_3, ENST00000423822.7_2, ENST00000438681.6_2, ENST00000455099.6_5, ENST00000464174.6_2, ENST00000470027.7_2, ENST00000471303.6_2, ENST00000474783.2_2, ENST00000481563.6_4, ENST00000494377.7_2, ENST00000524853.6_2…	PAX6	lncRNA, nonsense_mediated_decay, protein_coding, retained_intron	PAX6	0.17	0.19	0.21	0	0	0.06	0.35	0.18	0	1.59187	0.585092	0.332362	0.739616	NA	1.59187	-3.17824	-1.57131	0.11611	NA
ENSG00000007376.8_3	10	9	[ENST00000007264.7_2, ENST00000561734.5_1, ENST00000562070.1_1, ENST00000563560.1_1, ENST00000565377.1_1, ENST00000565503.5_1, ENST00000565809.5_2, ENST00000567114.5_2, ENST00000567283.5_1, ENST00000569601.5_1]	chr16:834973-838397	-	-	5	3424	2769	120	2649	0.956663	ENST00000007264.7_2, ENST00000561734.5_1, ENST00000562070.1_1, ENST00000563560.1_1, ENST00000565377.1_1, ENST00000565503.5_1, ENST00000565809.5_2, ENST00000567114.5_2, ENST00000567283.5_1, ENST00000569601.5_1	RPUSD1	nonsense_mediated_decay, protein_coding	RPUSD1	11.91	10.68	12.35	10.2	8.72	11.65	9.44	13.12	10.88	242.556	0.304694	1.64098	0.100801	0.239671	242.556	-0.0893692	-0.478411	0.632358	0.999983
ENSG00000007384.15_4	11	10	[ENST00000262316.10_1, ENST00000417043.5_1, ENST00000419764.1_3, ENST00000428730.5_1, ENST00000448893.1_1, ENST00000450643.5_3, ENST00000472390.1_1, ENST00000482904.1_1, ENST00000486045.1_1, ENST00000487201.1_1, ENST00000493647.1_1]	chr16:108057-126354	-	-	15	18297	4914	0	4914	1	ENST00000262316.10_1, ENST00000417043.5_1, ENST00000419764.1_3, ENST00000428730.5_1, ENST00000448893.1_1, ENST00000450643.5_3, ENST00000472390.1_1, ENST00000482904.1_1, ENST00000486045.1_1, ENST00000487201.1_1, ENST00000493647.1_1	RHBDF1	nonsense_mediated_decay, protein_coding, retained_intron	RHBDF1	33.93	28.95	35.18	29.11	24.36	28.18	32.05	33.72	35.22	725.361	0.186246	1.15377	0.248595	0.435336	725.361	-0.277711	-1.71479	0.0863836	0.795299
ENSG00000007392.16_3	21	19	[ENST00000293872.12_1, ENST00000337351.8_1, ENST00000397780.5_3, ENST00000397783.5_1, ENST00000418978.5_1, ENST00000419516.5_1, ENST00000426094.5_1, ENST00000428363.1_2, ENST00000429378.5_3, ENST00000430864.5_1, ENST00000442701.1_1, ENST00000443357.5_1, ENST00000464711.5_1, ENST00000467552.1_1, ENST00000468732.5_1, ENST00000469109.1_1, ENST00000490762.5_1, ENST00000494366.5_1, ENST00000494545.1_3…	chr16:238967-279462	-	-	10	40495	6176	1133	5043	0.816548	ENST00000293872.12_1, ENST00000337351.8_1, ENST00000397780.5_3, ENST00000397783.5_1, ENST00000418978.5_1, ENST00000419516.5_1, ENST00000426094.5_1, ENST00000428363.1_3, ENST00000429378.5_3, ENST00000430864.5_1, ENST00000442701.1_1, ENST00000443357.5_1, ENST00000464711.5_1, ENST00000467552.1_1, ENST00000468732.5_1, ENST00000469109.1_1, ENST00000490762.5_1, ENST00000494366.5_1, ENST00000494545.1_3,…	LUC7L	lncRNA, nonsense_mediated_decay, protein_coding, retained_intron	LUC7L	14.19	15.97	16.46	20.28	26.87	23.5	23.03	30.75	20.45	400.443	-0.429738	-3.03548	0.00240153	0.0168222	400.443	-0.033115	-0.237877	0.811976	0.999983
ENSG00000007402.11_3	8	6	[ENST00000266039.7_2, ENST00000360963.7_2, ENST00000423994.6_2, ENST00000424201.6_2, ENST00000429770.5_2, ENST00000479441.1_2, ENST00000483620.1_1, ENST00000487413.1_1]	chr3:50400229-50541675	-	-	40	141446	6322	50	6272	0.992091	ENST00000266039.7_2, ENST00000360963.7_2, ENST00000423994.6_2, ENST00000424201.6_2, ENST00000429770.5_2, ENST00000479441.1_2, ENST00000483620.1_1, ENST00000487413.1_1	CACNA2D2	lncRNA, protein_coding, retained_intron	CACNA2D2	1.05	0.84	0.88	0.33	0.65	0.56	0.94	0.42	0.77	32.8108	0.626918	1.476	0.139943	0.295549	32.8108	-0.442186	-0.995339	0.319571	0.999983
ENSG00000007516.13_5	16	13	[ENST00000324385.9_1, ENST00000397488.6_3, ENST00000421665.6_4, ENST00000426824.7_1, ENST00000561602.1_1, ENST00000561793.1_3, ENST00000562208.5_1, ENST00000564213.1_1, ENST00000565665.5_1, ENST00000566162.1_1, ENST00000566389.1_1, ENST00000567203.1_1, ENST00000567825.3_1, ENST00000568198.1_1, ENST00000568887.5_3, ENST00000628027.2_3]	chr16:1383601-1399442	+	-	34	15841	6146	73	6073	0.988122	ENST00000324385.9_1, ENST00000397488.6_3, ENST00000421665.6_4, ENST00000426824.7_1, ENST00000561602.1_1, ENST00000561793.1_3, ENST00000562208.5_1, ENST00000564213.1_1, ENST00000565665.5_1, ENST00000566162.1_1, ENST00000566389.1_1, ENST00000567203.1_1, ENST00000567825.3_1, ENST00000568198.1_1, ENST00000568887.5_3, ENST00000628027.2_3	BAIAP3	lncRNA, protein_coding, retained_intron	BAIAP3	1.9	0.73	1.05	0.74	0.79	1.04	0.93	0.66	6.47	37.3223	-0.814812	-1.16346	0.244644	0.430803	37.3223	-1.54832	-2.17595	0.029559	0.573658
ENSG00000007520.4_3	2	2	[ENST00000007390.3_2, ENST00000566296.1_1]	chr16:1399240-1401879	-	-	6	2639	1210	0	1210	1	ENST00000007390.3_2, ENST00000566296.1_1	TSR3	nonsense_mediated_decay, protein_coding	TSR3	10.92	8.16	9.3	6.21	11.48	9.03	12.04	14.3	6.62	113.63	0.045816	0.165656	0.868427	0.927617	113.63	-0.264083	-0.951219	0.341493	0.999983
ENSG00000007541.16_4	25	25	[ENST00000026218.9_2, ENST00000293874.2_1, ENST00000321878.9_2, ENST00000409527.6_2, ENST00000420990.6_3, ENST00000422307.6_1, ENST00000439574.1_3, ENST00000443147.5_1, ENST00000470411.2_1, ENST00000476438.1_1, ENST00000480424.6_1, ENST00000537901.1_1, ENST00000540241.1_3, ENST00000540548.1_1, ENST00000544860.1_1, ENST00000634341.1_1, ENST00000635205.1_3, ENST00000635909.1_3, ENST00000635935.1_1,…	chr16:616994-634136	+	-	13	17142	7904	407	7497	0.948507	ENST00000026218.9_2, ENST00000293874.2_1, ENST00000321878.9_2, ENST00000409439.6_1, ENST00000409527.6_2, ENST00000420990.6_3, ENST00000422307.6_1, ENST00000424439.3_2, ENST00000439574.1_3, ENST00000443147.5_1, ENST00000470411.2_1, ENST00000476438.1_1, ENST00000480424.6_1, ENST00000537901.1_1, ENST00000540241.1_3, ENST00000540548.1_1, ENST00000540585.1_1, ENST00000544860.1_1, ENST00000634341.1_1, …	NHLRC4, PIGQ, Z98883.1	lncRNA, nonsense_mediated_decay, protein_coding, retained_intron	NHLRC4, PIGQ	15.74	9.99	15.15	14.24	10.22	11.66	11.01	14.89	12.77	266.875	0.323044	1.40012	0.161477	0.325651	266.875	-0.0571686	-0.247466	0.804547	0.999983
ENSG00000007545.15_3	8	8	[ENST00000293925.9_1, ENST00000397412.7_1, ENST00000415022.1_3, ENST00000466562.5_1, ENST00000467286.1_1, ENST00000468839.1_1, ENST00000492778.5_1, ENST00000498594.5_1]	chr16:1662325-1727909	+	-	21	65584	8373	310	8063	0.962976	ENST00000293925.9_1, ENST00000397412.7_1, ENST00000415022.1_3, ENST00000454337.1_1, ENST00000466562.5_1, ENST00000467286.1_1, ENST00000468839.1_1, ENST00000492778.5_1, ENST00000498594.5_1	AL031708.1, CRAMP1	nonsense_mediated_decay, protein_coding, retained_intron	LA16c-431H6.6, CRAMP1L	14.42	12.4	15.65	12.02	13.95	11.1	9.03	14.57	15.12	370.108	0.365575	1.72623	0.0843067	0.21275	370.108	-0.0342502	-0.161134	0.871988	0.999983
ENSG00000007866.21_7	3	3	[ENST00000338863.12_6, ENST00000402886.8_4, ENST00000639578.2_5]	chr6:35441373-35464856	-	-	14	23483	3049	192	2857	0.937029	ENST00000338863.12_7, ENST00000402886.8_4, ENST00000639578.2_5	TEAD3	nonsense_mediated_decay, protein_coding	TEAD3	12.47	12.55	14.24	9.92	10.72	11.17	11.19	9.95	12.73	362.817	0.43285	2.48557	0.0129344	0.0567559	362.817	-0.0716511	-0.409073	0.682486	0.999983
ENSG00000007908.16_5	7	5	[ENST00000333360.12_4, ENST00000367774.1_1, ENST00000367775.5_1, ENST00000367776.5_3, ENST00000367777.5_3, ENST00000461085.1_1, ENST00000609271.1_3]	chr1:169691780-169733846	-	-	15	42066	4586	382	4204	0.916703	ENST00000333360.12_4, ENST00000367774.1_1, ENST00000367775.5_1, ENST00000367776.5_3, ENST00000367777.5_3, ENST00000454271.1_1, ENST00000461085.1_1, ENST00000609271.1_3	AL021940.1, SELE	lncRNA, protein_coding, retained_intron	SELE	0	0.02	0	0	0.02	0	0	0	0	0.166185	0.852372	0.208888	0.834536	NA	0.166185	0.658074	0.161275	0.871877	NA
ENSG00000007923.16_4	11	11	[ENST00000294401.11_1, ENST00000377577.10_2, ENST00000426784.1_1, ENST00000451196.5_1, ENST00000460594.5_1, ENST00000465508.5_1, ENST00000465911.1_1, ENST00000469318.5_1, ENST00000472414.1_1, ENST00000473993.5_1, ENST00000485073.5_1]	chr1:6694227-6761984	-	-	19	67757	5083	253	4830	0.950226	ENST00000294401.11_1, ENST00000377577.10_2, ENST00000426784.1_1, ENST00000451196.5_1, ENST00000460594.5_1, ENST00000465508.5_1, ENST00000465911.1_1, ENST00000469318.5_1, ENST00000472414.1_1, ENST00000473993.5_1, ENST00000485073.5_1	DNAJC11	lncRNA, protein_coding	DNAJC11	10.77	9.18	9.57	11.81	15.72	17.58	16.22	16.54	9.95	336.13	-0.27924	-1.46154	0.143866	0.30086	336.13	0.121327	0.636137	0.524687	0.999983
ENSG00000007933.13_4	6	5	[ENST00000367755.9_2, ENST00000472784.5_1, ENST00000478457.1_1, ENST00000479749.1_1, ENST00000530212.5_1, ENST00000534514.1_1]	chr1:171060041-171086959	+	-	11	26918	3439	1205	2234	0.649607	ENST00000367755.9_2, ENST00000472784.5_1, ENST00000478457.1_1, ENST00000479749.1_1, ENST00000530212.5_1, ENST00000534514.1_1	FMO3	lncRNA, nonsense_mediated_decay, protein_coding	FMO3	0	0.3	0.03	0	0	0	0	0	0	0.44883	2.8977	0.727239	0.46708	NA	0.44883	0	0	1	NA
ENSG00000007944.15_3	2	2	[ENST00000349606.4_1, ENST00000356840.8_2]	chr6:16129316-16148479	+	-	7	19163	3072	0	3072	1	ENST00000349606.4_1, ENST00000356840.8_2	MYLIP	protein_coding	MYLIP	2.63	3.45	2.74	3.28	2.71	2.64	2.83	2.73	2.72	106.49	0.31752	1.40286	0.160659	0.324503	106.49	0.091974	0.406031	0.684719	0.999983
ENSG00000007952.18_4	5	4	[ENST00000217885.5_1, ENST00000372960.8_1, ENST00000372964.5_2, ENST00000372966.8_2, ENST00000427768.5_1]	chrX:100098312-100129348	-	-	13	31036	2543	0	2543	1	ENST00000217885.5_1, ENST00000372960.8_1, ENST00000372964.5_2, ENST00000372966.8_2, ENST00000427768.5_1	NOX1	protein_coding	NOX1	0	0	0	0	0	0	0	0	0
ENSG00000007968.7_3	2	2	[ENST00000361729.3_2, ENST00000487237.1_1]	chr1:23832929-23857725	-	-	7	24796	5462	310	5152	0.943244	ENST00000361729.3_2, ENST00000487237.1_1	E2F2	lncRNA, protein_coding	E2F2	2.2	1.81	2.17	2.14	2.76	2.16	2.03	2.37	2.07	135.009	0.171125	0.851048	0.394743	0.583698	135.009	0.151843	0.754858	0.450334	0.999983
ENSG00000008018.9_3	2	2	[ENST00000262193.7_2, ENST00000462957.1_1]	chr6:170844207-170862395	-	-	6	18188	2219	329	1890	0.851735	ENST00000262193.7_2, ENST00000462957.1_1	PSMB1	lncRNA, protein_coding	PSMB1	29.18	40.17	35.49	53.5	81.55	69.64	58.23	88.79	40.92	554.433	-0.588208	-2.93788	0.00330463	0.0211464	554.433	0.175038	0.883777	0.376817	0.999983
ENSG00000008056.14_5	5	4	[ENST00000295987.13_3, ENST00000340666.5_3, ENST00000638337.1_1, ENST00000639776.1_1, ENST00000640721.1_1]	chrX:47431299-47479256	-	-	14	47957	3733	0	3733	1	ENST00000295987.13_3, ENST00000340666.5_3, ENST00000638337.1_1, ENST00000638776.2_2, ENST00000639776.1_1, ENST00000640721.1_1	SYN1, Z84466.1	protein_coding, retained_intron	SYN1	0.72	1.22	1.19	3.03	1.46	0.98	0.86	1.6	1.52	22.8529	-0.14234	-0.261004	0.79409	0.884503	22.8529	0.496628	0.927498	0.353668	0.999983
ENSG00000008083.14_3	3	3	[ENST00000341776.7_2, ENST00000397311.4_1, ENST00000474854.1_1]	chr6:15246299-15522273	+	-	20	275974	6244	0	6244	1	ENST00000341776.7_2, ENST00000397311.4_1, ENST00000474854.1_1	JARID2	lncRNA, protein_coding	JARID2	1.88	2.28	1.84	3.04	3.01	3.41	4.06	3.76	4.03	218.047	-0.75788	-4.23921	2.24306e-05	0.00044545	218.047	-0.297687	-1.71092	0.0870956	0.796346
ENSG00000008086.11_3	11	11	[ENST00000379989.6_1, ENST00000379996.7_1, ENST00000463994.4_2, ENST00000623364.3_3, ENST00000623535.1_2, ENST00000623610.1_1, ENST00000624700.3_1, ENST00000624953.1_1, ENST00000635828.1_1, ENST00000636046.1_1, ENST00000637881.1_2]	chrX:18443702-18671749	+	-	28	228047	17075	2864	14211	0.832269	ENST00000379989.6_1, ENST00000379996.7_1, ENST00000463994.4_2, ENST00000623364.3_3, ENST00000623535.1_2, ENST00000623610.1_1, ENST00000624700.3_1, ENST00000624953.1_1, ENST00000635828.1_1, ENST00000636046.1_1, ENST00000637881.1_2	CDKL5	lncRNA, protein_coding, retained_intron	CDKL5	3.92	4.91	3.53	5.22	3.6	3.57	4.75	4.03	4.9	243.001	0.0692399	0.300018	0.764163	0.865121	243.001	-0.11584	-0.500368	0.616816	0.999983
ENSG00000008118.10_4	5	4	[ENST00000009105.5_1, ENST00000361322.3_2, ENST00000423146.5_1, ENST00000494990.1_1, ENST00000651530.1_1]	chr1:209757058-209787284	+	-	14	30226	3328	156	3172	0.953125	ENST00000009105.5_1, ENST00000361322.3_2, ENST00000423146.5_1, ENST00000494990.1_1, ENST00000651530.1_1	CAMK1G	lncRNA, protein_coding	CAMK1G	0	0.23	0	0	0	0	0	0	0	0.556387	3.21232	0.805779	0.420371	NA	0.556387	0	0	1	NA
ENSG00000008128.23_5	23	19	[ENST00000356200.7_2, ENST00000356937.7_1, ENST00000357760.6_3, ENST00000358779.9_2, ENST00000378633.5_3, ENST00000378638.6_2, ENST00000401096.2_3, ENST00000404249.8_2, ENST00000460465.5_1, ENST00000463652.5_1, ENST00000464748.1_1, ENST00000468397.1_1, ENST00000468800.5_1, ENST00000474916.1_1, ENST00000478901.1_1, ENST00000479362.1_3, ENST00000487462.1_1, ENST00000489300.1_1, ENST00000491311.1_1,…	chr1:1633817-1655796	-	-	15	21979	5085	160	4925	0.968535	ENST00000356200.7_2, ENST00000356937.7_1, ENST00000357760.6_3, ENST00000358779.9_2, ENST00000378633.5_3, ENST00000378638.6_2, ENST00000401096.2_3, ENST00000404249.8_2, ENST00000460465.5_1, ENST00000463652.5_1, ENST00000464748.1_1, ENST00000468397.1_1, ENST00000468800.5_1, ENST00000474916.1_1, ENST00000478901.1_1, ENST00000479362.1_3, ENST00000487462.1_1, ENST00000489300.1_1, ENST00000491311.1_1, …	AL031282.2, CDK11A	lncRNA, nonsense_mediated_decay, protein_coding, retained_intron	CDK11A	5.76	4.44	6.58	6.44	7.42	6.34	6.58	7.46	6.36	86.0266	-0.0376901	-0.155547	0.87639	0.932617	86.0266	0.0170182	0.0719645	0.94263	0.999983
ENSG00000008130.15_2	17	16	[ENST00000341426.9_1, ENST00000341991.7_1, ENST00000342348.9_1, ENST00000378625.5_1, ENST00000460602.5_1, ENST00000464373.1_1, ENST00000469045.5_1, ENST00000477235.5_1, ENST00000480499.5_1, ENST00000480542.1_1, ENST00000489538.1_1, ENST00000492768.5_1, ENST00000492845.6_1, ENST00000497186.5_1, ENST00000497615.1_1, ENST00000497747.5_1, ENST00000498806.1_1]	chr1:1682670-1711896	-	-	17	29226	5570	355	5215	0.936266	ENST00000341426.9_1, ENST00000341991.7_1, ENST00000342348.9_1, ENST00000378625.5_1, ENST00000460602.5_1, ENST00000464373.1_1, ENST00000469045.5_1, ENST00000477235.5_1, ENST00000480499.5_1, ENST00000480542.1_1, ENST00000489538.1_1, ENST00000492768.5_1, ENST00000492845.6_1, ENST00000497186.5_1, ENST00000497615.1_1, ENST00000497747.5_1, ENST00000498806.1_1	NADK	lncRNA, nonsense_mediated_decay, protein_coding, retained_intron	NADK	15.98	17.59	16.81	21.61	20.36	20.19	22.14	20.55	25.22	407.037	-0.208562	-1.23787	0.215762	0.396503	407.037	-0.102769	-0.614496	0.538888	0.999983
ENSG00000008196.13_4	3	3	[ENST00000344788.7_3, ENST00000393655.4_2, ENST00000489228.1_1]	chr6:50786435-50815332	+	-	8	28897	6155	0	6155	1	ENST00000344788.7_3, ENST00000393655.4_2, ENST00000489228.1_1	TFAP2B	lncRNA, protein_coding	TFAP2B	0	0	0	0	0	0	0	0	0
ENSG00000008197.4_4	2	2	[ENST00000008391.3_1, ENST00000492804.1_1]	chr6:50681540-50740701	+	-	9	59161	1856	0	1856	1	ENST00000008391.3_1, ENST00000492804.1_1	TFAP2D	lncRNA, protein_coding	TFAP2D	0	0	0	0	0	0	0	0	0
ENSG00000008226.19_3	7	5	[ENST00000308059.10_1, ENST00000346219.7_1, ENST00000440294.6_1, ENST00000447130.1_3, ENST00000469151.1_1, ENST00000477260.1_1, ENST00000478428.1_1]	chr3:38080695-38165516	+	-	34	84821	8338	581	7757	0.930319	ENST00000308059.10_1, ENST00000346219.7_1, ENST00000440294.6_1, ENST00000447130.1_3, ENST00000469151.1_1, ENST00000477260.1_1, ENST00000478428.1_1	DLEC1	lncRNA, nonsense_mediated_decay, protein_coding, retained_intron	DLEC1	0	0.02	0.01	0	0.03	0.05	0.02	0	0	0.590936	0.514223	0.191549	0.848096	NA	0.590936	1.28195	0.489515	0.624477	NA
ENSG00000008256.16_4	11	9	[ENST00000350796.8_2, ENST00000396741.3_2, ENST00000461891.5_1, ENST00000465320.1_1, ENST00000466543.1_1, ENST00000478541.1_1, ENST00000481329.1_1, ENST00000482460.1_1, ENST00000488964.5_1, ENST00000491641.5_1, ENST00000495176.5_1]	chr7:6201406-6312275	-	-	16	110869	5808	69	5739	0.98812	ENST00000350796.8_2, ENST00000396741.3_2, ENST00000461891.5_1, ENST00000465320.1_1, ENST00000466543.1_1, ENST00000478541.1_1, ENST00000481329.1_1, ENST00000482460.1_1, ENST00000488964.5_1, ENST00000491641.5_1, ENST00000495176.5_1	CYTH3	lncRNA, protein_coding, retained_intron	CYTH3	4.68	4.33	4.88	3.71	2.72	3.21	5.95	3.9	2.4	110.204	0.449139	1.5497	0.121213	0.271303	110.204	-0.28362	-0.969938	0.332077	0.999983
ENSG00000008277.14_2	11	11	[ENST00000265727.11_2, ENST00000398201.8_1, ENST00000398203.7_2, ENST00000398204.8_1, ENST00000398209.7_2, ENST00000412441.5_1, ENST00000413139.1_1, ENST00000426930.5_1, ENST00000439864.5_1, ENST00000476330.1_1, ENST00000478920.1_1]	chr7:87563457-87832204	+	-	36	268747	12199	647	11552	0.946963	ENST00000265727.11_2, ENST00000398201.8_1, ENST00000398203.7_2, ENST00000398204.8_1, ENST00000398209.7_2, ENST00000412441.5_1, ENST00000413139.1_1, ENST00000426930.5_1, ENST00000439864.5_1, ENST00000476330.1_1, ENST00000478920.1_1	ADAM22	lncRNA, protein_coding	ADAM22	0.39	0.35	0.67	0.79	0.82	1.33	1.31	0.83	0.84	53.1414	-0.885049	-2.39253	0.0167327	0.0683236	53.1414	0.00832313	0.02344	0.981299	0.999983
ENSG00000008282.8_4	7	6	[ENST00000011473.6_1, ENST00000455385.6_1, ENST00000460770.1_1, ENST00000464029.5_3, ENST00000470347.1_1, ENST00000483448.1_1, ENST00000634737.1_1]	chr7:105730948-105753022	-	-	8	22074	2804	122	2682	0.956491	ENST00000011473.6_1, ENST00000455385.6_1, ENST00000460770.1_1, ENST00000464029.5_3, ENST00000470347.1_1, ENST00000483448.1_1, ENST00000634737.1_1	SYPL1	nonsense_mediated_decay, protein_coding, retained_intron	SYPL1	70.6	96.91	89.45	151.59	147.8	152.37	155.86	154.21	150.16	2810.94	-0.621441	-5.11406	3.15314e-07	1.28512e-05	2810.94	0.00191801	0.0158513	0.987353	0.999983
ENSG00000008283.16_4	21	18	[ENST00000360793.8_2, ENST00000392975.6_1, ENST00000392976.5_1, ENST00000448884.6_1, ENST00000542042.5_1, ENST00000577368.5_1, ENST00000577989.5_1, ENST00000578016.1_1, ENST00000578072.1_1, ENST00000580592.1_2, ENST00000580691.5_2, ENST00000581163.5_1, ENST00000581573.5_1, ENST00000582034.5_1, ENST00000582143.1_1, ENST00000582297.5_1, ENST00000582997.5_2, ENST00000583478.1_1, ENST00000584031.5_1,…	chr17:61509664-61523715	-	-	13	14051	5296	223	5073	0.957893	ENST00000360793.8_2, ENST00000392975.6_1, ENST00000392976.5_1, ENST00000448884.6_1, ENST00000542042.5_1, ENST00000577368.5_1, ENST00000577989.5_1, ENST00000578016.1_1, ENST00000578072.1_1, ENST00000580592.1_2, ENST00000580691.5_2, ENST00000581163.5_1, ENST00000581573.5_1, ENST00000582034.5_1, ENST00000582143.1_1, ENST00000582297.5_1, ENST00000582997.5_2, ENST00000583478.1_1, ENST00000584031.5_1, …	CYB561	lncRNA, protein_coding, retained_intron	CYB561	72.07	71.94	78.38	66.92	78.32	72.99	88.06	86.89	66.52	1577.9	0.120018	1.12501	0.260584	0.448233	1577.9	-0.110393	-1.03425	0.301021	0.999983
ENSG00000008294.21_4	22	20	[ENST00000262013.12_3, ENST00000357122.8_2, ENST00000502329.1_1, ENST00000505173.5_1, ENST00000505279.5_2, ENST00000506483.1_1, ENST00000506500.1_1, ENST00000509724.1_1, ENST00000510283.5_1, ENST00000510855.1_2, ENST00000511312.2_1, ENST00000511795.1_2, ENST00000511987.5_1, ENST00000513547.5_1, ENST00000513746.6_1, ENST00000513827.5_1, ENST00000513906.1_2, ENST00000514205.1_1, ENST00000514613.5_1…	chr17:49039534-49198229	-	-	39	158695	11966	1412	10554	0.881999	ENST00000262013.12_3, ENST00000357122.8_2, ENST00000502329.1_1, ENST00000505173.5_1, ENST00000505279.5_2, ENST00000506483.1_1, ENST00000506500.1_1, ENST00000509724.1_1, ENST00000510283.5_1, ENST00000510855.1_3, ENST00000511312.2_1, ENST00000511795.1_3, ENST00000511987.5_1, ENST00000513547.5_1, ENST00000513746.6_1, ENST00000513827.5_1, ENST00000513906.1_3, ENST00000514205.1_1, ENST00000514613.5_1,…	SPAG9	lncRNA, nonsense_mediated_decay, protein_coding, retained_intron	SPAG9	9.77	10.95	10.24	13.31	13.28	12.36	12.32	18.22	9.47	597.762	-0.114957	-0.705268	0.480644	0.658183	597.762	0.0195638	0.121192	0.903539	0.999983
ENSG00000008300.17_4	4	3	[ENST00000164024.5_2, ENST00000461362.5_1, ENST00000470999.1_1, ENST00000498057.1_1]	chr3:48673895-48700319	-	-	31	26424	13850	63	13787	0.995451	ENST00000164024.5_2, ENST00000461362.5_1, ENST00000470999.1_1, ENST00000498057.1_1, ENST00000577502.1	CELSR3, MIR4793	miRNA, protein_coding, retained_intron	CELSR3	0.92	1	1.08	0.63	0.41	0.49	0.47	0.75	0.56	76.606	0.995503	3.67924	0.000233932	0.00282724	76.606	-0.192587	-0.687815	0.491569	0.999983
ENSG00000008311.15_3	7	6	[ENST00000358954.6_1, ENST00000393376.5_1, ENST00000417368.7_2, ENST00000426162.1_1, ENST00000431170.5_1, ENST00000460376.5_1, ENST00000473553.5_1]	chr7:121713602-121784309	-	-	24	70707	6664	2294	4370	0.655762	ENST00000358954.6_1, ENST00000393376.5_1, ENST00000417368.7_2, ENST00000426162.1_1, ENST00000431170.5_1, ENST00000460376.5_1, ENST00000473553.5_1	AASS	lncRNA, nonsense_mediated_decay, protein_coding, retained_intron	AASS	0.99	0.34	0.7	0.17	0.24	0.28	0.19	0.73	0.45	15.7207	0.851459	1.42217	0.154977	0.316598	15.7207	-0.948028	-1.49654	0.134512	0.893136
ENSG00000008323.15_3	9	9	[ENST00000011684.11_2, ENST00000304581.8_1, ENST00000396988.7_2, ENST00000449001.6_2, ENST00000535616.1_1, ENST00000536531.5_2, ENST00000538208.1_1, ENST00000543000.1_1, ENST00000544743.1_1]	chr12:6419601-6437672	+	-	20	18071	4260	134	4126	0.968545	ENST00000011684.11_2, ENST00000304581.8_1, ENST00000396988.7_2, ENST00000449001.6_2, ENST00000535616.1_1, ENST00000536531.5_2, ENST00000538208.1_1, ENST00000543000.1_1, ENST00000544743.1_1	PLEKHG6	lncRNA, protein_coding	PLEKHG6	6.73	5.33	6.61	2.87	6.66	3.24	4.11	4.8	5.89	88.9257	0.56947	1.79749	0.0722577	0.191694	88.9257	-0.2371	-0.741472	0.458408	0.999983
ENSG00000008324.11_2	3	3	[ENST00000011691.5_2, ENST00000447630.5_2, ENST00000474941.1_1]	chr3:42623331-42636606	+	-	4	13275	1298	219	1079	0.831279	ENST00000011691.5_2, ENST00000447630.5_2, ENST00000474941.1_1	SS18L2	protein_coding, retained_intron	SS18L2	2.18	3.2	2.62	5.07	6.63	4.11	3.69	5.96	4.49	33.3898	-0.592159	-1.57125	0.116126	0.263416	33.3898	0.196131	0.550506	0.581972	0.999983
ENSG00000008382.15_5	8	8	[ENST00000262966.12_1, ENST00000359935.8_4, ENST00000594162.1_1, ENST00000594716.5_1, ENST00000596722.5_3, ENST00000597036.5_1, ENST00000599840.5_1, ENST00000601877.1_2]	chr19:4343523-4360083	+	-	13	16560	2049	76	1973	0.962909	ENST00000262966.12_1, ENST00000359935.8_4, ENST00000594162.1_1, ENST00000594716.5_1, ENST00000596722.5_3, ENST00000597036.5_1, ENST00000599840.5_1, ENST00000601877.1_2	MPND	nonsense_mediated_decay, protein_coding	MPND	1.41	3.1	1.06	1.43	2.5	2.49	2.33	3.44	1.06	30.2038	-0.0807162	-0.165639	0.868441	0.927617	30.2038	-0.03038	-0.0628985	0.949847	0.999983
ENSG00000008394.13_4	19	14	[ENST00000010404.6_1, ENST00000359720.3_1, ENST00000396207.1_1, ENST00000396209.5_1, ENST00000396210.8_2, ENST00000534835.5_1, ENST00000535309.5_1, ENST00000535624.1_1, ENST00000536371.5_1, ENST00000537878.5_1, ENST00000538857.1_1, ENST00000538885.5_3, ENST00000539036.5_1, ENST00000539708.5_1, ENST00000540056.5_1, ENST00000540126.5_1, ENST00000542256.5_1, ENST00000543076.5_2, ENST00000624056.1_1]	chr12:16500075-16762193	+	-	17	262118	7441	2361	5080	0.682704	ENST00000010404.6_1, ENST00000359720.3_1, ENST00000396207.1_1, ENST00000396209.5_1, ENST00000396210.8_2, ENST00000534835.5_1, ENST00000535309.5_1, ENST00000535624.1_1, ENST00000536371.5_1, ENST00000537878.5_1, ENST00000538857.1_1, ENST00000538885.5_4, ENST00000539036.5_1, ENST00000539708.5_1, ENST00000540056.5_1, ENST00000540126.5_2, ENST00000542256.5_1, ENST00000543076.5_2, ENST00000624056.1_1	MGST1	TEC, lncRNA, protein_coding, retained_intron	MGST1	695.66	580.42	617.05	586.88	565.52	532.44	589.82	519.77	658.34	3589.55	0.318401	1.90156	0.0572284	0.163478	3589.55	-0.0531286	-0.317368	0.750964	0.999983
ENSG00000008405.12_4	5	5	[ENST00000008527.10_2, ENST00000546722.1_1, ENST00000549356.1_2, ENST00000550633.1_1, ENST00000552790.5_1]	chr12:107385141-107487327	-	-	14	102186	4782	481	4301	0.899415	ENST00000008527.10_2, ENST00000546722.1_1, ENST00000549356.1_2, ENST00000550633.1_1, ENST00000552790.5_1	CRY1	lncRNA, protein_coding, retained_intron	CRY1	8.5	8.01	9.2	3.01	3.54	4.48	4.41	7.67	6.31	166.311	0.729995	3.23206	0.00122899	0.0099934	166.311	-0.694868	-3.03983	0.00236709	0.152849
ENSG00000008438.5_3	1	1	[ENST00000008938.5_2]	chr19:46522410-46526311	-	-	3	3901	708	0	708	1	ENST00000008938.5_2	PGLYRP1	protein_coding	PGLYRP1	0	0	0	0	0	0	0	0	0
ENSG00000008441.16_5	14	13	[ENST00000358552.7_1, ENST00000360105.8_1, ENST00000397661.6_2, ENST00000585382.5_1, ENST00000585575.5_3, ENST00000586797.5_1, ENST00000586873.1_1, ENST00000587260.1_2, ENST00000587760.5_1, ENST00000588228.5_1, ENST00000588680.1_1, ENST00000590027.1_1, ENST00000591028.1_1, ENST00000592199.5_3]	chr19:13106421-13209610	+	-	15	103189	6302	0	6302	1	ENST00000358552.7_1, ENST00000360105.8_1, ENST00000397661.6_2, ENST00000585382.5_1, ENST00000585575.5_3, ENST00000586797.5_1, ENST00000586873.1_1, ENST00000587260.1_2, ENST00000587760.5_1, ENST00000588228.5_1, ENST00000588680.1_1, ENST00000590027.1_1, ENST00000591028.1_1, ENST00000592199.5_3	NFIX	lncRNA, nonsense_mediated_decay, protein_coding	NFIX	3.09	4.02	3.04	2.47	1.44	2.09	1.94	1.48	2.31	131.874	1.03297	3.63136	0.000281934	0.00324176	131.874	0.0873939	0.302858	0.761998	0.999983
ENSG00000008513.16_6	16	14	[ENST00000399640.3_1, ENST00000517668.5_2, ENST00000518298.5_1, ENST00000519435.5_1, ENST00000519924.5_3, ENST00000520020.5_1, ENST00000521180.5_1, ENST00000521627.1_1, ENST00000522204.1_1, ENST00000522285.1_1, ENST00000522652.6_2, ENST00000522873.1_1, ENST00000523634.1_3, ENST00000523854.5_2, ENST00000523855.1_4, ENST00000648219.1_2]	chr8:134467090-134584183	-	-	16	117093	8852	1229	7623	0.861161	ENST00000399640.3_1, ENST00000517668.5_3, ENST00000518298.5_1, ENST00000519435.5_1, ENST00000519924.5_4, ENST00000520020.5_1, ENST00000521180.5_1, ENST00000521627.1_1, ENST00000522204.1_1, ENST00000522285.1_1, ENST00000522652.6_2, ENST00000522873.1_1, ENST00000523634.1_4, ENST00000523854.5_3, ENST00000523855.1_5, ENST00000648219.1_2	ST3GAL1	lncRNA, protein_coding, retained_intron	ST3GAL1	9.94	10.03	9.72	7.86	7.66	8.26	6.53	7.24	7.69	444.504	0.697848	4.69005	2.73137e-06	7.63285e-05	444.504	0.177406	1.1831	0.236768	0.988917
ENSG00000008516.17_3	4	4	[ENST00000336577.9_2, ENST00000570755.1_1, ENST00000575441.1_1, ENST00000612971.1_1]	chr16:3096561-3110727	+	-	11	14166	4246	94	4152	0.977862	ENST00000336577.9_2, ENST00000570755.1_1, ENST00000575441.1_1, ENST00000612971.1_1	MMP25	lncRNA, protein_coding, retained_intron	MMP25	0.2	0.41	0.42	0.25	0.36	0.32	0.16	0.22	0.48	14.0936	0.469417	0.780423	0.435142	0.620068	14.0936	0.144207	0.238966	0.811132	0.999983
ENSG00000008517.16_5	35	27	[ENST00000008180.13_1, ENST00000325568.9_2, ENST00000382213.7_1, ENST00000396887.7_2, ENST00000396890.6_2, ENST00000440815.7_3, ENST00000444393.7_2, ENST00000525003.1_1, ENST00000525228.5_5, ENST00000525377.6_1, ENST00000525643.6_2, ENST00000526464.6_2, ENST00000528163.6_2, ENST00000528652.2_1, ENST00000529550.5_2, ENST00000529699.5_1, ENST00000530538.6_3, ENST00000530890.5_1, ENST00000531965.5_1…	chr16:3115297-3132193	+	-	4	16896	3209	597	2612	0.813961	ENST00000008180.13_1, ENST00000325568.9_2, ENST00000382213.7_1, ENST00000396887.7_2, ENST00000396890.6_2, ENST00000440815.7_3, ENST00000444393.7_2, ENST00000516752.1, ENST00000525003.1_1, ENST00000525228.5_5, ENST00000525377.6_1, ENST00000525643.6_2, ENST00000526464.6_2, ENST00000528163.6_2, ENST00000528652.2_1, ENST00000529550.5_2, ENST00000529699.5_1, ENST00000530538.6_3, ENST00000530890.5_1, E…	IL32, RNU1-125P	protein_coding, retained_intron, snRNA	IL32	0.44	1.87	0.88	0.71	0.36	0	0.73	0.95	0.39	5.43756	0.817905	0.83231	0.405234	NA	5.43756	-0.962503	-0.907802	0.363983	0.999983
ENSG00000008710.19_3	40	39	[ENST00000262304.8_1, ENST00000415938.7_1, ENST00000423118.5_1, ENST00000468674.5_1, ENST00000469241.2_1, ENST00000469851.1_1, ENST00000471603.6_1, ENST00000472577.1_1, ENST00000472659.1_1, ENST00000473780.2_1, ENST00000474088.1_1, ENST00000475889.1_1, ENST00000480227.5_1, ENST00000483024.1_1, ENST00000483558.5_1, ENST00000483731.5_1, ENST00000483814.1_1, ENST00000485120.1_1, ENST00000486339.6_1,…	chr16:2138710-2185899	-	-	39	47189	18532	1092	17440	0.941075	ENST00000262304.8_1, ENST00000415938.7_1, ENST00000423118.5_1, ENST00000468674.5_1, ENST00000469241.2_1, ENST00000469851.1_1, ENST00000471603.6_1, ENST00000472577.1_1, ENST00000472659.1_1, ENST00000473780.2_1, ENST00000474088.1_1, ENST00000475889.1_1, ENST00000480227.5_1, ENST00000483024.1_1, ENST00000483558.5_1, ENST00000483731.5_1, ENST00000483814.1_1, ENST00000485120.1_1, ENST00000486339.6_1, …	PKD1	lncRNA, nonsense_mediated_decay, protein_coding, retained_intron	PKD1	11.81	12.33	12.11	13.2	12.25	13.17	13.46	15.01	17.63	293.452	-0.122211	-0.680591	0.49613	0.670485	293.452	-0.229046	-1.28029	0.200442	0.96277
ENSG00000008735.14_3	2	2	[ENST00000008876.7_1, ENST00000329492.6_2]	chr22:51039221-51052409	+	-	13	13188	5792	369	5423	0.936291	ENST00000008876.7_1, ENST00000329492.6_2	MAPK8IP2	protein_coding, retained_intron	MAPK8IP2	1.17	0.9	1.11	0.44	0.6	0.9	0.47	0.67	0.48	55.8042	1.21908	3.7596	0.000170188	0.00221887	55.8042	0.292149	0.877617	0.380152	0.999983
ENSG00000008838.20_5	34	28	[ENST00000356271.7_1, ENST00000394126.5_1, ENST00000394127.6_1, ENST00000394128.7_3, ENST00000422942.6_1, ENST00000428757.6_1, ENST00000470126.1_1, ENST00000479829.5_1, ENST00000491466.5_1, ENST00000492176.2_1, ENST00000495586.1_1, ENST00000501516.7_3, ENST00000535071.6_1, ENST00000535508.6_1, ENST00000537674.6_1, ENST00000543759.6_1, ENST00000577488.5_1, ENST00000578161.2_1, ENST00000578901.1_1,…	chr17:38175349-38217468	-	-	28	42119	6962	511	6451	0.926601	ENST00000356271.7_1, ENST00000394126.5_1, ENST00000394127.6_1, ENST00000394128.7_3, ENST00000422942.6_1, ENST00000428757.6_1, ENST00000470126.1_1, ENST00000479829.5_1, ENST00000491466.5_1, ENST00000492176.2_1, ENST00000495586.1_1, ENST00000501516.7_3, ENST00000535071.6_1, ENST00000535508.6_1, ENST00000537674.6_1, ENST00000543759.6_1, ENST00000577488.5_1, ENST00000578161.2_1, ENST00000578901.1_1, …	MED24	lncRNA, nonsense_mediated_decay, protein_coding, retained_intron	MED24	20.83	16.4	17.09	16.6	18.92	19.07	19.91	24.38	18.53	562.949	0.0335413	0.226693	0.820663	0.89973	562.949	-0.166128	-1.12593	0.260195	0.999983
ENSG00000008853.16_2	8	8	[ENST00000251822.6_1, ENST00000517528.1_1, ENST00000518534.1_1, ENST00000519210.1_1, ENST00000519685.5_1, ENST00000522948.5_1, ENST00000523918.1_1, ENST00000524077.5_1]	chr8:22844929-22877712	+	-	16	32783	6580	0	6580	1	ENST00000251822.6_1, ENST00000517528.1_1, ENST00000518534.1_1, ENST00000519210.1_1, ENST00000519685.5_1, ENST00000522948.5_1, ENST00000523918.1_1, ENST00000524077.5_1	RHOBTB2	lncRNA, protein_coding, retained_intron	RHOBTB2	4.56	6.25	5.91	6.93	4.43	4.25	2.92	4.13	5.63	141.253	0.615964	2.07785	0.0377232	0.122953	141.253	0.326911	1.09312	0.274343	0.999983
ENSG00000008869.12_3	5	5	[ENST00000233099.6_2, ENST00000425467.5_2, ENST00000467978.1_1, ENST00000471051.1_1, ENST00000478810.1_1]	chr2:37195525-37311515	-	-	37	115990	8238	205	8033	0.975115	ENST00000233099.6_2, ENST00000425467.5_3, ENST00000467978.1_1, ENST00000471051.1_1, ENST00000478810.1_1	HEATR5B	protein_coding, retained_intron	HEATR5B	3.48	3.66	3.7	5.94	5.77	5.59	5.83	6.83	5.26	438.324	-0.488222	-3.87277	0.000107603	0.00156285	438.324	-0.0121863	-0.0989605	0.92117	0.999983
ENSG00000008952.17_3	10	10	[ENST00000337002.9_2, ENST00000460513.5_1, ENST00000461933.1_1, ENST00000469515.6_1, ENST00000469890.1_1, ENST00000470355.1_1, ENST00000480708.5_1, ENST00000481435.5_1, ENST00000487736.5_1, ENST00000497277.1_1]	chr3:169684422-169716161	+	-	11	31739	7928	1886	6042	0.762109	ENST00000337002.9_2, ENST00000460513.5_1, ENST00000461933.1_1, ENST00000469515.6_1, ENST00000469890.1_1, ENST00000470355.1_1, ENST00000480708.5_1, ENST00000481435.5_1, ENST00000487736.5_1, ENST00000497277.1_1	SEC62	lncRNA, nonsense_mediated_decay, protein_coding, retained_intron	SEC62	14.75	24.77	21.9	33.32	33.12	32.78	31.1	38.33	26.14	200.606	-0.415749	-2.19607	0.0280867	0.0994128	200.606	0.0919514	0.498267	0.618296	0.999983
ENSG00000008988.9_2	12	7	[ENST00000009589.7_1, ENST00000518875.5_1, ENST00000519369.1_1, ENST00000519606.5_1, ENST00000519807.5_1, ENST00000520490.1_1, ENST00000520627.1_1, ENST00000521262.5_1, ENST00000521289.5_1, ENST00000523936.5_1, ENST00000524349.5_1, ENST00000618656.1_1]	chr8:56979853-56987140	-	-	3	7287	3002	1234	1768	0.588941	ENST00000009589.7_1, ENST00000459159.1, ENST00000518875.5_1, ENST00000519369.1_1, ENST00000519606.5_1, ENST00000519807.5_1, ENST00000520490.1_1, ENST00000520627.1_1, ENST00000521262.5_1, ENST00000521289.5_1, ENST00000523936.5_1, ENST00000524349.5_1, ENST00000618656.1_1	RPS20, SNORD54	lncRNA, protein_coding, retained_intron, snoRNA	RPS20	394.03	449.21	391.15	638.22	1425.34	924.5	923.16	1672.58	527.1	4856.5	-1.05702	-2.6832	0.00729223	0.0376287	4856.5	7.45595e-05	0.000189353	0.999849	1
ENSG00000009307.16_6	18	15	[ENST00000261443.9_2, ENST00000339438.10_2, ENST00000358528.9_3, ENST00000369530.5_2, ENST00000438362.6_2, ENST00000483030.1_1, ENST00000483407.1_1, ENST00000524652.1_1, ENST00000525132.1_5, ENST00000525878.5_5, ENST00000525970.5_5, ENST00000529046.5_4, ENST00000530784.1_1, ENST00000530886.5_1, ENST00000533818.5_1, ENST00000534389.2_3, ENST00000534699.5_2, ENST00000610726.4_2]	chr1:115259533-115301297	-	-	25	41764	5778	228	5550	0.96054	ENST00000261443.9_2, ENST00000339438.10_2, ENST00000358528.9_3, ENST00000369530.5_2, ENST00000438362.6_2, ENST00000483030.1_1, ENST00000483407.1_1, ENST00000524652.1_1, ENST00000525132.1_6, ENST00000525878.5_6, ENST00000525970.5_6, ENST00000529046.5_5, ENST00000530784.1_1, ENST00000530886.5_1, ENST00000533818.5_1, ENST00000534389.2_4, ENST00000534699.5_2, ENST00000610726.4_2	CSDE1	lncRNA, protein_coding, retained_intron	CSDE1	229.51	283.24	248.81	332.14	418.99	363	410.38	466.89	289.46	13018	-0.370379	-3.05234	0.00227067	0.0160755	13018	-0.0224383	-0.18506	0.853182	0.999983
ENSG00000009335.18_4	9	9	[ENST00000348165.10_2, ENST00000389103.4_1, ENST00000430750.1_1, ENST00000469336.1_1, ENST00000470408.5_1, ENST00000474153.1_1, ENST00000494532.1_1, ENST00000497368.1_1, ENST00000611269.4_1]	chr7:156931609-157062064	+	-	24	130455	9215	2390	6825	0.74064	ENST00000348165.10_2, ENST00000389103.4_1, ENST00000430750.1_1, ENST00000469336.1_1, ENST00000470408.5_1, ENST00000474153.1_1, ENST00000494532.1_1, ENST00000497368.1_1, ENST00000611269.4_1	UBE3C	nonsense_mediated_decay, protein_coding, retained_intron	UBE3C	12.24	17.75	14.9	18.41	19.55	18.27	17.17	19.41	15.77	1066.23	0.00546754	0.0452037	0.963945	0.980451	1066.23	0.138461	1.14948	0.250358	0.999983
ENSG00000009413.15_4	14	12	[ENST00000358835.7_3, ENST00000368802.7_3, ENST00000368805.5_3, ENST00000413831.1_1, ENST00000422377.5_1, ENST00000434009.5_1, ENST00000435970.5_3, ENST00000460981.1_1, ENST00000462119.5_1, ENST00000467500.1_1, ENST00000470871.1_1, ENST00000492520.1_1, ENST00000494858.1_1, ENST00000619481.1_1]	chr6:111620230-111804918	-	-	37	184688	12425	530	11895	0.957344	ENST00000358835.7_3, ENST00000368802.7_3, ENST00000368805.5_3, ENST00000413831.1_1, ENST00000422377.5_1, ENST00000434009.5_1, ENST00000435970.5_3, ENST00000460981.1_1, ENST00000462119.5_1, ENST00000467500.1_1, ENST00000470871.1_1, ENST00000492520.1_1, ENST00000494858.1_1, ENST00000619481.1_1	REV3L	lncRNA, nonsense_mediated_decay, protein_coding, retained_intron	REV3L	4.88	7.88	7.68	9.2	11.68	10.4	8.57	11.38	7.93	636.226	-0.218519	-1.35593	0.175122	0.343045	636.226	0.204994	1.28337	0.199363	0.96277
ENSG00000009694.13_5	3	2	[ENST00000371130.7_4, ENST00000422452.2_4, ENST00000461429.1_1]	chrX:123509752-124097666	-	-	32	587914	12896	0	12896	1	ENST00000371130.7_4, ENST00000422452.2_4, ENST00000461429.1_1	TENM1	lncRNA, protein_coding	TENM1	0	0	0.01	0	0.01	0.01	0.01	0.01	0	0.498444	-0.91864	-0.335976	0.736889	NA	0.498444	-0.549091	-0.205109	0.837487	NA
ENSG00000009709.12_3	3	3	[ENST00000375375.7_1, ENST00000400661.3_1, ENST00000420770.7_2]	chr1:18957339-19075360	+	-	9	118021	6473	212	6261	0.967249	ENST00000375375.7_1, ENST00000400661.3_1, ENST00000420770.7_2	PAX7	protein_coding	PAX7	0	0	0	0	0	0	0	0	0
ENSG00000009724.16_2	4	4	[ENST00000400897.7_1, ENST00000400898.3_1, ENST00000478645.1_1, ENST00000480221.1_1]	chr1:11086579-11107290	-	-	10	20711	4251	614	3637	0.855563	ENST00000400897.7_1, ENST00000400898.3_1, ENST00000478645.1_1, ENST00000480221.1_1	MASP2	protein_coding, retained_intron	MASP2	0	0	0	0	0	0	0	0	0
ENSG00000009765.14_2	9	6	[ENST00000229447.9_1, ENST00000344419.7_1, ENST00000367335.7_1, ENST00000392255.7_1, ENST00000392256.6_1, ENST00000422583.2_1, ENST00000425615.3_1, ENST00000500320.7_1, ENST00000546121.1_1]	chr6:150690027-150727105	+	-	7	37078	10362	3264	7098	0.685003	ENST00000229447.9_1, ENST00000344419.7_1, ENST00000367335.7_1, ENST00000392255.7_1, ENST00000392256.6_1, ENST00000422583.2_1, ENST00000425615.3_1, ENST00000500320.7_1, ENST00000546121.1_1	IYD	nonsense_mediated_decay, protein_coding, retained_intron	IYD	0	0.02	0.17	0.02	0.18	0.01	0.01	0	0	2.10136	2.97476	1.49554	0.134772	NA	2.10136	2.91704	1.49559	0.134759	NA
ENSG00000009780.15_4	7	5	[ENST00000010299.10_1, ENST00000234549.11_1, ENST00000373949.5_1, ENST00000373954.10_2, ENST00000419687.6_1, ENST00000446647.1_1, ENST00000530324.5_2]	chr1:28052489-28089633	+	-	11	37144	4034	518	3516	0.871591	ENST00000010299.10_1, ENST00000234549.11_1, ENST00000373949.5_1, ENST00000373954.10_2, ENST00000419687.6_1, ENST00000446647.1_1, ENST00000530324.5_2	FAM76A	protein_coding	FAM76A	1.34	1.58	1.85	1.1	3.15	1.61	1.75	2.7	1.44	30.2724	-0.0468715	-0.109237	0.913015	0.952116	30.2724	0.0373807	0.0880043	0.929873	0.999983
ENSG00000009790.15_6	16	14	[ENST00000367023.5_3, ENST00000367024.5_3, ENST00000367025.8_4, ENST00000367026.7_4, ENST00000400959.7_3, ENST00000460314.1_1, ENST00000467830.1_1, ENST00000468672.5_1, ENST00000471368.1_1, ENST00000474496.5_1, ENST00000476050.5_1, ENST00000477431.1_3, ENST00000478359.5_1, ENST00000479796.5_3, ENST00000487271.5_2, ENST00000488702.1_1]	chr1:209929376-209955665	+	-	15	26289	7750	1407	6343	0.818452	ENST00000367023.5_3, ENST00000367024.5_3, ENST00000367025.8_4, ENST00000367026.7_4, ENST00000400959.7_3, ENST00000460314.1_1, ENST00000467830.1_1, ENST00000468672.5_1, ENST00000471368.1_1, ENST00000474496.5_1, ENST00000476050.5_1, ENST00000477431.1_3, ENST00000478359.5_1, ENST00000479796.5_3, ENST00000487271.5_2, ENST00000488702.1_1	TRAF3IP3	lncRNA, nonsense_mediated_decay, protein_coding, retained_intron	TRAF3IP3	0	0	0	0	0	0	0	0	0
ENSG00000009830.11_6	23	23	[ENST00000261534.8_1, ENST00000452340.7_1, ENST00000553863.5_1, ENST00000553880.5_1, ENST00000554564.1_1, ENST00000554767.5_1, ENST00000554884.5_1, ENST00000554948.1_2, ENST00000555134.1_1, ENST00000555675.5_1, ENST00000555710.1_4, ENST00000555788.5_1, ENST00000556171.1_4, ENST00000556326.5_1, ENST00000556394.1_3, ENST00000556404.1_1, ENST00000556446.1_1, ENST00000556851.1_1, ENST00000556880.5_1,…	chr14:77741298-77787227	-	-	26	45929	10008	1834	8174	0.816747	ENST00000261534.8_1, ENST00000452340.7_1, ENST00000553863.5_1, ENST00000553880.5_1, ENST00000554564.1_1, ENST00000554767.5_1, ENST00000554884.5_1, ENST00000554948.1_3, ENST00000555134.1_1, ENST00000555675.5_1, ENST00000555710.1_5, ENST00000555788.5_1, ENST00000556171.1_5, ENST00000556326.5_1, ENST00000556394.1_3, ENST00000556404.1_1, ENST00000556446.1_1, ENST00000556851.1_1, ENST00000556880.5_1, …	POMT2	lncRNA, non_stop_decay, nonsense_mediated_decay, protein_coding, retained_intron	POMT2	39.17	37.07	29.74	29.18	37.26	41.39	28	34.05	35.56	368.897	0.346438	1.82416	0.0681276	0.184393	368.897	0.161484	0.849419	0.395648	0.999983
ENSG00000009844.16_4	5	4	[ENST00000367621.1_1, ENST00000367630.9_3, ENST00000452973.6_1, ENST00000491881.1_1, ENST00000620996.4_2]	chr6:142468298-142545822	+	-	8	77524	7258	2385	4873	0.671397	ENST00000367621.1_1, ENST00000367630.9_3, ENST00000452973.6_1, ENST00000491881.1_1, ENST00000620996.4_2	VTA1	lncRNA, protein_coding	VTA1	60.19	67.87	57.82	85.38	88.08	85.8	96.31	95.65	82.09	1400.85	-0.327894	-3.06971	0.00214267	0.0153719	1400.85	-0.046562	-0.439315	0.660434	0.999983
ENSG00000009950.16_5	11	9	[ENST00000313375.8_2, ENST00000345114.9_1, ENST00000354613.5_1, ENST00000414749.6_1, ENST00000429400.6_1, ENST00000434326.5_2, ENST00000453275.1_1, ENST00000456640.1_1, ENST00000467221.1_1, ENST00000476404.5_1, ENST00000488212.1_1]	chr7:73007523-73038873	-	-	14	31350	4815	484	4331	0.899481	ENST00000313375.8_2, ENST00000345114.9_1, ENST00000354613.5_1, ENST00000414749.6_1, ENST00000429400.6_1, ENST00000434326.5_2, ENST00000453275.1_1, ENST00000456640.1_1, ENST00000467221.1_1, ENST00000476404.5_1, ENST00000488212.1_1	MLXIPL	nonsense_mediated_decay, protein_coding, retained_intron	MLXIPL	2.11	2.06	1.75	1.77	1.26	2.23	1.24	1.63	0.79	45.009	0.963127	2.71707	0.00658634	0.0348715	45.009	0.597709	1.67119	0.0946835	0.819046
ENSG00000009954.11_3	3	3	[ENST00000339594.9_2, ENST00000404251.1_1, ENST00000466844.1_1]	chr7:72854735-72936623	-	-	19	81888	7060	0	7060	1	ENST00000339594.9_2, ENST00000404251.1_1, ENST00000466844.1_1	BAZ1B	protein_coding, retained_intron	BAZ1B	14.83	18.25	16.71	24.05	28.2	25.79	28.1	31.3	23.99	1691.87	-0.510002	-5.48841	4.05574e-08	2.30568e-06	1691.87	-0.0601055	-0.654739	0.512636	0.999983
ENSG00000010017.13_3	2	2	[ENST00000011619.6_2, ENST00000469916.1_1]	chr6:13621729-13712067	-	-	14	90338	3618	0	3618	1	ENST00000011619.6_2, ENST00000469916.1_1	RANBP9	lncRNA, protein_coding	RANBP9	26.43	29.09	27.83	38.41	41.06	35.16	35.03	44.59	30.88	756.556	-0.165658	-1.38377	0.166428	0.331903	756.556	0.0940584	0.79698	0.425463	0.999983
ENSG00000010030.14_4	8	5	[ENST00000339796.9_1, ENST00000340181.9_2, ENST00000373737.8_1, ENST00000373738.4_1, ENST00000538992.3_1, ENST00000615781.4_2, ENST00000620358.4_1, ENST00000627426.2_1]	chr6:36321867-36355577	-	-	9	33710	2374	597	1777	0.748526	ENST00000339796.9_1, ENST00000340181.9_2, ENST00000373737.8_1, ENST00000373738.4_1, ENST00000538992.3_1, ENST00000615781.4_2, ENST00000620358.4_1, ENST00000627426.2_1	ETV7	protein_coding	ETV7	0	0.07	0	0	0	0.06	0	0	0.08	0.4148	0.0511366	0.0140745	0.988771	NA	0.4148	-0.199189	-0.054824	0.956279	NA
ENSG00000010072.16_4	6	6	[ENST00000008440.9_1, ENST00000295050.12_3, ENST00000366644.3_1, ENST00000391858.8_2, ENST00000469904.1_1, ENST00000492437.1_1]	chr1:231472849-231490769	+	-	6	17920	5906	517	5389	0.912462	ENST00000008440.9_1, ENST00000295050.12_3, ENST00000366644.3_1, ENST00000391858.8_2, ENST00000469904.1_1, ENST00000492437.1_1	SPRTN	lncRNA, protein_coding	SPRTN	4.19	4.14	4.82	5.46	8.14	6.64	5.17	8.57	4.22	137.705	-0.194382	-0.823404	0.410278	0.598189	137.705	0.220336	0.955438	0.339356	0.999983
ENSG00000010165.20_4	7	7	[ENST00000361735.4_2, ENST00000362019.7_1, ENST00000367737.9_1, ENST00000466643.1_1, ENST00000476386.1_1, ENST00000478330.1_1, ENST00000485629.1_1]	chr1:171750799-171783163	+	-	9	32364	3831	85	3746	0.977813	ENST00000361735.4_2, ENST00000362019.7_1, ENST00000367737.9_1, ENST00000466643.1_1, ENST00000476386.1_1, ENST00000478330.1_1, ENST00000485629.1_1	EEF1AKNMT	lncRNA, protein_coding	METTL13	6.63	8.78	8.59	7.38	10.96	8.1	10.49	10.43	7.57	240.662	-0.0147314	-0.0818014	0.934805	0.962796	240.662	-0.0764557	-0.430877	0.666558	0.999983
ENSG00000010219.13_4	17	17	[ENST00000010132.6_1, ENST00000536137.1_1, ENST00000536157.5_1, ENST00000536645.1_1, ENST00000537719.5_1, ENST00000538520.5_1, ENST00000539309.5_1, ENST00000539490.1_1, ENST00000539701.5_1, ENST00000540644.1_1, ENST00000540757.6_1, ENST00000541024.1_1, ENST00000542905.1_1, ENST00000543431.5_1, ENST00000544050.1_1, ENST00000544671.1_2, ENST00000545571.5_1]	chr12:4671369-4724468	+	-	23	53099	7054	1092	5962	0.845194	ENST00000010132.6_1, ENST00000536137.1_1, ENST00000536157.5_1, ENST00000536588.1_4, ENST00000536645.1_1, ENST00000537719.5_1, ENST00000538520.5_1, ENST00000539309.5_1, ENST00000539490.1_1, ENST00000539701.5_1, ENST00000540644.1_1, ENST00000540757.6_1, ENST00000541024.1_1, ENST00000542905.1_1, ENST00000543431.5_1, ENST00000544050.1_1, ENST00000544671.1_3, ENST00000545571.5_1	AC005832.4, DYRK4	lncRNA, nonsense_mediated_decay, protein_coding, retained_intron	NDUFA9, DYRK4	13	16.18	19.42	26.75	17	21.75	26.61	20.16	24.79	119.651	-0.341922	-1.27743	0.201449	0.378174	119.651	-0.0983095	-0.372121	0.709803	0.999983
ENSG00000010244.18_5	17	17	[ENST00000321233.10_3, ENST00000342555.10_1, ENST00000394670.8_1, ENST00000394673.6_3, ENST00000394679.9_3, ENST00000577324.1_1, ENST00000577908.5_1, ENST00000578918.1_3, ENST00000579416.1_1, ENST00000579634.5_2, ENST00000579810.2_1, ENST00000580759.5_2, ENST00000581531.5_2, ENST00000582165.1_3, ENST00000582705.1_1, ENST00000584416.1_1, ENST00000584696.1_1]	chr17:30677135-30708905	+	-	14	31770	15834	1618	14216	0.897815	ENST00000321233.10_3, ENST00000342555.10_1, ENST00000385193.1, ENST00000394670.8_1, ENST00000394673.6_3, ENST00000394679.9_4, ENST00000577324.1_1, ENST00000577908.5_1, ENST00000578389.1_1, ENST00000578918.1_4, ENST00000579416.1_1, ENST00000579634.5_3, ENST00000579810.2_1, ENST00000580759.5_3, ENST00000581531.5_3, ENST00000581915.5_1, ENST00000582165.1_4, ENST00000582705.1_1, ENST00000584416.1_1, …	AC005899.4, MIR632, ZNF207	lncRNA, miRNA, nonsense_mediated_decay, protein_coding, retained_intron	ZNF207	449.51	479.8	462.49	463.85	378.18	405.85	516.8	363.52	412.21	4864.17	0.326186	1.94834	0.0513744	0.151932	4864.17	-0.0238807	-0.142662	0.886557	0.999983
ENSG00000010256.11_3	10	10	[ENST00000203407.6_2, ENST00000412343.5_1, ENST00000415995.5_1, ENST00000460105.1_1, ENST00000463708.1_1, ENST00000467690.5_1, ENST00000471189.5_1, ENST00000472438.5_1, ENST00000480561.5_1, ENST00000493806.1_1]	chr3:48636434-48648409	-	-	11	11975	3204	157	3047	0.950999	ENST00000203407.6_2, ENST00000412343.5_1, ENST00000415995.5_1, ENST00000460105.1_1, ENST00000463708.1_1, ENST00000467690.5_1, ENST00000471189.5_1, ENST00000472438.5_1, ENST00000480561.5_1, ENST00000493806.1_1	UQCRC1	lncRNA, nonsense_mediated_decay, protein_coding, retained_intron	UQCRC1	41.62	35.85	38.66	38.46	48.22	46.64	49.93	52.94	34.05	511.628	0.0091794	0.0602858	0.951928	0.97303	511.628	8.21353e-06	5.40276e-05	0.999957	1
ENSG00000010270.13_3	7	7	[ENST00000009041.11_1, ENST00000396013.5_1, ENST00000429075.1_1, ENST00000434197.5_2, ENST00000440144.5_1, ENST00000453225.5_1, ENST00000471550.1_1]	chr7:38217823-38270272	+	-	11	52449	4348	432	3916	0.900644	ENST00000009041.11_1, ENST00000396013.5_1, ENST00000429075.1_1, ENST00000434197.5_2, ENST00000440144.5_1, ENST00000453225.5_1, ENST00000471550.1_1	STARD3NL	protein_coding, retained_intron	STARD3NL	4.69	6.39	6.06	6.27	7.52	8.26	8.18	10.19	5.01	103.473	-0.208769	-0.862765	0.388267	0.577928	103.473	-0.0399398	-0.167566	0.866925	0.999983
ENSG00000010278.14_5	16	15	[ENST00000009180.10_3, ENST00000382515.7_3, ENST00000382518.6_2, ENST00000382519.9_2, ENST00000481267.6_2, ENST00000536586.6_2, ENST00000538418.1_1, ENST00000538834.6_2, ENST00000540891.1_1, ENST00000543916.5_1, ENST00000546073.6_2, ENST00000610354.4_1, ENST00000642746.1_1, ENST00000645368.1_1, ENST00000645565.1_1, ENST00000646407.1_1]	chr12:6308880-6347437	+	-	14	38557	4165	316	3849	0.92413	ENST00000009180.10_3, ENST00000382515.7_3, ENST00000382518.6_2, ENST00000382519.9_2, ENST00000481267.6_2, ENST00000536586.6_2, ENST00000538418.1_1, ENST00000538834.6_2, ENST00000540891.1_1, ENST00000543916.5_1, ENST00000546073.6_2, ENST00000610354.4_1, ENST00000642746.1_1, ENST00000645368.1_1, ENST00000645565.1_1, ENST00000646407.1_1	CD9	lncRNA, protein_coding, retained_intron	CD9	1052.15	1178.36	1142.14	1406.03	1301.44	1392.56	1681.77	1595.8	1484.97	11410.7	-0.2709	-2.53661	0.0111932	0.0512144	11410.7	-0.18413	-1.72535	0.0844643	0.788399
ENSG00000010282.14_5	12	10	[ENST00000310417.9_1, ENST00000416756.5_4, ENST00000417472.5_2, ENST00000426666.5_1, ENST00000441594.5_1, ENST00000442469.1_2, ENST00000455195.5_1, ENST00000457462.5_4, ENST00000466007.1_1, ENST00000480939.1_1, ENST00000490003.5_1, ENST00000497000.1_1]	chr3:42734154-42744319	-	-	13	10165	2891	247	2644	0.914562	ENST00000310417.9_1, ENST00000416756.5_5, ENST00000417472.5_3, ENST00000426666.5_1, ENST00000441594.5_1, ENST00000442469.1_3, ENST00000455195.5_1, ENST00000457462.5_5, ENST00000466007.1_1, ENST00000479631.5_2, ENST00000480939.1_1, ENST00000490003.5_1, ENST00000496027.5_2, ENST00000497000.1_1	AC006059.3, HHATL	lncRNA, protein_coding, retained_intron	HHATL, CCDC13	0	0	0.22	0.09	0	0	0	0	0	0.320633	1.3871	0.339932	0.733907	NA	0.320633	0.735026	0.180133	0.857048	NA
ENSG00000010292.13_4	13	13	[ENST00000315579.10_2, ENST00000382457.8_2, ENST00000535804.1_1, ENST00000536090.1_1, ENST00000536538.1_1, ENST00000538600.1_1, ENST00000539084.5_1, ENST00000539714.5_1, ENST00000539885.1_1, ENST00000541399.1_1, ENST00000542472.1_1, ENST00000542492.1_1, ENST00000545732.1_1]	chr12:6602521-6641121	+	-	32	38600	6470	575	5895	0.911128	ENST00000315579.10_2, ENST00000382457.8_2, ENST00000535804.1_1, ENST00000536090.1_1, ENST00000536538.1_1, ENST00000538600.1_1, ENST00000539084.5_1, ENST00000539714.5_1, ENST00000539885.1_1, ENST00000541399.1_1, ENST00000542472.1_1, ENST00000542492.1_1, ENST00000545732.1_1	NCAPD2	lncRNA, nonsense_mediated_decay, protein_coding, retained_intron	NCAPD2	49.54	59.68	56.07	57.13	65.6	63.6	69.67	78.53	56.47	1790.64	-0.0708941	-0.746758	0.45521	0.636891	1790.64	-0.0967792	-1.02501	0.305357	0.999983
ENSG00000010295.19_4	12	8	[ENST00000336604.8_3, ENST00000356896.8_3, ENST00000396830.2_1, ENST00000396840.6_3, ENST00000436152.6_2, ENST00000465801.5_2, ENST00000471408.5_1, ENST00000472558.6_1, ENST00000487279.6_1, ENST00000488007.5_1, ENST00000615885.4_2, ENST00000619571.4_3]	chr12:6647540-6665249	-	-	12	17709	5203	666	4537	0.871997	ENST00000336604.8_3, ENST00000356896.8_3, ENST00000396830.2_1, ENST00000396840.6_3, ENST00000436152.6_2, ENST00000465801.5_2, ENST00000471408.5_1, ENST00000472558.6_1, ENST00000487279.6_1, ENST00000488007.5_1, ENST00000615885.4_2, ENST00000619571.4_3	IFFO1	nonsense_mediated_decay, protein_coding, retained_intron	IFFO1	0.08	0.15	0.06	0.05	0.03	0.06	0.06	0	0.07	1.99679	1.3928	0.987069	0.323609	NA	1.99679	0.158363	0.104492	0.916779	NA
ENSG00000010310.9_5	9	7	[ENST00000263281.7_1, ENST00000304207.12_2, ENST00000585889.1_1, ENST00000588816.1_1, ENST00000590918.6_2, ENST00000591224.1_1, ENST00000591322.1_1, ENST00000593127.1_1, ENST00000652180.1_1]	chr19:46171478-46186980	+	-	15	15502	5069	1656	3413	0.673308	ENST00000263281.7_1, ENST00000304207.12_2, ENST00000585889.1_1, ENST00000588816.1_1, ENST00000590918.6_2, ENST00000591224.1_1, ENST00000591322.1_1, ENST00000593127.1_1, ENST00000652180.1_1	GIPR	lncRNA, nonsense_mediated_decay, protein_coding, retained_intron	GIPR	0.27	0.19	0.06	0.06	0.13	0.24	0	0	0.23	2.54311	1.55669	0.989444	0.322446	NA	2.54311	1.01849	0.636818	0.524244	NA
ENSG00000010318.21_4	11	11	[ENST00000327906.8_2, ENST00000347025.6_1, ENST00000459935.1_1, ENST00000461861.5_1, ENST00000465863.1_1, ENST00000472337.5_1, ENST00000473145.5_1, ENST00000482327.5_1, ENST00000498509.2_1, ENST00000614886.4_1, ENST00000615126.1_1]	chr3:52444675-52457657	+	-	9	12982	3364	118	3246	0.964923	ENST00000327906.8_2, ENST00000347025.6_1, ENST00000459935.1_1, ENST00000461861.5_1, ENST00000465863.1_1, ENST00000472337.5_1, ENST00000473145.5_1, ENST00000482327.5_1, ENST00000498509.2_1, ENST00000614886.4_1, ENST00000615126.1_1	PHF7	lncRNA, protein_coding, retained_intron	PHF7	1.61	0.92	1.2	1	1.94	1.26	1.08	2.83	1.05	15.8542	-0.100468	-0.178929	0.857994	0.921137	15.8542	-0.166418	-0.299548	0.764522	0.999983
ENSG00000010319.6_3	3	3	[ENST00000231721.6_1, ENST00000465657.1_2, ENST00000475739.1_3]	chr3:52467068-52479101	-	-	17	12033	5011	0	5011	1	ENST00000231721.6_1, ENST00000465657.1_2, ENST00000475739.1_3	SEMA3G	nonsense_mediated_decay, protein_coding	SEMA3G	0	0	0	0	0.15	0.15	0.02	0.02	0	0.963663	-0.762959	-0.297744	0.765898	NA	0.963663	2.84821	1.20641	0.227659	NA
ENSG00000010322.16_4	14	12	[ENST00000345716.9_2, ENST00000420808.2_1, ENST00000460759.1_1, ENST00000464280.5_1, ENST00000467594.1_1, ENST00000474188.1_1, ENST00000479054.5_1, ENST00000481211.1_1, ENST00000485765.5_1, ENST00000488157.5_1, ENST00000488243.1_1, ENST00000488380.5_2, ENST00000489895.5_1, ENST00000490425.1_1]	chr3:52489133-52527084	+	-	23	37951	9062	505	8557	0.944273	ENST00000345716.9_2, ENST00000420808.2_1, ENST00000460759.1_1, ENST00000464280.5_1, ENST00000467594.1_1, ENST00000474188.1_1, ENST00000479054.5_1, ENST00000481211.1_1, ENST00000485765.5_1, ENST00000488157.5_1, ENST00000488243.1_1, ENST00000488380.5_2, ENST00000489895.5_1, ENST00000490425.1_1	NISCH	lncRNA, protein_coding, retained_intron	NISCH	7.18	7.6	8.32	9.09	6.43	7.28	8.09	9.47	6.58	290.64	0.17868	0.984329	0.324954	0.517348	290.64	-0.0421348	-0.231346	0.817046	0.999983
ENSG00000010327.10_3	9	9	[ENST00000321725.10_2, ENST00000461325.1_1, ENST00000462681.1_1, ENST00000462741.5_1, ENST00000469989.1_1, ENST00000479355.1_1, ENST00000481607.1_1, ENST00000481626.5_1, ENST00000484850.1_1]	chr3:52529353-52558511	+	-	56	29158	10588	231	10357	0.978183	ENST00000321725.10_2, ENST00000461325.1_1, ENST00000462681.1_1, ENST00000462741.5_1, ENST00000469989.1_1, ENST00000479355.1_1, ENST00000481607.1_1, ENST00000481626.5_1, ENST00000484850.1_1	STAB1	protein_coding, retained_intron	STAB1	0.03	0	0.03	0	0	0	0	0	0	0.232335	1.70991	0.425948	0.670146	NA	0.232335	0	0	1	NA
ENSG00000010361.13_4	18	17	[ENST00000313777.8_2, ENST00000377092.8_1, ENST00000525130.5_1, ENST00000525370.5_1, ENST00000525800.5_1, ENST00000526435.1_1, ENST00000526575.1_1, ENST00000527111.2_1, ENST00000527585.5_1, ENST00000527973.1_1, ENST00000528043.5_1, ENST00000528094.5_2, ENST00000529302.1_2, ENST00000529634.2_3, ENST00000531017.5_1, ENST00000533418.5_2, ENST00000534008.5_1, ENST00000534138.1_1]	chr19:50310125-50320633	-	-	14	10508	2950	222	2728	0.924746	ENST00000313777.8_2, ENST00000377092.8_1, ENST00000525130.5_1, ENST00000525370.5_1, ENST00000525800.5_1, ENST00000526435.1_1, ENST00000526575.1_1, ENST00000527111.2_1, ENST00000527585.5_1, ENST00000527973.1_1, ENST00000528043.5_1, ENST00000528094.5_2, ENST00000529302.1_2, ENST00000529634.2_3, ENST00000531017.5_1, ENST00000533418.5_2, ENST00000534008.5_1, ENST00000534138.1_1	FUZ	lncRNA, nonsense_mediated_decay, protein_coding, retained_intron	FUZ	4.91	4.68	3.96	3.69	4.26	3.18	5.42	2.93	7.55	46.8809	-0.0129989	-0.0327987	0.973835	0.985839	46.8809	-0.504306	-1.25044	0.211138	0.967828
ENSG00000010379.16_4	12	8	[ENST00000343164.9_2, ENST00000436453.1_1, ENST00000445055.6_1, ENST00000534887.1_1, ENST00000536842.5_1, ENST00000539260.1_1, ENST00000539668.1_1, ENST00000542272.5_1, ENST00000542379.1_1, ENST00000542947.1_1, ENST00000543722.1_1, ENST00000546319.5_1]	chr12:329786-372039	-	-	16	42253	4243	323	3920	0.923875	ENST00000343164.9_2, ENST00000436453.1_1, ENST00000445055.6_1, ENST00000534887.1_1, ENST00000536842.5_1, ENST00000539260.1_1, ENST00000539668.1_1, ENST00000542272.5_1, ENST00000542379.1_1, ENST00000542947.1_1, ENST00000543722.1_1, ENST00000546319.5_1	SLC6A13	lncRNA, nonsense_mediated_decay, protein_coding, retained_intron	SLC6A13	0.12	0	0	0	0.07	0	0	0	0	0.238347	1.33328	0.329494	0.741782	NA	0.238347	0.67482	0.165378	0.868646	NA
ENSG00000010404.18_4	8	7	[ENST00000340855.11_3, ENST00000370441.8_2, ENST00000428056.6_1, ENST00000464251.5_1, ENST00000466019.1_1, ENST00000466323.5_1, ENST00000490775.5_1, ENST00000521702.1_1]	chrX:148558518-148602635	-	-	17	44117	9294	1867	7427	0.799118	ENST00000340855.11_3, ENST00000370438.2_1, ENST00000370441.8_2, ENST00000422081.6_1, ENST00000427113.2_1, ENST00000428056.6_1, ENST00000441880.1_1, ENST00000464251.5_1, ENST00000466019.1_1, ENST00000466323.5_1, ENST00000490775.5_1, ENST00000521702.1_1, ENST00000651111.1_1	AC244197.2, AC244197.3, IDS	lncRNA, nonsense_mediated_decay, protein_coding	IDS	86.82	104.35	90.29	89.02	78.67	84.92	82.24	74.7	83.22	2362.61	0.446528	3.16526	0.00154943	0.0118909	2362.61	0.0976384	0.69202	0.488924	0.999983
ENSG00000010438.16_4	8	8	[ENST00000342836.8_2, ENST00000361005.9_2, ENST00000379405.3_2, ENST00000429677.7_2, ENST00000457896.5_2, ENST00000468152.2_1, ENST00000477653.2_1, ENST00000495682.1_1]	chr9:33750463-33799229	+	-	9	48766	1664	0	1664	1	ENST00000342836.8_2, ENST00000361005.9_2, ENST00000379405.3_2, ENST00000429677.7_2, ENST00000457896.5_2, ENST00000468152.2_1, ENST00000477653.2_1, ENST00000495682.1_1	PRSS3	lncRNA, protein_coding	PRSS3	0	0	0	0	0	0.15	0	0	0
ENSG00000010539.11_5	10	10	[ENST00000396868.7_1, ENST00000396870.8_1, ENST00000396871.8_1, ENST00000414144.6_1, ENST00000431561.7_1, ENST00000575285.1_1, ENST00000575617.1_3, ENST00000575630.1_1, ENST00000575948.1_1, ENST00000577015.1_1]	chr16:3272324-3286221	-	-	6	13897	7498	2483	5015	0.668845	ENST00000396868.7_1, ENST00000396870.8_1, ENST00000396871.8_1, ENST00000414144.6_1, ENST00000431561.7_1, ENST00000575285.1_1, ENST00000575617.1_3, ENST00000575630.1_1, ENST00000575948.1_1, ENST00000577015.1_1	ZNF200	protein_coding, retained_intron	ZNF200	3.05	3.52	3.84	3.77	4.83	4.22	3.84	3.79	3.48	110.559	0.135666	0.661813	0.508091	0.679678	110.559	0.238097	1.183	0.236807	0.988917
ENSG00000010610.10_4	12	9	[ENST00000011653.9_2, ENST00000437800.6_1, ENST00000535466.5_1, ENST00000535707.5_1, ENST00000536563.1_1, ENST00000536590.1_1, ENST00000536610.5_1, ENST00000538827.5_1, ENST00000539492.1_3, ENST00000541982.5_1, ENST00000543755.1_1, ENST00000544344.5_1]	chr12:6896023-6929965	+	-	14	33942	4557	580	3977	0.872723	ENST00000011653.9_2, ENST00000437800.6_1, ENST00000535466.5_1, ENST00000535707.5_1, ENST00000536563.1_1, ENST00000536590.1_1, ENST00000536610.5_1, ENST00000538827.5_1, ENST00000539492.1_3, ENST00000541982.5_1, ENST00000543755.1_1, ENST00000544344.5_1	CD4	lncRNA, protein_coding, retained_intron	CD4	0	0.06	0	0	0	0.02	0	0	0	0.137371	0.81969	0.202338	0.839652	NA	0.137371	0.128918	0.0317515	0.97467	NA
ENSG00000010626.15_5	15	14	[ENST00000007969.12_2, ENST00000323702.9_2, ENST00000415834.5_1, ENST00000428946.5_1, ENST00000429740.1_1, ENST00000431207.5_1, ENST00000433346.5_1, ENST00000436789.5_1, ENST00000443597.7_3, ENST00000449039.5_1, ENST00000451681.5_1, ENST00000457146.5_1, ENST00000472633.1_1, ENST00000486401.1_1, ENST00000622489.4_1]	chr12:6982732-7023405	+	-	12	40673	3052	196	2856	0.93578	ENST00000007969.12_2, ENST00000274820.7_1, ENST00000323702.9_2, ENST00000412023.5_1, ENST00000415834.5_1, ENST00000421824.1_1, ENST00000428946.5_1, ENST00000429740.1_1, ENST00000431207.5_1, ENST00000433346.5_1, ENST00000436789.5_1, ENST00000443597.7_3, ENST00000449039.5_1, ENST00000451612.5_1, ENST00000451681.5_1, ENST00000457146.5_1, ENST00000472633.1_1, ENST00000486401.1_1, ENST00000622489.4_1	LRRC23, RPL13P5	lncRNA, nonsense_mediated_decay, protein_coding, retained_intron	LRRC23	4.3	4.8	3.87	6.9	4.89	6.39	8.74	7.31	6.69	65.668	-0.580902	-2.05868	0.0395246	0.127135	65.668	-0.295695	-1.06922	0.284972	0.999983
ENSG00000010671.15_2	10	10	[ENST00000308731.7_1, ENST00000372880.5_1, ENST00000464006.1_1, ENST00000464567.1_1, ENST00000470069.1_1, ENST00000470329.1_1, ENST00000478995.1_1, ENST00000488970.1_1, ENST00000618050.4_1, ENST00000621635.4_1]	chrX:100604434-100645784	-	-	21	41350	4575	229	4346	0.949945	ENST00000308731.7_1, ENST00000372880.5_1, ENST00000464006.1_1, ENST00000464567.1_1, ENST00000470069.1_1, ENST00000470329.1_1, ENST00000478995.1_1, ENST00000488970.1_1, ENST00000618050.4_1, ENST00000621635.4_1	BTK	lncRNA, protein_coding, retained_intron	BTK	0	0.04	0	0	0	0.05	0	0	0	0.181141	0.71661	0.175643	0.860574	NA	0.181141	0.874597	0.215707	0.829216	NA
ENSG00000010704.18_4	14	8	[ENST00000309234.10_1, ENST00000317896.11_1, ENST00000336625.12_1, ENST00000349999.8_1, ENST00000352392.8_1, ENST00000353147.9_1, ENST00000357618.9_1, ENST00000397022.7_3, ENST00000461397.5_2, ENST00000470149.5_1, ENST00000483782.1_1, ENST00000485729.1_1, ENST00000486147.1_1, ENST00000488199.5_1]	chr6:26087508-26098571	+	-	5	11063	5675	983	4692	0.826784	ENST00000309234.10_1, ENST00000317896.11_1, ENST00000336625.12_1, ENST00000349999.8_1, ENST00000352392.8_1, ENST00000353147.9_1, ENST00000357618.9_1, ENST00000397022.7_3, ENST00000461397.5_2, ENST00000470149.5_1, ENST00000483782.1_1, ENST00000485729.1_1, ENST00000486147.1_1, ENST00000488199.5_1	HFE	protein_coding, retained_intron	HFE	0.83	0.5	0.36	1.21	0.69	0.92	1.24	0.46	0.67	21.0541	-0.281245	-0.504051	0.614225	0.761972	21.0541	0.29647	0.543283	0.586935	0.999983
ENSG00000010803.16_4	17	14	[ENST00000326197.11_3, ENST00000337495.9_3, ENST00000361191.9_1, ENST00000361705.7_2, ENST00000372595.5_1, ENST00000372596.5_1, ENST00000372597.5_2, ENST00000397171.6_1, ENST00000397174.6_3, ENST00000402904.6_1, ENST00000456518.3_1, ENST00000460215.5_1, ENST00000472037.5_2, ENST00000482530.1_1, ENST00000488592.1_1, ENST00000489421.1_1, ENST00000498793.5_1]	chr1:41492871-41707826	-	-	21	214955	4447	736	3711	0.834495	ENST00000326197.11_3, ENST00000337495.9_3, ENST00000361191.9_1, ENST00000361705.7_2, ENST00000372595.5_1, ENST00000372596.5_1, ENST00000372597.5_2, ENST00000397171.6_1, ENST00000397174.6_3, ENST00000402904.6_1, ENST00000456518.3_1, ENST00000460215.5_1, ENST00000472037.5_3, ENST00000482530.1_1, ENST00000488592.1_1, ENST00000489421.1_1, ENST00000498793.5_1	SCMH1	lncRNA, protein_coding, retained_intron	SCMH1	45.7	43.8	50.68	50.91	41.45	45.03	57.26	38.6	51.97	555.939	0.140184	0.699142	0.484463	0.661294	555.939	-0.0839583	-0.418379	0.67567	0.999983
ENSG00000010810.17_6	29	29	[ENST00000229471.8_1, ENST00000354650.7_2, ENST00000368667.6_1, ENST00000368678.8_1, ENST00000368682.7_1, ENST00000462598.7_4, ENST00000462856.6_3, ENST00000467899.5_1, ENST00000467921.6_1, ENST00000471959.2_1, ENST00000476769.6_1, ENST00000484067.6_4, ENST00000487824.2_2, ENST00000491885.6_1, ENST00000495927.5_1, ENST00000495935.1_1, ENST00000496864.6_1, ENST00000517419.5_3, ENST00000518295.5_4,…	chr6:111981534-112194655	-	-	29	213121	7411	456	6955	0.93847	ENST00000229471.8_1, ENST00000354650.7_2, ENST00000368667.6_1, ENST00000368678.8_1, ENST00000368682.7_1, ENST00000462598.7_5, ENST00000462856.6_3, ENST00000467899.5_1, ENST00000467921.6_1, ENST00000471959.2_1, ENST00000476769.6_1, ENST00000484067.6_5, ENST00000487824.2_3, ENST00000491885.6_1, ENST00000495927.5_1, ENST00000495935.1_1, ENST00000496864.6_1, ENST00000517419.5_3, ENST00000518295.5_5, …	FYN	lncRNA, protein_coding, retained_intron	FYN	0.3	1.68	0.67	1.18	1	0.92	0.65	1.26	0.64	12.157	0.184849	0.276453	0.7822	0.876336	12.157	0.328976	0.488205	0.625405	0.999983
ENSG00000010818.10_3	5	5	[ENST00000012134.7_2, ENST00000367603.8_3, ENST00000367604.6_2, ENST00000421237.1_2, ENST00000474532.1_1]	chr6:143072605-143277835	-	-	14	205230	10655	162	10493	0.984796	ENST00000012134.7_2, ENST00000367603.8_3, ENST00000367604.6_2, ENST00000421237.1_2, ENST00000474532.1_1	HIVEP2	lncRNA, protein_coding	HIVEP2	1.73	1.62	1.68	1.53	1.64	1.35	1.71	1.4	1.34	198.996	0.409335	2.23951	0.025123	0.0915122	198.996	0.0515104	0.280212	0.779315	0.999983
ENSG00000010932.17_3	8	8	[ENST00000354841.4_2, ENST00000367750.7_2, ENST00000402921.6_2, ENST00000459868.1_2, ENST00000469112.5_2, ENST00000469711.1_1, ENST00000472893.1_1, ENST00000617670.6_3]	chr1:171217609-171255117	+	-	11	37508	3602	177	3425	0.950861	ENST00000354841.4_2, ENST00000367750.7_2, ENST00000402921.6_2, ENST00000459868.1_2, ENST00000469112.5_2, ENST00000469711.1_1, ENST00000472893.1_1, ENST00000617670.6_3	FMO1	lncRNA, nonsense_mediated_decay, protein_coding	FMO1	0.37	0	0	0.04	0.04	0	0	0.28	0	1.21377	1.66435	0.644415	0.519307	NA	1.21377	-0.501749	-0.187347	0.851389	NA
ENSG00000011007.12_3	4	4	[ENST00000418390.6_2, ENST00000487554.1_1, ENST00000609199.1_2, ENST00000613537.4_2]	chr1:24069644-24088549	+	-	12	18905	5391	0	5391	1	ENST00000418390.6_2, ENST00000487554.1_1, ENST00000609199.1_2, ENST00000613537.4_2	ELOA	lncRNA, protein_coding	TCEB3	22.01	24.08	20.35	23.9	28.08	24.79	24.02	26.6	18.62	948.599	0.181797	1.53814	0.124016	0.274977	948.599	0.187724	1.59337	0.111078	0.860048
ENSG00000011009.11_3	10	8	[ENST00000374501.1_1, ENST00000374502.7_1, ENST00000374503.7_1, ENST00000374505.6_1, ENST00000374514.8_2, ENST00000420982.5_1, ENST00000421070.1_1, ENST00000472213.1_1, ENST00000492577.1_1, ENST00000495365.5_1]	chr1:24117634-24122029	+	-	9	4395	2021	0	2021	1	ENST00000374501.1_1, ENST00000374502.7_1, ENST00000374503.7_1, ENST00000374505.6_1, ENST00000374514.8_2, ENST00000420982.5_1, ENST00000421070.1_1, ENST00000472213.1_1, ENST00000492577.1_1, ENST00000495365.5_1	LYPLA2	lncRNA, protein_coding	LYPLA2	35.14	38.97	36.91	33.97	25.91	33.48	27.67	34.82	45.08	473.224	0.25914	1.20774	0.227149	0.410816	473.224	-0.183197	-0.850608	0.394987	0.999983
ENSG00000011021.23_5	10	8	[ENST00000312413.10_1, ENST00000346436.11_2, ENST00000376490.7_1, ENST00000376491.7_1, ENST00000376492.3_1, ENST00000376496.4_1, ENST00000376497.7_2, ENST00000400892.3_2, ENST00000446542.5_2, ENST00000494028.1_1]	chr1:11866152-11908136	+	-	28	41984	8173	517	7656	0.936743	ENST00000312413.10_1, ENST00000346436.11_2, ENST00000376490.7_1, ENST00000376491.7_1, ENST00000376492.3_1, ENST00000376496.4_1, ENST00000376497.7_2, ENST00000400892.3_2, ENST00000446542.5_2, ENST00000494028.1_1	CLCN6	lncRNA, nonsense_mediated_decay, protein_coding, retained_intron	CLCN6	5.78	5.77	5.14	4.53	3.52	3.75	4.9	4.18	4.67	299.388	0.505923	2.68248	0.00730782	0.0376741	299.388	-0.191399	-1.00441	0.31518	0.999983
ENSG00000011028.14_3	7	7	[ENST00000303375.10_2, ENST00000446119.2_1, ENST00000579432.1_1, ENST00000580916.1_1, ENST00000583597.5_1, ENST00000584265.1_1, ENST00000584682.1_1]	chr17:60705030-60770958	+	-	31	65928	6591	0	6591	1	ENST00000303375.10_2, ENST00000446119.2_1, ENST00000579432.1_1, ENST00000580916.1_1, ENST00000583597.5_1, ENST00000584265.1_1, ENST00000584682.1_1	AC080038.1	lncRNA, nonsense_mediated_decay, protein_coding, retained_intron	MRC2	0.82	1.06	0.63	1.15	0.37	0.57	0.58	0.4	0.75	30.018	0.777566	1.53582	0.124582	0.275679	30.018	0.326607	0.643877	0.519655	0.999983
ENSG00000011052.21_3	3	3	[ENST00000376392.10_3, ENST00000393193.6_1, ENST00000555572.1_1]	chr17:49230950-49249105	+	-	9	18155	1241	116	1125	0.906527	ENST00000013034.3_1, ENST00000336097.7_1, ENST00000376392.10_3, ENST00000393183.7_1, ENST00000393190.4_1, ENST00000393193.6_1, ENST00000393196.7_1, ENST00000456492.1_5, ENST00000465188.1_1, ENST00000475573.5_1, ENST00000480143.5_1, ENST00000485076.1_1, ENST00000487481.1_1, ENST00000503064.5_1, ENST00000511355.5_1, ENST00000512737.5_1, ENST00000512768.1_1, ENST00000513177.5_1, ENST00000514264.6_1,…	NME1, NME1-NME2, NME2	nonsense_mediated_decay, protein_coding, retained_intron	NME1-NME2, NME2, NME1	0	0.48	0	0	0	0.23	0	1.28	0.22	2.63713	-1.48303	-0.75257	0.451708	NA	2.63713	-2.51528	-1.22752	0.219626	NA
ENSG00000011083.9_4	3	3	[ENST00000230671.7_4, ENST00000513403.1_1, ENST00000524041.1_3]	chr5:149569624-149602351	+	-	16	32727	4277	285	3992	0.933365	ENST00000230671.7_4, ENST00000513403.1_1, ENST00000524041.1_3	SLC6A7	protein_coding, retained_intron	SLC6A7	0	0	0	0	0	0	0	0	0
ENSG00000011105.14_5	9	9	[ENST00000011898.10_2, ENST00000407263.2_2, ENST00000431374.6_1, ENST00000444315.6_1, ENST00000492305.1_1, ENST00000537971.5_1, ENST00000539631.1_1, ENST00000640568.1_2, ENST00000649909.1_1]	chr12:3186520-3395730	+	-	12	209210	6905	155	6750	0.977553	ENST00000011898.10_2, ENST00000407263.2_2, ENST00000431374.6_1, ENST00000444315.6_1, ENST00000492305.1_1, ENST00000537971.5_1, ENST00000539631.1_1, ENST00000640568.1_2, ENST00000649909.1_1	TSPAN9	lncRNA, nonsense_mediated_decay, protein_coding, retained_intron	TSPAN9	2.55	3.54	4.52	3.4	5.4	4.1	4.99	7.87	6.31	93.9137	-0.630274	-2.36226	0.0181637	0.0728748	93.9137	-0.543112	-2.02484	0.042884	0.64383
ENSG00000011114.15_6	8	8	[ENST00000298896.7_2, ENST00000334746.10_3, ENST00000355125.3_3, ENST00000553975.1_1, ENST00000554565.5_1, ENST00000554644.1_1, ENST00000554968.1_1, ENST00000555525.1_1]	chr14:93703895-93799438	-	-	13	95543	11333	2208	9125	0.805171	ENST00000298896.7_2, ENST00000334746.10_3, ENST00000355125.3_3, ENST00000553975.1_1, ENST00000554565.5_1, ENST00000554644.1_1, ENST00000554968.1_1, ENST00000555525.1_1	BTBD7	nonsense_mediated_decay, protein_coding, retained_intron	BTBD7	9.07	9.95	8.78	9.34	12.3	10.49	10.23	10.9	10.09	752.505	0.0630997	0.516552	0.605469	0.756965	752.505	0.0668321	0.550943	0.581673	0.999983
ENSG00000011132.12_4	8	8	[ENST00000316757.4_2, ENST00000586991.1_1, ENST00000588984.5_1, ENST00000589934.1_1, ENST00000590064.1_1, ENST00000590238.1_1, ENST00000591678.1_1, ENST00000592826.1_1]	chr19:3750769-3761690	-	-	6	10921	5596	1115	4481	0.800751	ENST00000316757.4_2, ENST00000586991.1_1, ENST00000588984.5_1, ENST00000589934.1_1, ENST00000590064.1_1, ENST00000590238.1_1, ENST00000591678.1_1, ENST00000591962.1_1, ENST00000592826.1_1	AC005954.1, AC005954.2	lncRNA, protein_coding, retained_intron	APBA3	6.87	6.18	7.95	3.37	4.67	5.25	6.66	6.05	4.91	82.7176	0.491407	1.9813	0.0475578	0.144186	82.7176	-0.376899	-1.47816	0.139365	0.900704
ENSG00000011143.16_5	13	12	[ENST00000313863.10_2, ENST00000393119.6_1, ENST00000393120.6_1, ENST00000537529.6_1, ENST00000577315.5_2, ENST00000577824.5_2, ENST00000578789.1_1, ENST00000579358.1_1, ENST00000580127.5_1, ENST00000581180.1_1, ENST00000581761.5_1, ENST00000583577.1_1, ENST00000585134.1_4]	chr17:56282797-56296966	-	-	18	14169	4078	0	4078	1	ENST00000313863.10_2, ENST00000393119.6_1, ENST00000393120.6_1, ENST00000537529.6_1, ENST00000577315.5_2, ENST00000577824.5_2, ENST00000578789.1_1, ENST00000579358.1_1, ENST00000580127.5_1, ENST00000581180.1_1, ENST00000581761.5_1, ENST00000583577.1_1, ENST00000585134.1_4	MKS1	nonsense_mediated_decay, protein_coding, retained_intron	MKS1	13.29	17.42	16.04	17.53	23.03	21.64	18.49	21.04	12.14	262.553	0.0986647	0.564679	0.572292	0.731575	262.553	0.311785	1.79835	0.0721208	0.754165
ENSG00000011198.9_5	16	16	[ENST00000013894.3_2, ENST00000413300.2_3, ENST00000454293.2_2, ENST00000456453.5_2, ENST00000458276.7_2, ENST00000463153.2_3, ENST00000486764.1_1, ENST00000642351.1_2, ENST00000643140.1_1, ENST00000643477.1_1, ENST00000643500.1_1, ENST00000643520.1_1, ENST00000644371.1_1, ENST00000646378.1_1, ENST00000646799.1_1, ENST00000649763.1_2]	chr3:43731599-43775863	+	-	14	44264	7549	2767	4782	0.633461	ENST00000013894.3_2, ENST00000413300.2_4, ENST00000454293.2_2, ENST00000456453.5_3, ENST00000458276.7_2, ENST00000463153.2_4, ENST00000486764.1_1, ENST00000642351.1_3, ENST00000643140.1_1, ENST00000643477.1_1, ENST00000643500.1_1, ENST00000643520.1_1, ENST00000644371.1_1, ENST00000646378.1_1, ENST00000646799.1_1, ENST00000649763.1_2	ABHD5	lncRNA, nonsense_mediated_decay, protein_coding, retained_intron	ABHD5	5.23	8.76	7.45	8.14	14.52	12.67	14.93	17.25	9.1	186.13	-0.706276	-2.88513	0.00391252	0.02406	186.13	-0.182715	-0.757373	0.448826	0.999983
ENSG00000011201.12_4	3	3	[ENST00000262648.8_2, ENST00000481896.1_1, ENST00000488294.1_1]	chrX:8496914-8700178	-	-	15	203264	7082	389	6693	0.945072	ENST00000262648.8_2, ENST00000481896.1_1, ENST00000488294.1_1	ANOS1	lncRNA, protein_coding	KAL1	1.51	2.38	1.76	1.79	2.15	1.95	2.36	3.16	1.86	136.322	-0.147464	-0.694359	0.487457	0.663807	136.322	-0.278223	-1.31718	0.18778	0.953815
ENSG00000011243.18_5	20	14	[ENST00000397410.10_3, ENST00000593845.5_1, ENST00000594594.6_1, ENST00000594893.5_1, ENST00000595067.1_2, ENST00000595087.5_1, ENST00000595136.5_1, ENST00000595465.6_2, ENST00000595879.5_1, ENST00000596195.5_2, ENST00000596213.5_1, ENST00000596750.2_1, ENST00000597994.5_1, ENST00000598292.1_1, ENST00000599137.5_1, ENST00000599488.5_1, ENST00000600065.5_1, ENST00000600247.5_3, ENST00000601147.2_1…	chr19:15490860-15529952	-	-	16	39092	5079	102	4977	0.979917	ENST00000397410.10_3, ENST00000593845.5_1, ENST00000594594.6_1, ENST00000594893.5_1, ENST00000595067.1_2, ENST00000595087.5_1, ENST00000595136.5_1, ENST00000595465.6_2, ENST00000595879.5_1, ENST00000596195.5_2, ENST00000596213.5_1, ENST00000596750.2_1, ENST00000597994.5_1, ENST00000598292.1_1, ENST00000599137.5_1, ENST00000599488.5_1, ENST00000600065.5_1, ENST00000600247.5_3, ENST00000601147.2_1,…	AKAP8L	lncRNA, nonsense_mediated_decay, protein_coding, retained_intron	AKAP8L	11.87	11.84	10.55	13.02	15.05	13.34	16.33	17.22	7.53	177.807	-0.00367047	-0.015577	0.987572	0.992517	177.807	0.0685041	0.291143	0.770942	0.999983
ENSG00000011258.16_4	7	7	[ENST00000376381.3_1, ENST00000405860.7_1, ENST00000415868.5_1, ENST00000586178.6_2, ENST00000586898.1_1, ENST00000591270.1_1, ENST00000593259.1_1]	chr17:49254785-49337524	-	-	19	82739	7184	743	6441	0.896576	ENST00000376381.3_1, ENST00000405860.7_1, ENST00000415868.5_1, ENST00000586178.6_2, ENST00000586898.1_1, ENST00000591270.1_1, ENST00000593259.1_1	MBTD1	lncRNA, nonsense_mediated_decay, protein_coding, retained_intron	MBTD1	2.66	2.82	2.79	3.8	5.58	4.64	4.61	5.16	3.38	240.128	-0.42917	-2.50138	0.0123711	0.0550261	240.128	0.127647	0.767816	0.442597	0.999983
ENSG00000011260.14_3	7	7	[ENST00000225298.12_2, ENST00000508506.3_1, ENST00000579261.6_1, ENST00000582150.1_1, ENST00000582832.1_1, ENST00000583205.5_1, ENST00000583725.5_1]	chr17:49337906-49375297	+	-	16	37391	2703	0	2703	1	ENST00000225298.12_2, ENST00000508506.3_1, ENST00000579261.6_1, ENST00000582150.1_1, ENST00000582832.1_1, ENST00000583205.5_1, ENST00000583725.5_1	UTP18	nonsense_mediated_decay, protein_coding, retained_intron	UTP18	4.83	6.84	7.79	8.99	12.13	12.94	12.15	15.46	8.74	180.015	-0.664148	-3.07069	0.00213565	0.015341	180.015	-0.0525239	-0.249068	0.803308	0.999983
ENSG00000011275.18_3	9	9	[ENST00000389900.8_1, ENST00000389902.7_1, ENST00000411812.1_1, ENST00000416985.5_3, ENST00000425013.6_1, ENST00000469375.1_1, ENST00000476345.1_1, ENST00000479541.1_1, ENST00000484458.2_1]	chr7:5659677-5821370	-	-	25	161693	7619	800	6819	0.894999	ENST00000389900.8_1, ENST00000389902.7_1, ENST00000411812.1_1, ENST00000416985.5_3, ENST00000425013.6_1, ENST00000469375.1_1, ENST00000476345.1_1, ENST00000479541.1_1, ENST00000484458.2_1	RNF216	lncRNA, nonsense_mediated_decay, protein_coding, retained_intron	RNF216	12.48	15.08	14.95	18.8	20.52	19.2	17.91	21.39	16.35	738.911	-0.154745	-1.44723	0.147833	0.306759	738.911	0.110109	1.04408	0.296448	0.999983
ENSG00000011295.16_6	10	8	[ENST00000261647.10_5, ENST00000465567.1_1, ENST00000466729.5_1, ENST00000470399.1_1, ENST00000470649.1_5, ENST00000475723.5_1, ENST00000481107.1_1, ENST00000497842.6_1, ENST00000578103.1_4, ENST00000583704.1_1]	chr17:15903097-15948329	+	-	9	45232	6054	583	5471	0.9037	ENST00000261647.10_5, ENST00000453002.2_1, ENST00000465567.1_1, ENST00000466729.5_1, ENST00000470399.1_1, ENST00000470649.1_6, ENST00000475723.5_1, ENST00000481107.1_1, ENST00000497842.6_1, ENST00000578103.1_4, ENST00000583704.1_1	RPLP1P11, TTC19	lncRNA, nonsense_mediated_decay, processed_pseudogene, protein_coding, retained_intron	TTC19	2.44	3.33	3.22	4.82	5.63	5.5	5.15	6.42	3.96	141.789	-0.547742	-2.76924	0.00561873	0.0311768	141.789	0.0823736	0.434311	0.664063	0.999983
ENSG00000011304.20_7	21	19	[ENST00000349038.8_3, ENST00000350092.8_3, ENST00000356948.11_4, ENST00000394601.8_1, ENST00000585535.2_5, ENST00000585856.2_1, ENST00000585932.5_5, ENST00000585956.5_3, ENST00000586481.5_2, ENST00000586944.5_1, ENST00000587094.2_1, ENST00000587136.1_1, ENST00000587191.3_1, ENST00000589575.5_3, ENST00000589883.1_1, ENST00000590887.5_1, ENST00000592113.5_1, ENST00000592804.1_1, ENST00000621737.4_1…	chr19:797074-812327	+	-	9	15253	6883	0	6883	1	ENST00000349038.8_3, ENST00000350092.8_3, ENST00000356948.11_4, ENST00000394601.8_1, ENST00000577608.1, ENST00000585535.2_5, ENST00000585856.2_1, ENST00000585932.5_5, ENST00000585956.5_3, ENST00000586481.5_2, ENST00000586944.5_1, ENST00000587094.2_1, ENST00000587136.1_1, ENST00000587191.3_1, ENST00000589575.5_3, ENST00000589883.1_1, ENST00000590887.5_1, ENST00000592113.5_1, ENST00000592804.1_1, E…	MIR4745, PTBP1	miRNA, nonsense_mediated_decay, protein_coding, retained_intron	PTBP1	242.28	268.85	274.52	250.38	278.78	291.4	233.29	256.95	226.22	6157.1	0.362752	4.19028	2.78606e-05	0.000537179	6157.1	0.225633	2.60756	0.00911892	0.328434
ENSG00000011332.19_5	17	13	[ENST00000355526.8_3, ENST00000412732.5_1, ENST00000414789.5_1, ENST00000416611.5_1, ENST00000418517.5_1, ENST00000420980.6_1, ENST00000438060.5_2, ENST00000438365.5_1, ENST00000456296.5_3, ENST00000471976.5_1, ENST00000472656.5_1, ENST00000473716.5_1, ENST00000475938.1_1, ENST00000488378.1_1, ENST00000494031.5_1, ENST00000586624.1_2, ENST00000614244.4_1]	chr19:38701645-38720354	-	-	16	18709	4800	292	4508	0.939167	ENST00000355526.8_3, ENST00000412732.5_1, ENST00000414789.5_1, ENST00000416611.5_1, ENST00000418517.5_1, ENST00000420980.6_1, ENST00000438060.5_2, ENST00000438365.5_1, ENST00000456296.5_3, ENST00000471976.5_1, ENST00000472656.5_1, ENST00000473716.5_1, ENST00000475938.1_1, ENST00000488378.1_1, ENST00000494031.5_1, ENST00000586624.1_2, ENST00000614244.4_1	DPF1	nonsense_mediated_decay, protein_coding, retained_intron	DPF1	2.44	1.82	2.72	1.34	2.16	3.05	2.03	2.06	2.2	42.5473	0.385501	1.05939	0.28942	0.479147	42.5473	0.0660459	0.181828	0.855718	0.999983
ENSG00000011347.9_4	10	7	[ENST00000263846.8_3, ENST00000535826.5_2, ENST00000539008.5_2, ENST00000539246.5_1, ENST00000539468.5_1, ENST00000540677.5_3, ENST00000540831.1_1, ENST00000542670.5_2, ENST00000542836.5_3, ENST00000545053.1_1]	chr11:61282784-61348620	-	-	15	65836	5953	287	5666	0.951789	ENST00000263846.8_3, ENST00000535826.5_2, ENST00000539008.5_3, ENST00000539246.5_1, ENST00000539468.5_1, ENST00000540677.5_3, ENST00000540831.1_1, ENST00000542670.5_2, ENST00000542836.5_3, ENST00000545053.1_1	SYT7	lncRNA, nonsense_mediated_decay, protein_coding	SYT7	12.05	11.47	14.43	17.67	18.97	19.37	25.31	25.47	21.39	763.18	-0.691667	-5.54599	2.92292e-08	1.74401e-06	763.18	-0.332153	-2.69904	0.00695399	0.281921
ENSG00000011376.11_6	13	11	[ENST00000265537.8_3, ENST00000414984.5_2, ENST00000415258.6_3, ENST00000430399.1_6, ENST00000431023.6_2, ENST00000467936.5_1, ENST00000474585.1_1, ENST00000485461.1_4, ENST00000642274.1_1, ENST00000645846.2_2, ENST00000650792.1_1, ENST00000651549.1_1, ENST00000652135.1_1]	chr3:45429997-45596218	+	-	29	166221	12462	2600	9862	0.791366	ENST00000265537.8_3, ENST00000414984.5_2, ENST00000430399.1_7, ENST00000431023.6_2, ENST00000467936.5_1, ENST00000474585.1_1, ENST00000485461.1_4, ENST00000642274.1_1, ENST00000645846.2_2, ENST00000650792.2_2, ENST00000651549.1_1, ENST00000652135.1_1	LARS2	lncRNA, nonsense_mediated_decay, protein_coding, retained_intron	LARS2	2.52	2.35	3.09	2.67	3.32	3.13	2.97	4.48	2.98	162.699	-0.146619	-0.745901	0.455727	0.637171	162.699	-0.15176	-0.781478	0.434522	0.999983
ENSG00000011405.13_3	5	5	[ENST00000265970.11_1, ENST00000503729.2_1, ENST00000531428.1_1, ENST00000532035.1_3, ENST00000533645.1_1]	chr11:17099276-17229530	-	-	37	130254	9204	518	8686	0.94372	ENST00000265970.11_1, ENST00000503729.2_1, ENST00000531428.1_1, ENST00000532035.1_3, ENST00000533645.1_1	PIK3C2A	lncRNA, nonsense_mediated_decay, protein_coding	PIK3C2A, RPS13	4.09	4.21	4.22	5.78	6.77	5.57	7.18	7.07	5.14	531.999	-0.391421	-2.92083	0.00349098	0.0221145	531.999	-0.0608901	-0.460223	0.645356	0.999983
ENSG00000011422.12_5	16	16	[ENST00000221264.8_3, ENST00000339082.7_1, ENST00000340093.8_4, ENST00000593396.1_1, ENST00000593447.5_1, ENST00000593714.5_1, ENST00000593939.5_1, ENST00000594364.1_1, ENST00000595038.5_1, ENST00000597107.1_1, ENST00000598875.1_1, ENST00000599546.1_1, ENST00000599892.5_1, ENST00000601723.5_1, ENST00000601876.1_1, ENST00000602141.5_2]	chr19:44150246-44174699	-	-	10	24453	4457	1703	2754	0.617904	ENST00000221264.8_3, ENST00000339082.7_1, ENST00000340093.8_4, ENST00000593396.1_1, ENST00000593447.5_1, ENST00000593714.5_1, ENST00000593939.5_1, ENST00000594364.1_1, ENST00000595038.5_1, ENST00000597107.1_1, ENST00000598875.1_1, ENST00000599546.1_1, ENST00000599892.5_1, ENST00000601723.5_1, ENST00000601876.1_1, ENST00000602141.5_2	PLAUR	nonsense_mediated_decay, protein_coding, retained_intron	PLAUR	3.55	3.28	2.87	2.36	3.24	2.94	2.04	2.31	1.65	41.5995	0.938043	2.92397	0.00345595	0.0219241	41.5995	0.54133	1.67387	0.0941566	0.818064
ENSG00000011426.11_5	13	13	[ENST00000265748.7_4, ENST00000396068.6_3, ENST00000418118.1_3, ENST00000424865.1_1, ENST00000428612.5_3, ENST00000429082.1_1, ENST00000441696.5_3, ENST00000446635.5_3, ENST00000452877.5_3, ENST00000457743.1_3, ENST00000460598.1_1, ENST00000491782.1_1, ENST00000495714.1_1]	chr7:36429429-36493400	+	-	28	63971	5997	313	5684	0.947807	ENST00000265748.7_4, ENST00000396068.6_3, ENST00000418118.1_3, ENST00000424865.1_2, ENST00000428612.5_4, ENST00000429082.1_2, ENST00000441696.5_3, ENST00000446635.5_4, ENST00000452877.5_4, ENST00000457743.1_3, ENST00000460598.1_1, ENST00000491782.1_1, ENST00000495714.1_1	ANLN	lncRNA, nonsense_mediated_decay, protein_coding, retained_intron	ANLN	85.49	88.02	89.7	114.61	115.16	116.65	131.27	128.04	133.64	1175.78	-0.352895	-2.88094	0.00396485	0.0242804	1175.78	-0.155853	-1.28221	0.199771	0.96277
ENSG00000011451.19_6	10	8	[ENST00000263381.11_2, ENST00000389282.8_1, ENST00000545156.5_2, ENST00000595214.2_1, ENST00000596159.1_3, ENST00000599686.3_4, ENST00000599910.6_3, ENST00000600632.1_1, ENST00000643092.1_1, ENST00000648664.1_1]	chr19:15530790-15560762	-	-	16	29972	9826	634	9192	0.935477	ENST00000263381.11_2, ENST00000389282.8_1, ENST00000545156.5_2, ENST00000595214.2_1, ENST00000596159.1_4, ENST00000599686.3_5, ENST00000599910.6_4, ENST00000600632.1_1, ENST00000643092.1_1, ENST00000648664.1_1	WIZ	nonsense_mediated_decay, protein_coding, retained_intron	WIZ	19.12	20.49	19.47	19.6	15.57	19.84	16.58	16.55	23.09	945.073	0.279966	1.42388	0.154483	0.31593	945.073	-0.0161564	-0.0821061	0.934562	0.999983
ENSG00000011454.17_4	13	11	[ENST00000317419.7_1, ENST00000373647.9_2, ENST00000402311.5_3, ENST00000426918.2_1, ENST00000456584.5_1, ENST00000459903.5_1, ENST00000468760.1_1, ENST00000474707.1_1, ENST00000475607.1_1, ENST00000480054.1_1, ENST00000485090.1_1, ENST00000493854.5_1, ENST00000616002.1_1]	chr9:125703111-125867145	+	-	31	164034	9151	622	8529	0.932029	ENST00000317419.7_1, ENST00000373642.1_1, ENST00000373647.9_2, ENST00000402311.5_3, ENST00000426918.2_1, ENST00000456584.5_1, ENST00000459903.5_1, ENST00000468760.1_1, ENST00000474707.1_1, ENST00000475607.1_1, ENST00000480054.1_1, ENST00000485090.1_1, ENST00000493854.5_1, ENST00000616002.1_1	GPR21, RABGAP1	lncRNA, nonsense_mediated_decay, protein_coding, retained_intron	RABGAP1, GPR21	12.42	13.13	15.16	19.05	24.84	18.66	20.35	29.21	16.19	416.06	-0.442051	-2.55686	0.0105621	0.0492376	416.06	-0.0264558	-0.155291	0.876592	0.999983
ENSG00000011465.17_4	20	17	[ENST00000052754.10_2, ENST00000393155.5_1, ENST00000420120.6_1, ENST00000425043.5_1, ENST00000441303.6_1, ENST00000456569.2_1, ENST00000546370.5_1, ENST00000546391.5_2, ENST00000546745.5_1, ENST00000547568.6_1, ENST00000547937.5_1, ENST00000548218.1_1, ENST00000548768.1_1, ENST00000549513.5_2, ENST00000550099.5_1, ENST00000550563.5_2, ENST00000550758.1_2, ENST00000551354.1_1, ENST00000552145.5_2…	chr12:91534260-91576601	-	-	15	42341	12548	2746	9802	0.78116	ENST00000052754.10_2, ENST00000393155.5_1, ENST00000420120.6_1, ENST00000425043.5_1, ENST00000441303.6_1, ENST00000456569.2_1, ENST00000546370.5_1, ENST00000546391.5_2, ENST00000546745.5_1, ENST00000547568.6_1, ENST00000547937.5_1, ENST00000548218.1_1, ENST00000548768.1_1, ENST00000549513.5_2, ENST00000550099.5_1, ENST00000550563.5_2, ENST00000550758.1_2, ENST00000551354.1_1, ENST00000552145.5_2,…	DCN	lncRNA, protein_coding	DCN	0	0	0	0	0.23	0	0.09	0.08	0	0.554437	-1.95055	-0.581336	0.561014	NA	0.554437	0.459553	0.141556	0.887431	NA
ENSG00000011478.12_3	4	4	[ENST00000012049.10_2, ENST00000366382.8_1, ENST00000591606.1_1, ENST00000592769.1_1]	chr19:46195923-46207247	+	-	7	11324	2213	598	1615	0.729779	ENST00000012049.10_2, ENST00000366382.8_1, ENST00000591606.1_1, ENST00000592769.1_1	QPCTL	nonsense_mediated_decay, protein_coding, retained_intron	QPCTL	12.76	17.28	13.58	13.02	13.12	13.48	10.92	11.2	13.37	318.31	0.514954	2.88825	0.00387394	0.0238782	318.31	0.183184	1.02295	0.306333	0.999983
ENSG00000011485.14_2	15	15	[ENST00000012443.8_1, ENST00000391919.1_1, ENST00000467502.6_1, ENST00000467902.2_1, ENST00000478046.5_1, ENST00000486994.5_1, ENST00000487483.6_1, ENST00000491003.5_1, ENST00000492109.6_1, ENST00000493347.5_1, ENST00000525507.5_1, ENST00000527193.1_1, ENST00000527623.1_1, ENST00000532058.1_1, ENST00000595055.1_1]	chr19:46850250-46896238	+	-	11	45988	7059	2061	4998	0.708032	ENST00000012443.8_1, ENST00000391919.1_1, ENST00000467502.6_1, ENST00000467902.2_1, ENST00000478046.5_1, ENST00000486994.5_1, ENST00000487483.6_1, ENST00000491003.5_1, ENST00000492109.6_1, ENST00000493347.5_1, ENST00000525507.5_1, ENST00000527193.1_1, ENST00000527623.1_1, ENST00000532058.1_1, ENST00000595055.1_1	PPP5C	nonsense_mediated_decay, protein_coding, retained_intron	PPP5C	43.12	45.37	51.94	48.56	50.62	53.32	58.29	56.71	55.7	1130.12	-0.0550689	-0.460448	0.645195	0.783561	1130.12	-0.134842	-1.13012	0.258424	0.999983
ENSG00000011523.14_4	5	5	[ENST00000260569.4_2, ENST00000377990.7_3, ENST00000475851.1_1, ENST00000497039.1_1, ENST00000537589.1_3]	chr2:65283499-65314138	+	-	7	30639	8623	1403	7220	0.837296	ENST00000260569.4_2, ENST00000377990.7_3, ENST00000475851.1_1, ENST00000497039.1_1, ENST00000537589.1_3	CEP68	lncRNA, protein_coding	CEP68	1.86	1.93	2.04	1.41	1.98	1.35	1.98	1.49	1.72	95.0835	0.403494	1.62742	0.103648	0.244177	95.0835	-0.0973783	-0.392279	0.694852	0.999983
ENSG00000011566.15_5	13	13	[ENST00000263881.8_4, ENST00000341681.9_3, ENST00000414968.1_1, ENST00000429397.5_1, ENST00000437545.5_1, ENST00000437968.1_1, ENST00000465701.1_1, ENST00000474502.5_1, ENST00000475457.1_1, ENST00000479708.1_1, ENST00000484274.1_1, ENST00000495648.3_1, ENST00000497566.5_1]	chr2:39476406-39664442	-	-	37	188036	6056	260	5796	0.957067	ENST00000263881.8_4, ENST00000341681.9_3, ENST00000414968.1_1, ENST00000429397.5_1, ENST00000437545.5_1, ENST00000437968.1_1, ENST00000465701.1_1, ENST00000474502.5_1, ENST00000475457.1_1, ENST00000479708.1_1, ENST00000484274.1_1, ENST00000495648.3_1, ENST00000497566.5_1	MAP4K3	lncRNA, nonsense_mediated_decay, protein_coding, retained_intron	MAP4K3	5.25	6.21	4.81	10.18	9.59	11.67	10.39	12.98	9.7	210.229	-0.792216	-4.46705	7.93049e-06	0.000184617	210.229	-0.0364884	-0.212691	0.831568	0.999983
ENSG00000011590.14_4	6	6	[ENST00000262630.7_1, ENST00000392197.7_2, ENST00000426659.6_2, ENST00000442282.1_1, ENST00000451726.1_1, ENST00000481182.1_1]	chr19:36195459-36207940	+	-	8	12481	2739	218	2521	0.920409	ENST00000262630.7_1, ENST00000392197.7_2, ENST00000426659.6_2, ENST00000442282.1_1, ENST00000451726.1_1, ENST00000481182.1_1	ZBTB32	lncRNA, nonsense_mediated_decay, protein_coding	ZBTB32	0	0	0	0	0	0	0	0	0
ENSG00000011600.11_2	9	4	[ENST00000262629.8_1, ENST00000424586.7_1, ENST00000544690.6_1, ENST00000585626.1_1, ENST00000585901.6_1, ENST00000586946.1_1, ENST00000587837.5_1, ENST00000588439.1_1, ENST00000589517.1_1]	chr19:36395302-36399197	-	-	3	3895	907	0	907	1	ENST00000262629.8_1, ENST00000424586.7_1, ENST00000544690.6_1, ENST00000585626.1_1, ENST00000585901.6_1, ENST00000586946.1_1, ENST00000587837.5_1, ENST00000588439.1_1, ENST00000589517.1_1	TYROBP	nonsense_mediated_decay, protein_coding, retained_intron	TYROBP	0	0	0	0	0	0	0	0	0
ENSG00000011638.10_3	9	8	[ENST00000233047.8_2, ENST00000261388.7_2, ENST00000451578.6_2, ENST00000572258.5_1, ENST00000572599.5_2, ENST00000573487.5_1, ENST00000573688.1_1, ENST00000574092.1_1, ENST00000577162.1_1]	chr16:21169697-21191937	+	-	9	22240	2558	734	1824	0.713057	ENST00000233047.8_2, ENST00000261388.7_2, ENST00000451578.6_2, ENST00000572258.5_1, ENST00000572599.5_2, ENST00000573487.5_1, ENST00000573688.1_1, ENST00000574092.1_1, ENST00000577162.1_1	TMEM159	lncRNA, nonsense_mediated_decay, protein_coding	TMEM159	7.66	6.7	7.03	5.75	10.84	7.91	10.38	11.05	6.82	102.26	-0.158939	-0.62535	0.531741	0.698408	102.26	-0.176726	-0.702224	0.482539	0.999983
ENSG00000011677.13_3	4	4	[ENST00000370314.9_2, ENST00000417858.1_1, ENST00000497894.1_1, ENST00000535043.1_1]	chrX:151334705-151619787	-	-	13	285082	4150	170	3980	0.959036	ENST00000370314.9_2, ENST00000417858.1_1, ENST00000497894.1_1, ENST00000535043.1_1	GABRA3	lncRNA, protein_coding	GABRA3	0	0.05	0	0	0	0	0	0.09	0	0.272991	-0.523613	-0.128977	0.897376	NA	0.272991	-1.61832	-0.398634	0.690163	NA
ENSG00000012048.22_5	34	25	[ENST00000352993.7_2, ENST00000354071.7_1, ENST00000357654.8_3, ENST00000412061.3_1, ENST00000461221.5_1, ENST00000461574.1_2, ENST00000461798.5_1, ENST00000468300.5_2, ENST00000470026.5_1, ENST00000471181.7_3, ENST00000472490.1_1, ENST00000473961.5_1, ENST00000476777.5_1, ENST00000477152.5_2, ENST00000478531.5_1, ENST00000484087.5_1, ENST00000487825.5_1, ENST00000489037.1_1, ENST00000491747.6_3,…	chr17:41196311-41322262	-	-	31	125951	9306	1231	8075	0.86772	ENST00000352993.7_2, ENST00000354071.7_1, ENST00000357654.8_3, ENST00000412061.3_1, ENST00000461221.5_1, ENST00000461574.1_2, ENST00000461798.5_1, ENST00000468300.5_2, ENST00000470026.5_1, ENST00000471181.7_3, ENST00000472490.1_1, ENST00000473961.5_1, ENST00000476777.5_1, ENST00000477152.5_2, ENST00000478531.5_1, ENST00000484087.5_1, ENST00000487825.5_1, ENST00000489037.1_1, ENST00000491747.6_3, …	AC060780.1, BRCA1	lncRNA, non_stop_decay, nonsense_mediated_decay, protein_coding, retained_intron	BRCA1	3.83	6.55	4.71	9.79	10.38	8.7	10.88	11.66	8.58	301.578	-0.823965	-4.56912	4.89771e-06	0.000122175	301.578	-0.070171	-0.397989	0.690639	0.999983
ENSG00000012061.15_4	17	17	[ENST00000013807.9_1, ENST00000300853.7_2, ENST00000340192.11_2, ENST00000423698.6_2, ENST00000587888.5_3, ENST00000588300.1_1, ENST00000588738.5_1, ENST00000589165.5_2, ENST00000589214.1_3, ENST00000589381.5_3, ENST00000590701.5_3, ENST00000591636.5_1, ENST00000592023.5_3, ENST00000592083.5_3, ENST00000592410.5_1, ENST00000592444.5_1, ENST00000592905.5_1]	chr19:45910590-45982086	-	-	17	71496	5576	1460	4116	0.738164	ENST00000013807.9_1, ENST00000300853.7_2, ENST00000340192.11_2, ENST00000423698.6_2, ENST00000587888.5_3, ENST00000588300.1_1, ENST00000588738.5_1, ENST00000589165.5_2, ENST00000589214.1_4, ENST00000589381.5_4, ENST00000590701.5_3, ENST00000591636.5_1, ENST00000592023.5_3, ENST00000592083.5_3, ENST00000592410.5_1, ENST00000592444.5_1, ENST00000592905.5_1	ERCC1	lncRNA, nonsense_mediated_decay, protein_coding, retained_intron	ERCC1	25.13	22.26	25.18	19.55	18.01	22.12	19.57	21.5	19.45	275.89	0.498938	3.06221	0.00219707	0.0156802	275.89	0.0111322	0.067547	0.946146	0.999983
ENSG00000012124.17_4	34	16	[ENST00000085219.10_2, ENST00000341773.10_2, ENST00000419549.6_1, ENST00000536635.6_2, ENST00000544992.6_1, ENST00000593704.1_1, ENST00000593867.5_1, ENST00000594125.1_1, ENST00000594250.5_2, ENST00000594349.1_1, ENST00000594954.5_1, ENST00000595419.5_1, ENST00000595780.5_1, ENST00000596492.5_1, ENST00000597433.1_1, ENST00000597916.5_1, ENST00000598028.5_1, ENST00000598138.5_1, ENST00000598537.5_…	chr19:35810163-35838264	+	-	15	28101	6165	499	5666	0.919059	ENST00000085219.10_2, ENST00000341773.10_2, ENST00000419549.6_1, ENST00000536635.6_2, ENST00000544992.6_1, ENST00000593704.1_1, ENST00000593867.5_1, ENST00000594125.1_1, ENST00000594250.5_2, ENST00000594349.1_1, ENST00000594954.5_1, ENST00000595419.5_1, ENST00000595780.5_1, ENST00000596492.5_1, ENST00000597433.1_1, ENST00000597916.5_1, ENST00000598028.5_1, ENST00000598138.5_1, ENST00000598537.5_1…	CD22	lncRNA, nonsense_mediated_decay, protein_coding, retained_intron	CD22	0.92	1.07	1.37	1.84	1.17	2.3	1.3	1.5	0.8	17.5236	0.120473	0.232113	0.81645	0.897709	17.5236	0.607079	1.22625	0.220105	0.97518
ENSG00000012171.19_4	15	15	[ENST00000416295.1_1, ENST00000418576.3_1, ENST00000419007.5_1, ENST00000433753.4_1, ENST00000434030.1_1, ENST00000439487.5_1, ENST00000441915.5_1, ENST00000456210.5_1, ENST00000456560.6_1, ENST00000611067.4_2, ENST00000612509.4_1, ENST00000616701.4_1, ENST00000618865.4_1, ENST00000619119.4_1, ENST00000621029.4_1]	chr3:50304989-50314977	+	-	13	9988	5767	392	5375	0.932027	ENST00000416295.1_1, ENST00000418576.3_1, ENST00000419007.5_1, ENST00000433753.4_1, ENST00000434030.1_1, ENST00000439487.5_1, ENST00000441915.5_1, ENST00000456210.5_1, ENST00000456560.6_1, ENST00000611067.4_2, ENST00000612509.4_1, ENST00000616701.4_1, ENST00000618865.4_1, ENST00000619119.4_1, ENST00000621029.4_1	SEMA3B	lncRNA, protein_coding, retained_intron		7.42	7.4	5.88	2.65	3.57	4.42	1.52	2.64	3.59	109.191	1.66505	5.37308	7.74035e-08	3.95864e-06	109.191	0.493069	1.55611	0.119682	0.865008
ENSG00000012174.12_4	3	3	[ENST00000365779.2_1, ENST00000379484.10_2, ENST00000465888.1_1]	chrX:21857734-21903541	+	-	12	45807	8945	1467	7478	0.835998	ENST00000365779.2_1, ENST00000379484.10_2, ENST00000383912.1, ENST00000429584.2_1, ENST00000465888.1_1	MBTPS2, YY2, Y_RNA	lncRNA, misc_RNA, protein_coding	YY2, MBTPS2	4.84	5.83	4.75	7.01	7.78	6.61	7.32	7.7	5.38	330.871	-0.166953	-1.11107	0.266536	0.454732	330.871	0.107014	0.723331	0.469476	0.999983
ENSG00000012211.13_4	8	8	[ENST00000376310.7_1, ENST00000376317.4_3, ENST00000432913.5_3, ENST00000453382.5_1, ENST00000540849.5_1, ENST00000599218.6_2, ENST00000611313.1_1, ENST00000614014.1_1]	chrX:49031150-49042981	-	-	10	11831	3654	307	3347	0.915983	ENST00000376310.7_1, ENST00000376317.4_3, ENST00000432913.5_3, ENST00000453382.5_1, ENST00000540849.5_1, ENST00000599218.6_2, ENST00000611313.1_1, ENST00000614014.1_1	PRICKLE3	nonsense_mediated_decay, protein_coding, retained_intron	PRICKLE3	17.6	17.18	15.81	15.97	12.83	14.14	15.1	14.39	14.79	478.398	0.421496	2.58133	0.00984191	0.0468781	478.398	-0.0126531	-0.077201	0.938464	0.999983
ENSG00000012223.12_3	9	9	[ENST00000231751.8_2, ENST00000417439.5_2, ENST00000426532.6_2, ENST00000431944.1_1, ENST00000443496.5_1, ENST00000462667.1_1, ENST00000478874.2_1, ENST00000493056.5_1, ENST00000498301.1_1]	chr3:46477135-46526724	-	-	24	49589	4247	606	3641	0.857311	ENST00000231751.8_2, ENST00000417439.5_2, ENST00000426532.6_2, ENST00000431944.1_1, ENST00000443496.5_1, ENST00000462667.1_1, ENST00000478874.2_1, ENST00000493056.5_1, ENST00000498301.1_1	LTF	lncRNA, protein_coding, retained_intron	LTF	0	0.04	0.2	0	0	0	0	0	0	0.471585	2.89599	0.746858	0.455149	NA	0.471585	0	0	1	NA
ENSG00000012232.8_2	14	14	[ENST00000220562.8_1, ENST00000454906.6_1, ENST00000517738.1_1, ENST00000518223.1_1, ENST00000519288.5_1, ENST00000519886.5_1, ENST00000520679.1_1, ENST00000520940.1_1, ENST00000521473.5_1, ENST00000521532.5_1, ENST00000522698.1_1, ENST00000522725.5_1, ENST00000523149.5_1, ENST00000523271.1_1]	chr8:28457985-28613116	+	-	18	155131	13220	3069	10151	0.767852	ENST00000220562.8_1, ENST00000454906.6_1, ENST00000517738.1_1, ENST00000518223.1_1, ENST00000519288.5_1, ENST00000519886.5_1, ENST00000520679.1_1, ENST00000520940.1_1, ENST00000521473.5_1, ENST00000521532.5_1, ENST00000522698.1_1, ENST00000522725.5_1, ENST00000523149.5_1, ENST00000523271.1_1	EXTL3	lncRNA, nonsense_mediated_decay, protein_coding, retained_intron	EXTL3	4.43	4.25	5.74	4.92	5.52	3.51	5.55	5.99	7.28	117.658	-0.161964	-0.62744	0.530371	0.697438	117.658	-0.416013	-1.62964	0.103177	0.836394
ENSG00000012504.15_4	11	9	[ENST00000188403.7_1, ENST00000321046.9_1, ENST00000392986.8_2, ENST00000546380.1_1, ENST00000548621.2_2, ENST00000548884.5_1, ENST00000549996.5_1, ENST00000551184.1_4, ENST00000551379.5_1, ENST00000648861.1_2, ENST00000649582.1_1]	chr12:100867485-100958192	+	-	15	90707	3628	339	3289	0.90656	ENST00000188403.7_1, ENST00000321046.9_1, ENST00000392986.8_2, ENST00000546380.1_1, ENST00000548621.2_2, ENST00000548884.5_1, ENST00000549996.5_1, ENST00000551184.1_4, ENST00000551379.5_1, ENST00000648861.1_3, ENST00000649582.1_2	NR1H4	nonsense_mediated_decay, protein_coding	NR1H4	0	0	0	0	0	0	0	0	0
ENSG00000012660.14_4	7	4	[ENST00000304434.11_2, ENST00000370913.5_1, ENST00000370918.8_1, ENST00000465983.5_1, ENST00000485336.5_1, ENST00000486973.1_1, ENST00000542638.5_1]	chr6:53132195-53213977	-	-	13	81782	3813	306	3507	0.919748	ENST00000304434.11_2, ENST00000370913.5_1, ENST00000370918.8_1, ENST00000465983.5_1, ENST00000485336.5_1, ENST00000486973.1_1, ENST00000542638.5_1	ELOVL5	lncRNA, protein_coding	ELOVL5	41.62	52.24	47.55	68.29	53.5	62.3	67.75	58.31	72.26	971.026	-0.275624	-1.574	0.115487	0.262707	971.026	-0.0842675	-0.483291	0.628889	0.999983
ENSG00000012779.11_3	8	8	[ENST00000374391.7_2, ENST00000475300.1_1, ENST00000481117.1_1, ENST00000483623.2_1, ENST00000493336.1_1, ENST00000498461.1_1, ENST00000542434.5_1, ENST00000612635.4_1]	chr10:45869623-45941567	+	-	14	71944	3730	80	3650	0.978552	ENST00000374391.7_2, ENST00000475300.1_1, ENST00000481117.1_1, ENST00000483623.2_1, ENST00000493336.1_1, ENST00000498461.1_1, ENST00000542434.5_1, ENST00000612635.4_1	ALOX5	lncRNA, protein_coding	ALOX5	0	0	0.03	0.09	0.03	0.04	0.04	0.23	0	0.872953	-1.79809	-0.79594	0.426067	NA	0.872953	-0.511165	-0.246217	0.805514	NA
ENSG00000012817.15_5	10	9	[ENST00000317961.8_3, ENST00000382806.6_2, ENST00000415360.1_1, ENST00000440077.5_3, ENST00000447300.1_1, ENST00000469599.6_1, ENST00000478891.1_1, ENST00000485154.1_1, ENST00000492117.1_1, ENST00000541639.5_3]	chrY:21865750-21906825	-	-	26	41075	9463	1711	7752	0.819191	ENST00000317961.8_4, ENST00000382806.6_2, ENST00000415360.1_1, ENST00000440077.5_3, ENST00000447300.1_1, ENST00000469599.6_1, ENST00000478891.1_1, ENST00000485154.1_1, ENST00000492117.1_1, ENST00000541639.5_4	KDM5D	protein_coding, retained_intron	KDM5D	0	0	0	0	0	0	0	0	0
ENSG00000012822.16_4	22	14	[ENST00000262059.8_1, ENST00000430117.6_1, ENST00000546443.5_3, ENST00000546619.5_2, ENST00000546774.1_1, ENST00000547885.5_1, ENST00000547949.6_2, ENST00000547988.5_1, ENST00000548177.5_3, ENST00000548263.5_1, ENST00000548431.1_1, ENST00000549173.5_4, ENST00000549349.5_1, ENST00000549613.1_1, ENST00000549688.1_4, ENST00000549784.5_3, ENST00000549935.6_1, ENST00000550804.6_2, ENST00000551900.5_1,…	chr12:54102300-54121529	-	-	14	19229	8898	739	8159	0.916948	ENST00000262059.8_1, ENST00000430117.6_1, ENST00000546443.5_3, ENST00000546619.5_3, ENST00000546774.1_1, ENST00000547885.5_1, ENST00000547949.6_3, ENST00000547988.5_1, ENST00000548177.5_3, ENST00000548263.5_1, ENST00000548431.1_1, ENST00000549173.5_5, ENST00000549349.5_1, ENST00000549613.1_1, ENST00000549688.1_5, ENST00000549784.5_3, ENST00000549935.6_1, ENST00000550804.6_2, ENST00000551900.5_1, …	CALCOCO1	lncRNA, protein_coding, retained_intron	CALCOCO1	6.35	8.04	8.91	7.12	7.78	7.4	6.22	5.91	6.11	108.559	0.577748	2.69518	0.00703496	0.0365862	108.559	0.325251	1.50499	0.132326	0.890676
ENSG00000012963.15_4	7	6	[ENST00000013070.11_2, ENST00000553674.1_1, ENST00000553857.5_1, ENST00000554232.5_1, ENST00000555113.5_1, ENST00000555329.1_1, ENST00000556871.5_1]	chr14:93673585-93695561	+	-	11	21976	3509	0	3509	1	ENST00000013070.11_2, ENST00000553674.1_1, ENST00000553857.5_1, ENST00000554232.5_1, ENST00000554824.5_4, ENST00000555113.5_1, ENST00000555329.1_1, ENST00000556871.5_1, ENST00000557048.1_1, ENST00000557574.1_4	AL110118.2, UBR7	lncRNA, nonsense_mediated_decay, protein_coding	RP11-371E8.4, UBR7	15.75	20.75	18.87	25.52	29.76	28.25	26.52	30.29	23.04	1010.48	-0.295824	-2.77703	0.00548589	0.0306112	1010.48	0.100561	0.955263	0.339445	0.999983
ENSG00000012983.11_2	10	10	[ENST00000013125.8_1, ENST00000554066.1_1, ENST00000554091.5_1, ENST00000554273.1_1, ENST00000554990.5_1, ENST00000555216.5_1, ENST00000557124.1_1, ENST00000557210.5_1, ENST00000557390.5_1, ENST00000557578.1_1]	chr14:50885218-51027844	-	-	36	142626	7620	1166	6454	0.846982	ENST00000013125.8_1, ENST00000554066.1_1, ENST00000554091.5_1, ENST00000554273.1_2, ENST00000554990.5_1, ENST00000555216.5_2, ENST00000557124.1_1, ENST00000557210.5_1, ENST00000557390.5_1, ENST00000557578.1_1	MAP4K5	lncRNA, nonsense_mediated_decay, protein_coding, retained_intron	MAP4K5	6.55	9.72	8.73	10.9	15.28	11.62	12.17	15.01	13.97	512.594	-0.499106	-3.03984	0.00236707	0.0166335	512.594	-0.0997628	-0.615524	0.538209	0.999983
ENSG00000013016.16_4	1	1	[ENST00000322054.10_2]	chr2:31457017-31492317	+	-	6	35300	4825	299	4526	0.938031	ENST00000322054.10_2	EHD3	protein_coding	EHD3	1.48	1.71	1.14	1.59	2.01	1.75	1.41	1.99	1.41	98.2914	0.0856875	0.364771	0.715283	0.833256	98.2914	0.189561	0.817506	0.413639	0.999983
ENSG00000013275.7_2	6	5	[ENST00000157812.6_1, ENST00000455878.2_1, ENST00000593455.5_1, ENST00000596386.1_1, ENST00000601194.1_1, ENST00000601697.5_1]	chr19:40476911-40487348	+	-	9	10437	2387	133	2254	0.944281	ENST00000157812.6_1, ENST00000455878.2_1, ENST00000593455.5_1, ENST00000596386.1_1, ENST00000601194.1_1, ENST00000601697.5_1	PSMC4	protein_coding, retained_intron	PSMC4	80.37	100.82	86.18	96.21	92.95	102.78	97.91	102.6	96.71	1641.13	0.0721323	0.621202	0.534467	0.700668	1641.13	0.00488077	0.0421161	0.966406	0.999983
ENSG00000013288.8_3	5	5	[ENST00000285599.7_2, ENST00000504248.5_1, ENST00000504960.1_1, ENST00000505907.1_2, ENST00000510427.1_1]	chr4:6576901-6625089	+	-	18	48188	8898	2208	6690	0.751854	ENST00000285599.7_2, ENST00000504248.5_1, ENST00000504960.1_1, ENST00000505907.1_2, ENST00000510427.1_1	MAN2B2	lncRNA, protein_coding	MAN2B2	4.7	5.65	4.42	5.45	5.56	5.56	5.18	4.89	5.56	374.881	0.140767	0.86499	0.387044	0.577013	374.881	0.110692	0.682093	0.49518	0.999983
ENSG00000013293.6_4	2	2	[ENST00000231706.6_2, ENST00000466168.1_2]	chr3:170177335-170303864	-	-	9	126529	10496	1474	9022	0.859566	ENST00000231706.6_2, ENST00000466168.1_2	SLC7A14	lncRNA, protein_coding	SLC7A14	0.01	0.01	0	0.01	0.03	0.01	0.26	0.02	0	2.7557	-1.92602	-1.0504	0.293533	NA	2.7557	-0.577259	-0.357095	0.721021	NA
ENSG00000013297.11_4	7	6	[ENST00000064724.7_2, ENST00000468358.5_2, ENST00000477531.3_2, ENST00000486429.1_1, ENST00000488989.1_1, ENST00000489485.5_2, ENST00000643053.1_1]	chr3:170136652-170172521	+	-	7	35869	3732	558	3174	0.850482	ENST00000064724.7_2, ENST00000468358.5_2, ENST00000471373.5_2, ENST00000477531.3_2, ENST00000486429.1_1, ENST00000486975.1_2, ENST00000488989.1_1, ENST00000489485.5_2, ENST00000643053.1_1	AC026316.4, CLDN11	lncRNA, protein_coding, retained_intron	CLDN11	0.33	0.26	0.08	0.09	0	0	0.09	0.16	0	1.64222	1.84519	1.06445	0.287126	NA	1.64222	-1.50098	-0.728686	0.466194	NA
ENSG00000013306.16_4	17	14	[ENST00000225308.12_1, ENST00000377095.10_2, ENST00000537904.6_3, ENST00000585523.1_1, ENST00000585636.5_1, ENST00000585695.5_1, ENST00000586016.5_1, ENST00000586633.5_1, ENST00000588049.5_1, ENST00000588315.5_1, ENST00000588767.5_2, ENST00000590194.5_1, ENST00000591006.5_1, ENST00000591151.1_1, ENST00000592372.5_1, ENST00000592857.5_1, ENST00000593166.1_1]	chr17:42396992-42402238	-	-	8	5246	3526	508	3018	0.855927	ENST00000225308.12_1, ENST00000377095.10_2, ENST00000537904.6_3, ENST00000585523.1_2, ENST00000585636.5_1, ENST00000585695.5_1, ENST00000586016.5_1, ENST00000586633.5_2, ENST00000588049.5_1, ENST00000588315.5_1, ENST00000588767.5_2, ENST00000590194.5_1, ENST00000591006.5_1, ENST00000591151.1_1, ENST00000592372.5_1, ENST00000592857.5_2, ENST00000593166.1_1	SLC25A39	nonsense_mediated_decay, protein_coding, retained_intron	SLC25A39	286.98	283.15	291.09	232.29	226.45	258.64	248.09	256.72	249.08	4006	0.420455	3.69705	0.000218116	0.0026826	4006	-0.0433237	-0.38047	0.703596	0.999983
ENSG00000013364.19_4	19	16	[ENST00000357402.10_2, ENST00000395353.5_1, ENST00000562463.5_1, ENST00000563096.1_1, ENST00000563123.1_1, ENST00000563558.5_1, ENST00000563915.5_1, ENST00000565164.1_1, ENST00000565830.5_1, ENST00000566066.5_1, ENST00000566252.1_1, ENST00000566554.1_1, ENST00000566859.5_1, ENST00000568068.1_1, ENST00000569612.1_1, ENST00000569887.1_1, ENST00000570061.1_1, ENST00000570234.5_1, ENST00000629059.1_1]	chr16:29831714-29859360	+	-	20	27646	6141	1224	4917	0.800684	ENST00000320330.8_2, ENST00000357402.10_2, ENST00000395353.5_1, ENST00000562285.1_1, ENST00000562463.5_1, ENST00000563096.1_1, ENST00000563123.1_1, ENST00000563558.5_1, ENST00000563915.5_1, ENST00000565164.1_1, ENST00000565830.5_1, ENST00000566066.5_1, ENST00000566252.1_1, ENST00000566554.1_1, ENST00000566859.5_1, ENST00000568068.1_1, ENST00000569612.1_1, ENST00000569887.1_1, ENST00000570061.1_1,…	AC120114.4, MVP, PAGR1	lncRNA, nonsense_mediated_decay, protein_coding, retained_intron	PAGR1, CTD-2574D22.6, MVP	9.68	6.66	6.04	4.61	2.52	4.83	3.77	3.43	4.21	71.471	1.20531	3.48521	0.00049175	0.00497072	71.471	0.0894536	0.25337	0.799982	0.999983
ENSG00000013374.16_6	12	11	[ENST00000413040.6_2, ENST00000460712.1_3, ENST00000468404.5_1, ENST00000470229.6_3, ENST00000470316.5_1, ENST00000477666.1_1, ENST00000480714.1_3, ENST00000480907.5_1, ENST00000483358.5_3, ENST00000493588.5_1, ENST00000497987.1_1, ENST00000568733.5_2]	chr7:151038784-151075535	+	-	18	36751	5411	705	4706	0.86971	ENST00000413040.6_2, ENST00000460712.1_3, ENST00000468404.5_1, ENST00000470229.6_3, ENST00000470316.5_1, ENST00000477666.1_1, ENST00000480714.1_3, ENST00000480907.5_1, ENST00000483358.5_3, ENST00000493588.5_1, ENST00000497987.1_1, ENST00000568733.5_2	NUB1	lncRNA, nonsense_mediated_decay, protein_coding, retained_intron	NUB1	9.43	11.05	8.4	9.7	12.39	10.83	10.88	11.82	8.64	253.651	0.116081	0.717049	0.473344	0.652229	253.651	0.105453	0.65615	0.511728	0.999983
ENSG00000013375.16_6	22	20	[ENST00000283977.9_2, ENST00000503094.1_3, ENST00000504780.5_2, ENST00000505470.5_1, ENST00000506587.5_1, ENST00000507404.1_1, ENST00000507554.1_3, ENST00000508748.5_3, ENST00000509219.2_4, ENST00000510258.1_4, ENST00000512866.5_1, ENST00000513973.6_2, ENST00000515333.1_1, ENST00000605602.1_3, ENST00000616566.5_2, ENST00000650640.1_1, ENST00000650642.1_1, ENST00000651204.1_1, ENST00000651425.1_1,…	chr6:83870868-83903655	-	-	17	32787	7478	1437	6041	0.807836	ENST00000283977.9_2, ENST00000503094.1_3, ENST00000504780.5_2, ENST00000505470.5_1, ENST00000506587.5_1, ENST00000507404.1_1, ENST00000507554.1_3, ENST00000508748.5_3, ENST00000509219.2_4, ENST00000510258.1_4, ENST00000512866.5_1, ENST00000513973.6_2, ENST00000515333.1_1, ENST00000605602.1_3, ENST00000616566.5_2, ENST00000650640.1_1, ENST00000650642.1_1, ENST00000651204.1_1, ENST00000651425.1_1, …	PGM3	nonsense_mediated_decay, protein_coding, retained_intron	PGM3	5.17	5.94	3.66	7.84	7.22	7.39	4.39	9.54	5.3	150.108	-0.130559	-0.484891	0.627754	0.771214	150.108	0.280677	1.05089	0.293308	0.999983
ENSG00000013392.8_3	1	1	[ENST00000369724.5_2]	chr6:83903075-83908654	+	-	3	5579	3769	240	3529	0.936323	ENST00000369724.5_2	RWDD2A	protein_coding	RWDD2A	1.76	2.35	1.99	1.87	1.66	2.14	1.41	2.14	1.57	89.3762	0.481835	2.00094	0.0453983	0.139653	89.3762	0.188175	0.778157	0.436477	0.999983
ENSG00000013441.16_4	15	14	[ENST00000321356.9_2, ENST00000409403.6_1, ENST00000409769.6_1, ENST00000432425.5_1, ENST00000434813.3_1, ENST00000461326.1_1, ENST00000461981.5_1, ENST00000464454.1_1, ENST00000472679.1_1, ENST00000473565.5_1, ENST00000481641.1_1, ENST00000482590.1_1, ENST00000492793.1_1, ENST00000496205.1_1, ENST00000621181.4_2]	chr2:201717731-201729467	-	-	10	11736	5170	357	4813	0.930948	ENST00000321356.9_2, ENST00000409403.6_1, ENST00000409769.6_1, ENST00000432425.5_1, ENST00000434813.3_1, ENST00000461326.1_1, ENST00000461981.5_1, ENST00000464454.1_1, ENST00000472679.1_1, ENST00000473565.5_1, ENST00000481641.1_1, ENST00000482590.1_1, ENST00000492793.1_1, ENST00000496205.1_1, ENST00000621181.4_2	CLK1	lncRNA, nonsense_mediated_decay, protein_coding, retained_intron	CLK1	6.26	7.54	5.46	9.02	13.43	9.77	10.97	13.5	6.03	267.16	-0.40866	-1.79221	0.0730993	0.193268	267.16	0.128457	0.568719	0.569547	0.999983
ENSG00000013503.10_3	4	4	[ENST00000228347.9_2, ENST00000539066.5_1, ENST00000549195.1_1, ENST00000549569.1_1]	chr12:106751525-106903976	+	-	31	152451	4768	149	4619	0.96875	ENST00000228347.9_2, ENST00000539066.5_1, ENST00000549195.1_1, ENST00000549569.1_1	POLR3B	lncRNA, protein_coding	POLR3B	1.25	1.65	1.9	2.94	3.81	2.71	2.89	3.71	1.88	128.89	-0.57983	-2.40003	0.0163938	0.0674806	128.89	0.20044	0.85872	0.390495	0.999983
ENSG00000013523.9_4	6	6	[ENST00000251089.6_2, ENST00000554941.1_1, ENST00000555079.1_1, ENST00000556298.1_1, ENST00000557179.5_1, ENST00000557497.1_2]	chr14:77252520-77292589	-	-	14	40069	6414	393	6021	0.938728	ENST00000251089.6_2, ENST00000554941.1_1, ENST00000555079.1_1, ENST00000556072.2_1, ENST00000556298.1_1, ENST00000557179.5_1, ENST00000557497.1_2	ANGEL1, VASH1-AS1	lncRNA, protein_coding	ANGEL1	18.69	22.05	19.55	25.27	22.02	23.58	18.89	20.64	23.22	770.529	0.162957	1.03802	0.299263	0.489568	770.529	0.203647	1.29944	0.193793	0.95733
ENSG00000013561.18_5	16	14	[ENST00000347642.7_1, ENST00000356143.5_1, ENST00000394514.6_1, ENST00000394519.5_1, ENST00000394520.7_2, ENST00000502341.5_1, ENST00000506004.5_1, ENST00000506822.5_1, ENST00000506938.5_1, ENST00000507163.5_1, ENST00000507291.1_3, ENST00000511961.5_1, ENST00000512565.5_1, ENST00000513019.5_1, ENST00000514620.5_1, ENST00000515613.5_1]	chr5:141337892-141369857	+	-	12	31965	4988	300	4688	0.939856	ENST00000347642.7_1, ENST00000356143.5_1, ENST00000394514.6_1, ENST00000394519.5_1, ENST00000394520.7_2, ENST00000502341.5_1, ENST00000506004.5_2, ENST00000506822.5_2, ENST00000506938.5_2, ENST00000507163.5_2, ENST00000507291.1_3, ENST00000511961.5_2, ENST00000512565.5_1, ENST00000513019.5_2, ENST00000514620.5_1, ENST00000515613.5_1	RNF14	lncRNA, nonsense_mediated_decay, protein_coding	RNF14	9.18	10.74	8.98	16.91	21.62	18.51	16.68	20.26	12.36	219.601	-0.530313	-3.04634	0.00231649	0.0163301	219.601	0.24924	1.48424	0.137746	0.897232
ENSG00000013563.14_4	12	11	[ENST00000014935.7_3, ENST00000309585.9_1, ENST00000369807.6_3, ENST00000369808.7_3, ENST00000369809.5_1, ENST00000393638.5_1, ENST00000412184.1_3, ENST00000424626.5_3, ENST00000432135.1_2, ENST00000447892.1_3, ENST00000451865.5_3, ENST00000497242.1_1]	chrX:153629576-153640449	-	-	11	10873	4130	80	4050	0.98063	ENST00000014935.7_4, ENST00000309585.9_1, ENST00000369807.6_3, ENST00000369808.7_4, ENST00000369809.5_1, ENST00000393638.5_1, ENST00000412184.1_4, ENST00000424626.5_4, ENST00000432135.1_2, ENST00000447892.1_4, ENST00000451865.5_4, ENST00000497242.1_1	DNASE1L1	protein_coding, retained_intron	DNASE1L1	26.1	19.45	23.96	18.71	18.44	18.66	18.19	20.81	18.09	429.159	0.523376	3.25921	0.00111724	0.00938425	429.159	0.00133194	0.0082907	0.993385	0.999983
ENSG00000013573.17_5	30	27	[ENST00000228264.10_1, ENST00000350437.8_2, ENST00000415475.6_1, ENST00000435753.6_1, ENST00000438391.6_1, ENST00000535158.5_1, ENST00000535317.5_1, ENST00000536265.5_1, ENST00000536580.5_1, ENST00000537136.1_1, ENST00000538345.1_1, ENST00000538740.1_1, ENST00000539049.5_1, ENST00000539673.5_1, ENST00000539699.5_1, ENST00000539702.1_1, ENST00000540935.5_1, ENST00000542129.5_1, ENST00000542242.1_1…	chr12:31226793-31257733	+	-	29	30940	8367	703	7664	0.915979	ENST00000228264.10_1, ENST00000350437.8_2, ENST00000415475.6_1, ENST00000435753.6_1, ENST00000438391.6_1, ENST00000535158.5_1, ENST00000535317.5_1, ENST00000536265.5_1, ENST00000536580.5_1, ENST00000537136.1_1, ENST00000538345.1_1, ENST00000538740.1_1, ENST00000539049.5_1, ENST00000539673.5_1, ENST00000539699.5_1, ENST00000539702.1_1, ENST00000540935.5_1, ENST00000542129.5_1, ENST00000542242.1_1,…	DDX11	lncRNA, nonsense_mediated_decay, protein_coding, retained_intron	DDX11	10.6	12.53	15.95	15.73	12.99	15.6	15.66	14.06	8.98	419.391	0.256568	1.29203	0.196346	0.371914	419.391	0.247838	1.24599	0.21277	0.96867
ENSG00000013583.10_5	5	4	[ENST00000014930.9_2, ENST00000535636.1_3, ENST00000536942.1_1, ENST00000540916.1_1, ENST00000647702.1_1]	chr12:13127803-13153199	-	-	7	25396	3428	364	3064	0.893816	ENST00000014930.9_2, ENST00000535636.1_3, ENST00000536942.1_1, ENST00000540916.1_1, ENST00000647702.1_2	HEBP1	lncRNA, protein_coding	HEBP1	28.83	27.42	31.42	27.91	32.22	31.19	39.75	41.28	34.49	426.339	-0.161059	-1.26957	0.204237	0.381516	426.339	-0.306386	-2.4186	0.0155804	0.433742
ENSG00000013588.8_4	6	6	[ENST00000014914.5_2, ENST00000534831.1_1, ENST00000537783.1_1, ENST00000540125.1_1, ENST00000542056.1_1, ENST00000648791.1_1]	chr12:13043715-13070871	+	-	4	27156	8440	1145	7295	0.864336	ENST00000014914.5_2, ENST00000385082.1, ENST00000534831.1_1, ENST00000537783.1_1, ENST00000540125.1_1, ENST00000542056.1_1, ENST00000648791.1_1	GPRC5A, MIR614	lncRNA, miRNA, protein_coding, retained_intron	GPRC5A	115	121.16	88.03	56.24	48.87	55.53	41.29	36.58	42.53	4258	1.64983	9.7463	1.91322e-22	1.58391e-19	4258	0.438751	2.58781	0.0096589	0.337779
ENSG00000013619.14_5	7	6	[ENST00000262858.7_1, ENST00000358892.7_4, ENST00000370401.6_1, ENST00000426613.4_1, ENST00000432680.7_2, ENST00000464149.1_1, ENST00000468306.1_1]	chrX:149529688-149682448	+	-	11	152760	5958	636	5322	0.893253	ENST00000262858.7_1, ENST00000358892.7_5, ENST00000370401.6_1, ENST00000426613.4_1, ENST00000432680.7_2, ENST00000464149.1_1, ENST00000468306.1_1	MAMLD1	lncRNA, protein_coding, retained_intron	MAMLD1	6.71	8.28	8.36	7.89	7.59	8.07	7.64	6.19	7.88	418.206	0.318955	1.83024	0.0672137	0.182778	418.206	0.137535	0.788845	0.430203	0.999983
ENSG00000013725.14_3	14	11	[ENST00000313421.11_2, ENST00000344931.9_1, ENST00000352009.9_1, ENST00000419282.2_1, ENST00000433107.6_1, ENST00000452451.6_1, ENST00000505761.2_1, ENST00000538288.1_1, ENST00000538611.1_1, ENST00000541964.1_1, ENST00000542157.5_1, ENST00000542254.5_1, ENST00000545105.5_1, ENST00000545320.1_1]	chr11:60739151-60787849	+	-	15	48698	5958	959	4999	0.83904	ENST00000313421.11_2, ENST00000344931.9_1, ENST00000352009.9_1, ENST00000419282.2_1, ENST00000433107.6_1, ENST00000452451.6_1, ENST00000505761.2_1, ENST00000538288.1_1, ENST00000538611.1_1, ENST00000541964.1_1, ENST00000542157.5_1, ENST00000542254.5_1, ENST00000545105.5_1, ENST00000545320.1_1	CD6	lncRNA, nonsense_mediated_decay, protein_coding, retained_intron	CD6	0	0	0	0	0	0	0	0	0
ENSG00000013810.19_4	18	18	[ENST00000313288.9_2, ENST00000404054.3_1, ENST00000458173.4_4, ENST00000466077.1_1, ENST00000467746.6_2, ENST00000470136.2_4, ENST00000470808.1_1, ENST00000484264.1_1, ENST00000484651.5_1, ENST00000485989.6_3, ENST00000493975.5_2, ENST00000612220.4_1, ENST00000617535.4_1, ENST00000650779.1_1, ENST00000651251.1_1, ENST00000651472.1_1, ENST00000651817.1_1, ENST00000652770.1_1]	chr4:1714617-1746903	+	-	18	32286	8202	1324	6878	0.838576	ENST00000313288.9_2, ENST00000404054.3_1, ENST00000458173.4_4, ENST00000466077.1_1, ENST00000467746.6_2, ENST00000470136.2_4, ENST00000470808.1_1, ENST00000484264.1_1, ENST00000484651.5_1, ENST00000485989.6_3, ENST00000493975.5_2, ENST00000605571.1_2, ENST00000612220.4_1, ENST00000617535.4_1, ENST00000650779.1_1, ENST00000651251.1_1, ENST00000651472.1_1, ENST00000651817.1_1, ENST00000652002.1_1, …	AC016773.1, TACC3	lncRNA, nonsense_mediated_decay, protein_coding, retained_intron	TACC3	18.1	27.57	31.07	31.1	26.84	29.93	30.97	29.96	38	553.818	-0.161429	-0.788092	0.430643	0.616801	553.818	-0.149986	-0.733543	0.463227	0.999983
ENSG00000014123.10_3	2	2	[ENST00000369278.5_2, ENST00000461673.1_1]	chr6:96969470-97003152	+	-	20	33682	4539	0	4539	1	ENST00000369278.5_2, ENST00000461673.1_1	UFL1	lncRNA, protein_coding	UFL1	1.81	2.71	2	3.33	4.51	3.99	4.15	4.27	3.1	172.84	-0.591154	-3.05829	0.00222607	0.0158189	172.84	0.0722634	0.387506	0.698382	0.999983
ENSG00000014138.9_5	8	8	[ENST00000265465.8_2, ENST00000525924.1_3, ENST00000527618.5_1, ENST00000527850.5_1, ENST00000532391.1_1, ENST00000532469.1_1, ENST00000533192.1_1, ENST00000534785.1_1]	chr11:65029390-65073060	+	-	19	43670	5568	898	4670	0.838721	ENST00000265465.8_2, ENST00000525924.1_3, ENST00000527618.5_1, ENST00000527850.5_1, ENST00000532391.1_1, ENST00000532469.1_1, ENST00000533192.1_1, ENST00000534785.1_1, ENST00000649896.1_1	AP000944.2, POLA2	lncRNA, nonsense_mediated_decay, protein_coding, retained_intron	POLA2	24.73	31.18	34.25	45.3	36.32	46.37	41.11	46.29	56.7	712.157	-0.466701	-2.41495	0.0157376	0.0657339	712.157	-0.149677	-0.777005	0.437156	0.999983
ENSG00000014164.7_3	2	2	[ENST00000262577.6_2, ENST00000528401.1_1]	chr8:144519828-144623617	-	-	13	103789	3721	0	3721	1	ENST00000262577.6_2, ENST00000528401.1_1	ZC3H3	protein_coding	ZC3H3	8.7	8.42	8.27	9.31	8.51	11.17	8.39	9.45	11.49	381.306	0.0134	0.0694167	0.944658	0.968794	381.306	0.00441165	0.0229292	0.981707	0.999983
ENSG00000014216.15_6	28	26	[ENST00000279247.10_1, ENST00000524773.5_1, ENST00000525013.1_1, ENST00000526468.1_1, ENST00000526954.5_1, ENST00000526966.5_1, ENST00000527189.5_1, ENST00000527323.5_1, ENST00000527469.1_1, ENST00000527699.5_1, ENST00000527739.5_1, ENST00000527887.1_1, ENST00000527897.1_1, ENST00000528165.5_1, ENST00000528396.5_4, ENST00000528739.5_2, ENST00000529133.5_4, ENST00000530442.5_1, ENST00000530495.1_1…	chr11:64948036-64979477	+	-	24	31441	7553	756	6797	0.899907	ENST00000279247.10_1, ENST00000524773.5_1, ENST00000525013.1_1, ENST00000526468.1_1, ENST00000526954.5_1, ENST00000526966.5_1, ENST00000527189.5_1, ENST00000527323.5_1, ENST00000527469.1_1, ENST00000527699.5_1, ENST00000527739.5_1, ENST00000527887.1_1, ENST00000527897.1_1, ENST00000528165.5_1, ENST00000528396.5_4, ENST00000528739.5_2, ENST00000529133.5_4, ENST00000530442.5_1, ENST00000530495.1_1,…	CAPN1	lncRNA, nonsense_mediated_decay, protein_coding, retained_intron	CAPN1	137.75	134.97	153.41	112.11	112.56	125.32	112.59	122.04	132	1184.22	0.44053	3.14944	0.00163582	0.012393	1184.22	-0.0434105	-0.309787	0.756723	0.999983
ENSG00000014257.16_3	9	8	[ENST00000336375.10_2, ENST00000351273.11_1, ENST00000475741.5_1, ENST00000483689.1_1, ENST00000489084.5_1, ENST00000493235.5_1, ENST00000495911.5_1, ENST00000507647.1_1, ENST00000512463.1_1]	chr3:132036212-132087142	+	-	12	50930	4280	455	3825	0.893692	ENST00000336375.10_2, ENST00000351273.11_1, ENST00000475741.5_1, ENST00000483689.1_1, ENST00000489084.5_1, ENST00000493235.5_1, ENST00000495911.5_1, ENST00000507647.1_1, ENST00000512463.1_1	ACPP	lncRNA, protein_coding, retained_intron	ACPP	2.44	4.65	2.02	2.35	1.28	2.44	1.66	2.18	1.27	22.9259	1.02533	2.07866	0.0376489	0.122832	22.9259	0.275228	0.535917	0.592016	0.999983
ENSG00000014641.18_3	16	13	[ENST00000233114.13_2, ENST00000409476.5_1, ENST00000409908.5_1, ENST00000421012.1_1, ENST00000432309.5_1, ENST00000436321.5_1, ENST00000442225.5_1, ENST00000454035.5_1, ENST00000462944.1_1, ENST00000472098.5_1, ENST00000484538.1_1, ENST00000485155.1_1, ENST00000485781.5_1, ENST00000495083.1_1, ENST00000539945.5_1, ENST00000544381.3_1]	chr2:63815742-63834331	+	-	13	18589	4990	498	4492	0.9002	ENST00000233114.13_2, ENST00000409476.5_1, ENST00000409908.5_1, ENST00000421012.1_1, ENST00000432309.5_1, ENST00000436321.5_1, ENST00000442225.5_1, ENST00000454035.5_1, ENST00000462944.1_1, ENST00000472098.5_1, ENST00000484538.1_1, ENST00000485155.1_1, ENST00000485781.5_1, ENST00000495083.1_1, ENST00000539945.5_1, ENST00000544381.3_1	MDH1	lncRNA, nonsense_mediated_decay, protein_coding, retained_intron	MDH1	49.71	55.97	53.09	72.75	78.05	76.58	77.42	80.23	72.58	954.183	-0.305835	-3.01004	0.00261216	0.017744	954.183	0.0129273	0.129088	0.897288	0.999983
ENSG00000014824.14_4	5	5	[ENST00000264451.12_2, ENST00000505523.1_1, ENST00000509683.5_1, ENST00000510460.1_1, ENST00000513699.5_1]	chr4:41992518-42092478	+	-	20	99960	7199	1215	5984	0.831227	ENST00000264451.12_2, ENST00000505523.1_1, ENST00000509683.5_1, ENST00000510460.1_1, ENST00000513699.5_1	SLC30A9	nonsense_mediated_decay, protein_coding, retained_intron	SLC30A9	3.47	3.71	2.64	3.1	5.62	3.87	4.88	7.15	3.69	134.391	-0.432643	-1.67141	0.0946415	0.229611	134.391	-0.284213	-1.11899	0.263144	0.999983
ENSG00000014914.21_3	10	9	[ENST00000369140.7_2, ENST00000439741.4_3, ENST00000466496.5_1, ENST00000479272.1_1, ENST00000482025.5_1, ENST00000482343.5_1, ENST00000490310.1_1, ENST00000492824.5_1, ENST00000493562.1_1, ENST00000495054.1_1]	chr1:149900542-149908772	-	-	13	8230	4572	0	4572	1	ENST00000369140.7_2, ENST00000439741.4_3, ENST00000466496.5_1, ENST00000479272.1_1, ENST00000482025.5_1, ENST00000482343.5_1, ENST00000490310.1_1, ENST00000492824.5_1, ENST00000493562.1_1, ENST00000495054.1_1	MTMR11	lncRNA, protein_coding, retained_intron	MTMR11	9.9	13.09	15.12	9.05	8.24	8.58	9.98	9.73	9.4	217.628	0.61069	3.32388	0.00088775	0.00788738	217.628	-0.138908	-0.742749	0.457633	0.999983
ENSG00000014919.12_3	3	2	[ENST00000016171.5_1, ENST00000370483.9_1, ENST00000497381.1_1]	chr10:101471600-101491857	-	-	10	20257	4177	1832	2345	0.561408	ENST00000016171.5_1, ENST00000370483.9_1, ENST00000497381.1_1, ENST00000649102.1_1	AL133353.2, COX15	nonsense_mediated_decay, protein_coding, retained_intron	COX15	8.83	11.89	11.07	12.03	15.21	15.33	13.04	15.52	10.74	398.01	-0.0721424	-0.502539	0.615289	0.762859	398.01	0.151999	1.07176	0.283826	0.999983
ENSG00000015133.19_3	14	14	[ENST00000331194.8_1, ENST00000334448.5_1, ENST00000389856.9_1, ENST00000389857.11_2, ENST00000553403.1_1, ENST00000553437.1_1, ENST00000554051.1_1, ENST00000554165.1_1, ENST00000554872.5_1, ENST00000555995.1_1, ENST00000556726.5_1, ENST00000556767.1_1, ENST00000557455.1_1, ENST00000557507.1_1]	chr14:91737666-91884188	-	-	35	146522	12426	794	11632	0.936102	ENST00000331194.8_1, ENST00000334448.5_1, ENST00000389856.9_1, ENST00000389857.11_2, ENST00000553403.1_1, ENST00000553437.1_1, ENST00000554051.1_1, ENST00000554165.1_1, ENST00000554872.5_1, ENST00000555995.1_1, ENST00000556726.5_1, ENST00000556767.1_1, ENST00000557455.1_1, ENST00000557507.1_1	CCDC88C	lncRNA, protein_coding, retained_intron	CCDC88C	9.51	6.68	9.27	14.53	9.25	14.63	12.92	13.36	12.64	342.314	-0.378759	-1.66868	0.0951803	0.230222	342.314	0.0164857	0.0730329	0.94178	0.999983
ENSG00000015153.14_3	19	15	[ENST00000327791.8_2, ENST00000380790.4_1, ENST00000534854.6_2, ENST00000541702.2_1, ENST00000546726.5_1, ENST00000546782.1_1, ENST00000546972.5_1, ENST00000547254.5_1, ENST00000547351.5_1, ENST00000547622.5_1, ENST00000547724.1_1, ENST00000548661.5_1, ENST00000548917.1_1, ENST00000550315.1_1, ENST00000551268.5_1, ENST00000551528.5_1, ENST00000552109.5_1, ENST00000552928.5_1, ENST00000555248.2_1]	chr12:42550905-42632151	-	-	10	81246	10839	2941	7898	0.728665	ENST00000327791.8_2, ENST00000380790.4_1, ENST00000534854.6_2, ENST00000541702.2_1, ENST00000546726.5_1, ENST00000546782.1_1, ENST00000546972.5_1, ENST00000547254.5_1, ENST00000547351.5_1, ENST00000547622.5_1, ENST00000547724.1_1, ENST00000548661.5_1, ENST00000548917.1_1, ENST00000550315.1_1, ENST00000551268.5_1, ENST00000551528.5_1, ENST00000552109.5_1, ENST00000552928.5_1, ENST00000555248.2_1	YAF2	lncRNA, nonsense_mediated_decay, protein_coding, retained_intron	YAF2	4.37	5.03	6.04	4.96	7.45	6.87	7.91	10.21	7.45	83.4791	-0.494396	-2.02746	0.0426155	0.133574	83.4791	-0.373239	-1.58278	0.113472	0.860048
ENSG00000015171.19_3	17	12	[ENST00000309776.8_1, ENST00000381584.5_2, ENST00000381591.5_1, ENST00000381604.8_1, ENST00000381607.8_1, ENST00000397955.6_3, ENST00000397959.7_1, ENST00000397962.8_2, ENST00000402736.5_1, ENST00000403354.5_1, ENST00000439456.5_1, ENST00000473115.1_1, ENST00000488275.1_1, ENST00000509513.6_1, ENST00000558098.4_1, ENST00000602682.5_1, ENST00000627286.1_2]	chr10:180404-300577	+	-	20	120173	5300	0	5300	1	ENST00000309776.8_1, ENST00000381584.5_2, ENST00000381591.5_1, ENST00000381604.8_1, ENST00000381607.8_1, ENST00000397955.6_3, ENST00000397959.7_1, ENST00000397962.8_2, ENST00000402736.5_1, ENST00000403354.5_1, ENST00000439456.5_1, ENST00000473115.1_1, ENST00000488275.1_1, ENST00000509513.6_1, ENST00000558098.4_1, ENST00000602682.5_1, ENST00000627286.1_2	ZMYND11	lncRNA, protein_coding, retained_intron	ZMYND11	21.03	23.57	15.95	19.35	33.56	28.31	35.28	44.31	20.89	925.33	-0.469284	-2.14486	0.0319637	0.109687	925.33	-0.25907	-1.1882	0.234753	0.988696
ENSG00000015285.10_2	7	7	[ENST00000376701.4_1, ENST00000450772.5_1, ENST00000465982.5_1, ENST00000470107.1_1, ENST00000474174.1_1, ENST00000483750.5_1, ENST00000490627.1_1]	chrX:48534984-48549818	+	-	14	14834	2381	96	2285	0.959681	ENST00000376701.4_1, ENST00000450772.5_1, ENST00000465982.5_1, ENST00000470107.1_1, ENST00000474174.1_1, ENST00000483750.5_1, ENST00000490627.1_1	WAS	lncRNA, protein_coding	WAS	3.28	1.4	1.33	1.3	1.73	1.23	1.53	1.87	2.04	29.9299	0.366607	0.807987	0.419098	0.606111	29.9299	-0.338499	-0.739022	0.459894	0.999983
ENSG00000015413.9_5	9	8	[ENST00000261615.5_1, ENST00000393092.7_1, ENST00000421184.5_1, ENST00000561484.1_1, ENST00000564281.5_1, ENST00000564645.1_1, ENST00000565249.5_1, ENST00000568281.5_3, ENST00000570029.5_3]	chr16:89679715-89704864	+	-	12	25149	2737	101	2636	0.963098	ENST00000261615.5_1, ENST00000393092.7_1, ENST00000421184.5_1, ENST00000561484.1_1, ENST00000564281.5_1, ENST00000564645.1_1, ENST00000565249.5_1, ENST00000568281.5_3, ENST00000570029.5_3	DPEP1	protein_coding, retained_intron	DPEP1	0	0	0	0	0	0	0	0	0
ENSG00000015475.18_4	15	9	[ENST00000317361.11_2, ENST00000342111.9_3, ENST00000399765.5_1, ENST00000399767.5_1, ENST00000399774.7_2, ENST00000473439.5_1, ENST00000494097.5_1, ENST00000550946.5_1, ENST00000551952.5_2, ENST00000552886.1_1, ENST00000611040.1_1, ENST00000614949.4_1, ENST00000615414.4_1, ENST00000617586.1_1, ENST00000622694.4_2]	chr22:18216903-18257536	-	-	9	40633	4446	795	3651	0.821188	ENST00000317361.11_2, ENST00000342111.9_3, ENST00000399765.5_1, ENST00000399767.5_1, ENST00000399774.7_2, ENST00000473439.5_1, ENST00000494097.5_1, ENST00000550946.5_1, ENST00000551952.5_2, ENST00000552886.1_1, ENST00000611040.1_1, ENST00000614949.4_1, ENST00000615414.4_1, ENST00000617586.1_1, ENST00000622694.4_2	BID	lncRNA, protein_coding, retained_intron	BID	8.04	12.74	11.3	12.47	16.77	13.38	14.48	16.24	13.49	232.797	-0.245931	-1.37241	0.169936	0.336478	232.797	-0.0216564	-0.123115	0.902016	0.999983
ENSG00000015479.18_6	28	27	[ENST00000394805.7_1, ENST00000502422.5_1, ENST00000502499.5_1, ENST00000502944.1_1, ENST00000503340.1_1, ENST00000503811.5_1, ENST00000504023.1_1, ENST00000504045.5_1, ENST00000504311.5_1, ENST00000504643.5_1, ENST00000505625.5_1, ENST00000507860.1_1, ENST00000508689.1_1, ENST00000509918.5_1, ENST00000510056.5_1, ENST00000511249.5_1, ENST00000511333.5_1, ENST00000511978.5_1, ENST00000512040.1_1,…	chr5:138629336-138667366	+	-	14	38030	12090	1895	10195	0.843259	ENST00000361059.7_2, ENST00000394800.6_2, ENST00000394805.7_1, ENST00000502394.1_3, ENST00000502422.5_1, ENST00000502499.5_1, ENST00000502929.5_2, ENST00000502944.1_1, ENST00000503340.1_1, ENST00000503811.5_1, ENST00000504023.1_1, ENST00000504045.5_1, ENST00000504203.5_2, ENST00000504311.5_1, ENST00000504643.5_1, ENST00000505016.2_4, ENST00000505625.5_1, ENST00000506147.5_5, ENST00000507860.1_1, …	MATR3	lncRNA, protein_coding, retained_intron	MATR3	14.69	18.57	21.11	20.31	27.2	26.32	28.41	33.87	17.24	563.705	-0.302211	-1.6407	0.100859	0.239766	563.705	-0.0594324	-0.324727	0.745388	0.999983
ENSG00000015520.14_5	4	1	[ENST00000289547.8_3, ENST00000381160.7_3, ENST00000423141.1_1, ENST00000546276.5_4]	chr7:44552133-44580914	-	-	20	28781	5252	81	5171	0.984577	ENST00000289547.8_3, ENST00000381160.7_3, ENST00000423141.1_1, ENST00000546276.5_4	NPC1L1	protein_coding	NPC1L1	0.15	0.18	0.13	0.12	0.14	0.12	0.1	0.03	0.05	6.91338	1.60284	1.97329	0.0484629	NA	6.91338	1.0865	1.31968	0.186941	0.953815
ENSG00000015532.9_2	7	7	[ENST00000017003.6_1, ENST00000376550.7_1, ENST00000507602.5_1, ENST00000509778.1_1, ENST00000511654.1_1, ENST00000571021.1_1, ENST00000574840.1_1]	chr17:48423452-48440499	+	-	12	17047	5472	459	5013	0.916118	ENST00000017003.6_1, ENST00000376550.7_1, ENST00000507602.5_1, ENST00000509778.1_1, ENST00000511654.1_1, ENST00000571021.1_1, ENST00000574840.1_1	XYLT2	nonsense_mediated_decay, protein_coding, retained_intron	XYLT2	7.06	6.27	8.48	5.56	6.72	6.51	7.06	7.75	8.46	210.17	0.140399	0.738869	0.459986	0.640834	210.17	-0.277219	-1.45465	0.145765	0.907721
ENSG00000015568.13_3	13	12	[ENST00000016946.8_2, ENST00000272454.10_1, ENST00000393283.5_1, ENST00000413468.1_1, ENST00000430736.5_1, ENST00000432606.1_1, ENST00000441344.1_1, ENST00000472794.1_1, ENST00000477523.1_1, ENST00000482778.1_1, ENST00000493394.1_1, ENST00000495473.1_1, ENST00000495582.1_1]	chr2:110550334-110615282	+	-	27	64948	14185	2467	11718	0.826084	ENST00000016946.8_2, ENST00000272454.10_1, ENST00000393283.5_1, ENST00000413468.1_1, ENST00000430736.5_1, ENST00000432606.1_1, ENST00000441344.1_1, ENST00000472794.1_1, ENST00000477523.1_1, ENST00000482778.1_1, ENST00000493394.1_1, ENST00000495473.1_1, ENST00000495582.1_1	RGPD5	lncRNA, nonsense_mediated_decay, protein_coding, retained_intron	RGPD5	1.71	1.98	1.24	2.63	2.24	0.8	2.82	3.59	1.53	76.3232	-0.444328	-1.1206	0.262456	0.45042	76.3232	-0.421644	-1.08002	0.280132	0.999983
ENSG00000015592.16_3	7	6	[ENST00000265770.11_2, ENST00000350889.8_2, ENST00000519614.5_1, ENST00000519997.5_1, ENST00000522750.1_1, ENST00000522908.1_1, ENST00000523048.5_1]	chr8:27092839-27115937	-	-	8	23098	3294	363	2931	0.8898	ENST00000265770.11_2, ENST00000350889.8_2, ENST00000519614.5_1, ENST00000519997.5_1, ENST00000522750.1_1, ENST00000522908.1_1, ENST00000523048.5_1	STMN4	protein_coding, retained_intron	STMN4	0	0.09	0.06	0	0.13	0	0	0	0	0.469731	2.19549	0.631392	0.527784	NA	0.469731	1.71864	0.492491	0.622372	NA
ENSG00000015676.18_3	11	11	[ENST00000338427.10_1, ENST00000355451.8_2, ENST00000460110.5_1, ENST00000464812.1_1, ENST00000472246.5_1, ENST00000475952.1_1, ENST00000478769.1_1, ENST00000480209.1_1, ENST00000487118.1_1, ENST00000493613.5_1, ENST00000497978.1_1]	chr7:44418717-44530257	-	-	14	111540	9893	723	9170	0.926918	ENST00000338427.10_1, ENST00000355451.8_2, ENST00000460110.5_1, ENST00000464812.1_1, ENST00000472246.5_1, ENST00000475952.1_1, ENST00000478769.1_1, ENST00000480209.1_1, ENST00000487118.1_1, ENST00000493613.5_1, ENST00000497978.1_1	NUDCD3	lncRNA, protein_coding, retained_intron	NUDCD3	9.1	13.66	10.3	11.42	13.22	13.03	12.51	16.54	10.39	425.914	-0.0168146	-0.105375	0.916079	0.953362	425.914	-0.0213123	-0.134223	0.893227	0.999983
ENSG00000016082.15_3	3	3	[ENST00000230658.12_2, ENST00000505475.3_1, ENST00000511384.1_1]	chr5:50679281-50690564	+	-	7	11283	2817	0	2817	1	ENST00000230658.12_2, ENST00000505475.3_1, ENST00000511384.1_1	ISL1	lncRNA, protein_coding	ISL1	0.17	0.09	0	0.57	0.35	0.13	0.33	0.26	0.58	5.91735	-1.95382	-1.82038	0.0687019	NA	5.91735	-0.159172	-0.175818	0.860437	0.999983
ENSG00000016391.11_5	3	3	[ENST00000315251.11_2, ENST00000467802.1_3, ENST00000481668.5_1]	chr3:53846361-53880446	-	-	11	34085	7787	584	7203	0.925003	ENST00000315251.11_2, ENST00000467802.1_3, ENST00000481668.5_1	CHDH	protein_coding	CHDH	0.68	1.03	0.96	1.08	1.01	1.17	1.16	1.2	0.79	98.98	-0.00583178	-0.0250641	0.980004	0.988668	98.98	0.0950921	0.414183	0.67874	0.999983
ENSG00000016402.13_3	8	5	[ENST00000316649.9_1, ENST00000367746.3_1, ENST00000367748.4_1, ENST00000460306.1_1, ENST00000461799.1_1, ENST00000468393.5_3, ENST00000541547.5_1, ENST00000635289.1_1]	chr6:137321107-137366317	-	-	10	45210	4730	269	4461	0.943129	ENST00000316649.9_1, ENST00000367746.3_1, ENST00000367748.4_1, ENST00000460306.1_1, ENST00000461799.1_1, ENST00000468393.5_3, ENST00000541547.5_1, ENST00000635289.1_1	IL20RA	lncRNA, nonsense_mediated_decay, protein_coding	IL20RA	0.13	0.02	0.45	0.6	0.27	0.02	0.03	0	0	3.58251	3.98378	2.25058	0.0244122	NA	3.58251	4.27114	2.41007	0.0159494	NA
ENSG00000016490.15_2	2	2	[ENST00000234701.7_1, ENST00000394711.1_1]	chr1:86934050-86965972	+	-	15	31922	3340	0	3340	1	ENST00000234701.7_1, ENST00000394711.1_1	CLCA1	protein_coding	CLCA1	0	0	0	0	0	0	0	0	0
ENSG00000016602.9_3	2	2	[ENST00000370563.3_2, ENST00000496322.1_1]	chr1:87012760-87046437	+	-	14	33677	3447	0	3447	1	ENST00000370563.3_2, ENST00000496322.1_1	CLCA4	lncRNA, protein_coding	CLCA4	0	0	0	0	0	0	0	0	0
ENSG00000016864.18_5	15	15	[ENST00000266014.10_2, ENST00000394783.7_1, ENST00000463762.1_1, ENST00000463827.1_1, ENST00000464705.1_2, ENST00000478968.6_1, ENST00000479553.5_2, ENST00000480080.1_1, ENST00000481643.5_1, ENST00000484163.5_1, ENST00000485899.1_1, ENST00000487642.5_5, ENST00000491606.5_2, ENST00000497436.5_2, ENST00000497953.5_3]	chr3:52728503-52740048	-	-	13	11545	3783	338	3445	0.910653	ENST00000266014.10_2, ENST00000394783.7_1, ENST00000463762.1_1, ENST00000463827.1_1, ENST00000464705.1_2, ENST00000478968.6_1, ENST00000479553.5_2, ENST00000480080.1_1, ENST00000481643.5_1, ENST00000484163.5_1, ENST00000485899.1_1, ENST00000487642.5_5, ENST00000491606.5_2, ENST00000497436.5_2, ENST00000497953.5_3	GLT8D1	lncRNA, nonsense_mediated_decay, protein_coding, retained_intron	GLT8D1	7.64	9.24	6.5	8.88	9.65	8.42	10.37	8.81	10.28	112.269	-0.10289	-0.444183	0.656911	0.79212	112.269	-0.0932405	-0.410786	0.681229	0.999983
ENSG00000017260.19_7	24	21	[ENST00000328560.12_4, ENST00000359644.7_1, ENST00000422190.6_4, ENST00000428331.6_2, ENST00000504381.5_1, ENST00000504571.5_1, ENST00000504612.5_1, ENST00000504948.5_2, ENST00000505072.5_4, ENST00000505330.5_1, ENST00000507194.1_2, ENST00000507488.6_1, ENST00000508297.2_4, ENST00000508532.5_2, ENST00000508660.5_1, ENST00000509150.1_1, ENST00000509662.5_1, ENST00000510168.5_2, ENST00000510774.1_1…	chr3:130569438-130735556	+	-	34	166118	8533	650	7883	0.923825	ENST00000328560.12_4, ENST00000359644.7_1, ENST00000422190.6_4, ENST00000428331.6_2, ENST00000504381.5_1, ENST00000504571.5_1, ENST00000504612.5_1, ENST00000504948.5_2, ENST00000505072.5_4, ENST00000505330.5_1, ENST00000507194.1_2, ENST00000507488.6_1, ENST00000508297.2_4, ENST00000508532.5_2, ENST00000508660.5_1, ENST00000509150.1_1, ENST00000509662.5_1, ENST00000510168.5_2, ENST00000510774.1_1,…	ATP2C1	lncRNA, nonsense_mediated_decay, protein_coding, retained_intron	ATP2C1	7.77	13.17	8.59	15.69	19.99	17.96	14.69	17.53	10.46	278.585	-0.299756	-1.51745	0.129154	0.280966	278.585	0.373214	1.92339	0.0544312	0.700627
ENSG00000017427.16_4	7	7	[ENST00000307046.8_2, ENST00000337514.10_2, ENST00000392904.5_1, ENST00000392905.7_2, ENST00000424202.6_3, ENST00000481539.1_1, ENST00000644491.1_1]	chr12:102789651-102875522	-	-	8	85871	8122	531	7591	0.934622	ENST00000307046.8_2, ENST00000337514.10_2, ENST00000392904.5_1, ENST00000392905.7_2, ENST00000424202.6_3, ENST00000481539.1_1, ENST00000644491.1_1	IGF1	lncRNA, protein_coding	IGF1	0.02	0.02	0.15	0.02	0	0.03	0	0.02	0	1.25024	1.90089	0.990599	0.321882	NA	1.25024	0.576049	0.290509	0.771427	NA
ENSG00000017483.15_5	14	13	[ENST00000413668.5_3, ENST00000416711.5_3, ENST00000429543.2_3, ENST00000440085.5_2, ENST00000441948.5_2, ENST00000480105.1_1, ENST00000488083.5_2, ENST00000494034.5_1, ENST00000497336.1_1, ENST00000595796.5_4, ENST00000615300.4_1, ENST00000619100.4_3, ENST00000620913.5_4, ENST00000622196.4_1]	chrX:48316919-48328648	-	-	21	11729	4018	0	4018	1	ENST00000413668.5_4, ENST00000416711.5_3, ENST00000429543.2_4, ENST00000440085.5_3, ENST00000441948.5_2, ENST00000480105.1_1, ENST00000488083.5_3, ENST00000494034.5_2, ENST00000497336.1_1, ENST00000595796.5_4, ENST00000615300.4_1, ENST00000619100.4_3, ENST00000620913.5_4, ENST00000622196.4_1	SLC38A5	lncRNA, nonsense_mediated_decay, protein_coding, retained_intron	SLC38A5	0	0.12	0.29	0.22	0	0.1	0	0	0	0.984913	3.30158	1.29562	0.195105	NA	0.984913	2.85339	1.12863	0.259054	NA
ENSG00000017797.13_4	6	6	[ENST00000019317.8_1, ENST00000383432.8_2, ENST00000458039.3_1, ENST00000577221.1_1, ENST00000585015.6_2, ENST00000609094.2_2]	chr18:9475006-9538112	+	-	14	63106	8041	1194	6847	0.851511	ENST00000019317.8_1, ENST00000383432.8_2, ENST00000458039.3_1, ENST00000577221.1_1, ENST00000585015.6_2, ENST00000609094.2_2	RALBP1	protein_coding	RALBP1	5.16	6.41	6.07	6.37	7.87	7.47	6.9	8.82	6.22	358.223	-0.0785019	-0.575343	0.56506	0.726632	358.223	0.0235867	0.174785	0.861248	0.999983
ENSG00000018189.13_4	15	15	[ENST00000226328.8_1, ENST00000381006.8_2, ENST00000417478.6_1, ENST00000502653.5_1, ENST00000503025.5_1, ENST00000503876.5_1, ENST00000504805.6_2, ENST00000507333.5_1, ENST00000512103.5_1, ENST00000512331.5_1, ENST00000513593.1_1, ENST00000513597.5_2, ENST00000514898.1_1, ENST00000515442.1_1, ENST00000515479.5_1]	chr4:71569920-71674336	+	-	24	104416	9405	978	8427	0.896013	ENST00000226328.8_1, ENST00000381006.8_2, ENST00000417478.6_1, ENST00000502653.5_1, ENST00000503025.5_1, ENST00000503876.5_1, ENST00000504805.6_2, ENST00000507333.5_1, ENST00000512103.5_1, ENST00000512331.5_1, ENST00000513593.1_1, ENST00000513597.5_2, ENST00000514898.1_1, ENST00000515442.1_1, ENST00000515479.5_1	RUFY3	lncRNA, nonsense_mediated_decay, protein_coding, retained_intron	RUFY3	4.19	2.7	3.67	4.62	4.14	3.46	5.61	6.61	3.61	69.3232	-0.330236	-1.11321	0.265617	0.453812	69.3232	-0.320178	-1.10276	0.270133	0.999983
ENSG00000018236.15_6	11	11	[ENST00000347616.5_1, ENST00000348761.2_1, ENST00000547702.5_1, ENST00000547849.5_1, ENST00000548005.5_3, ENST00000548481.1_1, ENST00000550305.1_1, ENST00000551295.7_2, ENST00000551424.5_1, ENST00000552248.5_3, ENST00000552913.5_3]	chr12:41086240-41466217	+	-	31	379977	7492	372	7120	0.950347	ENST00000347616.5_1, ENST00000348761.2_1, ENST00000547702.5_1, ENST00000547849.5_1, ENST00000548005.5_3, ENST00000548481.1_1, ENST00000550305.1_1, ENST00000551295.7_2, ENST00000551424.5_1, ENST00000552248.5_3, ENST00000552913.5_3	CNTN1	lncRNA, nonsense_mediated_decay, protein_coding	CNTN1	0	0	0	0	0	0	0	0	0
ENSG00000018280.17_3	18	15	[ENST00000233202.11_2, ENST00000354352.9_1, ENST00000460592.1_1, ENST00000465984.5_1, ENST00000468221.5_1, ENST00000468721.1_1, ENST00000469449.1_1, ENST00000469799.5_1, ENST00000471875.5_1, ENST00000473367.5_1, ENST00000475225.5_1, ENST00000481524.5_1, ENST00000483487.2_1, ENST00000490536.1_1, ENST00000490872.1_1, ENST00000492413.5_1, ENST00000494322.5_1, ENST00000539932.5_1]	chr2:219246751-219261617	+	-	10	14866	8676	2940	5736	0.661134	ENST00000233202.11_2, ENST00000354352.9_1, ENST00000460592.1_1, ENST00000465984.5_1, ENST00000468221.5_1, ENST00000468721.1_1, ENST00000469449.1_1, ENST00000469799.5_1, ENST00000471875.5_1, ENST00000473367.5_1, ENST00000475225.5_1, ENST00000481524.5_1, ENST00000483487.2_1, ENST00000490536.1_1, ENST00000490872.1_1, ENST00000492413.5_1, ENST00000494322.5_1, ENST00000539932.5_1	SLC11A1	nonsense_mediated_decay, protein_coding, retained_intron	SLC11A1	0.17	0.17	0.06	0	0.04	0.08	0.05	0.13	0	3.59674	1.1901	1.04204	0.297394	NA	3.59674	-0.493489	-0.398682	0.690127	NA
ENSG00000018408.14_3	12	12	[ENST00000360632.7_1, ENST00000460517.1_2, ENST00000465804.5_1, ENST00000467467.5_1, ENST00000471586.5_2, ENST00000472417.1_2, ENST00000474080.1_1, ENST00000475579.1_1, ENST00000479238.1_1, ENST00000485244.1_1, ENST00000485352.1_2, ENST00000494754.1_2]	chr3:149235021-149454501	-	-	19	219480	8413	872	7541	0.896351	ENST00000360632.7_1, ENST00000460517.1_2, ENST00000465804.5_1, ENST00000467467.5_1, ENST00000471586.5_2, ENST00000472417.1_2, ENST00000474080.1_1, ENST00000475579.1_1, ENST00000479238.1_1, ENST00000485244.1_1, ENST00000485352.1_2, ENST00000494754.1_2	WWTR1	lncRNA, nonsense_mediated_decay, protein_coding, retained_intron	WWTR1	18.07	24.07	18.22	19.62	15.3	15.97	14.7	11.84	18.3	297.733	0.637289	2.74469	0.00605686	0.0327733	297.733	0.203003	0.872522	0.382924	0.999983
ENSG00000018510.15_5	5	5	[ENST00000264167.9_2, ENST00000409888.1_1, ENST00000460342.1_1, ENST00000637633.1_1, ENST00000642466.1_1]	chr2:178257495-178424027	+	-	22	166532	8839	639	8200	0.927707	ENST00000264167.9_2, ENST00000409888.1_1, ENST00000460342.1_1, ENST00000637633.1_1, ENST00000642466.1_1	AGPS	protein_coding, retained_intron	AGPS	0	0	0	0	0.07	0.07	0	0	0	0.465493	0	0	1	NA	0.465493	2.97465	0.774489	0.438642	NA
ENSG00000018607.6_4	1	1	[ENST00000438300.1_1]	chr2:133066881-133076309	+	-	3	9428	1774	0	1774	1	ENST00000438300.1_1	ZNF806	unprocessed_pseudogene		0	0	0	0	0	0	0	0	0
ENSG00000018610.14_3	4	4	[ENST00000320339.8_1, ENST00000469448.1_1, ENST00000536133.2_2, ENST00000644802.1_1]	chrX:118672111-118699371	-	-	7	27260	2580	620	1960	0.75969	ENST00000320339.8_1, ENST00000469448.1_1, ENST00000536133.2_2, ENST00000644802.1_1	CXorf56	lncRNA, protein_coding	CXorf56	15.97	16.95	16.78	17.85	26.63	22.63	23.26	26.85	15.19	269.238	-0.148033	-0.818433	0.41311	0.600664	269.238	0.0790979	0.442409	0.658193	0.999983
ENSG00000018625.14_2	8	8	[ENST00000361216.7_1, ENST00000392233.7_1, ENST00000447527.1_1, ENST00000459972.1_1, ENST00000463989.1_1, ENST00000468587.1_1, ENST00000472488.5_1, ENST00000478587.1_1]	chr1:160085548-160113381	+	-	23	27833	6298	627	5671	0.900445	ENST00000361216.7_1, ENST00000392233.7_1, ENST00000447527.1_1, ENST00000459972.1_1, ENST00000463989.1_1, ENST00000468587.1_1, ENST00000472488.5_1, ENST00000478587.1_1	ATP1A2	lncRNA, protein_coding, retained_intron	ATP1A2	0	0	0	0	0.02	0	0	0.02	0.06	0.382123	-2.07939	-0.569717	0.568869	NA	0.382123	-1.4639	-0.401088	0.688355	NA
ENSG00000018699.13_4	7	7	[ENST00000317907.9_2, ENST00000428527.1_1, ENST00000433416.5_2, ENST00000438654.1_1, ENST00000448773.5_1, ENST00000454690.1_1, ENST00000647819.1_1]	chr2:32853098-33046118	+	-	25	193020	3443	520	2923	0.848969	ENST00000317907.9_2, ENST00000428527.1_1, ENST00000433416.5_3, ENST00000438654.1_1, ENST00000448773.5_1, ENST00000454690.1_1, ENST00000647819.1_1	TTC27	nonsense_mediated_decay, protein_coding	TTC27	6.23	9.1	7.77	8.5	12.32	9.83	8.2	9.42	9.95	217.792	-0.0317373	-0.163858	0.869843	0.928864	217.792	0.172894	0.908419	0.363657	0.999983
ENSG00000018869.16_4	7	6	[ENST00000301310.8_1, ENST00000586929.5_1, ENST00000587778.5_1, ENST00000589143.5_1, ENST00000589895.1_2, ENST00000593145.5_1, ENST00000619584.4_1]	chr19:56887214-56904914	-	-	6	17700	3350	226	3124	0.932537	ENST00000301310.8_1, ENST00000586929.5_1, ENST00000587778.5_1, ENST00000589143.5_1, ENST00000589895.1_3, ENST00000593145.5_1, ENST00000619584.4_1	ZNF582	non_stop_decay, protein_coding	ZNF582	0	0	0	0	0	0	0	0	0
ENSG00000019102.12_3	2	2	[ENST00000326621.10_2, ENST00000403470.1_2]	chr11:124617369-124622151	-	-	7	4782	1447	0	1447	1	ENST00000326621.10_2, ENST00000403470.1_2	VSIG2	protein_coding	VSIG2, ESAM	0.07	0.16	0	0	0	0.14	0.08	0.07	0	0.770516	0.78616	0.322295	0.747229	NA	0.770516	-0.0709384	-0.0281676	0.977528	NA
ENSG00000019144.19_6	28	27	[ENST00000356063.9_1, ENST00000361417.6_1, ENST00000392852.7_1, ENST00000524713.5_1, ENST00000525226.5_1, ENST00000525427.1_1, ENST00000526374.5_1, ENST00000526537.2_1, ENST00000526699.5_1, ENST00000526826.1_1, ENST00000527259.5_1, ENST00000527500.5_1, ENST00000527898.5_1, ENST00000528594.5_1, ENST00000528875.5_1, ENST00000529005.5_1, ENST00000530708.4_1, ENST00000530994.5_1, ENST00000531987.2_1,…	chr11:118477154-118528741	+	-	32	51587	21714	3946	17768	0.818274	ENST00000356063.9_1, ENST00000361417.6_1, ENST00000392852.7_1, ENST00000524713.5_1, ENST00000525226.5_1, ENST00000525427.1_1, ENST00000526374.5_1, ENST00000526537.2_1, ENST00000526699.5_1, ENST00000526826.1_1, ENST00000527259.5_1, ENST00000527500.5_1, ENST00000527898.5_1, ENST00000528594.5_1, ENST00000528875.5_1, ENST00000529005.5_1, ENST00000530708.4_1, ENST00000530994.5_1, ENST00000531987.2_1, …	PHLDB1	lncRNA, nonsense_mediated_decay, protein_coding, retained_intron	PHLDB1	0.97	1	1.81	1.19	0.74	1.26	0.8	0.68	1.1	36.5918	0.758162	1.82235	0.0684025	0.184839	36.5918	0.339482	0.810936	0.417403	0.999983
ENSG00000019169.10_3	3	3	[ENST00000327097.4_1, ENST00000412481.1_2, ENST00000494979.1_1]	chr2:119699741-119752236	+	-	18	52495	2079	0	2079	1	ENST00000327097.4_1, ENST00000412481.1_2, ENST00000494979.1_1	MARCO	protein_coding, retained_intron	MARCO	0	0	0	0	0	0	0	0	0
ENSG00000019186.10_3	6	6	[ENST00000216862.8_2, ENST00000395954.3_1, ENST00000395955.7_1, ENST00000460643.1_1, ENST00000472970.1_1, ENST00000487593.1_1]	chr20:52769984-52790525	-	-	12	20541	3988	0	3988	1	ENST00000216862.8_2, ENST00000395954.3_1, ENST00000395955.7_1, ENST00000460643.1_1, ENST00000472970.1_1, ENST00000487593.1_1	CYP24A1	lncRNA, protein_coding	CYP24A1	0	0	0	0	0	0	0	0	0.03
ENSG00000019485.13_5	6	5	[ENST00000424263.6_2, ENST00000526442.5_2, ENST00000528980.1_1, ENST00000530656.5_3, ENST00000534751.2_1, ENST00000622142.5_3]	chr11:45117356-45256661	+	-	12	139305	13940	284	13656	0.979627	ENST00000424263.6_2, ENST00000526442.5_2, ENST00000528980.1_1, ENST00000530656.5_3, ENST00000534751.2_1, ENST00000622142.5_3	PRDM11	lncRNA, protein_coding	PRDM11	1.14	1.06	1.4	0.85	1.02	1.2	0.46	0.8	0.68	41.9818	1.1336	3.35488	0.000793995	0.00726832	41.9818	0.701646	2.04256	0.0410964	0.641376
ENSG00000019505.8_4	3	3	[ENST00000020926.8_2, ENST00000528101.1_3, ENST00000533332.1_3]	chr11:45261852-45307892	-	-	9	46040	5445	747	4698	0.86281	ENST00000020926.8_2, ENST00000528101.1_3, ENST00000533332.1_3	SYT13	nonsense_mediated_decay, protein_coding	SYT13	0.02	0.02	0.17	0.03	0.17	0.05	0.05	0	0.04	2.27122	1.17169	0.710965	0.477106	NA	2.27122	1.42386	0.876041	0.381008	NA
ENSG00000019549.12_5	4	4	[ENST00000020945.4_4, ENST00000396822.6_2, ENST00000642303.1_1, ENST00000649776.1_1]	chr8:49830156-49834299	-	-	2	4143	3398	0	3398	1	ENST00000020945.4_4, ENST00000396822.6_2, ENST00000649776.1_1	SNAI2	protein_coding, retained_intron	SNAI2	1.3	1.54	0.87	2.88	2.36	2.14	0.71	1.19	1.25	18.8826	0.485679	0.9411	0.346654	0.537683	18.8826	1.29762	2.59278	0.00952026	0.334434
ENSG00000019582.15_5	12	7	[ENST00000009530.12_3, ENST00000353334.10_1, ENST00000377795.7_1, ENST00000517752.5_1, ENST00000517791.1_1, ENST00000518797.5_3, ENST00000522153.1_1, ENST00000522246.5_1, ENST00000523208.5_2, ENST00000523813.1_1, ENST00000523836.5_1, ENST00000524315.5_1]	chr5:149779603-149792492	-	-	8	12889	4780	801	3979	0.832427	ENST00000009530.12_3, ENST00000353334.10_1, ENST00000377795.7_1, ENST00000517752.5_1, ENST00000517791.1_1, ENST00000518797.5_3, ENST00000522153.1_1, ENST00000522246.5_1, ENST00000523208.5_2, ENST00000523813.1_1, ENST00000523836.5_1, ENST00000524315.5_1	CD74	nonsense_mediated_decay, protein_coding, retained_intron	CD74	0	0.08	0	0.16	0.07	0	0	0	0	0.436604	0.978425	0.272598	0.785162	NA	0.436604	2.30185	0.659978	0.509268	NA
ENSG00000019991.17_5	12	8	[ENST00000222390.11_4, ENST00000354224.10_2, ENST00000412881.5_3, ENST00000421558.1_3, ENST00000423064.7_2, ENST00000444829.7_2, ENST00000453018.1_2, ENST00000453411.6_2, ENST00000457544.7_3, ENST00000465234.2_2, ENST00000643024.1_1, ENST00000644543.1_1]	chr7:81328323-81399754	-	-	20	71431	9755	707	9048	0.927524	ENST00000222390.11_5, ENST00000354224.10_2, ENST00000412881.5_3, ENST00000421558.1_3, ENST00000423064.7_2, ENST00000444829.7_2, ENST00000453018.1_2, ENST00000453411.6_2, ENST00000457544.7_3, ENST00000465234.2_2, ENST00000643024.1_1	HGF	protein_coding, retained_intron	HGF	0.01	0	0	0	0	0	0	0	0
ENSG00000019995.6_3	2	2	[ENST00000359653.4_1, ENST00000471421.1_1]	chr10:126630691-126676758	+	-	9	46067	5993	0	5993	1	ENST00000359653.4_1, ENST00000471421.1_1, ENST00000508096.1_1	AL731577.2, ZRANB1	lncRNA, protein_coding	ZRANB1	0.57	0.83	0.9	1.28	1.76	1.22	1.52	2.01	0.93	86.6375	-0.707097	-2.51641	0.0118557	0.0532769	86.6375	-0.0161233	-0.0594942	0.952559	0.999983
ENSG00000020129.16_4	6	6	[ENST00000356090.8_2, ENST00000373243.7_3, ENST00000373253.7_2, ENST00000423723.1_1, ENST00000437806.1_1, ENST00000459931.1_1]	chr1:36023073-36032875	+	-	9	9802	4917	316	4601	0.935733	ENST00000356090.8_2, ENST00000373243.7_3, ENST00000373253.7_2, ENST00000423723.1_1, ENST00000437806.1_1, ENST00000459931.1_1	NCDN	lncRNA, protein_coding	NCDN	17.28	14.36	16.23	14.15	13.01	14.32	15.67	18.22	17.78	545.922	0.125325	0.80468	0.421005	0.608205	545.922	-0.285307	-1.82548	0.0679288	0.73997
ENSG00000020181.17_2	3	3	[ENST00000315215.11_1, ENST00000412232.2_1, ENST00000428068.5_1]	chr8:37641708-37702414	+	-	20	60706	7061	0	7061	1	ENST00000315215.11_1, ENST00000412232.2_1, ENST00000428068.5_1	ADGRA2	protein_coding	GPR124	0.25	0.12	0.18	0.06	0.06	0.13	0.19	0.08	0.07	9.26422	0.969782	1.35334	0.175947	NA	9.26422	-0.383252	-0.505634	0.613114	0.999983
ENSG00000020219.9_4	1	1	[ENST00000465400.1_1]	chr7:152142561-152144235	+	-	1	1674	1674	0	1674	1	ENST00000465400.1_1	CCT8L1P	processed_pseudogene		0	0	0	0	0	0	0	0	0
ENSG00000020256.20_4	12	11	[ENST00000216923.5_2, ENST00000346617.8_1, ENST00000361387.6_1, ENST00000371515.8_1, ENST00000371518.6_1, ENST00000371523.8_2, ENST00000395979.1_1, ENST00000395989.7_3, ENST00000456175.5_3, ENST00000461898.1_1, ENST00000467811.5_1, ENST00000477786.5_1]	chr20:50668201-50820847	-	-	17	152646	6790	1237	5553	0.81782	ENST00000216923.5_2, ENST00000346617.8_1, ENST00000361387.6_1, ENST00000371515.8_1, ENST00000371518.6_1, ENST00000371523.8_2, ENST00000395979.1_1, ENST00000395989.7_3, ENST00000456175.5_3, ENST00000461898.1_1, ENST00000467811.5_1, ENST00000477786.5_1	ZFP64	lncRNA, protein_coding	ZFP64	14.18	15.61	15.05	17.49	16.12	18.61	15.1	15.01	14.19	530.541	0.247093	1.86171	0.0626442	0.174142	530.541	0.26993	2.04705	0.0406527	0.641376
ENSG00000020426.11_4	9	9	[ENST00000261245.9_2, ENST00000539616.6_1, ENST00000553354.5_1, ENST00000554002.5_3, ENST00000554641.1_1, ENST00000555545.1_1, ENST00000556525.1_1, ENST00000556764.5_1, ENST00000557134.1_3]	chr14:61201459-61436683	+	-	9	235224	3877	508	3369	0.868971	ENST00000261245.9_2, ENST00000539616.6_1, ENST00000553354.5_1, ENST00000553946.1_1, ENST00000554002.5_3, ENST00000554641.1_1, ENST00000555545.1_1, ENST00000556525.1_1, ENST00000556764.5_1, ENST00000557134.1_3	AL160236.2, MNAT1	lncRNA, protein_coding, retained_intron	MNAT1	3.51	3.81	3.65	5.07	6.62	6.32	7.53	10.63	3.16	58.005	-0.691754	-1.97459	0.0483149	0.145611	58.005	-0.181223	-0.532388	0.594457	0.999983
ENSG00000020577.13_3	13	11	[ENST00000251091.9_2, ENST00000392067.7_2, ENST00000553988.5_1, ENST00000554335.5_2, ENST00000554587.1_1, ENST00000555091.1_1, ENST00000555112.1_1, ENST00000555192.1_1, ENST00000555719.1_1, ENST00000556069.5_1, ENST00000557013.1_1, ENST00000557692.2_1, ENST00000631086.2_1]	chr14:55033814-55260033	+	-	22	226219	12170	1606	10564	0.868036	ENST00000251091.9_2, ENST00000392067.7_2, ENST00000553988.5_1, ENST00000554335.5_2, ENST00000554587.1_1, ENST00000555091.1_1, ENST00000555112.1_1, ENST00000555192.1_1, ENST00000555719.1_1, ENST00000556069.5_1, ENST00000557013.1_1, ENST00000557692.2_1, ENST00000631086.2_1	SAMD4A	lncRNA, protein_coding, retained_intron	SAMD4A	5.78	8.31	7.28	4.89	7.63	7.39	8.34	8	9.27	341.148	-0.0466898	-0.242389	0.808479	0.893245	341.148	-0.350846	-1.8244	0.0680913	0.73997
ENSG00000020633.18_2	5	5	[ENST00000308873.10_1, ENST00000338888.3_1, ENST00000399916.5_1, ENST00000479341.1_1, ENST00000496967.1_1]	chr1:25226001-25291612	-	-	8	65611	4523	0	4523	1	ENST00000308873.10_1, ENST00000338888.3_1, ENST00000399916.5_1, ENST00000479341.1_1, ENST00000496967.1_1	RUNX3	lncRNA, protein_coding	RUNX3	0.16	0.1	0.02	0.03	0	0.02	0.02	0.06	0.04	1.90615	1.44626	0.981934	0.326132	NA	1.90615	-1.10458	-0.635031	0.525408	NA
ENSG00000020922.12_5	10	10	[ENST00000323929.7_2, ENST00000323977.7_1, ENST00000393241.8_2, ENST00000407439.7_1, ENST00000535120.1_1, ENST00000536144.1_1, ENST00000536754.5_1, ENST00000538923.1_1, ENST00000540013.5_1, ENST00000541157.5_1]	chr11:94148743-94227074	-	-	22	78331	7689	1270	6419	0.834829	ENST00000323929.7_2, ENST00000323977.7_1, ENST00000393241.8_2, ENST00000407439.7_1, ENST00000535120.1_1, ENST00000536144.1_1, ENST00000536754.5_2, ENST00000538923.1_1, ENST00000540013.5_1, ENST00000541157.5_1	MRE11	lncRNA, protein_coding, retained_intron	MRE11A	1.92	3.98	1.94	2.34	5.96	5.69	4.94	4.46	2.63	116.078	-0.400668	-1.12944	0.258711	0.445977	116.078	0.237424	0.682203	0.495111	0.999983
ENSG00000021300.14_6	22	18	[ENST00000227214.10_1, ENST00000354190.10_2, ENST00000398492.8_2, ENST00000398494.8_1, ENST00000426191.2_1, ENST00000535129.5_1, ENST00000535582.5_3, ENST00000536527.5_3, ENST00000538227.5_1, ENST00000539157.5_1, ENST00000540157.1_1, ENST00000540431.1_1, ENST00000541597.5_1, ENST00000541760.1_1, ENST00000542389.5_1, ENST00000543085.5_1, ENST00000543524.5_1, ENST00000544282.1_1, ENST00000544532.5_…	chr11:73357222-73373864	+	-	14	16642	4933	607	4326	0.876951	ENST00000227214.10_1, ENST00000354190.10_2, ENST00000398492.8_2, ENST00000398494.8_1, ENST00000426191.2_1, ENST00000535129.5_1, ENST00000535582.5_3, ENST00000536527.5_3, ENST00000538227.5_1, ENST00000539157.5_1, ENST00000540157.1_1, ENST00000540431.1_1, ENST00000541597.5_1, ENST00000541760.1_1, ENST00000542389.5_1, ENST00000543085.5_1, ENST00000543524.5_1, ENST00000544282.1_1, ENST00000544532.5_1…	PLEKHB1	lncRNA, protein_coding, retained_intron	PLEKHB1	10.26	10.94	13.02	13.79	13.08	13.08	14.35	14.08	15.61	233.872	-0.136567	-0.775805	0.437864	0.62258	233.872	-0.111997	-0.630017	0.528684	0.999983
ENSG00000021355.13_3	5	5	[ENST00000380739.6_2, ENST00000460260.1_1, ENST00000468511.5_1, ENST00000476896.5_1, ENST00000490094.5_1]	chr6:2832565-2842193	-	-	8	9628	3047	445	2602	0.853955	ENST00000380739.6_2, ENST00000460260.1_1, ENST00000468511.5_1, ENST00000476896.5_1, ENST00000490094.5_1	SERPINB1	lncRNA, protein_coding	SERPINB1	6.43	8.19	9.21	7.85	8.52	8.77	8.48	8.41	4.69	164.867	0.38509	1.82233	0.0684056	0.184839	164.867	0.267459	1.27473	0.202405	0.963557
ENSG00000021461.16_2	17	5	[ENST00000222382.5_1, ENST00000312017.9_1, ENST00000342499.8_1, ENST00000354829.6_1, ENST00000415413.5_1, ENST00000417625.5_1, ENST00000433277.5_1, ENST00000434806.5_1, ENST00000436834.5_1, ENST00000444905.5_1, ENST00000463915.5_1, ENST00000472352.1_1, ENST00000477658.5_1, ENST00000481362.5_1, ENST00000491648.5_1, ENST00000495115.5_1, ENST00000631161.2_1]	chr7:99425635-99463725	+	-	15	38090	2637	510	2127	0.806598	ENST00000222382.5_1, ENST00000312017.9_1, ENST00000342499.8_1, ENST00000354829.6_1, ENST00000415413.5_1, ENST00000417625.5_1, ENST00000433277.5_1, ENST00000434806.5_1, ENST00000436834.5_1, ENST00000444905.5_1, ENST00000463915.5_1, ENST00000472352.1_1, ENST00000477658.5_1, ENST00000481362.5_1, ENST00000491648.5_1, ENST00000495115.5_1, ENST00000631161.2_1	CYP3A43	lncRNA, nonsense_mediated_decay, protein_coding, retained_intron	CYP3A43	0	0	0.06	0.31	0.14	0	0.03	0	0	0.801034	0.253179	0.0905579	0.927844	NA	0.801034	2.64277	1.0095	0.312733	NA
ENSG00000021488.13_3	6	6	[ENST00000023064.9_2, ENST00000587772.1_1, ENST00000589659.1_1, ENST00000590341.5_1, ENST00000590465.5_1, ENST00000592232.5_1]	chr19:33321414-33360673	-	-	12	39259	2598	218	2380	0.916089	ENST00000023064.9_2, ENST00000587772.1_1, ENST00000589659.1_1, ENST00000590341.5_1, ENST00000590465.5_1, ENST00000592232.5_1	SLC7A9	nonsense_mediated_decay, protein_coding, retained_intron	SLC7A9	0.16	0.11	0.09	0.11	0	0.05	0.06	0.1	0.07	1.41293	0.934756	0.585355	0.558309	NA	1.41293	-0.434334	-0.259824	0.794999	NA
ENSG00000021574.12_4	21	19	[ENST00000315285.8_2, ENST00000345662.5_2, ENST00000615843.4_1, ENST00000621856.2_2, ENST00000642281.1_1, ENST00000642455.1_2, ENST00000642751.1_1, ENST00000642999.1_1, ENST00000643327.1_1, ENST00000643334.1_1, ENST00000644408.1_1, ENST00000644954.1_1, ENST00000645159.1_1, ENST00000645400.1_1, ENST00000645550.1_1, ENST00000645671.1_1, ENST00000645730.1_1, ENST00000646082.1_1, ENST00000646571.1_1,…	chr2:32288615-32382706	+	-	18	94091	9490	2670	6820	0.718651	ENST00000315285.8_2, ENST00000345662.5_2, ENST00000615843.4_1, ENST00000621856.2_2, ENST00000642281.1_1, ENST00000642455.1_2, ENST00000642751.1_1, ENST00000642999.1_1, ENST00000643327.1_2, ENST00000643334.1_1, ENST00000644408.1_1, ENST00000644954.1_1, ENST00000645159.1_1, ENST00000645400.1_1, ENST00000645550.1_1, ENST00000645671.1_1, ENST00000645730.1_1, ENST00000646082.1_1, ENST00000646571.1_1, …	SPAST	lncRNA, nonsense_mediated_decay, protein_coding, retained_intron	SPAST	2.73	3.04	3.38	4.93	5.44	5.5	5.71	5.59	5.21	183.85	-0.622195	-3.68932	0.000224851	0.00274758	183.85	-0.0267946	-0.163717	0.869954	0.999983
ENSG00000021645.18_4	18	17	[ENST00000281127.11_1, ENST00000335750.6_1, ENST00000428277.6_1, ENST00000553363.5_1, ENST00000553631.1_1, ENST00000553803.5_1, ENST00000554719.5_1, ENST00000554738.5_1, ENST00000555073.5_1, ENST00000555387.1_1, ENST00000556003.1_1, ENST00000556088.1_1, ENST00000556496.2_1, ENST00000557081.1_1, ENST00000557594.5_1, ENST00000634266.1_1, ENST00000634499.1_3, ENST00000635466.1_3]	chr14:78636715-80334633	+	-	37	1697918	15535	1785	13750	0.885098	ENST00000281127.11_1, ENST00000335750.6_1, ENST00000428277.6_1, ENST00000553363.5_1, ENST00000553631.1_1, ENST00000553803.5_1, ENST00000554719.5_1, ENST00000554738.5_2, ENST00000555073.5_1, ENST00000555387.1_2, ENST00000556003.1_1, ENST00000556088.1_1, ENST00000556496.2_1, ENST00000557081.1_1, ENST00000557594.5_1, ENST00000634266.1_1, ENST00000634499.1_3, ENST00000635466.1_3	NRXN3	lncRNA, protein_coding, retained_intron	NRXN3	0.12	0.26	0.15	0.22	0.18	0.23	0.38	0.32	0.31	9.83491	-0.821564	-1.28793	0.197769	NA	9.83491	-0.672534	-1.09499	0.27352	0.999983
ENSG00000021762.20_4	19	17	[ENST00000263650.12_2, ENST00000348039.9_1, ENST00000389989.7_1, ENST00000459995.5_1, ENST00000465323.1_1, ENST00000471998.6_1, ENST00000477622.1_1, ENST00000478260.5_1, ENST00000498536.5_1, ENST00000525498.5_1, ENST00000526122.5_3, ENST00000528124.1_1, ENST00000530372.5_3, ENST00000532951.1_1, ENST00000533234.5_3, ENST00000533721.5_3, ENST00000534157.1_3, ENST00000534454.5_3, ENST00000534491.5_1]	chr11:3108336-3187969	-	-	26	79633	7473	375	7098	0.949819	ENST00000263650.12_2, ENST00000348039.9_1, ENST00000389989.7_1, ENST00000459995.5_1, ENST00000465323.1_1, ENST00000471998.6_1, ENST00000477622.1_1, ENST00000478260.5_1, ENST00000498536.5_1, ENST00000525498.5_1, ENST00000526122.5_3, ENST00000528124.1_1, ENST00000530372.5_3, ENST00000532951.1_1, ENST00000533234.5_3, ENST00000533721.5_3, ENST00000534157.1_3, ENST00000534454.5_3, ENST00000534491.5_1	OSBPL5	lncRNA, nonsense_mediated_decay, protein_coding, retained_intron	OSBPL5	3.02	3.7	3.47	3.45	5.21	3.97	4.76	5.2	3.78	73.762	-0.199569	-0.811381	0.417147	0.604115	73.762	-0.104986	-0.429508	0.667553	0.999983
ENSG00000021776.11_4	6	6	[ENST00000156471.10_2, ENST00000543879.6_1, ENST00000558202.1_1, ENST00000559090.5_1, ENST00000559767.1_1, ENST00000560117.1_3]	chr15:35143982-35261943	-	-	34	117961	13431	3063	10368	0.771945	ENST00000156471.10_2, ENST00000543879.6_1, ENST00000558202.1_1, ENST00000559090.5_1, ENST00000559767.1_1, ENST00000560117.1_3	AQR	nonsense_mediated_decay, protein_coding, retained_intron	AQR	15.89	17.2	17.24	20.65	19.36	20.18	15.91	21.51	20.31	931.413	0.0335343	0.236711	0.812881	0.89542	931.413	0.0946887	0.670365	0.502625	0.999983
ENSG00000021826.15_4	13	12	[ENST00000233072.9_1, ENST00000417946.5_1, ENST00000430249.6_1, ENST00000451903.2_1, ENST00000467353.1_1, ENST00000470791.1_1, ENST00000479988.1_1, ENST00000497121.1_1, ENST00000497163.1_1, ENST00000518043.5_3, ENST00000523702.5_1, ENST00000619804.1_1, ENST00000645825.1_1]	chr2:211342405-211543831	+	-	44	201426	10775	1615	9160	0.850116	ENST00000233072.9_1, ENST00000417946.5_1, ENST00000430249.6_1, ENST00000451903.2_1, ENST00000467353.1_1, ENST00000470791.1_1, ENST00000479988.1_1, ENST00000497121.1_1, ENST00000497163.1_1, ENST00000518043.5_3, ENST00000523702.5_1, ENST00000619804.1_1, ENST00000645825.1_1	CPS1	lncRNA, protein_coding, retained_intron	CPS1	0.04	0.12	0.1	0	0.4	0	0.04	0.04	0	1.93467	1.96262	1.01949	0.307968	NA	1.93467	1.97684	1.00629	0.314278	NA
ENSG00000021852.13_4	6	4	[ENST00000371237.9_3, ENST00000465658.1_1, ENST00000468990.1_1, ENST00000494324.1_1, ENST00000535057.5_1, ENST00000543257.5_2]	chr1:57394879-57431813	-	-	14	36934	2732	69	2663	0.974744	ENST00000371237.9_3, ENST00000465658.1_1, ENST00000468990.1_1, ENST00000494324.1_1, ENST00000535057.5_1, ENST00000543257.5_2	C8B	lncRNA, protein_coding, retained_intron	C8B	0	0	0	0	0	0	0	0	0
ENSG00000022267.17_5	38	31	[ENST00000345434.7_1, ENST00000370674.3_1, ENST00000370676.7_2, ENST00000370683.5_2, ENST00000370690.8_3, ENST00000394153.6_2, ENST00000394155.6_1, ENST00000420362.5_1, ENST00000434885.5_1, ENST00000449474.5_1, ENST00000452016.5_1, ENST00000456445.5_1, ENST00000458357.5_1, ENST00000477080.1_1, ENST00000477204.5_1, ENST00000535737.5_2, ENST00000539015.5_1, ENST00000543669.5_2, ENST00000618438.4_1,…	chrX:135228860-135293518	+	-	22	64658	6089	344	5745	0.943505	ENST00000370674.3_2, ENST00000370676.7_2, ENST00000370683.5_2, ENST00000394153.6_2, ENST00000394155.7_2, ENST00000420362.5_1, ENST00000434885.5_2, ENST00000449474.5_2, ENST00000452016.5_2, ENST00000456445.5_2, ENST00000458357.5_1, ENST00000477080.1_1, ENST00000477204.5_1, ENST00000535737.5_2, ENST00000539015.5_1, ENST00000543669.5_2, ENST00000618438.4_1, ENST00000625935.2_2, ENST00000626004.1_1, …	FHL1	lncRNA, protein_coding, retained_intron	FHL1	29.56	33.53	30.74	35.66	34.5	37.23	49.88	46.75	42.28	1003.09	-0.336409	-2.89181	0.00383024	0.0236749	1003.09	-0.338495	-2.91976	0.00350301	0.184793
ENSG00000022277.12_4	9	9	[ENST00000023939.8_1, ENST00000357348.9_1, ENST00000395881.7_1, ENST00000449062.1_1, ENST00000466260.1_1, ENST00000477485.1_1, ENST00000477573.1_1, ENST00000484084.5_1, ENST00000487211.5_1]	chr20:55043640-55094505	+	-	11	50865	4063	342	3721	0.915826	ENST00000023939.8_1, ENST00000357348.9_1, ENST00000395881.7_1, ENST00000449062.1_1, ENST00000466260.1_1, ENST00000477485.1_1, ENST00000477573.1_1, ENST00000481560.1_1, ENST00000484084.5_1, ENST00000487211.5_1	FAM209A, RTF2	lncRNA, protein_coding, retained_intron	RTFDC1, FAM209A	23.86	27.73	30.8	33.82	47.82	43.64	38.02	51.58	31.05	672.995	-0.306066	-2.00994	0.044438	0.137433	672.995	0.0958183	0.635113	0.525355	0.999983
ENSG00000022355.17_6	20	19	[ENST00000023897.10_1, ENST00000393943.10_2, ENST00000428797.7_1, ENST00000437025.6_1, ENST00000519542.1_1, ENST00000519621.2_3, ENST00000521339.5_4, ENST00000522651.6_1, ENST00000634335.1_3, ENST00000635096.1_1, ENST00000635880.1_4, ENST00000635916.1_1, ENST00000636340.1_1, ENST00000636408.1_1, ENST00000636573.1_1, ENST00000637044.1_1, ENST00000637620.1_1, ENST00000637827.1_1, ENST00000638112.1_…	chr5:161274068-161326987	+	-	19	52919	6602	435	6167	0.934111	ENST00000023897.10_1, ENST00000393943.10_2, ENST00000428797.7_1, ENST00000437025.6_1, ENST00000519542.1_1, ENST00000519621.2_3, ENST00000521339.5_4, ENST00000522651.6_1, ENST00000634335.1_3, ENST00000635096.1_1, ENST00000635880.1_5, ENST00000635916.1_1, ENST00000636340.1_1, ENST00000636408.1_1, ENST00000636573.1_1, ENST00000637044.1_1, ENST00000637620.1_1, ENST00000637827.1_1, ENST00000638112.1_1…	GABRA1	lncRNA, nonsense_mediated_decay, protein_coding, retained_intron	GABRA1	0.04	0.05	0.04	0	0.04	0	0	0	0	0.502531	2.80143	0.951431	0.341385	NA	0.502531	0.925096	0.302323	0.762406	NA
ENSG00000022556.16_4	19	17	[ENST00000263437.10_2, ENST00000339757.11_1, ENST00000381637.3_1, ENST00000391721.8_1, ENST00000397169.3_1, ENST00000427260.6_1, ENST00000433772.6_1, ENST00000448584.7_2, ENST00000537859.5_1, ENST00000539848.5_1, ENST00000540005.1_1, ENST00000540597.5_1, ENST00000542755.1_1, ENST00000543010.5_1, ENST00000543277.1_1, ENST00000585500.5_1, ENST00000586512.1_1, ENST00000588107.5_3, ENST00000588619.5_…	chr19:55464497-55512510	+	-	20	48013	6313	1246	5067	0.802629	ENST00000263437.10_2, ENST00000339757.11_1, ENST00000381637.3_1, ENST00000391721.8_1, ENST00000397169.3_1, ENST00000427260.6_1, ENST00000433772.6_1, ENST00000448584.7_2, ENST00000466725.1_1, ENST00000537859.5_1, ENST00000539848.5_1, ENST00000540005.1_1, ENST00000540597.5_1, ENST00000542755.1_1, ENST00000543010.5_1, ENST00000543277.1_1, ENST00000585500.5_2, ENST00000586512.1_1, ENST00000588107.5_3…	AC011476.1, NLRP2	lncRNA, nonsense_mediated_decay, processed_pseudogene, protein_coding, retained_intron	NLRP2	0	0	0	0	0	0	0	0	0
ENSG00000022567.9_3	6	6	[ENST00000024061.7_1, ENST00000517878.5_1, ENST00000519067.5_1, ENST00000519986.1_1, ENST00000520137.1_3, ENST00000521804.1_1]	chr8:142217264-142318404	-	-	10	101140	8608	0	8608	1	ENST00000024061.7_1, ENST00000517878.5_1, ENST00000519067.5_1, ENST00000519986.1_1, ENST00000520137.1_3, ENST00000521804.1_1	SLC45A4	lncRNA, protein_coding	SLC45A4	2.93	3.41	2.93	4.36	3.24	3.08	2.51	3.32	3.3	86.5546	0.254442	0.967799	0.333145	0.524962	86.5546	0.260257	0.99932	0.31764	0.999983
ENSG00000022840.16_5	25	24	[ENST00000325954.9_4, ENST00000366112.6_1, ENST00000413266.6_3, ENST00000535395.1_1, ENST00000535417.1_1, ENST00000535470.5_1, ENST00000536869.5_1, ENST00000537376.1_1, ENST00000537740.1_4, ENST00000537997.1_3, ENST00000538254.1_2, ENST00000538796.5_1, ENST00000539486.1_4, ENST00000540046.5_2, ENST00000542207.5_4, ENST00000542438.1_2, ENST00000542701.1_1, ENST00000543578.1_1, ENST00000543675.5_1,…	chr12:120971282-121015391	+	-	23	44109	5900	533	5367	0.909661	ENST00000325954.9_4, ENST00000366112.6_1, ENST00000413266.6_3, ENST00000535395.1_1, ENST00000535417.1_1, ENST00000535470.5_1, ENST00000536869.5_1, ENST00000537376.1_1, ENST00000537740.1_5, ENST00000537997.1_3, ENST00000538254.1_3, ENST00000538796.5_1, ENST00000539486.1_5, ENST00000540046.5_3, ENST00000542207.5_5, ENST00000542438.1_3, ENST00000542701.1_1, ENST00000543578.1_1, ENST00000543675.5_1, …	RNF10	lncRNA, nonsense_mediated_decay, protein_coding, retained_intron	RNF10	138.15	146.97	135.08	160.3	185.18	175.03	174.86	204.89	127.23	2328.99	-0.022123	-0.189624	0.849604	0.917259	2328.99	0.0842494	0.722478	0.470001	0.999983
ENSG00000022976.15_4	12	12	[ENST00000420933.2_1, ENST00000442396.6_1, ENST00000557803.5_1, ENST00000558462.5_4, ENST00000558490.5_3, ENST00000558850.5_1, ENST00000559098.5_3, ENST00000559155.5_2, ENST00000559185.5_1, ENST00000560112.1_3, ENST00000560568.5_3, ENST00000561251.5_1]	chr14:102783713-102809039	+	-	12	25326	5590	813	4777	0.854562	ENST00000420933.2_1, ENST00000442396.6_1, ENST00000557803.5_1, ENST00000558462.5_5, ENST00000558490.5_3, ENST00000558850.5_1, ENST00000559098.5_3, ENST00000559155.5_3, ENST00000559185.5_1, ENST00000560112.1_3, ENST00000560568.5_3, ENST00000561251.5_1	ZNF839	lncRNA, nonsense_mediated_decay, protein_coding, retained_intron	ZNF839	2.09	3.04	3.5	3.25	3.37	3.4	2.24	4.55	3.07	93.3333	0.0461031	0.168691	0.866039	0.926246	93.3333	0.0712313	0.262453	0.792973	0.999983
ENSG00000023041.11_4	5	5	[ENST00000369404.3_1, ENST00000369405.7_2, ENST00000471035.1_1, ENST00000482410.5_1, ENST00000626395.2_2]	chr10:114184185-114206675	-	-	14	22490	3748	0	3748	1	ENST00000369404.3_1, ENST00000369405.7_2, ENST00000471035.1_1, ENST00000482410.5_1, ENST00000626395.2_2, ENST00000631085.2_2	AL157786.1, ZDHHC6	lncRNA, protein_coding	ZDHHC6	10.2	11.27	12.32	15.5	18.89	16.61	17.05	19.52	12.11	374.2	-0.283957	-1.91891	0.0549956	0.159198	374.2	0.108374	0.744813	0.456385	0.999983
ENSG00000023171.18_6	18	16	[ENST00000322282.11_2, ENST00000450171.2_1, ENST00000456860.6_2, ENST00000525757.1_1, ENST00000525945.1_1, ENST00000529432.5_2, ENST00000529750.5_3, ENST00000532581.5_1, ENST00000533341.3_3, ENST00000534764.1_2, ENST00000632815.1_2, ENST00000633087.1_1, ENST00000633646.1_2, ENST00000635736.1_2, ENST00000638086.1_1, ENST00000638157.1_2, ENST00000640939.1_1, ENST00000646146.1_3]	chr11:123229135-123498482	+	-	33	269347	14944	941	14003	0.937032	ENST00000322282.11_2, ENST00000450171.2_1, ENST00000456860.6_2, ENST00000525757.1_1, ENST00000525945.1_1, ENST00000529432.5_2, ENST00000529750.5_3, ENST00000532581.5_1, ENST00000533341.3_3, ENST00000534764.1_2, ENST00000632815.1_2, ENST00000633087.1_1, ENST00000633646.1_2, ENST00000635736.1_2, ENST00000638086.1_1, ENST00000638157.1_2, ENST00000640939.1_1, ENST00000646146.1_3	GRAMD1B	lncRNA, protein_coding, retained_intron	GRAMD1B, AP000783.1	0.1	0.21	0	0.23	0.06	0.03	0	0	0	1.47879	4.00836	1.76532	0.0775096	NA	1.47879	4.14232	1.89177	0.0585211	NA
ENSG00000023191.17_3	24	24	[ENST00000354420.7_2, ENST00000356187.9_1, ENST00000397604.7_1, ENST00000397614.5_1, ENST00000397615.6_1, ENST00000438658.6_1, ENST00000524464.5_1, ENST00000524780.5_1, ENST00000525522.5_1, ENST00000525701.5_1, ENST00000526295.1_1, ENST00000527485.5_1, ENST00000528713.5_1, ENST00000529115.5_1, ENST00000529306.5_1, ENST00000529368.5_1, ENST00000529768.5_1, ENST00000531149.1_1, ENST00000531223.1_1,…	chr11:494511-507300	-	-	11	12789	7374	1423	5951	0.807025	ENST00000354420.7_2, ENST00000356187.9_1, ENST00000397604.7_1, ENST00000397614.5_1, ENST00000397615.6_1, ENST00000438658.6_1, ENST00000524464.5_1, ENST00000524780.5_1, ENST00000525522.5_1, ENST00000525701.5_1, ENST00000526295.1_1, ENST00000527485.5_1, ENST00000528713.5_1, ENST00000529115.5_1, ENST00000529306.5_1, ENST00000529368.5_1, ENST00000529768.5_1, ENST00000531149.1_1, ENST00000531223.1_1, …	RNH1	lncRNA, nonsense_mediated_decay, protein_coding, retained_intron	RNH1	45.6	53.53	45.51	41.66	47.81	49.18	40.16	44.81	46.22	541.908	0.365567	2.61144	0.0090161	0.0438426	541.908	0.105185	0.750784	0.452783	0.999983
ENSG00000023228.14_4	10	6	[ENST00000233190.11_2, ENST00000423725.5_1, ENST00000432169.5_1, ENST00000440274.5_1, ENST00000449699.5_1, ENST00000454195.1_1, ENST00000455934.6_1, ENST00000456284.5_1, ENST00000457011.5_1, ENST00000498520.1_1]	chr2:206979540-207024233	-	-	20	44693	12174	5320	6854	0.563003	ENST00000233190.11_2, ENST00000423725.5_1, ENST00000431120.1_1, ENST00000432169.5_1, ENST00000440274.5_1, ENST00000449699.5_1, ENST00000454195.1_1, ENST00000455934.6_1, ENST00000456284.5_1, ENST00000457011.5_1, ENST00000498520.1_1	GCSHP3, NDUFS1	nonsense_mediated_decay, processed_pseudogene, protein_coding, retained_intron	NDUFS1	12.59	17.38	13.73	16.2	19.85	18.36	18.06	27.77	15.41	592.485	-0.241442	-1.46022	0.14423	0.301383	592.485	-0.120715	-0.73548	0.462047	0.999983
ENSG00000023287.13_5	10	10	[ENST00000025008.10_2, ENST00000435644.6_2, ENST00000517963.1_3, ENST00000518211.1_1, ENST00000518468.1_3, ENST00000518710.5_1, ENST00000519912.1_2, ENST00000521611.1_1, ENST00000522957.1_1, ENST00000523594.1_3]	chr8:53535017-53658403	-	-	26	123386	7613	237	7376	0.968869	ENST00000025008.10_2, ENST00000435644.6_2, ENST00000517963.1_3, ENST00000518211.1_1, ENST00000518468.1_3, ENST00000518710.5_1, ENST00000519912.1_2, ENST00000521611.1_1, ENST00000522957.1_1, ENST00000523594.1_3	RB1CC1	lncRNA, nonsense_mediated_decay, protein_coding, retained_intron	RB1CC1	2.15	2.15	1.61	1.41	2.78	2.23	3.38	2.72	2.91	152.839	-0.381282	-1.53572	0.124606	0.275687	152.839	-0.474326	-1.91096	0.0560097	0.706339
ENSG00000023318.8_4	1	1	[ENST00000262455.7_2]	chr9:102741466-102861282	-	-	12	119816	4808	1368	3440	0.715474	ENST00000262455.7_2	ERP44	protein_coding	ERP44	14.16	11.43	14.36	12.44	14.04	13.83	13.46	13.83	12.92	821.958	0.226724	1.63965	0.101078	0.240132	821.958	0.0321272	0.232341	0.816273	0.999983
ENSG00000023330.15_3	6	6	[ENST00000310271.6_1, ENST00000394965.6_1, ENST00000459884.1_1, ENST00000469224.5_1, ENST00000484952.6_2, ENST00000493402.1_1]	chr3:52232101-52248343	+	-	12	16242	2536	0	2536	1	ENST00000310271.6_1, ENST00000394965.6_1, ENST00000459884.1_1, ENST00000469224.5_1, ENST00000484952.6_2, ENST00000493402.1_1	ALAS1	protein_coding	ALAS1	22.55	22.98	17.95	19.91	17.27	20.62	14.49	17.61	16.09	401.976	0.632386	3.73355	0.000188798	0.00239313	401.976	0.298231	1.75239	0.0797069	0.775629
ENSG00000023445.14_3	7	6	[ENST00000263464.8_2, ENST00000526421.5_1, ENST00000527309.1_1, ENST00000527336.1_1, ENST00000528940.1_1, ENST00000532808.5_1, ENST00000615299.4_1]	chr11:102188180-102210134	+	-	12	21954	7518	1295	6223	0.827747	ENST00000263464.8_2, ENST00000526421.5_1, ENST00000527309.1_1, ENST00000527336.1_1, ENST00000528940.1_1, ENST00000532808.5_1, ENST00000615299.4_1	BIRC3	lncRNA, protein_coding, retained_intron	BIRC3	0.17	0.79	0.18	0.04	0.36	0.18	0.16	0.18	0.22	4.7692	1.07855	0.980188	0.326993	NA	4.7692	-0.00975545	-0.00882102	0.992962	0.999983
ENSG00000023516.9_3	1	1	[ENST00000025301.4_2]	chr13:42846287-42897397	+	-	13	51110	9915	0	9915	1	ENST00000025301.4_2	AKAP11	protein_coding	AKAP11	3.78	5.84	4.67	7.63	7.75	7.49	7.89	8.34	7.67	858.382	-0.520764	-3.72964	0.000191753	0.00242362	858.382	-0.0317718	-0.230013	0.818081	0.999983
ENSG00000023572.9_3	4	4	[ENST00000367439.7_1, ENST00000367440.3_1, ENST00000472197.1_1, ENST00000608166.2_2]	chr1:193059995-193075244	-	-	6	15249	6210	1808	4402	0.708857	ENST00000367439.7_1, ENST00000367440.3_1, ENST00000472197.1_1, ENST00000608166.2_2	GLRX2	lncRNA, nonsense_mediated_decay, protein_coding	GLRX2	1	1.07	1.42	1.63	4.71	4.46	3.78	6.16	2.37	60.4533	-1.57359	-3.89484	9.82654e-05	0.00145759	60.4533	-0.157363	-0.404281	0.686006	0.999983
ENSG00000023608.5_4	1	1	[ENST00000216294.5_2]	chr14:62229137-62263146	+	-	10	34009	2593	398	2195	0.84651	ENST00000216294.5_2, ENST00000555937.1_1	AL137129.1, SNAPC1	lncRNA, protein_coding	SNAPC1	0.55	0.42	0.45	0.33	0.71	0.56	0.69	0.79	0.58	17.8687	-0.274809	-0.575615	0.564875	0.726581	17.8687	-0.327174	-0.691484	0.489261	0.999983
ENSG00000023697.13_5	10	9	[ENST00000428559.7_2, ENST00000524480.5_4, ENST00000526521.5_1, ENST00000526530.1_1, ENST00000528821.5_1, ENST00000530274.5_1, ENST00000531803.5_3, ENST00000532573.1_1, ENST00000532964.5_1, ENST00000533447.5_3]	chr12:16064235-16190315	+	-	14	126080	2813	103	2710	0.963384	ENST00000428559.7_2, ENST00000524480.5_4, ENST00000526521.5_1, ENST00000526530.1_1, ENST00000528821.5_1, ENST00000530274.5_1, ENST00000531803.5_3, ENST00000532573.1_1, ENST00000532964.5_1, ENST00000533447.5_3	DERA	lncRNA, nonsense_mediated_decay, protein_coding, retained_intron	DERA	6.98	11.38	9.73	12.96	22.94	19.57	17.75	23.45	11.73	149.14	-0.676184	-2.67662	0.00743686	0.0380636	149.14	0.108188	0.439742	0.660124	0.999983
ENSG00000023734.11_4	6	6	[ENST00000025399.10_1, ENST00000419869.7_2, ENST00000536737.1_1, ENST00000538718.1_3, ENST00000539887.1_1, ENST00000541731.1_1]	chr12:16035320-16056412	+	-	11	21092	2215	0	2215	1	ENST00000025399.10_1, ENST00000419869.7_2, ENST00000536737.1_1, ENST00000538718.1_3, ENST00000539887.1_1, ENST00000541731.1_1	STRAP	nonsense_mediated_decay, protein_coding, retained_intron	STRAP	48.08	51.93	54.43	50.7	64.94	64.31	59.47	64.07	45.76	1164.34	0.106637	0.933194	0.35072	0.542144	1164.34	0.123687	1.0873	0.276906	0.999983
ENSG00000023839.11_4	11	8	[ENST00000370434.1_2, ENST00000370449.9_2, ENST00000496621.1_1, ENST00000647814.1_2, ENST00000647836.1_1, ENST00000648324.1_1, ENST00000648523.1_1, ENST00000648689.1_1, ENST00000649459.1_1, ENST00000649493.1_1, ENST00000649932.1_1]	chr10:101542396-101612351	+	-	34	69955	7837	1802	6035	0.770065	ENST00000370434.1_2, ENST00000496621.1_1, ENST00000647814.1_2, ENST00000647836.1_1, ENST00000648324.1_1, ENST00000648523.1_1, ENST00000648689.1_1, ENST00000649459.1_1, ENST00000649493.1_1, ENST00000649932.1_1	ABCC2	lncRNA, nonsense_mediated_decay, protein_coding, retained_intron	ABCC2	0.77	0.68	0.52	0.42	0.38	0.14	0.56	0.58	0.03	10.8083	1.17341	1.40097	0.161223	NA	10.8083	-0.189844	-0.219822	0.82601	0.999983
ENSG00000023892.11_3	3	3	[ENST00000316637.7_2, ENST00000444278.2_1, ENST00000468102.1_1]	chr6:35265594-35289548	+	-	11	23954	2579	0	2579	1	ENST00000316637.7_2, ENST00000444278.2_1, ENST00000468102.1_1	DEF6	lncRNA, protein_coding	DEF6	0.81	0.52	0.82	0.59	0.56	0.53	0.65	1.1	0.66	19.5461	0.0852341	0.187676	0.851131	0.917963	19.5461	-0.486704	-1.04706	0.29507	0.999983
ENSG00000023902.14_3	9	9	[ENST00000369124.5_2, ENST00000369126.5_1, ENST00000441340.1_1, ENST00000477309.1_1, ENST00000479194.5_1, ENST00000485470.1_1, ENST00000492304.1_1, ENST00000502767.1_1, ENST00000607609.2_1]	chr1:150121372-150136916	+	-	11	15544	6629	413	6216	0.937698	ENST00000369124.5_2, ENST00000369126.5_1, ENST00000441340.1_1, ENST00000477309.1_1, ENST00000479194.5_1, ENST00000485470.1_1, ENST00000492304.1_1, ENST00000502767.1_1, ENST00000607609.2_1	PLEKHO1	lncRNA, protein_coding, retained_intron	PLEKHO1	2.67	2.78	3.86	2.18	2.59	3.69	2.22	4.46	1.45	42.8699	0.471925	1.20507	0.228177	0.411663	42.8699	0.142316	0.361089	0.718033	0.999983
ENSG00000023909.10_3	4	4	[ENST00000370238.8_2, ENST00000462183.1_1, ENST00000467772.1_1, ENST00000615724.1_2]	chr1:94350754-94375012	-	-	8	24258	5426	589	4837	0.891449	ENST00000370238.8_2, ENST00000462183.1_1, ENST00000467772.1_1, ENST00000615724.1_2	GCLM	lncRNA, protein_coding	GCLM	0.93	1.43	1.89	2.1	2.27	2.47	1.87	2.39	1.25	67.8223	-0.154234	-0.51926	0.603579	0.755719	67.8223	0.359673	1.22995	0.218714	0.97518
ENSG00000024048.10_3	3	1	[ENST00000372899.5_2, ENST00000372901.1_2, ENST00000372903.6_1]	chr6:42531799-42661242	+	-	49	129443	8840	714	8126	0.919231	ENST00000372899.5_2, ENST00000372901.1_2, ENST00000372903.6_1	UBR2	protein_coding	UBR2	2.1	2.79	2.19	2.86	3.14	3.28	3.39	3.65	2.77	291.189	-0.239705	-1.60353	0.108817	0.252654	291.189	-0.0448171	-0.304393	0.760828	0.999983
ENSG00000024422.12_4	5	4	[ENST00000263277.8_2, ENST00000538399.1_1, ENST00000540884.1_1, ENST00000596225.5_1, ENST00000602215.1_1]	chr19:48216678-48246391	+	-	8	29713	3844	625	3219	0.837409	ENST00000263277.8_2, ENST00000538399.1_1, ENST00000540884.1_1, ENST00000596225.5_1, ENST00000602215.1_1	EHD2	lncRNA, nonsense_mediated_decay, protein_coding	EHD2	25.14	26.63	28.44	23.14	22.22	25.42	24.12	23.88	28.35	1114.64	0.288634	1.91505	0.0554861	0.160194	1114.64	-0.0894712	-0.592706	0.553378	0.999983
ENSG00000024526.17_4	5	4	[ENST00000370966.9_2, ENST00000456315.7_3, ENST00000488146.5_1, ENST00000489862.1_1, ENST00000525124.1_3]	chr1:68939834-68962904	-	-	12	23070	5904	926	4978	0.843157	ENST00000370966.9_2, ENST00000456315.7_3, ENST00000488146.5_1, ENST00000489862.1_1, ENST00000525124.1_3	DEPDC1	nonsense_mediated_decay, protein_coding, retained_intron	DEPDC1	2.92	5	4.3	6.68	8.69	9.33	6.62	9.27	4.87	242.002	-0.532316	-2.46553	0.0136812	0.0590107	242.002	0.296578	1.40852	0.158976	0.923258
ENSG00000024862.17_4	3	3	[ENST00000332797.10_2, ENST00000611852.4_2, ENST00000617445.4_2]	chr6:139094645-139114456	+	-	6	19811	1507	0	1507	1	ENST00000332797.10_2, ENST00000611852.4_2, ENST00000617445.4_2	CCDC28A	protein_coding	CCDC28A	0.51	0.74	0.51	1.16	1.16	0.98	0.83	1.96	0.44	12.7379	-0.633487	-1.01781	0.308768	0.500083	12.7379	0.0890277	0.150458	0.880403	0.999983
ENSG00000025039.14_2	3	3	[ENST00000359203.3_1, ENST00000369415.8_1, ENST00000492783.1_1]	chr6:90074354-90121989	-	-	8	47635	5072	299	4773	0.941049	ENST00000359203.3_1, ENST00000369415.8_1, ENST00000492783.1_1	RRAGD	lncRNA, protein_coding	RRAGD	1.5	2.06	1.39	1.37	1.24	1.19	2	1.53	1.37	43.9454	0.238079	0.732398	0.463926	0.644036	43.9454	-0.330906	-1.00571	0.314553	0.999983
ENSG00000025156.12_4	3	3	[ENST00000368455.8_1, ENST00000452194.5_1, ENST00000465214.2_3]	chr6:122720690-122754264	+	-	13	33574	2702	129	2573	0.952258	ENST00000368455.8_1, ENST00000452194.5_1, ENST00000465214.2_4	HSF2	protein_coding	HSF2	4.48	3.81	4.06	5.9	7.07	7.56	9.76	7.02	5.82	110.978	-0.625279	-2.56418	0.0103419	0.0485432	110.978	-0.0997835	-0.422574	0.672606	0.999983
ENSG00000025293.17_4	16	14	[ENST00000339089.10_1, ENST00000374000.8_1, ENST00000374012.8_2, ENST00000420233.1_1, ENST00000449988.1_1, ENST00000452270.5_1, ENST00000461122.5_1, ENST00000461405.1_1, ENST00000473943.1_1, ENST00000480940.1_1, ENST00000481202.5_1, ENST00000485604.1_1, ENST00000486408.5_1, ENST00000495338.5_1, ENST00000496305.5_1, ENST00000617560.1_1]	chr20:34359895-34538292	+	-	28	178397	8372	1008	7364	0.879599	ENST00000339089.10_1, ENST00000374000.8_1, ENST00000374012.8_2, ENST00000420233.1_1, ENST00000449988.1_1, ENST00000452270.5_1, ENST00000461122.5_1, ENST00000461405.1_1, ENST00000473943.1_1, ENST00000480940.1_1, ENST00000481202.5_1, ENST00000485604.1_1, ENST00000486408.5_1, ENST00000495338.5_1, ENST00000496305.5_1, ENST00000617560.1_1	PHF20	lncRNA, nonsense_mediated_decay, protein_coding, retained_intron	PHF20	7.01	9.96	7.34	6.58	7.43	6.86	6.82	12.12	6.54	154.531	0.176708	0.789369	0.429896	0.616211	154.531	-0.235901	-1.06436	0.287164	0.999983
ENSG00000025423.11_4	10	8	[ENST00000322165.1_2, ENST00000553476.1_1, ENST00000554150.5_1, ENST00000554155.1_2, ENST00000554643.5_1, ENST00000555159.5_1, ENST00000555805.5_1, ENST00000556481.5_1, ENST00000556650.5_3, ENST00000556875.5_1]	chr12:57145944-57181574	+	-	9	35630	2272	470	1802	0.793134	ENST00000322165.1_2, ENST00000553476.1_1, ENST00000554150.5_1, ENST00000554155.1_2, ENST00000554643.5_1, ENST00000555159.5_1, ENST00000555805.5_1, ENST00000556481.5_1, ENST00000556650.5_3, ENST00000556875.5_1	HSD17B6	lncRNA, protein_coding	HSD17B6	0.36	0.24	0.25	0.49	0.56	0.36	0.6	0.58	0.86	6.83227	-1.0604	-1.39923	0.161745	NA	6.83227	-0.560725	-0.756995	0.449053	0.999983
ENSG00000025434.19_4	35	27	[ENST00000395397.7_1, ENST00000405576.5_2, ENST00000405853.7_1, ENST00000407404.5_1, ENST00000412937.5_2, ENST00000419652.5_1, ENST00000420369.5_1, ENST00000436029.5_2, ENST00000436778.5_1, ENST00000437276.1_2, ENST00000441012.7_2, ENST00000444396.5_3, ENST00000449369.5_2, ENST00000457932.5_2, ENST00000461778.5_1, ENST00000462051.5_1, ENST00000467728.5_1, ENST00000473222.1_1, ENST00000476086.6_1,…	chr11:47269850-47290584	+	-	11	20734	4534	427	4107	0.905823	ENST00000395397.7_1, ENST00000405576.5_2, ENST00000405853.7_1, ENST00000407404.5_1, ENST00000412937.5_2, ENST00000419652.5_1, ENST00000420369.5_1, ENST00000436029.5_2, ENST00000436778.5_1, ENST00000437276.1_2, ENST00000441012.7_2, ENST00000444396.5_4, ENST00000449369.5_2, ENST00000457932.5_2, ENST00000461778.5_1, ENST00000462051.5_1, ENST00000467728.5_1, ENST00000473222.1_1, ENST00000476086.6_1, …	NR1H3	lncRNA, nonsense_mediated_decay, protein_coding, retained_intron	NR1H3	6.82	5.35	6.04	5.3	5.26	7.48	8.14	4.58	7.07	61.5629	0.116602	0.351713	0.725053	0.838983	61.5629	-0.103593	-0.313265	0.75408	0.999983
ENSG00000025708.14_4	17	10	[ENST00000252029.8_2, ENST00000395678.7_1, ENST00000395680.6_2, ENST00000395681.6_2, ENST00000425169.1_4, ENST00000476284.1_1, ENST00000487162.1_1, ENST00000487577.5_2, ENST00000650719.1_1, ENST00000651095.1_1, ENST00000651196.1_1, ENST00000651401.1_1, ENST00000651490.1_1, ENST00000651906.1_1, ENST00000652237.1_1, ENST00000652352.1_1, ENST00000652401.1_1]	chr22:50964180-50968461	-	-	5	4281	3600	513	3087	0.8575	ENST00000252029.8_2, ENST00000395678.7_1, ENST00000395680.6_2, ENST00000395681.6_2, ENST00000425169.1_5, ENST00000468249.1_1, ENST00000476284.1_1, ENST00000487162.1_1, ENST00000487577.5_2, ENST00000535425.5_3, ENST00000543927.6_3, ENST00000638598.2_2, ENST00000650719.1_1, ENST00000651095.1_1, ENST00000651196.1_1, ENST00000651401.1_2, ENST00000651490.1_2, ENST00000651906.1_1, ENST00000652237.1_1, …	ODF3B, SCO2, TYMP	nonsense_mediated_decay, protein_coding, retained_intron	SCO2, ODF3B, TYMP	2.93	0.94	3.15	0.41	0.78	1.65	0.83	2.14	0.29	8.58699	1.52059	1.81648	0.0692966	NA	8.58699	-0.0368797	-0.0411898	0.967145	0.999983
ENSG00000025770.19_4	10	10	[ENST00000299821.15_1, ENST00000395698.7_1, ENST00000395701.7_2, ENST00000418794.1_1, ENST00000420993.7_2, ENST00000518394.5_1, ENST00000520297.5_1, ENST00000522048.1_1, ENST00000522304.1_1, ENST00000523045.5_2]	chr22:50946652-50963209	+	-	20	16557	4459	445	4014	0.900202	ENST00000299821.15_1, ENST00000395698.7_1, ENST00000395701.7_2, ENST00000418794.1_1, ENST00000420993.7_2, ENST00000518394.5_1, ENST00000520297.5_1, ENST00000522048.1_1, ENST00000522304.1_1, ENST00000523045.5_3, ENST00000608319.1_1	NCAPH2, U62317.2	lncRNA, nonsense_mediated_decay, protein_coding, retained_intron	NCAPH2	7.23	6.62	6.72	5.71	6.74	6.09	5.38	9.29	4.97	123.705	0.319741	1.4284	0.153175	0.314275	123.705	-0.0395158	-0.176687	0.859754	0.999983
ENSG00000025772.8_3	1	1	[ENST00000372813.4_2]	chr20:43570770-43589038	-	-	7	18268	1973	0	1973	1	ENST00000372813.4_2	TOMM34	protein_coding	TOMM34	37.59	38.64	37.01	47.46	43.12	45.75	38.13	37.88	37.56	967.555	0.224427	1.75152	0.0798558	0.204994	967.555	0.294425	2.30634	0.0210915	0.499864
ENSG00000025796.14_3	10	10	[ENST00000369002.9_2, ENST00000429168.1_1, ENST00000446496.1_1, ENST00000459782.1_1, ENST00000460009.1_1, ENST00000465210.1_1, ENST00000466419.1_1, ENST00000473746.1_1, ENST00000484803.5_1, ENST00000489455.1_1]	chr6:108188959-108279412	-	-	23	90453	8606	1133	7473	0.868348	ENST00000369002.9_2, ENST00000429168.1_1, ENST00000446496.1_1, ENST00000459782.1_1, ENST00000460009.1_1, ENST00000465210.1_1, ENST00000466419.1_1, ENST00000473746.1_1, ENST00000484803.5_1, ENST00000489455.1_1	SEC63	lncRNA, nonsense_mediated_decay, protein_coding, retained_intron	SEC63	4.06	3.09	5.23	6.32	10.24	6.15	5.79	7.96	4.62	237.947	-0.322466	-1.32769	0.18428	0.355205	237.947	0.342632	1.42938	0.152895	0.913269
ENSG00000025800.14_4	4	4	[ENST00000373625.8_2, ENST00000446515.1_1, ENST00000469790.1_1, ENST00000471599.5_1]	chr1:32573656-32642164	+	-	15	68508	7457	592	6865	0.920612	ENST00000373625.8_2, ENST00000446515.1_1, ENST00000469790.1_1, ENST00000471599.5_1, ENST00000515055.1_1	AL049795.2, KPNA6	lncRNA, nonsense_mediated_decay, protein_coding	KPNA6	15.62	18.95	19.11	18.71	20.03	19.98	18.5	21.46	18.41	1790.18	0.108746	1.12147	0.262089	0.449999	1790.18	0.041875	0.432623	0.665288	0.999983
ENSG00000026025.16_6	10	9	[ENST00000224237.9_2, ENST00000421459.2_2, ENST00000469543.5_1, ENST00000478746.1_2, ENST00000485947.1_1, ENST00000487938.5_1, ENST00000495528.1_1, ENST00000497849.1_4, ENST00000544301.7_3, ENST00000637053.1_1]	chr10:17270239-17279592	+	-	9	9353	5176	306	4870	0.940881	ENST00000224237.9_2, ENST00000421459.2_2, ENST00000469543.5_1, ENST00000478746.1_2, ENST00000485947.1_1, ENST00000487938.5_1, ENST00000495528.1_1, ENST00000497849.1_4, ENST00000544301.7_3, ENST00000637053.1_1	VIM	lncRNA, nonsense_mediated_decay, protein_coding, retained_intron	VIM	1.82	1.12	1.43	0.87	1.76	1.45	0.93	1.58	0.66	29.4823	0.722501	1.68145	0.0926765	0.226493	29.4823	0.403611	0.934715	0.349935	0.999983
ENSG00000026036.22_4	3	3	[ENST00000480273.5_1, ENST00000492259.6_2, ENST00000496281.2_2]	chr20:62290652-62330037	+	-	31	39385	9093	0	9093	1	ENST00000318100.9_2, ENST00000356810.5_2, ENST00000360203.10_2, ENST00000369996.3_3, ENST00000370003.2_2, ENST00000370018.7_2, ENST00000425905.5_4, ENST00000463361.1_1, ENST00000469728.5_2, ENST00000480273.5_1, ENST00000482936.6_2, ENST00000488316.1_2, ENST00000492259.6_2, ENST00000496281.2_2, ENST00000496816.5_2, ENST00000508582.6_2, ENST00000645309.1_1, ENST00000646389.1_1, ENST00000647249.1_1	RTEL1, RTEL1-TNFRSF6B, TNFRSF6B	lncRNA, nonsense_mediated_decay, protein_coding, retained_intron	RTEL1-TNFRSF6B, RTEL1, TNFRSF6B	2.85	2.23	2.01	1.41	0.68	1.34	2.16	2.17	2.38	128.592	0.30972	1.05832	0.28991	0.479653	128.592	-0.936934	-3.12597	0.00177219	0.128273
ENSG00000026103.22_4	21	18	[ENST00000313771.9_1, ENST00000352159.8_1, ENST00000355279.2_1, ENST00000355740.7_2, ENST00000357339.6_1, ENST00000371857.7_1, ENST00000460510.5_1, ENST00000466081.5_1, ENST00000477270.5_1, ENST00000479522.5_1, ENST00000484444.5_1, ENST00000487314.1_1, ENST00000488877.5_1, ENST00000492756.5_1, ENST00000494410.5_1, ENST00000494799.5_1, ENST00000612663.5_2, ENST00000640140.1_1, ENST00000640250.1_1,…	chr10:90750287-90776816	+	-	13	26529	5578	754	4824	0.864826	ENST00000313771.9_1, ENST00000352159.8_1, ENST00000355279.2_1, ENST00000355740.7_2, ENST00000357339.6_1, ENST00000371857.7_1, ENST00000460510.5_1, ENST00000466081.5_1, ENST00000477270.5_1, ENST00000479522.5_1, ENST00000484444.5_1, ENST00000487314.1_1, ENST00000488877.5_1, ENST00000492756.5_1, ENST00000494410.5_1, ENST00000494799.5_1, ENST00000562983.1_1, ENST00000612663.5_2, ENST00000640140.1_1, …	AL157394.1, FAS	lncRNA, nonsense_mediated_decay, protein_coding, retained_intron	FAS	1.59	2.22	1.64	5.32	3.61	2.96	1.56	1.44	1.4	51.5577	0.531699	1.50931	0.13122	0.283918	51.5577	1.47932	4.33433	1.46205e-05	0.00401769
ENSG00000026297.15_5	14	13	[ENST00000028008.9_1, ENST00000358165.7_1, ENST00000366855.10_2, ENST00000421787.5_1, ENST00000467705.6_1, ENST00000476238.6_3, ENST00000478180.6_3, ENST00000496851.6_1, ENST00000499370.6_1, ENST00000508775.5_3, ENST00000509073.1_1, ENST00000510083.1_1, ENST00000611959.1_1, ENST00000620173.4_2]	chr6:167342991-167370679	-	-	16	27688	7643	1373	6270	0.820358	ENST00000028008.9_1, ENST00000358165.7_1, ENST00000366855.10_2, ENST00000421787.5_1, ENST00000467705.6_1, ENST00000476238.6_3, ENST00000478180.6_4, ENST00000496851.6_1, ENST00000499370.6_1, ENST00000507747.1_2, ENST00000508775.5_3, ENST00000509073.1_1, ENST00000510083.1_1, ENST00000611959.1_1, ENST00000620173.4_2	AL159163.1, RNASET2	lncRNA, nonsense_mediated_decay, protein_coding, retained_intron	RNASET2, RP11-514O12.4	9.41	10.47	10.65	12.99	17.05	13.77	19.08	21.78	9.74	145.726	-0.478707	-2.04757	0.0406017	0.129612	145.726	-0.163723	-0.711619	0.476701	0.999983
ENSG00000026508.18_7	39	37	[ENST00000263398.10_1, ENST00000278385.10_3, ENST00000278386.10_1, ENST00000279452.10_3, ENST00000352818.8_1, ENST00000415148.6_1, ENST00000425428.6_1, ENST00000428726.7_2, ENST00000433892.6_1, ENST00000434472.6_1, ENST00000442151.6_4, ENST00000524922.1_1, ENST00000525209.5_1, ENST00000525211.6_4, ENST00000525241.1_1, ENST00000525293.5_1, ENST00000525348.1_1, ENST00000525469.1_3, ENST00000525685.…	chr11:35160416-35253949	+	-	21	93533	10004	152	9852	0.984806	ENST00000263398.10_1, ENST00000278385.10_3, ENST00000278386.10_1, ENST00000279452.10_3, ENST00000352818.8_1, ENST00000415148.6_1, ENST00000425428.6_1, ENST00000428726.7_2, ENST00000433892.6_1, ENST00000434472.6_1, ENST00000442151.6_4, ENST00000524922.1_1, ENST00000525209.5_1, ENST00000525211.6_4, ENST00000525241.1_1, ENST00000525293.5_1, ENST00000525348.1_1, ENST00000525469.1_3, ENST00000525685.6…	CD44	lncRNA, nonsense_mediated_decay, protein_coding, retained_intron	CD44	116.58	110.2	113.49	171.52	154.71	137.62	123.31	100.05	155.43	1708.66	0.05238	0.260049	0.794826	0.884769	1708.66	0.301706	1.50106	0.13334	0.892108
ENSG00000026559.14_4	6	5	[ENST00000371571.5_3, ENST00000424171.5_3, ENST00000433903.5_4, ENST00000439216.5_3, ENST00000447736.1_4, ENST00000506387.1_1]	chr20:49620192-49639644	-	-	6	19452	5415	1393	4022	0.742752	ENST00000371571.5_3, ENST00000424171.5_4, ENST00000433903.5_5, ENST00000439216.5_3, ENST00000447736.1_5, ENST00000506387.1_1	KCNG1	lncRNA, protein_coding	KCNG1	1.46	0.63	0.95	1.48	1.63	0.71	0.55	0.98	0.84	24.2677	0.623945	1.21348	0.224946	0.40827	24.2677	0.718334	1.40348	0.160473	0.924236
ENSG00000026652.14_4	5	5	[ENST00000320285.9_2, ENST00000366905.3_1, ENST00000366911.9_1, ENST00000436279.1_1, ENST00000437165.1_2]	chr6:161550998-161695093	-	-	11	144095	8781	445	8336	0.949322	ENST00000320285.9_2, ENST00000366905.3_1, ENST00000366911.9_1, ENST00000436279.1_1, ENST00000437165.1_2	AGPAT4	nonsense_mediated_decay, protein_coding	AGPAT4	0	0	0	0	0	0	0	0	0
ENSG00000026751.17_4	11	6	[ENST00000359331.8_1, ENST00000368042.7_1, ENST00000368043.8_2, ENST00000441662.6_2, ENST00000444090.6_2, ENST00000458104.6_1, ENST00000458602.6_1, ENST00000484221.1_1, ENST00000488819.1_1, ENST00000495334.1_1, ENST00000621377.4_1]	chr1:160708846-160724611	+	-	6	15765	4833	780	4053	0.83861	ENST00000359331.8_1, ENST00000368042.7_1, ENST00000368043.8_2, ENST00000441662.6_2, ENST00000444090.6_2, ENST00000458104.6_1, ENST00000458602.6_1, ENST00000484221.1_1, ENST00000488819.1_1, ENST00000495334.1_1, ENST00000621377.4_1	SLAMF7	lncRNA, protein_coding, retained_intron	SLAMF7	0	0	0	0	0	0	0	0.03	0.03	0.183854	-1.43319	-0.353971	0.72336	NA	0.183854	-1.62761	-0.401996	0.687687	NA
ENSG00000026950.17_5	11	8	[ENST00000082468.11_1, ENST00000289361.11_4, ENST00000414912.2_2, ENST00000425234.6_2, ENST00000427334.5_1, ENST00000450085.6_1, ENST00000465690.6_1, ENST00000476549.6_2, ENST00000502361.1_1, ENST00000506698.1_1, ENST00000513047.5_1]	chr6:26402464-26415436	+	-	9	12972	5539	1220	4319	0.779744	ENST00000082468.11_1, ENST00000289361.11_4, ENST00000414912.2_2, ENST00000425234.6_2, ENST00000427334.5_1, ENST00000450085.6_1, ENST00000465690.6_1, ENST00000476549.6_2, ENST00000502361.1_1, ENST00000506698.1_1, ENST00000513047.5_1	BTN3A1	protein_coding, retained_intron	BTN3A1	0.24	0.25	0.52	0.3	0.22	0.11	0.03	0.09	0.25	9.11504	1.749	2.11387	0.0345268	NA	9.11504	0.865975	1.01992	0.307764	0.999983
ENSG00000027001.10_4	5	5	[ENST00000382172.4_2, ENST00000433710.2_1, ENST00000464194.3_1, ENST00000469167.1_1, ENST00000494139.1_1]	chr13:24304327-24463539	-	-	21	159212	3388	51	3337	0.984947	ENST00000382172.4_2, ENST00000433710.2_1, ENST00000464194.3_1, ENST00000469167.1_1, ENST00000494139.1_1	MIPEP	lncRNA, protein_coding	MIPEP	1.71	1.73	2.25	3.16	3.86	4.61	4.28	4.97	2.42	90.0837	-0.788094	-2.90435	0.00368012	0.0229938	90.0837	0.0395339	0.152078	0.879125	0.999983
ENSG00000027075.15_5	28	26	[ENST00000332981.10_2, ENST00000536400.5_1, ENST00000552875.2_1, ENST00000553265.5_1, ENST00000553726.5_1, ENST00000553830.1_3, ENST00000553831.5_1, ENST00000553846.1_1, ENST00000553889.5_1, ENST00000554835.1_1, ENST00000555082.5_1, ENST00000555110.1_1, ENST00000555185.5_1, ENST00000555233.5_1, ENST00000555382.5_1, ENST00000555542.5_1, ENST00000555604.1_1, ENST00000555628.5_1, ENST00000555906.5_1…	chr14:61654276-62017694	+	-	38	363418	8830	1239	7591	0.859683	ENST00000332981.10_2, ENST00000536400.5_1, ENST00000552875.2_1, ENST00000553265.5_1, ENST00000553726.5_1, ENST00000553830.1_3, ENST00000553831.5_1, ENST00000553846.1_1, ENST00000553889.5_1, ENST00000554835.1_1, ENST00000555082.5_1, ENST00000555110.1_1, ENST00000555185.5_1, ENST00000555233.5_1, ENST00000555382.5_1, ENST00000555542.5_1, ENST00000555604.1_1, ENST00000555628.5_1, ENST00000555906.5_1,…	AL355916.3, PRKCH	lncRNA, protein_coding	PRKCH, RP11-47I22.4	10.84	12.81	15.89	15.86	15.63	16.11	15.91	20.17	18.35	258.151	-0.229835	-1.32203	0.186158	0.358251	258.151	-0.158259	-0.929114	0.35283	0.999983
ENSG00000027644.5_3	1	1	[ENST00000368195.4_2]	chr1:156809854-156828909	-	-	22	19055	5200	0	5200	1	ENST00000368195.4_2	INSRR	protein_coding	INSRR	0	0	0	0	0	0	0	0	0
ENSG00000027697.14_6	12	9	[ENST00000367739.8_4, ENST00000414770.5_1, ENST00000458076.5_1, ENST00000478333.1_1, ENST00000642390.1_1, ENST00000643119.1_2, ENST00000644894.1_2, ENST00000645045.1_1, ENST00000645753.1_2, ENST00000646036.1_2, ENST00000646898.1_2, ENST00000647124.1_2]	chr6:137518620-137540586	-	-	9	21966	3277	291	2986	0.911199	ENST00000367739.8_4, ENST00000414770.5_1, ENST00000458076.5_1, ENST00000478333.1_1, ENST00000642390.1_1, ENST00000643119.1_2, ENST00000644894.1_2, ENST00000645045.1_1, ENST00000645753.1_2, ENST00000646036.1_2, ENST00000646898.1_2, ENST00000647124.1_2	IFNGR1	lncRNA, nonsense_mediated_decay, protein_coding	IFNGR1	5.98	7.5	5.54	5.95	6.84	6.54	7.96	8.63	4.63	167.934	0.0835033	0.40212	0.687596	0.814441	167.934	-0.0893721	-0.431003	0.666466	0.999983
ENSG00000027847.14_4	8	7	[ENST00000029410.10_2, ENST00000502420.1_1, ENST00000505145.1_1, ENST00000505433.5_1, ENST00000505468.1_1, ENST00000507061.1_2, ENST00000510761.1_1, ENST00000515353.1_1]	chr5:177027132-177037331	+	-	6	10199	4878	1724	3154	0.646576	ENST00000029410.10_2, ENST00000502420.1_1, ENST00000505145.1_1, ENST00000505433.5_1, ENST00000505468.1_1, ENST00000507061.1_2, ENST00000510761.1_1, ENST00000515353.1_1	B4GALT7	nonsense_mediated_decay, protein_coding, retained_intron	B4GALT7	10.71	10.43	14.13	15.86	10.26	13.03	10.57	9.44	9.59	172.042	0.480106	2.04725	0.0406332	0.129631	172.042	0.439609	1.88024	0.0600752	0.716799
ENSG00000027869.11_3	6	6	[ENST00000368198.7_1, ENST00000368199.7_1, ENST00000392306.2_2, ENST00000468744.5_1, ENST00000486350.1_1, ENST00000495306.1_1]	chr1:156776034-156786654	-	-	9	10620	2512	0	2512	1	ENST00000368198.7_1, ENST00000368199.7_1, ENST00000392306.2_2, ENST00000468744.5_1, ENST00000486350.1_1, ENST00000495306.1_1	SH2D2A	lncRNA, protein_coding	SH2D2A	0.25	0.54	0.5	0.05	0	0.26	0.21	0	0.07	2.62424	2.56702	1.73994	0.0818692	NA	2.62424	0.251004	0.159612	0.873187	NA
ENSG00000028116.17_4	10	9	[ENST00000340157.8_1, ENST00000412104.6_1, ENST00000417641.6_1, ENST00000428021.1_2, ENST00000432057.2_1, ENST00000435505.6_1, ENST00000440705.6_1, ENST00000463222.1_1, ENST00000478687.5_1, ENST00000648897.1_1]	chr2:58134763-58387055	+	-	23	252292	3531	734	2797	0.792127	ENST00000340157.8_1, ENST00000412104.6_1, ENST00000417641.6_1, ENST00000428021.1_2, ENST00000432057.2_1, ENST00000435505.6_1, ENST00000440705.6_1, ENST00000463222.1_1, ENST00000478687.5_1, ENST00000648897.1_1	VRK2	lncRNA, nonsense_mediated_decay, protein_coding	VRK2	3.08	3.08	2.89	4.59	5.2	4.92	5.42	5.84	3.79	91.492	-0.494964	-2.19041	0.0284943	0.100329	91.492	0.00378907	0.0175522	0.985996	0.999983
ENSG00000028137.19_4	4	3	[ENST00000376259.7_2, ENST00000489921.1_1, ENST00000492361.1_1, ENST00000536782.2_1]	chr1:12227047-12269285	+	-	10	42238	3778	446	3332	0.881948	ENST00000376259.7_2, ENST00000489921.1_1, ENST00000492361.1_1, ENST00000536782.2_1	TNFRSF1B	lncRNA, protein_coding	TNFRSF1B	0	0	0	0	0	0	0	0	0
ENSG00000028203.18_4	41	31	[ENST00000261219.7_1, ENST00000356859.8_1, ENST00000397792.8_1, ENST00000436874.6_2, ENST00000546365.5_1, ENST00000546398.5_1, ENST00000546409.5_1, ENST00000546445.5_1, ENST00000546557.5_1, ENST00000546951.1_1, ENST00000547484.5_1, ENST00000547611.5_1, ENST00000547894.5_1, ENST00000547997.5_1, ENST00000548245.5_1, ENST00000548371.5_1, ENST00000548455.5_1, ENST00000548822.5_1, ENST00000548838.5_1,…	chr12:95611521-95696575	+	-	23	85054	8766	1219	7547	0.86094	ENST00000261219.7_1, ENST00000356859.8_1, ENST00000397792.8_1, ENST00000436874.6_2, ENST00000546365.5_1, ENST00000546398.5_1, ENST00000546409.5_1, ENST00000546445.5_1, ENST00000546557.5_1, ENST00000546951.1_1, ENST00000547484.5_1, ENST00000547611.5_1, ENST00000547894.5_1, ENST00000547997.5_1, ENST00000548245.5_1, ENST00000548371.5_1, ENST00000548455.5_1, ENST00000548822.5_1, ENST00000548838.5_1, …	VEZT	lncRNA, nonsense_mediated_decay, protein_coding, retained_intron	VEZT	23.56	28.15	22.64	29.79	28.28	29.25	29.2	31.9	28.5	784.561	-0.0394878	-0.315748	0.752194	0.857211	784.561	-0.00317024	-0.0254604	0.979688	0.999983
ENSG00000028277.21_5	20	19	[ENST00000342301.8_2, ENST00000389341.9_1, ENST00000524801.6_5, ENST00000526816.6_2, ENST00000526831.2_3, ENST00000528894.8_1, ENST00000529067.5_1, ENST00000529952.5_2, ENST00000530982.7_1, ENST00000531773.5_1, ENST00000532176.2_3, ENST00000533548.1_1, ENST00000534559.5_1, ENST00000558596.4_2, ENST00000560398.5_3, ENST00000560558.5_1, ENST00000560804.6_3, ENST00000598842.2_3, ENST00000625670.2_1,…	chr19:42590261-42700737	-	-	21	110476	9072	501	8571	0.944775	ENST00000342301.8_2, ENST00000389341.9_1, ENST00000524801.6_5, ENST00000526816.6_2, ENST00000526831.2_3, ENST00000528894.8_1, ENST00000529067.5_1, ENST00000529952.5_2, ENST00000530982.7_1, ENST00000531773.5_1, ENST00000532176.2_3, ENST00000533548.1_1, ENST00000534559.5_1, ENST00000558596.4_2, ENST00000560398.5_3, ENST00000560558.5_1, ENST00000560804.6_3, ENST00000598842.2_3, ENST00000625670.2_1, …	POU2F2	lncRNA, nonsense_mediated_decay, protein_coding, retained_intron	POU2F2	2.26	0.25	0.2	0.76	0.31	0.05	0.36	0.12	0.62	9.37942	1.37593	1.21751	0.22341	NA	9.37942	-0.00650254	-0.00570069	0.995452	0.999983
ENSG00000028310.18_4	19	18	[ENST00000466684.5_1, ENST00000467963.6_4, ENST00000475706.5_1, ENST00000483173.5_3, ENST00000483234.5_1, ENST00000487688.1_1, ENST00000489093.1_1, ENST00000489816.5_1, ENST00000490814.6_1, ENST00000493082.5_1, ENST00000494422.1_1, ENST00000495265.5_1, ENST00000495794.5_1, ENST00000497410.5_1, ENST00000518250.5_1, ENST00000518251.1_1, ENST00000519112.5_1, ENST00000519838.5_1, ENST00000523139.5_1]	chr5:850405-892916	-	-	22	42511	9549	1325	8224	0.861242	ENST00000283441.12_1, ENST00000466684.5_1, ENST00000467963.6_4, ENST00000475706.5_1, ENST00000483173.5_3, ENST00000483234.5_1, ENST00000487688.1_1, ENST00000489093.1_1, ENST00000489816.5_1, ENST00000490814.6_1, ENST00000493082.5_1, ENST00000494422.1_1, ENST00000495265.5_1, ENST00000495794.5_1, ENST00000497410.5_1, ENST00000508951.1_1, ENST00000512775.1_1, ENST00000518250.5_1, ENST00000518251.1_1,…	BRD9, ZDHHC11	lncRNA, nonsense_mediated_decay, protein_coding, retained_intron	BRD9, ZDHHC11	9.44	9.78	8.66	9.36	12.05	10.91	11.1	12.78	8.91	322.875	0.00474769	0.0327715	0.973857	0.985839	322.875	0.0143257	0.0996248	0.920642	0.999983
ENSG00000028528.15_4	14	13	[ENST00000261889.9_1, ENST00000380285.7_1, ENST00000558040.5_2, ENST00000559061.5_1, ENST00000559339.1_1, ENST00000559389.1_1, ENST00000559401.1_1, ENST00000559844.6_2, ENST00000559961.1_1, ENST00000560260.5_1, ENST00000560829.5_1, ENST00000560861.1_1, ENST00000561026.5_1, ENST00000625244.2_1]	chr15:64386321-64438289	+	-	19	51968	9789	2979	6810	0.695679	ENST00000261889.9_1, ENST00000380285.7_1, ENST00000558040.5_2, ENST00000559061.5_1, ENST00000559339.1_1, ENST00000559389.1_2, ENST00000559401.1_1, ENST00000559844.6_2, ENST00000559961.1_1, ENST00000560260.5_1, ENST00000560829.5_1, ENST00000560861.1_1, ENST00000561026.5_1, ENST00000625244.2_1	SNX1	lncRNA, nonsense_mediated_decay, protein_coding, retained_intron	SNX1	31.67	37.1	35.08	42.28	47.49	48.08	56.76	56.29	44.55	773.279	-0.367914	-3.35025	0.000807401	0.00736559	773.279	-0.158279	-1.45303	0.146215	0.907721
ENSG00000028839.10_4	8	6	[ENST00000237264.9_3, ENST00000367869.1_3, ENST00000367871.5_2, ENST00000416965.5_2, ENST00000457715.1_2, ENST00000477527.1_1, ENST00000481694.1_1, ENST00000613034.4_2]	chr6:134273307-134311570	+	-	10	38263	5039	173	4866	0.965668	ENST00000237264.9_3, ENST00000367869.1_3, ENST00000367871.5_2, ENST00000416965.5_2, ENST00000457715.1_2, ENST00000477527.1_1, ENST00000481694.1_1, ENST00000613034.4_2	TBPL1	lncRNA, protein_coding	TBPL1	11.09	14.06	11.05	18.23	21.37	19	17.96	23.72	13.17	169.693	-0.354583	-1.80602	0.0709145	0.18942	169.693	0.141594	0.745794	0.455792	0.999983
ENSG00000029153.14_6	9	6	[ENST00000261178.9_1, ENST00000266503.9_1, ENST00000311001.9_1, ENST00000395901.6_1, ENST00000457040.6_4, ENST00000539558.1_1, ENST00000542388.1_1, ENST00000544915.5_2, ENST00000546179.5_1]	chr12:27485786-27578222	+	-	18	92436	6983	1153	5830	0.834885	ENST00000261178.9_1, ENST00000266503.9_1, ENST00000311001.9_1, ENST00000395901.6_1, ENST00000457040.6_4, ENST00000539558.1_1, ENST00000542388.1_1, ENST00000544915.5_2, ENST00000546179.5_1	ARNTL2	lncRNA, protein_coding	ARNTL2	0.94	1.45	1.41	1.55	3.12	3.64	1.8	2.91	1.93	100.779	-0.568279	-1.85986	0.0629058	0.174722	100.779	0.347068	1.16672	0.243323	0.996768
ENSG00000029363.16_5	24	20	[ENST00000353331.8_3, ENST00000392348.6_3, ENST00000476194.1_1, ENST00000526228.1_1, ENST00000527536.5_4, ENST00000527613.5_1, ENST00000527759.5_1, ENST00000528229.1_1, ENST00000529522.5_1, ENST00000529826.5_3, ENST00000529917.5_1, ENST00000530429.5_1, ENST00000530767.5_2, ENST00000531224.5_1, ENST00000532076.1_1, ENST00000532384.5_1, ENST00000533422.5_2, ENST00000533621.1_2, ENST00000534269.5_1,…	chr6:136577764-136610989	-	-	15	33225	9533	273	9260	0.971363	ENST00000353331.8_3, ENST00000392348.6_3, ENST00000476194.1_1, ENST00000526228.1_1, ENST00000527536.5_4, ENST00000527613.5_1, ENST00000527759.5_1, ENST00000528229.1_1, ENST00000529522.5_1, ENST00000529826.5_4, ENST00000529917.5_1, ENST00000530429.5_1, ENST00000530767.5_2, ENST00000531224.5_1, ENST00000532076.1_1, ENST00000532384.5_1, ENST00000533422.5_2, ENST00000533621.1_3, ENST00000534269.5_1, …	BCLAF1	lncRNA, nonsense_mediated_decay, protein_coding, retained_intron	BCLAF1	49.99	57.79	56.45	87.82	78.91	80.55	81.11	87.12	74.14	1307.93	-0.330514	-2.93099	0.00337884	0.021507	1307.93	0.0657676	0.589677	0.555407	0.999983
ENSG00000029364.12_3	11	9	[ENST00000031146.8_2, ENST00000336643.10_2, ENST00000538956.5_1, ENST00000554023.1_1, ENST00000554059.1_1, ENST00000555245.5_1, ENST00000555840.5_1, ENST00000556125.5_1, ENST00000556605.5_1, ENST00000557046.1_1, ENST00000628474.2_1]	chr14:69864731-69929107	+	-	10	64376	7138	894	6244	0.874755	ENST00000031146.8_2, ENST00000336643.10_2, ENST00000538956.5_1, ENST00000554023.1_1, ENST00000554059.1_1, ENST00000555245.5_1, ENST00000555840.5_1, ENST00000556125.5_1, ENST00000556605.5_1, ENST00000557046.1_1, ENST00000628474.2_1	SLC39A9	lncRNA, nonsense_mediated_decay, protein_coding, retained_intron	SLC39A9	9.21	13.38	12.69	23.23	21.26	24	22.36	23.68	19.83	1093.66	-0.675724	-5.00223	5.66705e-07	2.04539e-05	1093.66	0.0932833	0.70007	0.483884	0.999983
ENSG00000029534.20_6	14	12	[ENST00000265709.13_3, ENST00000289734.12_2, ENST00000314214.12_1, ENST00000335651.6_3, ENST00000347528.8_2, ENST00000348036.8_1, ENST00000518061.1_2, ENST00000518715.2_2, ENST00000520299.5_2, ENST00000521407.1_1, ENST00000522231.5_1, ENST00000522543.5_1, ENST00000524227.5_1, ENST00000645531.1_2]	chr8:41510738-41754280	-	-	48	243542	10797	376	10421	0.965175	ENST00000265709.13_3, ENST00000289734.12_2, ENST00000314214.12_1, ENST00000335651.6_3, ENST00000347528.8_2, ENST00000348036.8_1, ENST00000518061.1_3, ENST00000518715.2_2, ENST00000520299.5_3, ENST00000521407.1_1, ENST00000522231.5_1, ENST00000522543.5_1, ENST00000524227.5_1, ENST00000645531.1_3	ANK1	lncRNA, nonsense_mediated_decay, protein_coding, retained_intron	ANK1	0.05	0.32	0.07	0.21	0.16	0.16	0.11	0.11	0.08	10.2631	0.473552	0.638464	0.523172	NA	10.2631	0.880586	1.21263	0.225271	0.977424
ENSG00000029559.7_3	1	1	[ENST00000226284.7_2]	chr4:88720705-88733587	+	-	7	12882	1573	0	1573	1	ENST00000226284.7_2	IBSP	protein_coding	IBSP	0.05	0.23	0.1	0.06	0.1	0.1	0	0.1	0.07	1.66034	1.35316	0.866355	0.386295	NA	1.66034	0.638751	0.398554	0.690222	NA
ENSG00000029639.11_3	9	8	[ENST00000367166.5_2, ENST00000466349.1_1, ENST00000468889.5_1, ENST00000470239.1_1, ENST00000475849.1_1, ENST00000480390.1_1, ENST00000487586.5_1, ENST00000489874.5_1, ENST00000495806.1_1]	chr6:155577267-155635627	-	-	11	58360	4111	266	3845	0.935295	ENST00000367166.5_2, ENST00000435295.1_1, ENST00000466349.1_1, ENST00000468889.5_1, ENST00000470239.1_1, ENST00000475849.1_1, ENST00000480390.1_1, ENST00000487586.5_1, ENST00000489874.5_1, ENST00000495806.1_1	AL596202.1, TFB1M	lncRNA, protein_coding	TFB1M	2.12	1.89	2.33	3.04	2.72	3.14	6.32	4.83	2.81	38.5587	-0.877645	-2.39651	0.016552	0.0678977	38.5587	-0.598517	-1.69571	0.0899407	0.809485
ENSG00000029725.17_6	7	7	[ENST00000341923.10_1, ENST00000537505.6_2, ENST00000570487.1_1, ENST00000572250.1_4, ENST00000574568.1_3, ENST00000575475.2_1, ENST00000575991.1_1]	chr17:5185559-5289660	+	-	22	104101	7059	358	6701	0.949285	ENST00000341923.10_1, ENST00000537505.6_2, ENST00000570487.1_1, ENST00000572250.1_4, ENST00000574568.1_3, ENST00000575475.2_1, ENST00000575991.1_1	RABEP1	protein_coding, retained_intron	RABEP1	2.88	4.34	3.58	6.52	6.88	5.87	8.21	8.07	6.04	348.5	-0.821219	-5.04857	4.45137e-07	1.68465e-05	348.5	-0.174252	-1.09961	0.271501	0.999983
ENSG00000029993.15_5	5	5	[ENST00000325307.12_3, ENST00000419110.5_2, ENST00000430118.1_3, ENST00000448905.6_2, ENST00000455596.5_2]	chrX:150148981-150159244	+	-	7	10263	3914	0	3914	1	ENST00000325307.12_3, ENST00000419110.5_2, ENST00000430118.1_3, ENST00000448905.6_2, ENST00000455596.5_2	HMGB3	protein_coding	HMGB3	49.52	67.97	63.66	69.57	106.07	94.16	96.01	127.09	70.07	1010.02	-0.44841	-2.66738	0.00764462	0.0388866	1010.02	-0.0753873	-0.450758	0.652164	0.999983
ENSG00000030066.13_4	11	10	[ENST00000378460.6_2, ENST00000526569.1_1, ENST00000526870.1_3, ENST00000527126.1_1, ENST00000527750.1_1, ENST00000528071.5_2, ENST00000528501.5_1, ENST00000529863.1_1, ENST00000530326.5_2, ENST00000531016.1_1, ENST00000532773.1_1]	chr11:47799638-47870107	-	-	36	70469	8576	1016	7560	0.88153	ENST00000378460.6_2, ENST00000526569.1_1, ENST00000526870.1_3, ENST00000527126.1_1, ENST00000527750.1_1, ENST00000528071.5_2, ENST00000528501.5_1, ENST00000529863.1_1, ENST00000530326.5_2, ENST00000531016.1_1, ENST00000532773.1_1	NUP160	lncRNA, nonsense_mediated_decay, protein_coding, retained_intron	NUP160	8.42	10.66	8.08	13.07	13.41	14.74	13.03	13.53	10.86	670.436	-0.230534	-1.75175	0.0798162	0.204972	670.436	0.175314	1.3474	0.177853	0.945671
ENSG00000030110.13_3	3	2	[ENST00000360661.9_1, ENST00000374467.4_2, ENST00000442998.6_1]	chr6:33540323-33548070	-	-	7	7747	2212	0	2212	1	ENST00000360661.9_1, ENST00000374467.4_2, ENST00000442998.6_1	BAK1	protein_coding	BAK1	5.9	6.59	5.23	6.7	5.96	5.66	4.75	6.23	5.72	156.18	0.316153	1.56454	0.11769	0.265847	156.18	0.167631	0.830725	0.406129	0.999983
ENSG00000030304.13_3	7	6	[ENST00000189978.10_1, ENST00000374438.1_1, ENST00000374439.1_1, ENST00000374440.7_1, ENST00000374448.8_2, ENST00000416899.7_2, ENST00000634612.1_1]	chr9:113431050-113563900	+	-	18	132850	4246	0	4246	1	ENST00000189978.10_1, ENST00000374438.1_1, ENST00000374439.1_1, ENST00000374440.7_1, ENST00000374448.8_2, ENST00000416899.7_2, ENST00000634612.1_1	MUSK	lncRNA, protein_coding, retained_intron	MUSK	0	0	0	0	0	0	0	0	0
ENSG00000030419.16_4	14	8	[ENST00000342002.6_2, ENST00000374319.8_1, ENST00000374326.7_1, ENST00000412444.5_1, ENST00000431520.5_1, ENST00000433134.5_3, ENST00000434687.5_1, ENST00000439848.5_1, ENST00000442445.1_1, ENST00000451136.6_1, ENST00000452786.2_3, ENST00000453575.5_1, ENST00000457361.5_1, ENST00000484040.1_1]	chr2:213864414-214017151	-	-	15	152737	12240	206	12034	0.98317	ENST00000342002.6_2, ENST00000374319.8_1, ENST00000374326.7_1, ENST00000412444.5_1, ENST00000431520.5_1, ENST00000433134.5_3, ENST00000434687.5_1, ENST00000439848.5_1, ENST00000442445.1_1, ENST00000451136.6_1, ENST00000452786.2_3, ENST00000453575.5_1, ENST00000457361.5_1, ENST00000484040.1_1	IKZF2	nonsense_mediated_decay, protein_coding, retained_intron	IKZF2	2.6	4.07	3.91	4.32	4.77	4	5.2	5.18	4.21	100.524	-0.243994	-1.08259	0.278991	0.468934	100.524	-0.124373	-0.565978	0.571408	0.999983
ENSG00000030582.18_4	22	15	[ENST00000053867.8_2, ENST00000585348.1_1, ENST00000585512.5_2, ENST00000586242.1_1, ENST00000586443.1_1, ENST00000586782.5_1, ENST00000587109.5_1, ENST00000587387.5_1, ENST00000587518.5_1, ENST00000587958.1_1, ENST00000588143.5_1, ENST00000588170.5_1, ENST00000588237.5_1, ENST00000589265.5_1, ENST00000589536.5_1, ENST00000589923.1_1, ENST00000590984.1_1, ENST00000591740.5_1, ENST00000592323.5_1,…	chr17:42422613-42430474	+	-	11	7861	3524	0	3524	1	ENST00000053867.8_2, ENST00000585348.1_1, ENST00000585512.5_2, ENST00000586242.1_1, ENST00000586443.1_1, ENST00000586782.5_1, ENST00000587109.5_1, ENST00000587387.5_1, ENST00000587518.5_1, ENST00000587958.1_1, ENST00000588143.5_1, ENST00000588170.5_1, ENST00000588237.5_1, ENST00000589265.5_1, ENST00000589536.5_1, ENST00000589923.1_1, ENST00000590984.1_1, ENST00000591740.5_1, ENST00000592323.5_1, …	GRN	lncRNA, nonsense_mediated_decay, protein_coding, retained_intron	GRN	335.01	347.38	367.09	257.86	227.64	271.09	188.95	209.85	224.36	3346.12	0.973644	6.941	3.89338e-12	6.87624e-10	3346.12	0.305763	2.17691	0.029487	0.573658
ENSG00000031003.10_3	11	11	[ENST00000033079.7_2, ENST00000420893.6_2, ENST00000425075.6_1, ENST00000502471.5_2, ENST00000505281.1_1, ENST00000505961.1_2, ENST00000508403.5_2, ENST00000509596.5_2, ENST00000510804.1_1, ENST00000513640.1_1, ENST00000514310.5_2]	chr5:137273648-137387650	-	-	28	114002	6808	97	6711	0.985752	ENST00000033079.7_2, ENST00000420893.6_2, ENST00000425075.6_1, ENST00000502471.5_2, ENST00000505281.1_1, ENST00000505961.1_2, ENST00000508403.5_2, ENST00000509596.5_2, ENST00000510804.1_1, ENST00000513640.1_1, ENST00000514310.5_2	FAM13B	protein_coding, retained_intron	FAM13B	2.07	2.91	2.51	4.21	3.79	3.64	4.42	3.95	5.58	210.993	-0.685403	-3.07733	0.00208862	0.0150358	210.993	-0.238371	-1.08798	0.276603	0.999983
ENSG00000031081.10_4	2	2	[ENST00000264245.8_3, ENST00000482743.1_3]	chr3:119013219-119139561	+	-	13	126342	9384	124	9260	0.986786	ENST00000264245.8_3, ENST00000482743.1_3	ARHGAP31	protein_coding	ARHGAP31	0.02	0.01	0.01	0.01	0	0	0	0	0	0.495317	2.31322	0.790382	0.429304	NA	0.495317	0.513204	0.166168	0.868024	NA
ENSG00000031691.7_3	1	1	[ENST00000335783.4_2]	chr6:49431082-49460820	+	-	9	29738	1741	0	1741	1	ENST00000335783.4_2	CENPQ	protein_coding	CENPQ	0.26	0.61	0.48	0.99	1.33	1.48	1.24	2.11	1.32	21.9058	-1.56836	-3.27601	0.00105286	0.00899779	21.9058	-0.259156	-0.606091	0.544455	0.999983
ENSG00000031698.13_3	6	6	[ENST00000234677.7_2, ENST00000369923.4_2, ENST00000468588.1_1, ENST00000471705.1_1, ENST00000477544.5_1, ENST00000482384.1_1]	chr1:109756539-109780804	+	-	11	24265	3849	125	3724	0.967524	ENST00000234677.7_2, ENST00000369923.4_2, ENST00000468588.1_1, ENST00000471705.1_1, ENST00000477544.5_1, ENST00000482384.1_1	SARS	lncRNA, protein_coding	SARS	40.45	45.87	44.24	46.6	68.03	55.08	55.42	64.31	38.53	1132.18	-0.0311339	-0.215929	0.829043	0.904621	1132.18	0.141293	0.983561	0.325331	0.999983
ENSG00000031823.14_4	30	16	[ENST00000034275.12_1, ENST00000340578.10_2, ENST00000439268.6_1, ENST00000585339.5_1, ENST00000586117.5_1, ENST00000586344.5_1, ENST00000587159.5_1, ENST00000587263.5_1, ENST00000587411.5_1, ENST00000587463.5_1, ENST00000587479.2_1, ENST00000587799.1_1, ENST00000587956.5_1, ENST00000588010.5_1, ENST00000588879.5_1, ENST00000589353.5_1, ENST00000589886.5_1, ENST00000590623.5_1, ENST00000590953.5_…	chr19:5916149-5978153	-	-	21	62004	7445	585	6860	0.921424	ENST00000034275.12_1, ENST00000340578.10_2, ENST00000439268.6_1, ENST00000585339.5_1, ENST00000586117.5_1, ENST00000586344.5_1, ENST00000587159.5_1, ENST00000587263.5_1, ENST00000587411.5_1, ENST00000587463.5_1, ENST00000587479.2_1, ENST00000587799.1_1, ENST00000587956.5_1, ENST00000588010.5_1, ENST00000588879.5_1, ENST00000589353.5_1, ENST00000589886.5_1, ENST00000590623.5_1, ENST00000590953.5_1…	RANBP3	lncRNA, nonsense_mediated_decay, protein_coding, retained_intron	RANBP3	26.37	29.49	25.32	30.31	30.57	30.49	35.18	37.47	35.29	572.088	-0.183126	-1.46236	0.143642	0.300767	572.088	-0.210127	-1.677	0.0935434	0.815988
ENSG00000032219.18_3	11	11	[ENST00000348476.7_2, ENST00000355431.7_2, ENST00000395168.7_1, ENST00000417477.2_1, ENST00000424658.5_1, ENST00000431317.6_2, ENST00000431612.5_1, ENST00000445108.5_1, ENST00000466065.1_1, ENST00000469635.1_1, ENST00000553355.1_1]	chr14:58765102-58840605	+	-	26	75503	7568	211	7357	0.972119	ENST00000348476.7_2, ENST00000355431.7_2, ENST00000395168.7_1, ENST00000417477.2_1, ENST00000424658.5_1, ENST00000431317.6_2, ENST00000431612.5_1, ENST00000445108.5_1, ENST00000466065.1_1, ENST00000469635.1_1, ENST00000553355.1_1	ARID4A	lncRNA, nonsense_mediated_decay, protein_coding, retained_intron	ARID4A	2.15	2.13	1.52	3.41	2.65	2.79	2.87	3.36	2.43	128.09	-0.340709	-1.47464	0.140309	0.29594	128.09	0.0662444	0.290179	0.771679	0.999983
ENSG00000032389.12_7	14	14	[ENST00000382125.8_1, ENST00000398659.8_2, ENST00000406835.6_1, ENST00000435721.5_1, ENST00000441271.1_3, ENST00000443925.6_1, ENST00000444776.1_2, ENST00000455162.5_1, ENST00000462515.1_1, ENST00000463662.5_1, ENST00000470625.1_1, ENST00000478754.5_1, ENST00000482570.5_1, ENST00000496433.5_1]	chr2:3192695-3381653	-	-	19	188958	5775	806	4969	0.860433	ENST00000382125.8_1, ENST00000398659.8_2, ENST00000406835.6_1, ENST00000435721.5_1, ENST00000441271.1_4, ENST00000443925.6_1, ENST00000444776.1_3, ENST00000455162.5_1, ENST00000462515.1_1, ENST00000463662.5_1, ENST00000470625.1_1, ENST00000478754.5_1, ENST00000482570.5_1, ENST00000496433.5_1	EIPR1	lncRNA, nonsense_mediated_decay, protein_coding, retained_intron	TSSC1	16.01	14.74	19.34	20.67	19.68	20.05	25	26.41	24.83	230.136	-0.37417	-2.19214	0.0283692	0.100154	230.136	-0.303887	-1.80982	0.0703231	0.751395
ENSG00000032444.16_4	25	24	[ENST00000221249.10_3, ENST00000414982.7_2, ENST00000450331.7_3, ENST00000545201.6_1, ENST00000593924.5_1, ENST00000594098.1_1, ENST00000594551.1_3, ENST00000594754.5_1, ENST00000594864.1_1, ENST00000595176.5_1, ENST00000595264.5_1, ENST00000595352.1_1, ENST00000595889.1_1, ENST00000596515.5_1, ENST00000597202.1_1, ENST00000598462.1_1, ENST00000599311.5_1, ENST00000599947.1_1, ENST00000599951.1_1…	chr19:7598889-7626650	+	-	33	27761	7172	66	7106	0.990797	ENST00000221249.10_3, ENST00000414982.7_2, ENST00000450331.7_4, ENST00000545201.6_1, ENST00000593924.5_1, ENST00000594098.1_1, ENST00000594551.1_4, ENST00000594754.5_1, ENST00000594864.1_1, ENST00000595176.5_1, ENST00000595264.5_2, ENST00000595352.1_1, ENST00000595889.1_1, ENST00000596515.5_1, ENST00000597202.1_1, ENST00000598462.1_1, ENST00000599311.5_1, ENST00000599947.1_1, ENST00000599951.1_1,…	AC008878.2, PNPLA6	lncRNA, nonsense_mediated_decay, protein_coding, retained_intron	CTD-2207O23.10, PNPLA6	7.81	8.95	7.34	5.52	5.09	6.76	6.03	9.06	4.72	119.187	0.540406	2.33182	0.0197103	0.0772891	119.187	-0.131822	-0.562456	0.573805	0.999983
ENSG00000032742.17_5	7	7	[ENST00000319980.10_1, ENST00000351808.9_1, ENST00000389373.3_4, ENST00000461115.5_1, ENST00000470695.1_1, ENST00000482172.5_1, ENST00000537103.2_1]	chr13:21141207-21265576	+	-	28	124369	6111	979	5132	0.839797	ENST00000319980.10_1, ENST00000351808.9_1, ENST00000389373.3_4, ENST00000461115.5_1, ENST00000470695.1_1, ENST00000482172.5_1, ENST00000537103.2_1	IFT88	lncRNA, protein_coding	IFT88	1.68	3.58	4.12	4.45	4.54	3.09	4.12	5.77	2.91	64.4155	-0.222396	-0.642926	0.520272	0.689381	64.4155	-0.0293376	-0.0864067	0.931143	0.999983
ENSG00000033011.12_5	9	9	[ENST00000262374.9_2, ENST00000544428.1_3, ENST00000586840.1_1, ENST00000588623.5_3, ENST00000591783.5_1, ENST00000591822.5_1, ENST00000592661.1_1, ENST00000592793.5_1, ENST00000650085.1_1]	chr16:5083923-5137380	+	-	16	53457	4553	651	3902	0.857017	ENST00000262374.9_2, ENST00000544428.1_3, ENST00000586840.1_1, ENST00000588623.5_3, ENST00000588778.1_1, ENST00000591783.5_1, ENST00000591822.5_1, ENST00000592661.1_1, ENST00000592793.5_1, ENST00000632058.1_1, ENST00000650085.1_1	ALG1, NAGPA-AS1	lncRNA, nonsense_mediated_decay, protein_coding, retained_intron	ALG1	25.03	24.38	21.44	22.78	30.04	26.84	18.53	26.33	23.56	440.899	0.289373	1.7658	0.0774294	0.201166	440.899	0.24855	1.51881	0.12881	0.883485
ENSG00000033030.13_4	10	10	[ENST00000536306.5_2, ENST00000536663.5_3, ENST00000538116.5_1, ENST00000538493.1_1, ENST00000540586.1_1, ENST00000542892.2_1, ENST00000543897.5_3, ENST00000544054.5_1, ENST00000546149.1_1, ENST00000633063.1_1]	chr12:122956146-122985620	-	-	13	29474	9124	2250	6874	0.753398	ENST00000536306.5_2, ENST00000536663.5_3, ENST00000538116.5_1, ENST00000538493.1_1, ENST00000540586.1_1, ENST00000542892.2_1, ENST00000543897.5_3, ENST00000544054.5_1, ENST00000546149.1_1, ENST00000633063.1_1	ZCCHC8	protein_coding, retained_intron	ZCCHC8	15.5	18.1	15.38	16.59	16.1	18.17	20.08	20.95	19.23	502.89	-0.0708848	-0.539966	0.589221	0.744853	502.89	-0.213459	-1.62932	0.103245	0.836394
ENSG00000033050.9_4	5	5	[ENST00000287844.7_3, ENST00000441774.1_2, ENST00000468073.5_2, ENST00000473874.1_1, ENST00000477252.1_1]	chr7:150908569-150924291	-	-	17	15722	5158	968	4190	0.81233	ENST00000222388.6_2, ENST00000287844.7_3, ENST00000441774.1_2, ENST00000468073.5_2, ENST00000473874.1_1, ENST00000477252.1_1	ABCF2	lncRNA, protein_coding	ABCF2	8.36	17.53	10.51	27.78	16.65	19.63	17.89	9.31	26.86	553.215	-0.408105	-0.789464	0.429841	0.616211	553.215	0.23954	0.463661	0.64289	0.999983
ENSG00000033100.16_4	4	3	[ENST00000035307.6_2, ENST00000465601.1_1, ENST00000482173.5_1, ENST00000495645.5_2]	chr7:150929574-150935913	+	-	5	6339	4205	0	4205	1	ENST00000035307.6_2, ENST00000390183.1, ENST00000465601.1_1, ENST00000482173.5_1, ENST00000495645.5_2	CHPF2, MIR671	miRNA, nonsense_mediated_decay, protein_coding	CHPF2	4.11	4.39	5.1	5.45	5.22	4.36	4.49	5.47	4.39	234.762	0.158308	0.935358	0.349604	0.540679	234.762	0.10306	0.611361	0.54096	0.999983
ENSG00000033122.19_4	15	14	[ENST00000035383.10_3, ENST00000310961.9_2, ENST00000370958.5_1, ENST00000415775.2_1, ENST00000441830.1_1, ENST00000565615.1_1, ENST00000588515.5_4, ENST00000607936.5_2, ENST00000608470.5_2, ENST00000608744.5_4, ENST00000608815.5_3, ENST00000609072.5_3, ENST00000609498.5_3, ENST00000651217.1_1, ENST00000651989.1_1]	chr1:70033943-70617628	+	-	37	583685	14789	369	14420	0.975049	ENST00000310961.9_3, ENST00000370958.5_1, ENST00000415775.2_1, ENST00000441830.1_1, ENST00000565615.1_1, ENST00000588515.5_4, ENST00000607936.5_2, ENST00000608470.5_2, ENST00000608744.5_4, ENST00000608815.5_3, ENST00000609072.5_3, ENST00000609498.5_3, ENST00000651217.1_1, ENST00000651989.1_1	LRRC7	lncRNA, nonsense_mediated_decay, protein_coding, retained_intron	LRRC7	0	0.02	0	0.04	0	0	0	0	0.1	0.729758	-1.76201	-0.579641	0.562157	NA	0.729758	-1.29553	-0.433709	0.6645	NA
ENSG00000033170.16_3	15	15	[ENST00000342677.10_1, ENST00000358307.6_1, ENST00000360689.9_1, ENST00000394586.6_1, ENST00000549235.6_1, ENST00000553924.5_1, ENST00000554610.1_2, ENST00000554667.1_1, ENST00000554765.1_1, ENST00000555559.5_1, ENST00000556292.1_1, ENST00000556518.5_2, ENST00000557164.5_1, ENST00000557338.5_1, ENST00000557536.5_1]	chr14:65877309-66210839	+	-	21	333530	6700	1003	5697	0.850298	ENST00000342677.10_1, ENST00000358307.6_1, ENST00000360689.9_1, ENST00000394586.6_1, ENST00000549235.6_1, ENST00000553924.5_1, ENST00000554610.1_2, ENST00000554667.1_1, ENST00000554765.1_1, ENST00000555559.5_1, ENST00000556292.1_1, ENST00000556518.5_2, ENST00000557164.5_1, ENST00000557338.5_1, ENST00000557536.5_1	FUT8	lncRNA, nonsense_mediated_decay, protein_coding	FUT8	18.88	18.77	22.13	33.61	33.14	30.98	34.92	33.76	33.66	713.019	-0.548268	-4.03645	5.42671e-05	0.000901909	713.019	-0.0371155	-0.277429	0.781451	0.999983
ENSG00000033178.13_3	6	6	[ENST00000322244.10_2, ENST00000420827.2_1, ENST00000429659.7_1, ENST00000505673.2_1, ENST00000506571.1_1, ENST00000514261.1_1]	chr4:68478369-68566873	-	-	32	88504	11408	4083	7325	0.642093	ENST00000322244.10_2, ENST00000420827.2_1, ENST00000429659.7_1, ENST00000505673.2_1, ENST00000506571.1_1, ENST00000514261.1_1	UBA6	nonsense_mediated_decay, protein_coding, retained_intron	UBA6	3.46	7.51	8.71	6.09	9.18	7.17	12.08	14.82	7.47	201.859	-0.574337	-2.04557	0.0407987	0.129909	201.859	-0.565951	-2.03362	0.0419898	0.641376
ENSG00000033327.13_4	7	7	[ENST00000340149.6_1, ENST00000361507.5_2, ENST00000526030.1_1, ENST00000528329.1_2, ENST00000528886.5_3, ENST00000530915.1_3, ENST00000534823.1_1]	chr11:77926338-78129394	-	-	15	203056	6775	376	6399	0.944502	ENST00000340149.6_1, ENST00000361507.5_2, ENST00000526030.1_1, ENST00000528329.1_2, ENST00000528886.5_4, ENST00000530915.1_4, ENST00000534823.1_1	GAB2	lncRNA, protein_coding, retained_intron	GAB2	3.84	5.77	6.29	2.99	3.57	6.67	8.05	5.38	6.91	250.469	-0.150378	-0.523823	0.600401	0.753765	250.469	-0.617136	-2.1463	0.0318492	0.588643
ENSG00000033627.16_4	25	23	[ENST00000264649.10_2, ENST00000343619.8_1, ENST00000393829.6_2, ENST00000537728.5_1, ENST00000544137.5_1, ENST00000585525.5_1, ENST00000585828.5_1, ENST00000586001.1_1, ENST00000586201.5_1, ENST00000586315.1_1, ENST00000587299.1_1, ENST00000587375.1_1, ENST00000587510.5_1, ENST00000587797.1_1, ENST00000587824.5_1, ENST00000587882.5_1, ENST00000588138.1_1, ENST00000588629.1_1, ENST00000588806.1_1…	chr17:40610861-40674629	+	-	27	63768	10955	859	10096	0.921588	ENST00000264649.10_2, ENST00000343619.8_1, ENST00000393829.6_2, ENST00000537728.5_1, ENST00000544137.5_1, ENST00000585525.5_1, ENST00000585828.5_1, ENST00000586001.1_1, ENST00000586201.5_1, ENST00000586315.1_1, ENST00000587299.1_1, ENST00000587375.1_1, ENST00000587510.5_1, ENST00000587797.1_1, ENST00000587824.5_1, ENST00000587882.5_1, ENST00000588138.1_1, ENST00000588629.1_1, ENST00000588806.1_1,…	AC067852.3, ATP6V0A1	lncRNA, nonsense_mediated_decay, protein_coding, retained_intron	ATP6V0A1	30.09	28.82	27.24	25.08	23.5	24.57	26	21.38	27.06	853.846	0.430754	2.57486	0.0100282	0.0475764	853.846	-0.00556639	-0.0332527	0.973473	0.999983
ENSG00000033800.13_2	8	8	[ENST00000249636.10_1, ENST00000545237.1_2, ENST00000562190.1_1, ENST00000563996.1_1, ENST00000564009.1_1, ENST00000564915.5_1, ENST00000567417.1_1, ENST00000611270.1_1]	chr15:68346516-68490941	+	-	21	144425	10776	453	10323	0.957962	ENST00000249636.10_1, ENST00000545237.1_2, ENST00000562190.1_1, ENST00000563996.1_1, ENST00000564009.1_1, ENST00000564915.5_1, ENST00000567417.1_1, ENST00000611270.1_1	PIAS1	lncRNA, nonsense_mediated_decay, protein_coding, retained_intron	PIAS1	29.69	24.86	26.32	35.96	33.17	30.82	37.94	36.73	32.11	822.144	-0.163408	-1.11701	0.26399	0.452018	822.144	-0.0599892	-0.411722	0.680543	0.999983
ENSG00000033867.16_4	18	8	[ENST00000295736.9_1, ENST00000419036.5_1, ENST00000425128.6_1, ENST00000428005.1_1, ENST00000428179.1_1, ENST00000428386.5_3, ENST00000437179.5_4, ENST00000437266.5_1, ENST00000438530.5_1, ENST00000440156.5_3, ENST00000445684.5_2, ENST00000446700.5_2, ENST00000454389.5_3, ENST00000455077.5_2, ENST00000457377.5_1, ENST00000465487.5_1, ENST00000475120.1_1, ENST00000491211.1_1]	chr3:27414211-27525911	-	-	31	111700	9616	0	9616	1	ENST00000295736.9_1, ENST00000419036.5_1, ENST00000425128.6_1, ENST00000428005.1_1, ENST00000428179.1_1, ENST00000428386.5_3, ENST00000437179.5_4, ENST00000437266.5_1, ENST00000438530.5_1, ENST00000440156.5_3, ENST00000445684.5_2, ENST00000446700.5_2, ENST00000454389.5_3, ENST00000455077.5_2, ENST00000457377.5_1, ENST00000465487.5_1, ENST00000475120.1_1, ENST00000491211.1_1	SLC4A7	nonsense_mediated_decay, protein_coding, retained_intron	SLC4A7	3.46	3.08	3.36	2.69	4.39	3.28	3.78	6.65	2.47	204.469	-0.101149	-0.38474	0.70043	0.823311	204.469	-0.249902	-0.959176	0.33747	0.999983
ENSG00000034053.14_5	12	11	[ENST00000382938.3_1, ENST00000411764.5_2, ENST00000558206.1_3, ENST00000558259.5_2, ENST00000558330.5_2, ENST00000558358.1_3, ENST00000558402.5_2, ENST00000558804.5_4, ENST00000559709.5_2, ENST00000559814.5_1, ENST00000560283.5_4, ENST00000561069.5_2]	chr15:29129628-29410518	+	-	23	280890	6869	474	6395	0.930994	ENST00000382938.3_1, ENST00000411764.5_2, ENST00000558206.1_3, ENST00000558259.5_2, ENST00000558330.5_2, ENST00000558358.1_3, ENST00000558402.5_2, ENST00000558804.5_4, ENST00000559709.5_2, ENST00000559814.5_1, ENST00000560283.5_4, ENST00000561069.5_2	APBA2	protein_coding, retained_intron	APBA2	0	0	0	0	0.12	0	0	0	0
ENSG00000034152.18_4	15	9	[ENST00000316920.10_1, ENST00000342679.8_1, ENST00000361818.9_1, ENST00000395491.6_1, ENST00000477540.1_1, ENST00000479129.5_1, ENST00000483928.6_1, ENST00000496046.5_1, ENST00000526076.6_4, ENST00000527123.1_2, ENST00000529517.1_3, ENST00000534743.1_1, ENST00000583508.1_1, ENST00000613338.4_1, ENST00000627447.1_1]	chr17:21187983-21218552	+	-	16	30569	3783	283	3500	0.925192	ENST00000316920.10_1, ENST00000342679.8_1, ENST00000361818.9_1, ENST00000395491.6_1, ENST00000477540.1_1, ENST00000479129.5_1, ENST00000483928.6_1, ENST00000496046.5_1, ENST00000526076.6_5, ENST00000527123.1_3, ENST00000529517.1_4, ENST00000534743.1_1, ENST00000583508.1_1, ENST00000613338.4_1, ENST00000627447.1_1	MAP2K3	lncRNA, nonsense_mediated_decay, protein_coding, retained_intron	MAP2K3	65.48	49.57	58.04	41.59	37.58	45.04	46.25	55.81	44.78	806.529	0.480495	3.05951	0.00221701	0.015783	806.529	-0.202609	-1.28735	0.197973	0.962467
ENSG00000034239.11_3	9	7	[ENST00000262103.8_2, ENST00000433756.1_1, ENST00000519425.1_1, ENST00000521002.5_1, ENST00000521701.5_1, ENST00000521721.1_1, ENST00000522254.5_1, ENST00000523008.5_1, ENST00000523092.5_1]	chr8:49623347-49647870	-	-	11	24523	5822	1788	4034	0.692889	ENST00000262103.8_2, ENST00000433756.1_1, ENST00000519425.1_1, ENST00000521002.5_1, ENST00000521701.5_1, ENST00000521721.1_1, ENST00000522254.5_1, ENST00000523008.5_1, ENST00000523092.5_1	EFCAB1	lncRNA, nonsense_mediated_decay, protein_coding, retained_intron	EFCAB1	0	0	0	0	0	0	0	0	0
ENSG00000034510.6_3	1	1	[ENST00000233143.6_2]	chr2:85132779-85133795	+	-	3	1016	461	0	461	1	ENST00000233143.6_2	TMSB10	protein_coding	TMSB10	541.82	531.05	592.63	326.99	529.25	431.21	442.48	571.02	331.78	1946.8	0.560278	3.55241	0.000381723	0.00410862	1946.8	-0.0226503	-0.143319	0.886038	0.999983
ENSG00000034533.11_5	8	8	[ENST00000264992.7_2, ENST00000504725.1_3, ENST00000504964.1_1, ENST00000505290.1_3, ENST00000505545.5_3, ENST00000507978.5_1, ENST00000509060.1_3, ENST00000514044.5_2]	chr3:130732718-130746493	-	-	10	13775	3427	196	3231	0.942807	ENST00000264992.7_2, ENST00000504725.1_3, ENST00000504964.1_1, ENST00000505290.1_3, ENST00000505545.5_3, ENST00000507978.5_1, ENST00000509060.1_3, ENST00000514044.5_2	ASTE1	nonsense_mediated_decay, protein_coding	ASTE1	3.1	3.41	2.49	2.34	4.6	3.94	4	4.87	5.93	102.614	-0.486505	-1.70524	0.0881495	0.219487	102.614	-0.419516	-1.49291	0.13546	0.893136
ENSG00000034677.13_4	15	14	[ENST00000341084.7_2, ENST00000432381.2_1, ENST00000517584.5_1, ENST00000519342.1_1, ENST00000519449.5_1, ENST00000519527.5_1, ENST00000520071.1_1, ENST00000520903.1_1, ENST00000522182.1_1, ENST00000522369.5_1, ENST00000523167.1_1, ENST00000523255.5_1, ENST00000523481.5_1, ENST00000523644.1_1, ENST00000524233.1_1]	chr8:101269287-101348446	-	-	16	79159	5852	515	5337	0.911996	ENST00000341084.7_2, ENST00000432381.2_1, ENST00000517584.5_1, ENST00000519342.1_1, ENST00000519449.5_1, ENST00000519527.5_1, ENST00000520071.1_1, ENST00000520903.1_1, ENST00000522182.1_1, ENST00000522369.5_1, ENST00000523167.1_1, ENST00000523255.5_1, ENST00000523481.5_1, ENST00000523644.1_1, ENST00000524233.1_1	RNF19A	lncRNA, protein_coding, retained_intron	RNF19A	3.09	3.95	4.37	2.5	4.29	2.78	4.49	5.59	3.97	130.286	-0.070175	-0.309101	0.757245	0.860615	130.286	-0.529327	-2.35173	0.0186865	0.476774
ENSG00000034693.15_4	3	3	[ENST00000367591.5_2, ENST00000367592.5_1, ENST00000585848.1_1]	chr6:143771941-143811753	+	-	12	39812	2830	0	2830	1	ENST00000367591.5_2, ENST00000367592.5_1, ENST00000585848.1_1, ENST00000591892.2_1	AL031320.2, PEX3	lncRNA, protein_coding, retained_intron	PEX3	5.69	7.22	5.64	6.14	7.52	7.68	7.71	7.41	6.13	163.953	0.0384734	0.211757	0.832296	0.906554	163.953	0.0383723	0.213758	0.830736	0.999983
ENSG00000034713.8_3	5	5	[ENST00000037243.7_2, ENST00000563744.1_1, ENST00000565057.5_1, ENST00000565985.1_1, ENST00000568455.1_1]	chr16:75600272-75611779	+	-	5	11507	3010	456	2554	0.848505	ENST00000037243.7_2, ENST00000563744.1_1, ENST00000565057.5_1, ENST00000565985.1_1, ENST00000568455.1_1	GABARAPL2	lncRNA, protein_coding	GABARAPL2	68.17	51.65	66.16	47.76	87.34	59.7	68.59	90.27	43.95	531.214	0.140023	0.624457	0.532328	0.698901	531.214	-0.0138858	-0.0620589	0.950516	0.999983
ENSG00000034971.17_4	2	2	[ENST00000037502.11_2, ENST00000638471.1_1]	chr1:171604556-171621828	-	-	4	17272	2104	0	2104	1	ENST00000037502.11_2, ENST00000638471.1_1	MYOC	nonsense_mediated_decay, protein_coding	MYOC	0	0	0	0	0	0	0	0	0
ENSG00000035115.21_4	29	23	[ENST00000356150.9_1, ENST00000402632.5_1, ENST00000403657.5_1, ENST00000403658.5_1, ENST00000403712.6_1, ENST00000405430.5_1, ENST00000415368.5_1, ENST00000431160.5_2, ENST00000451005.5_2, ENST00000454318.1_2, ENST00000460974.1_1, ENST00000462719.1_1, ENST00000463865.5_1, ENST00000465733.5_1, ENST00000468321.5_1, ENST00000471948.5_1, ENST00000472012.1_1, ENST00000472861.1_1, ENST00000473104.5_1,…	chr2:217729-266398	-	-	25	48669	11165	4732	6433	0.576176	ENST00000356150.9_1, ENST00000402632.5_1, ENST00000403657.5_1, ENST00000403658.5_1, ENST00000403712.6_1, ENST00000405430.5_1, ENST00000415368.5_1, ENST00000431160.5_3, ENST00000451005.5_2, ENST00000454318.1_3, ENST00000460974.1_1, ENST00000462719.1_1, ENST00000463865.5_1, ENST00000465733.5_1, ENST00000468321.5_1, ENST00000471948.5_1, ENST00000472012.1_1, ENST00000472861.1_1, ENST00000473104.5_1, …	SH3YL1	lncRNA, nonsense_mediated_decay, protein_coding, retained_intron	SH3YL1	11.94	14.32	14.39	14.96	17.32	15.64	17.9	23.02	14.31	202.332	-0.204474	-1.21735	0.223472	0.406609	202.332	-0.164198	-0.991592	0.321397	0.999983
ENSG00000035141.8_3	6	5	[ENST00000037869.7_1, ENST00000430566.6_2, ENST00000438759.1_3, ENST00000450256.1_2, ENST00000460307.1_1, ENST00000498665.1_1]	chr2:70523106-70529222	-	-	3	6116	3086	117	2969	0.962087	ENST00000037869.7_1, ENST00000430566.6_2, ENST00000438759.1_3, ENST00000450256.1_2, ENST00000460307.1_1, ENST00000498665.1_1	FAM136A	nonsense_mediated_decay, protein_coding, retained_intron	FAM136A	12.04	14.77	14.08	17.5	25.22	23.23	20.3	25.45	16.43	463.572	-0.364312	-2.44185	0.014612	0.0620753	463.572	0.121835	0.828652	0.407301	0.999983
ENSG00000035403.17_3	7	5	[ENST00000211998.9_2, ENST00000372755.7_1, ENST00000461383.1_1, ENST00000472585.1_1, ENST00000478896.2_1, ENST00000623461.3_1, ENST00000624354.3_1]	chr10:75754950-75881121	+	-	26	126171	9992	426	9566	0.957366	ENST00000211998.9_2, ENST00000372755.7_1, ENST00000461383.1_1, ENST00000472585.1_1, ENST00000478896.2_1, ENST00000623461.3_1, ENST00000624354.3_1	VCL	lncRNA, nonsense_mediated_decay, protein_coding, retained_intron	VCL	15.38	14.88	13.31	12.06	15.79	13.76	16.85	18.92	6.92	600.343	0.306164	1.28027	0.200449	0.376991	600.343	0.0297972	0.124821	0.900665	0.999983
ENSG00000035499.13_3	6	5	[ENST00000265036.10_2, ENST00000453022.6_1, ENST00000505017.1_1, ENST00000509006.1_1, ENST00000512078.5_1, ENST00000512452.1_1]	chr5:59892738-59996017	-	-	14	103279	3806	470	3336	0.876511	ENST00000265036.10_2, ENST00000453022.6_1, ENST00000505017.1_1, ENST00000509006.1_1, ENST00000512078.5_1, ENST00000512452.1_1	DEPDC1B	lncRNA, nonsense_mediated_decay, protein_coding, retained_intron	DEPDC1B	6.54	10.23	9.95	9.95	15.45	12.71	11.77	16.6	13.51	250.739	-0.421617	-2.12411	0.0336612	0.113628	250.739	-0.107838	-0.551666	0.581177	0.999983
ENSG00000035664.11_5	13	10	[ENST00000261891.7_3, ENST00000457488.5_3, ENST00000557867.1_1, ENST00000558064.1_1, ENST00000558069.5_4, ENST00000558076.1_1, ENST00000558482.5_1, ENST00000559007.5_1, ENST00000559306.1_2, ENST00000559731.5_1, ENST00000559897.1_1, ENST00000561162.5_1, ENST00000612884.4_5]	chr15:64199234-64364232	-	-	20	164998	13612	4165	9447	0.69402	ENST00000261891.7_3, ENST00000457488.5_3, ENST00000557867.1_1, ENST00000558064.1_1, ENST00000558069.5_4, ENST00000558076.1_1, ENST00000558482.5_1, ENST00000559007.5_1, ENST00000559306.1_2, ENST00000559731.5_1, ENST00000559897.1_1, ENST00000561162.5_1, ENST00000612884.4_5	DAPK2	lncRNA, nonsense_mediated_decay, protein_coding, retained_intron	DAPK2	3.27	3.56	3.01	1.11	1.71	2.35	1.47	3.21	2.32	27.1588	0.758494	1.79911	0.0720012	0.191243	27.1588	-0.378452	-0.86068	0.389414	0.999983
ENSG00000035681.9_5	18	17	[ENST00000038176.8_2, ENST00000427130.6_1, ENST00000517612.5_1, ENST00000518159.5_1, ENST00000518229.5_1, ENST00000519166.5_1, ENST00000519174.1_1, ENST00000519227.1_1, ENST00000519858.1_1, ENST00000519871.1_1, ENST00000521712.1_1, ENST00000521972.1_1, ENST00000522645.5_1, ENST00000523106.5_1, ENST00000523177.5_1, ENST00000523982.5_1, ENST00000524148.5_1, ENST00000649465.1_1]	chr8:59496066-59572412	-	-	33	76346	6170	470	5700	0.923825	ENST00000038176.8_2, ENST00000427130.6_1, ENST00000517612.5_1, ENST00000518159.5_1, ENST00000518229.5_1, ENST00000519166.5_1, ENST00000519174.1_1, ENST00000519227.1_1, ENST00000519858.1_1, ENST00000519871.1_1, ENST00000521712.1_1, ENST00000521972.1_1, ENST00000522645.5_1, ENST00000523106.5_1, ENST00000523177.5_1, ENST00000523982.5_1, ENST00000524148.5_1, ENST00000649465.1_1	NSMAF	lncRNA, nonsense_mediated_decay, protein_coding, retained_intron	NSMAF	13.09	13.34	16.37	16.4	19.21	18.78	14.18	22.4	15.13	265.756	-0.0302515	-0.173937	0.861915	0.923701	265.756	0.115246	0.67119	0.502099	0.999983
ENSG00000035687.10_4	3	3	[ENST00000366535.4_2, ENST00000462358.1_1, ENST00000468215.1_1]	chr1:244571795-244615211	-	-	13	43416	3441	180	3261	0.94769	ENST00000366535.4_2, ENST00000417765.1_1, ENST00000462358.1_1, ENST00000468215.1_1	ADSS, AL645465.1	lncRNA, protein_coding	ADSS	2.6	4.75	3.74	5.2	7.13	6.3	5.96	6.28	3.87	156.222	-0.312087	-1.38377	0.166428	0.331903	156.222	0.24782	1.1265	0.259954	0.999983
ENSG00000035720.8_3	2	2	[ENST00000265404.7_2, ENST00000396225.1_1]	chr4:68424444-68473055	+	-	9	48611	1951	289	1662	0.851871	ENST00000265404.7_2, ENST00000396225.1_1	STAP1	protein_coding	STAP1	0	0	0	0	0	0	0	0	0
ENSG00000035862.12_4	5	5	[ENST00000262768.11_2, ENST00000536189.6_1, ENST00000585421.5_1, ENST00000586057.5_1, ENST00000592761.2_1]	chr17:76849058-76921469	-	-	6	72411	5633	294	5339	0.947808	ENST00000262768.11_2, ENST00000536189.6_1, ENST00000585421.5_1, ENST00000586057.5_1, ENST00000586713.5_4, ENST00000592761.2_1	CEP295NL, TIMP2	nonsense_mediated_decay, protein_coding	CTD-2373H9.6, TIMP2	8.72	11.32	10.1	9.06	10.89	10.28	8.3	9.74	10.93	456.139	0.276058	1.69881	0.0893556	0.221317	456.139	0.0817368	0.50308	0.614908	0.999983
ENSG00000035928.16_4	17	16	[ENST00000349703.7_2, ENST00000381897.5_1, ENST00000418436.5_1, ENST00000502706.1_1, ENST00000502991.5_1, ENST00000503784.1_3, ENST00000504554.1_2, ENST00000504849.5_1, ENST00000504974.1_1, ENST00000505077.1_1, ENST00000509084.1_1, ENST00000510783.5_1, ENST00000512275.5_1, ENST00000512726.1_1, ENST00000512881.5_1, ENST00000514572.1_1, ENST00000639695.1_1]	chr4:39289075-39367995	-	-	33	78920	6719	549	6170	0.918291	ENST00000349703.7_2, ENST00000381897.5_1, ENST00000418436.5_1, ENST00000502706.1_1, ENST00000502991.5_1, ENST00000503784.1_3, ENST00000504554.1_2, ENST00000504849.5_1, ENST00000504974.1_1, ENST00000505077.1_1, ENST00000509084.1_1, ENST00000510783.5_1, ENST00000512275.5_1, ENST00000512726.1_1, ENST00000512881.5_1, ENST00000514572.1_1, ENST00000639695.1_1	RFC1	lncRNA, nonsense_mediated_decay, protein_coding, retained_intron	RFC1	8.65	9.46	9.84	21.51	21.78	20.55	20.16	24.29	18.84	214.672	-0.94278	-5.84248	5.14296e-09	3.93085e-07	214.672	0.0484673	0.324577	0.745501	0.999983
ENSG00000036054.13_4	9	9	[ENST00000344949.9_3, ENST00000394144.9_4, ENST00000471098.1_1, ENST00000471273.1_1, ENST00000475134.1_1, ENST00000484231.1_1, ENST00000485687.5_1, ENST00000486274.5_1, ENST00000496167.1_1]	chr3:99979835-100044095	+	-	20	64260	5176	0	5176	1	ENST00000344949.9_3, ENST00000394144.9_4, ENST00000471098.1_1, ENST00000471273.1_1, ENST00000475134.1_1, ENST00000484231.1_1, ENST00000485687.5_1, ENST00000486274.5_1, ENST00000496167.1_1	TBC1D23	lncRNA, protein_coding, retained_intron	TBC1D23	0.81	1.02	1.18	1.51	2.36	1.79	2.18	2.53	2.08	62.9947	-0.956471	-3.39271	0.000692056	0.0065619	62.9947	-0.23107	-0.882172	0.377684	0.999983
ENSG00000036257.13_4	16	16	[ENST00000264414.9_2, ENST00000344951.8_1, ENST00000409096.5_1, ENST00000409777.5_1, ENST00000432260.2_3, ENST00000436172.1_3, ENST00000451538.1_3, ENST00000454323.1_2, ENST00000481135.1_1, ENST00000484081.1_1, ENST00000487558.1_1, ENST00000497715.1_1, ENST00000536702.1_1, ENST00000541548.5_1, ENST00000546102.1_1, ENST00000617432.4_1]	chr2:225334866-225450114	-	-	22	115248	11505	1823	9682	0.841547	ENST00000264414.9_2, ENST00000344951.8_1, ENST00000409096.5_1, ENST00000409777.5_1, ENST00000432260.2_3, ENST00000436172.1_3, ENST00000451538.1_3, ENST00000454323.1_2, ENST00000481135.1_1, ENST00000484081.1_1, ENST00000487558.1_1, ENST00000497715.1_1, ENST00000536702.1_1, ENST00000541548.5_1, ENST00000546102.1_1, ENST00000617432.4_1	CUL3	lncRNA, nonsense_mediated_decay, protein_coding, retained_intron	CUL3	26.03	30.95	27.54	35.52	53.12	41.03	50.9	52.6	32.8	815.528	-0.445537	-2.82506	0.00472724	0.0274636	815.528	-0.0337648	-0.215537	0.829349	0.999983
ENSG00000036448.10_3	15	15	[ENST00000262113.9_2, ENST00000517520.1_1, ENST00000518203.5_1, ENST00000518513.1_1, ENST00000518803.1_1, ENST00000519372.5_1, ENST00000519518.5_1, ENST00000519631.5_1, ENST00000520072.5_1, ENST00000520298.5_1, ENST00000520779.1_1, ENST00000523438.1_1, ENST00000523443.5_1, ENST00000612167.4_1, ENST00000621894.4_1]	chr8:1993160-2113475	+	-	50	120315	7052	183	6869	0.97405	ENST00000262113.9_2, ENST00000517520.1_1, ENST00000518203.5_1, ENST00000518513.1_1, ENST00000518803.1_1, ENST00000519372.5_1, ENST00000519518.5_1, ENST00000519631.5_1, ENST00000520072.5_1, ENST00000520298.5_1, ENST00000520779.1_1, ENST00000523438.1_1, ENST00000523443.5_1, ENST00000612167.4_1, ENST00000621894.4_1	MYOM2	lncRNA, protein_coding, retained_intron	MYOM2	0	0	0	0	0	0	0	0	0
ENSG00000036473.8_5	3	3	[ENST00000039007.5_2, ENST00000488812.1_1, ENST00000643344.1_1]	chrX:38211838-38280699	+	-	11	68861	1683	0	1683	1	ENST00000039007.5_2, ENST00000488812.1_1, ENST00000643344.1_1	OTC	lncRNA, nonsense_mediated_decay, protein_coding	OTC	0	0	0	0	0	0	0	0	0
ENSG00000036530.8_2	7	7	[ENST00000261835.7_1, ENST00000380228.6_1, ENST00000554176.5_1, ENST00000554611.5_1, ENST00000554917.5_1, ENST00000556313.1_1, ENST00000556822.1_1]	chr14:100150640-100193638	+	-	18	42998	9352	6458	2894	0.309453	ENST00000261835.7_1, ENST00000380228.6_1, ENST00000554176.5_1, ENST00000554611.5_1, ENST00000554917.5_1, ENST00000556313.1_1, ENST00000556822.1_1	CYP46A1	nonsense_mediated_decay, protein_coding, retained_intron	CYP46A1	0.1	0.08	0.22	0.31	0.27	0.2	0.13	0.18	0.16	10.7983	-0.132664	-0.204178	0.838214	NA	10.7983	0.754845	1.22094	0.22211	0.975961
ENSG00000036549.13_5	11	10	[ENST00000370798.5_1, ENST00000370801.8_2, ENST00000414381.5_1, ENST00000433749.5_1, ENST00000458763.2_1, ENST00000463166.5_1, ENST00000469944.1_1, ENST00000474746.1_1, ENST00000476195.5_1, ENST00000476275.5_1, ENST00000481346.5_1]	chr1:78028100-78149104	-	-	17	121004	9008	773	8235	0.914187	ENST00000370798.5_1, ENST00000370801.8_2, ENST00000414381.5_1, ENST00000433749.5_1, ENST00000458763.2_1, ENST00000463166.5_1, ENST00000469944.1_1, ENST00000474746.1_1, ENST00000476195.5_1, ENST00000476275.5_1, ENST00000481346.5_1	AC118549.1	lncRNA, protein_coding	ZZZ3	5.21	5.2	4.4	6.01	9.17	7.95	6.05	8.91	4.94	267.201	-0.173194	-0.874817	0.381674	0.571841	267.201	0.26021	1.351	0.176694	0.944477
ENSG00000036565.15_5	10	9	[ENST00000265808.11_2, ENST00000276373.10_3, ENST00000381608.8_2, ENST00000437980.3_2, ENST00000440926.3_2, ENST00000517776.5_1, ENST00000519026.5_2, ENST00000519171.1_1, ENST00000522513.5_3, ENST00000524272.1_1]	chr8:20002365-20040717	-	-	19	38352	3910	427	3483	0.890793	ENST00000265808.11_2, ENST00000276373.10_3, ENST00000381608.8_2, ENST00000437980.3_2, ENST00000440926.3_2, ENST00000517776.5_1, ENST00000519026.5_2, ENST00000519171.1_1, ENST00000522513.5_3, ENST00000524272.1_1	SLC18A1	lncRNA, nonsense_mediated_decay, protein_coding, retained_intron	SLC18A1	0	0	0	0	0	0	0	0	0
ENSG00000036672.16_4	7	7	[ENST00000260187.7_2, ENST00000455332.6_1, ENST00000525189.5_1, ENST00000525735.1_1, ENST00000527843.1_3, ENST00000531070.1_3, ENST00000532613.1_1]	chr11:119225924-119252421	-	-	15	26497	4523	55	4468	0.98784	ENST00000260187.7_2, ENST00000455332.6_1, ENST00000525189.5_1, ENST00000525735.1_1, ENST00000527843.1_3, ENST00000531070.1_3, ENST00000532613.1_1	USP2	protein_coding, retained_intron	USP2	1	1.23	1.12	1.57	1.56	0.85	1.18	1.77	1.08	31.5977	-0.0249896	-0.0641462	0.948854	0.970767	31.5977	0.0186178	0.0486543	0.961195	0.999983
ENSG00000036828.16_3	6	6	[ENST00000490131.7_1, ENST00000498619.4_2, ENST00000638296.1_1, ENST00000638421.1_3, ENST00000639785.1_2, ENST00000643573.1_1]	chr3:121902529-122010476	+	-	10	107947	12005	2577	9428	0.785339	ENST00000490131.7_1, ENST00000498619.4_2, ENST00000638296.1_1, ENST00000638421.1_4, ENST00000639785.1_2, ENST00000643573.1_1	CASR	lncRNA, protein_coding, retained_intron	CASR	0.04	0.01	0.02	0.03	0.11	0.11	0.11	0.13	0.04	8.08616	-1.61096	-1.88495	0.0594368	NA	8.08616	-0.0864674	-0.113052	0.90999	0.999983
ENSG00000037042.9_3	3	3	[ENST00000251412.8_2, ENST00000588870.1_1, ENST00000590396.1_1]	chr17:40811301-40819024	+	-	10	7723	2793	251	2542	0.910132	ENST00000251412.8_2, ENST00000588870.1_1, ENST00000590396.1_1	TUBG2	protein_coding, retained_intron	TUBG2	18.14	18.29	15.66	9.33	10.12	9.94	8.81	10.59	11.35	251.513	0.990671	5.59855	2.16152e-08	1.35054e-06	251.513	-0.0376423	-0.207679	0.83548	0.999983
ENSG00000037241.7_3	6	6	[ENST00000265100.6_2, ENST00000519156.1_3, ENST00000519239.5_2, ENST00000519522.1_3, ENST00000519974.5_2, ENST00000521476.5_2]	chr5:172385731-172396774	+	-	7	11043	1164	63	1101	0.945876	ENST00000265100.6_2, ENST00000519156.1_4, ENST00000519239.5_2, ENST00000519522.1_4, ENST00000519974.5_2, ENST00000521476.5_2	RPL26L1	protein_coding	RPL26L1	223.48	215.78	229.65	248.92	316.94	261.69	265.43	282.73	212	1290.67	0.0561943	0.496616	0.61946	0.765743	1290.67	0.156976	1.39251	0.163768	0.930808
ENSG00000037280.16_5	12	8	[ENST00000261937.11_4, ENST00000393347.7_3, ENST00000424276.6_1, ENST00000502293.5_1, ENST00000502603.5_1, ENST00000502649.5_4, ENST00000507059.5_1, ENST00000510000.1_1, ENST00000512795.1_2, ENST00000513527.1_1, ENST00000514810.1_1, ENST00000619105.4_1]	chr5:180028505-180076624	-	-	26	48119	8852	320	8532	0.96385	ENST00000261937.11_4, ENST00000393347.7_3, ENST00000424276.6_1, ENST00000502293.5_1, ENST00000502603.5_1, ENST00000502649.5_4, ENST00000507059.5_1, ENST00000510000.1_1, ENST00000512795.1_2, ENST00000513527.1_1, ENST00000514810.1_1, ENST00000619105.4_1	FLT4	lncRNA, protein_coding, retained_intron	FLT4	0.2	0.32	0.24	0.38	1.03	0.66	1.12	1.27	0.76	27.6908	-1.83433	-4.07125	4.6761e-05	0.000808611	27.6908	-0.604089	-1.41085	0.15829	0.923258
ENSG00000037474.15_3	9	9	[ENST00000264670.11_2, ENST00000502932.1_1, ENST00000504374.5_1, ENST00000505264.1_1, ENST00000505892.5_1, ENST00000506139.5_1, ENST00000507888.1_1, ENST00000513888.5_1, ENST00000514127.1_1]	chr5:6599351-6633404	-	-	19	34053	5506	164	5342	0.970214	ENST00000264670.11_2, ENST00000502932.1_1, ENST00000504374.5_1, ENST00000505264.1_1, ENST00000505892.5_1, ENST00000506139.5_1, ENST00000507888.1_1, ENST00000513888.5_1, ENST00000514127.1_1	NSUN2	lncRNA, nonsense_mediated_decay, protein_coding, retained_intron	NSUN2	11.53	15.13	16.89	16.58	20.67	22.75	17.6	24.55	15.37	565.693	-0.161389	-0.986158	0.324055	0.51629	565.693	0.103607	0.638666	0.52304	0.999983
ENSG00000037637.11_4	4	4	[ENST00000375592.8_2, ENST00000444116.1_2, ENST00000456164.5_2, ENST00000478089.1_1]	chr1:16573334-16678975	-	-	11	105641	9009	755	8254	0.916195	ENST00000375592.8_2, ENST00000444116.1_2, ENST00000456164.5_2, ENST00000478089.1_1	FBXO42	lncRNA, protein_coding	FBXO42	8.3	9.09	9.08	10.26	9.04	10.46	10.02	11.25	9.29	347.743	0.0256012	0.181194	0.856215	0.919898	347.743	-0.00305288	-0.0217628	0.982637	0.999983
ENSG00000037749.12_4	12	9	[ENST00000322602.9_1, ENST00000439768.2_1, ENST00000518497.6_2, ENST00000519325.1_1, ENST00000519612.5_1, ENST00000519928.1_1, ENST00000520327.6_2, ENST00000520899.1_1, ENST00000521527.5_1, ENST00000522177.1_1, ENST00000522440.5_1, ENST00000522782.5_1]	chr5:153418465-153600038	+	-	13	181573	7795	2107	5688	0.729699	ENST00000322602.9_1, ENST00000439768.2_1, ENST00000518497.6_2, ENST00000519325.1_1, ENST00000519612.5_1, ENST00000519928.1_1, ENST00000520327.6_2, ENST00000520899.1_1, ENST00000521527.5_1, ENST00000521781.5_1, ENST00000521786.5_1, ENST00000522177.1_1, ENST00000522440.5_1, ENST00000522782.5_1	GALNT10, MFAP3	lncRNA, protein_coding	MFAP3, GALNT10	11.37	14.78	13.32	19.3	18.94	20.43	20.71	22.68	14.57	219.127	-0.318135	-1.86977	0.0615161	0.171939	219.127	0.0588021	0.352251	0.72465	0.999983
ENSG00000037757.14_4	6	4	[ENST00000040663.8_2, ENST00000319545.12_1, ENST00000588526.5_1, ENST00000589290.1_1, ENST00000591688.5_1, ENST00000593245.5_1]	chr19:13875335-13885096	+	-	5	9761	3466	1778	1688	0.487017	ENST00000040663.8_2, ENST00000319545.12_1, ENST00000588526.5_1, ENST00000589290.1_1, ENST00000591688.5_1, ENST00000593245.5_1	MRI1	protein_coding, retained_intron	C19orf53, MRI1	12.33	8.93	13	9.56	10.97	9.01	9.91	10.71	10.56	322.182	0.370425	1.99596	0.0459383	0.140842	322.182	-0.0506129	-0.272507	0.785232	0.999983
ENSG00000037897.17_5	8	8	[ENST00000257848.7_1, ENST00000324871.12_2, ENST00000547653.1_3, ENST00000548504.1_3, ENST00000548681.1_1, ENST00000549773.1_1, ENST00000551117.1_3, ENST00000553125.5_1]	chr12:58162253-58165902	-	-	7	3649	1947	0	1947	1	ENST00000257848.7_1, ENST00000324871.12_2, ENST00000546609.1_2, ENST00000547653.1_4, ENST00000548504.1_4, ENST00000548681.1_1, ENST00000549773.1_1, ENST00000551117.1_4, ENST00000553125.5_1	CYP27B1, METTL1	lncRNA, nonsense_mediated_decay, protein_coding, retained_intron	METTL1	59.03	46.9	54.22	48.35	55.1	54.13	50.48	53.84	41.1	555.493	0.382596	2.68922	0.00716187	0.037086	555.493	0.151684	1.06788	0.285574	0.999983
ENSG00000037965.6_4	1	1	[ENST00000040584.6_2]	chr12:54402768-54406553	+	-	2	3785	2417	146	2271	0.939595	ENST00000040584.6_2	HOXC8	protein_coding	HOXC8	0.98	0.92	1.27	0.73	1.12	1.32	0.91	1.07	1.38	32.1906	0.146064	0.377226	0.706006	0.827071	32.1906	-0.061412	-0.15849	0.874071	0.999983
ENSG00000038002.9_3	6	4	[ENST00000264595.7_2, ENST00000502310.5_1, ENST00000506853.5_1, ENST00000510635.1_1, ENST00000510955.5_1, ENST00000511231.1_1]	chr4:178351927-178363591	-	-	9	11664	2605	0	2605	1	ENST00000264595.7_2, ENST00000502310.5_1, ENST00000506853.5_1, ENST00000510635.1_1, ENST00000510955.5_1, ENST00000511231.1_1	AGA	lncRNA, protein_coding, retained_intron	AGA	5.32	4.07	3.44	6.89	12.15	6.67	8.99	12.54	8.18	80.4183	-0.982781	-3.25047	0.00115215	0.0095905	80.4183	-0.178871	-0.61079	0.541338	0.999983
ENSG00000038210.13_4	1	1	[ENST00000264864.8_2]	chr4:25235654-25280826	+	-	10	45172	3594	0	3594	1	ENST00000264864.8_3, ENST00000512921.4_2	PI4K2B	protein_coding	PI4K2B	0.56	1.14	1.12	0.85	2.47	1.41	1.26	2.23	1.18	59.5146	-0.487484	-1.24845	0.211866	0.391953	59.5146	0.0441533	0.115469	0.908073	0.999983
ENSG00000038219.13_3	6	6	[ENST00000040738.10_2, ENST00000482713.1_1, ENST00000505343.1_1, ENST00000507943.1_1, ENST00000509897.1_1, ENST00000511119.1_1]	chr4:13570361-13629349	-	-	28	58988	15862	1327	14535	0.916341	ENST00000040738.10_2, ENST00000482713.1_1, ENST00000505343.1_1, ENST00000507943.1_1, ENST00000509897.1_1, ENST00000511119.1_1	BOD1L1	nonsense_mediated_decay, protein_coding, retained_intron	BOD1L1	2.35	2.68	2.7	3.06	3.72	3.08	3.07	3.76	2.87	206.042	-0.090633	-0.568668	0.569582	0.730207	206.042	0.0584079	0.375707	0.707135	0.999983
ENSG00000038274.17_4	8	8	[ENST00000280969.9_2, ENST00000321757.11_3, ENST00000421814.6_1, ENST00000518095.5_1, ENST00000519719.1_1, ENST00000520449.1_1, ENST00000521838.2_1, ENST00000523606.1_1]	chr5:162930119-162946360	+	-	5	16241	5135	829	4306	0.838559	ENST00000280969.9_2, ENST00000321757.11_3, ENST00000421814.6_1, ENST00000518095.5_1, ENST00000519719.1_1, ENST00000520449.1_1, ENST00000521838.2_1, ENST00000523606.1_1	MAT2B	lncRNA, nonsense_mediated_decay, protein_coding, retained_intron	MAT2B	5.87	8.99	6.7	8.99	14.45	12.32	9.93	12.91	8.73	212.572	-0.320958	-1.58942	0.111966	0.257573	212.572	0.212085	1.0769	0.281523	0.999983
ENSG00000038295.8_3	6	5	[ENST00000061240.7_2, ENST00000504560.5_1, ENST00000506144.1_1, ENST00000507499.5_1, ENST00000509505.5_1, ENST00000513213.5_1]	chr4:166794388-167025609	+	-	25	231221	8105	467	7638	0.942381	ENST00000061240.7_2, ENST00000504560.5_1, ENST00000506144.1_1, ENST00000507499.5_1, ENST00000509505.5_1, ENST00000513213.5_1	TLL1	nonsense_mediated_decay, protein_coding	TLL1	0	0	0	0	0	0	0	0	0
ENSG00000038358.15_4	14	13	[ENST00000358933.10_2, ENST00000536072.6_1, ENST00000572031.1_1, ENST00000572221.5_1, ENST00000572724.1_1, ENST00000573985.5_1, ENST00000573992.5_1, ENST00000574770.5_1, ENST00000575033.1_1, ENST00000575507.1_1, ENST00000575514.5_1, ENST00000576972.5_1, ENST00000577028.5_1, ENST00000577105.1_1]	chr16:67906954-67918402	+	-	25	11448	6140	0	6140	1	ENST00000358933.10_2, ENST00000408599.1, ENST00000536072.6_1, ENST00000572031.1_1, ENST00000572067.1_1, ENST00000572221.5_1, ENST00000572724.1_1, ENST00000573985.5_1, ENST00000573992.5_1, ENST00000574770.5_1, ENST00000575033.1_1, ENST00000575507.1_1, ENST00000575514.5_1, ENST00000576972.5_1, ENST00000577028.5_1, ENST00000577105.1_1	AC040162.1, AC040162.3, EDC4	lncRNA, miRNA, protein_coding, retained_intron	EDC4	26.36	23.11	21.31	19.37	22.04	21.24	22.8	30.22	23.19	597.302	0.137713	0.963627	0.335233	0.526999	597.302	-0.245116	-1.71145	0.0869972	0.796346
ENSG00000038382.20_4	25	22	[ENST00000344135.5_1, ENST00000344204.9_2, ENST00000502490.1_1, ENST00000502816.1_1, ENST00000503399.1_1, ENST00000504606.1_1, ENST00000505971.5_1, ENST00000506611.1_1, ENST00000507714.1_1, ENST00000508283.5_1, ENST00000508343.1_1, ENST00000508717.1_1, ENST00000509354.1_1, ENST00000509967.6_1, ENST00000510281.1_1, ENST00000510757.1_1, ENST00000511019.1_1, ENST00000512070.6_1, ENST00000512303.1_1,…	chr5:14143450-14532237	+	-	63	388787	17860	756	17104	0.957671	ENST00000344135.5_1, ENST00000344204.9_2, ENST00000502490.1_1, ENST00000502816.1_1, ENST00000503399.1_1, ENST00000504606.1_1, ENST00000505971.5_1, ENST00000506611.1_1, ENST00000507714.1_1, ENST00000508283.5_1, ENST00000508343.1_1, ENST00000508717.1_1, ENST00000509354.1_1, ENST00000509967.6_1, ENST00000510281.1_1, ENST00000510757.1_1, ENST00000511019.1_1, ENST00000512070.6_1, ENST00000512303.1_1, …	TRIO	lncRNA, nonsense_mediated_decay, protein_coding, retained_intron	TRIO	9.1	9.18	10.76	12.61	10.27	12.97	16.81	16.34	12.39	721.097	-0.411307	-2.66487	0.00770172	0.039072	721.097	-0.303111	-1.99424	0.0461257	0.660729
ENSG00000038427.16_5	12	11	[ENST00000265077.8_2, ENST00000342785.8_3, ENST00000343200.9_3, ENST00000502527.2_2, ENST00000503923.1_1, ENST00000505615.1_1, ENST00000507162.1_1, ENST00000512590.6_2, ENST00000513016.5_1, ENST00000513960.5_3, ENST00000513984.5_1, ENST00000515397.1_1]	chr5:82767436-82878122	+	-	15	110686	14678	0	14678	1	ENST00000265077.8_2, ENST00000342785.8_3, ENST00000343200.9_3, ENST00000502527.2_2, ENST00000503923.1_1, ENST00000505615.1_1, ENST00000507162.1_1, ENST00000512590.6_2, ENST00000513016.5_1, ENST00000513960.5_3, ENST00000513984.5_1, ENST00000515397.1_1	VCAN	lncRNA, protein_coding, retained_intron	VCAN	0	0.12	0	0.04	0.02	0	0	0	0.16	1.48516	-0.166932	-0.0643937	0.948657	NA	1.48516	0.0838705	0.0333805	0.973371	NA
ENSG00000038532.16_5	13	13	[ENST00000261657.5_1, ENST00000409552.4_3, ENST00000409790.6_4, ENST00000428742.6_1, ENST00000436973.5_1, ENST00000459723.1_2, ENST00000463459.1_1, ENST00000463896.5_1, ENST00000465491.5_1, ENST00000476025.5_1, ENST00000487189.5_1, ENST00000494853.1_1, ENST00000646363.1_1]	chr16:11038420-11276043	+	-	31	237623	12523	2047	10476	0.836541	ENST00000261657.5_1, ENST00000409552.4_3, ENST00000409790.6_4, ENST00000428742.6_1, ENST00000436973.5_2, ENST00000459723.1_2, ENST00000463459.1_1, ENST00000463896.5_1, ENST00000465491.5_1, ENST00000476025.5_1, ENST00000487189.5_1, ENST00000494853.1_1, ENST00000646363.1_1	CLEC16A	lncRNA, protein_coding, retained_intron	CLEC16A	6.37	7.13	7.06	7.4	9.35	6.95	7.59	7.21	7.92	387.603	0.078538	0.493011	0.622005	0.767068	387.603	0.0780877	0.491406	0.62314	0.999983
ENSG00000038945.15_5	14	13	[ENST00000262101.10_3, ENST00000350896.3_1, ENST00000355282.6_1, ENST00000381998.8_1, ENST00000445506.6_3, ENST00000517522.1_1, ENST00000518026.5_3, ENST00000518343.5_1, ENST00000518960.5_1, ENST00000519060.6_1, ENST00000520846.1_1, ENST00000521876.5_1, ENST00000522130.1_1, ENST00000522672.5_1]	chr8:15965386-16424999	-	-	27	459613	7812	1295	6517	0.834229	ENST00000262101.10_3, ENST00000350896.3_1, ENST00000355282.6_1, ENST00000381998.8_1, ENST00000445506.6_3, ENST00000517522.1_1, ENST00000518026.5_4, ENST00000518343.5_1, ENST00000518960.5_1, ENST00000519060.6_1, ENST00000520846.1_1, ENST00000521876.5_1, ENST00000522130.1_1, ENST00000522672.5_1	MSR1	lncRNA, nonsense_mediated_decay, protein_coding	MSR1	0	0	0	0	0	0	0	0	0
ENSG00000039068.19_6	14	11	[ENST00000261769.10_3, ENST00000422392.6_2, ENST00000561751.1_1, ENST00000562118.1_1, ENST00000562836.5_1, ENST00000564676.5_1, ENST00000564745.1_1, ENST00000565810.1_1, ENST00000566510.5_1, ENST00000566612.5_1, ENST00000567320.1_1, ENST00000611625.4_2, ENST00000612417.4_1, ENST00000621016.4_1]	chr16:68771194-68869444	+	-	20	98250	6103	886	5217	0.854826	ENST00000261769.10_3, ENST00000422392.6_2, ENST00000561751.1_1, ENST00000562118.1_1, ENST00000562836.5_1, ENST00000564676.5_1, ENST00000564745.1_1, ENST00000565810.1_1, ENST00000566510.5_1, ENST00000566612.5_1, ENST00000567320.1_1, ENST00000611625.4_2, ENST00000612417.4_1, ENST00000621016.4_1	CDH1	lncRNA, nonsense_mediated_decay, protein_coding, retained_intron	CDH1	828.79	756.72	583.34	799.29	805.59	781.05	1020.26	896.17	709.7	14366.7	-0.0330258	-0.208261	0.835025	0.908331	14366.7	-0.100714	-0.63512	0.52535	0.999983
ENSG00000039123.16_5	9	8	[ENST00000230640.10_2, ENST00000502953.1_1, ENST00000503165.5_1, ENST00000504388.5_1, ENST00000504997.1_1, ENST00000505565.5_3, ENST00000506750.5_1, ENST00000508716.1_3, ENST00000518955.1_1]	chr5:54603816-54721407	+	-	28	117591	6347	1187	5160	0.812983	ENST00000230640.10_2, ENST00000502953.1_1, ENST00000503165.5_1, ENST00000504388.5_1, ENST00000504997.1_1, ENST00000505565.5_3, ENST00000506750.5_1, ENST00000508716.1_3, ENST00000518955.1_1	MTREX	lncRNA, nonsense_mediated_decay, protein_coding, retained_intron	SKIV2L2	9.56	8.8	8.13	25.73	28.68	24.91	30.21	35.84	21.56	450.501	-1.47831	-9.22058	2.95495e-20	1.86387e-17	450.501	-0.0972202	-0.638072	0.523427	0.999983
ENSG00000039139.9_3	4	4	[ENST00000265104.4_1, ENST00000504001.3_1, ENST00000508040.1_1, ENST00000512443.1_1]	chr5:13690439-13944652	-	-	81	254213	16475	485	15990	0.970561	ENST00000265104.4_1, ENST00000504001.3_1, ENST00000508040.1_1, ENST00000512443.1_1	DNAH5	lncRNA, protein_coding, retained_intron	DNAH5	0.01	0.12	0.12	0.15	0.25	0.09	0.26	0.1	0.18	13.738	-0.975548	-1.28328	0.199394	0.375685	13.738	-0.162353	-0.217592	0.827747	0.999983
ENSG00000039319.17_4	13	13	[ENST00000338008.9_1, ENST00000505560.5_2, ENST00000507548.1_2, ENST00000509558.1_3, ENST00000509562.2_3, ENST00000510158.5_1, ENST00000510995.1_1, ENST00000511050.5_1, ENST00000511829.5_1, ENST00000512442.1_1, ENST00000512558.5_1, ENST00000512907.5_1, ENST00000513789.1_2]	chr5:79703831-79779198	+	-	23	75367	15490	5801	9689	0.6255	ENST00000338008.9_1, ENST00000505560.5_2, ENST00000507548.1_2, ENST00000509558.1_4, ENST00000509562.2_4, ENST00000510158.5_1, ENST00000510995.1_1, ENST00000511050.5_1, ENST00000511829.5_1, ENST00000512442.1_1, ENST00000512558.5_1, ENST00000512907.5_1, ENST00000513789.1_2	ZFYVE16	lncRNA, nonsense_mediated_decay, protein_coding, retained_intron	ZFYVE16	2.94	4.31	4.65	6.71	6.59	4.51	9.34	7.63	4.86	288.497	-0.639039	-2.67331	0.00751071	0.0383232	288.497	-0.244287	-1.0336	0.301323	0.999983
ENSG00000039523.20_7	23	23	[ENST00000042381.9_4, ENST00000379312.7_3, ENST00000422602.8_1, ENST00000428437.6_3, ENST00000540839.7_3, ENST00000561534.5_1, ENST00000562116.1_3, ENST00000562755.5_3, ENST00000564616.1_1, ENST00000565176.5_3, ENST00000565190.1_1, ENST00000565679.1_1, ENST00000566522.5_1, ENST00000566559.5_3, ENST00000566730.1_1, ENST00000566815.5_3, ENST00000566907.1_3, ENST00000566920.5_3, ENST00000568959.1_3,…	chr16:67552320-67580691	+	-	24	28371	6729	127	6602	0.981127	ENST00000042381.9_4, ENST00000379312.7_3, ENST00000422602.8_1, ENST00000428437.6_3, ENST00000540839.7_3, ENST00000561534.5_1, ENST00000562116.1_3, ENST00000562755.5_3, ENST00000564616.1_1, ENST00000565176.5_3, ENST00000565190.1_1, ENST00000565679.1_1, ENST00000566522.5_1, ENST00000566559.5_3, ENST00000566730.1_1, ENST00000566815.5_3, ENST00000566907.1_3, ENST00000566920.5_3, ENST00000568959.1_3, …	RIPOR1	lncRNA, nonsense_mediated_decay, protein_coding, retained_intron	FAM65A	28.54	27.31	26.68	23.37	20.81	23.13	19.3	17.08	25.16	978.537	0.634117	3.29169	0.000995866	0.00863301	978.537	0.140864	0.729763	0.465535	0.999983
ENSG00000039537.13_3	8	8	[ENST00000263413.7_1, ENST00000337836.9_1, ENST00000417809.1_3, ENST00000433294.1_1, ENST00000461473.1_1, ENST00000473450.1_1, ENST00000475349.5_1, ENST00000511470.1_1]	chr5:41142335-41261540	-	-	24	119205	4739	168	4571	0.964549	ENST00000263413.7_1, ENST00000337836.9_1, ENST00000417809.1_3, ENST00000433294.1_1, ENST00000461473.1_1, ENST00000473450.1_1, ENST00000475349.5_1, ENST00000511470.1_1	C6	lncRNA, protein_coding, retained_intron	C6	0	0	0	0	0	0	0	0	0
ENSG00000039560.14_4	28	28	[ENST00000265109.8_3, ENST00000428746.6_2, ENST00000502736.5_1, ENST00000503222.5_1, ENST00000503673.5_2, ENST00000504052.5_1, ENST00000505185.5_1, ENST00000506376.1_1, ENST00000507276.5_1, ENST00000507502.5_1, ENST00000507883.1_1, ENST00000508315.5_1, ENST00000508777.5_1, ENST00000509247.1_1, ENST00000510319.5_1, ENST00000510386.1_1, ENST00000511652.5_1, ENST00000512305.5_1, ENST00000512625.5_1,…	chr5:34656432-34832717	+	-	31	176285	7581	366	7215	0.951721	ENST00000265109.8_3, ENST00000428746.6_2, ENST00000502736.5_1, ENST00000503222.5_1, ENST00000503673.5_2, ENST00000504052.5_1, ENST00000505185.5_1, ENST00000506376.1_1, ENST00000507276.5_1, ENST00000507502.5_1, ENST00000507883.1_1, ENST00000508315.5_1, ENST00000508777.5_1, ENST00000509247.1_1, ENST00000510319.5_1, ENST00000510386.1_1, ENST00000511652.5_1, ENST00000512305.5_1, ENST00000512625.5_1, …	RAI14	lncRNA, nonsense_mediated_decay, protein_coding, retained_intron	RAI14	4.95	4.55	6.67	4.29	6.79	5.98	7.56	6.13	4.88	218.596	0.0351343	0.161297	0.871859	0.930101	218.596	-0.0929454	-0.431239	0.666295	0.999983
ENSG00000039600.11_3	3	3	[ENST00000265007.11_2, ENST00000311371.9_1, ENST00000519442.1_1]	chr5:157052686-157098488	-	-	7	45802	3489	0	3489	1	ENST00000265007.11_2, ENST00000311371.9_1, ENST00000519442.1_1	SOX30	protein_coding	SOX30	0	0.05	0.05	0	0	0	0.16	0.14	0	1.08414	-1.42475	-0.619331	0.535698	NA	1.08414	-4.06721	-1.69893	0.0893333	NA
ENSG00000039650.12_5	31	29	[ENST00000322344.8_2, ENST00000593706.3_1, ENST00000593946.5_1, ENST00000594661.5_1, ENST00000595081.5_1, ENST00000595792.1_1, ENST00000596014.5_1, ENST00000596624.1_2, ENST00000596726.3_1, ENST00000597965.2_1, ENST00000598020.3_1, ENST00000599454.5_1, ENST00000599543.3_1, ENST00000600573.5_1, ENST00000600910.5_1, ENST00000601816.3_1, ENST00000625216.2_1, ENST00000625299.1_1, ENST00000626274.2_1,…	chr19:50363138-50381608	-	-	17	18470	4545	288	4257	0.936634	ENST00000322344.8_2, ENST00000391830.1_1, ENST00000391834.6_2, ENST00000482622.1_1, ENST00000593706.3_1, ENST00000593946.5_1, ENST00000594661.5_1, ENST00000595081.5_1, ENST00000595792.1_1, ENST00000596014.5_1, ENST00000596624.1_2, ENST00000596726.3_1, ENST00000597965.2_1, ENST00000598020.3_1, ENST00000599454.5_1, ENST00000599543.3_1, ENST00000600573.5_1, ENST00000600910.5_1, ENST00000601816.3_1, …	AKT1S1, PNKP	lncRNA, non_stop_decay, nonsense_mediated_decay, protein_coding, retained_intron	PNKP, AKT1S1	8.92	13.61	14	48.82	12.7	14.65	12.26	15.7	15.56	164.644	-0.0383424	-0.0674006	0.946263	0.969689	164.644	0.848501	1.49093	0.13598	0.893136
ENSG00000039987.6_4	4	4	[ENST00000042931.1_1, ENST00000549706.5_3, ENST00000552539.1_1, ENST00000553030.5_1]	chr19:12862515-12869272	+	-	10	6757	2646	270	2376	0.897959	ENST00000042931.1_1, ENST00000549706.5_3, ENST00000552539.1_1, ENST00000553030.5_1	BEST2	protein_coding	BEST2	0	0.04	0	0.04	0	0.04	0	0.04	0	0.393459	0.0323974	0.00978883	0.99219	NA	0.393459	0.698613	0.214522	0.83014	NA
ENSG00000040199.18_5	7	7	[ENST00000393524.6_3, ENST00000538126.5_1, ENST00000564884.5_2, ENST00000567016.1_1, ENST00000568004.5_2, ENST00000568954.5_3, ENST00000574977.1_1]	chr16:71671737-71758604	-	-	22	86867	12493	2122	10371	0.830145	ENST00000393524.6_3, ENST00000538126.5_1, ENST00000564884.5_2, ENST00000567016.1_1, ENST00000568004.5_2, ENST00000568954.5_3, ENST00000574977.1_1	PHLPP2	nonsense_mediated_decay, protein_coding, retained_intron	PHLPP2	3.93	4.94	7.01	6.92	8.61	5.2	7.52	8.1	5.91	323.401	-0.216007	-0.997453	0.318545	0.510458	323.401	-0.0214497	-0.0998817	0.920438	0.999983
ENSG00000040275.17_6	16	13	[ENST00000265295.9_2, ENST00000503209.1_1, ENST00000503871.1_3, ENST00000505977.1_2, ENST00000506574.5_3, ENST00000507232.5_1, ENST00000508247.5_4, ENST00000508837.1_1, ENST00000509785.5_1, ENST00000510751.5_1, ENST00000512028.5_1, ENST00000513795.1_3, ENST00000513941.5_6, ENST00000515224.5_3, ENST00000523518.1_1, ENST00000629457.2_1]	chr5:169010639-169031782	+	-	18	21143	4775	560	4215	0.882722	ENST00000265295.9_2, ENST00000503209.1_1, ENST00000503871.1_3, ENST00000505977.1_2, ENST00000506574.5_3, ENST00000507232.5_1, ENST00000508247.5_4, ENST00000508837.1_1, ENST00000509785.5_1, ENST00000510751.5_1, ENST00000512028.5_1, ENST00000513795.1_3, ENST00000513941.5_7, ENST00000515224.5_3, ENST00000523518.1_1, ENST00000629457.2_1	SPDL1	lncRNA, nonsense_mediated_decay, protein_coding, retained_intron	SPDL1	8.64	11.51	11.1	14.59	15.44	15.47	16.16	16.97	14.14	292.878	-0.367805	-2.55021	0.0107657	0.0496481	292.878	-0.0210033	-0.151041	0.879944	0.999983
ENSG00000040341.18_5	29	19	[ENST00000355780.9_1, ENST00000517542.5_1, ENST00000518502.5_1, ENST00000518767.5_1, ENST00000518981.5_1, ENST00000519818.5_1, ENST00000519961.5_1, ENST00000520872.5_1, ENST00000520945.5_1, ENST00000521210.5_1, ENST00000521293.5_1, ENST00000521419.5_1, ENST00000521447.5_1, ENST00000521451.5_1, ENST00000521727.5_1, ENST00000521736.5_1, ENST00000521845.5_1, ENST00000522061.5_1, ENST00000522509.5_1,…	chr8:74332603-74659943	-	-	25	327340	8964	1646	7318	0.816377	ENST00000355780.9_1, ENST00000358757.5_1, ENST00000517542.5_1, ENST00000518502.5_1, ENST00000518767.5_2, ENST00000518981.5_1, ENST00000519818.5_1, ENST00000519961.5_1, ENST00000520872.5_1, ENST00000520945.5_1, ENST00000521210.5_1, ENST00000521293.5_1, ENST00000521419.5_1, ENST00000521447.5_2, ENST00000521451.5_1, ENST00000521727.5_1, ENST00000521736.5_1, ENST00000521845.5_1, ENST00000522061.5_1, …	AC022826.2, STAU2	lncRNA, nonsense_mediated_decay, protein_coding, retained_intron	STAU2, RP11-463D19.2	7.93	6.04	8.25	10.41	13.8	11.45	14.48	18.78	15.72	209.303	-0.90274	-4.73694	2.16971e-06	6.30261e-05	209.303	-0.426513	-2.33562	0.0195113	0.483867
ENSG00000040487.13_4	6	5	[ENST00000375153.8_2, ENST00000375155.7_1, ENST00000400548.6_1, ENST00000432465.1_3, ENST00000469076.5_1, ENST00000497827.1_1]	chr1:19638819-19655794	+	-	9	16975	2686	788	1898	0.706627	ENST00000375153.8_2, ENST00000375155.7_1, ENST00000400548.6_1, ENST00000432465.1_3, ENST00000469076.5_1, ENST00000497827.1_1	PQLC2	nonsense_mediated_decay, protein_coding	PQLC2	5.02	5.03	5.24	3.77	2.93	3.23	2.35	3.41	4.31	80.5012	0.828511	2.89902	0.00374334	0.0232572	80.5012	0.00812831	0.0278638	0.977771	0.999983
ENSG00000040531.14_4	10	10	[ENST00000046640.7_2, ENST00000381870.7_2, ENST00000399306.6_1, ENST00000452111.5_1, ENST00000467663.5_1, ENST00000488623.5_1, ENST00000495445.5_1, ENST00000574218.1_3, ENST00000574776.5_1, ENST00000576979.1_1]	chr17:3539761-3564836	+	-	13	25075	3398	171	3227	0.949676	ENST00000046640.7_2, ENST00000381870.7_2, ENST00000399306.6_1, ENST00000452111.5_1, ENST00000467663.5_1, ENST00000488623.5_1, ENST00000495445.5_1, ENST00000574218.1_3, ENST00000574776.5_1, ENST00000576979.1_1	CTNS	lncRNA, nonsense_mediated_decay, protein_coding, retained_intron	CTNS	14.8	20.79	11.1	14.9	11.93	13.88	13.54	19.02	12.23	260.217	0.29593	1.30602	0.191547	0.365216	260.217	-0.0838414	-0.369204	0.711976	0.999983
ENSG00000040608.14_5	6	6	[ENST00000043402.8_3, ENST00000416372.5_4, ENST00000425986.1_2, ENST00000463936.1_1, ENST00000469601.1_1, ENST00000474642.1_1]	chr22:20228937-20270769	-	-	8	41832	3126	93	3033	0.97025	ENST00000043402.8_3, ENST00000416372.5_4, ENST00000425986.1_2, ENST00000463936.1_1, ENST00000469601.1_1, ENST00000474642.1_1	RTN4R	lncRNA, protein_coding	RTN4R	8.86	6.9	6.98	4.44	3.44	3.68	4.37	3.69	5.57	121.528	0.964905	3.57961	0.000344102	0.00378884	121.528	-0.21317	-0.76967	0.441496	0.999983
ENSG00000040633.13_4	13	12	[ENST00000320316.8_2, ENST00000454255.6_1, ENST00000570753.5_1, ENST00000570899.1_1, ENST00000571362.5_1, ENST00000572789.5_1, ENST00000573826.5_1, ENST00000574236.5_1, ENST00000574323.5_1, ENST00000574407.5_1, ENST00000574899.1_1, ENST00000576955.5_1, ENST00000613632.4_1]	chr17:7138347-7143041	-	-	11	4694	2733	0	2733	1	ENST00000320316.8_2, ENST00000454255.6_1, ENST00000570753.5_1, ENST00000570899.1_1, ENST00000571362.5_1, ENST00000572789.5_1, ENST00000573826.5_1, ENST00000574236.5_1, ENST00000574323.5_1, ENST00000574407.5_1, ENST00000574899.1_1, ENST00000576955.5_1, ENST00000613632.4_1	PHF23	lncRNA, protein_coding	PHF23	17.56	19.72	14.54	21.43	17.89	21.19	22.85	20.65	27.2	327.963	-0.230987	-1.11918	0.263062	0.450953	327.963	-0.202356	-0.982266	0.325969	0.999983
ENSG00000040731.10_4	4	4	[ENST00000264463.8_2, ENST00000502921.5_1, ENST00000503958.1_1, ENST00000510477.5_1]	chr5:24487208-24645087	-	-	13	157879	3660	112	3548	0.969399	ENST00000264463.8_2, ENST00000502921.5_1, ENST00000503958.1_1, ENST00000510477.5_1	CDH10	lncRNA, nonsense_mediated_decay, protein_coding, retained_intron	CDH10	0	0	0	0	0	0	0.06	0	0	0.180771	-1.53013	-0.378176	0.7053	NA	0.180771	-1.72455	-0.426235	0.669937	NA
ENSG00000040933.15_3	10	8	[ENST00000074304.9_1, ENST00000409016.8_2, ENST00000409463.5_1, ENST00000409540.7_2, ENST00000409851.7_1, ENST00000463367.1_1, ENST00000467042.1_1, ENST00000468638.1_1, ENST00000498026.1_1, ENST00000523221.1_1]	chr2:99061316-99210853	+	-	32	149537	13187	1282	11905	0.902783	ENST00000074304.9_1, ENST00000409016.8_2, ENST00000409463.5_1, ENST00000409540.7_2, ENST00000409851.7_1, ENST00000463367.1_1, ENST00000467042.1_1, ENST00000468638.1_1, ENST00000498026.1_1, ENST00000523221.1_1	INPP4A	lncRNA, protein_coding, retained_intron	INPP4A	3.53	5.4	3.09	3.43	4.35	3.72	4.35	5.32	4.3	197.721	-0.00224942	-0.0109515	0.991262	0.994792	197.721	-0.248136	-1.21938	0.222699	0.975961
ENSG00000041353.10_4	4	4	[ENST00000262094.10_2, ENST00000586570.5_2, ENST00000586594.1_1, ENST00000592334.1_2]	chr18:52385090-52562747	+	-	8	177657	7154	142	7012	0.980151	ENST00000262094.10_2, ENST00000586570.5_3, ENST00000586594.1_1, ENST00000592334.1_3	RAB27B	lncRNA, protein_coding	RAB27B	9.03	11	11.5	8.75	13.87	11.55	12.94	10.76	10.11	426.224	0.125201	0.731538	0.464451	0.64447	426.224	0.0353416	0.207669	0.835487	0.999983
ENSG00000041357.16_4	21	17	[ENST00000044462.12_2, ENST00000413382.6_1, ENST00000557929.5_1, ENST00000558094.1_1, ENST00000558281.5_2, ENST00000558341.5_1, ENST00000558635.1_1, ENST00000558639.5_1, ENST00000559082.5_1, ENST00000559146.5_1, ENST00000559154.5_3, ENST00000559365.5_3, ENST00000559437.5_3, ENST00000559906.1_1, ENST00000559934.5_1, ENST00000559948.5_3, ENST00000560033.5_1, ENST00000560099.5_1, ENST00000560217.5_2…	chr15:78832746-78844759	+	-	6	12013	6994	2368	4626	0.661424	ENST00000044462.12_2, ENST00000413382.6_1, ENST00000557929.5_1, ENST00000558094.1_1, ENST00000558281.5_2, ENST00000558341.5_1, ENST00000558635.1_1, ENST00000558639.5_1, ENST00000559082.5_1, ENST00000559146.5_1, ENST00000559154.5_3, ENST00000559365.5_3, ENST00000559437.5_3, ENST00000559906.1_1, ENST00000559934.5_1, ENST00000559948.5_3, ENST00000560033.5_1, ENST00000560099.5_1, ENST00000560217.5_2,…	PSMA4	lncRNA, protein_coding, retained_intron	PSMA4	10.72	16.36	14.15	17.91	26.66	20.66	19.02	28.16	18.27	218.978	-0.432987	-2.19203	0.0283776	0.100157	218.978	0.0326291	0.167557	0.866932	0.999983
ENSG00000041515.16_3	6	6	[ENST00000251041.10_2, ENST00000356711.7_2, ENST00000375857.6_1, ENST00000457511.7_2, ENST00000467639.1_1, ENST00000482793.1_1]	chr13:109248499-109860353	+	-	39	611854	8816	460	8356	0.947822	ENST00000251041.10_2, ENST00000356711.7_2, ENST00000375857.6_1, ENST00000457511.7_2, ENST00000467639.1_1, ENST00000482793.1_1	MYO16	lncRNA, protein_coding, retained_intron	MYO16	0.03	0.01	0.02	0	0	0	0.02	0.05	0.04	1.29082	-0.569576	-0.350827	0.725718	NA	1.29082	-3.24939	-1.69502	0.0900714	NA
ENSG00000041802.11_4	8	8	[ENST00000265245.10_3, ENST00000427461.1_1, ENST00000437613.1_2, ENST00000460584.1_1, ENST00000461343.1_1, ENST00000466391.1_1, ENST00000475763.5_1, ENST00000480853.1_1]	chr3:194361519-194393192	-	-	16	31673	4801	925	3876	0.807332	ENST00000265245.10_3, ENST00000427461.1_1, ENST00000437613.1_2, ENST00000460584.1_1, ENST00000461343.1_1, ENST00000466391.1_1, ENST00000475763.5_1, ENST00000480853.1_1	LSG1	lncRNA, nonsense_mediated_decay, protein_coding, retained_intron	LSG1	11.84	14.07	11.51	12.79	17.15	14.27	14.47	18.75	10.57	502.312	0.019741	0.12395	0.901355	0.946457	502.312	0.057609	0.363249	0.716419	0.999983
ENSG00000041880.14_4	9	8	[ENST00000398755.7_1, ENST00000417220.6_1, ENST00000431474.5_1, ENST00000470601.5_1, ENST00000470749.1_1, ENST00000471971.5_1, ENST00000475782.1_1, ENST00000486510.1_1, ENST00000498510.1_3]	chr3:51976360-51982883	+	-	10	6523	2928	298	2630	0.898224	ENST00000398755.7_1, ENST00000417220.6_1, ENST00000431474.5_1, ENST00000470601.5_1, ENST00000470749.1_1, ENST00000471971.5_1, ENST00000475782.1_1, ENST00000486510.1_1, ENST00000498510.1_3	PARP3	lncRNA, nonsense_mediated_decay, protein_coding, retained_intron	PARP3	3.07	2.16	1.68	2.12	2.05	2.12	1.55	1.33	1.64	57.5265	0.858359	2.60614	0.00915699	0.044329	57.5265	0.508186	1.53306	0.12526	0.876514
ENSG00000041982.16_4	14	14	[ENST00000341037.8_2, ENST00000350763.9_3, ENST00000423613.6_1, ENST00000460345.1_1, ENST00000473855.1_1, ENST00000476680.1_1, ENST00000481475.1_1, ENST00000498724.5_1, ENST00000534839.1_1, ENST00000535648.5_1, ENST00000537320.5_1, ENST00000542877.5_1, ENST00000544972.1_1, ENST00000635336.1_1]	chr9:117781853-117880536	-	-	33	98683	9639	694	8945	0.928001	ENST00000341037.8_2, ENST00000350763.9_3, ENST00000423613.6_1, ENST00000460345.1_1, ENST00000473855.1_1, ENST00000476680.1_1, ENST00000481475.1_1, ENST00000498724.5_1, ENST00000534839.1_1, ENST00000535648.5_1, ENST00000537320.5_1, ENST00000542877.5_1, ENST00000544972.1_1, ENST00000635336.1_1	TNC	lncRNA, protein_coding	TNC	0	0	0	0	0	0	0	0	0
ENSG00000041988.15_5	8	8	[ENST00000054650.8_1, ENST00000307896.10_1, ENST00000377627.7_1, ENST00000472925.1_5, ENST00000480647.1_1, ENST00000484669.6_1, ENST00000484676.1_1, ENST00000487819.5_2]	chr1:6684925-6695646	+	-	7	10721	4072	360	3712	0.911591	ENST00000054650.8_1, ENST00000307896.10_1, ENST00000377627.7_1, ENST00000472925.1_5, ENST00000480647.1_1, ENST00000484669.6_1, ENST00000484676.1_1, ENST00000487819.5_2	THAP3	lncRNA, nonsense_mediated_decay, protein_coding, retained_intron	THAP3	3.35	6.08	6.62	3.13	3.94	5.9	2.52	5.28	3.29	45.2857	0.750457	1.9756	0.0482006	0.145403	45.2857	0.265646	0.696205	0.486301	0.999983
ENSG00000042062.12_6	6	5	[ENST00000045083.6_2, ENST00000327979.7_2, ENST00000462493.1_1, ENST00000462842.1_1, ENST00000482129.1_1, ENST00000488529.5_1]	chr20:49202644-49308064	-	-	23	105420	6008	481	5527	0.91994	ENST00000045083.6_2, ENST00000327979.7_2, ENST00000462493.1_1, ENST00000462842.1_1, ENST00000482129.1_1, ENST00000488529.5_1	RIPOR3	lncRNA, protein_coding, retained_intron	FAM65C	1.16	1.84	0.9	1.21	1.25	0.59	0.59	0.7	0.89	31.7809	1.07955	2.42381	0.0153588	0.0645438	31.7809	0.533453	1.18342	0.236644	0.988917
ENSG00000042088.13_4	17	17	[ENST00000335725.8_2, ENST00000393452.7_2, ENST00000393454.6_2, ENST00000545686.6_1, ENST00000553527.1_2, ENST00000553569.1_1, ENST00000553617.5_1, ENST00000553989.1_1, ENST00000554180.5_1, ENST00000554976.5_1, ENST00000555178.5_1, ENST00000555565.5_1, ENST00000555880.5_3, ENST00000556063.1_1, ENST00000556498.1_2, ENST00000556867.1_1, ENST00000557782.1_1]	chr14:90421282-90511112	+	-	25	89830	6227	1697	4530	0.727477	ENST00000335725.8_2, ENST00000393452.7_2, ENST00000393454.6_2, ENST00000545686.6_1, ENST00000553527.1_3, ENST00000553569.1_1, ENST00000553617.5_1, ENST00000553989.1_2, ENST00000554180.5_1, ENST00000554976.5_1, ENST00000555178.5_1, ENST00000555565.5_1, ENST00000555880.5_3, ENST00000556063.1_1, ENST00000556498.1_3, ENST00000556867.1_2, ENST00000557782.1_2	TDP1	lncRNA, nonsense_mediated_decay, protein_coding, retained_intron	TDP1	7.08	9.04	9.44	11.69	12.51	12.53	13.15	15.31	9.49	284.838	-0.332601	-2.08157	0.0373821	0.122172	284.838	-0.00411363	-0.0262073	0.979092	0.999983
ENSG00000042286.15_3	4	4	[ENST00000307864.3_2, ENST00000373248.5_1, ENST00000482166.1_1, ENST00000613322.4_1]	chr10:71857978-71892690	-	-	11	34712	5135	954	4181	0.814216	ENST00000307864.3_2, ENST00000373248.5_1, ENST00000482166.1_1, ENST00000613322.4_1	AIFM2	lncRNA, protein_coding	AIFM2	2.29	1.7	1.68	1.29	2.44	1.98	1.88	1.66	1.45	62.0459	0.432803	1.4113	0.158157	0.321263	62.0459	0.217661	0.710136	0.47762	0.999983
[truncated: 59,981 more rows]

## Sheet: EPB41L4A-AS1 - both LNAs
ID	Isoforms	Promoters	TCONS	Position	Strand	Manual	NonredundantExons	TotalLength	ExonicLength	ExonicRepetitive	ExonicUnique	FractionUnique	GencodeIDs	GencodeSymbols	GencodeTypes	Genes	/home/projects/ulitsky/alanm/MCF7-gapmer/AS1_L24L23L2L1_revisions/expression/RSEM_MCF7_L1_rep1_S73_expression.genes.results	/home/projects/ulitsky/alanm/MCF7-gapmer/AS1_L24L23L2L1_revisions/expression/RSEM_MCF7_L1_rep2_S74_expression.genes.results	/home/projects/ulitsky/alanm/MCF7-gapmer/AS1_L24L23L2L1_revisions/expression/RSEM_MCF7_L1_rep3_S75_expression.genes.results	/home/projects/ulitsky/alanm/MCF7-gapmer/AS1_L24L23L2L1_revisions/expression/RSEM_MCF7_L23_rep1_S67_expression.genes.results	/home/projects/ulitsky/alanm/MCF7-gapmer/AS1_L24L23L2L1_revisions/expression/RSEM_MCF7_L23_rep2_S68_expression.genes.results	/home/projects/ulitsky/alanm/MCF7-gapmer/AS1_L24L23L2L1_revisions/expression/RSEM_MCF7_L23_rep3_S69_expression.genes.results	/home/projects/ulitsky/alanm/MCF7-gapmer/AS1_L24L23L2L1_revisions/expression/RSEM_MCF7_L24_rep1_S70_expression.genes.results	/home/projects/ulitsky/alanm/MCF7-gapmer/AS1_L24L23L2L1_revisions/expression/RSEM_MCF7_L24_rep2_S71_expression.genes.results	/home/projects/ulitsky/alanm/MCF7-gapmer/AS1_L24L23L2L1_revisions/expression/RSEM_MCF7_L24_rep3_S72_expression.genes.results	/home/projects/ulitsky/alanm/MCF7-gapmer/AS1_L24L23L2L1_revisions/expression/RSEM_MCF7_L2_rep1_S76_expression.genes.results	/home/projects/ulitsky/alanm/MCF7-gapmer/AS1_L24L23L2L1_revisions/expression/RSEM_MCF7_L2_rep2_S77_expression.genes.results	/home/projects/ulitsky/alanm/MCF7-gapmer/AS1_L24L23L2L1_revisions/expression/RSEM_MCF7_L2_rep3_S78_expression.genes.results	L24vsL1.baseMean	L24vsL1.log2FoldChange	L24vsL1.stat	L24vsL1.pvalue	L24vsL1.padj	L23vsL1.baseMean	L23vsL1.log2FoldChange	L23vsL1.stat	L23vsL1.pvalue	L23vsL1.padj	L24vsL2.baseMean	L24vsL2.log2FoldChange	L24vsL2.stat	L24vsL2.pvalue	L24vsL2.padj	L23vsL2.baseMean	L23vsL2.log2FoldChange	L23vsL2.stat	L23vsL2.pvalue	L23vsL2.padj	L1vsL2.baseMean
[truncated: 60,565 more rows]
[truncated: 4 more columns]

[truncated: 7 more sheets: EPB41L4A-AS1 KD - ribodepleted, EPB41L4A-AS1 KD - custom anno , siSUB1 - ribodepleted, siSUB1 - custom anno, GAS5 KD - ribodepleted, GAS5 KD - custom anno, SUB1 RIP - polyA]
