# Supplementary material for: EPB41L4A-AS1 long noncoding RNA acts in both cis- and trans-acting transcriptional regulation and controls nucleolar biology
Source: bioRxiv preprint, doi:10.1101/2025.04.08.647803, version 3 (2025-11-16)
Supplement: Table S3 [file 647803_file05.xlsx]

## Sheet: CTCF CUT&RUN peaks
chr1	10012	10247	ALL_peaks_peak_1	182	.	8.27638	21.4708	18.2012	45
chr1	11193	11463	ALL_peaks_peak_2	270	.	9.5598	30.8802	27.0472	144
chr1	11589	11675	ALL_peaks_peak_3	46	.	3.88769	7.21359	4.67858	49
chr1	15569	15674	ALL_peaks_peak_4	144	.	6.28437	17.5581	14.4798	60
chr1	16207	16283	ALL_peaks_peak_5	73	.	4.54043	10.0884	7.37987	35
chr1	33976	34042	ALL_peaks_peak_6	28	.	3.73261	5.188	2.80148	17
chr1	91243	91469	ALL_peaks_peak_7	161	.	9.08812	19.3145	16.1467	146
chr1	104950	105233	ALL_peaks_peak_8	189	.	8.39542	22.2362	18.9248	52
chr1	137427	137511	ALL_peaks_peak_9	25	.	3.43367	4.90848	2.559	37
chr1	138934	139036	ALL_peaks_peak_10	69	.	5.11189	9.61102	6.9233	45
chr1	139129	139262	ALL_peaks_peak_11	86	.	5.67988	11.3937	8.6183	75
chr1	140262	140362	ALL_peaks_peak_12	82	.	5.67232	11.0027	8.24422	50
chr1	237665	237855	ALL_peaks_peak_13	125	.	6.15276	15.5607	12.5794	61
chr1	251271	251528	ALL_peaks_peak_14	231	.	9.81107	26.7649	23.1976	51
chr1	267423	267490	ALL_peaks_peak_15	68	.	5.68008	9.55656	6.87133	10
chr1	320377	320484	ALL_peaks_peak_16	58	.	5.02243	8.45053	5.83976	44
chr1	324871	324995	ALL_peaks_peak_17	77	.	5.38579	10.4725	7.74638	69
chr1	369356	369816	ALL_peaks_peak_18	305	.	12.5855	34.6408	30.5233	197
chr1	383431	383660	ALL_peaks_peak_19	242	.	11.7388	27.938	24.2983	159
chr1	388993	389092	ALL_peaks_peak_20	128	.	7.95211	15.8712	12.8691	53
chr1	412093	412256	ALL_peaks_peak_21	75	.	5.6546	10.2304	7.51522	134
chr1	416570	416901	ALL_peaks_peak_22	201	.	9.92947	23.5323	20.1523	100
chr1	423113	423439	ALL_peaks_peak_23	219	.	10.9815	25.3981	21.9106	65
chr1	437915	438052	ALL_peaks_peak_24	54	.	4.59559	8.0148	5.42574	92
chr1	442263	442641	ALL_peaks_peak_25	142	.	7.4537	17.3514	14.2812	161
chr1	456052	456130	ALL_peaks_peak_26	83	.	5.50449	11.0617	8.30061	39
chr1	461881	462057	ALL_peaks_peak_27	157	.	6.86253	18.9173	15.7745	85
chr1	521456	521666	ALL_peaks_peak_28	255	.	12.1175	29.2288	25.5058	105
chr1	522488	522635	ALL_peaks_peak_29	47	.	4.72899	7.34021	4.79832	57
chr1	522761	522857	ALL_peaks_peak_30	35	.	4.07194	5.98397	3.53158	38
chr1	527650	527748	ALL_peaks_peak_31	136	.	8.15963	16.7058	13.6699	43
chr1	540445	540701	ALL_peaks_peak_32	154	.	7.58232	18.5657	15.4379	52
chr1	541165	541307	ALL_peaks_peak_33	25	.	3.29097	4.86661	2.52021	109
chr1	544690	544774	ALL_peaks_peak_34	43	.	3.997	6.90056	4.38191	42
chr1	545094	545205	ALL_peaks_peak_35	19	.	3.05826	4.25051	1.95847	104
chr1	545706	545871	ALL_peaks_peak_36	26	.	3.49304	5.01063	2.65351	136
chr1	547665	547770	ALL_peaks_peak_37	37	.	4.04858	6.20117	3.73622	65
chr1	564488	565359	ALL_peaks_peak_38	227	.	3.66984	26.3261	22.7904	302
chr1	565618	565839	ALL_peaks_peak_39	145	.	2.97748	17.6522	14.5702	165
chr1	566070	566743	ALL_peaks_peak_40	232	.	3.59014	26.8415	23.2701	110
chr1	567266	567737	ALL_peaks_peak_41	305	.	4.08473	34.6836	30.5636	302
chr1	567897	568177	ALL_peaks_peak_42	189	.	3.31929	22.2872	18.9738	107
chr1	568784	568912	ALL_peaks_peak_43	222	.	3.52898	25.7928	22.285	62
chr1	569297	569766	ALL_peaks_peak_44	241	.	3.63819	27.7825	24.1594	60
chr1	569895	570054	ALL_peaks_peak_45	215	.	3.59966	24.9744	21.5162	37
chr1	570203	570279	ALL_peaks_peak_46	179	.	3.4603	21.2063	17.949	37
chr1	573762	573839	ALL_peaks_peak_47	62	.	3.33944	8.91991	6.27561	33
chr1	601369	601478	ALL_peaks_peak_48	109	.	7.05517	13.8717	10.9667	45
chr1	606009	606178	ALL_peaks_peak_49	243	.	11.4212	27.9957	24.3526	87
chr1	619920	620243	ALL_peaks_peak_50	301	.	12.7235	34.2304	30.1495	219
chr1	647478	647576	ALL_peaks_peak_51	42	.	4.54406	6.75426	4.24317	35
chr1	660871	660961	ALL_peaks_peak_52	71	.	5.21951	9.80978	7.11337	56
chr1	664420	664739	ALL_peaks_peak_53	152	.	7.47544	18.3517	15.2326	89
chr1	665811	665897	ALL_peaks_peak_54	26	.	3.3698	5.00961	2.65264	27
chr1	672551	672642	ALL_peaks_peak_55	66	.	4.94506	9.29959	6.63714	53
chr1	713975	714371	ALL_peaks_peak_56	190	.	9.60878	22.3914	19.0729	249
chr1	726295	726367	ALL_peaks_peak_57	97	.	6.81609	12.6089	9.76383	37
chr1	726932	727015	ALL_peaks_peak_58	107	.	7.19476	13.6746	10.7774	32
chr1	740214	740329	ALL_peaks_peak_59	161	.	9.08812	19.3145	16.1467	60
chr1	785885	786006	ALL_peaks_peak_60	150	.	8.70945	18.1481	15.037	60
chr1	793392	793711	ALL_peaks_peak_61	242	.	11.7388	27.938	24.2983	82
chr1	804893	805343	ALL_peaks_peak_62	93	.	6.56359	12.1808	9.36298	388
chr1	815389	815557	ALL_peaks_peak_63	122	.	7.047	15.1915	12.2253	86
chr1	816539	816605	ALL_peaks_peak_64	39	.	4.03644	6.44152	3.96271	40
chr1	823442	823577	ALL_peaks_peak_65	80	.	5.03894	10.8479	8.09579	91
chr1	824716	824783	ALL_peaks_peak_66	68	.	4.7533	9.5842	6.89768	24
chr1	825001	825220	ALL_peaks_peak_67	92	.	5.45774	12.0837	9.27003	41
chr1	825860	825933	ALL_peaks_peak_68	69	.	4.79088	9.66048	6.97065	18
chr1	840070	840187	ALL_peaks_peak_69	68	.	5.68008	9.55656	6.87133	65
chr1	848363	848431	ALL_peaks_peak_70	59	.	5.3014	8.59228	5.96277	17
chr1	873580	873745	ALL_peaks_peak_71	184	.	9.84547	21.6995	18.4122	107
chr1	873850	874039	ALL_peaks_peak_72	50	.	4.92273	7.65747	5.08577	136
chr1	886918	886987	ALL_peaks_peak_73	50	.	4.92273	7.65747	5.08577	21
chr1	911555	911992	ALL_peaks_peak_74	230	.	11.3602	26.6609	23.099	67
chr1	937350	937758	ALL_peaks_peak_75	87	.	6.43742	11.5664	8.7735	63
chr1	976142	976287	ALL_peaks_peak_76	59	.	5.3014	8.59228	5.96277	45
chr1	999305	999651	ALL_peaks_peak_77	164	.	8.96507	19.6237	16.4433	49
chr1	1046544	1046636	ALL_peaks_peak_78	78	.	6.05875	10.5485	7.80868	30
chr1	1051563	1051708	ALL_peaks_peak_79	68	.	5.68008	9.55656	6.87133	50
chr1	1057373	1057696	ALL_peaks_peak_80	116	.	7.20659	14.5794	11.646	74
chr1	1058533	1058769	ALL_peaks_peak_81	127	.	7.58411	15.7023	12.7153	195
chr1	1098162	1098235	ALL_peaks_peak_82	68	.	5.68008	9.55656	6.87133	39
chr1	1166148	1166369	ALL_peaks_peak_83	279	.	12.8748	31.8499	27.9448	108
chr1	1185610	1185855	ALL_peaks_peak_84	255	.	12.1175	29.2288	25.5058	138
chr1	1225672	1225777	ALL_peaks_peak_85	197	.	10.0172	23.1209	19.7608	60
chr1	1226480	1226649	ALL_peaks_peak_86	23	.	3.56913	4.70882	2.37421	25
chr1	1227304	1227491	ALL_peaks_peak_87	197	.	9.99358	23.0791	19.7207	62
chr1	1235494	1235640	ALL_peaks_peak_88	118	.	7.57344	14.7624	11.8126	61
chr1	1235977	1236123	ALL_peaks_peak_89	68	.	5.68008	9.55656	6.87133	20
chr1	1243733	1243846	ALL_peaks_peak_90	42	.	4.54406	6.75426	4.24317	53
chr1	1253770	1253909	ALL_peaks_peak_91	68	.	5.68008	9.55656	6.87133	36
chr1	1280072	1280222	ALL_peaks_peak_92	172	.	9.46679	20.4986	17.2718	84
chr1	1283423	1283526	ALL_peaks_peak_93	19	.	3.40805	4.26042	1.95847	6
chr1	1285256	1285335	ALL_peaks_peak_94	59	.	5.3014	8.59228	5.96277	38
chr1	1299730	1299815	ALL_peaks_peak_95	150	.	8.70945	18.1481	15.037	38
chr1	1307550	1307841	ALL_peaks_peak_96	82	.	6.11071	11.0145	8.25537	85
chr1	1310609	1310956	ALL_peaks_peak_97	89	.	6.29107	11.7139	8.91511	101
chr1	1333458	1333524	ALL_peaks_peak_98	49	.	4.63638	7.48162	4.93201	25
chr1	1334758	1335007	ALL_peaks_peak_99	126	.	7.54976	15.6417	12.6571	121
chr1	1337469	1337647	ALL_peaks_peak_100	133	.	7.66718	16.3207	13.3009	90
chr1	1343254	1343353	ALL_peaks_peak_101	68	.	5.68008	9.55656	6.87133	45
chr1	1365634	1365733	ALL_peaks_peak_102	87	.	6.43742	11.5664	8.7735	56
chr1	1376405	1376518	ALL_peaks_peak_103	107	.	7.19476	13.6746	10.7774	31
chr1	1436499	1436645	ALL_peaks_peak_104	96	.	5.65249	12.4854	9.65465	36
chr1	1440233	1441118	ALL_peaks_peak_105	221	.	8.73878	25.6443	22.1442	229
chr1	1446429	1446571	ALL_peaks_peak_106	139	.	8.33078	17	13.9442	93
chr1	1447428	1447494	ALL_peaks_peak_107	68	.	5.68008	9.55656	6.87133	40
chr1	1486446	1486743	ALL_peaks_peak_108	150	.	8.70945	18.1481	15.037	118
chr1	1509272	1509398	ALL_peaks_peak_109	107	.	7.19476	13.6746	10.7774	63
chr1	1533152	1533269	ALL_peaks_peak_110	128	.	7.95211	15.8712	12.8691	60
chr1	1555599	1555673	ALL_peaks_peak_111	68	.	5.68008	9.55656	6.87133	41
chr1	1590771	1590988	ALL_peaks_peak_112	318	.	13.7571	36.1137	31.8805	92
chr1	1624368	1624479	ALL_peaks_peak_113	86	.	6.14922	11.4685	8.68963	53
chr1	1624695	1624952	ALL_peaks_peak_114	212	.	10.2719	24.7269	21.2808	101
chr1	1655794	1656275	ALL_peaks_peak_115	248	.	10.3794	28.4857	24.8155	348
chr1	1677971	1678222	ALL_peaks_peak_116	202	.	9.97455	23.6136	20.2299	92
chr1	1710484	1710637	ALL_peaks_peak_117	50	.	4.92273	7.65747	5.08577	37
chr1	1720566	1720703	ALL_peaks_peak_118	195	.	10.2241	22.9168	19.5656	91
chr1	1787198	1787345	ALL_peaks_peak_119	62	.	5.30373	8.92784	6.28302	39
chr1	1790838	1790961	ALL_peaks_peak_120	87	.	6.43742	11.5664	8.7735	64
chr1	1805357	1805432	ALL_peaks_peak_121	50	.	4.92273	7.65747	5.08577	33
chr1	1830777	1830848	ALL_peaks_peak_122	26	.	3.78672	5.05267	2.67471	45
chr1	1837635	1837963	ALL_peaks_peak_123	226	.	10.7356	26.1552	22.6289	187
chr1	1850698	1851173	ALL_peaks_peak_124	59	.	5.3014	8.59228	5.96277	247
chr1	1875337	1875889	ALL_peaks_peak_125	172	.	9.46679	20.4986	17.2718	248
chr1	1886412	1886496	ALL_peaks_peak_126	118	.	7.57344	14.7624	11.8126	40
chr1	1891380	1891714	ALL_peaks_peak_127	161	.	9.08812	19.3145	16.1467	275
chr1	1933442	1933671	ALL_peaks_peak_128	87	.	6.43742	11.5664	8.7735	92
chr1	1977988	1978356	ALL_peaks_peak_129	127	.	6.84332	15.7021	12.7152	168
chr1	1980872	1981162	ALL_peaks_peak_130	106	.	6.39163	13.5324	10.65	179
chr1	1981586	1981742	ALL_peaks_peak_131	75	.	5.45984	10.2481	7.53221	117
chr1	2040182	2040262	ALL_peaks_peak_132	59	.	5.3014	8.59228	5.96277	24
chr1	2071322	2071678	ALL_peaks_peak_133	172	.	9.46679	20.4986	17.2718	279
chr1	2105867	2105945	ALL_peaks_peak_134	78	.	6.05875	10.5485	7.80868	28
chr1	2106074	2106152	ALL_peaks_peak_135	50	.	4.92273	7.65747	5.08577	34
chr1	2126480	2126847	ALL_peaks_peak_136	139	.	8.33078	17	13.9442	333
chr1	2144264	2144351	ALL_peaks_peak_137	87	.	6.43742	11.5664	8.7735	38
chr1	2144534	2144651	ALL_peaks_peak_138	59	.	5.3014	8.59228	5.96277	60
chr1	2243049	2243191	ALL_peaks_peak_139	128	.	7.95211	15.8712	12.8691	67
chr1	2313279	2313755	ALL_peaks_peak_140	172	.	9.45752	20.4825	17.2641	96
chr1	2313974	2314254	ALL_peaks_peak_141	117	.	7.52842	14.6857	11.7475	175
chr1	2323007	2323239	ALL_peaks_peak_142	118	.	7.57344	14.7624	11.8126	110
chr1	2345758	2346059	ALL_peaks_peak_143	184	.	9.84547	21.6995	18.4122	257
chr1	2361631	2361713	ALL_peaks_peak_144	68	.	5.68008	9.55656	6.87133	23
chr1	2371891	2371957	ALL_peaks_peak_145	42	.	4.54406	6.75426	4.24317	30
chr1	2400092	2400158	ALL_peaks_peak_146	68	.	5.68008	9.55656	6.87133	43
chr1	2470901	2471007	ALL_peaks_peak_147	50	.	4.92273	7.65747	5.08577	58
chr1	2477746	2477878	ALL_peaks_peak_148	53	.	4.55244	7.93638	5.3512	23
chr1	2478333	2478524	ALL_peaks_peak_149	174	.	8.42533	20.7257	17.4894	111
chr1	2479547	2479749	ALL_peaks_peak_150	137	.	7.40521	16.7849	13.746	82
chr1	2480278	2480354	ALL_peaks_peak_151	41	.	4.13883	6.62224	4.13257	17
chr1	2493508	2493578	ALL_peaks_peak_152	42	.	4.54406	6.75426	4.24317	42
chr1	2515383	2515460	ALL_peaks_peak_153	78	.	6.05875	10.5485	7.80868	30
chr1	2517846	2518027	ALL_peaks_peak_154	42	.	4.54406	6.75426	4.24317	149
chr1	2583634	2583909	ALL_peaks_peak_155	68	.	4.91668	9.57888	6.89248	49
chr1	2585358	2585677	ALL_peaks_peak_156	77	.	5.17545	10.4262	7.70237	228
chr1	2586172	2586238	ALL_peaks_peak_157	26	.	3.39302	5.05154	2.67471	6
chr1	2586350	2586612	ALL_peaks_peak_158	33	.	3.64773	5.74107	3.31897	40
chr1	2615492	2615635	ALL_peaks_peak_159	21	.	3.27752	4.43703	2.12247	19
chr1	2629044	2629332	ALL_peaks_peak_160	67	.	4.82601	9.40206	6.73486	252
chr1	2632349	2632431	ALL_peaks_peak_161	39	.	4.17738	6.42034	3.94274	25
chr1	2633542	2633680	ALL_peaks_peak_162	86	.	6.33619	11.3962	8.62058	86
chr1	2685596	2685690	ALL_peaks_peak_163	41	.	4.30521	6.63606	4.14578	52
chr1	2686819	2686898	ALL_peaks_peak_164	63	.	4.94848	8.97446	6.32733	36
chr1	2687083	2687149	ALL_peaks_peak_165	46	.	4.31655	7.21559	4.68029	19
chr1	2688830	2689089	ALL_peaks_peak_166	157	.	7.51724	18.9194	15.7764	198
chr1	2690556	2690899	ALL_peaks_peak_167	68	.	4.89994	9.54634	6.87133	58
chr1	2693336	2693446	ALL_peaks_peak_168	55	.	4.68439	8.17538	5.57834	46
chr1	2703347	2703458	ALL_peaks_peak_169	50	.	4.92273	7.65747	5.08577	57
chr1	2718268	2718429	ALL_peaks_peak_170	128	.	7.95211	15.8712	12.8691	96
chr1	2738636	2738702	ALL_peaks_peak_171	34	.	4.16539	5.88505	3.43822	34
chr1	2790760	2790835	ALL_peaks_peak_172	50	.	4.92273	7.65747	5.08577	27
chr1	2792642	2792765	ALL_peaks_peak_173	42	.	4.54406	6.75426	4.24317	17
chr1	2838744	2838851	ALL_peaks_peak_174	78	.	6.05875	10.5485	7.80868	51
chr1	2929028	2929253	ALL_peaks_peak_175	78	.	6.05875	10.5485	7.80868	17
chr1	2940730	2940830	ALL_peaks_peak_176	97	.	6.81609	12.6089	9.76383	56
chr1	2982828	2982941	ALL_peaks_peak_177	68	.	5.68008	9.55656	6.87133	77
chr1	2986249	2986357	ALL_peaks_peak_178	68	.	5.68008	9.55656	6.87133	51
chr1	3103202	3103268	ALL_peaks_peak_179	19	.	3.40805	4.26042	1.95847	1
chr1	3200703	3200866	ALL_peaks_peak_180	78	.	6.05875	10.5485	7.80868	107
chr1	3229822	3229889	ALL_peaks_peak_181	34	.	4.16539	5.88505	3.43822	7
chr1	3236537	3236901	ALL_peaks_peak_182	341	.	14.7682	38.6167	34.1705	156
chr1	3276332	3276399	ALL_peaks_peak_183	50	.	4.92273	7.65747	5.08577	30
chr1	3326821	3326974	ALL_peaks_peak_184	139	.	8.33078	17	13.9442	92
chr1	3341394	3341663	ALL_peaks_peak_185	118	.	7.57344	14.7624	11.8126	64
chr1	3347975	3348042	ALL_peaks_peak_186	68	.	5.68008	9.55656	6.87133	26
chr1	3369650	3369992	ALL_peaks_peak_187	114	.	7.06262	14.3252	11.4021	249
chr1	3370801	3371057	ALL_peaks_peak_188	68	.	5.42925	9.4839	6.81267	145
chr1	3398989	3399309	ALL_peaks_peak_189	85	.	6.30517	11.3439	8.57054	49
chr1	3400533	3400689	ALL_peaks_peak_190	33	.	4.06985	5.73228	3.31065	9
chr1	3407882	3408050	ALL_peaks_peak_191	78	.	6.05875	10.5485	7.80868	60
chr1	3434900	3434970	ALL_peaks_peak_192	59	.	5.3014	8.59228	5.96277	34
chr1	3447046	3447367	ALL_peaks_peak_193	184	.	9.84547	21.6995	18.4122	101
chr1	3470095	3470227	ALL_peaks_peak_194	68	.	5.68008	9.55656	6.87133	37
chr1	3481931	3482010	ALL_peaks_peak_195	78	.	6.05875	10.5485	7.80868	36
chr1	3503772	3504278	ALL_peaks_peak_196	159	.	8.69747	19.1507	15.9979	137
chr1	3531860	3532112	ALL_peaks_peak_197	129	.	7.74266	15.9811	12.9746	70
chr1	3535657	3535982	ALL_peaks_peak_198	190	.	8.43926	22.3261	19.0108	73
chr1	3537799	3538107	ALL_peaks_peak_199	363	.	13.0541	41.011	36.3621	121
chr1	3566663	3566755	ALL_peaks_peak_200	34	.	4.16539	5.88505	3.43822	86
chr1	3612150	3612410	ALL_peaks_peak_201	87	.	6.43742	11.5664	8.7735	195
chr1	3625573	3625719	ALL_peaks_peak_202	42	.	4.54406	6.75426	4.24317	112
chr1	3641114	3641371	ALL_peaks_peak_203	139	.	8.33078	17	13.9442	58
chr1	3644000	3644090	ALL_peaks_peak_204	118	.	7.57344	14.7624	11.8126	63
chr1	3692605	3692703	ALL_peaks_peak_205	107	.	7.19476	13.6746	10.7774	48
chr1	3702149	3702235	ALL_peaks_peak_206	97	.	6.81609	12.6089	9.76383	43
chr1	3713048	3713210	ALL_peaks_peak_207	97	.	6.81609	12.6089	9.76383	56
chr1	3718105	3718429	ALL_peaks_peak_208	304	.	13.2998	34.6082	30.4929	132
chr1	3773755	3774012	ALL_peaks_peak_209	207	.	10.6028	24.1499	20.7324	141
chr1	3786599	3786671	ALL_peaks_peak_210	59	.	5.3014	8.59228	5.96277	61
chr1	3799924	3800036	ALL_peaks_peak_211	59	.	5.3014	8.59228	5.96277	78
chr1	3807762	3807902	ALL_peaks_peak_212	128	.	7.95211	15.8712	12.8691	86
chr1	3817158	3817401	ALL_peaks_peak_213	68	.	5.68008	9.55656	6.87133	208
chr1	3817944	3818055	ALL_peaks_peak_214	42	.	4.54406	6.75426	4.24317	38
chr1	3823905	3824032	ALL_peaks_peak_215	128	.	7.95211	15.8712	12.8691	61
chr1	3824944	3825011	ALL_peaks_peak_216	78	.	6.05875	10.5485	7.80868	21
chr1	3827304	3827684	ALL_peaks_peak_217	128	.	7.95211	15.8712	12.8691	234
chr1	4233377	4233446	ALL_peaks_peak_218	68	.	5.68008	9.55656	6.87133	18
chr1	4363168	4363363	ALL_peaks_peak_219	59	.	5.3014	8.59228	5.96277	33
chr1	4377415	4377494	ALL_peaks_peak_220	87	.	6.43742	11.5664	8.7735	44
chr1	4615744	4615819	ALL_peaks_peak_221	87	.	6.43742	11.5664	8.7735	26
chr1	4654558	4654637	ALL_peaks_peak_222	97	.	6.81609	12.6089	9.76383	53
chr1	4712568	4712856	ALL_peaks_peak_223	109	.	6.58092	13.8869	10.9815	60
chr1	4716457	4716827	ALL_peaks_peak_224	174	.	8.39315	20.6633	17.4296	265
chr1	4761034	4761156	ALL_peaks_peak_225	42	.	4.54406	6.75426	4.24317	65
chr1	4838111	4838254	ALL_peaks_peak_226	68	.	5.68008	9.55656	6.87133	25
chr1	4886255	4886381	ALL_peaks_peak_227	230	.	11.3602	26.6609	23.099	70
chr1	5179737	5179818	ALL_peaks_peak_228	97	.	6.81609	12.6089	9.76383	32
chr1	5454350	5454416	ALL_peaks_peak_229	59	.	5.3014	8.59228	5.96277	34
chr1	5542029	5542233	ALL_peaks_peak_230	279	.	12.8748	31.8499	27.9448	77
chr1	5570073	5570154	ALL_peaks_peak_231	97	.	6.81609	12.6089	9.76383	38
chr1	5574364	5574430	ALL_peaks_peak_232	50	.	4.92273	7.65747	5.08577	22
chr1	5574576	5574862	ALL_peaks_peak_233	139	.	8.33078	17	13.9442	235
chr1	5658704	5659025	ALL_peaks_peak_234	172	.	9.46679	20.4986	17.2718	82
chr1	5681166	5681360	ALL_peaks_peak_235	207	.	10.6028	24.1499	20.7324	115
chr1	5697246	5697514	ALL_peaks_peak_236	230	.	11.3602	26.6609	23.099	185
chr1	5701029	5701138	ALL_peaks_peak_237	50	.	4.92273	7.65747	5.08577	53
chr1	5730400	5730512	ALL_peaks_peak_238	40	.	3.54876	6.49472	4.01297	56
chr1	5731893	5732027	ALL_peaks_peak_239	36	.	3.37736	6.12007	3.66002	114
chr1	5734198	5734305	ALL_peaks_peak_240	20	.	2.94402	4.4038	2.09186	105
chr1	5735412	5735498	ALL_peaks_peak_241	56	.	4.27427	8.29301	5.69012	33
chr1	5805959	5806305	ALL_peaks_peak_242	207	.	10.6028	24.1499	20.7324	66
chr1	5953838	5954142	ALL_peaks_peak_243	195	.	10.2241	22.9168	19.5656	117
chr1	5976185	5976463	ALL_peaks_peak_244	219	.	10.9815	25.3981	21.9106	52
chr1	6035359	6035464	ALL_peaks_peak_245	172	.	9.46679	20.4986	17.2718	42
chr1	6052594	6052747	ALL_peaks_peak_246	50	.	4.92273	7.65747	5.08577	29
chr1	6094483	6094784	ALL_peaks_peak_247	161	.	9.08812	19.3145	16.1467	199
chr1	6101653	6101719	ALL_peaks_peak_248	42	.	4.54406	6.75426	4.24317	40
chr1	6112637	6113272	ALL_peaks_peak_249	371	.	14.9596	41.8432	37.1215	511
chr1	6119143	6119256	ALL_peaks_peak_250	34	.	4.16539	5.88505	3.43822	5
chr1	6140803	6140933	ALL_peaks_peak_251	87	.	6.43742	11.5664	8.7735	34
chr1	6142507	6142591	ALL_peaks_peak_252	97	.	6.81609	12.6089	9.76383	32
chr1	6159919	6160049	ALL_peaks_peak_253	118	.	7.57344	14.7624	11.8126	48
chr1	6165378	6165445	ALL_peaks_peak_254	50	.	4.92273	7.65747	5.08577	34
chr1	6168992	6169126	ALL_peaks_peak_255	150	.	8.70945	18.1481	15.037	91
chr1	6177822	6177888	ALL_peaks_peak_256	34	.	4.16539	5.88505	3.43822	35
chr1	6201716	6201993	ALL_peaks_peak_257	184	.	9.84547	21.6995	18.4122	148
chr1	6217943	6218112	ALL_peaks_peak_258	128	.	7.95211	15.8712	12.8691	63
chr1	6231746	6231870	ALL_peaks_peak_259	42	.	4.54406	6.75426	4.24317	48
chr1	6243619	6243776	ALL_peaks_peak_260	97	.	6.81609	12.6089	9.76383	120
chr1	6245998	6246149	ALL_peaks_peak_261	96	.	6.74208	12.4838	9.65319	57
chr1	6253564	6253643	ALL_peaks_peak_262	118	.	7.57344	14.7624	11.8126	45
chr1	6259652	6259833	ALL_peaks_peak_263	184	.	9.84547	21.6995	18.4122	60
chr1	6265048	6265756	ALL_peaks_peak_264	185	.	8.73261	21.8488	18.5546	367
chr1	6266178	6266348	ALL_peaks_peak_265	26	.	3.50652	5.03374	2.67471	34
chr1	6280433	6280593	ALL_peaks_peak_266	128	.	7.95211	15.8712	12.8691	69
chr1	6298833	6298923	ALL_peaks_peak_267	59	.	5.3014	8.59228	5.96277	62
chr1	6305186	6305385	ALL_peaks_peak_268	97	.	6.56485	12.5937	9.75841	136
chr1	6306165	6306235	ALL_peaks_peak_269	60	.	5.14756	8.66374	6.03105	51
chr1	6306629	6307063	ALL_peaks_peak_270	96	.	6.47624	12.4392	9.61032	315
chr1	6360966	6361053	ALL_peaks_peak_271	118	.	7.57344	14.7624	11.8126	28
chr1	6403611	6403923	ALL_peaks_peak_272	310	.	11.8611	35.2146	31.055	158
chr1	6408089	6408202	ALL_peaks_peak_273	55	.	4.64846	8.11054	5.51684	55
chr1	6417437	6417561	ALL_peaks_peak_274	97	.	6.81609	12.6089	9.76383	65
chr1	6423058	6423431	ALL_peaks_peak_275	302	.	12.1087	34.3922	30.2988	204
chr1	6445800	6446087	ALL_peaks_peak_276	66	.	5.53628	9.31751	6.65435	207
chr1	6453753	6453880	ALL_peaks_peak_277	49	.	4.66698	7.53358	4.98114	73
chr1	6454023	6454170	ALL_peaks_peak_278	50	.	4.70841	7.60377	5.04764	39
chr1	6457218	6457301	ALL_peaks_peak_279	77	.	5.76858	10.428	7.70397	34
chr1	6464813	6465152	ALL_peaks_peak_280	130	.	7.25076	16.0273	13.019	104
chr1	6469249	6469368	ALL_peaks_peak_281	184	.	8.66601	21.7194	18.4309	55
chr1	6473092	6473158	ALL_peaks_peak_282	53	.	4.71995	7.92859	5.34383	34
chr1	6474530	6474678	ALL_peaks_peak_283	130	.	7.79699	16.0762	13.0661	88
chr1	6483409	6483764	ALL_peaks_peak_284	210	.	9.25043	24.5064	21.0714	275
chr1	6487939	6488120	ALL_peaks_peak_285	43	.	4.11342	6.84801	4.33208	36
chr1	6491313	6491379	ALL_peaks_peak_286	41	.	4.48363	6.65655	4.16492	38
chr1	6497190	6497331	ALL_peaks_peak_287	168	.	7.58169	20.0291	16.8314	54
chr1	6498176	6498542	ALL_peaks_peak_288	169	.	7.63096	20.1335	16.931	112
chr1	6505286	6505410	ALL_peaks_peak_289	110	.	7.1048	13.9578	11.0495	60
chr1	6524717	6524807	ALL_peaks_peak_290	68	.	5.68008	9.55656	6.87133	40
chr1	6530107	6530173	ALL_peaks_peak_291	55	.	4.86129	8.1737	5.57681	48
chr1	6531566	6531772	ALL_peaks_peak_292	80	.	5.35848	10.7818	8.03242	124
chr1	6532278	6532420	ALL_peaks_peak_293	36	.	3.83919	6.08905	3.63064	46
chr1	6535704	6535988	ALL_peaks_peak_294	186	.	8.50107	21.9237	18.6263	30
chr1	6546595	6546822	ALL_peaks_peak_295	189	.	8.1365	22.2159	18.9056	143
chr1	6550069	6550218	ALL_peaks_peak_296	62	.	4.73884	8.90873	6.2648	43
chr1	6550368	6550680	ALL_peaks_peak_297	55	.	4.48336	8.11105	5.51726	36
chr1	6583790	6584122	ALL_peaks_peak_298	309	.	13.5899	35.1279	30.9749	46
chr1	6607504	6607586	ALL_peaks_peak_299	42	.	4.54406	6.75426	4.24317	31
chr1	6614571	6614933	ALL_peaks_peak_300	150	.	8.70945	18.1481	15.037	114
chr1	6639883	6640012	ALL_peaks_peak_301	68	.	5.68008	9.55656	6.87133	63
chr1	6644346	6644430	ALL_peaks_peak_302	78	.	6.05875	10.5485	7.80868	41
chr1	6669757	6669922	ALL_peaks_peak_303	145	.	8.38682	17.5902	14.5105	95
chr1	6673589	6673730	ALL_peaks_peak_304	65	.	5.46966	9.20629	6.54839	47
chr1	6694817	6694924	ALL_peaks_peak_305	107	.	7.19476	13.6746	10.7774	49
chr1	6696339	6696405	ALL_peaks_peak_306	68	.	5.68008	9.55656	6.87133	34
chr1	6706668	6706852	ALL_peaks_peak_307	291	.	13.2535	33.1796	29.1749	62
chr1	6748437	6748567	ALL_peaks_peak_308	34	.	4.16539	5.88505	3.43822	28
chr1	6761882	6762212	ALL_peaks_peak_309	128	.	7.95211	15.8712	12.8691	84
chr1	6780003	6780400	ALL_peaks_peak_310	338	.	14.5718	38.2683	33.8567	231
chr1	6787512	6787918	ALL_peaks_peak_311	255	.	12.1175	29.2288	25.5058	206
chr1	6845053	6845465	ALL_peaks_peak_312	249	.	11.4021	28.5814	24.9054	161
chr1	6854198	6854590	ALL_peaks_peak_313	170	.	9.04537	20.2941	17.0845	163
chr1	6950084	6950363	ALL_peaks_peak_314	267	.	12.4962	30.5329	26.7222	56
chr1	7015595	7015713	ALL_peaks_peak_315	184	.	9.84547	21.6995	18.4122	55
chr1	7019692	7019790	ALL_peaks_peak_316	33	.	3.97404	5.82193	3.39448	60
chr1	7023042	7023243	ALL_peaks_peak_317	65	.	5.45653	9.18433	6.52754	74
chr1	7023423	7023511	ALL_peaks_peak_318	57	.	5.14214	8.32941	5.72466	50
chr1	7058403	7058654	ALL_peaks_peak_319	316	.	14.0108	35.875	31.6586	94
chr1	7102835	7103043	ALL_peaks_peak_320	279	.	12.8748	31.8499	27.9448	122
chr1	7106487	7106582	ALL_peaks_peak_321	19	.	3.40805	4.26042	1.95847	3
chr1	7130548	7130916	ALL_peaks_peak_322	242	.	11.7388	27.938	24.2983	86
chr1	7177614	7177878	ALL_peaks_peak_323	279	.	12.492	31.8248	27.929	97
chr1	7181069	7181225	ALL_peaks_peak_324	98	.	6.61007	12.6722	9.82451	61
chr1	7246913	7246992	ALL_peaks_peak_325	97	.	6.81609	12.6089	9.76383	32
chr1	7261522	7261588	ALL_peaks_peak_326	68	.	5.68008	9.55656	6.87133	34
chr1	7267975	7268245	ALL_peaks_peak_327	316	.	14.0108	35.875	31.6586	164
chr1	7268351	7268417	ALL_peaks_peak_328	34	.	4.16539	5.88505	3.43822	18
chr1	7278164	7278308	ALL_peaks_peak_329	34	.	4.16539	5.88505	3.43822	116
chr1	7278403	7278725	ALL_peaks_peak_330	184	.	9.84547	21.6995	18.4122	73
chr1	7284897	7285045	ALL_peaks_peak_331	161	.	9.08812	19.3145	16.1467	105
chr1	7347265	7347331	ALL_peaks_peak_332	42	.	4.54406	6.75426	4.24317	30
chr1	7363040	7363188	ALL_peaks_peak_333	219	.	10.9815	25.3981	21.9106	64
chr1	7514222	7514357	ALL_peaks_peak_334	139	.	8.33078	17	13.9442	63
chr1	7535269	7535396	ALL_peaks_peak_335	107	.	7.19476	13.6746	10.7774	65
chr1	7599598	7600059	ALL_peaks_peak_336	277	.	12.7666	31.6593	27.7749	290
chr1	7621635	7621715	ALL_peaks_peak_337	87	.	6.43742	11.5664	8.7735	45
chr1	7707441	7707556	ALL_peaks_peak_338	68	.	5.68008	9.55656	6.87133	21
chr1	7727587	7727895	ALL_peaks_peak_339	253	.	11.6682	29.0619	25.3565	195
chr1	7729612	7729930	ALL_peaks_peak_340	128	.	7.65377	15.8251	12.8326	79
chr1	7812994	7813309	ALL_peaks_peak_341	183	.	9.50236	21.6482	18.3705	63
chr1	7815637	7815777	ALL_peaks_peak_342	164	.	8.68636	19.6497	16.4681	69
chr1	7828833	7828905	ALL_peaks_peak_343	50	.	4.92273	7.65747	5.08577	31
chr1	7843998	7844163	ALL_peaks_peak_344	34	.	4.16539	5.88505	3.43822	25
chr1	7845341	7845425	ALL_peaks_peak_345	68	.	5.68008	9.55656	6.87133	34
chr1	7868364	7868743	ALL_peaks_peak_346	329	.	14.3895	37.2403	32.9119	127
chr1	7916586	7916698	ALL_peaks_peak_347	97	.	6.81609	12.6089	9.76383	56
chr1	7939364	7939496	ALL_peaks_peak_348	26	.	3.78672	5.05267	2.67471	88
chr1	7962906	7963072	ALL_peaks_peak_349	279	.	12.8748	31.8499	27.9448	77
chr1	7992929	7993085	ALL_peaks_peak_350	172	.	9.46679	20.4986	17.2718	110
chr1	8014259	8014339	ALL_peaks_peak_351	26	.	3.78672	5.05267	2.67471	30
chr1	8021469	8021610	ALL_peaks_peak_352	97	.	6.81609	12.6089	9.76383	60
chr1	8035331	8035610	ALL_peaks_peak_353	291	.	13.2535	33.1796	29.1749	161
chr1	8042241	8042632	ALL_peaks_peak_354	380	.	15.9042	42.8109	38.0029	282
chr1	8075041	8075292	ALL_peaks_peak_355	251	.	11.5603	28.8676	25.174	180
chr1	8080197	8080295	ALL_peaks_peak_356	35	.	4.07194	5.98397	3.53158	34
chr1	8088473	8088556	ALL_peaks_peak_357	44	.	4.51232	6.98214	4.45922	26
chr1	8091247	8091497	ALL_peaks_peak_358	164	.	8.96507	19.6237	16.4433	204
chr1	8121460	8121803	ALL_peaks_peak_359	195	.	10.2241	22.9168	19.5656	64
chr1	8137404	8137504	ALL_peaks_peak_360	107	.	7.19476	13.6746	10.7774	39
chr1	8242579	8242666	ALL_peaks_peak_361	42	.	4.54406	6.75426	4.24317	24
chr1	8374342	8374776	ALL_peaks_peak_362	172	.	9.43396	20.4417	17.2254	211
chr1	8375969	8376111	ALL_peaks_peak_363	148	.	8.57249	17.912	14.8188	63
chr1	8391353	8391460	ALL_peaks_peak_364	68	.	5.68008	9.55656	6.87133	25
chr1	8409178	8409288	ALL_peaks_peak_365	107	.	7.19476	13.6746	10.7774	45
chr1	8411872	8411966	ALL_peaks_peak_366	172	.	9.46679	20.4986	17.2718	39
chr1	8434831	8435125	ALL_peaks_peak_367	255	.	12.1175	29.2288	25.5058	226
chr1	8458842	8458988	ALL_peaks_peak_368	150	.	8.70945	18.1481	15.037	107
chr1	8469210	8469481	ALL_peaks_peak_369	146	.	8.19896	17.7567	14.6702	222
chr1	8472266	8472815	ALL_peaks_peak_370	142	.	7.98297	17.3698	14.2991	114
chr1	8499681	8499761	ALL_peaks_peak_371	139	.	8.33078	17	13.9442	34
chr1	8503716	8503791	ALL_peaks_peak_372	78	.	6.05875	10.5485	7.80868	31
chr1	8520339	8520478	ALL_peaks_peak_373	128	.	7.95211	15.8712	12.8691	96
chr1	8620873	8621512	ALL_peaks_peak_374	207	.	10.6028	24.1499	20.7324	407
chr1	8631329	8631505	ALL_peaks_peak_375	161	.	9.08812	19.3145	16.1467	55
chr1	8635214	8635329	ALL_peaks_peak_376	59	.	5.28302	8.56201	5.94549	50
chr1	8676874	8677023	ALL_peaks_peak_377	128	.	7.95211	15.8712	12.8691	104
chr1	8731390	8731774	ALL_peaks_peak_378	293	.	12.6116	33.3587	29.3415	172
chr1	8762365	8762476	ALL_peaks_peak_379	42	.	4.54406	6.75426	4.24317	79
chr1	8763617	8763707	ALL_peaks_peak_380	87	.	6.43742	11.5664	8.7735	31
chr1	8779101	8779183	ALL_peaks_peak_381	107	.	7.19476	13.6746	10.7774	40
chr1	8786549	8786966	ALL_peaks_peak_382	336	.	13.6977	38.0874	33.6894	199
chr1	8799526	8799654	ALL_peaks_peak_383	42	.	4.54406	6.75426	4.24317	96
chr1	8854802	8854871	ALL_peaks_peak_384	68	.	5.68008	9.55656	6.87133	25
chr1	8891360	8891627	ALL_peaks_peak_385	87	.	6.43742	11.5664	8.7735	230
chr1	8908935	8909275	ALL_peaks_peak_386	219	.	10.9815	25.3981	21.9106	209
chr1	8919540	8919714	ALL_peaks_peak_387	297	.	12.8428	33.7812	29.7339	108
chr1	8922641	8922760	ALL_peaks_peak_388	194	.	9.80873	22.7499	19.4146	49
chr1	8931727	8931878	ALL_peaks_peak_389	150	.	8.70945	18.1481	15.037	62
chr1	8933806	8933895	ALL_peaks_peak_390	42	.	4.54406	6.75426	4.24317	57
chr1	8938779	8938869	ALL_peaks_peak_391	47	.	4.70639	7.30303	4.76318	35
chr1	8939501	8939574	ALL_peaks_peak_392	68	.	5.66038	9.52389	6.8508	13
chr1	8940230	8940334	ALL_peaks_peak_393	58	.	5.21804	8.45488	5.84382	41
chr1	8964105	8964250	ALL_peaks_peak_394	87	.	6.43742	11.5664	8.7735	50
chr1	8973723	8973789	ALL_peaks_peak_395	19	.	3.29012	4.26312	1.96081	60
chr1	8978163	8978415	ALL_peaks_peak_396	350	.	14.094	39.5272	35.0047	166
chr1	9023043	9023233	ALL_peaks_peak_397	230	.	11.3602	26.6609	23.099	73
chr1	9048245	9048509	ALL_peaks_peak_398	107	.	7.19476	13.6746	10.7774	44
chr1	9053529	9053598	ALL_peaks_peak_399	87	.	6.43742	11.5664	8.7735	26
chr1	9065289	9065496	ALL_peaks_peak_400	304	.	13.6322	34.5214	30.4131	64
chr1	9070184	9070295	ALL_peaks_peak_401	50	.	4.92273	7.65747	5.08577	88
chr1	9161729	9161872	ALL_peaks_peak_402	118	.	7.57344	14.7624	11.8126	60
chr1	9170094	9170291	ALL_peaks_peak_403	267	.	11.8235	30.6107	26.7952	95
chr1	9170765	9171067	ALL_peaks_peak_404	174	.	8.96117	20.6751	17.4407	138
chr1	9184567	9184785	ALL_peaks_peak_405	87	.	6.43742	11.5664	8.7735	46
chr1	9186724	9186800	ALL_peaks_peak_406	75	.	5.89102	10.2677	7.55102	33
chr1	9202208	9202558	ALL_peaks_peak_407	219	.	10.9815	25.3981	21.9106	266
chr1	9240446	9240580	ALL_peaks_peak_408	35	.	3.95113	6.03402	3.57867	17
chr1	9241273	9241345	ALL_peaks_peak_409	50	.	4.54078	7.6145	5.05771	35
chr1	9241461	9242107	ALL_peaks_peak_410	170	.	8.45921	20.2703	17.0617	65
chr1	9256650	9256765	ALL_peaks_peak_411	97	.	6.81609	12.6089	9.76383	40
chr1	9294202	9294705	ALL_peaks_peak_412	97	.	6.81609	12.6089	9.76383	456
chr1	9310262	9310342	ALL_peaks_peak_413	78	.	6.05875	10.5485	7.80868	55
chr1	9327112	9327391	ALL_peaks_peak_414	172	.	9.46679	20.4986	17.2718	229
chr1	9348959	9349304	ALL_peaks_peak_415	230	.	11.3602	26.6609	23.099	281
chr1	9349559	9349630	ALL_peaks_peak_416	26	.	3.78672	5.05267	2.67471	41
chr1	9355196	9355262	ALL_peaks_peak_417	34	.	4.16539	5.88505	3.43822	5
chr1	9488762	9488985	ALL_peaks_peak_418	150	.	8.70945	18.1481	15.037	50
chr1	9515973	9516208	ALL_peaks_peak_419	78	.	6.05875	10.5485	7.80868	44
chr1	9537090	9537211	ALL_peaks_peak_420	68	.	5.68008	9.55656	6.87133	49
chr1	9551221	9551408	ALL_peaks_peak_421	137	.	7.91085	16.7549	13.7172	87
chr1	9555144	9555523	ALL_peaks_peak_422	92	.	6.26484	12.0678	9.25459	286
chr1	9606795	9606925	ALL_peaks_peak_423	107	.	7.19476	13.6746	10.7774	78
chr1	9633100	9633278	ALL_peaks_peak_424	145	.	8.38682	17.5902	14.5105	46
chr1	9633902	9634020	ALL_peaks_peak_425	66	.	5.56339	9.36267	6.69736	62
chr1	9648378	9648777	ALL_peaks_peak_426	78	.	6.05875	10.5485	7.80868	272
chr1	9675763	9675886	ALL_peaks_peak_427	161	.	9.08812	19.3145	16.1467	50
chr1	9687121	9687285	ALL_peaks_peak_428	219	.	10.9815	25.3981	21.9106	40
chr1	9752002	9752084	ALL_peaks_peak_429	59	.	5.3014	8.59228	5.96277	31
chr1	9762372	9762543	ALL_peaks_peak_430	433	.	17.4189	48.5451	43.3038	109
chr1	9779194	9779393	ALL_peaks_peak_431	87	.	6.43742	11.5664	8.7735	118
chr1	9781917	9782048	ALL_peaks_peak_432	59	.	5.3014	8.59228	5.96277	83
chr1	9785098	9785316	ALL_peaks_peak_433	195	.	10.2241	22.9168	19.5656	153
chr1	9844564	9844879	ALL_peaks_peak_434	304	.	13.6322	34.5214	30.4131	230
chr1	9852381	9852520	ALL_peaks_peak_435	161	.	9.08812	19.3145	16.1467	40
chr1	9885599	9886001	ALL_peaks_peak_436	69	.	5.49073	9.58929	6.90257	58
chr1	9888029	9888314	ALL_peaks_peak_437	163	.	8.92284	19.5494	16.372	79
chr1	9903676	9903762	ALL_peaks_peak_438	59	.	5.3014	8.59228	5.96277	32
chr1	9927661	9927940	ALL_peaks_peak_439	267	.	12.4962	30.5329	26.7222	54
chr1	9934874	9935138	ALL_peaks_peak_440	207	.	10.6028	24.1499	20.7324	216
chr1	9960846	9960912	ALL_peaks_peak_441	34	.	4.16539	5.88505	3.43822	16
chr1	9970502	9970785	ALL_peaks_peak_442	110	.	7.1048	13.9578	11.0495	125
chr1	9974608	9974690	ALL_peaks_peak_443	102	.	6.84586	13.0793	10.2156	34
chr1	10002527	10002696	ALL_peaks_peak_444	281	.	11.596	32.1015	28.1795	51
chr1	10002815	10002965	ALL_peaks_peak_445	49	.	4.49586	7.53514	4.98246	93
chr1	10003081	10003151	ALL_peaks_peak_446	49	.	4.50478	7.55091	4.99749	27
chr1	10003252	10003566	ALL_peaks_peak_447	74	.	5.38439	10.1113	7.4015	54
chr1	10010428	10010766	ALL_peaks_peak_448	343	.	14.07	38.7758	34.3154	115
chr1	10092658	10092836	ALL_peaks_peak_449	127	.	6.88061	15.7752	12.785	57
chr1	10093776	10093849	ALL_peaks_peak_450	65	.	4.90063	9.21595	6.5578	18
chr1	10094606	10094732	ALL_peaks_peak_451	64	.	4.83975	9.10084	6.44789	47
chr1	10116454	10116520	ALL_peaks_peak_452	42	.	4.54406	6.75426	4.24317	15
chr1	10118686	10118758	ALL_peaks_peak_453	59	.	5.3014	8.59228	5.96277	55
chr1	10162152	10162422	ALL_peaks_peak_454	184	.	9.84547	21.6995	18.4122	41
chr1	10175954	10176025	ALL_peaks_peak_455	59	.	5.3014	8.59228	5.96277	29
chr1	10206546	10206621	ALL_peaks_peak_456	107	.	7.19476	13.6746	10.7774	20
chr1	10213134	10213305	ALL_peaks_peak_457	184	.	9.84547	21.6995	18.4122	54
chr1	10269974	10270533	ALL_peaks_peak_458	119	.	7.12989	14.8923	11.9378	254
chr1	10398259	10398385	ALL_peaks_peak_459	195	.	10.2241	22.9168	19.5656	62
chr1	10437403	10437696	ALL_peaks_peak_460	304	.	13.6322	34.5214	30.4131	242
chr1	10458951	10459124	ALL_peaks_peak_461	68	.	5.68008	9.55656	6.87133	28
chr1	10488176	10488556	ALL_peaks_peak_462	243	.	10.408	27.941	24.3011	97
chr1	10490176	10490480	ALL_peaks_peak_463	93	.	6.10314	12.1782	9.36058	254
chr1	10554747	10555333	ALL_peaks_peak_464	243	.	11.4482	28.0439	24.398	131
chr1	10567519	10567810	ALL_peaks_peak_465	241	.	10.9766	27.8039	24.1795	130
chr1	10571053	10571242	ALL_peaks_peak_466	71	.	5.22952	9.82818	7.13115	142
chr1	10574582	10574755	ALL_peaks_peak_467	168	.	8.90228	20.0384	16.8402	82
chr1	10622192	10622258	ALL_peaks_peak_468	59	.	5.3014	8.59228	5.96277	29
chr1	10646187	10646669	ALL_peaks_peak_469	161	.	9.08812	19.3145	16.1467	217
chr1	10690146	10690228	ALL_peaks_peak_470	68	.	5.68008	9.55656	6.87133	34
chr1	10706583	10706654	ALL_peaks_peak_471	78	.	6.05875	10.5485	7.80868	29
chr1	10752374	10752694	ALL_peaks_peak_472	128	.	7.95211	15.8712	12.8691	230
chr1	10753898	10754012	ALL_peaks_peak_473	34	.	4.16539	5.88505	3.43822	43
chr1	10848932	10849022	ALL_peaks_peak_474	34	.	4.16539	5.88505	3.43822	43
chr1	10853576	10853660	ALL_peaks_peak_475	34	.	4.13037	5.82911	3.40122	44
chr1	10927293	10927399	ALL_peaks_peak_476	50	.	4.92273	7.65747	5.08577	61
chr1	10970116	10970232	ALL_peaks_peak_477	87	.	6.43742	11.5664	8.7735	24
chr1	11001898	11002062	ALL_peaks_peak_478	50	.	4.92273	7.65747	5.08577	129
chr1	11002174	11002480	ALL_peaks_peak_479	68	.	5.68008	9.55656	6.87133	115
chr1	11021155	11021484	ALL_peaks_peak_480	266	.	12.4219	30.4023	26.6077	88
chr1	11092369	11092450	ALL_peaks_peak_481	107	.	7.19476	13.6746	10.7774	45
chr1	11097464	11097636	ALL_peaks_peak_482	42	.	4.54406	6.75426	4.24317	127
chr1	11097729	11097920	ALL_peaks_peak_483	304	.	13.6322	34.5214	30.4131	83
chr1	11120150	11120260	ALL_peaks_peak_484	145	.	8.40705	17.6254	14.5444	61
chr1	11121915	11121982	ALL_peaks_peak_485	40	.	4.39689	6.51589	4.03253	6
chr1	11124092	11124175	ALL_peaks_peak_486	87	.	6.43742	11.5664	8.7735	26
chr1	11136509	11136575	ALL_peaks_peak_487	68	.	5.68008	9.55656	6.87133	23
chr1	11193136	11193204	ALL_peaks_peak_488	78	.	6.05875	10.5485	7.80868	33
chr1	11301828	11302107	ALL_peaks_peak_489	279	.	12.8748	31.8499	27.9448	109
chr1	11322631	11323010	ALL_peaks_peak_490	107	.	7.19476	13.6746	10.7774	65
chr1	11346282	11346510	ALL_peaks_peak_491	219	.	10.9815	25.3981	21.9106	179
chr1	11380365	11380446	ALL_peaks_peak_492	68	.	5.68008	9.55656	6.87133	31
chr1	11397494	11397807	ALL_peaks_peak_493	118	.	7.57344	14.7624	11.8126	65
chr1	11424395	11424511	ALL_peaks_peak_494	195	.	10.2241	22.9168	19.5656	54
chr1	11538794	11538911	ALL_peaks_peak_495	78	.	6.05875	10.5485	7.80868	79
chr1	11595991	11596078	ALL_peaks_peak_496	107	.	7.19476	13.6746	10.7774	41
chr1	11610906	11610980	ALL_peaks_peak_497	59	.	5.3014	8.59228	5.96277	17
chr1	11632355	11632478	ALL_peaks_peak_498	184	.	9.84547	21.6995	18.4122	59
chr1	11654385	11654462	ALL_peaks_peak_499	59	.	5.3014	8.59228	5.96277	40
chr1	11677514	11677636	ALL_peaks_peak_500	207	.	10.6028	24.1499	20.7324	57
chr1	11696032	11696104	ALL_peaks_peak_501	50	.	4.92273	7.65747	5.08577	44
chr1	11702622	11702901	ALL_peaks_peak_502	176	.	9.08051	20.8915	17.648	52
chr1	11705830	11706031	ALL_peaks_peak_503	422	.	15.1966	47.4641	42.291	75
chr1	11710540	11710696	ALL_peaks_peak_504	62	.	5.30373	8.92784	6.28302	41
chr1	11724032	11724301	ALL_peaks_peak_505	87	.	6.43742	11.5664	8.7735	239
chr1	11767431	11767515	ALL_peaks_peak_506	150	.	8.70945	18.1481	15.037	44
chr1	11771141	11771402	ALL_peaks_peak_507	255	.	12.1175	29.2288	25.5058	213
chr1	11779751	11780250	ALL_peaks_peak_508	118	.	7.57344	14.7624	11.8126	268
chr1	11809312	11809472	ALL_peaks_peak_509	118	.	7.57344	14.7624	11.8126	78
chr1	11845323	11845437	ALL_peaks_peak_510	150	.	8.70945	18.1481	15.037	50
chr1	11898820	11898986	ALL_peaks_peak_511	128	.	7.95211	15.8712	12.8691	90
chr1	11905751	11905847	ALL_peaks_peak_512	34	.	4.16539	5.88505	3.43822	7
chr1	11906019	11906157	ALL_peaks_peak_513	78	.	6.05875	10.5485	7.80868	55
chr1	11925641	11925836	ALL_peaks_peak_514	184	.	9.84547	21.6995	18.4122	70
chr1	11954125	11954261	ALL_peaks_peak_515	255	.	12.1175	29.2288	25.5058	50
chr1	11967813	11968014	ALL_peaks_peak_516	292	.	11.8534	33.2436	29.2345	113
chr1	11968251	11968446	ALL_peaks_peak_517	65	.	5.09531	9.24056	6.58104	150
chr1	11968596	11968763	ALL_peaks_peak_518	35	.	3.90414	5.953	3.50243	43
chr1	11968962	11969126	ALL_peaks_peak_519	41	.	4.1632	6.66505	4.1731	124
chr1	12027299	12027651	ALL_peaks_peak_520	291	.	13.2535	33.1796	29.1749	136
chr1	12042208	12042274	ALL_peaks_peak_521	68	.	5.68008	9.55656	6.87133	27
chr1	12061721	12061847	ALL_peaks_peak_522	97	.	6.81609	12.6089	9.76383	62
chr1	12074460	12074526	ALL_peaks_peak_523	50	.	4.92273	7.65747	5.08577	36
chr1	12079255	12079562	ALL_peaks_peak_524	26	.	3.78672	5.05267	2.67471	135
chr1	12091469	12091545	ALL_peaks_peak_525	78	.	6.05875	10.5485	7.80868	37
chr1	12109758	12109997	ALL_peaks_peak_526	354	.	15.1469	40.0042	35.4361	64
chr1	12139814	12139929	ALL_peaks_peak_527	139	.	8.33078	17	13.9442	58
chr1	12167024	12167103	ALL_peaks_peak_528	78	.	6.05875	10.5485	7.80868	32
chr1	12173942	12174063	ALL_peaks_peak_529	68	.	5.68008	9.55656	6.87133	55
chr1	12178695	12178905	ALL_peaks_peak_530	242	.	11.7388	27.938	24.2983	161
chr1	12184784	12185250	ALL_peaks_peak_531	207	.	10.6028	24.1499	20.7324	248
chr1	12203770	12203837	ALL_peaks_peak_532	34	.	4.16539	5.88505	3.43822	18
chr1	12256509	12256953	ALL_peaks_peak_533	161	.	9.08812	19.3145	16.1467	369
chr1	12269045	12269328	ALL_peaks_peak_534	150	.	8.70945	18.1481	15.037	35
chr1	12289230	12289361	ALL_peaks_peak_535	61	.	5.24256	8.82464	6.18458	45
chr1	12289914	12290109	ALL_peaks_peak_536	105	.	6.8171	13.456	10.5766	90
chr1	12304308	12304400	ALL_peaks_peak_537	128	.	7.95211	15.8712	12.8691	33
chr1	12332197	12332397	ALL_peaks_peak_538	346	.	13.9091	39.1828	34.689	125
chr1	12335572	12335667	ALL_peaks_peak_539	67	.	5.41712	9.46307	6.79288	34
chr1	12336463	12336556	ALL_peaks_peak_540	78	.	5.86045	10.5865	7.84507	38
chr1	12374480	12374646	ALL_peaks_peak_541	255	.	12.1175	29.2288	25.5058	102
chr1	12399570	12399652	ALL_peaks_peak_542	59	.	5.3014	8.59228	5.96277	57
chr1	12467575	12467737	ALL_peaks_peak_543	139	.	8.33078	17	13.9442	63
chr1	12482702	12482779	ALL_peaks_peak_544	87	.	6.43742	11.5664	8.7735	23
chr1	12661337	12661485	ALL_peaks_peak_545	184	.	9.84547	21.6995	18.4122	78
chr1	12676009	12676115	ALL_peaks_peak_546	23	.	3.53582	4.65591	2.3252	61
chr1	12679919	12680310	ALL_peaks_peak_547	267	.	11.8235	30.6107	26.7952	122
chr1	12714220	12714286	ALL_peaks_peak_548	42	.	4.54406	6.75426	4.24317	29
chr1	12719064	12719421	ALL_peaks_peak_549	316	.	14.0108	35.875	31.6586	119
chr1	12820448	12820554	ALL_peaks_peak_550	139	.	8.33078	17	13.9442	50
chr1	12841580	12842092	ALL_peaks_peak_551	258	.	10.3087	29.5469	25.8053	265
chr1	12843810	12844181	ALL_peaks_peak_552	182	.	8.29099	21.5005	18.2295	307
chr1	12882498	12882679	ALL_peaks_peak_553	255	.	12.1175	29.2288	25.5058	72
chr1	12937093	12937258	ALL_peaks_peak_554	150	.	8.70945	18.1481	15.037	122
chr1	12981707	12981999	ALL_peaks_peak_555	193	.	9.76358	22.6692	19.3375	63
chr1	12984188	12984449	ALL_peaks_peak_556	166	.	8.80282	19.8598	16.6694	216
chr1	12996164	12996408	ALL_peaks_peak_557	316	.	14.0108	35.875	31.6586	108
chr1	13033135	13033201	ALL_peaks_peak_558	26	.	3.78672	5.05267	2.67471	35
chr1	13038605	13038750	ALL_peaks_peak_559	255	.	12.1175	29.2288	25.5058	88
chr1	13050450	13050621	ALL_peaks_peak_560	184	.	9.84547	21.6995	18.4122	48
chr1	13106568	13106744	ALL_peaks_peak_561	354	.	15.1469	40.0042	35.4361	38
chr1	13147113	13147254	ALL_peaks_peak_562	128	.	7.95211	15.8712	12.8691	33
chr1	13214425	13214579	ALL_peaks_peak_563	172	.	9.46679	20.4986	17.2718	68
chr1	13328465	13328550	ALL_peaks_peak_564	128	.	7.95211	15.8712	12.8691	46
chr1	13370800	13371002	ALL_peaks_peak_565	291	.	13.2535	33.1796	29.1749	164
chr1	13382766	13382919	ALL_peaks_peak_566	195	.	10.2241	22.9168	19.5656	51
chr1	13385313	13385482	ALL_peaks_peak_567	219	.	10.9815	25.3981	21.9106	49
chr1	13429972	13430158	ALL_peaks_peak_568	139	.	8.33078	17	13.9442	38
chr1	13460222	13460565	ALL_peaks_peak_569	236	.	10.3337	27.1998	23.6093	73
chr1	13462414	13462628	ALL_peaks_peak_570	315	.	12.1093	35.7126	31.5144	114
chr1	13474325	13474458	ALL_peaks_peak_571	139	.	8.33078	17	13.9442	44
chr1	13528272	13528414	ALL_peaks_peak_572	150	.	8.70945	18.1481	15.037	93
chr1	13650765	13650974	ALL_peaks_peak_573	118	.	7.57344	14.7624	11.8126	39
chr1	13681042	13681355	ALL_peaks_peak_574	188	.	9.20168	22.1986	18.8893	71
chr1	13683117	13683425	ALL_peaks_peak_575	261	.	11.12	29.9244	26.1591	247
chr1	13688214	13688281	ALL_peaks_peak_576	59	.	5.3014	8.59228	5.96277	24
chr1	13695165	13695233	ALL_peaks_peak_577	78	.	6.05875	10.5485	7.80868	35
chr1	13749140	13749315	ALL_peaks_peak_578	128	.	7.95211	15.8712	12.8691	85
chr1	13795919	13796034	ALL_peaks_peak_579	184	.	9.84547	21.6995	18.4122	64
chr1	13870552	13870739	ALL_peaks_peak_580	139	.	8.33078	17	13.9442	65
chr1	13897557	13897711	ALL_peaks_peak_581	97	.	6.81609	12.6089	9.76383	34
chr1	13992105	13992432	ALL_peaks_peak_582	279	.	12.8748	31.8499	27.9448	216
chr1	14024404	14024509	ALL_peaks_peak_583	87	.	6.43742	11.5664	8.7735	50
chr1	14030459	14030553	ALL_peaks_peak_584	97	.	6.81609	12.6089	9.76383	52
chr1	14041493	14041822	ALL_peaks_peak_585	219	.	10.9815	25.3981	21.9106	85
chr1	14052448	14052607	ALL_peaks_peak_586	316	.	14.0108	35.875	31.6586	78
chr1	14085677	14085833	ALL_peaks_peak_587	183	.	9.17251	21.5993	18.3237	65
chr1	14087523	14087722	ALL_peaks_peak_588	236	.	10.672	27.2399	23.6471	72
chr1	14115419	14115493	ALL_peaks_peak_589	59	.	5.3014	8.59228	5.96277	39
chr1	14133834	14133979	ALL_peaks_peak_590	207	.	10.6028	24.1499	20.7324	62
chr1	14137842	14137952	ALL_peaks_peak_591	139	.	8.33078	17	13.9442	29
chr1	14155303	14155605	ALL_peaks_peak_592	128	.	7.95211	15.8712	12.8691	226
chr1	14256799	14256921	ALL_peaks_peak_593	139	.	8.33078	17	13.9442	59
chr1	14277260	14277378	ALL_peaks_peak_594	195	.	10.2241	22.9168	19.5656	61
chr1	14286923	14287163	ALL_peaks_peak_595	291	.	13.2535	33.1796	29.1749	165
chr1	14292388	14292530	ALL_peaks_peak_596	59	.	5.3014	8.59228	5.96277	83
chr1	14421653	14421746	ALL_peaks_peak_597	68	.	5.68008	9.55656	6.87133	43
chr1	14440322	14440563	ALL_peaks_peak_598	184	.	9.84547	21.6995	18.4122	193
chr1	14476069	14476383	ALL_peaks_peak_599	230	.	11.3602	26.6609	23.099	106
chr1	14690732	14690798	ALL_peaks_peak_600	59	.	5.3014	8.59228	5.96277	44
chr1	14714251	14714362	ALL_peaks_peak_601	42	.	4.54406	6.75426	4.24317	62
chr1	14742034	14742102	ALL_peaks_peak_602	68	.	5.68008	9.55656	6.87133	26
chr1	14761906	14761983	ALL_peaks_peak_603	50	.	4.92273	7.65747	5.08577	38
chr1	14793749	14793815	ALL_peaks_peak_604	26	.	3.78672	5.05267	2.67471	7
chr1	14898499	14898573	ALL_peaks_peak_605	50	.	4.92273	7.65747	5.08577	25
chr1	14933292	14933424	ALL_peaks_peak_606	107	.	7.19476	13.6746	10.7774	55
chr1	14934802	14935037	ALL_peaks_peak_607	107	.	7.19476	13.6746	10.7774	191
chr1	15058496	15058876	ALL_peaks_peak_608	365	.	15.395	41.1705	36.5063	99
chr1	15105726	15105889	ALL_peaks_peak_609	172	.	9.46679	20.4986	17.2718	98
chr1	15109504	15109654	ALL_peaks_peak_610	59	.	5.3014	8.59228	5.96277	99
chr1	15109774	15109851	ALL_peaks_peak_611	68	.	5.68008	9.55656	6.87133	32
chr1	15131273	15131378	ALL_peaks_peak_612	87	.	6.43742	11.5664	8.7735	51
chr1	15160245	15160389	ALL_peaks_peak_613	118	.	7.57344	14.7624	11.8126	84
chr1	15177251	15177329	ALL_peaks_peak_614	107	.	7.19476	13.6746	10.7774	38
chr1	15241805	15242093	ALL_peaks_peak_615	218	.	10.9162	25.2841	21.81	230
chr1	15354127	15354296	ALL_peaks_peak_616	242	.	11.7388	27.938	24.2983	55
chr1	15364768	15364906	ALL_peaks_peak_617	118	.	7.57344	14.7624	11.8126	37
chr1	15373134	15373418	ALL_peaks_peak_618	207	.	10.6028	24.1499	20.7324	62
chr1	15389109	15389189	ALL_peaks_peak_619	87	.	6.43742	11.5664	8.7735	59
chr1	15391123	15391246	ALL_peaks_peak_620	107	.	7.19476	13.6746	10.7774	18
chr1	15427013	15427152	ALL_peaks_peak_621	184	.	9.84547	21.6995	18.4122	60
chr1	15437251	15437330	ALL_peaks_peak_622	78	.	6.05875	10.5485	7.80868	45
chr1	15437437	15437551	ALL_peaks_peak_623	59	.	5.3014	8.59228	5.96277	41
chr1	15454981	15455385	ALL_peaks_peak_624	207	.	10.6028	24.1499	20.7324	221
chr1	15468876	15468978	ALL_peaks_peak_625	118	.	7.57344	14.7624	11.8126	48
chr1	15478866	15479069	ALL_peaks_peak_626	201	.	9.90708	23.4919	20.1143	112
chr1	15480642	15480778	ALL_peaks_peak_627	69	.	5.51572	9.63202	6.94331	104
chr1	15486468	15486543	ALL_peaks_peak_628	34	.	4.16539	5.88505	3.43822	47
chr1	15526953	15527128	ALL_peaks_peak_629	128	.	7.95211	15.8712	12.8691	60
chr1	15527258	15527393	ALL_peaks_peak_630	34	.	4.16539	5.88505	3.43822	117
chr1	15530429	15530495	ALL_peaks_peak_631	50	.	4.92273	7.65747	5.08577	52
chr1	15556272	15556622	ALL_peaks_peak_632	97	.	6.81609	12.6089	9.76383	220
chr1	15569001	15569134	ALL_peaks_peak_633	139	.	8.33078	17	13.9442	68
chr1	15599125	15599495	ALL_peaks_peak_634	279	.	12.8748	31.8499	27.9448	93
chr1	15610134	15610262	ALL_peaks_peak_635	166	.	9.09422	19.8503	16.6605	65
chr1	15611535	15611760	ALL_peaks_peak_636	84	.	6.2592	11.2663	8.49619	55
chr1	15614726	15614856	ALL_peaks_peak_637	84	.	6.2592	11.2663	8.49619	40
chr1	15631341	15631617	ALL_peaks_peak_638	172	.	9.46679	20.4986	17.2718	56
chr1	15650105	15650276	ALL_peaks_peak_639	150	.	8.70945	18.1481	15.037	45
chr1	15650395	15650465	ALL_peaks_peak_640	50	.	4.92273	7.65747	5.08577	11
chr1	15757782	15758041	ALL_peaks_peak_641	107	.	7.19476	13.6746	10.7774	42
chr1	15828027	15828323	ALL_peaks_peak_642	219	.	10.9815	25.3981	21.9106	89
chr1	15852989	15853290	ALL_peaks_peak_643	97	.	6.56485	12.5937	9.75841	53
chr1	15911058	15911158	ALL_peaks_peak_644	128	.	7.95211	15.8712	12.8691	42
chr1	15921534	15921879	ALL_peaks_peak_645	240	.	11.5542	27.6139	24.0004	219
chr1	15923409	15923475	ALL_peaks_peak_646	55	.	5.05634	8.18706	5.58952	52
chr1	16067990	16068149	ALL_peaks_peak_647	207	.	10.6028	24.1499	20.7324	68
chr1	16118456	16118741	ALL_peaks_peak_648	116	.	7.20659	14.5794	11.646	233
chr1	16121683	16121804	ALL_peaks_peak_649	23	.	3.5524	4.68225	2.34964	57
chr1	16126954	16127095	ALL_peaks_peak_650	30	.	3.8894	5.44211	3.03931	35
chr1	16129992	16130129	ALL_peaks_peak_651	85	.	6.27445	11.292	8.52094	57
chr1	16142004	16142252	ALL_peaks_peak_652	172	.	9.46679	20.4986	17.2718	187
chr1	16156864	16156968	ALL_peaks_peak_653	139	.	8.33078	17	13.9442	43
chr1	16162318	16162546	ALL_peaks_peak_654	50	.	4.72941	7.63928	5.08103	188
chr1	16173746	16173815	ALL_peaks_peak_655	68	.	5.68008	9.55656	6.87133	16
chr1	16173980	16174113	ALL_peaks_peak_656	78	.	6.05875	10.5485	7.80868	82
chr1	16202986	16203263	ALL_peaks_peak_657	195	.	10.2241	22.9168	19.5656	168
chr1	16251326	16251470	ALL_peaks_peak_658	150	.	8.70945	18.1481	15.037	78
chr1	16284085	16284174	ALL_peaks_peak_659	150	.	8.70945	18.1481	15.037	56
chr1	16302578	16302662	ALL_peaks_peak_660	59	.	5.3014	8.59228	5.96277	37
chr1	16321173	16321463	ALL_peaks_peak_661	291	.	13.2535	33.1796	29.1749	40
chr1	16327385	16327461	ALL_peaks_peak_662	50	.	4.92273	7.65747	5.08577	20
chr1	16333716	16333919	ALL_peaks_peak_663	39	.	4.3237	6.3968	3.92052	109
chr1	16335418	16335779	ALL_peaks_peak_664	212	.	10.2719	24.7269	21.2808	263
chr1	16359369	16359598	ALL_peaks_peak_665	329	.	14.3895	37.2403	32.9119	130
chr1	16382650	16382855	ALL_peaks_peak_666	267	.	12.4962	30.5329	26.7222	122
chr1	16399590	16399664	ALL_peaks_peak_667	68	.	5.68008	9.55656	6.87133	43
chr1	16405338	16405865	ALL_peaks_peak_668	314	.	11.7281	35.5973	31.408	206
chr1	16408747	16408813	ALL_peaks_peak_669	33	.	3.82826	5.82156	3.39433	23
chr1	16408929	16409040	ALL_peaks_peak_670	145	.	7.59745	17.6274	14.546	61
chr1	16447632	16447971	ALL_peaks_peak_671	150	.	8.70945	18.1481	15.037	65
chr1	16481073	16481449	ALL_peaks_peak_672	154	.	8.6474	18.5487	15.4214	265
chr1	16481615	16481691	ALL_peaks_peak_673	38	.	4.28296	6.33034	3.85819	49
chr1	16514050	16514660	ALL_peaks_peak_674	171	.	9.3872	20.3607	17.1479	453
chr1	16531622	16531706	ALL_peaks_peak_675	97	.	6.81609	12.6089	9.76383	46
chr1	16533116	16533290	ALL_peaks_peak_676	118	.	7.57344	14.7624	11.8126	130
chr1	16543996	16544098	ALL_peaks_peak_677	59	.	5.3014	8.59228	5.96277	45
chr1	16562591	16563170	ALL_peaks_peak_678	216	.	10.4851	25.1113	21.6461	235
chr1	16571008	16571180	ALL_peaks_peak_679	304	.	13.6322	34.5214	30.4131	67
chr1	16616617	16616722	ALL_peaks_peak_680	172	.	9.46679	20.4986	17.2718	53
chr1	16659540	16659640	ALL_peaks_peak_681	59	.	5.3014	8.59228	5.96277	55
chr1	16661299	16661365	ALL_peaks_peak_682	50	.	4.92273	7.65747	5.08577	33
chr1	16679064	16679130	ALL_peaks_peak_683	50	.	4.92273	7.65747	5.08577	45
chr1	16689829	16689895	ALL_peaks_peak_684	33	.	3.93959	5.76469	3.34088	29
chr1	16689992	16690213	ALL_peaks_peak_685	248	.	11.0426	28.5395	24.8657	55
chr1	16693466	16693667	ALL_peaks_peak_686	78	.	5.61728	10.5313	7.80234	139
chr1	16766670	16767205	ALL_peaks_peak_687	198	.	10.0647	23.2052	19.8408	442
chr1	16801569	16801665	ALL_peaks_peak_688	128	.	7.95211	15.8712	12.8691	37
chr1	16830172	16830382	ALL_peaks_peak_689	95	.	6.22859	12.4065	9.57909	34
chr1	16839866	16840162	ALL_peaks_peak_690	53	.	3.84968	7.92022	5.33592	198
chr1	16840517	16840626	ALL_peaks_peak_691	61	.	4.11769	8.81594	6.17642	70
chr1	16854197	16854321	ALL_peaks_peak_692	230	.	11.0124	26.6528	23.099	82
chr1	16872092	16872456	ALL_peaks_peak_693	132	.	6.90498	16.2742	13.2561	132
chr1	16875037	16875174	ALL_peaks_peak_694	140	.	7.07139	17.0658	14.0072	44
chr1	16891909	16892043	ALL_peaks_peak_695	20	.	2.70416	4.4056	2.09321	34
chr1	16892607	16892792	ALL_peaks_peak_696	31	.	3.05761	5.59447	3.18203	27
chr1	16893389	16893505	ALL_peaks_peak_697	13	.	2.44244	3.5199	1.30724	20
chr1	16893621	16893727	ALL_peaks_peak_698	55	.	3.7491	8.19715	5.59917	52
chr1	16894715	16894794	ALL_peaks_peak_699	33	.	3.15478	5.82532	3.39771	27
chr1	16900650	16900728	ALL_peaks_peak_700	20	.	3.14284	4.40068	2.0888	23
chr1	16905673	16905759	ALL_peaks_peak_701	123	.	6.6394	15.2991	12.3286	51
chr1	16911926	16912058	ALL_peaks_peak_702	117	.	6.53417	14.6567	11.7198	109
chr1	16918197	16918536	ALL_peaks_peak_703	340	.	9.99593	38.4808	34.0523	244
chr1	16934786	16935031	ALL_peaks_peak_704	118	.	5.5062	14.8426	11.89	115
chr1	16940065	16940152	ALL_peaks_peak_705	51	.	3.88244	7.73065	5.15524	44
chr1	16947582	16947977	ALL_peaks_peak_706	327	.	8.86222	37.0323	32.7258	113
chr1	16951469	16951665	ALL_peaks_peak_707	280	.	8.06827	31.9525	28.0412	104
chr1	16971229	16971560	ALL_peaks_peak_708	69	.	4.62128	9.63207	6.94332	269
chr1	16978339	16978480	ALL_peaks_peak_709	233	.	8.36632	26.9398	23.3631	56
chr1	16983208	16983274	ALL_peaks_peak_710	50	.	4.0796	7.60865	5.05224	19
chr1	16992551	16992617	ALL_peaks_peak_711	29	.	3.34463	5.39243	2.99305	49
chr1	16992806	16993022	ALL_peaks_peak_712	49	.	4.01947	7.48575	4.93599	141
chr1	16993661	16993889	ALL_peaks_peak_713	142	.	6.54479	17.2966	14.229	120
chr1	17004611	17004768	ALL_peaks_peak_714	100	.	6.28178	12.912	10.0549	68
chr1	17007380	17007523	ALL_peaks_peak_715	174	.	7.91382	20.7266	17.4902	60
chr1	17011225	17011550	ALL_peaks_peak_716	252	.	10.3335	28.9953	25.2937	216
chr1	17023154	17023300	ALL_peaks_peak_717	101	.	6.79737	12.996	10.1356	56
chr1	17029785	17030110	ALL_peaks_peak_718	138	.	7.20821	16.8742	13.8316	40
chr1	17036071	17036547	ALL_peaks_peak_719	181	.	7.30933	21.3654	18.101	355
chr1	17038728	17038812	ALL_peaks_peak_720	65	.	4.4345	9.23107	6.57201	35
chr1	17053834	17054109	ALL_peaks_peak_721	98	.	5.77425	12.7331	9.88305	123
chr1	17066460	17066790	ALL_peaks_peak_722	97	.	5.33869	12.5697	9.7353	224
chr1	17067494	17067817	ALL_peaks_peak_723	93	.	5.3357	12.1952	9.37676	113
chr1	17074835	17075065	ALL_peaks_peak_724	70	.	5.01955	9.77782	7.08274	194
chr1	17077140	17077290	ALL_peaks_peak_725	78	.	4.89106	10.5348	7.80574	58
chr1	17081966	17082148	ALL_peaks_peak_726	278	.	9.92384	31.7126	27.8251	92
chr1	17084235	17084307	ALL_peaks_peak_727	60	.	4.60287	8.64719	6.01522	32
chr1	17185772	17186049	ALL_peaks_peak_728	231	.	10.0908	26.7311	23.1655	65
chr1	17188460	17188818	ALL_peaks_peak_729	96	.	6.03171	12.445	9.61606	242
chr1	17199722	17199788	ALL_peaks_peak_730	38	.	4.12489	6.33125	3.85889	55
chr1	17206577	17206664	ALL_peaks_peak_731	132	.	7.90798	16.2698	13.252	33
chr1	17222688	17223153	ALL_peaks_peak_732	103	.	6.02378	13.2331	10.363	173
chr1	17224349	17224426	ALL_peaks_peak_733	52	.	4.31801	7.7957	5.2173	20
chr1	17231375	17231536	ALL_peaks_peak_734	150	.	7.37152	18.1421	15.037	65
chr1	17236391	17236561	ALL_peaks_peak_735	125	.	6.99953	15.5539	12.573	87
chr1	17274134	17274239	ALL_peaks_peak_736	104	.	6.74127	13.3226	10.4486	43
chr1	17278134	17278428	ALL_peaks_peak_737	271	.	11.6671	30.9588	27.1206	237
chr1	17287266	17287417	ALL_peaks_peak_738	150	.	8.70945	18.1481	15.037	62
chr1	17289883	17290178	ALL_peaks_peak_739	86	.	6.33619	11.3962	8.62058	262
chr1	17372696	17373000	ALL_peaks_peak_740	329	.	14.3895	37.2403	32.9119	78
chr1	17380632	17380876	ALL_peaks_peak_741	107	.	7.19476	13.6746	10.7774	62
chr1	17386096	17386397	ALL_peaks_peak_742	279	.	12.8748	31.8499	27.9448	218
chr1	17402065	17402144	ALL_peaks_peak_743	87	.	6.43742	11.5664	8.7735	49
chr1	17452252	17452515	ALL_peaks_peak_744	235	.	11.304	27.1719	23.5827	185
chr1	17504680	17504835	ALL_peaks_peak_745	87	.	6.43742	11.5664	8.7735	112
chr1	17563403	17564101	ALL_peaks_peak_746	205	.	9.24375	23.9356	20.5361	334
chr1	17565997	17566085	ALL_peaks_peak_747	99	.	6.19615	12.753	9.90213	43
chr1	17600826	17600969	ALL_peaks_peak_748	207	.	10.6028	24.1499	20.7324	60
chr1	17662719	17662894	ALL_peaks_peak_749	279	.	12.8748	31.8499	27.9448	53
chr1	17697191	17697352	ALL_peaks_peak_750	392	.	16.2829	44.2298	39.2965	87
chr1	17703963	17704105	ALL_peaks_peak_751	50	.	4.92273	7.65747	5.08577	127
chr1	17732637	17733150	ALL_peaks_peak_752	192	.	10.0141	22.5507	19.2248	194
chr1	17733420	17733490	ALL_peaks_peak_753	58	.	5.20524	8.43374	5.82366	16
chr1	17738750	17738961	ALL_peaks_peak_754	68	.	5.68008	9.55656	6.87133	100
chr1	17766524	17766683	ALL_peaks_peak_755	32	.	3.88903	5.68046	3.26241	22
chr1	17768039	17768406	ALL_peaks_peak_756	133	.	7.71812	16.4118	13.3882	310
chr1	17783969	17784037	ALL_peaks_peak_757	50	.	4.92273	7.65747	5.08577	42
chr1	17802338	17802527	ALL_peaks_peak_758	61	.	5.23049	8.80424	6.16497	128
chr1	17803799	17804103	ALL_peaks_peak_759	203	.	10.02	23.6956	20.3076	241
chr1	17811904	17812079	ALL_peaks_peak_760	150	.	8.70945	18.1481	15.037	64
chr1	17820791	17821170	ALL_peaks_peak_761	275	.	12.6413	31.4378	27.5687	53
chr1	17828742	17829076	ALL_peaks_peak_762	221	.	10.8093	25.6903	22.1873	253
chr1	17834545	17834660	ALL_peaks_peak_763	172	.	9.46679	20.4986	17.2718	58
chr1	17846696	17846826	ALL_peaks_peak_764	42	.	4.54406	6.75426	4.24317	53
chr1	17899306	17899423	ALL_peaks_peak_765	50	.	4.92273	7.65747	5.08577	39
chr1	17933425	17933743	ALL_peaks_peak_766	195	.	10.2241	22.9168	19.5656	102
chr1	17956073	17956141	ALL_peaks_peak_767	59	.	5.3014	8.59228	5.96277	27
chr1	17980372	17980500	ALL_peaks_peak_768	161	.	9.08812	19.3145	16.1467	73
chr1	17988029	17988331	ALL_peaks_peak_769	207	.	10.6028	24.1499	20.7324	229
chr1	18023066	18023318	ALL_peaks_peak_770	172	.	9.46679	20.4986	17.2718	47
chr1	18052843	18052909	ALL_peaks_peak_771	50	.	4.92273	7.65747	5.08577	49
chr1	18141396	18141462	ALL_peaks_peak_772	50	.	4.92273	7.65747	5.08577	12
chr1	18152751	18152890	ALL_peaks_peak_773	78	.	6.05875	10.5485	7.80868	31
chr1	18158340	18158406	ALL_peaks_peak_774	50	.	4.92273	7.65747	5.08577	46
chr1	18208327	18208667	ALL_peaks_peak_775	139	.	8.33078	17	13.9442	150
chr1	18236255	18236435	ALL_peaks_peak_776	118	.	7.57344	14.7624	11.8126	86
chr1	18246074	18246642	ALL_peaks_peak_777	171	.	9.3872	20.3607	17.1479	440
chr1	18249462	18249594	ALL_peaks_peak_778	94	.	6.61133	12.2621	9.44086	48
chr1	18269559	18269645	ALL_peaks_peak_779	68	.	5.68008	9.55656	6.87133	50
chr1	18311091	18311228	ALL_peaks_peak_780	107	.	7.19476	13.6746	10.7774	77
chr1	18325479	18325610	ALL_peaks_peak_781	128	.	7.95211	15.8712	12.8691	69
chr1	18368336	18368416	ALL_peaks_peak_782	68	.	5.68008	9.55656	6.87133	43
chr1	18427083	18427417	ALL_peaks_peak_783	242	.	11.7388	27.938	24.2983	86
chr1	18436854	18437032	ALL_peaks_peak_784	139	.	8.33078	17	13.9442	46
chr1	18475653	18475782	ALL_peaks_peak_785	78	.	6.05875	10.5485	7.80868	65
chr1	18523954	18524227	ALL_peaks_peak_786	161	.	9.08812	19.3145	16.1467	60
chr1	18544040	18544165	ALL_peaks_peak_787	97	.	6.81609	12.6089	9.76383	52
chr1	18558718	18558891	ALL_peaks_peak_788	39	.	4.36522	6.46441	3.98429	41
chr1	18561360	18561743	ALL_peaks_peak_789	301	.	13.0825	34.2165	30.1369	175
chr1	18573143	18573299	ALL_peaks_peak_790	150	.	8.70945	18.1481	15.037	85
chr1	18582961	18583054	ALL_peaks_peak_791	68	.	5.68008	9.55656	6.87133	63
chr1	18615774	18615913	ALL_peaks_peak_792	78	.	6.05875	10.5485	7.80868	91
chr1	18616228	18616353	ALL_peaks_peak_793	68	.	5.68008	9.55656	6.87133	72
chr1	18625979	18626645	ALL_peaks_peak_794	111	.	6.9394	14.1062	11.1921	425
chr1	18645789	18645901	ALL_peaks_peak_795	107	.	7.19476	13.6746	10.7774	46
chr1	18649094	18649179	ALL_peaks_peak_796	87	.	6.43742	11.5664	8.7735	33
chr1	18650864	18650974	ALL_peaks_peak_797	78	.	6.05875	10.5485	7.80868	50
chr1	18686272	18686403	ALL_peaks_peak_798	87	.	6.43742	11.5664	8.7735	31
chr1	18700543	18700685	ALL_peaks_peak_799	97	.	6.81609	12.6089	9.76383	23
chr1	18725633	18725799	ALL_peaks_peak_800	42	.	4.54406	6.75426	4.24317	67
chr1	18743928	18744053	ALL_peaks_peak_801	50	.	4.92273	7.65747	5.08577	62
chr1	18791325	18791472	ALL_peaks_peak_802	26	.	3.78672	5.05267	2.67471	97
chr1	18795204	18795323	ALL_peaks_peak_803	107	.	7.19476	13.6746	10.7774	59
chr1	18812834	18813012	ALL_peaks_peak_804	118	.	7.57344	14.7624	11.8126	61
chr1	18857584	18857715	ALL_peaks_peak_805	97	.	6.81609	12.6089	9.76383	47
chr1	18882938	18883122	ALL_peaks_peak_806	317	.	13.6592	35.9377	31.7171	120
chr1	18887275	18887440	ALL_peaks_peak_807	168	.	9.1824	20.0045	16.8076	56
chr1	18902227	18902313	ALL_peaks_peak_808	59	.	5.3014	8.59228	5.96277	46
chr1	18908024	18908351	ALL_peaks_peak_809	87	.	6.43742	11.5664	8.7735	65
chr1	18911294	18911539	ALL_peaks_peak_810	204	.	10.4105	23.814	20.4202	130
chr1	18920443	18920510	ALL_peaks_peak_811	68	.	5.68008	9.55656	6.87133	43
chr1	18923983	18924330	ALL_peaks_peak_812	149	.	8.67924	18.0961	14.995	123
chr1	18934998	18935452	ALL_peaks_peak_813	184	.	9.84547	21.6995	18.4122	267
chr1	19000598	19000733	ALL_peaks_peak_814	150	.	8.70945	18.1481	15.037	54
chr1	19008002	19008194	ALL_peaks_peak_815	230	.	11.3602	26.6609	23.099	74
chr1	19069933	19070018	ALL_peaks_peak_816	128	.	7.95211	15.8712	12.8691	40
chr1	19121194	19121329	ALL_peaks_peak_817	68	.	5.68008	9.55656	6.87133	20
chr1	19147381	19147680	ALL_peaks_peak_818	150	.	8.70945	18.1481	15.037	64
chr1	19201791	19202011	ALL_peaks_peak_819	230	.	11.3602	26.6609	23.099	120
chr1	19210587	19210886	ALL_peaks_peak_820	128	.	7.95211	15.8712	12.8691	214
chr1	19229335	19229569	ALL_peaks_peak_821	89	.	5.85549	11.722	8.92273	115
chr1	19229764	19229988	ALL_peaks_peak_822	47	.	4.37471	7.31972	4.77898	49
chr1	19233377	19233869	ALL_peaks_peak_823	154	.	7.81431	18.5312	15.4049	259
chr1	19239640	19239905	ALL_peaks_peak_824	219	.	10.9815	25.3981	21.9106	50
chr1	19240995	19241083	ALL_peaks_peak_825	49	.	4.80983	7.47288	4.92367	23
chr1	19248166	19248234	ALL_peaks_peak_826	59	.	5.3014	8.59228	5.96277	40
chr1	19299128	19299283	ALL_peaks_peak_827	97	.	6.81609	12.6089	9.76383	32
chr1	19337662	19337904	ALL_peaks_peak_828	97	.	6.81609	12.6089	9.76383	112
chr1	19338928	19339012	ALL_peaks_peak_829	87	.	6.43742	11.5664	8.7735	38
chr1	19422805	19423134	ALL_peaks_peak_830	219	.	10.9815	25.3981	21.9106	112
chr1	19423635	19423701	ALL_peaks_peak_831	59	.	5.3014	8.59228	5.96277	28
chr1	19440247	19440398	ALL_peaks_peak_832	242	.	11.7388	27.938	24.2983	50
chr1	19506144	19506275	ALL_peaks_peak_833	291	.	13.2535	33.1796	29.1749	85
chr1	19567859	19568044	ALL_peaks_peak_834	354	.	15.1469	40.0042	35.4361	80
chr1	19668091	19668254	ALL_peaks_peak_835	181	.	9.66687	21.389	18.1232	82
chr1	19670794	19671053	ALL_peaks_peak_836	78	.	6.05875	10.5485	7.80868	203
chr1	19700960	19701042	ALL_peaks_peak_837	128	.	7.95211	15.8712	12.8691	26
chr1	19717775	19718205	ALL_peaks_peak_838	195	.	10.2241	22.9168	19.5656	235
chr1	19731859	19731925	ALL_peaks_peak_839	42	.	4.54406	6.75426	4.24317	16
chr1	19767040	19767153	ALL_peaks_peak_840	34	.	4.16539	5.88505	3.43822	65
chr1	19772353	19772446	ALL_peaks_peak_841	184	.	9.84547	21.6995	18.4122	52
chr1	19814179	19814618	ALL_peaks_peak_842	196	.	9.92345	22.9545	19.6016	214
chr1	19908865	19909193	ALL_peaks_peak_843	279	.	12.8748	31.8499	27.9448	64
chr1	19967198	19967461	ALL_peaks_peak_844	143	.	8.26743	17.3821	14.3109	182
chr1	19969666	19969883	ALL_peaks_peak_845	191	.	9.94109	22.4229	19.103	57
chr1	19975306	19975439	ALL_peaks_peak_846	78	.	6.05875	10.5485	7.80868	47
chr1	19977791	19977889	ALL_peaks_peak_847	40	.	4.23122	6.51142	4.0284	60
chr1	19980149	19980607	ALL_peaks_peak_848	345	.	13.8486	39.0695	34.5857	207
chr1	19986265	19986561	ALL_peaks_peak_849	197	.	9.11122	23.1246	19.7638	241
chr1	19988294	19988616	ALL_peaks_peak_850	157	.	7.99763	18.8826	15.7414	113
chr1	20031153	20031432	ALL_peaks_peak_851	279	.	12.8748	31.8499	27.9448	60
chr1	20042134	20042511	ALL_peaks_peak_852	361	.	14.7814	40.7922	36.1601	150
chr1	20063449	20063524	ALL_peaks_peak_853	42	.	4.54406	6.75426	4.24317	34
chr1	20088637	20088914	ALL_peaks_peak_854	118	.	7.57344	14.7624	11.8126	215
chr1	20112355	20112421	ALL_peaks_peak_855	78	.	6.05875	10.5485	7.80868	40
chr1	20126093	20126177	ALL_peaks_peak_856	97	.	6.81609	12.6089	9.76383	50
chr1	20137836	20138011	ALL_peaks_peak_857	195	.	10.2241	22.9168	19.5656	62
chr1	20198752	20199018	ALL_peaks_peak_858	118	.	7.57344	14.7624	11.8126	65
chr1	20204862	20204966	ALL_peaks_peak_859	103	.	6.66711	13.1916	10.3234	51
chr1	20208631	20209003	ALL_peaks_peak_860	297	.	12.5025	33.8198	29.7701	114
chr1	20244462	20244765	ALL_peaks_peak_861	291	.	13.2535	33.1796	29.1749	227
chr1	20284442	20284526	ALL_peaks_peak_862	97	.	6.81609	12.6089	9.76383	43
chr1	20301205	20301660	ALL_peaks_peak_863	372	.	15.4639	42.0255	37.2886	247
chr1	20307089	20307222	ALL_peaks_peak_864	34	.	4.16539	5.88505	3.43822	86
chr1	20414281	20414423	ALL_peaks_peak_865	118	.	7.57344	14.7624	11.8126	91
chr1	20415840	20416014	ALL_peaks_peak_866	207	.	10.6028	24.1499	20.7324	93
chr1	20427344	20427699	ALL_peaks_peak_867	207	.	10.6028	24.1499	20.7324	244
chr1	20478860	20479128	ALL_peaks_peak_868	118	.	7.57344	14.7624	11.8126	149
chr1	20479769	20479859	ALL_peaks_peak_869	50	.	4.92273	7.65747	5.08577	37
chr1	20492051	20492132	ALL_peaks_peak_870	78	.	6.05875	10.5485	7.80868	24
chr1	20521772	20521957	ALL_peaks_peak_871	172	.	9.46679	20.4986	17.2718	74
chr1	20539277	20539737	ALL_peaks_peak_872	126	.	7.26744	15.5972	12.6145	269
chr1	20543238	20543403	ALL_peaks_peak_873	346	.	13.5305	39.1685	34.6762	78
chr1	20559393	20559515	ALL_peaks_peak_874	34	.	4.16539	5.88505	3.43822	97
chr1	20559960	20560095	ALL_peaks_peak_875	219	.	10.9815	25.3981	21.9106	60
chr1	20578615	20578691	ALL_peaks_peak_876	107	.	7.19476	13.6746	10.7774	28
chr1	20662771	20662837	ALL_peaks_peak_877	59	.	5.3014	8.59228	5.96277	36
chr1	20688407	20688542	ALL_peaks_peak_878	184	.	9.84547	21.6995	18.4122	71
chr1	20693609	20693863	ALL_peaks_peak_879	161	.	9.08812	19.3145	16.1467	191
chr1	20703473	20703622	ALL_peaks_peak_880	230	.	11.3602	26.6609	23.099	93
chr1	20757048	20757187	ALL_peaks_peak_881	87	.	6.43742	11.5664	8.7735	50
chr1	20760670	20760782	ALL_peaks_peak_882	87	.	6.43742	11.5664	8.7735	57
chr1	20796026	20796125	ALL_peaks_peak_883	118	.	7.57344	14.7624	11.8126	39
chr1	20820383	20820587	ALL_peaks_peak_884	279	.	12.8748	31.8499	27.9448	97
chr1	20838460	20838581	ALL_peaks_peak_885	26	.	3.78672	5.05267	2.67471	113
chr1	20848695	20849061	ALL_peaks_peak_886	195	.	10.2241	22.9168	19.5656	273
chr1	20849159	20849230	ALL_peaks_peak_887	42	.	4.53961	6.74707	4.24317	59
chr1	20857558	20857813	ALL_peaks_peak_888	161	.	9.08812	19.3145	16.1467	111
chr1	20865370	20865436	ALL_peaks_peak_889	34	.	4.16539	5.88505	3.43822	16
chr1	20901823	20901999	ALL_peaks_peak_890	195	.	10.2241	22.9168	19.5656	101
chr1	20940380	20940618	ALL_peaks_peak_891	42	.	4.54406	6.75426	4.24317	192
chr1	20959853	20960183	ALL_peaks_peak_892	115	.	7.39973	14.4658	11.5368	55
chr1	20960350	20960529	ALL_peaks_peak_893	87	.	6.41509	11.5289	8.74733	56
chr1	20966757	20967042	ALL_peaks_peak_894	230	.	11.3602	26.6609	23.099	59
chr1	20987917	20988174	ALL_peaks_peak_895	161	.	9.08812	19.3145	16.1467	118
chr1	21022879	21023581	ALL_peaks_peak_896	234	.	10.5371	26.9878	23.4086	530
chr1	21029050	21029154	ALL_peaks_peak_897	195	.	10.2241	22.9168	19.5656	54
chr1	21059617	21059811	ALL_peaks_peak_898	184	.	9.84547	21.6995	18.4122	114
chr1	21211888	21211988	ALL_peaks_peak_899	107	.	7.19476	13.6746	10.7774	50
chr1	21223426	21223537	ALL_peaks_peak_900	42	.	4.54406	6.75426	4.24317	60
chr1	21225809	21225879	ALL_peaks_peak_901	68	.	5.68008	9.55656	6.87133	40
chr1	21230046	21230156	ALL_peaks_peak_902	68	.	5.68008	9.55656	6.87133	45
chr1	21308497	21308670	ALL_peaks_peak_903	184	.	9.84547	21.6995	18.4122	107
chr1	21390735	21391315	ALL_peaks_peak_904	128	.	7.95211	15.8712	12.8691	163
chr1	21521751	21521960	ALL_peaks_peak_905	230	.	11.3602	26.6609	23.099	127
chr1	21537014	21537089	ALL_peaks_peak_906	68	.	5.68008	9.55656	6.87133	25
chr1	21543299	21543579	ALL_peaks_peak_907	207	.	10.6028	24.1499	20.7324	225
chr1	21558425	21558726	ALL_peaks_peak_908	291	.	13.2535	33.1796	29.1749	227
chr1	21571618	21571687	ALL_peaks_peak_909	59	.	5.3014	8.59228	5.96277	29
chr1	21578373	21578652	ALL_peaks_peak_910	48	.	4.60617	7.43025	4.88352	118
chr1	21581637	21582007	ALL_peaks_peak_911	293	.	12.6116	33.3587	29.3415	266
chr1	21596790	21596994	ALL_peaks_peak_912	150	.	8.70945	18.1481	15.037	168
chr1	21661332	21661423	ALL_peaks_peak_913	172	.	9.46679	20.4986	17.2718	34
chr1	21662466	21662575	ALL_peaks_peak_914	50	.	4.92273	7.65747	5.08577	60
chr1	21694967	21695267	ALL_peaks_peak_915	219	.	10.0484	25.4794	21.9878	224
chr1	21697126	21697273	ALL_peaks_peak_916	178	.	8.90302	21.1025	17.8498	58
chr1	21766455	21766659	ALL_peaks_peak_917	59	.	5.3014	8.59228	5.96277	184
chr1	21794488	21794611	ALL_peaks_peak_918	38	.	4.2729	6.3139	3.84258	22
chr1	21795252	21795392	ALL_peaks_peak_919	215	.	10.7559	25.0031	21.5432	44
chr1	21817461	21817538	ALL_peaks_peak_920	78	.	6.05875	10.5485	7.80868	31
chr1	21837840	21837946	ALL_peaks_peak_921	139	.	8.33078	17	13.9442	47
chr1	21861412	21861618	ALL_peaks_peak_922	230	.	11.3602	26.6609	23.099	104
chr1	21866498	21866593	ALL_peaks_peak_923	107	.	7.19476	13.6746	10.7774	59
chr1	21900677	21900836	ALL_peaks_peak_924	161	.	9.08812	19.3145	16.1467	37
chr1	21922167	21922316	ALL_peaks_peak_925	59	.	5.3014	8.59228	5.96277	128
chr1	21934337	21934598	ALL_peaks_peak_926	150	.	8.70945	18.1481	15.037	142
chr1	21960687	21960861	ALL_peaks_peak_927	75	.	5.90537	10.2918	7.57382	60
chr1	21961218	21961552	ALL_peaks_peak_928	58	.	5.20524	8.43374	5.82366	97
chr1	21982321	21982515	ALL_peaks_peak_929	153	.	8.33389	18.4998	15.3749	59
chr1	21985659	21985998	ALL_peaks_peak_930	124	.	7.44854	15.4624	12.4851	211
chr1	22029205	22029271	ALL_peaks_peak_931	58	.	5.21804	8.45488	5.84382	28
chr1	22029751	22030077	ALL_peaks_peak_932	227	.	11.1541	26.2996	22.765	226
chr1	22192613	22192720	ALL_peaks_peak_933	118	.	7.57344	14.7624	11.8126	52
chr1	22208775	22208889	ALL_peaks_peak_934	97	.	6.81609	12.6089	9.76383	33
chr1	22266236	22266389	ALL_peaks_peak_935	97	.	6.81609	12.6089	9.76383	45
chr1	22290442	22290756	ALL_peaks_peak_936	406	.	16.6616	45.6585	40.6137	202
chr1	22307172	22307321	ALL_peaks_peak_937	195	.	10.2241	22.9168	19.5656	54
chr1	22308702	22308774	ALL_peaks_peak_938	68	.	5.68008	9.55656	6.87133	38
chr1	22331796	22331952	ALL_peaks_peak_939	184	.	9.84547	21.6995	18.4122	61
chr1	22349444	22349627	ALL_peaks_peak_940	381	.	14.7735	42.9559	38.1346	78
chr1	22351869	22351986	ALL_peaks_peak_941	42	.	4.3916	6.78091	4.2685	31
chr1	22366175	22366258	ALL_peaks_peak_942	87	.	6.43742	11.5664	8.7735	31
chr1	22432051	22432380	ALL_peaks_peak_943	361	.	15.1694	40.7683	36.1378	270
chr1	22458358	22458747	ALL_peaks_peak_944	87	.	6.43742	11.5664	8.7735	240
chr1	22498912	22499022	ALL_peaks_peak_945	42	.	4.54406	6.75426	4.24317	46
chr1	22534909	22535014	ALL_peaks_peak_946	230	.	11.3602	26.6609	23.099	44
chr1	22552835	22552905	ALL_peaks_peak_947	50	.	4.92273	7.65747	5.08577	17
chr1	22564304	22564434	ALL_peaks_peak_948	139	.	8.33078	17	13.9442	56
chr1	22586460	22586589	ALL_peaks_peak_949	34	.	4.16539	5.88505	3.43822	37
chr1	22601757	22602113	ALL_peaks_peak_950	153	.	8.31559	18.4668	15.343	129
chr1	22602430	22602740	ALL_peaks_peak_951	204	.	9.80649	23.8772	20.4802	92
chr1	22643912	22644014	ALL_peaks_peak_952	128	.	7.95211	15.8712	12.8691	57
chr1	22675051	22675141	ALL_peaks_peak_953	59	.	5.3014	8.59228	5.96277	32
chr1	22739175	22739338	ALL_peaks_peak_954	64	.	5.21887	9.12055	6.46658	97
chr1	22740787	22740989	ALL_peaks_peak_955	80	.	5.78406	10.8282	8.0768	89
chr1	22743223	22743483	ALL_peaks_peak_956	65	.	4.90945	9.23258	6.57342	41
chr1	22746902	22747210	ALL_peaks_peak_957	165	.	8.7442	19.7542	16.5682	214
chr1	22755241	22755340	ALL_peaks_peak_958	42	.	4.54406	6.75426	4.24317	35
chr1	22778191	22778292	ALL_peaks_peak_959	26	.	3.78672	5.05267	2.67471	30
chr1	22815930	22816012	ALL_peaks_peak_960	97	.	6.81609	12.6089	9.76383	28
chr1	22854484	22854629	ALL_peaks_peak_961	128	.	7.95211	15.8712	12.8691	98
chr1	22886597	22886668	ALL_peaks_peak_962	59	.	5.3014	8.59228	5.96277	38
chr1	22955765	22955871	ALL_peaks_peak_963	42	.	4.54406	6.75426	4.24317	47
chr1	22968678	22968769	ALL_peaks_peak_964	34	.	4.16539	5.88505	3.43822	62
chr1	22981057	22981311	ALL_peaks_peak_965	230	.	11.3602	26.6609	23.099	199
chr1	22984983	22985107	ALL_peaks_peak_966	113	.	7.31048	14.3127	11.3902	65
chr1	22988990	22989120	ALL_peaks_peak_967	50	.	4.92273	7.65747	5.08577	39
chr1	22992337	22992488	ALL_peaks_peak_968	97	.	6.81609	12.6089	9.76383	103
chr1	23000565	23000919	ALL_peaks_peak_969	267	.	12.4962	30.5329	26.7222	250
chr1	23031062	23031210	ALL_peaks_peak_970	255	.	12.1175	29.2288	25.5058	83
chr1	23035892	23035967	ALL_peaks_peak_971	78	.	6.05875	10.5485	7.80868	23
chr1	23077775	23077893	ALL_peaks_peak_972	107	.	7.19476	13.6746	10.7774	58
chr1	23124747	23124818	ALL_peaks_peak_973	68	.	5.68008	9.55656	6.87133	39
chr1	23145657	23145723	ALL_peaks_peak_974	34	.	4.16539	5.88505	3.43822	21
chr1	23156972	23157040	ALL_peaks_peak_975	78	.	6.05875	10.5485	7.80868	30
chr1	23161424	23161524	ALL_peaks_peak_976	68	.	5.68008	9.55656	6.87133	63
chr1	23188697	23188998	ALL_peaks_peak_977	172	.	9.46679	20.4986	17.2718	75
chr1	23215832	23215980	ALL_peaks_peak_978	267	.	12.4962	30.5329	26.7222	86
chr1	23256908	23257244	ALL_peaks_peak_979	87	.	6.43742	11.5664	8.7735	82
chr1	23290693	23291102	ALL_peaks_peak_980	279	.	12.8748	31.8499	27.9448	169
chr1	23302988	23303444	ALL_peaks_peak_981	328	.	13.6036	37.2177	32.8971	126
chr1	23345766	23345916	ALL_peaks_peak_982	139	.	8.33078	17	13.9442	58
chr1	23407993	23408152	ALL_peaks_peak_983	230	.	11.3602	26.6609	23.099	73
chr1	23425288	23425480	ALL_peaks_peak_984	184	.	9.84547	21.6995	18.4122	118
chr1	23505566	23505843	ALL_peaks_peak_985	195	.	10.2141	22.8994	19.5566	52
chr1	23510948	23511566	ALL_peaks_peak_986	148	.	8.59363	17.9485	14.8539	393
chr1	23536844	23536992	ALL_peaks_peak_987	139	.	8.33078	17	13.9442	84
chr1	23543132	23543425	ALL_peaks_peak_988	50	.	4.92273	7.65747	5.08577	185
chr1	23670898	23671197	ALL_peaks_peak_989	50	.	4.92273	7.65747	5.08577	39
chr1	23694827	23695006	ALL_peaks_peak_990	76	.	5.96347	10.3892	7.66676	52
chr1	23695387	23695485	ALL_peaks_peak_991	41	.	4.49472	6.67449	4.18199	40
chr1	23730335	23730932	ALL_peaks_peak_992	219	.	10.9815	25.3981	21.9106	290
chr1	23748286	23748413	ALL_peaks_peak_993	107	.	7.19476	13.6746	10.7774	49
chr1	23811009	23811167	ALL_peaks_peak_994	34	.	4.16539	5.88505	3.43822	29
chr1	23823507	23823918	ALL_peaks_peak_995	282	.	12.7014	32.2001	28.2714	204
chr1	23854718	23854905	ALL_peaks_peak_996	172	.	9.46679	20.4986	17.2718	125
chr1	23866370	23866741	ALL_peaks_peak_997	295	.	11.6884	33.5688	29.5365	114
chr1	23871129	23871453	ALL_peaks_peak_998	289	.	11.7124	32.97	28.9871	229
chr1	23885978	23886104	ALL_peaks_peak_999	25	.	3.69987	4.91575	2.56566	10
chr1	23961579	23961900	ALL_peaks_peak_1000	227	.	10.152	26.2606	22.7278	85
chr1	23963793	23964187	ALL_peaks_peak_1001	226	.	10.0905	26.1434	22.6174	276
chr1	23984322	23984733	ALL_peaks_peak_1002	263	.	12.2394	30.0804	26.3054	53
chr1	23991848	23991956	ALL_peaks_peak_1003	78	.	6.05875	10.5485	7.80868	59
chr1	23999696	23999766	ALL_peaks_peak_1004	50	.	4.92273	7.65747	5.08577	37
chr1	24017917	24018312	ALL_peaks_peak_1005	273	.	12.4881	31.1661	27.3145	262
chr1	24045084	24045415	ALL_peaks_peak_1006	279	.	12.8748	31.8499	27.9448	92
chr1	24054135	24054229	ALL_peaks_peak_1007	42	.	4.54406	6.75426	4.24317	49
chr1	24071577	24071967	ALL_peaks_peak_1008	73	.	5.55701	10.0601	7.35254	150
chr1	24072133	24072459	ALL_peaks_peak_1009	258	.	11.2947	29.6307	25.8837	108
chr1	24077897	24078201	ALL_peaks_peak_1010	279	.	12.8748	31.8499	27.9448	76
chr1	24098571	24099057	ALL_peaks_peak_1011	242	.	11.7388	27.938	24.2983	242
chr1	24123397	24123509	ALL_peaks_peak_1012	107	.	7.19476	13.6746	10.7774	51
chr1	24125181	24125253	ALL_peaks_peak_1013	59	.	5.3014	8.59228	5.96277	47
chr1	24136143	24136475	ALL_peaks_peak_1014	237	.	11.0819	27.3853	23.7846	231
chr1	24137388	24137492	ALL_peaks_peak_1015	128	.	7.68908	15.8871	12.8843	56
chr1	24181209	24181348	ALL_peaks_peak_1016	118	.	7.57344	14.7624	11.8126	58
chr1	24194847	24195177	ALL_peaks_peak_1017	161	.	9.08812	19.3145	16.1467	93
chr1	24243394	24243644	ALL_peaks_peak_1018	229	.	11.2646	26.4937	22.9488	81
chr1	24275495	24275879	ALL_peaks_peak_1019	228	.	11.1815	26.3479	22.8109	319
chr1	24285506	24285728	ALL_peaks_peak_1020	85	.	6.32064	11.37	8.5955	55
chr1	24330047	24330175	ALL_peaks_peak_1021	68	.	5.68008	9.55656	6.87133	73
chr1	24354718	24354908	ALL_peaks_peak_1022	242	.	11.7388	27.938	24.2983	47
chr1	24397246	24397603	ALL_peaks_peak_1023	279	.	12.8748	31.8499	27.9448	247
chr1	24439162	24439330	ALL_peaks_peak_1024	172	.	9.46679	20.4986	17.2718	50
chr1	24476850	24477279	ALL_peaks_peak_1025	144	.	7.80177	17.5274	14.4504	281
chr1	24482053	24482243	ALL_peaks_peak_1026	226	.	9.80279	26.1684	22.6407	110
chr1	24484484	24484776	ALL_peaks_peak_1027	195	.	9.56212	22.8642	19.523	95
chr1	24525727	24526033	ALL_peaks_peak_1028	219	.	8.89065	25.4268	21.9376	241
chr1	24528411	24528882	ALL_peaks_peak_1029	252	.	9.74269	28.9553	25.2564	116
chr1	24580218	24580294	ALL_peaks_peak_1030	34	.	4.16539	5.88505	3.43822	32
chr1	24592979	24593051	ALL_peaks_peak_1031	59	.	5.3014	8.59228	5.96277	17
chr1	24621299	24621431	ALL_peaks_peak_1032	42	.	4.54406	6.75426	4.24317	32
chr1	24631434	24631512	ALL_peaks_peak_1033	87	.	6.43742	11.5664	8.7735	40
chr1	24635306	24635444	ALL_peaks_peak_1034	195	.	10.2241	22.9168	19.5656	46
chr1	24645752	24645883	ALL_peaks_peak_1035	118	.	7.57344	14.7624	11.8126	60
chr1	24701987	24702190	ALL_peaks_peak_1036	50	.	4.92273	7.65747	5.08577	158
chr1	24711794	24712052	ALL_peaks_peak_1037	66	.	5.53628	9.31751	6.65435	35
chr1	24716710	24716831	ALL_peaks_peak_1038	142	.	6.75455	17.3149	14.2465	56
chr1	24717883	24718230	ALL_peaks_peak_1039	232	.	9.28901	26.8357	23.2649	60
chr1	24718765	24719050	ALL_peaks_peak_1040	153	.	7.31695	18.5066	15.3813	196
chr1	24741777	24742281	ALL_peaks_peak_1041	314	.	12.0634	35.6209	31.4302	295
chr1	24748165	24748233	ALL_peaks_peak_1042	50	.	4.92273	7.65747	5.08577	27
chr1	24818560	24818672	ALL_peaks_peak_1043	195	.	10.2241	22.9168	19.5656	54
chr1	24829325	24829413	ALL_peaks_peak_1044	26	.	3.78672	5.05267	2.67471	5
chr1	24853813	24854137	ALL_peaks_peak_1045	267	.	12.4962	30.5329	26.7222	48
chr1	24867653	24867745	ALL_peaks_peak_1046	78	.	5.84715	10.5636	7.82326	40
chr1	24868551	24868807	ALL_peaks_peak_1047	138	.	7.98334	16.8831	13.8398	98
chr1	24869760	24869833	ALL_peaks_peak_1048	42	.	4.40141	6.79731	4.28397	44
chr1	24882388	24882454	ALL_peaks_peak_1049	34	.	4.16539	5.88505	3.43822	48
chr1	24885644	24885802	ALL_peaks_peak_1050	68	.	5.68008	9.55656	6.87133	58
chr1	24891715	24891802	ALL_peaks_peak_1051	53	.	4.55244	7.93638	5.3512	26
chr1	24894394	24894476	ALL_peaks_peak_1052	47	.	4.33301	7.2451	4.70845	32
chr1	24894584	24894855	ALL_peaks_peak_1053	271	.	11.019	30.9749	27.1356	119
chr1	24913805	24914169	ALL_peaks_peak_1054	357	.	13.4344	40.3808	35.782	97
chr1	24920082	24920254	ALL_peaks_peak_1055	169	.	7.85711	20.1072	16.906	72
chr1	24920864	24920932	ALL_peaks_peak_1056	46	.	4.16168	7.21308	4.67812	28
chr1	24924284	24924459	ALL_peaks_peak_1057	74	.	5.02109	10.122	7.41205	128
chr1	24924596	24924796	ALL_peaks_peak_1058	107	.	6.01534	13.6207	10.7344	106
chr1	24961807	24962029	ALL_peaks_peak_1059	304	.	13.2683	34.5516	30.4403	97
chr1	24969484	24969735	ALL_peaks_peak_1060	139	.	8.33078	17	13.9442	52
chr1	25014961	25015260	ALL_peaks_peak_1061	118	.	7.57344	14.7624	11.8126	176
chr1	25031862	25032114	ALL_peaks_peak_1062	184	.	9.84547	21.6995	18.4122	62
chr1	25071490	25071689	ALL_peaks_peak_1063	97	.	6.81609	12.6089	9.76383	109
chr1	25074760	25074826	ALL_peaks_peak_1064	41	.	4.50586	6.69251	4.19884	38
chr1	25157288	25157652	ALL_peaks_peak_1065	307	.	12.3808	34.9178	30.7806	87
chr1	25161553	25161704	ALL_peaks_peak_1066	281	.	11.596	32.1015	28.1795	53
chr1	25174301	25174708	ALL_peaks_peak_1067	198	.	9.75314	23.2128	19.8482	294
chr1	25224713	25224848	ALL_peaks_peak_1068	161	.	9.08812	19.3145	16.1467	70
chr1	25236003	25236327	ALL_peaks_peak_1069	319	.	13.8232	36.2322	31.9894	206
chr1	25258858	25258949	ALL_peaks_peak_1070	78	.	6.05875	10.5485	7.80868	43
chr1	25317880	25317989	ALL_peaks_peak_1071	78	.	6.05875	10.5485	7.80868	51
chr1	25338777	25338896	ALL_peaks_peak_1072	78	.	6.05875	10.5485	7.80868	54
chr1	25344036	25344116	ALL_peaks_peak_1073	87	.	6.43742	11.5664	8.7735	46
chr1	25363645	25363876	ALL_peaks_peak_1074	111	.	6.90926	14.0524	11.1405	189
chr1	25364331	25364445	ALL_peaks_peak_1075	122	.	7.31772	15.2295	12.2617	55
chr1	25367647	25368037	ALL_peaks_peak_1076	73	.	5.55701	10.0601	7.35254	48
chr1	25427353	25427460	ALL_peaks_peak_1077	26	.	3.78672	5.05267	2.67471	102
chr1	25428020	25428156	ALL_peaks_peak_1078	255	.	12.1175	29.2288	25.5058	72
chr1	25444034	25444174	ALL_peaks_peak_1079	207	.	10.6028	24.1499	20.7324	84
chr1	25475319	25475403	ALL_peaks_peak_1080	150	.	8.70945	18.1481	15.037	31
chr1	25525388	25525520	ALL_peaks_peak_1081	97	.	6.81609	12.6089	9.76383	37
chr1	25531449	25531788	ALL_peaks_peak_1082	255	.	12.1175	29.2288	25.5058	79
chr1	25559809	25560027	ALL_peaks_peak_1083	42	.	4.54406	6.75426	4.24317	181
chr1	25566181	25566644	ALL_peaks_peak_1084	236	.	11.3312	27.2202	23.6284	358
chr1	25586388	25586454	ALL_peaks_peak_1085	68	.	5.68008	9.55656	6.87133	23
chr1	25593393	25593459	ALL_peaks_peak_1086	34	.	4.16539	5.88505	3.43822	42
chr1	25616701	25616833	ALL_peaks_peak_1087	59	.	5.3014	8.59228	5.96277	101
chr1	25656544	25656623	ALL_peaks_peak_1088	59	.	5.3014	8.59228	5.96277	33
chr1	25729412	25729652	ALL_peaks_peak_1089	78	.	6.05875	10.5485	7.80868	175
chr1	25757163	25757349	ALL_peaks_peak_1090	118	.	7.57344	14.7624	11.8126	64
chr1	25813177	25813369	ALL_peaks_peak_1091	168	.	9.1824	20.0045	16.8076	112
chr1	25814056	25814488	ALL_peaks_peak_1092	179	.	9.5497	21.1844	17.9279	191
chr1	25830370	25830557	ALL_peaks_peak_1093	149	.	8.38809	18.0925	14.9916	96
chr1	25833522	25833661	ALL_peaks_peak_1094	85	.	6.27445	11.292	8.52094	91
chr1	25846940	25847400	ALL_peaks_peak_1095	345	.	14.2312	39.0715	34.5873	200
chr1	25850161	25850264	ALL_peaks_peak_1096	190	.	9.58707	22.3523	19.0356	44
chr1	25894894	25895229	ALL_peaks_peak_1097	105	.	6.78656	13.4023	10.5249	55
chr1	25899227	25899516	ALL_peaks_peak_1098	188	.	9.1633	22.1271	18.8209	229
chr1	25900138	25900295	ALL_peaks_peak_1099	57	.	5.1672	8.37087	5.76408	126
chr1	25916756	25916881	ALL_peaks_peak_1100	150	.	8.70945	18.1481	15.037	79
chr1	25934971	25935353	ALL_peaks_peak_1101	182	.	9.71454	21.4721	18.2022	256
chr1	25937547	25937670	ALL_peaks_peak_1102	23	.	3.52759	4.64283	2.31307	84
chr1	25942682	25942806	ALL_peaks_peak_1103	65	.	5.46966	9.20629	6.54839	63
chr1	25945503	25945761	ALL_peaks_peak_1104	60	.	5.13593	8.64398	6.01217	144
chr1	26000780	26000859	ALL_peaks_peak_1105	50	.	4.92273	7.65747	5.08577	49
chr1	26019223	26019325	ALL_peaks_peak_1106	107	.	7.19476	13.6746	10.7774	49
chr1	26021761	26021848	ALL_peaks_peak_1107	59	.	5.3014	8.59228	5.96277	45
chr1	26024115	26024181	ALL_peaks_peak_1108	42	.	4.5283	6.7288	4.23297	40
chr1	26070744	26070826	ALL_peaks_peak_1109	59	.	5.3014	8.59228	5.96277	34
chr1	26100107	26100185	ALL_peaks_peak_1110	34	.	4.16539	5.88505	3.43822	17
chr1	26123436	26123732	ALL_peaks_peak_1111	257	.	11.5372	29.4525	25.7167	62
chr1	26124535	26124772	ALL_peaks_peak_1112	198	.	9.75314	23.2128	19.8482	68
chr1	26137470	26137746	ALL_peaks_peak_1113	107	.	7.19476	13.6746	10.7774	64
chr1	26144743	26144831	ALL_peaks_peak_1114	118	.	7.57344	14.7624	11.8126	38
chr1	26146494	26146577	ALL_peaks_peak_1115	68	.	5.68008	9.55656	6.87133	40
chr1	26163890	26164003	ALL_peaks_peak_1116	207	.	10.6028	24.1499	20.7324	61
chr1	26216121	26216440	ALL_peaks_peak_1117	145	.	8.42738	17.6607	14.5779	58
chr1	26216938	26217276	ALL_peaks_peak_1118	90	.	5.94742	11.8922	9.08626	271
chr1	26221934	26222143	ALL_peaks_peak_1119	323	.	12.9012	36.5868	32.316	63
chr1	26231575	26231645	ALL_peaks_peak_1120	34	.	4.16539	5.88505	3.43822	15
chr1	26284293	26284388	ALL_peaks_peak_1121	97	.	6.81609	12.6089	9.76383	48
chr1	26324512	26325128	ALL_peaks_peak_1122	195	.	10.2241	22.9168	19.5656	212
chr1	26331066	26331176	ALL_peaks_peak_1123	255	.	12.1175	29.2288	25.5058	45
chr1	26336719	26336912	ALL_peaks_peak_1124	139	.	8.33078	17	13.9442	80
chr1	26361879	26362176	ALL_peaks_peak_1125	144	.	8.36668	17.5552	14.477	103
chr1	26362358	26362698	ALL_peaks_peak_1126	90	.	6.37936	11.8658	9.06094	292
chr1	26431174	26431715	ALL_peaks_peak_1127	238	.	11.4416	27.4154	23.813	432
chr1	26445309	26445568	ALL_peaks_peak_1128	228	.	11.2091	26.3963	22.8565	214
chr1	26468766	26468898	ALL_peaks_peak_1129	44	.	4.48152	6.93093	4.4106	112
chr1	26471461	26472063	ALL_peaks_peak_1130	283	.	12.4104	32.3315	28.393	315
chr1	26496104	26496394	ALL_peaks_peak_1131	97	.	6.81609	12.6089	9.76383	206
chr1	26503769	26504018	ALL_peaks_peak_1132	182	.	9.73856	21.5139	18.2421	125
chr1	26560393	26560943	ALL_peaks_peak_1133	327	.	12.4688	37.0963	32.785	131
chr1	26602113	26602558	ALL_peaks_peak_1134	311	.	12.5865	35.3115	31.1438	105
chr1	26606194	26606261	ALL_peaks_peak_1135	44	.	4.33329	6.96165	4.43988	24
chr1	26611346	26611576	ALL_peaks_peak_1136	78	.	5.86045	10.5865	7.84507	201
chr1	26611708	26611823	ALL_peaks_peak_1137	148	.	8.29245	17.923	14.8293	52
chr1	26612408	26612599	ALL_peaks_peak_1138	167	.	8.82253	19.8953	16.7031	108
chr1	26633172	26633297	ALL_peaks_peak_1139	128	.	7.95211	15.8712	12.8691	60
chr1	26648126	26648318	ALL_peaks_peak_1140	230	.	11.3602	26.6609	23.099	102
chr1	26663015	26663087	ALL_peaks_peak_1141	50	.	4.92273	7.65747	5.08577	22
chr1	26690393	26690844	ALL_peaks_peak_1142	219	.	10.9815	25.3981	21.9106	105
chr1	26717954	26718262	ALL_peaks_peak_1143	301	.	12.6954	34.1785	30.1019	188
chr1	26722863	26723059	ALL_peaks_peak_1144	287	.	12.6112	32.6967	28.7344	103
chr1	26743614	26743962	ALL_peaks_peak_1145	307	.	13.4272	34.8369	30.7069	93
chr1	26796883	26797175	ALL_peaks_peak_1146	216	.	10.4851	25.1113	21.6461	94
chr1	26798565	26798699	ALL_peaks_peak_1147	44	.	4.52268	6.99935	4.47559	50
chr1	26826611	26826947	ALL_peaks_peak_1148	89	.	6.29107	11.7139	8.91511	265
chr1	26827111	26827258	ALL_peaks_peak_1149	22	.	3.48699	4.57823	2.25322	110
chr1	26827631	26827755	ALL_peaks_peak_1150	22	.	3.48699	4.57823	2.25322	15
chr1	26857661	26857860	ALL_peaks_peak_1151	128	.	7.95211	15.8712	12.8691	134
chr1	26864488	26864785	ALL_peaks_peak_1152	175	.	9.0006	20.7467	17.5095	157
chr1	26865305	26865442	ALL_peaks_peak_1153	188	.	9.47996	22.159	18.8515	81
chr1	26868458	26868602	ALL_peaks_peak_1154	76	.	5.74286	10.3835	7.66145	47
chr1	26910764	26910843	ALL_peaks_peak_1155	118	.	7.57344	14.7624	11.8126	53
chr1	26924021	26924518	ALL_peaks_peak_1156	346	.	13.5025	39.1148	34.6274	209
chr1	26928785	26929088	ALL_peaks_peak_1157	150	.	7.88644	18.1754	15.0632	171
chr1	26946517	26946945	ALL_peaks_peak_1158	73	.	5.55701	10.0601	7.35254	140
chr1	26947950	26948040	ALL_peaks_peak_1159	48	.	4.5567	7.34591	4.80366	29
chr1	27004061	27004325	ALL_peaks_peak_1160	329	.	14.3895	37.2403	32.9119	162
chr1	27018795	27019037	ALL_peaks_peak_1161	193	.	10.1131	22.7236	19.3892	63
chr1	27019583	27019658	ALL_peaks_peak_1162	33	.	4.09989	5.78037	3.35554	40
chr1	27024695	27024822	ALL_peaks_peak_1163	34	.	4.16539	5.88505	3.43822	5
chr1	27032326	27032498	ALL_peaks_peak_1164	34	.	4.16539	5.88505	3.43822	35
chr1	27087852	27088000	ALL_peaks_peak_1165	242	.	11.7388	27.938	24.2983	49
chr1	27110699	27110803	ALL_peaks_peak_1166	78	.	6.05875	10.5485	7.80868	58
chr1	27115591	27116060	ALL_peaks_peak_1167	308	.	12.776	34.9983	30.855	260
chr1	27136591	27136760	ALL_peaks_peak_1168	230	.	11.3602	26.6609	23.099	97
chr1	27149622	27149745	ALL_peaks_peak_1169	115	.	7.17409	14.5222	11.5911	61
chr1	27151319	27151428	ALL_peaks_peak_1170	44	.	4.48152	6.93093	4.4106	43
chr1	27158417	27158506	ALL_peaks_peak_1171	34	.	4.16539	5.88505	3.43822	55
chr1	27179523	27179895	ALL_peaks_peak_1172	255	.	12.1175	29.2288	25.5058	236
chr1	27187810	27188048	ALL_peaks_peak_1173	171	.	7.74419	20.3723	17.1589	43
chr1	27189151	27189561	ALL_peaks_peak_1174	219	.	8.89065	25.4268	21.9376	300
chr1	27191640	27191867	ALL_peaks_peak_1175	50	.	4.20521	7.57778	5.023	47
chr1	27204545	27204900	ALL_peaks_peak_1176	325	.	14.1632	36.8391	32.5483	80
chr1	27213718	27213895	ALL_peaks_peak_1177	207	.	10.6028	24.1499	20.7324	104
chr1	27230709	27230775	ALL_peaks_peak_1178	42	.	4.54406	6.75426	4.24317	15
chr1	27248046	27248241	ALL_peaks_peak_1179	42	.	4.54406	6.75426	4.24317	44
chr1	27286913	27286979	ALL_peaks_peak_1180	42	.	4.54406	6.75426	4.24317	42
chr1	27291132	27291347	ALL_peaks_peak_1181	127	.	7.61878	15.7635	12.7737	52
chr1	27293478	27293672	ALL_peaks_peak_1182	332	.	14.2211	37.6422	33.2806	116
chr1	27324036	27324103	ALL_peaks_peak_1183	58	.	5.19249	8.41269	5.80365	35
chr1	27324207	27324426	ALL_peaks_peak_1184	287	.	13.0131	32.7547	28.7871	101
chr1	27339365	27339836	ALL_peaks_peak_1185	107	.	7.19476	13.6746	10.7774	154
chr1	27371005	27371318	ALL_peaks_peak_1186	291	.	12.4713	33.1007	29.1082	206
chr1	27372333	27372641	ALL_peaks_peak_1187	133	.	7.70107	16.3813	13.3591	260
chr1	27424000	27424326	ALL_peaks_peak_1188	219	.	10.9815	25.3981	21.9106	64
chr1	27429295	27429421	ALL_peaks_peak_1189	87	.	6.43742	11.5664	8.7735	63
chr1	27435734	27435847	ALL_peaks_peak_1190	184	.	9.84547	21.6995	18.4122	48
chr1	27454042	27454117	ALL_peaks_peak_1191	78	.	6.05875	10.5485	7.80868	34
chr1	27468197	27468328	ALL_peaks_peak_1192	59	.	5.3014	8.59228	5.96277	58
chr1	27481648	27482144	ALL_peaks_peak_1193	198	.	9.73154	23.1736	19.8107	217
chr1	27489730	27489826	ALL_peaks_peak_1194	42	.	4.54406	6.75426	4.24317	32
chr1	27524327	27524828	ALL_peaks_peak_1195	389	.	14.4589	43.8112	38.9181	278
chr1	27560844	27560961	ALL_peaks_peak_1196	78	.	6.05875	10.5485	7.80868	55
chr1	27611164	27611514	ALL_peaks_peak_1197	337	.	12.686	38.2059	33.7981	195
chr1	27614409	27614493	ALL_peaks_peak_1198	67	.	5.16686	9.36921	6.70355	44
chr1	27623144	27623406	ALL_peaks_peak_1199	175	.	8.45777	20.7884	17.5492	217
chr1	27626009	27626271	ALL_peaks_peak_1200	54	.	4.59559	8.0148	5.42574	162
chr1	27627352	27627534	ALL_peaks_peak_1201	273	.	11.1254	31.1849	27.3317	103
chr1	27633396	27633722	ALL_peaks_peak_1202	217	.	10.5337	25.1985	21.7287	81
chr1	27648448	27648821	ALL_peaks_peak_1203	159	.	8.96727	19.1056	15.9549	243
chr1	27659355	27659505	ALL_peaks_peak_1204	224	.	10.9922	26.0144	22.4952	92
chr1	27675870	27675940	ALL_peaks_peak_1205	42	.	4.53961	6.74707	4.24317	56
chr1	27684084	27684223	ALL_peaks_peak_1206	103	.	6.69658	13.2437	10.3732	76
chr1	27693451	27693588	ALL_peaks_peak_1207	93	.	5.89755	12.1912	9.37285	43
chr1	27695493	27695647	ALL_peaks_peak_1208	208	.	8.87404	24.2952	20.8707	60
chr1	27699367	27699609	ALL_peaks_peak_1209	108	.	6.97399	13.7304	10.8309	220
chr1	27714821	27714887	ALL_peaks_peak_1210	14	.	2.82239	3.66044	1.43515	47
chr1	27715020	27715311	ALL_peaks_peak_1211	281	.	10.6278	32.0377	28.1201	59
chr1	27718910	27719082	ALL_peaks_peak_1212	39	.	3.65089	6.4699	3.9893	22
chr1	27721932	27722295	ALL_peaks_peak_1213	204	.	8.67967	23.8905	20.4932	56
chr1	27728906	27729107	ALL_peaks_peak_1214	133	.	7.70107	16.3813	13.3591	83
chr1	27729213	27729299	ALL_peaks_peak_1215	20	.	3.37815	4.40442	2.09223	34
chr1	27729532	27729678	ALL_peaks_peak_1216	86	.	6.12162	11.4205	8.64385	96
chr1	27743000	27743401	ALL_peaks_peak_1217	212	.	10.2256	24.6432	21.2016	209
chr1	27814519	27814585	ALL_peaks_peak_1218	40	.	4.40755	6.5332	4.04891	55
chr1	27823436	27823526	ALL_peaks_peak_1219	59	.	5.25683	8.51888	5.90458	51
chr1	27834895	27834991	ALL_peaks_peak_1220	87	.	6.43742	11.5664	8.7735	49
chr1	27868688	27868795	ALL_peaks_peak_1221	34	.	4.16539	5.88505	3.43822	61
chr1	27869058	27869178	ALL_peaks_peak_1222	97	.	6.79245	12.569	9.73459	54
chr1	27873916	27873990	ALL_peaks_peak_1223	68	.	5.68008	9.55656	6.87133	23
chr1	27883124	27883467	ALL_peaks_peak_1224	273	.	10.5307	31.2199	27.3646	283
chr1	27883762	27884052	ALL_peaks_peak_1225	102	.	5.97216	13.1305	10.2646	206
chr1	27894953	27895256	ALL_peaks_peak_1226	210	.	10.1344	24.4777	21.0441	140
chr1	27895349	27895415	ALL_peaks_peak_1227	35	.	4.08108	5.99905	3.54577	18
chr1	27901644	27901714	ALL_peaks_peak_1228	42	.	4.54406	6.75426	4.24317	8
chr1	27902601	27902696	ALL_peaks_peak_1229	68	.	5.68008	9.55656	6.87133	49
chr1	27926172	27926285	ALL_peaks_peak_1230	101	.	6.78135	12.9684	10.1091	71
chr1	27932494	27932573	ALL_peaks_peak_1231	50	.	4.08571	7.6211	5.06397	50
chr1	27933021	27933170	ALL_peaks_peak_1232	122	.	6.16551	15.171	12.2057	104
chr1	27933267	27933343	ALL_peaks_peak_1233	31	.	3.42528	5.55054	3.14088	31
chr1	27935214	27935372	ALL_peaks_peak_1234	133	.	6.54175	16.4116	13.3882	87
chr1	27970322	27970774	ALL_peaks_peak_1235	189	.	9.25985	22.3068	18.9923	249
chr1	27989763	27990111	ALL_peaks_peak_1236	304	.	12.1817	34.5337	30.4245	99
chr1	27995722	27995867	ALL_peaks_peak_1237	135	.	6.60284	16.5428	13.5138	83
chr1	27995981	27996056	ALL_peaks_peak_1238	40	.	3.78483	6.49044	4.00876	27
chr1	27998698	27999127	ALL_peaks_peak_1239	278	.	9.92384	31.7126	27.8251	172
chr1	28013227	28013423	ALL_peaks_peak_1240	94	.	6.62739	12.2894	9.46694	117
chr1	28045958	28046079	ALL_peaks_peak_1241	22	.	3.48699	4.57823	2.25322	70
chr1	28046189	28046521	ALL_peaks_peak_1242	205	.	10.159	23.9451	20.5449	82
chr1	28052166	28052429	ALL_peaks_peak_1243	162	.	8.53578	19.3765	16.2062	109
chr1	28071217	28071324	ALL_peaks_peak_1244	238	.	11.1328	27.4773	23.8714	48
chr1	28099443	28099771	ALL_peaks_peak_1245	75	.	5.90537	10.2918	7.57382	205
chr1	28157147	28157318	ALL_peaks_peak_1246	115	.	7.39973	14.4658	11.5368	112
chr1	28184626	28184984	ALL_peaks_peak_1247	296	.	12.4484	33.7189	29.6764	114
chr1	28241120	28241354	ALL_peaks_peak_1248	78	.	6.05875	10.5485	7.80868	82
chr1	28261322	28261775	ALL_peaks_peak_1249	234	.	10.9074	27.0687	23.4853	192
chr1	28267010	28267077	ALL_peaks_peak_1250	50	.	4.92273	7.65747	5.08577	36
chr1	28285974	28286265	ALL_peaks_peak_1251	30	.	3.8894	5.44211	3.03931	60
chr1	28286609	28286770	ALL_peaks_peak_1252	130	.	7.81528	16.1082	13.0968	101
chr1	28295217	28295422	ALL_peaks_peak_1253	107	.	7.19476	13.6746	10.7774	91
chr1	28306229	28306584	ALL_peaks_peak_1254	313	.	12.3375	35.4992	31.3174	100
chr1	28333238	28333369	ALL_peaks_peak_1255	68	.	5.63232	9.47732	6.80659	65
chr1	28363085	28363192	ALL_peaks_peak_1256	139	.	8.33078	17	13.9442	55
chr1	28414460	28414569	ALL_peaks_peak_1257	49	.	4.0254	7.49791	4.94756	62
chr1	28415110	28415384	ALL_peaks_peak_1258	117	.	5.96764	14.7382	11.7979	73
chr1	28417618	28417992	ALL_peaks_peak_1259	270	.	9.5598	30.8802	27.0472	293
chr1	28431718	28431919	ALL_peaks_peak_1260	68	.	5.68008	9.55656	6.87133	78
chr1	28439708	28439952	ALL_peaks_peak_1261	161	.	9.08812	19.3145	16.1467	36
chr1	28535351	28535809	ALL_peaks_peak_1262	392	.	14.6372	44.1568	39.2345	206
chr1	28562468	28562632	ALL_peaks_peak_1263	63	.	5.31613	8.94873	6.3028	100
chr1	28573002	28573068	ALL_peaks_peak_1264	27	.	3.19421	5.09374	2.71327	46
chr1	28573755	28574006	ALL_peaks_peak_1265	122	.	5.97933	15.1719	12.2066	191
chr1	28574853	28575377	ALL_peaks_peak_1266	262	.	9.18254	29.997	26.2269	285
chr1	28582029	28582138	ALL_peaks_peak_1267	87	.	6.20518	11.5655	8.7735	49
chr1	28585750	28585954	ALL_peaks_peak_1268	79	.	5.90073	10.6557	7.91157	153
chr1	28655374	28655593	ALL_peaks_peak_1269	97	.	6.3593	12.6426	9.79608	75
chr1	28655928	28656194	ALL_peaks_peak_1270	115	.	6.90825	14.4902	11.5605	207
chr1	28686098	28686445	ALL_peaks_peak_1271	376	.	13.4056	42.4286	37.6571	246
chr1	28694772	28694885	ALL_peaks_peak_1272	102	.	5.59084	13.1232	10.2577	48
chr1	28696066	28696287	ALL_peaks_peak_1273	59	.	4.43221	8.61664	5.98628	158
chr1	28696735	28697303	ALL_peaks_peak_1274	160	.	7.22039	19.2513	16.0941	333
chr1	28736187	28736465	ALL_peaks_peak_1275	194	.	9.21036	22.7641	19.4277	201
chr1	28742686	28742754	ALL_peaks_peak_1276	49	.	4.83343	7.51154	4.96027	40
chr1	28762859	28762991	ALL_peaks_peak_1277	189	.	9.24038	22.2706	18.9579	43
chr1	28764549	28764709	ALL_peaks_peak_1278	56	.	4.88218	8.20973	5.61095	75
chr1	28764924	28764991	ALL_peaks_peak_1279	26	.	3.59571	4.96436	2.61074	2
chr1	28798113	28798200	ALL_peaks_peak_1280	107	.	7.19476	13.6746	10.7774	40
chr1	28813248	28813370	ALL_peaks_peak_1281	78	.	6.05875	10.5485	7.80868	65
chr1	28832342	28832659	ALL_peaks_peak_1282	78	.	5.88724	10.6326	7.88935	36
chr1	28837434	28837605	ALL_peaks_peak_1283	19	.	3.3117	4.29782	1.99308	27
chr1	28843993	28844072	ALL_peaks_peak_1284	28	.	3.40202	5.28517	2.89256	30
chr1	28844259	28844787	ALL_peaks_peak_1285	139	.	6.79315	16.9473	13.9017	417
chr1	28867349	28867463	ALL_peaks_peak_1286	116	.	7.4912	14.6222	11.6867	53
chr1	28879359	28879528	ALL_peaks_peak_1287	25	.	3.69085	4.90152	2.55236	24
chr1	28908353	28908469	ALL_peaks_peak_1288	50	.	4.90566	7.62961	5.07202	54
chr1	28929439	28929908	ALL_peaks_peak_1289	301	.	12.7235	34.2304	30.1495	95
chr1	28967231	28967572	ALL_peaks_peak_1290	285	.	11.4625	32.4809	28.5329	242
chr1	28969680	28969790	ALL_peaks_peak_1291	55	.	4.66636	8.14286	5.54753	52
chr1	28975275	28976062	ALL_peaks_peak_1292	153	.	7.0855	18.4883	15.3636	660
chr1	28980494	28980676	ALL_peaks_peak_1293	316	.	11.5637	35.9058	31.6869	65
chr1	28985940	28986019	ALL_peaks_peak_1294	68	.	5.68008	9.55656	6.87133	39
chr1	28995121	28995291	ALL_peaks_peak_1295	68	.	5.68008	9.55656	6.87133	110
chr1	29062822	29063440	ALL_peaks_peak_1296	172	.	8.5444	20.4315	17.2155	446
chr1	29083521	29083775	ALL_peaks_peak_1297	139	.	8.33078	17	13.9442	60
chr1	29111466	29111993	ALL_peaks_peak_1298	252	.	11.2352	28.8971	25.2015	310
chr1	29119316	29119571	ALL_peaks_peak_1299	107	.	7.19476	13.6746	10.7774	104
chr1	29167594	29167660	ALL_peaks_peak_1300	59	.	5.3014	8.59228	5.96277	38
chr1	29172830	29173014	ALL_peaks_peak_1301	195	.	10.2241	22.9168	19.5656	63
chr1	29203772	29204120	ALL_peaks_peak_1302	226	.	9.2526	26.1941	22.6656	94
chr1	29208620	29208911	ALL_peaks_peak_1303	293	.	10.1233	33.3657	29.348	144
chr1	29220331	29220495	ALL_peaks_peak_1304	87	.	6.43742	11.5664	8.7735	65
chr1	29360438	29360835	ALL_peaks_peak_1305	348	.	13.2666	39.3543	34.8461	122
chr1	29432521	29432674	ALL_peaks_peak_1306	41	.	4.47261	6.63869	4.14804	123
chr1	29444111	29444177	ALL_peaks_peak_1307	34	.	4.16539	5.88505	3.43822	45
chr1	29450933	29451004	ALL_peaks_peak_1308	42	.	4.54406	6.75426	4.24317	15
chr1	29451133	29451199	ALL_peaks_peak_1309	42	.	4.54406	6.75426	4.24317	42
chr1	29463965	29464045	ALL_peaks_peak_1310	97	.	6.81609	12.6089	9.76383	32
chr1	29508435	29508702	ALL_peaks_peak_1311	130	.	7.27979	16.0816	13.0712	124
chr1	29509650	29509716	ALL_peaks_peak_1312	28	.	3.63262	5.24891	2.85862	11
chr1	29524130	29524280	ALL_peaks_peak_1313	187	.	9.75152	22.0896	18.7849	76
chr1	29529387	29529664	ALL_peaks_peak_1314	334	.	12.8627	37.8747	33.4945	107
chr1	29554145	29554436	ALL_peaks_peak_1315	74	.	5.83431	10.1723	7.45973	231
chr1	29557434	29557598	ALL_peaks_peak_1316	64	.	5.37904	9.05449	6.4037	46
chr1	29562670	29562762	ALL_peaks_peak_1317	75	.	5.45984	10.2481	7.53221	57
chr1	29562920	29563021	ALL_peaks_peak_1318	67	.	5.21921	9.46293	6.79288	49
chr1	29565780	29565955	ALL_peaks_peak_1319	56	.	4.73009	8.25759	5.65655	135
chr1	29572232	29572572	ALL_peaks_peak_1320	285	.	12.1208	32.4508	28.5047	260
chr1	29583142	29583220	ALL_peaks_peak_1321	68	.	5.68008	9.55656	6.87133	27
chr1	29598298	29598494	ALL_peaks_peak_1322	172	.	9.46679	20.4986	17.2718	96
chr1	29609562	29610133	ALL_peaks_peak_1323	166	.	8.76365	19.7893	16.6019	445
chr1	29638744	29638827	ALL_peaks_peak_1324	139	.	8.33078	17	13.9442	47
chr1	29647227	29647325	ALL_peaks_peak_1325	27	.	3.69128	5.12066	2.73833	53
chr1	29651268	29651657	ALL_peaks_peak_1326	144	.	8.05369	17.4969	14.421	145
chr1	29658821	29658998	ALL_peaks_peak_1327	250	.	11.8396	28.7395	25.0538	75
chr1	29667362	29667707	ALL_peaks_peak_1328	230	.	10.3196	26.5786	23.0287	240
chr1	29668599	29668666	ALL_peaks_peak_1329	44	.	4.31566	6.93107	4.4106	40
chr1	29705927	29706373	ALL_peaks_peak_1330	194	.	10.1382	22.7673	19.4307	228
chr1	29723333	29723418	ALL_peaks_peak_1331	97	.	6.81609	12.6089	9.76383	46
chr1	29738490	29738787	ALL_peaks_peak_1332	137	.	7.18192	16.8227	13.7818	92
chr1	29741995	29742218	ALL_peaks_peak_1333	207	.	9.06593	24.1373	20.7277	140
chr1	29742943	29743063	ALL_peaks_peak_1334	72	.	5.13597	10.0009	7.296	80
chr1	29779981	29780317	ALL_peaks_peak_1335	347	.	13.9396	39.2397	34.7407	240
chr1	29781592	29781701	ALL_peaks_peak_1336	84	.	6.01363	11.2322	8.46359	47
chr1	29839877	29840082	ALL_peaks_peak_1337	194	.	10.1634	22.8111	19.4726	119
chr1	30117847	30117934	ALL_peaks_peak_1338	50	.	4.92273	7.65747	5.08577	38
chr1	30129467	30129588	ALL_peaks_peak_1339	150	.	8.70945	18.1481	15.037	57
chr1	30170801	30171122	ALL_peaks_peak_1340	229	.	11.2368	26.4449	22.9027	194
chr1	30176520	30176782	ALL_peaks_peak_1341	238	.	10.8105	27.4971	23.8903	64
chr1	30179980	30180093	ALL_peaks_peak_1342	126	.	7.26744	15.5972	12.6145	60
chr1	30186829	30187014	ALL_peaks_peak_1343	219	.	10.9815	25.3981	21.9106	94
chr1	30262059	30262186	ALL_peaks_peak_1344	28	.	3.79206	5.28459	2.8921	28
chr1	30265769	30266126	ALL_peaks_peak_1345	301	.	12.6954	34.1785	30.1019	273
chr1	30321909	30322215	ALL_peaks_peak_1346	350	.	13.7591	39.6044	35.0755	123
chr1	30322307	30322373	ALL_peaks_peak_1347	46	.	4.47971	7.21413	4.67896	26
chr1	30349830	30349966	ALL_peaks_peak_1348	184	.	9.84547	21.6995	18.4122	81
chr1	30385411	30385542	ALL_peaks_peak_1349	128	.	7.95211	15.8712	12.8691	62
chr1	30525220	30525296	ALL_peaks_peak_1350	107	.	7.19476	13.6746	10.7774	31
chr1	30560297	30560709	ALL_peaks_peak_1351	278	.	11.0758	31.7136	27.8259	229
chr1	30561671	30561803	ALL_peaks_peak_1352	25	.	3.43367	4.90848	2.559	75
chr1	30578910	30579398	ALL_peaks_peak_1353	203	.	9.72258	23.7223	20.333	281
chr1	30584433	30584566	ALL_peaks_peak_1354	224	.	10.9393	25.9209	22.4062	61
chr1	30606661	30606824	ALL_peaks_peak_1355	78	.	6.05875	10.5485	7.80868	39
chr1	30664247	30664452	ALL_peaks_peak_1356	68	.	5.68008	9.55656	6.87133	167
chr1	30705103	30705449	ALL_peaks_peak_1357	259	.	11.6678	29.691	25.9408	235
chr1	30763221	30763396	ALL_peaks_peak_1358	195	.	10.2241	22.9168	19.5656	113
chr1	30779711	30779805	ALL_peaks_peak_1359	118	.	7.57344	14.7624	11.8126	50
chr1	30813937	30814186	ALL_peaks_peak_1360	142	.	7.98297	17.3698	14.2991	60
chr1	30818445	30818514	ALL_peaks_peak_1361	41	.	4.29582	6.62027	4.13099	32
chr1	30826590	30826693	ALL_peaks_peak_1362	242	.	11.7388	27.938	24.2983	56
chr1	30852894	30853675	ALL_peaks_peak_1363	297	.	11.1934	33.8477	29.7958	508
chr1	30881654	30881799	ALL_peaks_peak_1364	230	.	11.3602	26.6609	23.099	60
chr1	30900646	30900736	ALL_peaks_peak_1365	78	.	6.05875	10.5485	7.80868	51
chr1	31006167	31006234	ALL_peaks_peak_1366	59	.	5.3014	8.59228	5.96277	34
chr1	31042378	31042476	ALL_peaks_peak_1367	38	.	4.26288	6.29754	3.82722	40
chr1	31045172	31045313	ALL_peaks_peak_1368	126	.	7.78874	15.5913	12.6088	41
chr1	31158052	31158434	ALL_peaks_peak_1369	192	.	9.71885	22.5891	19.2613	44
chr1	31181046	31181399	ALL_peaks_peak_1370	280	.	12.2158	31.9755	28.0617	115
chr1	31188227	31188325	ALL_peaks_peak_1371	80	.	5.36797	10.8001	8.04988	28
chr1	31190942	31191201	ALL_peaks_peak_1372	89	.	5.45987	11.7156	8.9168	39
chr1	31191540	31191665	ALL_peaks_peak_1373	58	.	4.49663	8.44056	5.83024	55
chr1	31191938	31192041	ALL_peaks_peak_1374	30	.	3.48588	5.442	3.03931	39
chr1	31192196	31192304	ALL_peaks_peak_1375	70	.	4.84449	9.76886	7.07429	60
chr1	31197186	31197267	ALL_peaks_peak_1376	60	.	5.18278	8.72348	6.088	54
chr1	31210885	31211057	ALL_peaks_peak_1377	128	.	7.95211	15.8712	12.8691	58
chr1	31250811	31250885	ALL_peaks_peak_1378	56	.	4.40227	8.25531	5.6544	34
chr1	31252577	31252861	ALL_peaks_peak_1379	138	.	6.3527	16.8603	13.818	87
chr1	31255293	31255437	ALL_peaks_peak_1380	105	.	5.53663	13.3862	10.5097	40
chr1	31255847	31256206	ALL_peaks_peak_1381	189	.	7.70213	22.2754	18.9623	61
chr1	31270647	31270744	ALL_peaks_peak_1382	22	.	3.3299	4.52464	2.20363	56
chr1	31274335	31274407	ALL_peaks_peak_1383	55	.	4.64846	8.11054	5.51684	36
chr1	31274527	31274843	ALL_peaks_peak_1384	165	.	8.16612	19.7101	16.526	214
chr1	31274943	31275023	ALL_peaks_peak_1385	14	.	2.91647	3.65496	1.43024	38
chr1	31296997	31297117	ALL_peaks_peak_1386	87	.	6.43742	11.5664	8.7735	38
chr1	31297272	31297497	ALL_peaks_peak_1387	127	.	7.88525	15.7568	12.7675	177
chr1	31318747	31318977	ALL_peaks_peak_1388	118	.	7.57344	14.7624	11.8126	174
chr1	31376339	31376432	ALL_peaks_peak_1389	50	.	4.92273	7.65747	5.08577	52
chr1	31384300	31384679	ALL_peaks_peak_1390	222	.	10.1749	25.7169	22.2129	78
chr1	31402262	31402729	ALL_peaks_peak_1391	232	.	10.1505	26.8467	23.275	187
chr1	31449913	31450410	ALL_peaks_peak_1392	362	.	13.3387	40.8905	36.2506	369
chr1	31538570	31538787	ALL_peaks_peak_1393	128	.	7.39075	15.8219	12.83	134
chr1	31627571	31627655	ALL_peaks_peak_1394	20	.	3.37064	4.39238	2.08098	58
chr1	31628180	31628479	ALL_peaks_peak_1395	59	.	5.07855	8.54633	5.93064	40
chr1	31635486	31635926	ALL_peaks_peak_1396	294	.	11.9735	33.4755	29.45	204
chr1	31643529	31643983	ALL_peaks_peak_1397	149	.	7.80828	18.0281	14.9298	252
chr1	31645241	31645344	ALL_peaks_peak_1398	42	.	4.23806	6.79604	4.28292	62
chr1	31655316	31655695	ALL_peaks_peak_1399	149	.	6.50354	18.0815	14.9813	151
chr1	31656941	31657192	ALL_peaks_peak_1400	100	.	5.3198	12.8957	10.0392	50
chr1	31658422	31658782	ALL_peaks_peak_1401	285	.	9.51475	32.5179	28.5674	271
chr1	31668071	31668157	ALL_peaks_peak_1402	107	.	7.16981	13.6323	10.7455	29
chr1	31669435	31669501	ALL_peaks_peak_1403	59	.	5.3014	8.59228	5.96277	43
chr1	31702007	31702099	ALL_peaks_peak_1404	50	.	4.92273	7.65747	5.08577	33
chr1	31769578	31769863	ALL_peaks_peak_1405	170	.	9.02464	20.2571	17.0491	130
chr1	31807952	31808306	ALL_peaks_peak_1406	236	.	10.672	27.2399	23.6471	108
chr1	31846496	31846569	ALL_peaks_peak_1407	78	.	6.05875	10.5485	7.80868	34
chr1	31863016	31863148	ALL_peaks_peak_1408	41	.	4.0047	6.64862	4.15767	40
chr1	31867360	31867846	ALL_peaks_peak_1409	170	.	7.69345	20.2656	17.0573	265
chr1	31869599	31869668	ALL_peaks_peak_1410	42	.	4.03313	6.70094	4.20672	36
chr1	31874212	31874323	ALL_peaks_peak_1411	138	.	8.28126	16.9151	13.8707	51
chr1	31894379	31894490	ALL_peaks_peak_1412	89	.	5.85549	11.722	8.92273	65
chr1	31895397	31895877	ALL_peaks_peak_1413	181	.	8.76133	21.3703	18.1058	365
chr1	31904640	31904921	ALL_peaks_peak_1414	259	.	12.0333	29.7147	25.9628	75
chr1	31932976	31933111	ALL_peaks_peak_1415	137	.	8.19978	16.7749	13.7363	100
chr1	31976842	31976908	ALL_peaks_peak_1416	42	.	4.54406	6.75426	4.24317	19
chr1	32014552	32014997	ALL_peaks_peak_1417	255	.	10.1991	29.3221	25.5935	115
chr1	32015200	32015429	ALL_peaks_peak_1418	48	.	4.28679	7.44733	4.89952	111
chr1	32029557	32030052	ALL_peaks_peak_1419	239	.	10.5452	27.6038	23.9912	286
chr1	32053429	32053605	ALL_peaks_peak_1420	235	.	10.932	27.1134	23.5277	111
chr1	32059603	32060061	ALL_peaks_peak_1421	219	.	10.0069	25.4012	21.9135	185
chr1	32083877	32084153	ALL_peaks_peak_1422	68	.	5.68008	9.55656	6.87133	27
chr1	32098842	32099157	ALL_peaks_peak_1423	216	.	10.8088	25.096	21.6316	90
chr1	32106572	32106645	ALL_peaks_peak_1424	43	.	4.43111	6.84692	4.33111	34
chr1	32110654	32110797	ALL_peaks_peak_1425	35	.	4.07194	5.98397	3.53158	26
chr1	32129401	32129736	ALL_peaks_peak_1426	213	.	10.2951	24.769	21.321	221
chr1	32135530	32135902	ALL_peaks_peak_1427	95	.	6.41849	12.3381	9.51363	308
chr1	32136004	32136119	ALL_peaks_peak_1428	68	.	5.47833	9.56805	6.88216	61
chr1	32149616	32150018	ALL_peaks_peak_1429	219	.	10.6822	25.4642	21.9733	177
chr1	32180102	32180213	ALL_peaks_peak_1430	94	.	5.96388	12.317	9.49328	59
chr1	32180858	32180993	ALL_peaks_peak_1431	94	.	5.96388	12.317	9.49328	70
chr1	32181317	32181706	ALL_peaks_peak_1432	130	.	7.04702	16.0992	13.0882	85
chr1	32211144	32211212	ALL_peaks_peak_1433	26	.	3.77358	5.03199	2.67314	41
chr1	32211322	32211658	ALL_peaks_peak_1434	291	.	13.2405	33.1567	29.16	74
chr1	32228325	32228471	ALL_peaks_peak_1435	46	.	4.44219	7.14966	4.6179	92
chr1	32230206	32230273	ALL_peaks_peak_1436	24	.	3.47573	4.76684	2.42785	16
chr1	32230884	32231016	ALL_peaks_peak_1437	135	.	7.55192	16.5858	13.5552	69
chr1	32253797	32253907	ALL_peaks_peak_1438	145	.	7.58283	17.5995	14.5192	55
chr1	32254650	32254791	ALL_peaks_peak_1439	96	.	6.0778	12.5317	9.69901	60
chr1	32254897	32255230	ALL_peaks_peak_1440	125	.	6.98609	15.5284	12.5485	151
chr1	32281574	32281937	ALL_peaks_peak_1441	242	.	11.0494	27.9377	24.2983	47
chr1	32346606	32346861	ALL_peaks_peak_1442	107	.	7.19476	13.6746	10.7774	119
chr1	32398100	32398320	ALL_peaks_peak_1443	50	.	4.40359	7.6637	5.09152	105
chr1	32405381	32405661	ALL_peaks_peak_1444	291	.	11.4672	33.1297	29.1346	208
chr1	32421759	32421863	ALL_peaks_peak_1445	97	.	6.81609	12.6089	9.76383	51
chr1	32429760	32430249	ALL_peaks_peak_1446	386	.	13.9187	43.467	38.6044	117
chr1	32443369	32443641	ALL_peaks_peak_1447	389	.	14.8761	43.8817	38.9824	151
chr1	32469263	32469513	ALL_peaks_peak_1448	402	.	15.232	45.2953	40.2791	100
chr1	32528384	32528465	ALL_peaks_peak_1449	39	.	4.02878	6.42793	3.94995	56
chr1	32529068	32529458	ALL_peaks_peak_1450	236	.	10.0528	27.2454	23.6524	139
chr1	32538195	32538311	ALL_peaks_peak_1451	31	.	3.93532	5.51616	3.10885	16
chr1	32538435	32538664	ALL_peaks_peak_1452	89	.	6.32022	11.7641	8.96321	99
chr1	32569935	32570043	ALL_peaks_peak_1453	70	.	5.37159	9.73389	7.04085	30
chr1	32573468	32573666	ALL_peaks_peak_1454	124	.	6.68628	15.3923	12.418	139
chr1	32574112	32574207	ALL_peaks_peak_1455	16	.	2.97877	3.93058	1.68088	1
chr1	32575068	32575321	ALL_peaks_peak_1456	160	.	7.89266	19.1791	16.0251	40
chr1	32593509	32593961	ALL_peaks_peak_1457	225	.	10.3486	26.0411	22.5201	178
chr1	32599176	32599362	ALL_peaks_peak_1458	178	.	9.50362	21.1037	17.8508	70
chr1	32604641	32604814	ALL_peaks_peak_1459	82	.	6.08185	10.9654	8.2083	31
chr1	32608495	32608615	ALL_peaks_peak_1460	35	.	4.05378	5.95399	3.5031	29
chr1	32645181	32645305	ALL_peaks_peak_1461	42	.	4.54406	6.75426	4.24317	42
chr1	32671064	32671263	ALL_peaks_peak_1462	68	.	5.42925	9.4839	6.81267	47
chr1	32681310	32681468	ALL_peaks_peak_1463	230	.	10.9867	26.6067	23.0554	92
chr1	32687940	32688021	ALL_peaks_peak_1464	50	.	4.92273	7.65747	5.08577	26
chr1	32689476	32689542	ALL_peaks_peak_1465	34	.	4.16539	5.88505	3.43822	20
chr1	32705982	32706444	ALL_peaks_peak_1466	47	.	4.54693	7.32922	4.78795	176
chr1	32713744	32714146	ALL_peaks_peak_1467	140	.	8.13238	17.1456	14.084	259
chr1	32714283	32714357	ALL_peaks_peak_1468	54	.	4.95015	8.01011	5.4214	43
chr1	32782076	32782494	ALL_peaks_peak_1469	229	.	10.5743	26.4588	22.9158	179
chr1	32800828	32800918	ALL_peaks_peak_1470	19	.	3.40805	4.26042	1.95847	75
chr1	32816793	32817130	ALL_peaks_peak_1471	78	.	6.05875	10.5485	7.80868	41
chr1	32837956	32838053	ALL_peaks_peak_1472	78	.	6.05875	10.5485	7.80868	50
chr1	32860062	32860428	ALL_peaks_peak_1473	97	.	6.54992	12.5677	9.73344	63
chr1	32866343	32866976	ALL_peaks_peak_1474	277	.	11.0138	31.5895	27.7103	255
chr1	32879503	32880097	ALL_peaks_peak_1475	311	.	12.2403	35.3091	31.1427	229
chr1	32913871	32914282	ALL_peaks_peak_1476	386	.	11.7451	43.5338	38.6642	213
chr1	32914787	32915298	ALL_peaks_peak_1477	138	.	6.3527	16.8603	13.818	133
chr1	32930427	32930615	ALL_peaks_peak_1478	78	.	6.05875	10.5485	7.80868	155
chr1	32966418	32966605	ALL_peaks_peak_1479	46	.	4.65083	7.21146	4.67663	165
chr1	32985951	32986348	ALL_peaks_peak_1480	337	.	12.686	38.2059	33.7981	257
chr1	32986937	32987036	ALL_peaks_peak_1481	72	.	5.30067	9.95862	7.25572	44
chr1	33004720	33004799	ALL_peaks_peak_1482	41	.	4.50586	6.69251	4.19884	56
chr1	33054149	33054215	ALL_peaks_peak_1483	59	.	5.3014	8.59228	5.96277	36
chr1	33064927	33065019	ALL_peaks_peak_1484	117	.	7.54717	14.7176	11.7783	41
chr1	33077773	33078002	ALL_peaks_peak_1485	124	.	7.676	15.3971	12.4227	89
chr1	33085833	33085965	ALL_peaks_peak_1486	179	.	9.5497	21.1844	17.9279	63
chr1	33091914	33092013	ALL_peaks_peak_1487	78	.	6.05875	10.5485	7.80868	49
chr1	33116137	33116269	ALL_peaks_peak_1488	81	.	6.06753	10.941	8.18499	45
chr1	33116688	33116761	ALL_peaks_peak_1489	38	.	4.2729	6.3139	3.84258	12
chr1	33177717	33178084	ALL_peaks_peak_1490	65	.	5.06525	9.18632	6.52941	238
chr1	33182317	33182545	ALL_peaks_peak_1491	123	.	7.11898	15.3245	12.353	48
chr1	33194995	33195075	ALL_peaks_peak_1492	78	.	6.05875	10.5485	7.80868	49
chr1	33209479	33209610	ALL_peaks_peak_1493	67	.	5.57704	9.3854	6.71899	71
chr1	33225429	33225495	ALL_peaks_peak_1494	25	.	3.58797	4.95166	2.59901	2
chr1	33226597	33226711	ALL_peaks_peak_1495	51	.	4.78273	7.72925	5.15387	52
chr1	33238667	33239024	ALL_peaks_peak_1496	196	.	9.62496	22.9792	19.625	130
chr1	33252657	33252817	ALL_peaks_peak_1497	248	.	11.3504	28.4874	24.8167	63
chr1	33283054	33283237	ALL_peaks_peak_1498	164	.	8.39135	19.6255	16.4448	86
chr1	33294056	33294203	ALL_peaks_peak_1499	248	.	11.3762	28.5343	24.8612	60
chr1	33338227	33338693	ALL_peaks_peak_1500	128	.	6.89313	15.7997	12.8084	227
chr1	33342201	33342512	ALL_peaks_peak_1501	187	.	8.56306	22.0476	18.7448	222
chr1	33352245	33352418	ALL_peaks_peak_1502	161	.	9.08812	19.3145	16.1467	117
chr1	33358514	33358989	ALL_peaks_peak_1503	123	.	7.62084	15.3019	12.3311	317
chr1	33369808	33369896	ALL_peaks_peak_1504	128	.	7.95211	15.8712	12.8691	57
chr1	33398844	33398924	ALL_peaks_peak_1505	44	.	4.36899	7.02344	4.49832	29
chr1	33399059	33399511	ALL_peaks_peak_1506	296	.	12.096	33.7109	29.6692	129
chr1	33429451	33429523	ALL_peaks_peak_1507	60	.	4.99313	8.72553	6.08988	36
chr1	33430431	33430665	ALL_peaks_peak_1508	176	.	8.79231	20.8966	17.6527	138
chr1	33458099	33458259	ALL_peaks_peak_1509	78	.	6.05875	10.5485	7.80868	97
chr1	33466996	33467164	ALL_peaks_peak_1510	184	.	9.84547	21.6995	18.4122	87
chr1	33472925	33473288	ALL_peaks_peak_1511	301	.	11.6876	34.2145	30.1353	75
chr1	33474226	33474531	ALL_peaks_peak_1512	141	.	7.37003	17.1896	14.1261	134
chr1	33490626	33490704	ALL_peaks_peak_1513	59	.	5.3014	8.59228	5.96277	40
chr1	33490964	33491035	ALL_peaks_peak_1514	68	.	5.68008	9.55656	6.87133	41
chr1	33502471	33502737	ALL_peaks_peak_1515	122	.	7.28573	15.1723	12.2068	149
chr1	33516298	33516489	ALL_peaks_peak_1516	239	.	9.3693	27.5755	23.9645	85
chr1	33520829	33521187	ALL_peaks_peak_1517	292	.	10.3437	33.26	29.2495	87
chr1	33521288	33521488	ALL_peaks_peak_1518	156	.	7.44086	18.7627	15.6267	107
chr1	33546517	33546726	ALL_peaks_peak_1519	150	.	8.42697	18.1612	15.0497	148
chr1	33551919	33552364	ALL_peaks_peak_1520	223	.	10.5665	25.8491	22.3382	237
chr1	33560537	33560874	ALL_peaks_peak_1521	342	.	13.3094	38.7436	34.2856	255
chr1	33577534	33577886	ALL_peaks_peak_1522	301	.	12.7235	34.2304	30.1495	245
chr1	33585570	33585667	ALL_peaks_peak_1523	68	.	5.68008	9.55656	6.87133	59
chr1	33592725	33593187	ALL_peaks_peak_1524	391	.	13.5399	44.1188	39.1995	328
chr1	33603569	33603662	ALL_peaks_peak_1525	118	.	7.57344	14.7624	11.8126	45
chr1	33613652	33613811	ALL_peaks_peak_1526	176	.	9.0604	20.8552	17.6131	55
chr1	33615564	33615730	ALL_peaks_peak_1527	77	.	5.79453	10.4729	7.74656	121
chr1	33649316	33649402	ALL_peaks_peak_1528	70	.	5.40541	9.79367	7.0979	52
chr1	33684237	33684532	ALL_peaks_peak_1529	239	.	10.2076	27.5501	23.94	244
chr1	33685599	33685732	ALL_peaks_peak_1530	32	.	3.72685	5.64468	3.22885	93
chr1	33721100	33721327	ALL_peaks_peak_1531	83	.	6.16926	11.114	8.35055	64
chr1	33722552	33722687	ALL_peaks_peak_1532	56	.	5.10502	8.26788	5.66624	98
chr1	33761036	33761355	ALL_peaks_peak_1533	281	.	11.596	32.1015	28.1795	232
chr1	33764271	33764522	ALL_peaks_peak_1534	140	.	7.58311	17.12	14.0594	179
chr1	33833464	33833770	ALL_peaks_peak_1535	304	.	13.6322	34.5214	30.4131	80
chr1	33844724	33844793	ALL_peaks_peak_1536	50	.	4.92273	7.65747	5.08577	40
chr1	33896545	33896797	ALL_peaks_peak_1537	192	.	9.37844	22.5264	19.2015	199
chr1	33921506	33921834	ALL_peaks_peak_1538	314	.	13.4991	35.6488	31.4559	115
chr1	33936157	33936550	ALL_peaks_peak_1539	370	.	12.7452	41.7471	37.0325	98
chr1	33937969	33938253	ALL_peaks_peak_1540	227	.	9.28409	26.2601	22.7276	168
chr1	33978346	33978490	ALL_peaks_peak_1541	34	.	4.16539	5.88505	3.43822	119
chr1	34078398	34078926	ALL_peaks_peak_1542	316	.	12.8535	35.8182	31.6123	260
chr1	34087166	34087234	ALL_peaks_peak_1543	59	.	5.3014	8.59228	5.96277	22
chr1	34098668	34098901	ALL_peaks_peak_1544	335	.	11.8832	37.8906	33.5093	125
chr1	34100523	34100721	ALL_peaks_peak_1545	144	.	7.07643	17.5387	14.4612	111
chr1	34106759	34106949	ALL_peaks_peak_1546	244	.	11.5025	28.141	24.4894	125
chr1	34119968	34120104	ALL_peaks_peak_1547	128	.	7.95211	15.8712	12.8691	83
chr1	34201132	34201455	ALL_peaks_peak_1548	191	.	9.65251	22.4701	19.1479	270
chr1	34308054	34308173	ALL_peaks_peak_1549	78	.	6.05875	10.5485	7.80868	60
chr1	34341623	34341691	ALL_peaks_peak_1550	42	.	4.54406	6.75426	4.24317	24
chr1	34479713	34479879	ALL_peaks_peak_1551	230	.	11.3602	26.6609	23.099	60
chr1	34579608	34579757	ALL_peaks_peak_1552	139	.	8.33078	17	13.9442	83
chr1	34622484	34622551	ALL_peaks_peak_1553	68	.	5.68008	9.55656	6.87133	28
chr1	34716841	34716944	ALL_peaks_peak_1554	87	.	6.43742	11.5664	8.7735	59
chr1	34837582	34837681	ALL_peaks_peak_1555	50	.	4.92273	7.65747	5.08577	44
chr1	34885411	34885584	ALL_peaks_peak_1556	139	.	8.33078	17	13.9442	59
chr1	34925957	34926107	ALL_peaks_peak_1557	68	.	5.68008	9.55656	6.87133	97
chr1	35012709	35012827	ALL_peaks_peak_1558	77	.	6.00781	10.4634	7.7376	57
chr1	35014930	35015043	ALL_peaks_peak_1559	106	.	7.09909	13.5121	10.6302	63
chr1	35057946	35058081	ALL_peaks_peak_1560	158	.	8.92326	19.0294	15.8819	74
chr1	35063499	35063910	ALL_peaks_peak_1561	267	.	11.4467	30.5448	26.7332	184
chr1	35111653	35111767	ALL_peaks_peak_1562	153	.	8.60647	18.477	15.3528	59
chr1	35147057	35147687	ALL_peaks_peak_1563	318	.	12.6131	36.0337	31.8063	208
chr1	35161952	35162089	ALL_peaks_peak_1564	118	.	7.57344	14.7624	11.8126	100
chr1	35197180	35197246	ALL_peaks_peak_1565	59	.	5.3014	8.59228	5.96277	16
chr1	35208355	35208768	ALL_peaks_peak_1566	139	.	8.02009	16.948	13.9022	93
chr1	35225488	35225574	ALL_peaks_peak_1567	87	.	6.43742	11.5664	8.7735	35
chr1	35247783	35247956	ALL_peaks_peak_1568	30	.	3.87133	5.41293	3.01199	15
chr1	35252132	35252392	ALL_peaks_peak_1569	343	.	12.9824	38.7954	34.3332	102
chr1	35253796	35253953	ALL_peaks_peak_1570	158	.	8.30194	18.9484	15.8043	97
chr1	35318234	35318568	ALL_peaks_peak_1571	550	.	17.9479	60.7344	55.0647	170
chr1	35325356	35325843	ALL_peaks_peak_1572	273	.	11.4757	31.2331	27.3768	143
chr1	35331735	35332362	ALL_peaks_peak_1573	142	.	7.94807	17.307	14.2389	388
chr1	35350584	35350717	ALL_peaks_peak_1574	150	.	8.70945	18.1481	15.037	88
chr1	35497354	35497698	ALL_peaks_peak_1575	76	.	5.93428	10.3403	7.62003	300
chr1	35578354	35578559	ALL_peaks_peak_1576	178	.	9.18242	21.0755	17.8237	76
chr1	35657746	35657831	ALL_peaks_peak_1577	25	.	3.58797	4.95166	2.59901	25
chr1	35658761	35659044	ALL_peaks_peak_1578	104	.	6.72631	13.2962	10.4233	122
chr1	35667790	35668112	ALL_peaks_peak_1579	477	.	16.1965	53.2554	47.788	109
chr1	35686671	35686891	ALL_peaks_peak_1580	364	.	14.1689	41.0915	36.4349	106
chr1	35730635	35730785	ALL_peaks_peak_1581	68	.	5.42925	9.4839	6.81267	62
chr1	35734139	35734326	ALL_peaks_peak_1582	171	.	9.06618	20.3312	17.1198	73
chr1	35764212	35764564	ALL_peaks_peak_1583	321	.	12.8213	36.4341	32.1753	122
chr1	35765893	35765978	ALL_peaks_peak_1584	61	.	5.02418	8.7802	6.14228	57
chr1	35811032	35811171	ALL_peaks_peak_1585	97	.	6.81609	12.6089	9.76383	84
chr1	35916623	35917022	ALL_peaks_peak_1586	204	.	9.45987	23.7937	20.4012	215
chr1	35917924	35917990	ALL_peaks_peak_1587	50	.	4.54078	7.6145	5.05771	26
chr1	35920528	35920656	ALL_peaks_peak_1588	66	.	5.11555	9.27702	6.61576	74
chr1	35971576	35971971	ALL_peaks_peak_1589	53	.	4.91573	7.95257	5.36649	163
chr1	35972291	35972380	ALL_peaks_peak_1590	62	.	5.25468	8.84511	6.20417	54
chr1	36010738	36010946	ALL_peaks_peak_1591	264	.	11.9382	30.1813	26.4005	91
chr1	36023242	36023374	ALL_peaks_peak_1592	102	.	6.86218	13.1074	10.2425	50
chr1	36030373	36030491	ALL_peaks_peak_1593	252	.	10.945	28.9718	25.2715	45
chr1	36034447	36034758	ALL_peaks_peak_1594	199	.	9.23664	23.3666	19.995	251
chr1	36111826	36112092	ALL_peaks_peak_1595	128	.	7.16503	15.8666	12.8691	58
chr1	36181080	36181390	ALL_peaks_peak_1596	270	.	11.6174	30.8658	27.0335	182
chr1	36192437	36192919	ALL_peaks_peak_1597	280	.	12.2158	31.9755	28.0617	221
chr1	36193019	36193139	ALL_peaks_peak_1598	35	.	4.05378	5.95399	3.5031	73
chr1	36234996	36235196	ALL_peaks_peak_1599	29	.	3.82689	5.34104	2.94479	54
chr1	36235562	36235693	ALL_peaks_peak_1600	72	.	5.31099	9.97749	7.27366	80
chr1	36240337	36240692	ALL_peaks_peak_1601	232	.	10.449	26.8225	23.2522	120
chr1	36250894	36250972	ALL_peaks_peak_1602	59	.	5.3014	8.59228	5.96277	27
chr1	36323435	36323680	ALL_peaks_peak_1603	244	.	11.5025	28.141	24.4894	188
chr1	36348497	36348769	ALL_peaks_peak_1604	219	.	10.9815	25.3981	21.9106	201
chr1	36404617	36404742	ALL_peaks_peak_1605	150	.	8.70945	18.1481	15.037	61
chr1	36501806	36501885	ALL_peaks_peak_1606	59	.	5.3014	8.59228	5.96277	29
chr1	36554281	36554492	ALL_peaks_peak_1607	229	.	11.2368	26.4449	22.9027	91
chr1	36562707	36562887	ALL_peaks_peak_1608	91	.	5.59739	11.9922	9.18247	118
chr1	36565280	36565477	ALL_peaks_peak_1609	215	.	8.93495	24.9707	21.5127	86
chr1	36565625	36565815	ALL_peaks_peak_1610	127	.	6.62623	15.7112	12.7236	70
chr1	36600299	36600890	ALL_peaks_peak_1611	164	.	8.64822	19.5807	16.4022	202
chr1	36615094	36615444	ALL_peaks_peak_1612	300	.	11.0143	34.1039	30.0332	134
chr1	36616482	36616706	ALL_peaks_peak_1613	83	.	5.33401	11.0961	8.33336	99
chr1	36635232	36635368	ALL_peaks_peak_1614	78	.	6.05875	10.5485	7.80868	81
chr1	36653461	36654292	ALL_peaks_peak_1615	284	.	11.4403	32.4372	28.4919	477
chr1	36666249	36666329	ALL_peaks_peak_1616	50	.	4.92273	7.65747	5.08577	47
chr1	36675508	36675593	ALL_peaks_peak_1617	107	.	7.19476	13.6746	10.7774	34
chr1	36683337	36683531	ALL_peaks_peak_1618	172	.	9.46679	20.4986	17.2718	96
chr1	36689843	36690045	ALL_peaks_peak_1619	58	.	4.64506	8.41499	5.80578	112
chr1	36690485	36690876	ALL_peaks_peak_1620	334	.	12.1425	37.772	33.4002	91
chr1	36734560	36734863	ALL_peaks_peak_1621	70	.	5.57919	9.74032	7.04687	167
chr1	36735099	36735300	ALL_peaks_peak_1622	23	.	3.52759	4.64283	2.31307	141
chr1	36751034	36751618	ALL_peaks_peak_1623	306	.	12.3305	34.8209	30.6913	211
chr1	36765556	36765954	ALL_peaks_peak_1624	285	.	11.8101	32.5127	28.5624	98
chr1	36771946	36772034	ALL_peaks_peak_1625	32	.	4.03049	5.66916	3.2518	47
chr1	36772563	36772747	ALL_peaks_peak_1626	66	.	5.50944	9.27274	6.61176	136
chr1	36808386	36808574	ALL_peaks_peak_1627	128	.	7.95211	15.8712	12.8691	93
chr1	36821455	36821621	ALL_peaks_peak_1628	68	.	5.68008	9.55656	6.87133	130
chr1	36834714	36835058	ALL_peaks_peak_1629	384	.	15.3428	43.2788	38.4316	98
chr1	36840215	36840384	ALL_peaks_peak_1630	78	.	6.05875	10.5485	7.80868	64
chr1	36850714	36850780	ALL_peaks_peak_1631	40	.	4.22215	6.4961	4.01406	35
chr1	36851671	36851882	ALL_peaks_peak_1632	39	.	4.21312	6.48083	3.99976	155
chr1	36852188	36852339	ALL_peaks_peak_1633	32	.	3.90574	5.70833	3.28822	21
chr1	36886491	36886842	ALL_peaks_peak_1634	318	.	13.0191	36.1302	31.895	98
chr1	36902657	36902798	ALL_peaks_peak_1635	50	.	4.92273	7.65747	5.08577	20
chr1	36912064	36912170	ALL_peaks_peak_1636	97	.	5.87356	12.5383	9.70542	46
chr1	36914357	36914515	ALL_peaks_peak_1637	88	.	5.59672	11.6127	8.81803	117
chr1	36915590	36915697	ALL_peaks_peak_1638	155	.	7.65069	18.7019	15.5682	43
chr1	36916044	36916117	ALL_peaks_peak_1639	51	.	4.43582	7.72303	5.1481	31
chr1	36952678	36952871	ALL_peaks_peak_1640	59	.	5.3014	8.59228	5.96277	137
chr1	36982041	36982184	ALL_peaks_peak_1641	183	.	9.81132	21.6403	18.3628	83
chr1	36994138	36994223	ALL_peaks_peak_1642	78	.	6.05875	10.5485	7.80868	47
chr1	37008649	37008742	ALL_peaks_peak_1643	128	.	7.95211	15.8712	12.8691	55
chr1	37019334	37019787	ALL_peaks_peak_1644	226	.	10.4153	26.1649	22.6376	277
chr1	37041559	37041936	ALL_peaks_peak_1645	157	.	8.85805	18.9162	15.7735	297
chr1	37074631	37075122	ALL_peaks_peak_1646	261	.	11.4409	29.9035	26.1398	393
chr1	37115995	37116459	ALL_peaks_peak_1647	226	.	10.7356	26.1552	22.6289	269
chr1	37165661	37165738	ALL_peaks_peak_1648	40	.	4.24033	6.52679	4.04283	56
chr1	37169247	37169574	ALL_peaks_peak_1649	168	.	8.35921	20.0801	16.8801	223
chr1	37171346	37171482	ALL_peaks_peak_1650	123	.	7.09001	15.2711	12.3016	97
chr1	37197451	37197574	ALL_peaks_peak_1651	172	.	9.46679	20.4986	17.2718	57
chr1	37217139	37217512	ALL_peaks_peak_1652	158	.	8.63797	19.0449	15.8968	253
chr1	37329908	37330001	ALL_peaks_peak_1653	68	.	5.68008	9.55656	6.87133	35
chr1	37351285	37351373	ALL_peaks_peak_1654	42	.	4.54406	6.75426	4.24317	35
chr1	37448032	37448128	ALL_peaks_peak_1655	59	.	5.3014	8.59228	5.96277	57
chr1	37467437	37467560	ALL_peaks_peak_1656	94	.	6.64354	12.3168	9.49322	78
chr1	37468643	37468897	ALL_peaks_peak_1657	332	.	14.2211	37.6422	33.2806	65
chr1	37494659	37494821	ALL_peaks_peak_1658	87	.	6.43742	11.5664	8.7735	128
chr1	37501732	37501842	ALL_peaks_peak_1659	36	.	4.0074	6.13068	3.66992	101
chr1	37503913	37504130	ALL_peaks_peak_1660	228	.	10.2142	26.3789	22.8399	85
chr1	37551138	37551272	ALL_peaks_peak_1661	59	.	5.3014	8.59228	5.96277	81
chr1	37562218	37562377	ALL_peaks_peak_1662	118	.	7.57344	14.7624	11.8126	117
chr1	37642958	37643440	ALL_peaks_peak_1663	242	.	11.3411	27.8522	24.225	94
chr1	37686539	37686676	ALL_peaks_peak_1664	78	.	6.05875	10.5485	7.80868	82
chr1	37774330	37774418	ALL_peaks_peak_1665	78	.	6.05875	10.5485	7.80868	43
chr1	37774551	37774701	ALL_peaks_peak_1666	68	.	5.68008	9.55656	6.87133	125
chr1	37789530	37789645	ALL_peaks_peak_1667	167	.	9.13809	19.9271	16.7337	51
chr1	37808475	37808764	ALL_peaks_peak_1668	139	.	8.33078	17	13.9442	65
chr1	37856959	37857056	ALL_peaks_peak_1669	50	.	4.92273	7.65747	5.08577	45
chr1	37860824	37860989	ALL_peaks_peak_1670	59	.	5.3014	8.59228	5.96277	44
chr1	37868843	37869093	ALL_peaks_peak_1671	78	.	6.05875	10.5485	7.80868	201
chr1	37899987	37900368	ALL_peaks_peak_1672	278	.	12.0805	31.7266	27.8376	101
chr1	37913739	37913991	ALL_peaks_peak_1673	175	.	9.34579	20.8264	17.5855	212
chr1	37920395	37920695	ALL_peaks_peak_1674	277	.	11.055	31.6721	27.7871	234
chr1	37924274	37924439	ALL_peaks_peak_1675	71	.	5.0637	9.86266	7.16408	58
chr1	37939384	37939457	ALL_peaks_peak_1676	66	.	5.14621	9.33215	6.6684	29
chr1	37952877	37953456	ALL_peaks_peak_1677	188	.	8.12328	22.1878	18.8789	289
chr1	37961589	37961811	ALL_peaks_peak_1678	89	.	5.8782	11.7641	8.96321	47
chr1	37964745	37965086	ALL_peaks_peak_1679	45	.	4.40529	7.08611	4.55767	124
chr1	37974910	37975072	ALL_peaks_peak_1680	287	.	11.9324	32.7462	28.7794	79
chr1	37980226	37980748	ALL_peaks_peak_1681	69	.	5.33819	9.67474	6.98439	185
chr1	38000136	38000384	ALL_peaks_peak_1682	73	.	5.54505	10.0392	7.33259	65
chr1	38003168	38003281	ALL_peaks_peak_1683	65	.	5.27565	9.21906	6.56063	65
chr1	38019888	38020026	ALL_peaks_peak_1684	109	.	7.05517	13.8717	10.9667	54
chr1	38027514	38027596	ALL_peaks_peak_1685	95	.	6.70891	12.4277	9.59941	34
chr1	38037260	38037340	ALL_peaks_peak_1686	107	.	7.19476	13.6746	10.7774	50
chr1	38061517	38061731	ALL_peaks_peak_1687	64	.	5.43045	9.14069	6.48584	157
chr1	38068621	38069008	ALL_peaks_peak_1688	212	.	9.96144	24.7371	21.2905	295
chr1	38077335	38077427	ALL_peaks_peak_1689	207	.	10.6028	24.1499	20.7324	42
chr1	38087936	38088055	ALL_peaks_peak_1690	26	.	3.78672	5.05267	2.67471	100
chr1	38121041	38121154	ALL_peaks_peak_1691	207	.	10.6028	24.1499	20.7324	60
chr1	38148129	38148478	ALL_peaks_peak_1692	326	.	12.7652	37.0039	32.6985	91
chr1	38156269	38156418	ALL_peaks_peak_1693	56	.	4.37403	8.19954	5.60148	67
chr1	38157364	38157430	ALL_peaks_peak_1694	49	.	4.151	7.47219	4.92332	26
chr1	38157867	38158171	ALL_peaks_peak_1695	238	.	9.29368	27.4122	23.8099	192
chr1	38273336	38273461	ALL_peaks_peak_1696	19	.	3.1298	4.18811	1.91494	66
chr1	38276813	38277044	ALL_peaks_peak_1697	271	.	10.6949	30.9445	27.1078	99
chr1	38283265	38283422	ALL_peaks_peak_1698	276	.	12.6724	31.4929	27.62	84
chr1	38325283	38326162	ALL_peaks_peak_1699	207	.	8.82842	24.2007	20.7805	669
chr1	38333621	38333735	ALL_peaks_peak_1700	68	.	5.68008	9.55656	6.87133	64
chr1	38341658	38341776	ALL_peaks_peak_1701	304	.	13.6322	34.5214	30.4131	55
chr1	38356127	38356485	ALL_peaks_peak_1702	389	.	15.2698	43.8832	38.9834	113
chr1	38385052	38385199	ALL_peaks_peak_1703	331	.	14.1192	37.4592	33.1129	87
chr1	38397425	38397698	ALL_peaks_peak_1704	283	.	11.3742	32.307	28.3705	128
chr1	38401814	38401899	ALL_peaks_peak_1705	63	.	4.97716	9.02667	6.37726	22
chr1	38412708	38412845	ALL_peaks_peak_1706	150	.	8.70945	18.1481	15.037	79
chr1	38440790	38441010	ALL_peaks_peak_1707	215	.	10.4131	24.9818	21.5228	65
chr1	38455675	38456132	ALL_peaks_peak_1708	352	.	13.1241	39.7665	35.2247	162
chr1	38478226	38478452	ALL_peaks_peak_1709	130	.	7.03393	16.0738	13.0639	61
chr1	38480001	38480097	ALL_peaks_peak_1710	139	.	6.83694	17.0396	13.9822	61
chr1	38484698	38484955	ALL_peaks_peak_1711	238	.	10.1685	27.4732	23.8677	64
chr1	38492386	38492515	ALL_peaks_peak_1712	177	.	9.45798	21.0236	17.7744	65
chr1	38503433	38503558	ALL_peaks_peak_1713	68	.	5.45368	9.52581	6.85254	63
chr1	38506285	38506437	ALL_peaks_peak_1714	274	.	12.2326	31.3568	27.4926	61
chr1	38518925	38519309	ALL_peaks_peak_1715	102	.	6.86218	13.1074	10.2425	56
chr1	38537686	38537897	ALL_peaks_peak_1716	161	.	9.08812	19.3145	16.1467	52
chr1	38604241	38604553	ALL_peaks_peak_1717	241	.	11.3146	27.8047	24.1801	126
chr1	38618542	38618750	ALL_peaks_peak_1718	211	.	10.5493	24.6392	21.1979	84
chr1	38955567	38955714	ALL_peaks_peak_1719	218	.	10.9434	25.3316	21.8547	92
chr1	38966001	38966272	ALL_peaks_peak_1720	116	.	7.45434	14.5592	11.6265	161
chr1	38968633	38968705	ALL_peaks_peak_1721	48	.	4.78645	7.43456	4.8874	32
chr1	38993041	38993250	ALL_peaks_peak_1722	207	.	9.97871	24.1935	20.774	115
chr1	38995383	38995542	ALL_peaks_peak_1723	92	.	6.25123	12.0438	9.23189	62
chr1	39052707	39053133	ALL_peaks_peak_1724	287	.	12.2533	32.6973	28.7347	214
chr1	39073860	39073926	ALL_peaks_peak_1725	68	.	5.68008	9.55656	6.87133	47
chr1	39074045	39074337	ALL_peaks_peak_1726	127	.	7.88525	15.7568	12.7675	63
chr1	39081549	39081615	ALL_peaks_peak_1727	34	.	4.16539	5.88505	3.43822	35
chr1	39300845	39301390	ALL_peaks_peak_1728	362	.	14.0791	40.921	36.2785	257
chr1	39325401	39325570	ALL_peaks_peak_1729	59	.	5.11282	8.60469	5.97462	124
chr1	39329956	39330024	ALL_peaks_peak_1730	63	.	5.13051	8.9666	6.32002	54
chr1	39330782	39330968	ALL_peaks_peak_1731	157	.	8.57927	18.9402	15.7966	129
chr1	39338976	39339232	ALL_peaks_peak_1732	83	.	6.15451	11.089	8.32664	43
chr1	39357334	39357676	ALL_peaks_peak_1733	175	.	9.30166	20.7485	17.5111	263
chr1	39384908	39384977	ALL_peaks_peak_1734	59	.	5.3014	8.59228	5.96277	41
chr1	39416892	39416969	ALL_peaks_peak_1735	68	.	5.68008	9.55656	6.87133	48
chr1	39429927	39430089	ALL_peaks_peak_1736	172	.	9.46679	20.4986	17.2718	103
chr1	39494300	39494560	ALL_peaks_peak_1737	118	.	7.57344	14.7624	11.8126	48
chr1	39510577	39510716	ALL_peaks_peak_1738	97	.	6.81609	12.6089	9.76383	38
chr1	39516807	39517096	ALL_peaks_peak_1739	84	.	6.2592	11.2663	8.49619	155
chr1	39554458	39554525	ALL_peaks_peak_1740	38	.	4.10768	6.30198	3.83128	9
chr1	39558133	39558315	ALL_peaks_peak_1741	292	.	11.223	33.2738	29.2622	69
chr1	39560416	39560674	ALL_peaks_peak_1742	63	.	4.49257	9.04706	6.39667	193
chr1	39564270	39564598	ALL_peaks_peak_1743	240	.	8.65783	27.6396	24.0248	222
chr1	39568160	39568588	ALL_peaks_peak_1744	210	.	8.22588	24.4947	21.0609	199
chr1	39582677	39582789	ALL_peaks_peak_1745	42	.	4.54406	6.75426	4.24317	20
chr1	39593715	39593791	ALL_peaks_peak_1746	45	.	4.22821	7.0565	4.5295	21
chr1	39594823	39594889	ALL_peaks_peak_1747	28	.	3.36425	5.21409	2.82609	32
chr1	39595231	39595422	ALL_peaks_peak_1748	174	.	7.66541	20.701	17.4656	91
chr1	39598892	39599054	ALL_peaks_peak_1749	136	.	6.26514	16.6589	13.6253	62
chr1	39602437	39602596	ALL_peaks_peak_1750	90	.	5.51406	11.825	9.02186	99
chr1	39602696	39602923	ALL_peaks_peak_1751	90	.	5.53236	11.8618	9.05724	177
chr1	39608441	39608775	ALL_peaks_peak_1752	192	.	9.41864	22.6005	19.2719	155
chr1	39618576	39618652	ALL_peaks_peak_1753	39	.	4.34436	6.43046	3.95226	23
chr1	39624038	39624183	ALL_peaks_peak_1754	91	.	6.40934	11.9172	9.11034	101
chr1	39649319	39649837	ALL_peaks_peak_1755	386	.	13.5847	43.5022	38.6363	244
chr1	39657368	39657570	ALL_peaks_peak_1756	317	.	10.4566	35.9734	31.7503	92
chr1	39657816	39658436	ALL_peaks_peak_1757	196	.	7.78648	22.9714	19.618	544
chr1	39670117	39670294	ALL_peaks_peak_1758	150	.	8.70945	18.1481	15.037	77
chr1	39699267	39699380	ALL_peaks_peak_1759	26	.	3.78672	5.05267	2.67471	103
chr1	39724241	39724768	ALL_peaks_peak_1760	210	.	9.53459	24.5006	21.0663	269
chr1	39732041	39732170	ALL_peaks_peak_1761	181	.	9.66687	21.389	18.1232	76
chr1	39820374	39820463	ALL_peaks_peak_1762	50	.	4.92273	7.65747	5.08577	34
chr1	39844038	39844404	ALL_peaks_peak_1763	222	.	10.5192	25.763	22.2565	97
chr1	39873570	39873712	ALL_peaks_peak_1764	121	.	6.55893	15.1384	12.1745	48
chr1	39876615	39876844	ALL_peaks_peak_1765	364	.	12.4669	41.1512	36.4888	73
chr1	39955502	39955580	ALL_peaks_peak_1766	50	.	4.92273	7.65747	5.08577	35
chr1	39972994	39973104	ALL_peaks_peak_1767	219	.	10.9815	25.3981	21.9106	55
chr1	40004972	40005308	ALL_peaks_peak_1768	339	.	13.4961	38.4059	33.9823	82
chr1	40042593	40042924	ALL_peaks_peak_1769	103	.	6.71141	13.2699	10.3982	229
chr1	40071715	40072356	ALL_peaks_peak_1770	306	.	11.6654	34.8183	30.6891	347
chr1	40105334	40105815	ALL_peaks_peak_1771	218	.	10.2663	25.3007	21.8254	374
chr1	40113536	40113611	ALL_peaks_peak_1772	50	.	4.92273	7.65747	5.08577	17
chr1	40119284	40119678	ALL_peaks_peak_1773	243	.	9.57179	28.0093	24.3656	75
chr1	40123838	40124008	ALL_peaks_peak_1774	342	.	11.9581	38.7124	34.2575	51
chr1	40138464	40138530	ALL_peaks_peak_1775	34	.	4.16539	5.88505	3.43822	39
chr1	40157074	40157197	ALL_peaks_peak_1776	107	.	7.19476	13.6746	10.7774	47
chr1	40165240	40165390	ALL_peaks_peak_1777	219	.	10.0276	25.4402	21.9505	57
chr1	40167443	40167763	ALL_peaks_peak_1778	230	.	10.0124	26.5786	23.0287	275
chr1	40183634	40183709	ALL_peaks_peak_1779	71	.	5.08157	9.89692	7.19657	40
chr1	40185767	40186168	ALL_peaks_peak_1780	311	.	11.3087	35.3665	31.1943	98
chr1	40264820	40265193	ALL_peaks_peak_1781	335	.	11.0231	37.9259	33.5414	230
chr1	40265285	40265983	ALL_peaks_peak_1782	154	.	6.93264	18.6166	15.4868	452
chr1	40282386	40282787	ALL_peaks_peak_1783	229	.	9.9736	26.503	22.9572	221
chr1	40283079	40283298	ALL_peaks_peak_1784	90	.	5.9011	11.8066	9.00414	82
chr1	40318011	40318346	ALL_peaks_peak_1785	52	.	4.68106	7.86075	5.27919	33
chr1	40318685	40318769	ALL_peaks_peak_1786	44	.	4.34216	6.97702	4.45434	31
chr1	40364767	40365009	ALL_peaks_peak_1787	72	.	5.11771	9.96603	7.26272	50
chr1	40367696	40367774	ALL_peaks_peak_1788	84	.	5.60632	11.255	8.48549	38
chr1	40367876	40368285	ALL_peaks_peak_1789	178	.	8.37848	21.1551	17.8999	220
chr1	40383657	40383748	ALL_peaks_peak_1790	47	.	4.37471	7.31972	4.77898	35
chr1	40385104	40385473	ALL_peaks_peak_1791	272	.	11.0613	31.0586	27.2139	226
chr1	40439259	40439782	ALL_peaks_peak_1792	162	.	8.57294	19.4441	16.2709	111
chr1	40446277	40446470	ALL_peaks_peak_1793	62	.	5.27909	8.88631	6.24352	63
chr1	40446623	40446700	ALL_peaks_peak_1794	46	.	4.65083	7.21146	4.67663	32
chr1	40483965	40484123	ALL_peaks_peak_1795	119	.	7.40793	14.9322	11.9761	112
chr1	40490404	40490611	ALL_peaks_peak_1796	42	.	4.54406	6.75426	4.24317	20
chr1	40496370	40496457	ALL_peaks_peak_1797	32	.	3.74101	5.66946	3.25195	48
chr1	40498045	40498366	ALL_peaks_peak_1798	248	.	10.4191	28.5639	24.8888	97
chr1	40506104	40506387	ALL_peaks_peak_1799	77	.	5.76858	10.428	7.70397	186
chr1	40544153	40544583	ALL_peaks_peak_1800	269	.	11.2455	30.7911	26.9637	233
chr1	40550298	40550799	ALL_peaks_peak_1801	321	.	12.4651	36.4173	32.1595	260
chr1	40563000	40563175	ALL_peaks_peak_1802	34	.	4.04476	5.93908	3.48923	49
chr1	40573394	40573542	ALL_peaks_peak_1803	50	.	4.92273	7.65747	5.08577	53
chr1	40599625	40599812	ALL_peaks_peak_1804	191	.	9.67452	22.5096	19.1854	82
chr1	40605798	40605934	ALL_peaks_peak_1805	69	.	4.79846	9.67585	6.9852	78
chr1	40606035	40606279	ALL_peaks_peak_1806	47	.	4.07225	7.3178	4.77725	11
chr1	40609605	40610066	ALL_peaks_peak_1807	339	.	11.48	38.322	33.9059	244
chr1	40618656	40618972	ALL_peaks_peak_1808	334	.	13.2159	37.8726	33.4928	210
chr1	40648793	40648940	ALL_peaks_peak_1809	152	.	8.52575	18.3353	15.2167	52
chr1	40663439	40663591	ALL_peaks_peak_1810	150	.	8.40748	18.1268	15.0245	103
chr1	40723532	40723919	ALL_peaks_peak_1811	109	.	6.77682	13.8151	10.9122	217
chr1	40754045	40754151	ALL_peaks_peak_1812	118	.	7.57344	14.7624	11.8126	55
chr1	40770785	40770884	ALL_peaks_peak_1813	53	.	4.89305	7.91461	5.33042	36
chr1	40771110	40771382	ALL_peaks_peak_1814	161	.	8.75779	19.2578	16.1002	214
chr1	40781060	40781260	ALL_peaks_peak_1815	228	.	10.5513	26.4164	22.8758	91
chr1	40781441	40781512	ALL_peaks_peak_1816	33	.	3.92259	5.7364	3.31446	12
chr1	40804473	40804930	ALL_peaks_peak_1817	269	.	10.9352	30.8091	26.9805	90
chr1	40870469	40870903	ALL_peaks_peak_1818	207	.	9.63451	24.1246	20.7156	225
chr1	40871614	40871745	ALL_peaks_peak_1819	29	.	3.66189	5.29856	2.90502	101
chr1	40904186	40904503	ALL_peaks_peak_1820	212	.	10.2719	24.7269	21.2808	96
chr1	40997253	40997340	ALL_peaks_peak_1821	42	.	4.21281	6.75194	4.24317	30
chr1	40997447	40997513	ALL_peaks_peak_1822	35	.	3.93534	6.00683	3.55319	26
chr1	40998463	40998738	ALL_peaks_peak_1823	278	.	11.4348	31.7895	27.8957	214
chr1	41048527	41048611	ALL_peaks_peak_1824	78	.	6.05875	10.5485	7.80868	39
chr1	41057795	41058106	ALL_peaks_peak_1825	455	.	16.1943	50.9298	45.5619	217
chr1	41077908	41078252	ALL_peaks_peak_1826	463	.	16.2387	51.7891	46.3801	236
chr1	41090730	41091001	ALL_peaks_peak_1827	279	.	12.8748	31.8499	27.9448	210
chr1	41096276	41096424	ALL_peaks_peak_1828	291	.	13.2535	33.1796	29.1749	80
chr1	41115810	41115920	ALL_peaks_peak_1829	55	.	5.05634	8.18706	5.58952	62
chr1	41117250	41117407	ALL_peaks_peak_1830	47	.	4.68401	7.26617	4.72825	19
chr1	41131361	41131427	ALL_peaks_peak_1831	66	.	5.11555	9.27702	6.61576	35
chr1	41134567	41135110	ALL_peaks_peak_1832	261	.	11.0974	29.8812	26.1186	166
chr1	41154210	41154289	ALL_peaks_peak_1833	66	.	5.53628	9.31751	6.65435	23
chr1	41174857	41174978	ALL_peaks_peak_1834	95	.	6.43283	12.3633	9.53762	56
chr1	41178150	41178274	ALL_peaks_peak_1835	36	.	4.14622	6.10634	3.64686	90
chr1	41188452	41188537	ALL_peaks_peak_1836	108	.	6.99007	13.7584	10.858	39
chr1	41191410	41191509	ALL_peaks_peak_1837	46	.	4.61812	7.15744	4.62525	61
chr1	41235623	41235744	ALL_peaks_peak_1838	127	.	7.109	15.7611	12.7716	39
chr1	41239809	41240106	ALL_peaks_peak_1839	142	.	7.4256	17.2971	14.2294	244
chr1	41243377	41243493	ALL_peaks_peak_1840	63	.	5.14139	8.9856	6.33817	37
chr1	41314281	41314630	ALL_peaks_peak_1841	345	.	12.1209	39.0611	34.5783	103
chr1	41315625	41316087	ALL_peaks_peak_1842	147	.	7.20869	17.8107	14.7218	238
chr1	41321296	41321386	ALL_peaks_peak_1843	97	.	6.81609	12.6089	9.76383	54
chr1	41327950	41328448	ALL_peaks_peak_1844	163	.	8.34003	19.5295	16.3531	353
chr1	41333963	41334279	ALL_peaks_peak_1845	239	.	10.5452	27.6038	23.9912	173
chr1	41388746	41388874	ALL_peaks_peak_1846	107	.	7.19476	13.6746	10.7774	77
chr1	41401055	41401123	ALL_peaks_peak_1847	78	.	6.05875	10.5485	7.80868	46
chr1	41407914	41407996	ALL_peaks_peak_1848	42	.	4.54406	6.75426	4.24317	17
chr1	41414460	41415032	ALL_peaks_peak_1849	221	.	8.73878	25.6443	22.1442	311
chr1	41418267	41418594	ALL_peaks_peak_1850	111	.	6.00759	14.0106	11.1005	61
chr1	41445008	41445074	ALL_peaks_peak_1851	23	.	3.56075	4.69551	2.36202	26
chr1	41445553	41445681	ALL_peaks_peak_1852	31	.	3.95399	5.54623	3.13692	57
chr1	41469348	41469693	ALL_peaks_peak_1853	165	.	9.02918	19.7363	16.5511	247
chr1	41488883	41489137	ALL_peaks_peak_1854	87	.	6.43742	11.5664	8.7735	185
chr1	41503918	41504006	ALL_peaks_peak_1855	78	.	6.05875	10.5485	7.80868	43
chr1	41582954	41583131	ALL_peaks_peak_1856	318	.	13.7571	36.1137	31.8805	80
chr1	41588912	41589216	ALL_peaks_peak_1857	342	.	13.6701	38.7344	34.2778	60
chr1	41657210	41657346	ALL_peaks_peak_1858	78	.	6.05875	10.5485	7.80868	45
chr1	41705873	41706406	ALL_peaks_peak_1859	274	.	10.872	31.3038	27.4433	215
chr1	41728681	41728922	ALL_peaks_peak_1860	118	.	7.06941	14.7831	11.8326	186
chr1	41733756	41734203	ALL_peaks_peak_1861	196	.	9.34288	23.0142	19.6586	282
chr1	41746007	41746143	ALL_peaks_peak_1862	76	.	5.73008	10.3614	7.64029	84
chr1	41748258	41748581	ALL_peaks_peak_1863	115	.	7.12589	14.4372	11.5095	250
chr1	41774436	41774550	ALL_peaks_peak_1864	98	.	6.41313	12.7393	9.88897	53
chr1	41779282	41779545	ALL_peaks_peak_1865	185	.	8.74942	21.8814	18.5859	175
chr1	41788625	41788845	ALL_peaks_peak_1866	286	.	12.1999	32.5982	28.642	115
chr1	41797083	41797171	ALL_peaks_peak_1867	68	.	5.68008	9.55656	6.87133	26
chr1	41806832	41806949	ALL_peaks_peak_1868	97	.	6.77558	12.5404	9.70744	59
chr1	41819466	41819791	ALL_peaks_peak_1869	112	.	6.9698	14.1604	11.2441	238
chr1	41825994	41826071	ALL_peaks_peak_1870	45	.	4.39616	7.07036	4.5427	60
chr1	41826722	41827005	ALL_peaks_peak_1871	132	.	7.36829	16.2464	13.2295	103
chr1	41880795	41880867	ALL_peaks_peak_1872	58	.	4.50405	8.45506	5.84393	42
chr1	41882736	41883035	ALL_peaks_peak_1873	98	.	5.75518	12.6944	9.84594	197
chr1	41884557	41884775	ALL_peaks_peak_1874	117	.	5.92443	14.6427	11.7065	98
chr1	41885026	41885268	ALL_peaks_peak_1875	45	.	3.81162	7.05467	4.52781	138
chr1	41889221	41889383	ALL_peaks_peak_1876	37	.	3.74719	6.16837	3.70549	59
chr1	41889475	41889578	ALL_peaks_peak_1877	45	.	4.06401	7.02831	4.50296	58
chr1	41898381	41898883	ALL_peaks_peak_1878	222	.	9.91051	25.7982	22.29	174
chr1	41941974	41942097	ALL_peaks_peak_1879	78	.	6.05875	10.5485	7.80868	57
chr1	41949585	41949651	ALL_peaks_peak_1880	27	.	3.7077	5.14743	2.76357	10
chr1	41950020	41950406	ALL_peaks_peak_1881	262	.	11.5154	30.0421	26.2692	97
chr1	41958006	41958181	ALL_peaks_peak_1882	263	.	10.5932	30.1248	26.3473	109
chr1	41961326	41961451	ALL_peaks_peak_1883	135	.	6.8351	16.5841	13.5536	63
chr1	41966201	41966363	ALL_peaks_peak_1884	63	.	4.79719	9.02001	6.37094	84
chr1	41967433	41967614	ALL_peaks_peak_1885	131	.	7.33855	16.1911	13.1765	61
chr1	41969586	41969686	ALL_peaks_peak_1886	195	.	9.28563	22.9063	19.563	52
chr1	41979198	41979268	ALL_peaks_peak_1887	51	.	4.26087	7.68559	5.11243	38
chr1	41980797	41981445	ALL_peaks_peak_1888	81	.	5.24607	10.9206	8.16537	481
chr1	41981662	41982100	ALL_peaks_peak_1889	200	.	8.43798	23.3805	20.008	277
chr1	42039843	42040221	ALL_peaks_peak_1890	239	.	9.65704	27.6108	23.9977	119
chr1	42044620	42045097	ALL_peaks_peak_1891	343	.	11.9984	38.799	34.3361	195
chr1	42065717	42065996	ALL_peaks_peak_1892	166	.	9.09422	19.8503	16.6605	55
chr1	42123603	42123680	ALL_peaks_peak_1893	78	.	6.05875	10.5485	7.80868	53
chr1	42138095	42138164	ALL_peaks_peak_1894	59	.	5.3014	8.59228	5.96277	56
chr1	42220114	42220356	ALL_peaks_peak_1895	68	.	5.68008	9.55656	6.87133	202
chr1	42255509	42255961	ALL_peaks_peak_1896	48	.	4.7633	7.39657	4.85141	19
chr1	42261115	42261448	ALL_peaks_peak_1897	150	.	8.44654	18.1957	15.0828	106
chr1	42277641	42277944	ALL_peaks_peak_1898	341	.	13.2552	38.639	34.1907	188
chr1	42289294	42289411	ALL_peaks_peak_1899	107	.	7.19476	13.6746	10.7774	53
chr1	42308095	42308178	ALL_peaks_peak_1900	59	.	5.3014	8.59228	5.96277	23
chr1	42326126	42326222	ALL_peaks_peak_1901	70	.	5.37159	9.73389	7.04085	55
chr1	42328042	42328121	ALL_peaks_peak_1902	26	.	3.47967	4.98767	2.63249	48
chr1	42333902	42334463	ALL_peaks_peak_1903	203	.	9.42192	23.7214	20.3323	508
chr1	42344236	42344314	ALL_peaks_peak_1904	130	.	7.81528	16.1082	13.0968	26
chr1	42347831	42347965	ALL_peaks_peak_1905	35	.	4.10875	6.04466	3.58877	7
chr1	42357352	42357519	ALL_peaks_peak_1906	139	.	8.02009	16.948	13.9022	103
chr1	42380373	42380768	ALL_peaks_peak_1907	78	.	5.08672	10.5991	7.85723	330
chr1	42384529	42384667	ALL_peaks_peak_1908	113	.	5.75767	14.2704	11.3496	47
chr1	42385576	42385959	ALL_peaks_peak_1909	45	.	3.95957	7.09475	4.56591	339
chr1	42391564	42391706	ALL_peaks_peak_1910	44	.	4.49174	6.94793	4.42672	46
chr1	42402044	42402171	ALL_peaks_peak_1911	103	.	6.68181	13.2177	10.3481	88
chr1	42450481	42450611	ALL_peaks_peak_1912	97	.	6.81609	12.6089	9.76383	34
chr1	42499058	42499136	ALL_peaks_peak_1913	91	.	6.18409	11.9249	9.11774	50
chr1	42501413	42501479	ALL_peaks_peak_1914	39	.	4.20413	6.46563	3.9853	26
chr1	42501583	42501740	ALL_peaks_peak_1915	33	.	3.93108	5.75052	3.32767	119
chr1	42538188	42538254	ALL_peaks_peak_1916	68	.	5.68008	9.55656	6.87133	39
chr1	42604385	42604492	ALL_peaks_peak_1917	97	.	6.81609	12.6089	9.76383	59
chr1	42612477	42612969	ALL_peaks_peak_1918	363	.	14.4937	40.9838	36.3366	224
chr1	42623464	42623539	ALL_peaks_peak_1919	26	.	3.78672	5.05267	2.67471	38
chr1	42630054	42630153	ALL_peaks_peak_1920	100	.	6.73377	12.8863	10.0305	42
chr1	42631498	42631750	ALL_peaks_peak_1921	127	.	7.61878	15.7635	12.7737	191
chr1	42639130	42639574	ALL_peaks_peak_1922	183	.	7.63736	21.6308	18.354	50
chr1	42639682	42639900	ALL_peaks_peak_1923	111	.	5.82307	14.0188	11.1082	94
chr1	42642528	42642834	ALL_peaks_peak_1924	191	.	7.76983	22.4296	19.1094	244
chr1	42693599	42693676	ALL_peaks_peak_1925	50	.	4.90566	7.62961	5.07202	48
chr1	42712652	42712748	ALL_peaks_peak_1926	59	.	5.3014	8.59228	5.96277	25
chr1	42732070	42732443	ALL_peaks_peak_1927	90	.	6.13141	11.8313	9.02769	327
chr1	42737032	42737163	ALL_peaks_peak_1928	134	.	7.73525	16.4425	13.4176	57
chr1	42767911	42767977	ALL_peaks_peak_1929	68	.	5.68008	9.55656	6.87133	29
chr1	42780069	42780374	ALL_peaks_peak_1930	163	.	8.90187	19.5124	16.3366	219
chr1	42805962	42806093	ALL_peaks_peak_1931	85	.	5.44352	11.3128	8.54082	70
chr1	42809849	42810218	ALL_peaks_peak_1932	292	.	11.5327	33.2601	29.2495	281
chr1	42869828	42869902	ALL_peaks_peak_1933	59	.	5.3014	8.59228	5.96277	40
chr1	42922077	42922215	ALL_peaks_peak_1934	59	.	4.90226	8.56485	5.94817	31
chr1	42923158	42923290	ALL_peaks_peak_1935	85	.	5.84507	11.3173	8.54508	71
chr1	42928644	42928969	ALL_peaks_peak_1936	166	.	8.80282	19.8598	16.6694	183
chr1	42945331	42945542	ALL_peaks_peak_1937	338	.	13.8196	38.3136	33.898	98
chr1	43043665	43044088	ALL_peaks_peak_1938	239	.	9.6074	27.5072	23.9001	60
chr1	43047358	43047496	ALL_peaks_peak_1939	188	.	8.33768	22.1174	18.8117	76
chr1	43112409	43112490	ALL_peaks_peak_1940	68	.	5.68008	9.55656	6.87133	20
chr1	43123691	43124135	ALL_peaks_peak_1941	170	.	8.47612	20.3023	17.0923	294
chr1	43147855	43148054	ALL_peaks_peak_1942	124	.	7.69456	15.4292	12.4534	152
chr1	43156653	43156768	ALL_peaks_peak_1943	26	.	3.78672	5.05267	2.67471	14
chr1	43195857	43195923	ALL_peaks_peak_1944	68	.	5.68008	9.55656	6.87133	31
chr1	43196850	43196986	ALL_peaks_peak_1945	87	.	6.43742	11.5664	8.7735	57
chr1	43201934	43202022	ALL_peaks_peak_1946	78	.	6.05875	10.5485	7.80868	29
chr1	43212975	43213087	ALL_peaks_peak_1947	34	.	4.16539	5.88505	3.43822	24
chr1	43222751	43222946	ALL_peaks_peak_1948	290	.	12.8187	33.0716	29.0811	87
chr1	43224967	43225033	ALL_peaks_peak_1949	38	.	4.26288	6.29754	3.82722	49
chr1	43230002	43230093	ALL_peaks_peak_1950	88	.	5.78838	11.597	8.80288	29
chr1	43231686	43231970	ALL_peaks_peak_1951	227	.	9.85907	26.2789	22.7455	70
chr1	43232683	43232936	ALL_peaks_peak_1952	97	.	6.11283	12.5974	9.76183	61
chr1	43243620	43243811	ALL_peaks_peak_1953	345	.	14.1986	39.0119	34.5324	100
chr1	43312079	43312293	ALL_peaks_peak_1954	188	.	9.77482	22.1306	18.8242	148
chr1	43326424	43326559	ALL_peaks_peak_1955	158	.	8.87968	18.9537	15.8092	86
chr1	43378954	43379303	ALL_peaks_peak_1956	259	.	11.343	29.721	25.9687	239
chr1	43388502	43388941	ALL_peaks_peak_1957	258	.	10.0578	29.6248	25.8784	292
chr1	43389773	43390120	ALL_peaks_peak_1958	77	.	5.2021	10.4784	7.75184	237
chr1	43391209	43391318	ALL_peaks_peak_1959	40	.	3.92855	6.50782	4.02515	54
chr1	43396836	43396959	ALL_peaks_peak_1960	207	.	10.6028	24.1499	20.7324	61
chr1	43409019	43409148	ALL_peaks_peak_1961	127	.	7.84636	15.6902	12.7035	64
chr1	43424499	43424635	ALL_peaks_peak_1962	50	.	4.71889	7.62149	5.06418	63
chr1	43424841	43424945	ALL_peaks_peak_1963	77	.	5.82072	10.5181	7.78961	56
chr1	43432892	43432981	ALL_peaks_peak_1964	50	.	4.92273	7.65747	5.08577	59
chr1	43539380	43540198	ALL_peaks_peak_1965	196	.	8.26205	23.0042	19.6491	179
chr1	43585618	43585734	ALL_peaks_peak_1966	57	.	5.1672	8.37087	5.76408	57
chr1	43609160	43609290	ALL_peaks_peak_1967	161	.	8.49895	19.3094	16.1467	42
chr1	43609385	43609612	ALL_peaks_peak_1968	82	.	5.87122	10.9823	8.22451	44
chr1	43613288	43613459	ALL_peaks_peak_1969	41	.	4.27716	6.58888	4.10122	43
chr1	43630650	43630718	ALL_peaks_peak_1970	50	.	4.92273	7.65747	5.08577	54
chr1	43663188	43663275	ALL_peaks_peak_1971	118	.	7.57344	14.7624	11.8126	41
chr1	43672639	43672716	ALL_peaks_peak_1972	50	.	4.92273	7.65747	5.08577	53
chr1	43690920	43691059	ALL_peaks_peak_1973	61	.	5.01379	8.76192	6.1248	59
chr1	43692860	43693261	ALL_peaks_peak_1974	232	.	10.449	26.8225	23.2522	239
chr1	43703711	43704021	ALL_peaks_peak_1975	290	.	12.8187	33.0716	29.0811	213
chr1	43736170	43736359	ALL_peaks_peak_1976	87	.	6.43742	11.5664	8.7735	134
chr1	43751252	43751489	ALL_peaks_peak_1977	219	.	10.9815	25.3981	21.9106	108
chr1	43782635	43782757	ALL_peaks_peak_1978	42	.	4.54406	6.75426	4.24317	83
chr1	43814652	43814838	ALL_peaks_peak_1979	43	.	4.43111	6.84692	4.33111	25
chr1	43815004	43815284	ALL_peaks_peak_1980	116	.	7.22295	14.6082	11.6734	142
chr1	43823844	43824114	ALL_peaks_peak_1981	169	.	8.69453	20.1875	16.9824	53
chr1	43824408	43824643	ALL_peaks_peak_1982	63	.	5.16329	9.02382	6.37455	87
chr1	43833970	43834168	ALL_peaks_peak_1983	97	.	6.59493	12.6459	9.79921	116
chr1	43834285	43834362	ALL_peaks_peak_1984	22	.	3.47899	4.56548	2.24139	18
chr1	43849288	43849417	ALL_peaks_peak_1985	128	.	7.95211	15.8712	12.8691	33
chr1	43855460	43855549	ALL_peaks_peak_1986	34	.	4.16539	5.88505	3.43822	58
chr1	43880375	43880746	ALL_peaks_peak_1987	328	.	13.5731	37.1615	32.8446	97
chr1	43919602	43919717	ALL_peaks_peak_1988	60	.	4.96247	8.67143	6.03837	62
chr1	43920077	43920497	ALL_peaks_peak_1989	182	.	8.86742	21.5715	18.297	188
chr1	43994728	43995076	ALL_peaks_peak_1990	270	.	11.2908	30.8784	27.0457	245
chr1	44002266	44002359	ALL_peaks_peak_1991	26	.	3.78672	5.05267	2.67471	43
chr1	44015754	44015974	ALL_peaks_peak_1992	58	.	5.04473	8.48863	5.87594	158
chr1	44018559	44018658	ALL_peaks_peak_1993	44	.	4.52268	6.99935	4.47559	27
chr1	44020238	44020357	ALL_peaks_peak_1994	171	.	9.10811	20.4057	17.1908	53
chr1	44056206	44056291	ALL_peaks_peak_1995	128	.	7.95211	15.8712	12.8691	51
chr1	44106063	44106365	ALL_peaks_peak_1996	68	.	5.68008	9.55656	6.87133	88
chr1	44114018	44114094	ALL_peaks_peak_1997	51	.	4.41965	7.69328	5.11975	23
chr1	44115508	44115820	ALL_peaks_peak_1998	145	.	6.90312	17.6346	14.5531	249
chr1	44116053	44116142	ALL_peaks_peak_1999	68	.	4.73844	9.55394	6.87133	56
chr1	44119097	44119325	ALL_peaks_peak_2000	317	.	11.2788	35.9432	31.7223	130
[truncated: 89,616 more rows]

## Sheet: SUB1 CUT&RUN peaks
chr1	10015	10471	ALL_peaks_NT_peak_1	195	.	9.72153	24.2885	19.5217	203
chr1	564540	565354	ALL_peaks_NT_peak_2	397	.	3.08582	44.809	39.7132	401
chr1	565963	566741	ALL_peaks_NT_peak_3	563	.	3.44721	61.6549	56.3746	327
chr1	567275	568180	ALL_peaks_NT_peak_4	657	.	3.67576	71.1878	65.7776	269
chr1	569290	569596	ALL_peaks_NT_peak_5	185	.	2.34977	23.2754	18.5324	94
chr1	569735	570164	ALL_peaks_NT_peak_6	258	.	2.68707	30.7347	25.8538	190
chr1	19923164	19923452	ALL_peaks_NT_peak_7	26	.	4.84121	6.70276	2.62785	192
chr1	28832200	28832609	ALL_peaks_NT_peak_8	77	.	6.80653	12.1822	7.76911	217
chr1	59369315	59369603	ALL_peaks_NT_peak_9	23	.	4.64684	6.39798	2.35442	186
chr1	78444702	78445110	ALL_peaks_NT_peak_10	121	.	8.7108	16.6693	12.1043	200
chr1	91852687	91853290	ALL_peaks_NT_peak_11	1559	.	21.8757	162.115	155.988	284
chr1	101152843	101153294	ALL_peaks_NT_peak_12	136	.	9.68242	18.2745	13.6605	207
chr1	108113167	108113630	ALL_peaks_NT_peak_13	88	.	6.96481	13.2832	8.82693	277
chr1	110881424	110881876	ALL_peaks_NT_peak_14	83	.	6.44662	12.7993	8.36051	203
chr1	111991743	111992258	ALL_peaks_NT_peak_15	55	.	5.87038	9.871	5.56726	333
chr1	115300503	115300827	ALL_peaks_NT_peak_16	82	.	4.67698	12.6858	8.25205	154
chr1	121352142	121352592	ALL_peaks_NT_peak_17	91	.	2.96119	13.5998	9.13092	242
chr1	121357771	121358160	ALL_peaks_NT_peak_18	229	.	3.69649	27.823	22.9919	252
chr1	121478584	121478992	ALL_peaks_NT_peak_19	184	.	3.75139	23.1716	18.4315	323
chr1	121484072	121485534	ALL_peaks_NT_peak_20	2635	.	6.89432	270.587	263.545	1080
chr1	143278625	143279025	ALL_peaks_NT_peak_21	120	.	3.83654	16.6364	12.0729	158
chr1	143282560	143282856	ALL_peaks_NT_peak_22	80	.	3.29562	12.4896	8.0638	173
chr1	143283193	143283926	ALL_peaks_NT_peak_23	113	.	3.75014	15.9413	11.3974	571
chr1	143913286	143913733	ALL_peaks_NT_peak_24	95	.	6.03981	14.0779	9.59334	201
chr1	145516059	145516386	ALL_peaks_NT_peak_25	66	.	5.70091	11.055	6.69248	136
chr1	156186158	156186739	ALL_peaks_NT_peak_26	1451	.	20.3621	151.165	145.134	300
chr1	206137871	206138395	ALL_peaks_NT_peak_27	45	.	4.67387	8.78414	4.5449	394
chr1	231473776	231474064	ALL_peaks_NT_peak_28	68	.	6.48088	11.2481	6.87642	173
chr1	249240086	249240528	ALL_peaks_NT_peak_29	142	.	8.53359	18.8586	14.2286	189
chr10	482630	482918	ALL_peaks_NT_peak_30	28	.	4.35107	6.99244	2.8867	53
chr10	16336813	16337319	ALL_peaks_NT_peak_31	113	.	7.94973	15.8671	11.3252	257
chr10	38881528	38882062	ALL_peaks_NT_peak_32	236	.	8.79987	28.5265	23.6819	267
chr10	39107266	39107561	ALL_peaks_NT_peak_33	141	.	6.2733	18.8165	14.1884	94
chr10	39121326	39121673	ALL_peaks_NT_peak_34	91	.	5.65217	13.6434	9.17334	115
chr10	39128636	39129112	ALL_peaks_NT_peak_35	162	.	7.34532	20.9668	16.2778	223
chr10	39137935	39138421	ALL_peaks_NT_peak_36	237	.	7.99722	28.6218	23.7752	236
chr10	42356159	42356447	ALL_peaks_NT_peak_37	91	.	2.90948	13.6176	9.14828	94
chr10	42356640	42357117	ALL_peaks_NT_peak_38	146	.	3.33653	19.3432	14.6997	189
chr10	42360549	42361005	ALL_peaks_NT_peak_39	307	.	3.88335	35.6788	30.7101	196
chr10	42384396	42384818	ALL_peaks_NT_peak_40	161	.	1.96772	20.8404	16.1551	128
chr10	42384906	42385858	ALL_peaks_NT_peak_41	804	.	3.22887	86.009	80.4133	283
chr10	42386967	42387401	ALL_peaks_NT_peak_42	191	.	1.97576	23.9258	19.167	197
chr10	42395895	42396319	ALL_peaks_NT_peak_43	444	.	2.59269	49.6113	44.4551	185
chr10	42398505	42398994	ALL_peaks_NT_peak_44	386	.	2.74203	43.6867	38.6041	243
chr10	42399222	42399533	ALL_peaks_NT_peak_45	201	.	2.32142	24.8819	20.103	245
chr10	42400023	42400732	ALL_peaks_NT_peak_46	1317	.	5.00388	137.737	131.788	444
chr10	42408038	42408516	ALL_peaks_NT_peak_47	360	.	7.15401	41.1454	36.0967	239
chr10	42409093	42409516	ALL_peaks_NT_peak_48	501	.	8.57058	55.35	50.1317	161
chr10	42527794	42528289	ALL_peaks_NT_peak_49	287	.	2.87261	33.6999	28.7632	251
chr10	42529132	42530265	ALL_peaks_NT_peak_50	1282	.	5.08593	134.211	128.282	267
chr10	42534533	42535023	ALL_peaks_NT_peak_51	220	.	2.41065	26.8962	22.0803	206
chr10	42544486	42545035	ALL_peaks_NT_peak_52	220	.	3.16913	26.8898	22.0741	279
chr10	42545841	42546137	ALL_peaks_NT_peak_53	99	.	2.71127	14.4912	9.99339	224
chr10	42596797	42597393	ALL_peaks_NT_peak_54	1215	.	4.81466	127.472	121.587	286
chr10	42597506	42598727	ALL_peaks_NT_peak_55	468	.	3.17591	52.0352	46.8562	298
chr10	42599305	42600400	ALL_peaks_NT_peak_56	1572	.	5.44541	163.414	157.281	505
chr10	42817852	42818229	ALL_peaks_NT_peak_57	107	.	6.84619	15.2613	10.7378	110
chr10	60028590	60028934	ALL_peaks_NT_peak_58	41	.	5.39151	8.41672	4.19964	104
chr10	75118403	75118826	ALL_peaks_NT_peak_59	37	.	5.29287	7.95234	3.76477	212
chr10	75385540	75386021	ALL_peaks_NT_peak_60	111	.	7.86399	15.7204	11.1834	266
chr10	98561184	98561692	ALL_peaks_NT_peak_61	749	.	19.3274	80.4554	74.9127	248
chr10	99400070	99400485	ALL_peaks_NT_peak_62	65	.	6.26174	10.886	6.53205	202
chr10	101380467	101380768	ALL_peaks_NT_peak_63	57	.	6.00577	10.0936	5.7768	83
chr10	102820544	102820859	ALL_peaks_NT_peak_64	80	.	6.27195	12.485	8.05962	163
chr10	127407837	127408380	ALL_peaks_NT_peak_65	30	.	4.97828	7.17168	3.05006	214
chr10	135500022	135501303	ALL_peaks_NT_peak_66	537	.	8.20358	58.9628	53.7085	824
chr11	5246313	5246784	ALL_peaks_NT_peak_67	97	.	7.25479	14.2169	9.72795	324
chr11	10530554	10531448	ALL_peaks_NT_peak_68	489	.	11.0885	54.1639	48.9596	498
chr11	48817737	48818202	ALL_peaks_NT_peak_69	171	.	7.97255	21.8651	17.1546	227
chr11	48898903	48899303	ALL_peaks_NT_peak_70	96	.	6.08213	14.166	9.67895	197
chr11	50689006	50689294	ALL_peaks_NT_peak_71	85	.	6.30101	12.9476	8.50315	53
chr11	51569682	51570324	ALL_peaks_NT_peak_72	466	.	6.7659	51.811	46.6341	434
chr11	51571917	51572389	ALL_peaks_NT_peak_73	251	.	4.81649	30.0699	25.1998	231
chr11	51579322	51579855	ALL_peaks_NT_peak_74	1114	.	7.04075	117.245	111.419	291
chr11	51580227	51580679	ALL_peaks_NT_peak_75	275	.	3.43135	32.4534	27.5391	189
chr11	51582613	51583109	ALL_peaks_NT_peak_76	390	.	3.57828	44.1664	39.0781	135
chr11	51584708	51585009	ALL_peaks_NT_peak_77	148	.	2.48881	19.467	14.8209	68
chr11	51586718	51587146	ALL_peaks_NT_peak_78	438	.	3.40816	48.9523	43.807	191
chr11	51588738	51589199	ALL_peaks_NT_peak_79	668	.	4.25455	72.3138	66.8876	218
chr11	51590305	51590739	ALL_peaks_NT_peak_80	329	.	3.35808	37.9951	32.9922	106
chr11	51590804	51591401	ALL_peaks_NT_peak_81	847	.	5.10213	90.4392	84.7989	297
chr11	58345926	58346305	ALL_peaks_NT_peak_82	36	.	5.37177	7.794	3.61978	98
chr11	64546098	64546608	ALL_peaks_NT_peak_83	127	.	7.22698	17.3786	12.7929	252
chr11	65382807	65383120	ALL_peaks_NT_peak_84	46	.	5.10986	8.93051	4.68029	212
chr11	67572992	67573477	ALL_peaks_NT_peak_85	40	.	4.88027	8.20644	4.00445	226
chr11	71791569	71791857	ALL_peaks_NT_peak_86	62	.	5.86045	10.5865	6.24646	134
chr11	73882064	73882406	ALL_peaks_NT_peak_87	56	.	5.68505	9.92019	5.61453	170
chr11	77597304	77597755	ALL_peaks_NT_peak_88	84	.	6.96594	12.861	8.41975	258
chr11	85194861	85195375	ALL_peaks_NT_peak_89	594	.	16.7785	64.7411	59.4245	249
chr12	95403	95717	ALL_peaks_NT_peak_90	120	.	7.59494	16.6648	12.0999	88
chr12	2365009	2365319	ALL_peaks_NT_peak_91	67	.	6.8368	11.0806	6.71614	143
chr12	8395761	8396224	ALL_peaks_NT_peak_92	52	.	5.67838	9.55374	5.26799	207
chr12	20704202	20704670	ALL_peaks_NT_peak_93	243	.	11.076	29.2196	24.3631	243
chr12	27090906	27091362	ALL_peaks_NT_peak_94	161	.	9.67492	20.8575	16.1716	256
chr12	29533875	29534291	ALL_peaks_NT_peak_95	63	.	5.91922	10.6875	6.34344	209
chr12	34841537	34842168	ALL_peaks_NT_peak_96	94	.	4.02466	13.9174	9.43817	366
chr12	34846694	34847045	ALL_peaks_NT_peak_97	152	.	4.92126	19.9332	15.2725	240
chr12	50505623	50505911	ALL_peaks_NT_peak_98	65	.	5.80196	10.8599	6.50742	190
chr12	54019883	54020171	ALL_peaks_NT_peak_99	49	.	5.05712	9.17161	4.90688	67
chr12	56709731	56710180	ALL_peaks_NT_peak_100	33	.	4.64191	7.49103	3.34501	225
chr12	64237548	64237836	ALL_peaks_NT_peak_101	38	.	4.60193	8.02631	3.83416	209
chr12	67662669	67663000	ALL_peaks_NT_peak_102	111	.	7.07881	15.7041	11.1676	196
chr12	121124212	121124591	ALL_peaks_NT_peak_103	72	.	5.80046	11.6196	7.23015	187
chr12	127650331	127650981	ALL_peaks_NT_peak_104	330	.	11.3593	38.0519	33.0484	203
chr12	131130783	131131139	ALL_peaks_NT_peak_105	97	.	7.52058	14.224	9.73471	112
chr12	133841491	133841926	ALL_peaks_NT_peak_106	456	.	16.1611	50.8653	45.6967	193
chr13	21750511	21750912	ALL_peaks_NT_peak_107	20	.	3.96922	6.06515	2.05883	61
chr13	28033723	28034278	ALL_peaks_NT_peak_108	199	.	9.3368	24.6779	19.903	278
chr13	110076316	110076872	ALL_peaks_NT_peak_109	1105	.	21.9537	116.327	110.507	268
chr14	19012360	19012856	ALL_peaks_NT_peak_110	230	.	5.40298	27.8592	23.0267	235
chr14	39644146	39644458	ALL_peaks_NT_peak_111	35	.	4.286	7.7341	3.56926	37
chr14	50087233	50087521	ALL_peaks_NT_peak_112	28	.	4.31247	6.92554	2.82497	89
chr14	54976243	54976532	ALL_peaks_NT_peak_113	35	.	4.77881	7.72265	3.55827	222
chr14	69865034	69865322	ALL_peaks_NT_peak_114	32	.	4.55492	7.34287	3.20947	242
chr14	73925238	73925598	ALL_peaks_NT_peak_115	59	.	5.28953	10.2919	5.96618	187
chr14	77923867	77924306	ALL_peaks_NT_peak_116	86	.	6.6313	13.1282	8.67804	235
chr14	78083045	78083425	ALL_peaks_NT_peak_117	85	.	6.82079	13.0363	8.58863	181
chr14	88237483	88237939	ALL_peaks_NT_peak_118	378	.	13.321	42.9575	37.8842	220
chr14	99947390	99947734	ALL_peaks_NT_peak_119	52	.	5.4615	9.53922	5.25512	112
chr14	102414329	102414776	ALL_peaks_NT_peak_120	160	.	8.41067	20.6973	16.0171	266
chr14	103800160	103800468	ALL_peaks_NT_peak_121	78	.	6.16067	12.2831	7.86513	143
chr15	20002206	20002608	ALL_peaks_NT_peak_122	73	.	4.9682	11.731	7.3366	263
chr15	20305931	20306675	ALL_peaks_NT_peak_123	172	.	5.90241	21.9369	17.2243	370
chr15	20546337	20546654	ALL_peaks_NT_peak_124	56	.	4.93486	9.9503	5.64312	176
chr15	21312888	21313862	ALL_peaks_NT_peak_125	105	.	4.71074	15.0988	10.5818	685
chr15	25012403	25012887	ALL_peaks_NT_peak_126	150	.	10.2552	19.7169	15.0621	243
chr15	78730171	78730748	ALL_peaks_NT_peak_127	56	.	5.68505	9.92019	5.61453	334
chr15	94933280	94933573	ALL_peaks_NT_peak_128	106	.	8.36431	15.1734	10.6536	41
chr16	5148152	5148440	ALL_peaks_NT_peak_129	73	.	6.33089	11.7825	7.38465	125
chr16	33237842	33238197	ALL_peaks_NT_peak_130	57	.	3.59906	10.0212	5.70882	172
chr16	33238785	33239399	ALL_peaks_NT_peak_131	65	.	3.7851	10.8916	6.53704	399
chr16	33293809	33294489	ALL_peaks_NT_peak_132	169	.	8.36211	21.6443	16.9396	310
chr16	33866363	33866688	ALL_peaks_NT_peak_133	65	.	4.90782	10.9098	6.55443	94
chr16	33887434	33887942	ALL_peaks_NT_peak_134	251	.	11.1885	30.055	25.1852	256
chr16	33953052	33953469	ALL_peaks_NT_peak_135	234	.	4.18729	28.3297	23.489	142
chr16	33955611	33955936	ALL_peaks_NT_peak_136	111	.	2.93685	15.6457	11.1108	128
chr16	33962966	33964212	ALL_peaks_NT_peak_137	1018	.	7.73543	107.573	101.819	277
chr16	33974193	33974695	ALL_peaks_NT_peak_138	103	.	3.44888	14.8605	10.3509	219
chr16	33975030	33975712	ALL_peaks_NT_peak_139	192	.	4.45726	24.0138	19.2524	438
chr16	34021325	34021794	ALL_peaks_NT_peak_140	194	.	8.82842	24.2007	19.4359	226
chr16	34022415	34022796	ALL_peaks_NT_peak_141	92	.	6.25272	13.6835	9.21166	128
chr16	35239424	35239920	ALL_peaks_NT_peak_142	338	.	10.8826	38.863	33.8475	252
chr16	46386640	46387106	ALL_peaks_NT_peak_143	138	.	2.23946	18.4738	13.8544	190
chr16	46391256	46391716	ALL_peaks_NT_peak_144	232	.	2.08568	28.0978	23.261	200
chr16	46391793	46392303	ALL_peaks_NT_peak_145	298	.	2.24932	34.849	29.8936	273
chr16	46395020	46395450	ALL_peaks_NT_peak_146	144	.	1.87947	19.0778	14.4415	211
chr16	46403541	46403862	ALL_peaks_NT_peak_147	205	.	2.07858	25.3604	20.5724	138
chr16	46404956	46405515	ALL_peaks_NT_peak_148	97	.	1.79807	14.282	9.79069	181
chr16	46406270	46407055	ALL_peaks_NT_peak_149	273	.	2.37896	32.2538	27.3441	528
chr16	46408185	46408495	ALL_peaks_NT_peak_150	87	.	1.83698	13.2156	8.76175	234
chr16	46412817	46413483	ALL_peaks_NT_peak_151	365	.	4.19167	41.5601	36.5061	428
chr16	46420220	46420578	ALL_peaks_NT_peak_152	142	.	2.48339	18.8423	14.2133	208
chr16	46421612	46422024	ALL_peaks_NT_peak_153	136	.	2.4132	18.2718	13.6582	242
chr16	46424616	46425080	ALL_peaks_NT_peak_154	232	.	2.70024	28.1223	23.2849	187
chr16	46428380	46428668	ALL_peaks_NT_peak_155	36	.	1.81905	7.79928	3.62478	175
chr16	46432305	46433421	ALL_peaks_NT_peak_156	536	.	4.39852	58.9307	53.6769	441
chr16	46433771	46434287	ALL_peaks_NT_peak_157	88	.	2.48921	13.2594	8.80397	165
chr16	46435116	46435575	ALL_peaks_NT_peak_158	378	.	4.31303	42.8791	37.807	261
chr16	67867800	67868108	ALL_peaks_NT_peak_159	56	.	5.9373	9.98112	5.67146	53
chr16	75657141	75657533	ALL_peaks_NT_peak_160	62	.	5.86045	10.5865	6.24646	153
chr16	78133232	78133676	ALL_peaks_NT_peak_161	59	.	5.8651	10.2241	5.9013	275
chr16	84047760	84048082	ALL_peaks_NT_peak_162	43	.	5.12015	8.61716	4.38896	80
chr16	88567567	88567967	ALL_peaks_NT_peak_163	97	.	6.77674	14.2492	9.75926	177
chr17	4843284	4843796	ALL_peaks_NT_peak_164	102	.	7.57117	14.7585	10.2515	312
chr17	7760586	7761245	ALL_peaks_NT_peak_165	134	.	7.80125	18.0148	13.4092	442
chr17	22020493	22020984	ALL_peaks_NT_peak_166	955	.	21.7684	101.227	95.5163	236
chr17	22245561	22245929	ALL_peaks_NT_peak_167	110	.	2.50963	15.5561	11.0242	132
chr17	22252958	22253422	ALL_peaks_NT_peak_168	578	.	3.44399	63.1867	57.889	238
chr17	22258286	22258611	ALL_peaks_NT_peak_169	90	.	1.97661	13.4929	9.02807	83
chr17	22259723	22260142	ALL_peaks_NT_peak_170	154	.	2.37655	20.1464	15.4797	175
chr17	22260531	22261704	ALL_peaks_NT_peak_171	442	.	3.5893	49.4367	44.2852	694
chr17	25264882	25265218	ALL_peaks_NT_peak_172	54	.	3.76115	9.77628	5.47781	147
chr17	31149404	31150009	ALL_peaks_NT_peak_173	645	.	16.9352	69.9222	64.5316	337
chr17	33477933	33478438	ALL_peaks_NT_peak_174	341	.	15.0929	39.1895	34.1689	257
chr17	37617476	37617838	ALL_peaks_NT_peak_175	89	.	7.81348	13.424	8.96168	202
chr17	41381725	41382428	ALL_peaks_NT_peak_176	123	.	7.23831	16.9331	12.3592	222
chr17	41399980	41401207	ALL_peaks_NT_peak_177	227	.	7.42731	27.5271	22.7015	1026
chr17	41466045	41466451	ALL_peaks_NT_peak_178	110	.	7.50956	15.5706	11.038	145
chr17	45212889	45213269	ALL_peaks_NT_peak_179	138	.	6.32252	18.5115	13.8907	247
chr17	45213699	45213995	ALL_peaks_NT_peak_180	67	.	4.69925	11.1014	6.73555	43
chr17	45234130	45234618	ALL_peaks_NT_peak_181	282	.	11.8039	33.1477	28.221	242
chr17	45973245	45973608	ALL_peaks_NT_peak_182	57	.	4.97018	10.0208	5.70854	192
chr17	46969655	46970258	ALL_peaks_NT_peak_183	194	.	8.57507	24.2066	19.4413	336
chr17	53045821	53046142	ALL_peaks_NT_peak_184	84	.	5.84112	12.8681	8.42651	217
chr17	55162137	55162553	ALL_peaks_NT_peak_185	55	.	5.08565	9.90473	5.59965	262
chr17	56595227	56595603	ALL_peaks_NT_peak_186	87	.	5.44754	13.1859	8.73293	283
chr17	57183988	57184673	ALL_peaks_NT_peak_187	177	.	4.28571	22.4332	17.71	356
chr17	57232609	57233090	ALL_peaks_NT_peak_188	129	.	5.94073	17.5347	12.9432	239
chr17	57784723	57785186	ALL_peaks_NT_peak_189	65	.	4.76948	10.9355	6.57896	235
chr17	57914790	57915268	ALL_peaks_NT_peak_190	115	.	3.24726	16.0982	11.5499	216
chr17	57970086	57970542	ALL_peaks_NT_peak_191	87	.	3.3469	13.1874	8.7343	263
chr17	58754744	58755357	ALL_peaks_NT_peak_192	290	.	5.84258	33.9693	29.0291	222
chr17	60094773	60095666	ALL_peaks_NT_peak_193	80	.	4.86787	12.5182	8.09164	238
chr17	61699356	61699683	ALL_peaks_NT_peak_194	101	.	6.11132	14.6393	10.1363	153
chr17	61920164	61920489	ALL_peaks_NT_peak_195	51	.	4.86083	9.47013	5.1897	115
chr17	65713890	65714178	ALL_peaks_NT_peak_196	69	.	5.45285	11.3311	6.95569	139
chr17	66031408	66031718	ALL_peaks_NT_peak_197	27	.	3.97614	6.86063	2.76546	140
chr17	72869165	72869483	ALL_peaks_NT_peak_198	54	.	5.80495	9.76312	5.46547	215
chr17	73285498	73285799	ALL_peaks_NT_peak_199	42	.	4.50541	8.45771	4.23871	260
chr18	107795	109540	ALL_peaks_NT_peak_200	1588	.	5.39392	165.01	158.87	490
chr18	110266	110750	ALL_peaks_NT_peak_201	148	.	2.17431	19.4495	14.8039	213
chr18	18517083	18517777	ALL_peaks_NT_peak_202	229	.	2.19128	27.7986	22.968	413
chr18	18518316	18520288	ALL_peaks_NT_peak_203	836	.	3.56838	89.2582	83.6283	989
chr18	50318944	50319243	ALL_peaks_NT_peak_204	89	.	7.81348	13.424	8.96168	227
chr19	7515580	7515947	ALL_peaks_NT_peak_205	67	.	6.8368	11.0806	6.71614	237
chr19	24614215	24614531	ALL_peaks_NT_peak_206	102	.	6.34905	14.7148	10.2091	174
chr19	27731883	27733463	ALL_peaks_NT_peak_207	1384	.	4.69587	144.428	138.429	321
chr19	27733829	27734658	ALL_peaks_NT_peak_208	232	.	2.17887	28.0839	23.2472	581
chr19	27736217	27736683	ALL_peaks_NT_peak_209	266	.	2.2223	31.5809	26.6835	209
chr19	27738255	27738788	ALL_peaks_NT_peak_210	440	.	3.0385	49.185	44.0366	227
chr19	35168491	35168791	ALL_peaks_NT_peak_211	53	.	6.12283	9.59003	5.30196	107
chr19	36066363	36066810	ALL_peaks_NT_peak_212	274	.	12.4104	32.3315	27.4198	235
chr19	36980225	36980724	ALL_peaks_NT_peak_213	46	.	5.86011	8.85605	4.61137	281
chr19	41256500	41257088	ALL_peaks_NT_peak_214	70	.	6.36609	11.4465	7.06458	390
chr19	42363911	42364299	ALL_peaks_NT_peak_215	145	.	8.45914	19.2367	14.596	214
chr19	42772957	42773245	ALL_peaks_NT_peak_216	84	.	7.22298	12.8698	8.42801	150
chr19	43167359	43167979	ALL_peaks_NT_peak_217	934	.	17.7152	99.0967	93.4017	336
chr19	44172597	44172936	ALL_peaks_NT_peak_218	80	.	6.48553	12.4554	8.03072	148
chr19	44915478	44915766	ALL_peaks_NT_peak_219	65	.	6.04036	10.8947	6.54012	187
chr19	45394081	45394467	ALL_peaks_NT_peak_220	88	.	6.76041	13.3563	8.89724	271
chr19	46087804	46088104	ALL_peaks_NT_peak_221	28	.	4.69631	6.99953	2.8927	69
chr19	47104130	47104418	ALL_peaks_NT_peak_222	32	.	4.91803	7.35485	3.22024	185
chr19	48948831	48949271	ALL_peaks_NT_peak_223	47	.	5.54148	8.98569	4.73163	234
chr19	48972203	48972514	ALL_peaks_NT_peak_224	48	.	5.80772	9.08496	4.82516	85
chr19	49999217	49999628	ALL_peaks_NT_peak_225	171	.	9.01293	21.8457	17.1358	182
chr19	55770394	55770682	ALL_peaks_NT_peak_226	36	.	5.22648	7.84668	3.66665	248
chr2	677199	677690	ALL_peaks_NT_peak_227	69	.	5.65867	11.3538	6.97702	221
chr2	740385	740763	ALL_peaks_NT_peak_228	79	.	6.21581	12.3834	7.96087	204
chr2	3184364	3184652	ALL_peaks_NT_peak_229	45	.	5.80945	8.77509	4.53684	84
chr2	18817182	18817471	ALL_peaks_NT_peak_230	99	.	7.4096	14.4827	9.98536	43
chr2	20101457	20101804	ALL_peaks_NT_peak_231	65	.	5.85632	10.956	6.59838	202
chr2	44395287	44395691	ALL_peaks_NT_peak_232	37	.	4.74684	7.97539	3.78558	202
chr2	44636217	44636509	ALL_peaks_NT_peak_233	110	.	7.50956	15.5706	11.038	56
chr2	55844850	55845138	ALL_peaks_NT_peak_234	41	.	5.18672	8.40315	4.18753	119
chr2	70417962	70418253	ALL_peaks_NT_peak_235	53	.	5.74097	9.65739	5.36479	187
chr2	71162227	71162602	ALL_peaks_NT_peak_236	48	.	5.44109	9.1585	4.89446	240
chr2	87623694	87624066	ALL_peaks_NT_peak_237	100	.	5.86957	14.5208	10.0218	172
chr2	88124407	88124701	ALL_peaks_NT_peak_238	109	.	8.27526	15.4794	10.9503	48
chr2	89852991	89853473	ALL_peaks_NT_peak_239	249	.	6.42758	29.7808	24.9151	243
chr2	89868023	89868345	ALL_peaks_NT_peak_240	139	.	3.47857	18.5388	13.9172	254
chr2	89869596	89870052	ALL_peaks_NT_peak_241	155	.	3.51982	20.2429	15.5733	201
chr2	89875059	89875621	ALL_peaks_NT_peak_242	242	.	3.64176	29.056	24.2032	278
chr2	89878342	89878759	ALL_peaks_NT_peak_243	127	.	3.13511	17.3779	12.7922	162
chr2	89878907	89879381	ALL_peaks_NT_peak_244	220	.	3.85932	26.8942	22.0784	216
chr2	90481707	90482502	ALL_peaks_NT_peak_245	57	.	3.86214	10.0766	5.76161	240
chr2	91597050	91597707	ALL_peaks_NT_peak_246	45	.	3.51335	8.78319	4.54471	259
chr2	92269241	92269773	ALL_peaks_NT_peak_247	983	.	13.3424	104.05	98.3174	257
chr2	92275703	92276215	ALL_peaks_NT_peak_248	600	.	8.70607	65.4163	60.0909	243
chr2	92281065	92281582	ALL_peaks_NT_peak_249	446	.	6.8242	49.8472	44.6892	252
chr2	92289964	92291676	ALL_peaks_NT_peak_250	899	.	6.18129	95.5956	89.9226	964
chr2	92296033	92298139	ALL_peaks_NT_peak_251	315	.	3.32255	36.5799	31.5977	289
chr2	92300662	92300960	ALL_peaks_NT_peak_252	149	.	2.64512	19.6336	14.9818	184
chr2	92306737	92307677	ALL_peaks_NT_peak_253	419	.	2.79469	47.0843	41.9614	586
chr2	92307766	92308113	ALL_peaks_NT_peak_254	200	.	2.15906	24.8775	20.0987	273
chr2	92309456	92309800	ALL_peaks_NT_peak_255	138	.	1.88589	18.457	13.8381	155
chr2	92318814	92319336	ALL_peaks_NT_peak_256	222	.	2.05904	27.0845	22.2656	265
chr2	92320056	92320651	ALL_peaks_NT_peak_257	109	.	1.7248	15.4932	10.9636	470
chr2	92324131	92324642	ALL_peaks_NT_peak_258	163	.	2.09583	20.9938	16.3039	254
chr2	92324840	92325571	ALL_peaks_NT_peak_259	521	.	3.12893	57.36	52.1235	242
chr2	109815854	109816316	ALL_peaks_NT_peak_260	297	.	12.971	34.6868	29.733	203
chr2	132997338	132997674	ALL_peaks_NT_peak_261	178	.	6.24291	22.5978	17.8714	163
chr2	133012241	133013167	ALL_peaks_NT_peak_262	385	.	5.70493	43.6464	38.5641	479
chr2	133016755	133017301	ALL_peaks_NT_peak_263	209	.	3.62994	25.7284	20.9337	284
chr2	133018704	133019148	ALL_peaks_NT_peak_264	273	.	4.0325	32.2183	27.3094	233
chr2	133023114	133023440	ALL_peaks_NT_peak_265	143	.	2.819	19.0128	14.3782	227
chr2	133025577	133025897	ALL_peaks_NT_peak_266	137	.	2.60466	18.3815	13.7649	214
chr2	133028354	133028649	ALL_peaks_NT_peak_267	89	.	2.31058	13.3662	8.90633	59
chr2	133029025	133029321	ALL_peaks_NT_peak_268	82	.	2.28797	12.6463	8.21413	233
chr2	133030521	133030827	ALL_peaks_NT_peak_269	73	.	2.21023	11.6998	7.30685	60
chr2	133034484	133034792	ALL_peaks_NT_peak_270	105	.	3.01089	15.0761	10.5597	144
chr2	133038344	133038698	ALL_peaks_NT_peak_271	102	.	4.25311	14.7803	10.2728	86
chr2	162135832	162136122	ALL_peaks_NT_peak_272	39	.	3.47594	8.20118	3.99943	78
chr2	162138228	162138546	ALL_peaks_NT_peak_273	45	.	3.58204	8.74578	4.50912	120
chr2	176032880	176033183	ALL_peaks_NT_peak_274	53	.	5.74097	9.65739	5.36479	64
chr2	190525845	190526171	ALL_peaks_NT_peak_275	65	.	6.5331	10.9538	6.59641	116
chr2	191402490	191402783	ALL_peaks_NT_peak_276	77	.	7.05716	12.192	7.77803	245
chr2	198364682	198364971	ALL_peaks_NT_peak_277	42	.	5.45668	8.5216	4.29958	179
chr2	201676255	201676597	ALL_peaks_NT_peak_278	33	.	5.18086	7.49159	3.34501	108
chr2	215674455	215674831	ALL_peaks_NT_peak_279	44	.	5.35824	8.68569	4.45263	101
chr2	230045333	230045800	ALL_peaks_NT_peak_280	286	.	12.3634	33.5598	28.6264	234
chr2	232328934	232329222	ALL_peaks_NT_peak_281	42	.	5.45668	8.5216	4.29958	177
chr2	233700761	233701264	ALL_peaks_NT_peak_282	164	.	9.53079	21.1513	16.4584	234
chr20	17949419	17949753	ALL_peaks_NT_peak_283	55	.	5.26439	9.8922	5.58765	106
chr20	22308272	22308560	ALL_peaks_NT_peak_284	101	.	7.02606	14.7046	10.1995	238
chr20	25604477	25604927	ALL_peaks_NT_peak_285	40	.	4.92643	8.28593	4.07903	175
chr20	26188670	26189410	ALL_peaks_NT_peak_286	377	.	7.00041	42.8152	37.7438	207
chr20	26189709	26190365	ALL_peaks_NT_peak_287	859	.	11.1836	91.6225	85.9732	307
chr20	26310671	26311005	ALL_peaks_NT_peak_288	115	.	4.82387	16.1395	11.5897	57
chr20	26318003	26318746	ALL_peaks_NT_peak_289	238	.	7.03311	28.7289	23.8803	270
chr20	29518535	29518946	ALL_peaks_NT_peak_290	76	.	6.05327	12.0869	7.6777	223
chr20	29829298	29829795	ALL_peaks_NT_peak_291	303	.	10.1798	35.3141	30.3508	198
chr20	34330099	34330578	ALL_peaks_NT_peak_292	79	.	5.59556	12.3686	7.94693	175
chr20	46523512	46523895	ALL_peaks_NT_peak_293	165	.	5.36385	21.255	16.5599	141
chr20	47131655	47132779	ALL_peaks_NT_peak_294	362	.	6.98472	41.3208	36.2699	719
chr20	49126595	49126926	ALL_peaks_NT_peak_295	79	.	5.26981	12.4162	7.99307	232
chr20	49347414	49347927	ALL_peaks_NT_peak_296	112	.	3.33391	15.7819	11.2429	245
chr20	49378049	49378585	ALL_peaks_NT_peak_297	95	.	3.56893	14.0499	9.56671	248
chr20	62296372	62296866	ALL_peaks_NT_peak_298	76	.	6.05327	12.0869	7.6777	250
chr21	9695851	9696318	ALL_peaks_NT_peak_299	281	.	5.45241	33.078	28.1525	186
chr21	9698824	9699223	ALL_peaks_NT_peak_300	222	.	4.83651	27.1175	22.2978	216
chr21	9699424	9699894	ALL_peaks_NT_peak_301	187	.	4.48711	23.5486	18.798	215
chr21	9825438	9827590	ALL_peaks_NT_peak_302	1241	.	7.41926	130.006	124.104	1831
chr21	10702167	10703091	ALL_peaks_NT_peak_303	91	.	3.43293	13.6203	9.1509	424
chr21	10773050	10773484	ALL_peaks_NT_peak_304	89	.	5.92183	13.4295	8.96693	188
chr21	10819392	10819905	ALL_peaks_NT_peak_305	301	.	8.77307	35.0983	30.1383	227
chr21	11186336	11186875	ALL_peaks_NT_peak_306	107	.	6.01168	15.2449	10.7218	277
chr22	18688312	18688606	ALL_peaks_NT_peak_307	72	.	6.71592	11.6342	7.2444	166
chr22	18717889	18718283	ALL_peaks_NT_peak_308	90	.	7.37705	13.5471	9.08067	175
chr22	18883791	18884252	ALL_peaks_NT_peak_309	123	.	6.76459	16.887	12.3149	272
chr22	20689260	20689548	ALL_peaks_NT_peak_310	75	.	6.88231	11.9065	7.5039	243
chr22	21522074	21522362	ALL_peaks_NT_peak_311	75	.	6.6531	11.9271	7.52315	106
chr3	14220182	14220488	ALL_peaks_NT_peak_312	56	.	5.47963	9.92442	5.61806	115
chr3	15643119	15643476	ALL_peaks_NT_peak_313	37	.	4.92403	7.96646	3.77767	135
chr3	42641840	42642128	ALL_peaks_NT_peak_314	54	.	6.20703	9.72514	5.43004	170
chr3	49131504	49131855	ALL_peaks_NT_peak_315	44	.	5.72956	8.64758	4.41692	257
chr3	75718184	75718725	ALL_peaks_NT_peak_316	309	.	8.50442	35.9441	30.972	315
chr3	81341119	81341629	ALL_peaks_NT_peak_317	419	.	15.0024	47.082	41.9592	250
chr3	93781663	93782147	ALL_peaks_NT_peak_318	132	.	7.98416	17.8636	13.2631	231
chr3	96336090	96336408	ALL_peaks_NT_peak_319	109	.	6.74363	15.5058	10.975	156
chr3	96336560	96336904	ALL_peaks_NT_peak_320	134	.	7.32524	18.0483	13.4416	233
chr3	108308259	108308765	ALL_peaks_NT_peak_321	140	.	6.95691	18.6707	14.0458	268
chr3	119813545	119813880	ALL_peaks_NT_peak_322	30	.	4.47113	7.1994	3.07532	206
chr3	129830712	129831000	ALL_peaks_NT_peak_323	47	.	5.1573	9.01337	4.75764	165
chr3	144517844	144518584	ALL_peaks_NT_peak_324	1087	.	16.6735	114.54	108.733	334
chr3	196625459	196625970	ALL_peaks_NT_peak_325	1066	.	20.2242	112.452	106.66	254
chr3	197895593	197896110	ALL_peaks_NT_peak_326	66	.	5.70091	11.055	6.69248	230
chr4	9154379	9154800	ALL_peaks_NT_peak_327	53	.	6.12283	9.59003	5.30196	174
chr4	49093890	49094236	ALL_peaks_NT_peak_328	112	.	3.49196	15.8011	11.2617	198
chr4	49094568	49095067	ALL_peaks_NT_peak_329	180	.	3.92358	22.791	18.0604	260
chr4	49104520	49104837	ALL_peaks_NT_peak_330	98	.	2.5873	14.3165	9.82413	63
chr4	49110301	49110722	ALL_peaks_NT_peak_331	185	.	3.11721	23.2645	18.5217	186
chr4	49111503	49111988	ALL_peaks_NT_peak_332	241	.	3.61578	29.0456	24.1929	259
chr4	49120730	49121255	ALL_peaks_NT_peak_333	133	.	3.10116	17.9144	13.3122	446
chr4	49122905	49123206	ALL_peaks_NT_peak_334	87	.	2.71589	13.2351	8.7805	76
chr4	49139007	49139483	ALL_peaks_NT_peak_335	294	.	4.70744	34.3753	29.4261	271
chr4	49149316	49149711	ALL_peaks_NT_peak_336	206	.	3.51991	25.4715	20.6811	255
chr4	49151176	49151826	ALL_peaks_NT_peak_337	560	.	5.23123	61.3246	56.0469	285
chr4	49156246	49156819	ALL_peaks_NT_peak_338	291	.	4.4951	34.0496	29.1077	249
chr4	49297716	49298224	ALL_peaks_NT_peak_339	32	.	2.94487	7.36773	3.23275	143
chr4	49309175	49309555	ALL_peaks_NT_peak_340	91	.	4.25796	13.6024	9.13338	205
chr4	49318788	49319097	ALL_peaks_NT_peak_341	165	.	4.3978	21.1992	16.505	159
chr4	49512148	49512472	ALL_peaks_NT_peak_342	124	.	4.08287	16.9948	12.4185	170
chr4	49513012	49513319	ALL_peaks_NT_peak_343	84	.	3.53729	12.9373	8.49302	114
chr4	49515644	49516044	ALL_peaks_NT_peak_344	75	.	3.42662	11.9766	7.57142	148
chr4	49634695	49635009	ALL_peaks_NT_peak_345	119	.	3.07085	16.488	11.9281	260
chr4	49636103	49636637	ALL_peaks_NT_peak_346	176	.	3.29937	22.3271	17.6063	264
chr4	49636994	49637494	ALL_peaks_NT_peak_347	127	.	2.86443	17.3705	12.7851	234
chr4	49652543	49652841	ALL_peaks_NT_peak_348	62	.	2.96328	10.6214	6.28052	220
chr4	49659317	49659872	ALL_peaks_NT_peak_349	433	.	9.24374	48.5347	43.3932	297
chr4	68264405	68265086	ALL_peaks_NT_peak_350	494	.	5.68623	54.6677	49.4581	404
chr4	68265218	68266738	ALL_peaks_NT_peak_351	636	.	6.46324	69.0227	63.6468	551
chr4	76807046	76807486	ALL_peaks_NT_peak_352	183	.	10.6557	23.0898	18.352	199
chr4	80273514	80273994	ALL_peaks_NT_peak_353	177	.	8.77094	22.4598	17.736	223
chr4	103748992	103749453	ALL_peaks_NT_peak_354	88	.	6.76041	13.3563	8.89724	241
chr4	190154884	190155629	ALL_peaks_NT_peak_355	82	.	5.9344	12.657	8.22407	239
chr4	190156056	190156553	ALL_peaks_NT_peak_356	81	.	5.88865	12.5678	8.13949	251
chr4	190943350	190943896	ALL_peaks_NT_peak_357	134	.	6.86562	18.0099	13.405	286
chr4	191043879	191044241	ALL_peaks_NT_peak_358	188	.	10.2639	23.5568	18.8057	137
chr5	10152	11747	ALL_peaks_NT_peak_359	641	.	9.87479	69.4847	64.1012	1327
chr5	26699932	26700444	ALL_peaks_NT_peak_360	429	.	14.4084	48.0947	42.9589	264
chr5	43313671	43313960	ALL_peaks_NT_peak_361	46	.	5.66202	8.85137	4.60902	257
chr5	46359089	46359378	ALL_peaks_NT_peak_362	74	.	5.18493	11.8667	7.46616	242
chr5	49405645	49406076	ALL_peaks_NT_peak_363	293	.	7.68069	34.3247	29.3762	242
chr5	49440638	49441070	ALL_peaks_NT_peak_364	191	.	4.28206	23.917	19.1585	224
chr5	49535025	49535504	ALL_peaks_NT_peak_365	85	.	6.12472	13.0249	8.57784	246
chr5	70882840	70883160	ALL_peaks_NT_peak_366	64	.	5.97918	10.7902	6.44169	214
chr5	71146608	71147107	ALL_peaks_NT_peak_367	658	.	17.5123	71.2641	65.8521	242
chr5	79947053	79947589	ALL_peaks_NT_peak_368	507	.	13.1376	55.9693	50.746	277
chr5	118406437	118406892	ALL_peaks_NT_peak_369	54	.	5.57103	9.72642	5.43093	197
chr5	134259820	134260313	ALL_peaks_NT_peak_370	152	.	6.05289	19.912	15.2516	236
chr5	134262602	134262890	ALL_peaks_NT_peak_371	112	.	5.27688	15.7421	11.204	174
chr5	137878970	137879275	ALL_peaks_NT_peak_372	59	.	5.69095	10.2935	5.96753	217
chr5	148922156	148922446	ALL_peaks_NT_peak_373	122	.	8.23847	16.8415	12.271	24
chr5	176449591	176449888	ALL_peaks_NT_peak_374	78	.	6.16067	12.2831	7.86513	112
chr5	178986487	178986896	ALL_peaks_NT_peak_375	70	.	6.36609	11.4465	7.06458	235
chr5	179125623	179125911	ALL_peaks_NT_peak_376	46	.	5.47902	8.88363	4.63603	68
chr6	28863442	28863745	ALL_peaks_NT_peak_377	44	.	5.35824	8.68569	4.45263	82
chr6	32145844	32146132	ALL_peaks_NT_peak_378	67	.	6.61609	11.0885	6.72362	192
chr6	33168433	33168837	ALL_peaks_NT_peak_379	107	.	7.61753	15.2961	10.7714	183
chr6	35995299	35995705	ALL_peaks_NT_peak_380	171	.	9.95101	21.8823	17.1709	236
chr6	44355089	44355613	ALL_peaks_NT_peak_381	58	.	5.80383	10.121	5.80288	203
chr6	58776263	58779512	ALL_peaks_NT_peak_382	845	.	3.16744	90.2199	84.582	2201
chr6	61911429	61911805	ALL_peaks_NT_peak_383	135	.	4.34323	18.1699	13.5595	268
chr6	61912884	61913674	ALL_peaks_NT_peak_384	250	.	5.76198	29.929	25.0609	571
chr6	61914025	61914445	ALL_peaks_NT_peak_385	260	.	5.89374	30.9415	26.0564	260
chr6	62283843	62284339	ALL_peaks_NT_peak_386	192	.	11.1838	23.9833	19.2223	233
chr6	74229979	74230388	ALL_peaks_NT_peak_387	64	.	5.74859	10.7653	6.4182	146
chr6	75252784	75253288	ALL_peaks_NT_peak_388	204	.	11.2108	25.2005	20.4149	254
chr6	119558396	119558883	ALL_peaks_NT_peak_389	350	.	13.2728	40.0616	35.0283	237
chr6	133593913	133594251	ALL_peaks_NT_peak_390	117	.	8.49762	16.3153	11.7607	165
chr6	151518326	151518614	ALL_peaks_NT_peak_391	96	.	7.17978	14.0875	9.60234	245
chr6	159224359	159224866	ALL_peaks_NT_peak_392	303	.	12.931	35.2876	30.3246	255
chr6	170707736	170708142	ALL_peaks_NT_peak_393	77	.	5.17555	12.2043	7.7899	202
chr6	170708366	170708886	ALL_peaks_NT_peak_394	89	.	5.54797	13.4116	8.94977	221
chr7	24005	24468	ALL_peaks_NT_peak_395	298	.	10.2174	34.7961	29.8414	223
chr7	23271248	23271722	ALL_peaks_NT_peak_396	181	.	10.2211	22.9115	18.1784	234
chr7	35840396	35840725	ALL_peaks_NT_peak_397	58	.	6.07583	10.2084	5.88648	210
chr7	45291391	45291891	ALL_peaks_NT_peak_398	387	.	15.6339	43.8105	38.7261	243
chr7	56440243	56440554	ALL_peaks_NT_peak_399	39	.	3.25112	8.19171	3.99023	271
chr7	61079459	61079862	ALL_peaks_NT_peak_400	109	.	3.81796	15.4874	10.958	239
chr7	61080367	61080884	ALL_peaks_NT_peak_401	320	.	5.88607	37.0652	32.0749	260
chr7	61083487	61083846	ALL_peaks_NT_peak_402	189	.	4.63231	23.6782	18.9242	122
chr7	61794374	61794774	ALL_peaks_NT_peak_403	221	.	8.58811	26.9318	22.1151	196
chr7	61968587	61969821	ALL_peaks_NT_peak_404	2202	.	5.86814	226.701	220.262	476
chr7	61970087	61970593	ALL_peaks_NT_peak_405	782	.	3.55619	83.8389	78.2641	272
chr7	61976232	61976547	ALL_peaks_NT_peak_406	115	.	3.55357	16.1479	11.5975	201
chr7	72649466	72649836	ALL_peaks_NT_peak_407	78	.	6.16067	12.2831	7.86513	174
chr7	84286169	84286467	ALL_peaks_NT_peak_408	142	.	7.7331	18.8652	14.2348	244
chr7	94287264	94287799	ALL_peaks_NT_peak_409	44	.	4.60499	8.65129	4.42019	421
chr7	100026845	100027236	ALL_peaks_NT_peak_410	44	.	4.60499	8.65129	4.42019	200
chr7	100184006	100184294	ALL_peaks_NT_peak_411	44	.	4.77099	8.64884	4.41795	198
chr7	100303518	100303827	ALL_peaks_NT_peak_412	38	.	4.44747	8.043	3.8498	137
chr7	100550766	100551083	ALL_peaks_NT_peak_413	116	.	6.45042	16.2143	11.6623	67
chr7	102004019	102004342	ALL_peaks_NT_peak_414	68	.	5.41237	11.2514	6.87958	130
chr7	108166571	108166888	ALL_peaks_NT_peak_415	33	.	4.16503	7.49958	3.35244	209
chr7	135194673	135195025	ALL_peaks_NT_peak_416	44	.	5.17099	8.70348	4.46919	107
chr8	25315994	25316282	ALL_peaks_NT_peak_417	40	.	5.50257	8.28598	4.07903	166
chr8	34291164	34291654	ALL_peaks_NT_peak_418	205	.	11.6139	25.2933	20.5062	252
chr8	43092740	43093366	ALL_peaks_NT_peak_419	700	.	5.87764	75.5548	70.0776	192
chr8	43094594	43095376	ALL_peaks_NT_peak_420	593	.	5.39453	64.6302	59.3143	386
chr8	43095711	43096179	ALL_peaks_NT_peak_421	352	.	4.23717	40.2777	35.2407	226
chr8	43096605	43097048	ALL_peaks_NT_peak_422	143	.	2.99696	18.957	14.3235	279
chr8	43793368	43794901	ALL_peaks_NT_peak_423	467	.	8.18135	51.9303	46.7525	696
chr8	43822253	43822677	ALL_peaks_NT_peak_424	383	.	4.17362	43.4031	38.3237	194
chr8	43826915	43827301	ALL_peaks_NT_peak_425	140	.	2.49959	18.6458	14.0219	160
chr8	43827875	43828252	ALL_peaks_NT_peak_426	142	.	2.57003	18.8448	14.2157	140
chr8	43835337	43835630	ALL_peaks_NT_peak_427	116	.	2.66933	16.1733	11.6221	223
chr8	43837157	43837722	ALL_peaks_NT_peak_428	163	.	3.27947	21.0673	16.3761	112
chr8	43838450	43838754	ALL_peaks_NT_peak_429	180	.	3.66098	22.7501	18.0201	172
chr8	46841546	46841931	ALL_peaks_NT_peak_430	178	.	2.74687	22.5268	17.8017	227
chr8	46842134	46842582	ALL_peaks_NT_peak_431	197	.	2.79493	24.5105	19.7394	109
chr8	46844076	46844479	ALL_peaks_NT_peak_432	357	.	3.21547	40.8329	35.7886	216
chr8	46849150	46849917	ALL_peaks_NT_peak_433	192	.	2.48814	23.9952	19.2342	174
chr8	46855149	46855603	ALL_peaks_NT_peak_434	91	.	2.39337	13.6429	9.1731	208
chr8	52811691	52812059	ALL_peaks_NT_peak_435	72	.	6.50643	11.6821	7.28967	111
chr8	70602143	70602673	ALL_peaks_NT_peak_436	843	.	18.3651	90.0212	84.3847	245
chr8	82754513	82754972	ALL_peaks_NT_peak_437	277	.	11.2259	32.6455	27.7275	220
chr8	86575819	86576155	ALL_peaks_NT_peak_438	77	.	4.27807	12.1698	7.75721	214
chr8	99085486	99085964	ALL_peaks_NT_peak_439	187	.	8.76541	23.5278	18.7783	238
chr8	103251367	103251858	ALL_peaks_NT_peak_440	55	.	4.7434	9.89011	5.58572	387
chr8	137006216	137006721	ALL_peaks_NT_peak_441	153	.	9.49968	20.0203	15.3564	235
chr8	141474691	141475035	ALL_peaks_NT_peak_442	37	.	5.08766	7.92577	3.74018	127
chr8	144911399	144911703	ALL_peaks_NT_peak_443	69	.	6.08437	11.3557	6.97854	120
chr9	4792783	4793071	ALL_peaks_NT_peak_444	21	.	4.52571	6.20861	2.18427	190
chr9	34329251	34329610	ALL_peaks_NT_peak_445	52	.	5.87643	9.53019	5.2468	172
chr9	42415916	42416204	ALL_peaks_NT_peak_446	96	.	7.7426	14.1517	9.665	140
chr9	42818886	42819378	ALL_peaks_NT_peak_447	424	.	16.0686	47.6234	42.4937	245
chr9	44070478	44070983	ALL_peaks_NT_peak_448	470	.	14.6228	52.2478	47.0658	255
chr9	44992613	44993454	ALL_peaks_NT_peak_449	172	.	8.02842	21.985	17.2716	221
chr9	45729031	45729377	ALL_peaks_NT_peak_450	64	.	5.97918	10.7902	6.44169	153
chr9	66800566	66801051	ALL_peaks_NT_peak_451	389	.	9.65653	44.08	38.9934	223
chr9	66822160	66822477	ALL_peaks_NT_peak_452	84	.	4.04354	12.8607	8.41968	235
chr9	66823368	66823780	ALL_peaks_NT_peak_453	232	.	6.33943	28.1281	23.2904	174
chr9	66833126	66833452	ALL_peaks_NT_peak_454	176	.	4.55768	22.3229	17.6022	211
chr9	66833519	66834381	ALL_peaks_NT_peak_455	669	.	8.94898	72.3514	66.9242	334
chr9	66970886	66971652	ALL_peaks_NT_peak_456	3627	.	15.1566	372.195	362.704	359
chr9	67320319	67321073	ALL_peaks_NT_peak_457	1662	.	15.5821	172.448	166.289	321
chr9	67791106	67791958	ALL_peaks_NT_peak_458	228	.	8.69528	27.7285	22.8994	284
chr9	69710725	69711404	ALL_peaks_NT_peak_459	2217	.	18.4141	228.183	221.735	291
chr9	70076512	70076995	ALL_peaks_NT_peak_460	271	.	13.3668	32.0477	27.1413	230
chr9	70327278	70327700	ALL_peaks_NT_peak_461	110	.	8.59435	15.5508	11.019	190
chr9	72653020	72653412	ALL_peaks_NT_peak_462	441	.	16.563	49.3141	44.1636	250
chr9	79186582	79187060	ALL_peaks_NT_peak_463	378	.	13.9814	42.8757	37.8036	240
chr9	86595185	86595535	ALL_peaks_NT_peak_464	42	.	5.45668	8.5216	4.29958	135
chr9	98637851	98638186	ALL_peaks_NT_peak_465	110	.	7.27848	15.6173	11.0829	112
chr9	123605202	123605566	ALL_peaks_NT_peak_466	103	.	7.87989	14.8241	10.3155	240
chr9	140222599	140222934	ALL_peaks_NT_peak_467	122	.	7.66479	16.7927	12.2232	182
chr9	140739996	140740640	ALL_peaks_NT_peak_468	54	.	5.00844	9.75641	5.45927	454
chr9	141122378	141122674	ALL_peaks_NT_peak_469	51	.	4.53681	9.45171	5.17266	151
chrM	136	3352	ALL_peaks_NT_peak_470	63	.	1.3821	10.6429	6.30141	2780
chrM	13746	16469	ALL_peaks_NT_peak_471	360	.	1.99264	41.0855	36.0378	2355
chrX	20112408	20112887	ALL_peaks_NT_peak_472	124	.	8.60656	16.9788	12.4032	251
chrX	53513348	53513655	ALL_peaks_NT_peak_473	193	.	11.6171	24.135	19.3712	251
chrX	53710903	53711437	ALL_peaks_NT_peak_474	193	.	10.5996	24.1443	19.3804	263
chrX	58578721	58579905	ALL_peaks_NT_peak_475	68	.	2.4834	11.2727	6.8998	165
chrX	61683104	61683533	ALL_peaks_NT_peak_476	96	.	3.54509	14.1759	9.68841	212
chrX	61689816	61690144	ALL_peaks_NT_peak_477	131	.	3.17662	17.6958	13.1001	105
chrX	61691415	61692197	ALL_peaks_NT_peak_478	161	.	3.36129	20.8729	16.1866	277
chrX	61710592	61710880	ALL_peaks_NT_peak_479	73	.	2.59722	11.7115	7.31813	111
chrX	61712437	61712727	ALL_peaks_NT_peak_480	137	.	3.20618	18.3397	13.7239	215
chrX	61719443	61719872	ALL_peaks_NT_peak_481	202	.	3.66675	25.0476	20.2657	312
chrX	61722823	61723117	ALL_peaks_NT_peak_482	79	.	2.91985	12.4111	7.98822	63
chrX	61730850	61731353	ALL_peaks_NT_peak_483	192	.	4.82986	24.008	19.2466	237
chrX	61815125	61815424	ALL_peaks_NT_peak_484	82	.	5.40097	12.7077	8.27259	75
chrX	61839071	61839476	ALL_peaks_NT_peak_485	73	.	5.66465	11.7445	7.34934	213
chrX	61875495	61875783	ALL_peaks_NT_peak_486	99	.	6.42398	14.4401	9.94404	212
chrX	61881258	61881546	ALL_peaks_NT_peak_487	58	.	6.25447	10.141	5.82142	237
chrX	77154758	77155090	ALL_peaks_NT_peak_488	64	.	6.68449	10.8345	6.48385	113
chrX	77359368	77359831	ALL_peaks_NT_peak_489	62	.	6.50558	10.5459	6.2078	243
chrX	108297245	108297931	ALL_peaks_NT_peak_490	1068	.	18.5414	112.604	106.811	421
chrX	114359810	114360287	ALL_peaks_NT_peak_491	242	.	12.4119	29.1074	24.2535	266
chrX	115004642	115005098	ALL_peaks_NT_peak_492	130	.	6.00113	17.6917	13.0961	223
chrX	117479828	117480150	ALL_peaks_NT_peak_493	67	.	6.40615	11.1249	6.75761	146
chrX	136520271	136520717	ALL_peaks_NT_peak_494	296	.	13.2826	34.5773	29.6248	236
chrX	153607140	153607615	ALL_peaks_NT_peak_495	217	.	10.0283	26.6096	21.7989	253
chrX	155259924	155260437	ALL_peaks_NT_peak_496	603	.	17.9426	65.6416	60.3145	270
chrY	10025013	10025392	ALL_peaks_NT_peak_497	185	.	4.17333	23.258	18.5153	210
chrY	10026448	10026891	ALL_peaks_NT_peak_498	152	.	3.98653	19.8801	15.2212	251
chrY	10036025	10036712	ALL_peaks_NT_peak_499	170	.	5.85815	21.7921	17.0838	544
chrY	10037610	10037918	ALL_peaks_NT_peak_500	187	.	6.70367	23.5331	18.7835	228
chrY	10043622	10043910	ALL_peaks_NT_peak_501	63	.	5.6962	10.6722	6.32873	94
chrY	13453111	13453706	ALL_peaks_NT_peak_502	195	.	4.573	24.3372	19.5695	281
chrY	13460756	13461347	ALL_peaks_NT_peak_503	1100	.	8.03859	115.913	110.097	310
chrY	13467749	13468550	ALL_peaks_NT_peak_504	961	.	6.14283	101.899	96.1852	495
chrY	13468910	13469353	ALL_peaks_NT_peak_505	218	.	3.11348	26.627	21.816	211
chrY	13474272	13474750	ALL_peaks_NT_peak_506	208	.	4.40938	25.6067	20.8145	164
chrY	13481882	13482364	ALL_peaks_NT_peak_507	386	.	3.96456	43.6935	38.6107	186
chrY	13485181	13485953	ALL_peaks_NT_peak_508	381	.	4.05936	43.2002	38.1235	451
chrY	13800865	13801312	ALL_peaks_NT_peak_509	165	.	10.1971	21.2007	16.5063	252
chrY	13810855	13811231	ALL_peaks_NT_peak_510	82	.	6.38733	12.693	8.25852	226
chrY	13833079	13833389	ALL_peaks_NT_peak_511	88	.	7.74593	13.3139	8.85654	257
chrY	13842460	13843007	ALL_peaks_NT_peak_512	1166	.	16.0314	122.483	116.63	255
chrY	13843704	13844009	ALL_peaks_NT_peak_513	97	.	4.44968	14.2471	9.75737	245
chrY	13851773	13852108	ALL_peaks_NT_peak_514	197	.	8.01012	24.5141	19.7428	226
chrY	13859792	13860207	ALL_peaks_NT_peak_515	158	.	8.341	20.562	15.8851	159
chrY	13868167	13868674	ALL_peaks_NT_peak_516	313	.	9.01994	36.371	31.3915	260
chrY	58972853	58973143	ALL_peaks_NT_peak_517	90	.	5.42779	13.5166	9.05107	111
chrY	58984918	58985430	ALL_peaks_NT_peak_518	343	.	5.72636	39.3837	34.3598	248
chrY	58993788	58994209	ALL_peaks_NT_peak_519	198	.	4.40447	24.646	19.8718	173
chrY	58996752	58997264	ALL_peaks_NT_peak_520	261	.	5.92375	31.079	26.191	277
chrY	59362927	59363445	ALL_peaks_NT_peak_521	511	.	17.4043	56.4283	51.1998	308
