# Supplementary material for: EPB41L4A-AS1 long noncoding RNA acts in both cis- and trans-acting transcriptional regulation and controls nucleolar biology
Source: bioRxiv preprint, doi:10.1101/2025.04.08.647803, version 3 (2025-11-16)
Supplement: Table S4 [file 647803_file06.xlsx]

## Sheet: EPB41L4A-AS1 KD - SLAMseq kinet
Gene	Symbol	Length	Type	kinetics.NT.Synthesis	kinetics.NT.Half-life	kinetics.NT.logLik	kinetics.NT.lower.Half-life	kinetics.NT.upper.Half-life	kinetics.LNA1.Synthesis	kinetics.LNA1.Half-life	kinetics.LNA1.logLik	kinetics.LNA1.lower.Half-life	kinetics.LNA1.upper.Half-life	kinetics.LNA2.Synthesis	kinetics.LNA2.Half-life	kinetics.LNA2.logLik	kinetics.LNA2.lower.Half-life	kinetics.LNA2.upper.Half-life
LINC01409	Unrelated|ENSG00000237491.10	LINC01409	2949	Unknown	1614.18	0.00365	-66.0056	NA	NA	3.84464	2.0275	-62.2173	1.18599	6.98034	1.7098	3.09887	-61.0562	1.77182	12.3451
LINC01128	Unrelated|ENSG00000228794.12	LINC01128	8389	Unknown	25.9716	3.12859	-106.338	2.34691	4.69102	32.441	3.56331	-113.493	2.61493	5.59105	39.9255	2.06884	-113.497	1.37991	4.13159
SAMD11	Unrelated|ENSG00000187634.13	SAMD11	3468	Unknown	7.49945	6.48019	-101.336	4.5639	11.1704	3.1534	13.0597	-90.8411	7.40766	55.104	8.04502	13.3824	-106.906	6.99281	155.14
KLHL17	Unrelated|ENSG00000187961.15	KLHL17	2567	Unknown	4.71609	6.10904	-79.8567	4.73737	8.59873	4.12213	8.94906	-88.7354	6.25541	15.7169	4.34412	5.06202	-93.3853	3.42365	9.70745
PLEKHN1	Unrelated|ENSG00000187583.11	PLEKHN1	3176	Unknown	2.40833	14.6175	-100.263	9.25029	34.8214	8.37047	5.54637	-110.613	4.00957	8.9934	3.40536	3.81599	-90.8405	3.06368	5.05804
ISG15	Unrelated|ENSG00000187608.10	ISG15	787	Unknown	3.9403	13.9016	-94.2979	10.7931	19.5249	27.7198	15.861	-127.131	10.9926	28.4692	10.1893	8.76505	-109.604	6.36171	14.0868
AGRN	Unrelated|ENSG00000188157.15	AGRN	7394	Unknown	100.416	20.1525	-167.323	17.0527	24.6296	78.9631	12.8564	-162.22	9.55201	19.656	93.8586	14.068	-171.907	10.0672	23.3461
ENSG00000242590	Unrelated|ENSG00000242590.1	ENSG00000242590	402	Unknown	1.62061	24.6271	-86.0335	18.3664	37.3633	2.12034	13.798	-82.9106	8.64428	34.1708	2.57388	12.4121	-93.0521	7.26443	42.5977
ENSG00000217801	Unrelated|ENSG00000217801.12	ENSG00000217801	1219	Unknown	1.49726	4.18452	-60.733	2.59973	10.7185	1.92831	8.5039	-68.818	5.41881	19.7457	0.661261	8.69565	-60.4171	4.56466	91.5261
SCNN1D	Unrelated|ENSG00000162572.21	SCNN1D	3475	Unknown	0.36845	15.5373	-60.7277	9.15805	51.2062	1.01349	6.95379	-67.1346	4.64048	13.8661	0.655444	13.8085	-64.191	7.83543	58.0962
PUSL1	Unrelated|ENSG00000169972.12	PUSL1	1257	Unknown	9.51176	13.6933	-121.435	9.96443	21.8818	13.8469	7.42277	-116.012	5.43348	11.71	12.0537	4.6693	-109.056	3.68603	6.368
CPTP	Unrelated|ENSG00000224051.7	CPTP	2154	Unknown	56.4521	3.36349	-124.783	2.58483	4.81353	52.8379	4.73396	-133.934	3.61371	6.8608	59.4757	2.33854	-126.899	1.66321	3.93723
MRPL20-AS1	Unrelated|ENSG00000224870.9	MRPL20-AS1	1868	Unknown	19.802	3.18884	-99.5021	2.41485	4.69301	21.8387	2.75074	-102.033	1.97742	4.51737	24.0361	2.35202	-106.893	1.65795	4.04569
VWA1	Unrelated|ENSG00000179403.12	VWA1	4492	Unknown	17.1829	12.3114	-128.108	9.47332	17.5773	26.5521	6.17547	-132.552	4.5427	9.64053	20.5619	4.52858	-118.553	3.55038	6.2508
ATAD3C	Unrelated|ENSG00000215915.10	ATAD3C	3864	Unknown	0.766721	11.6456	-65.1264	7.70466	23.8399	0.897086	10.11	-60.7292	6.13493	28.7172	0.793554	14.2759	-67.4275	7.44089	175.324
ATAD3B	Unrelated|ENSG00000160072.20	ATAD3B	4098	Unknown	16.4307	9.42229	-121.995	7.18267	13.6914	17.9858	5.33219	-113.222	4.02927	7.88047	22.0179	3.42141	-109.308	2.63482	4.87752
ATAD3A	Unrelated|ENSG00000197785.14	ATAD3A	2612	Unknown	17.736	16.9911	-142.259	12.0929	28.5591	14.6393	9.20118	-128.391	6.57119	15.3412	15.6245	6.91031	-127.533	5.36754	9.69769
MIB2	Unrelated|ENSG00000197530.13	MIB2	3311	Unknown	5.99934	11.2947	-94.8085	9.1712	14.6978	9.14349	12.1949	-110.132	7.93611	26.3179	6.11286	13.8125	-107.377	7.44784	94.9718
GABRD	Unrelated|ENSG00000187730.9	GABRD	1914	Unknown	1.07553	10.8977	-66.4412	7.73191	18.4533	3.22032	6.92249	-85.5235	4.98983	11.2987	1.73641	6.27484	-80.5481	4.29252	11.6591
PRKCZ	Unrelated|ENSG00000067606.17	PRKCZ	2385	Unknown	32.2517	6.58077	-125.8	5.19641	8.97059	45.2705	9.42278	-140.913	6.16562	19.9753	33.6418	5.10128	-132.457	3.39008	10.3008
SKI	Unrelated|ENSG00000157933.10	SKI	6083	Unknown	311.902	1.93338	-151.144	1.4082	3.08324	279.299	2.84723	-157.424	2.05584	4.62923	304.938	1.82517	-158.467	1.12195	4.89027
RER1	Unrelated|ENSG00000157916.20	RER1	3028	Unknown	45.3061	8.4872	-138.686	6.78243	11.3367	48.166	9.2688	-140.73	6.5252	15.9934	52.8514	7.16597	-146.107	5.05093	12.3284
ENSG00000272449	Unrelated|ENSG00000272449.3	ENSG00000272449	1531	Unknown	0.906893	8.50768	-60.6553	5.72866	16.5232	3.30368	3.7994	-75.6034	2.72179	6.28957	1.20492	4.15383	-63.1124	2.8239	7.85155
PRXL2B	Unrelated|ENSG00000157870.17	PRXL2B	2827	Unknown	10.7285	14.3635	-122.41	10.7804	21.5139	12.8654	9.2913	-118.82	6.65116	15.4071	11.6246	6.62694	-115.442	5.15479	9.2761
PRDM16	Unrelated|ENSG00000142611.17	PRDM16	8698	Unknown	6.77898	4.80294	-101.864	2.92085	13.5051	7.42294	2.49903	-91.2928	1.74769	4.38355	6.04853	2.53587	-85.3928	1.76336	4.51298
ARHGEF16	Unrelated|ENSG00000130762.15	ARHGEF16	2822	Unknown	27.9796	9.01732	-136.606	6.67258	13.9027	35.793	5.77123	-138.635	4.37225	8.48669	27.6915	5.03102	-131.126	3.60537	8.32159
TPRG1L	Unrelated|ENSG00000158109.15	TPRG1L	2401	Unknown	77.1973	3.83457	-127.947	3.15679	4.88297	81.7758	3.91268	-137.627	2.88576	6.07427	90.9522	2.95756	-140.583	2.10235	4.98566
TP73	Host|ENSG00000078900.15	TP73	5192	Unknown	9.23636	4.02575	-102.131	2.54969	9.56052	3.62102	3.96537	-83.1426	3.01472	5.7917	10.9553	2.35017	-92.8858	1.64329	4.12431
TP73.1	OtherIntrons|ENSG00000078900.15	TP73.1	75231	Unknown	10.6393	2.06752	-91.2393	1.14666	10.4995	7.89026	1.46336	-80.782	0.873251	4.51321	17.4118	1.1438	-86.2866	0.641671	5.25976
SMIM1	Unrelated|ENSG00000235169.11	SMIM1	547	Unknown	0.750239	18.2792	-75.7422	11.6434	42.5008	0.458485	10.9966	-71.7059	6.79336	28.8414	0.701003	8.61849	-69.3625	5.07906	28.4313
DFFB	Unrelated|ENSG00000169598.17	DFFB	3105	Unknown	4.90444	5.76869	-98.4862	3.51483	16.0797	6.5795	2.91562	-85.6175	2.03796	5.12098	8.34529	2.1917	-88.9241	1.5436	3.77792
AJAP1	Unrelated|ENSG00000196581.11	AJAP1	12102	Unknown	0.762811	11.1117	-66.5444	7.08029	25.8046	0.976642	6.72107	-67.6552	4.54392	12.9037	0.975568	3.0951	-45.9087	2.25714	4.92263
KCNAB2	Unrelated|ENSG00000069424.16	KCNAB2	4302	Unknown	13.4567	9.6243	-116.801	7.40125	13.7561	9.25217	9.70603	-105.091	6.67766	17.7606	9.03417	5.99097	-107.268	3.98931	12.0242
RNF207	Unrelated|ENSG00000158286.13	RNF207	3981	Unknown	3.26738	5.64341	-81.0968	3.82153	10.7852	7.46383	4.34669	-98.7762	3.04334	7.60265	7.3929	3.9684	-90.7095	2.67096	7.71695
ICMT-DT	Unrelated|ENSG00000225077.3	ICMT-DT	2040	Unknown	0.66231	9.23419	-53.6207	6.33828	17.0025	1.07936	4.96611	-67.0919	3.1969	11.1202	1.04279	5.21615	-55.7439	3.63049	9.261
ESPN	Unrelated|ENSG00000187017.18	ESPN	4731	Unknown	10.0415	18.5728	-116.027	15.1522	23.9881	21.4391	16.1046	-137.617	11.1781	28.7954	7.73856	11.5741	-113.311	8.44818	18.3717
ZBTB48	Unrelated|ENSG00000204859.13	ZBTB48	2347	Unknown	52.7361	1.34883	-99.5796	0.887644	2.8075	33.1001	2.69512	-108.39	1.96291	4.29859	41.3303	1.48885	-108.268	0.874366	5.00929
PHF13	Unrelated|ENSG00000116273.6	PHF13	3632	Unknown	110.144	1.80583	-134.181	1.13711	4.3841	80.7119	1.88209	-125.299	1.32724	3.23411	124.024	1.27457	-129.341	0.784068	3.40424
THAP3	Unrelated|ENSG00000041988.16	THAP3	2053	Unknown	43.7865	1.58336	-91.7863	1.19574	2.34279	32.5724	3.11414	-113.351	2.18837	5.3975	38.4907	1.72367	-105.748	1.10204	3.9541
CAMTA1	Unrelated|ENSG00000171735.20	CAMTA1	8314	Unknown	11.1959	10.9446	-111.796	8.69125	14.7753	13.652	8.02414	-110.445	5.38946	15.6984	16.3226	6.34717	-120.815	4.29203	12.1786
VAMP3	Unrelated|ENSG00000049245.13	VAMP3	2178	Unknown	41.8789	7.23869	-138.808	5.48165	10.6534	4.63322	8.75759	-90.8907	5.99883	16.2143	42.8628	6.2399	-142.006	4.22068	11.9633
PER3	Unrelated|ENSG00000049246.15	PER3	6365	Unknown	17.7967	7.36641	-120.054	5.5005	11.1481	13.8786	6.05094	-112.335	4.31494	10.1241	19.5818	3.80896	-117.301	2.70439	6.43877
PARK7	Unrelated|ENSG00000116288.13	PARK7	1127	Unknown	37.9933	18.6388	-157.113	14.0166	27.8094	37.1115	13.1827	-152.812	8.61285	28.0836	35.3772	12.4595	-157.192	8.54512	22.9915
H6PD	Unrelated|ENSG00000049239.13	H6PD	9147	Unknown	48.0791	5.83524	-131.88	4.63151	7.88441	35.2292	8.77171	-125.818	6.26932	14.5988	53.5665	5.69826	-140.59	3.86908	10.8079
SPSB1	Host|ENSG00000171621.14	SPSB1	3106	Unknown	79.9535	1.12115	-110.769	0.607454	7.26414	104.261	1.04245	-117.424	0.536571	18.2266	58.0763	1.51434	-116.3	0.90699	4.58377
Pre||snoDB1425	Pre||snoDB1425	Pre||snoDB1425	20063	Unknown	2980.53	0.0171124	-104.619	NA	NA	591.933	0.106429	-115.001	NA	NA	391.584	0.135512	-105.532	NA	NA
Post||snoDB1425	Post||snoDB1425	Post||snoDB1425	42357	Unknown	58.2993	1.01716	-110.166	0.412631	Inf	830.195	0.0770915	-114.819	NA	NA	1039.38	0.056982	-110.744	NA	NA
SPSB1.1	OtherIntrons|ENSG00000171621.14	SPSB1.1	10862	Unknown	8.03176	1.98091	-66.4993	1.40678	3.3468	7400.91	0.00214371	-85.1683	NA	NA	16.6022	0.854114	-81.0046	0.251647	-0.612667
SLC25A33	Unrelated|ENSG00000171612.7	SLC25A33	3865	Unknown	25.4364	4.9759	-126.07	3.42283	9.109	25.9792	4.34881	-114.356	3.23777	6.62067	34.3776	2.98301	-122.287	2.10339	5.12716
TMEM201	Unrelated|ENSG00000188807.13	TMEM201	3851	Unknown	76.1269	3.2021	-144.3	2.08444	6.90388	66.6061	3.28623	-132.727	2.59396	4.4825	65.9831	2.25193	-133.954	1.63893	3.59751
PIK3CD	Unrelated|ENSG00000171608.18	PIK3CD	5412	Unknown	1.52026	6.19163	-65.8233	4.1449	12.2315	0.544098	6.6581	-54.4362	3.60706	43.1928	2.285	3.71268	-68.7153	2.50933	7.13359
NMNAT1	Unrelated|ENSG00000173614.14	NMNAT1	3734	Unknown	20.8219	3.80191	-108.126	2.81205	5.8672	20.4639	3.79485	-109.602	2.7213	6.2673	27.6173	2.79175	-112.847	1.91687	5.13575
UBE4B	Host|ENSG00000130939.20	UBE4B	6184	Unknown	51.8522	10.6598	-156.554	7.77856	16.9311	41.438	5.51368	-140.235	4.09215	8.44855	53.11	5.3162	-147.042	3.86248	8.5246
UBE4B.1	OtherIntrons|ENSG00000130939.20	UBE4B.1	140259	Unknown	209.358	1.34096	-143.023	0.740809	7.06226	245.989	1.0663	-146.594	0.508351	-10.9291	247.94	1.11603	-146.703	0.557362	-478.076
KIF1B	Unrelated|ENSG00000054523.20	KIF1B	10855	Unknown	113.839	5.59499	-156.613	4.23534	8.24037	92.2597	4.64482	-151.893	3.23057	8.26147	128.885	3.64225	-158.323	2.58003	6.19123
PGD	Unrelated|ENSG00000142657.21	PGD	2268	Unknown	123.992	12.6069	-172.64	10.0052	17.0373	91.926	9.56033	-164.556	6.84389	15.8524	121.175	8.85411	-173.494	6.35282	14.6042
CENPS-CORT	Unrelated|ENSG00000251503.8	CENPS-CORT	1469	Unknown	3.87227	8.32672	-89.39	6.015	13.5245	3.38819	7.50424	-82.9522	4.87898	16.2457	3.80978	6.62297	-87.4401	4.36779	13.6929
CENPS	Unrelated|ENSG00000175279.22	CENPS	905	Unknown	3.34796	10.4627	-95.7177	7.15227	19.4783	2.68619	10.5512	-87.4125	6.36749	30.7654	4.00611	6.46948	-90.8037	4.36107	12.5247
PEX14	Unrelated|ENSG00000142655.13	PEX14	1922	Unknown	31.5778	4.12245	-114.018	3.24445	5.65196	26.4003	5.79257	-121.05	3.99626	10.5224	29.2534	2.77876	-112.692	1.96101	4.76636
TARDBP	Host|ENSG00000120948.19	TARDBP	4185	Unknown	95.2107	7.13061	-160.362	5.27652	10.9936	73.3555	6.32422	-150.42	4.33586	11.6809	101.263	4.48088	-159.162	3.25366	7.19451
TARDBP.1	OtherIntrons|ENSG00000120948.19	TARDBP.1	8041	Unknown	41.9687	5.78424	-133.737	4.36688	8.56377	32.5274	5.70745	-126.687	3.88597	10.7431	47.8659	3.94165	-135.828	2.82043	6.54258
UBIAD1	Unrelated|ENSG00000120942.14	UBIAD1	3654	Unknown	60.5941	2.31662	-125.184	1.56296	4.47395	30.0667	4.03087	-116.27	2.93966	6.41043	70.8691	1.84731	-127.816	1.21473	3.85465
DISP3	Unrelated|ENSG00000204624.8	DISP3	5265	Unknown	3.58673	2.82434	-78.0604	1.52457	19.1542	16.2153	2.7576	-99.5965	1.56421	11.6325	6.66205	3.15299	-78.0331	2.00799	7.33641
FBXO44	Unrelated|ENSG00000132879.14	FBXO44	3320	Unknown	7.34418	8.50235	-99.1981	6.54712	12.1227	15.3058	7.39278	-116.254	5.28033	12.3225	7.79917	6.73509	-103.057	4.61394	12.4661
FBXO6	Unrelated|ENSG00000116663.11	FBXO6	1444	Unknown	3.14663	8.28423	-85.7159	5.88428	13.9903	15.2615	9.7007	-120.143	6.45432	19.5176	6.03759	7.83551	-100.435	5.32035	14.8609
AGTRAP	Unrelated|ENSG00000177674.16	AGTRAP	1130	Unknown	8.65629	14.5121	-116.003	11.0542	21.1182	7.56428	9.66901	-108.832	7.26816	14.4384	7.57721	8.63072	-108.811	6.68292	12.181
CLCN6	Unrelated|ENSG00000011021.23	CLCN6	5631	Unknown	28.5849	2.70576	-103.229	2.04314	4.00445	36.7828	2.72202	-111.32	1.88935	4.86702	41.0381	1.97492	-110.943	1.31714	3.94511
ENSG00000285646	Unrelated|ENSG00000285646.2	ENSG00000285646	1715	Unknown	11.8961	9.71905	-138.494	5.30759	57.5645	11.8798	69.3147	-157.626	10.742	-15.5669	13.1072	17.2523	-144.241	6.49282	-26.2539
PLOD1	Unrelated|ENSG00000083444.17	PLOD1	2976	Unknown	39.5101	13.8546	-146.489	11.0533	18.5578	57.18	10.5055	-157.654	7.11695	20.0538	44.2033	9.11827	-151.013	6.20115	17.2178
MFN2	Unrelated|ENSG00000116688.18	MFN2	4772	Unknown	99.6672	8.94007	-159.954	7.07721	12.134	115.408	7.49464	-164.011	5.52208	11.6596	118.417	5.38199	-161.828	3.92419	8.5631
MIIP	Unrelated|ENSG00000116691.11	MIIP	1541	Unknown	14.2515	7.80291	-111.098	6.11835	10.7675	15.9237	7.48885	-112.998	5.76048	10.699	16.36	4.22415	-111.562	3.19833	6.21874
VPS13D	Host|ENSG00000048707.15	VPS13D	16357	Unknown	100.976	6.83561	-158.715	5.16756	10.0938	60.3743	7.43683	-148.659	4.86244	15.8044	95.5474	5.10591	-158.031	3.35191	10.7106
VPS13D.1	OtherIntrons|ENSG00000048707.15	VPS13D.1	252824	Unknown	252.153	1.5331	-154.475	0.843256	8.42698	258.497	1.13557	-149.064	0.567789	47477.9	351.601	1.05626	-154.846	0.481211	-5.41656
Post|SNORA59A|snoDB0003	Post|SNORA59A|snoDB0003	Post|SNORA59A|snoDB0003	1495	Unknown	2.22478	4.35175	-67.8559	2.84664	9.23411	1.12494	3.80064	-58.2306	2.53061	7.62976	1.77535	4.76686	-70.3201	2.81374	15.585
PRDM2	Unrelated|ENSG00000116731.23	PRDM2	7957	Unknown	156.898	3.80263	-155.385	2.84927	5.71478	140.486	5.4193	-164.577	3.71911	9.9831	164.482	3.01845	-155.775	2.03664	5.82798
KAZN	Unrelated|ENSG00000189337.17	KAZN	6874	Unknown	20.5318	4.31593	-112.702	3.13979	6.90098	22.0028	3.57642	-116.567	2.47139	6.46879	21.5916	2.26169	-106.075	1.60825	3.80949
TMEM51	Host|ENSG00000171729.14	TMEM51	1971	Unknown	30.3549	2.71333	-111.722	1.89305	4.78804	30.579	2.68448	-115.167	1.93913	4.36056	39.0355	1.63046	-105.924	1.1719	2.67857
Pre||snoDB1200	Pre||snoDB1200	Pre||snoDB1200	35574	Unknown	53.7218	1.89836	-124.11	1.10063	6.89798	120.527	1.00898	-134.231	0.484829	-12.4399	91.0266	0.989646	-128.407	0.504277	26.3936
Post||snoDB1200	Post||snoDB1200	Post||snoDB1200	20909	Unknown	3714.51	0.00964132	-105.595	NA	NA	53.4276	0.874816	-117.206	0.335739	-1.44444	33.45	1.03301	-107.852	0.50205	-17.9409
TMEM51.1	OtherIntrons|ENSG00000171729.14	TMEM51.1	8230	Unknown	4.87106	2.96536	-81.6356	1.76362	9.30755	12.7596	1.27347	-82.6799	0.758494	3.96657	12.0758	1.0733	-83.4567	0.491021	-5.77523
EFHD2	Unrelated|ENSG00000142634.13	EFHD2	2422	Unknown	26.3957	10.7946	-130.246	8.70331	14.2088	46.7634	7.03122	-136.191	5.23712	10.6951	28.8917	5.58286	-128.626	4.29769	7.96459
DNAJC16	Host|ENSG00000116138.13	DNAJC16	6034	Unknown	54.9917	2.92188	-122.55	2.18272	4.41802	43.5966	3.09696	-123.455	2.18424	5.32003	52.9699	2.22982	-124.831	1.42087	5.17758
DNAJC16.1	OtherIntrons|ENSG00000116138.13	DNAJC16.1	33286	Unknown	58.2687	2.11596	-120.396	1.4341	4.03397	47.8516	2.04374	-119.825	1.33716	4.33378	57.2879	1.64329	-119.786	0.987586	4.89001
Pre||snoDB1590	Pre||snoDB1590	Pre||snoDB1590	4090	Unknown	6.46684	1.18279	-59.7799	0.56509	Inf	6.42918	0.979156	-60.8644	0.419251	-2.9186	4.53131	1.45636	-68.7251	0.669833	-8.35985
Pre|SCARNA21B|snoDB0005	Pre|SCARNA21B|snoDB0005	Pre|SCARNA21B|snoDB0005	5350	Unknown	3.98934	1.72176	-63.9756	0.882457	35.2128	2.55142	2.13107	-59.0265	1.30008	5.90621	1431.48	0.00521891	-64.5047	NA	NA
DDI2	Unrelated|ENSG00000197312.12	DDI2	10667	Unknown	206.638	2.37878	-149.098	1.73947	3.76111	160.867	3.03638	-156.076	2.09243	5.53202	208.414	2.09101	-154.556	1.35979	4.52352
PLEKHM2	Unrelated|ENSG00000116786.13	PLEKHM2	4134	Unknown	57.1506	8.50311	-135.191	7.25566	10.2686	80.9846	8.36355	-152.898	5.98664	13.8707	70.5101	6.03187	-146.19	4.40432	9.56735
FBLIM1	Unrelated|ENSG00000162458.13	FBLIM1	3498	Unknown	3.43346	10.3043	-97.8607	6.86635	20.6372	9.80564	5.70702	-112.57	4.2453	8.70392	5.11378	3.32907	-94.9555	2.54012	4.82889
SPEN	Host|ENSG00000065526.12	SPEN	12385	Unknown	593.717	2.08527	-169.939	1.51456	3.34617	372.058	3.3915	-176.833	2.39477	5.80944	639.611	1.78078	-175.883	1.16798	3.74635
SPEN.1	OtherIntrons|ENSG00000065526.12	SPEN.1	78746	Unknown	108.093	1.54747	-137.153	0.810128	17.2237	135.413	1.33033	-141.252	0.765896	5.05744	201.472	0.760101	-138.234	0.255158	-0.776451
SZRD1	Unrelated|ENSG00000055070.17	SZRD1	3480	Unknown	155.412	6.61104	-158.033	5.45998	8.37706	156.642	6.46571	-160.939	4.84437	9.71829	180.267	5.06196	-167.721	3.65437	8.23326
NECAP2	Unrelated|ENSG00000157191.20	NECAP2	2018	Unknown	30.2547	4.84396	-112.64	3.95683	6.24386	23.2601	4.31446	-112.997	3.27533	6.31931	41.1355	3.67549	-126.088	2.69942	5.7572
LINC01772	Unrelated|ENSG00000226029.1	LINC01772	3245	Unknown	4.67899	1.23327	-62.5623	0.486594	Inf	39.8523	0.117884	-58.3146	2.82039e-07	-2.82041e-07	7.00391	1.1495	-64.1872	0.463831	-2.40347
CROCC	Unrelated|ENSG00000058453.17	CROCC	6660	Unknown	7.31471	8.38483	-102.528	6.21427	12.8856	11.5249	6.78695	-108.347	4.86597	11.214	10.2442	5.26783	-99.4759	3.79895	8.58865
ARHGEF10L	Unrelated|ENSG00000074964.17	ARHGEF10L	4625	Unknown	24.5361	5.23464	-122.895	3.76267	8.5983	24.5984	4.29418	-120.523	2.90265	8.24854	20.1332	2.62269	-106.827	1.89633	4.25095
MRTO4	Unrelated|ENSG00000053372.5	MRTO4	2049	Unknown	46.4233	8.49626	-155.34	5.70036	16.675	50.7151	5.30785	-140.449	4.06118	7.65892	50.0195	4.02824	-146.353	3.01615	6.06256
SLC66A1	Unrelated|ENSG00000040487.13	SLC66A1	2175	Unknown	14.6968	3.93063	-93.6297	3.11375	5.32858	28.3513	5.52151	-115.476	4.07098	8.5779	22.7827	2.29955	-102.852	1.62184	3.9502
MICOS10	Unrelated|ENSG00000173436.15	MICOS10	3723	Unknown	9.71689	15.1285	-115.756	11.9406	20.6386	8.92571	11.3848	-113.161	8.0744	19.2958	10.1583	10.3739	-115.851	7.39212	17.3875
NBL1	Unrelated|ENSG00000158747.15	NBL1	2160	Unknown	9.80374	19.7035	-120.076	15.593	26.7569	18.425	9.19223	-133.711	6.69997	14.6369	9.86031	8.08371	-117.276	6.21397	11.5629
MICOS10-NBL1	Unrelated|ENSG00000270136.6	MICOS10-NBL1	999	Unknown	5.13268	17.7693	-105.274	13.7682	25.0484	5.75676	10.4053	-108.14	7.43863	17.3082	5.67079	9.96986	-99.6874	7.48101	14.9404
OTUD3	Unrelated|ENSG00000169914.6	OTUD3	6515	Unknown	48.0777	1.65638	-116.85	0.936446	7.16399	47.69	1.71483	-113.607	1.06487	4.40122	35.8118	1.37057	-106.751	0.718169	14.9663
PINK1	Unrelated|ENSG00000158828.8	PINK1	2657	Unknown	32.9331	6.27933	-142.501	4.05515	13.9072	24.9253	17.5448	-131.454	10.1495	64.6538	23.9823	19.0534	-135.538	9.04763	-179.921
NBPF3	Unrelated|ENSG00000142794.19	NBPF3	3767	Unknown	16.1486	5.64077	-105.019	4.47147	7.63818	20.4896	8.62947	-122.38	5.78494	16.9776	19.0661	4.08384	-109.617	2.88289	6.99981
ENSG00000285959	Unrelated|ENSG00000285959.1	ENSG00000285959	1469	Unknown	2.28637	3.50668	-70.0164	2.03732	12.579	1.95641	3.14151	-67.0334	1.63277	41.355	3.82056	2.23014	-69.9689	1.31755	7.25587
LINC00339	Unrelated|ENSG00000218510.9	LINC00339	1404	Unknown	14.0902	2.80894	-88.1068	2.10838	4.20675	11.9585	2.61042	-89.3834	1.80229	4.73233	22.918	1.68644	-98.0144	1.05122	4.26158
ENSG00000289694	Unrelated|ENSG00000289694.1	ENSG00000289694	2384	Unknown	101.239	11.6103	-174.392	8.48323	18.3888	72.2728	7.9	-156.083	5.38408	14.8298	103.678	7.55409	-173.746	5.05375	14.9511
CDC42	Unrelated|ENSG00000070831.18	CDC42	10503	Unknown	120.447	10.7247	-175.18	7.97644	16.3621	99.5279	6.63664	-159.376	4.63459	11.6838	132.976	6.86477	-176.107	4.64427	13.1538
ZBTB40	Unrelated|ENSG00000184677.18	ZBTB40	8992	Unknown	149.551	2.79046	-142.474	2.13919	4.01186	105.52	3.58064	-145.564	2.55081	6.00506	150.405	2.41292	-149.374	1.66908	4.35275
EPHB2	Unrelated|ENSG00000133216.17	EPHB2	11035	Unknown	7.40854	12.9894	-112.489	9.65051	19.8609	5.13202	9.26421	-97.6527	6.30339	17.4704	3.60937	8.55689	-94.0202	5.6867	17.2768
KDM1A	Unrelated|ENSG00000004487.18	KDM1A	3984	Unknown	64.8552	11.58	-163.046	8.51789	18.0792	38.7006	8.91533	-147.364	6.12619	16.3669	58.8673	7.00518	-159.351	4.97668	11.8251
RPL11	Unrelated|ENSG00000142676.14	RPL11	1017	Unknown	67.7538	27.0491	-178.415	19.7997	42.6738	64.6421	21.4357	-180.662	12.735	67.6663	56.5625	17.0312	-176.911	11.8762	30.0935
ELOA	Unrelated|ENSG00000011007.13	ELOA	4838	Unknown	163.396	3.98701	-150.353	3.19789	5.29315	136.329	5.22451	-157.576	3.61425	9.4226	205.777	2.81979	-158.305	1.98353	4.87517
PITHD1	Unrelated|ENSG00000057757.10	PITHD1	1590	Unknown	59.2079	3.34805	-128.692	2.49859	5.07263	43.1545	4.51827	-126.876	3.22161	7.56178	60.4995	3.05926	-135.033	2.05765	5.96083
LYPLA2	Unrelated|ENSG00000011009.11	LYPLA2	1635	Unknown	27.759	10.8446	-129.977	8.85298	13.9923	36.7842	7.85673	-132.953	5.85925	11.9206	32.1855	6.38253	-129.141	5.05846	8.64552
PNRC2	Unrelated|ENSG00000189266.13	PNRC2	2428	Unknown	141.784	2.22341	-140.267	1.57415	3.7842	90.3272	3.75791	-141.927	2.4436	8.13147	180.091	1.61788	-143.284	0.983536	4.55688
GRHL3	Unrelated|ENSG00000158055.17	GRHL3	2834	Unknown	43.3386	1.27934	-96.575	0.785735	3.44099	103.366	1.43065	-130.423	0.981518	2.63755	57.9808	1.33093	-117.337	0.90443	2.51865
NIPAL3	Unrelated|ENSG00000001461.17	NIPAL3	5481	Unknown	25.8546	4.95258	-124.285	3.49627	8.48822	16.9308	9.04887	-117.109	5.96305	18.7538	16.4605	10.4804	-123.511	5.7629	57.7733
RCAN3	Unrelated|ENSG00000117602.13	RCAN3	6863	Unknown	22.7652	5.05904	-122.616	3.53381	8.90064	16.1391	8.32078	-119.854	5.37075	18.461	30.9227	3.85382	-123.62	2.48111	8.62655
SRRM1	Unrelated|ENSG00000133226.18	SRRM1	3735	Unknown	143.737	6.5534	-171.232	4.6858	10.8963	131.394	4.72018	-161.855	3.45371	7.45332	160.117	3.59623	-166.689	2.5708	5.98252
CLIC4	Unrelated|ENSG00000169504.15	CLIC4	4253	Unknown	51.3702	8.09806	-150.658	5.85751	13.1145	33.1651	8.43536	-139.958	5.53432	17.7284	51.8756	7.61533	-151.994	4.84068	17.8427
TMEM50A	Unrelated|ENSG00000183726.11	TMEM50A	2266	Unknown	27.3756	8.63553	-134.584	6.42224	13.1766	22.7229	11.4178	-136.092	7.24503	26.9252	27.2697	9.45875	-139.209	5.75623	26.5115
MACO1	Unrelated|ENSG00000204178.11	MACO1	3940	Unknown	33.2212	5.71028	-131.905	4.12316	9.28393	26.961	11.328	-135.864	6.4262	47.755	36.1614	5.37699	-134.579	3.46239	12.0282
LDLRAP1	Unrelated|ENSG00000157978.12	LDLRAP1	2914	Unknown	43.3375	4.92379	-120.213	4.066	6.24029	32.6702	6.79117	-133.25	4.8398	11.3792	42.0065	4.72083	-130.427	3.44755	7.48537
MAN1C1	Unrelated|ENSG00000117643.15	MAN1C1	4647	Unknown	4.26551	6.01296	-80.1822	4.52197	8.97082	3.44292	8.29469	-78.8105	5.32134	18.7985	5.76316	2.91513	-82.2742	1.87382	6.56142
SELENON	Unrelated|ENSG00000162430.18	SELENON	4314	Unknown	32.6343	19.8281	-147.782	15.8594	26.4461	41.442	13.4245	-157.147	9.18191	24.9552	28.0865	14.5929	-151.846	10.1569	25.908
MTFR1L	Unrelated|ENSG00000117640.18	MTFR1L	3262	Unknown	22.7555	6.18128	-111.701	5.05214	7.96043	23.9462	7.14037	-116.944	5.0947	11.931	25.3488	5.99715	-126.515	3.93139	12.6376
PDIK1L	Unrelated|ENSG00000175087.10	PDIK1L	4279	Unknown	56.5494	1.48452	-110.089	0.92072	3.82953	28.768	1.83584	-104.919	1.18178	4.11122	59.4612	1.21282	-112.812	0.641583	11.061
ZNF593	Unrelated|ENSG00000142684.9	ZNF593	698	Unknown	14.4942	8.0432	-119.148	5.88266	12.712	27.4812	5.23881	-122.753	4.0944	7.27114	20.9493	3.47087	-115.998	2.66552	4.97358
CNKSR1	Unrelated|ENSG00000142675.18	CNKSR1	2673	Unknown	18.1856	5.25741	-104.478	4.22651	6.95343	18.64	8.53833	-114.909	5.98639	14.8826	21.0407	5.41334	-118.301	3.67395	10.2806
CEP85	Host|ENSG00000130695.16	CEP85	3935	Unknown	238	1.12454	-137.185	0.608761	7.36236	61.5441	2.58833	-123.81	1.8094	4.54486	185.707	1.18912	-137.808	0.619729	14.6385
CEP85.1	OtherIntrons|ENSG00000130695.16	CEP85.1	29823	Unknown	77.3933	0.965083	-114.762	0.378455	Inf	39.7034	1.27846	-107.737	0.646237	58.9722	567.818	0.114884	-115.205	NA	NA
Post|U3|snoDB2022	Post|U3|snoDB2022	Post|U3|snoDB2022	8323	Unknown	1050.41	0.0126477	-81.8263	NA	NA	73.3886	0.12908	-67.4396	NA	NA	9.20377	1.07081	-76.5296	0.481911	-4.82316
SH3BGRL3	Unrelated|ENSG00000142669.15	SH3BGRL3	768	Unknown	25.1554	20.3003	-145.131	15.7789	28.4536	45.3585	16.1056	-156.076	10.8028	31.6345	25.5948	12.7379	-147.241	9.14705	20.97
DHDDS	Host|ENSG00000117682.18	DHDDS	3288	Unknown	42.3175	5.58033	-130.485	4.32073	7.87654	37.058	6.60361	-129.358	4.83894	10.3941	39.0816	4.59977	-130.966	3.38103	7.19238
DHDDS.1	OtherIntrons|ENSG00000117682.18	DHDDS.1	25685	Unknown	72.4827	0.907588	-109.523	0.349145	Inf	69.1172	1.27349	-119.311	0.639795	133.637	82.1397	0.826144	-115.374	0.292319	-0.999965
Pre||snoDB1341	Pre||snoDB1341	Pre||snoDB1341	7820	Unknown	16.2619	1.52146	-81.0599	0.948216	3.84746	220.953	0.139774	-98.6965	NA	NA	14.0222	1.586	-92.043	0.921275	5.69544
HMGN2	Unrelated|ENSG00000198830.11	HMGN2	1940	Unknown	156.795	14.6901	-181.781	11.6119	19.9892	79.7359	14.8579	-164.874	9.77424	30.9611	153.071	11.6591	-185.536	7.97849	21.644
RPS6KA1	Unrelated|ENSG00000117676.14	RPS6KA1	3192	Unknown	47.774	9.19351	-142.69	7.29529	12.427	69.6646	6.70983	-158.541	4.87193	10.7744	56.3507	4.88411	-143.36	3.57676	7.69774
ARID1A	Unrelated|ENSG00000117713.21	ARID1A	8595	Unknown	685.636	2.05252	-172.384	1.49715	3.26292	143.951	4.27834	-152.725	2.96345	7.69071	621.885	1.55469	-171.885	0.986499	3.66639
PIGV	Unrelated|ENSG00000060642.12	PIGV	4972	Unknown	18.4829	5.17995	-102.704	4.22403	6.69507	17.2789	4.0644	-103.735	3.05114	6.08527	24.1488	4.08594	-117.626	2.82516	7.37892
ZDHHC18	Unrelated|ENSG00000204160.12	ZDHHC18	5045	Unknown	54.0313	5.18568	-132.156	4.10321	7.04394	51.3453	4.78736	-132.874	3.53737	7.40352	71.7394	2.97286	-136.63	2.17559	4.69248
NUDC	Unrelated|ENSG00000090273.14	NUDC	1792	Unknown	42.5011	11.0566	-150.367	8.26652	16.6896	63.0735	9.33013	-155.434	6.53341	16.3133	45.6978	6.83575	-149.303	4.98863	10.855
TRNP1	Unrelated|ENSG00000253368.4	TRNP1	1961	Unknown	2.37058	10.6132	-81.4057	7.83097	16.4617	4.52172	9.93384	-92.8681	6.65575	19.5748	2.50213	6.62755	-76.5274	4.49844	12.5831
WDTC1	Unrelated|ENSG00000142784.16	WDTC1	4706	Unknown	54.9102	11.2568	-151.617	8.85894	15.4343	46.9027	11.306	-148.664	7.61648	21.9281	33.4526	11.6982	-144.841	6.999	35.601
TMEM222	Unrelated|ENSG00000186501.15	TMEM222	1613	Unknown	48.7842	6.62018	-135.999	5.22181	9.04141	64.0567	6.31357	-138.392	4.90956	8.84224	44.3423	4.65297	-135.374	3.31709	7.79031
SYTL1	Unrelated|ENSG00000142765.18	SYTL1	2229	Unknown	9.71945	14.534	-107.709	12.1424	18.0989	10.2338	12.3845	-118.131	8.36295	23.8564	7.71903	12.3816	-114.065	8.13566	25.8974
GPR3	Unrelated|ENSG00000181773.7	GPR3	2137	Unknown	0.901477	1.77129	-40.7457	0.703513	Inf	7.66209	1.75975	-77.1764	1.14656	3.78283	1.99495	2.28929	-63.6176	1.30532	9.29928
FAM76A	Unrelated|ENSG00000009780.16	FAM76A	3579	Unknown	25.0528	3.08948	-104.804	2.32409	4.60657	23.4645	2.79975	-108.539	1.96119	4.89107	28.5984	2.60207	-115.291	1.75293	5.04681
STX12	Unrelated|ENSG00000117758.14	STX12	3034	Unknown	52.1448	4.18735	-130.453	3.17359	6.15277	68.709	4.74831	-144.14	3.36737	8.04927	57.6551	3.73616	-135.184	2.5535	6.95949
PPP1R8	Host|ENSG00000117751.18	PPP1R8	2651	Unknown	133.854	2.15764	-135.397	1.56973	3.44963	110.388	2.90832	-144.212	2.07464	4.86214	147.652	1.79426	-140.609	1.23139	3.30497
PPP1R8.1	OtherIntrons|ENSG00000117751.18	PPP1R8.1	12673	Unknown	61.8623	1.01257	-103.308	0.49379	Inf	69.2205	0.948506	-111.536	0.413474	-3.22629	56.6985	1.06384	-107.229	0.559071	10.9519
Pre|SCARNA1|snoDB0052	Pre|SCARNA1|snoDB0052	Pre|SCARNA1|snoDB0052	1584	Unknown	3.09054	2.1623	-58.5144	1.30526	6.29691	8.85927	1.08616	-71.1893	0.507996	-7.86366	7.52851	1.57608	-78.4639	0.837835	13.2591
SCARNA1	snoDB0052	SCARNA1	166	Unknown	0.121748	65.9349	-62.385	29.3082	Inf	0.47956	69.3147	-82.503	18.642	-40.3415	0.3292	69.3147	-67.9294	18.3017	-38.7809
Post|SCARNA1|snoDB0052	Post|SCARNA1|snoDB0052	Post|SCARNA1|snoDB0052	4132	Unknown	16.297	1.21716	-84.8328	0.565939	Inf	50.1201	0.647969	-98.544	0.153287	-0.290938	19.6867	1.1355	-90.6861	0.531516	-8.32788
THEMIS2	Unrelated|ENSG00000130775.16	THEMIS2	2713	Unknown	2.63018	3.05845	-67.3931	1.83271	9.23498	5.79965	4.37033	-93.1114	2.97445	8.2349	7.5082	2.24535	-77.6895	1.41897	5.37662
SMPDL3B	Unrelated|ENSG00000130768.15	SMPDL3B	1866	Unknown	7.20308	22.206	-125.545	15.6367	38.2941	3.19735	16.3151	-102.102	10.8771	32.6264	4.61549	9.81792	-112.516	7.29883	14.9923
XKR8	Unrelated|ENSG00000158156.9	XKR8	2243	Unknown	31.6176	2.2973	-96.7522	1.7858	3.21941	29.8125	5.12737	-115.656	3.60617	8.86832	38.9864	1.99222	-109.94	1.35908	3.72979
ATP5IF1	Unrelated|ENSG00000130770.18	ATP5IF1	1855	Unknown	34.0594	9.979	-143.301	7.41565	15.2507	35.7556	10.6194	-142.381	6.89608	23.0818	40.1771	8.1188	-144.96	5.43445	16.0435
SESN2	Unrelated|ENSG00000130766.5	SESN2	3462	Unknown	513.739	0.745698	-135.227	0.326674	Inf	578.809	1.34603	-165.237	0.803449	4.14564	638.014	0.70684	-152.275	0.197419	-0.447252
MED18	Unrelated|ENSG00000130772.14	MED18	1829	Unknown	108.449	1.54948	-121.711	1.05025	2.95329	99.075	2.0911	-131.632	1.43067	3.88411	121.965	1.4117	-130.054	0.855555	4.03391
PHACTR4	Unrelated|ENSG00000204138.13	PHACTR4	6048	Unknown	205.795	2.7699	-150.05	2.12004	3.99429	198.748	3.73596	-158.437	2.68397	6.14421	230.294	2.28354	-156.444	1.5457	4.36914
RCC1	Host|ENSG00000180198.17	RCC1	2844	Unknown	182	7.18909	-171.548	5.57049	10.1336	173.942	7.85303	-169.128	5.67476	12.7454	189.498	4.8472	-172.604	3.63059	7.2901
SNHG3	Host|ENSG00000242125.3	SNHG3	2201	Unknown	162.779	2.06795	-154.464	1.19459	7.69033	115.861	2.06177	-137.78	1.30866	4.85673	176.717	1.6134	-153.23	0.959779	5.05795
Pre|SNORA73A|snoDB0069	Pre|SNORA73A|snoDB0069	Pre|SNORA73A|snoDB0069	1281	Unknown	68.6383	2.64333	-138.472	1.64534	6.71851	30.3653	6.88983	-129.142	4.60963	13.634	66.7253	2.6049	-139.644	1.75082	5.0859
SNORA73A	snoDB0069	SNORA73A	206	Unknown	58.0888	69.3147	-187.293	47.0574	131.523	71.3236	69.3147	-214.965	22.4453	-63.699	58.1845	63.8379	-193.125	35.2289	339.728
Post|SNORA73A|snoDB0069	Post|SNORA73A|snoDB0069	Post|SNORA73A|snoDB0069	556	Unknown	60.3627	1.16222	-112.084	0.558372	Inf	34.2494	1.49018	-95.4299	0.956168	3.37522	45.4968	1.16646	-112.948	0.590679	46.2439
snoDB2112	snoDB2112	snoDB2112	207	Unknown	1.43364	13.6892	-91.0562	8.05077	45.6847	0.855463	28.6238	-83.5194	11.4398	-57.006	1.95319	9.7389	-90.5843	5.37993	51.3191
Post||snoDB2112	Post||snoDB2112	Post||snoDB2112	169	Unknown	1.6787	12.2131	-83.126	8.28596	23.2166	1.97003	25.9889	-87.4536	10.4586	-53.5928	2.84597	8.85567	-94.419	5.38172	24.9813
SNORA73B	snoDB0070	SNORA73B	204	Unknown	38.7802	69.3147	-179.562	45.8013	142.441	47.1998	69.3147	-206.296	22.5872	-64.8555	39.2246	53.4504	-186.485	30.0204	243.473
RCC1.1	OtherIntrons|ENSG00000180198.17	RCC1.1	14698	Unknown	421.078	1.08687	-161.928	0.440961	Inf	371.091	0.995353	-150.22	0.41716	-2.57849	334.053	1.1983	-160.919	0.620197	17.654
Post|snoU13|snoDB1883	Post|snoU13|snoDB1883	Post|snoU13|snoDB1883	12282	Unknown	2420.16	0.0369702	-120.356	NA	NA	1032.46	0.132182	-129.065	NA	NA	628.127	0.136223	-121.508	NA	NA
TRNAU1AP	Host|ENSG00000180098.9	TRNAU1AP	1799	Unknown	11.0047	8.25926	-107.474	6.40443	11.6265	10.4194	8.93836	-115.089	5.75273	20.0303	12.5122	5.47336	-108.271	3.8113	9.70609
TRNAU1AP.1	OtherIntrons|ENSG00000180098.9	TRNAU1AP.1	20358	Unknown	61.332	1.29882	-107.092	0.780198	3.8739	51.7194	1.40759	-111.435	0.843849	4.24048	92.05	0.875344	-115.828	0.338667	-1.49716
GMEB1	Host|ENSG00000162419.13	GMEB1	6358	Unknown	137.733	1.29656	-133.762	0.681449	13.319	77.0215	2.23022	-134.912	1.39707	5.52531	116.827	1.44822	-133.485	0.802076	7.44904
GMEB1.1	OtherIntrons|ENSG00000162419.13	GMEB1.1	37852	Unknown	9900.8	0.00505817	-104.963	NA	NA	480.627	0.134605	-114.287	NA	NA	363.052	0.131524	-107.381	NA	NA
YTHDF2	Unrelated|ENSG00000198492.16	YTHDF2	2825	Unknown	493.943	1.52475	-161.269	0.977283	3.4669	232.057	2.48365	-156.931	1.72364	4.4425	567.105	1.28416	-164.935	0.76038	4.12709
EPB41	Unrelated|ENSG00000159023.22	EPB41	6031	Unknown	33.876	10.6509	-145.566	7.83751	16.6149	14.0912	8.02069	-120.592	5.28274	16.6502	31.29	6.61317	-141.966	4.51115	12.3833
PTPRU	Unrelated|ENSG00000060656.20	PTPRU	5573	Unknown	72.8698	9.66771	-147.502	8.06671	12.0616	44.7688	7.55997	-146.26	5.55997	11.8072	66.8621	8.10156	-156.651	5.49452	15.4163
MATN1-AS1	Unrelated|ENSG00000186056.11	MATN1-AS1	3925	Unknown	12.5963	2	-85.6545	1.27491	4.63758	29.396	1.491	-105.131	0.858867	5.64783	20.8301	1.05563	-92.0563	0.546883	15.1393
ZCCHC17	Unrelated|ENSG00000121766.16	ZCCHC17	1730	Unknown	23.8356	7.2854	-124.316	5.57884	10.4962	17.5126	9.8748	-118.427	6.30351	22.7821	25.3919	5.65856	-128.827	3.83031	10.8259
SERINC2	Unrelated|ENSG00000168528.12	SERINC2	2146	Unknown	26.5894	20.3958	-146.663	15.8332	28.6522	25.0448	13.0993	-144.029	9.07444	23.5403	21.1725	12.0993	-139.988	8.55919	20.6332
KHDRBS1	Host|ENSG00000121774.18	KHDRBS1	2713	Unknown	129.162	10.5812	-173.142	8.14635	15.0921	120.018	8.96948	-171.165	6.08927	17.0198	122.329	8.31212	-175.789	5.61915	15.9618
Pre||snoDB1433	Pre||snoDB1433	Pre||snoDB1433	3818	Unknown	10.7342	2.05489	-90.7417	1.14928	9.69232	21.6809	1.1566	-91.3082	0.611613	10.6181	18.1823	1.30968	-91.3834	0.746288	5.34399
Post||snoDB1433	Post||snoDB1433	Post||snoDB1433	11851	Unknown	99.9803	0.572516	-107.979	0.0762691	Inf	522.974	0.123113	-115.544	NA	NA	368.55	0.157982	-115.223	1.10884e-06	-1.10886e-06
KHDRBS1.1	OtherIntrons|ENSG00000121774.18	KHDRBS1.1	11494	Unknown	52.7108	1.39459	-108.981	0.812944	4.9015	94.1376	0.753957	-115.058	0.23264	-0.607604	75.5865	0.954599	-114.169	0.436173	-5.0621
TMEM39B	Unrelated|ENSG00000121775.18	TMEM39B	1778	Unknown	34.345	3.07015	-112.341	2.30562	4.59327	17.6866	4.61709	-107.36	3.29898	7.6894	28.0231	3.65295	-121.111	2.52153	6.62614
KPNA6	Host|ENSG00000025800.14	KPNA6	7355	Unknown	235.985	6.35932	-171.998	5.05375	8.57439	137.581	7.13973	-163.1	4.89147	13.2126	268.048	4.78432	-178.588	3.38049	8.18217
Pre||snoDB1554	Pre||snoDB1554	Pre||snoDB1554	13874	Unknown	42.3631	1.27425	-107.487	0.630439	Inf	65.2329	0.835144	-107.686	0.320223	-1.37357	52.0377	0.92515	-109.595	0.42151	-4.74804
Post||snoDB1554	Post||snoDB1554	Post||snoDB1554	32328	Unknown	49.3615	1.71256	-117.233	0.999147	5.98844	87.333	0.910038	-116.882	0.375474	-2.14782	83.4529	0.867561	-118.074	0.357023	-2.01763
KPNA6.1	OtherIntrons|ENSG00000025800.14	KPNA6.1	14700	Unknown	473.472	0.0790547	-101.695	NA	NA	25.8662	1.21763	-87.8089	0.720692	3.92197	35.8604	1.00031	-95.1722	0.452776	-4.77963
ENSG00000250135	Unrelated|ENSG00000250135.1	ENSG00000250135	667	Unknown	16.5267	6.62936	-107.984	5.32196	8.78831	9.86559	8.50525	-104.414	5.53976	18.303	17.4517	5.01346	-116.384	3.46439	9.06824
TXLNA	Unrelated|ENSG00000084652.16	TXLNA	5012	Unknown	257.433	3.3631	-159	2.63793	4.63813	165.722	3.36798	-153.912	2.52082	5.07279	283.918	2.3296	-163.725	1.5848	4.39517
IQCC	Unrelated|ENSG00000160051.12	IQCC	2252	Unknown	23.357	1.71957	-96.4749	1.05456	4.65514	18.9955	1.9144	-92.987	1.2315	4.29742	57.3989	0.916626	-104.9	0.392061	-2.71216
EIF3I	Unrelated|ENSG00000084623.12	EIF3I	2660	Unknown	113.954	17.3729	-181.09	13.2312	25.2889	123.968	12.0582	-178.414	8.26611	22.2782	92.7158	10.9302	-176.126	7.84062	18.0379
HDAC1	Unrelated|ENSG00000116478.12	HDAC1	2118	Unknown	87.1202	14.7998	-173.542	11.0737	22.305	84.0059	9.19337	-166.568	6.49913	15.7032	76.6666	9.70911	-169.478	6.76379	17.1981
ENSG00000254553	Unrelated|ENSG00000254553.1	ENSG00000254553	3447	Unknown	16.8752	3.68906	-105.857	2.61758	6.24567	20.4898	3.50659	-106.774	2.47716	6	27.3297	2.12072	-109.49	1.43989	4.02288
ZBTB8A	Unrelated|ENSG00000160062.15	ZBTB8A	7077	Unknown	27.9895	3.50278	-114.292	2.5507	5.58892	37.1908	3.38108	-121.325	2.30549	6.33795	50.4366	1.89948	-120.727	1.27037	3.76297
RBBP4	Unrelated|ENSG00000162521.19	RBBP4	7883	Unknown	94.4792	13.0169	-177.394	9.26657	21.8666	59.9314	6.42913	-149.248	4.51099	11.1853	108.053	6.57438	-173.018	4.69606	10.9569
KIAA1522	Unrelated|ENSG00000162522.11	KIAA1522	5493	Unknown	325.356	8.18212	-190.111	6.24896	11.8471	270.089	6.57664	-189.574	4.714	10.8728	332.823	4.23841	-185.512	3.07804	6.80309
S100PBP	Unrelated|ENSG00000116497.18	S100PBP	4220	Unknown	69.1629	2.46337	-129.337	1.69093	4.53508	37.2902	2.92336	-121.893	2.02823	5.23275	97.694	1.72627	-130.977	1.14503	3.50591
ZNF362	Unrelated|ENSG00000160094.15	ZNF362	3187	Unknown	44.8369	4.84358	-124.918	3.86759	6.47841	26.0607	5.54944	-119.343	3.96536	9.24104	60.9347	3.30568	-133.625	2.37282	5.44721
ZSCAN20	Unrelated|ENSG00000121903.15	ZSCAN20	9456	Unknown	43.0814	2.1656	-106.349	1.61043	3.30494	59.4614	1.49196	-117.375	0.863423	5.48444	64.98	1.43416	-117.539	0.820956	5.66717
ZMYM1	Unrelated|ENSG00000197056.11	ZMYM1	4608	Unknown	46.7816	2.73583	-127.155	1.78974	5.80383	36.2208	2.40464	-118.625	1.5731	5.10103	56.6855	2.19402	-130.351	1.35854	5.69853
ZMYM4	Host|ENSG00000146463.12	ZMYM4	7366	Unknown	52.0535	9.15765	-151.429	6.80851	13.9818	29.6422	8.75926	-137.195	5.61645	19.8882	67.7709	4.76662	-153.191	3.32049	8.44427
Pre|SNORA62|snoDB0074	Pre|SNORA62|snoDB0074	Pre|SNORA62|snoDB0074	41188	Unknown	55.7755	1.76331	-121.104	1.03522	5.94352	60.2391	1.20307	-114.432	0.623483	17.0893	112.96	0.903011	-127.187	0.364404	-1.88894
Post|SNORA62|snoDB0074	Post|SNORA62|snoDB0074	Post|SNORA62|snoDB0074	14934	Unknown	11.6138	1.4536	-78.9367	0.785521	9.72269	8.34578	1.51828	-84.1444	0.706963	-10.2859	21.1284	0.866864	-87.1819	0.337782	-1.53065
ZMYM4.1	OtherIntrons|ENSG00000146463.12	ZMYM4.1	89710	Unknown	137.263	1.51038	-139.139	0.831271	8.25136	95.8696	1.41724	-130.705	0.754571	11.637	195.008	1.03497	-140.804	0.487327	-8.36174
NCDN	Unrelated|ENSG00000020129.16	NCDN	3698	Unknown	91.6593	7.58243	-158.899	5.73186	11.1977	75.5889	5.73209	-143.935	4.39825	8.2271	107.694	4.19163	-153.852	3.20576	6.05316
AGO4	Unrelated|ENSG00000134698.11	AGO4	7272	Unknown	13.0141	6.07355	-120.499	3.85868	14.257	7.16683	25.2954	-107.725	10.2485	-54.0262	12.8997	11.6277	-125.791	5.86657	647.024
AGO1	Unrelated|ENSG00000092847.14	AGO1	13712	Unknown	90.121	12.316	-165.116	9.72135	16.7998	69.4498	10.1085	-156.195	6.77709	19.8818	80.1936	9.04464	-164.64	6.07116	17.7267
AGO3	Unrelated|ENSG00000126070.20	AGO3	19660	Unknown	66.3266	4.08283	-136.437	3.06649	6.10685	63.3069	4.62183	-142.603	3.0737	9.31199	96.4455	2.87307	-144.099	1.97349	5.27971
ADPRS	Unrelated|ENSG00000116863.11	ADPRS	1651	Unknown	181.121	1.25122	-129.037	0.776251	3.22377	87.8541	2.16486	-127.531	1.5423	3.6302	141.95	1.60889	-135.755	1.01997	3.80705
MAP7D1	Unrelated|ENSG00000116871.16	MAP7D1	3456	Unknown	147.705	5.42783	-156.881	4.31453	7.31547	217.766	6.42249	-170.074	4.65149	10.3712	189.37	3.44826	-159.274	2.59431	5.14026
THRAP3	Unrelated|ENSG00000054118.15	THRAP3	4405	Unknown	208.22	6.65505	-170.104	5.28826	8.97461	144.653	6.86003	-166.838	4.75913	12.2818	227.11	5.33954	-176.959	3.67073	9.79059
SH3D21	Unrelated|ENSG00000214193.11	SH3D21	5952	Unknown	26.7731	4.61924	-119.594	3.40684	7.17133	30.6931	5.85702	-127.797	3.75196	13.3434	29.0118	7.20517	-130.78	4.42123	19.4565
ENSG00000286379	Unrelated|ENSG00000286379.1	ENSG00000286379	4878	Unknown	2.82073	2.20103	-70.5408	1.02195	Inf	24.9907	0.531017	-75.3195	0.0323551	-0.0368451	3.24078	4.4486	-73.4104	2.29895	68.5007
ZC3H12A	Unrelated|ENSG00000163874.11	ZC3H12A	2654	Unknown	1399.06	0.111394	-126.105	NA	NA	1707.15	0.12668	-134.34	NA	NA	1842.72	0.0796612	-130.086	NA	NA
DNALI1	Unrelated|ENSG00000163879.11	DNALI1	2648	Unknown	7.29419	11.6314	-110	8.62128	17.8711	7.7382	8.71457	-106.598	5.92559	16.4633	8.5891	8.18744	-108.298	5.60123	15.2104
CDCA8	Unrelated|ENSG00000134690.11	CDCA8	2371	Unknown	285.763	2.05473	-153.36	1.46543	3.43676	70.416	3.06763	-131	2.29579	4.62132	235.316	2.05061	-155.995	1.35439	4.21979
MANEAL	Host|ENSG00000185090.15	MANEAL	2640	Unknown	16.4864	6.60356	-110.916	5.16165	9.16332	34.3159	6.78901	-137.217	4.76272	11.8162	19.4085	3.3714	-114.817	2.56623	4.91284
C1orf122	Unrelated|ENSG00000197982.14	C1orf122	2229	Unknown	22.1524	11.101	-120.364	9.36962	13.6174	32.9185	11.4261	-133.755	8.43964	17.6837	20.8625	10.5883	-127.731	7.77748	16.5806
UTP11	Unrelated|ENSG00000183520.12	UTP11	2023	Unknown	35.5273	3.95038	-123.824	2.86321	6.36852	34.1959	4.461	-125.893	3.0722	8.14126	38.5611	3.29638	-131.325	2.24102	6.23051
RRAGC-DT	Unrelated|ENSG00000228436.4	RRAGC-DT	1172	Unknown	0.896093	4.81998	-60.0225	2.60572	32.0839	1.97392	7.48818	-68.6418	4.28198	29.8057	2.82754	2.85593	-65.2619	1.58416	14.4824
AKIRIN1	Unrelated|ENSG00000174574.16	AKIRIN1	2688	Unknown	175.589	2.24403	-145.409	1.5954	3.78139	60.3333	3.47368	-133.045	2.32484	6.86713	208.304	1.79295	-149.985	1.16969	3.83799
NDUFS5	Unrelated|ENSG00000168653.11	NDUFS5	544	Unknown	29.1896	16.4235	-149.9	12.1955	25.1389	34.5283	15.827	-149.036	9.71795	42.6181	29.8856	12.3437	-148.782	8.26504	24.3699
MACF1	Unrelated|ENSG00000127603.32	MACF1	24340	Unknown	243.215	8.58149	-193.916	5.86794	15.9636	289.461	4.41666	-182.763	3.14616	7.40835	221.067	3.39655	-173.783	2.47868	5.39398
BMP8A	Unrelated|ENSG00000183682.8	BMP8A	5636	Unknown	3.21707	7.75635	-81.4134	5.7193	12.0472	10.7908	9.87447	-109.841	6.48056	20.7318	3.95656	6.33564	-83.6999	4.21536	12.7475
PPIE	Unrelated|ENSG00000084072.17	PPIE	4339	Unknown	27.7836	9.27406	-125.683	7.6117	11.8654	27.4973	7.77943	-126.641	5.63147	12.5763	29.1495	6.61579	-132.295	4.80935	10.5956
MFSD2A	Unrelated|ENSG00000168389.18	MFSD2A	2173	Unknown	3.3139	1.57336	-62.079	0.696712	Inf	7.00762	4.14836	-88.6053	2.86675	7.50241	3.67563	1.79199	-70.9146	0.980609	10.3838
CAP1	Unrelated|ENSG00000131236.18	CAP1	3105	Unknown	168.108	11.8175	-182.592	9.03863	17.0635	249.439	8.86132	-192.199	6.01314	16.8358	169.316	8.61929	-183.046	5.96845	15.5063
RLF	Host|ENSG00000117000.9	RLF	6232	Unknown	162.473	1.73563	-140.346	1.11657	3.89532	120.712	2.44513	-146.326	1.55554	5.71134	183.614	1.53331	-145.631	0.904746	5.02299
Pre||snoDB1272	Pre||snoDB1272	Pre||snoDB1272	11001	Unknown	35.0776	1.15609	-101.538	0.522143	Inf	70.2085	0.731142	-108.452	0.216995	-0.533917	399.414	0.113573	-105.877	NA	NA
Post||snoDB1272	Post||snoDB1272	Post||snoDB1272	16303	Unknown	46.285	0.900486	-102.694	0.307037	Inf	310.849	0.156833	-113.09	7.31193e-07	-7.312e-07	63.8753	0.699937	-109.041	0.172284	-0.339332
RLF.1	OtherIntrons|ENSG00000117000.9	RLF.1	45885	Unknown	6098.1	0.0205451	-127.168	NA	NA	125.934	1.04823	-131.506	0.480011	-5.70425	153.187	0.878778	-132.987	0.324588	-1.24233
ZMPSTE24	Unrelated|ENSG00000084073.10	ZMPSTE24	2975	Unknown	29.6322	13.9337	-154.486	9.48284	26.2582	24.5744	6.89923	-146.512	4.72485	12.7811	29.1076	6.5573	-146.222	4.50158	12.0686
SMAP2	Unrelated|ENSG00000084070.12	SMAP2	2905	Unknown	72.1467	5.33664	-142.279	4.12889	7.54308	66.5097	5.33092	-139.178	3.88279	8.50173	77.4172	3.53627	-140.506	2.60751	5.49269
ZFP69B	Unrelated|ENSG00000187801.15	ZFP69B	2217	Unknown	12.5252	1.69647	-92.4192	0.840264	Inf	17.1436	3.11747	-101.697	2.07556	6.25983	9.34068	2.05993	-84.0934	1.24548	5.95239
ZFP69	Unrelated|ENSG00000187815.10	ZFP69	2796	Unknown	8.61243	3.65812	-90.4459	2.56491	6.37548	12.259	5.69865	-114.044	3.75323	11.8311	10.1644	2.54371	-92.7596	1.64275	5.63317
EXO5	Unrelated|ENSG00000164002.12	EXO5	2567	Unknown	41.5272	2.21289	-105.761	1.65519	3.33738	55.434	2.59454	-118.176	1.89471	4.11414	31.8018	2.36225	-108.565	1.62549	4.32059
ZNF684	Unrelated|ENSG00000117010.17	ZNF684	2102	Unknown	5949.65	0.00272809	-85.8304	NA	NA	8.03	5.55431	-93.9682	3.52769	13.0533	12.2786	1.51124	-84.4771	0.769069	43.2083
NFYC	Unrelated|ENSG00000066136.21	NFYC	2363	Unknown	89.9684	3.93506	-143.657	2.92758	5.99982	82.6805	4.51233	-141.383	3.28259	7.21539	82.3684	3.28791	-141.991	2.29262	5.81039
KCNQ4	Unrelated|ENSG00000117013.17	KCNQ4	4324	Unknown	1.66156	12.4149	-99.4789	6.42251	185.373	4.35009	4.08385	-97.8796	3.08313	6.04636	2.79671	1.6298	-84.5032	1.10924	3.07096
CTPS1	Unrelated|ENSG00000171793.17	CTPS1	4790	Unknown	71.1174	9.0068	-168.669	5.90034	19.0213	68.2242	5.22428	-156.253	3.75607	8.57686	80.3518	3.82249	-157.958	2.77564	6.13719
SLFNL1-AS1	Unrelated|ENSG00000281207.1	SLFNL1-AS1	4800	Unknown	5207.15	0.0046701	-90.6761	NA	NA	276.237	0.133269	-104.693	NA	NA	34.5585	0.914934	-97.2987	0.365323	-1.81372
FOXO6	Unrelated|ENSG00000204060.8	FOXO6	1479	Unknown	15.675	2.96032	-104.673	1.9048	6.63953	9.63458	4.00048	-95.8456	3.05898	5.77923	13.8086	1.61205	-89.3401	1.11636	2.8995
RIMKLA	Unrelated|ENSG00000177181.15	RIMKLA	10577	Unknown	16.3692	5.18989	-121.663	3.32291	11.8449	12.8728	13.7692	-120.167	7.4018	98.5283	9.43717	11.555	-115.132	5.41428	-86.1162
PPCS	Unrelated|ENSG00000127125.9	PPCS	2269	Unknown	35.7428	5.37252	-127.157	4.09395	7.81236	30.9311	6.53361	-128.182	4.47311	12.1137	31.7045	5.4621	-130	3.61696	11.1502
PPIH	Unrelated|ENSG00000171960.12	PPIH	2315	Unknown	17.301	13.2769	-134.665	9.71679	20.9543	18.5509	7.08182	-126.391	4.89439	12.8045	18.1996	8.09243	-135.576	5.61055	14.5119
YBX1	Unrelated|ENSG00000065978.19	YBX1	2979	Unknown	212.007	27.6721	-209.076	19.5486	47.3477	125.979	18.5162	-193.94	11.3817	49.6205	166.789	13.6527	-201.851	9.41961	24.7959
C1orf50	Unrelated|ENSG00000164008.17	C1orf50	4760	Unknown	19.6579	4.37715	-98.9413	3.5962	5.59137	18.4295	5.30146	-110.39	3.67381	9.51861	27.007	3.29519	-115.796	2.31297	5.72737
ENSG00000283580	Unrelated|ENSG00000283580.4	ENSG00000283580	1008	Unknown	7.25904	4.98846	-82.1971	3.97513	6.69519	7.54228	7.1751	-97.4929	4.67973	15.3718	10.0319	4.03962	-97.0611	2.80707	7.20187
ERMAP	Unrelated|ENSG00000164010.15	ERMAP	3440	Unknown	26.5182	2.42211	-104.567	1.68718	4.29147	13.8596	4.42749	-101.775	2.94534	8.91237	22.8763	2.693	-104.654	1.74899	5.85115
ZNF691	Unrelated|ENSG00000164011.18	ZNF691	1935	Unknown	27.7358	2.60457	-100.712	1.97605	3.81941	21.2457	2.34633	-97.1235	1.64626	4.08233	34.8763	1.67914	-107.235	1.10985	3.44747
SLC2A1-DT.1	OtherIntrons|ENSG00000227533.7	SLC2A1-DT.1	14250	Unknown	7.14943	1.72437	-65.4775	1.10308	3.94809	9.16876	1.15626	-75.8565	0.630248	6.99142	3.77623	1.85506	-64.0399	1.15268	4.74869
Pre||snoDB1572	Pre||snoDB1572	Pre||snoDB1572	15775	Unknown	3.4857	3.65664	-75.9111	2.3215	8.6062	10.687	1.16687	-84.1716	0.615597	11.1675	2.71371	1.95219	-71.0641	1.01077	28.4509
TMEM125	Unrelated|ENSG00000179178.11	TMEM125	1850	Unknown	15.9176	4.68145	-101.174	3.6748	6.4477	3.99018	8.47059	-88.1517	5.50339	18.3806	15.8785	3.90371	-110.63	2.63248	7.54923
CDC20	Unrelated|ENSG00000117399.14	CDC20	1777	Unknown	234.242	4.64652	-165.606	3.64451	6.40842	84.9075	5.3758	-148.962	4.11152	7.76284	235.47	3.57735	-169.939	2.57821	5.84085
SZT2	Unrelated|ENSG00000198198.17	SZT2	14136	Unknown	80.8745	4.38825	-134.545	3.56177	5.71419	84.1087	4.05684	-143.36	3.04336	6.08235	94.2448	3.2824	-141.081	2.38609	5.25721
PTPRF	Unrelated|ENSG00000142949.17	PTPRF	7720	Unknown	249.548	16.1085	-193.467	12.8594	21.5544	152.2	10.9831	-187.369	7.77323	18.7087	165.876	11.965	-189.369	7.85552	25.0909
KDM4A	Unrelated|ENSG00000066135.13	KDM4A	4486	Unknown	195.519	3.40771	-151.265	2.70893	4.59233	158.704	3.86563	-155.799	2.88995	5.8359	200.637	2.94846	-158.994	2.05094	5.24274
ENSG00000284989	Unrelated|ENSG00000284989.1	ENSG00000284989	4037	Unknown	91.3223	3.28412	-131.871	2.61092	4.4251	73.0878	3.68296	-137.683	2.70697	5.75955	92.0411	2.86513	-138.914	2.01136	4.97831
ST3GAL3	Unrelated|ENSG00000126091.21	ST3GAL3	2487	Unknown	5.52032	4.33388	-78.8653	3.2375	6.55306	2.15912	5.90483	-66.6843	3.51303	18.501	3.77685	5.95611	-85.2443	3.45697	21.4967
ARTN	Unrelated|ENSG00000117407.17	ARTN	1943	Unknown	9.47183	9.40593	-128.697	5.48001	33.167	12.9534	2.61569	-99.5598	2.13679	3.37127	11.7204	2.06592	-104.325	1.55281	3.08547
IPO13	Unrelated|ENSG00000117408.11	IPO13	3883	Unknown	53.3693	7.68353	-134.066	6.43289	9.53782	74.3777	8.07678	-147.489	5.79552	13.3198	67.5758	4.85448	-142.642	3.57259	7.57109
DPH2	Unrelated|ENSG00000132768.14	DPH2	2466	Unknown	38.9402	9.12858	-146.688	6.61629	14.7167	61.6807	5.25678	-143.337	4.06498	7.43731	46.3071	4.31643	-137.485	3.41516	5.86396
ATP6V0B	Unrelated|ENSG00000117410.14	ATP6V0B	1685	Unknown	58.7192	9.93407	-144.575	8.19398	12.6125	70.1794	10.9113	-151.525	7.56283	19.5808	65.9968	7.18367	-150.094	5.26411	11.3067
B4GALT2	Unrelated|ENSG00000117411.18	B4GALT2	3443	Unknown	28.184	20.3245	-155.976	14.5012	33.9632	26.8293	9.48437	-148.415	6.70254	16.2137	22.979	7.52211	-144.617	5.83948	10.567
CCDC24	Unrelated|ENSG00000159214.13	CCDC24	1472	Unknown	3.1088	13.4142	-86.3288	10.5644	18.3692	4.54846	9.17036	-98.4101	6.16766	17.8706	3.1822	11.1885	-92.9635	6.63229	35.7422
DMAP1	Unrelated|ENSG00000178028.14	DMAP1	1742	Unknown	23.3002	6.8936	-117.021	5.54087	9.12016	25.3719	9.18079	-128.889	6.14334	18.1593	20.5073	7.81262	-121.813	5.6111	12.8571
RNF220	Unrelated|ENSG00000187147.18	RNF220	3099	Unknown	95.0958	3.49312	-133.38	2.80757	4.62163	59.9564	6.18701	-133.061	4.54201	9.7002	103.896	2.86955	-141.431	2.06698	4.69093
KIF2C	Host|ENSG00000142945.13	KIF2C	2955	Unknown	162.78	3.35091	-149.898	2.57986	4.77934	46.5043	4.38645	-127.569	3.28707	6.59076	206.828	2.68496	-158.845	1.85688	4.84608
KIF2C.1	OtherIntrons|ENSG00000142945.13	KIF2C.1	24707	Unknown	61.6568	1.63678	-111.408	1.09935	3.20219	22.8103	2.01576	-100.06	1.34647	4.00806	97.6784	1.0939	-117.671	0.551764	62.675
RPS8	Host|ENSG00000142937.12	RPS8	778	Unknown	215.567	27.1157	-203.733	20.3861	40.4776	182.44	20.0613	-200.945	12.7612	46.8777	184.705	17.6196	-205.084	11.9566	33.4733
Pre|SNORD46|snoDB0050	Pre|SNORD46|snoDB0050	Pre|SNORD46|snoDB0050	349	Unknown	3.60689	3.51156	-79.4203	2.09609	10.8145	2.85115	3.14168	-72.9622	2.06313	6.58316	3.23003	2.98166	-78.6197	1.99065	5.93755
RPS8.1	OtherIntrons|ENSG00000142937.12	RPS8.1	899	Unknown	15.1154	1.49959	-91.0262	0.744361	Inf	17.4666	0.856716	-78.7655	0.331159	-1.45941	19.4959	0.915974	-85.0188	0.437441	-9.75108
Pre|SNORD38B|snoDB0967	Pre|SNORD38B|snoDB0967	Pre|SNORD38B|snoDB0967	260	Unknown	7.93335	1.41947	-52.2789	0.991891	2.49502	2.96322	2.55484	-63.3651	1.48106	9.29061	5.39178	2.29351	-70.7753	1.39731	6.39529
PLK3	Unrelated|ENSG00000173846.13	PLK3	2340	Unknown	20.9652	1.87212	-85.6341	1.35361	3.03449	187.852	1.39854	-144.511	0.770204	7.59253	34.0847	1.62806	-101.263	1.09308	3.18872
UROD	Unrelated|ENSG00000126088.14	UROD	2138	Unknown	19.9982	12.3079	-126.143	9.94793	16.1359	27.2038	11.9382	-130.6	8.5143	19.9683	20.5397	11.0106	-131.669	7.76881	18.895
TOE1	Unrelated|ENSG00000132773.12	TOE1	1887	Unknown	37.3713	2.63217	-121.383	1.6982	5.84904	28.9707	3.09672	-108.274	2.40236	4.35564	44.4657	1.89599	-115.131	1.34466	3.21359
MMACHC	Unrelated|ENSG00000132763.15	MMACHC	5049	Unknown	16.3527	9.10652	-131.471	6.14992	17.5379	16.684	3.95049	-118.934	3.08576	5.48854	23.5119	2.94048	-127.837	2.1974	4.44289
AKR1A1	Unrelated|ENSG00000117448.14	AKR1A1	1818	Unknown	31.773	10.7294	-132.772	8.77275	13.8094	35.9954	8.65425	-139.39	6.41034	13.3152	33.7386	8.72999	-139.645	6.22192	14.6256
NASP	Unrelated|ENSG00000132780.17	NASP	3225	Unknown	47.0713	7.91989	-146.854	5.80486	12.4596	17.1733	7.49718	-120.632	4.95451	15.401	53.2872	5.26563	-146.918	3.739	8.89912
TMEM69	Unrelated|ENSG00000159596.7	TMEM69	1465	Unknown	20.1811	8.28141	-124.971	6.24299	12.2963	16.2804	7.08023	-117.323	4.97516	12.2732	26.8759	4.56482	-126.553	3.25199	7.65527
MAST2	Unrelated|ENSG00000086015.23	MAST2	5737	Unknown	95.4995	9.98641	-168.58	7.37976	15.4401	13.7473	7.84723	-110.964	5.80701	12.0976	94.7628	4.46164	-152.597	3.34909	6.68106
TSPAN1	Unrelated|ENSG00000117472.10	TSPAN1	1619	Unknown	4.15322	39.0844	-122.23	26.0454	78.2665	2.45756	14.6335	-123.528	9.61112	30.6495	1.72313	13.7916	-104.734	10.2568	21.0443
RAD54L	Unrelated|ENSG00000085999.13	RAD54L	3078	Unknown	31.7547	5.42207	-137.311	3.53991	11.5781	12.7029	4.85367	-113.209	3.56265	7.61216	36.4867	3.16531	-130.314	2.24123	5.38602
UQCRH	Unrelated|ENSG00000173660.12	UQCRH	537	Unknown	19.2443	30.4637	-153.473	21.2524	53.7678	18.7502	21.1294	-152.838	12.8722	58.9349	15.0984	19.1909	-148.649	12.6792	39.4523
NSUN4	Unrelated|ENSG00000117481.11	NSUN4	4347	Unknown	81.7756	3.0961	-132.72	2.34219	4.56574	63.6636	3.34279	-131.34	2.54146	4.88214	96.9316	2.16176	-135.823	1.53998	3.62567
FAAH	Unrelated|ENSG00000117480.16	FAAH	2042	Unknown	9.16826	19.3315	-113.426	15.8946	24.6646	8.10835	18.1066	-112.135	13.1224	29.1957	10.1348	11.7045	-124.694	8.39278	19.3333
DMBX1	Unrelated|ENSG00000197587.11	DMBX1	5050	Unknown	0.618211	7.34526	-56.4857	4.33863	23.9253	2.42364	6.28505	-76.1876	3.49406	31.2351	2.59527	1.47907	-62.2587	0.768854	19.393
CMPK1	Unrelated|ENSG00000162368.15	CMPK1	2937	Unknown	26.7178	11.8607	-146.701	8.28137	20.8893	32.2644	9.83226	-146.72	6.25645	22.9479	26.8615	10.288	-146.646	6.60852	23.2124
CDKN2C	Unrelated|ENSG00000123080.12	CDKN2C	2904	Unknown	37.3088	3.82168	-115.731	3.01373	5.22151	16.0249	5.248	-109.624	3.60466	9.64515	45.0643	3.40166	-126.053	2.20964	7.38631
RNF11	Unrelated|ENSG00000123091.5	RNF11	3074	Unknown	75.8216	9.48331	-161.242	7.05313	14.4685	69.543	8.10362	-156.814	5.36138	16.5881	81.494	6.31285	-157.584	4.26376	12.1537
TTC39A-AS1	Unrelated|ENSG00000261664.5	TTC39A-AS1	812	Unknown	5.89273	2.61607	-77.1145	1.68075	5.89857	5.46027	2.80142	-76.9823	1.97464	4.81923	4.17173	2.91095	-72.2788	1.74602	8.74668
OSBPL9	Unrelated|ENSG00000117859.19	OSBPL9	3660	Unknown	52.4772	7.97347	-148.027	5.94655	12.0967	43.593	7.78392	-154.473	5.09386	16.4948	49.7164	5.30185	-144.613	3.71161	9.27627
BTF3L4	Host|ENSG00000134717.18	BTF3L4	4533	Unknown	64.1959	5.76154	-148.221	4.14634	9.43819	60.1801	5.49523	-144.423	3.80122	9.91295	65.3776	4.28794	-151.174	2.87691	8.41537
BTF3L4.1	OtherIntrons|ENSG00000134717.18	BTF3L4.1	11555	Unknown	27.9669	1.64699	-104.776	0.911029	8.57068	50.8462	1.01172	-104.651	0.510847	51.793	212.405	0.17296	-108.134	NA	NA
Pre||snoDB1310	Pre||snoDB1310	Pre||snoDB1310	10321	Unknown	3015.34	0.0201906	-113.822	NA	NA	74.4814	0.843891	-115.744	0.303591	-1.08233	498.491	0.102122	-112.445	NA	NA
Post||snoDB1310	Post||snoDB1310	Post||snoDB1310	7829	Unknown	903.698	0.053563	-106.02	NA	NA	413.679	0.131253	-110.249	NA	NA	57.4155	0.745715	-111.694	0.216623	-0.516976
ZFYVE9	Unrelated|ENSG00000157077.16	ZFYVE9	7243	Unknown	31.4987	5.57841	-132.975	3.88835	9.86715	36.8113	6.04943	-136.16	3.75863	15.4907	19.7054	5.8207	-125.557	3.26161	27.0239
PRPF38A	Host|ENSG00000134748.13	PRPF38A	5233	Unknown	75.4566	4.58079	-139.649	3.54055	6.48663	76.5648	4.74982	-144.551	3.36132	8.09279	89.4326	3.55903	-146.833	2.51766	6.06954
PRPF38A.1	OtherIntrons|ENSG00000134748.13	PRPF38A.1	9689	Unknown	42.7115	0.784846	-91.9685	0.252343	Inf	62.6186	0.694132	-102.22	0.153235	-0.274376	309.288	0.125004	-97.1164	NA	NA
ZYG11B	Unrelated|ENSG00000162378.13	ZYG11B	8143	Unknown	88.2664	3.82586	-141.192	2.8832	5.68438	90.7659	4.30492	-150.079	2.95124	7.95264	113.421	2.74609	-148.082	1.84735	5.34782
ZYG11A	Unrelated|ENSG00000203995.10	ZYG11A	4445	Unknown	29.7963	4.12681	-123.326	2.9018	7.14172	42.8798	3.11652	-129.639	2.2691	4.97421	44.7409	2.35883	-127.627	1.58991	4.56805
SCP2	Unrelated|ENSG00000116171.19	SCP2	3926	Unknown	17.2322	10.698	-128.297	7.97019	16.2644	14.7394	10.0111	-127.684	6.46216	22.2072	15.1612	10.3855	-128.462	6.75529	22.4497
CPT2	Unrelated|ENSG00000157184.7	CPT2	2746	Unknown	75.5505	4.18293	-133.796	3.33639	5.60511	55.0397	3.97322	-131.177	2.88326	6.38812	95.6209	3.28575	-144.067	2.30208	5.73726
MAGOH-DT	Unrelated|ENSG00000226754.3	MAGOH-DT	1649	Unknown	2.29914	4.17254	-74.2383	2.45563	13.8703	5.24918	1.81527	-79.4366	0.990204	10.885	1.65159	5.61198	-68.9919	2.9469	58.6825
DIO1	Unrelated|ENSG00000211452.12	DIO1	1861	Unknown	0.359604	25.6226	-73.876	13.43	278.11	0.386067	7.93882	-82.3029	5.42653	14.7827	0.0492701	7.97408	-52.2898	4.94332	20.6104
LRRC42	Unrelated|ENSG00000116212.15	LRRC42	1764	Unknown	43.4439	5.52201	-131.514	4.24906	7.8839	33.1302	5.19246	-129.178	3.7553	8.41162	53.9183	3.28519	-133.7	2.38193	5.29195
TCEANC2	Unrelated|ENSG00000116205.14	TCEANC2	10429	Unknown	25.0418	2.95249	-104.821	2.18657	4.54427	17.8758	2.80103	-100.156	1.95561	4.93408	29.1572	2.67963	-109.048	1.88676	4.62185
MRPL37	Unrelated|ENSG00000116221.15	MRPL37	1582	Unknown	67.3408	16.1602	-169.785	11.9864	24.7935	74.6982	9.45472	-163.334	6.95929	14.7402	61.5535	8.69438	-162.729	6.43364	13.4048
ACOT11	Unrelated|ENSG00000162390.18	ACOT11	6369	Unknown	4.29475	6.99212	-89.0546	4.96906	11.7937	3.45943	4.25137	-76.7682	3.22422	6.23891	4.61002	6.11629	-89.519	3.96141	13.412
MROH7-TTC4	Unrelated|ENSG00000271723.5	MROH7-TTC4	5867	Unknown	76.1772	2.79305	-131.433	2.02867	4.48171	56.0753	3.11725	-127.197	2.34025	4.66667	91.4742	1.99378	-131.721	1.37999	3.59098
TTC4	Unrelated|ENSG00000243725.7	TTC4	2356	Unknown	83.8764	2.85923	-134.261	2.08303	4.55749	63.8281	3.10702	-128.202	2.37132	4.50453	100.83	2.01086	-134.424	1.39582	3.59486
LINC01135	Unrelated|ENSG00000234807.8	LINC01135	2518	Unknown	4.01085	4.15883	-77.8965	2.83227	7.82288	2.94979	3.58918	-75.7862	1.9604	21.2172	2.98469	6.75855	-78.7985	3.97967	22.3992
FGGY	Unrelated|ENSG00000172456.18	FGGY	2052	Unknown	2.27473	15.8407	-90.0572	11.4999	25.4454	1.20159	14.2695	-81.1861	8.14116	57.7162	2.01623	10.0783	-86.9187	5.70877	42.9602
HOOK1	Unrelated|ENSG00000134709.13	HOOK1	5713	Unknown	27.002	5.82408	-126.68	4.24068	9.29446	20.6521	6.78603	-122.319	4.2835	16.3214	21.8532	3.55162	-122.617	2.35268	7.24242
NFIA	Unrelated|ENSG00000162599.18	NFIA	9229	Unknown	28.5187	6.7862	-137.98	4.56893	13.1846	14.3292	4.16169	-109.66	3.0152	6.71498	32.5853	2.50126	-121.801	1.82835	3.95798
PATJ	Host|ENSG00000132849.22	PATJ	8621	Unknown	80.5971	7.82701	-156.163	5.94161	11.4652	20.8085	8.92574	-126.937	5.51609	23.3736	66.7601	5.55809	-152.203	3.71078	11.068
PATJ.1	OtherIntrons|ENSG00000132849.22	PATJ.1	392910	Unknown	563.229	2.12821	-180.959	1.32371	5.42578	392.771	1.29052	-167.098	0.663915	22.9619	686.484	1.30995	-180.035	0.690668	12.6731
Pre|SNODB2077|snoDB2102	Pre|SNODB2077|snoDB2102	Pre|SNODB2077|snoDB2102	7714	Unknown	4.65237	5.10882	-85.614	3.52961	9.24542	3.40251	1.44362	-60.364	0.862629	4.42166	5.59858	3.96169	-89.7594	2.48583	9.75085
Post|SNODB2077|snoDB2102	Post|SNODB2077|snoDB2102	Post|SNODB2077|snoDB2102	12166	Unknown	9.14089	2.27483	-86.3922	1.37564	6.56797	3.68922	1.54594	-54.8347	0.884133	6.14793	12.8537	0.969063	-80.9205	0.418883	-3.09167
USP1	Unrelated|ENSG00000162607.13	USP1	3602	Unknown	161.059	1.96847	-145.752	1.26258	4.46452	67.722	3.90198	-143.819	2.61872	7.6514	174.029	1.80232	-148.133	1.13436	4.38355
ATG4C	Unrelated|ENSG00000125703.15	ATG4C	2944	Unknown	7.25434	4.42905	-91.4506	3.10757	7.70601	2.3538	8.61682	-81.5878	4.46873	120.091	5.00332	5.23366	-91.2432	3.14766	15.517
ALG6	Unrelated|ENSG00000088035.18	ALG6	3325	Unknown	7.50326	10.9595	-114.886	7.61355	19.5524	7.33667	7.88228	-112.26	5.02581	18.2612	8.04578	8.29885	-118.205	4.96352	25.2988
EFCAB7	Unrelated|ENSG00000203965.13	EFCAB7	2178	Unknown	2.63776	4.12427	-70.9852	2.67985	8.9463	1.21857	13.6944	-70.8984	5.48058	-27.4597	3.60735	2.40653	-67.9359	1.4781	6.47133
PGM1	Unrelated|ENSG00000079739.17	PGM1	2657	Unknown	2.35186	11.859	-88.2164	8.29663	20.7824	1.53875	34.4102	-77.8388	12.8042	-50.0567	2.42891	14.1758	-96.2122	6.72073	-129.739
CACHD1	Unrelated|ENSG00000158966.16	CACHD1	5933	Unknown	25.8855	2.70807	-111.452	1.80073	5.45839	9.35884	3.48458	-87.5928	2.53933	5.55084	17.4014	2.2438	-99.1258	1.52032	4.28102
RAVER2	Unrelated|ENSG00000162437.15	RAVER2	4421	Unknown	15.1061	9.43613	-123.442	6.93977	14.7375	11.0718	9.87307	-118.121	6.49608	20.5625	18.4353	4.90772	-121.397	3.3698	9.02794
AK4	Unrelated|ENSG00000162433.15	AK4	6998	Unknown	27.2593	16.0181	-152.659	11.2475	27.8161	23.8257	8.11672	-143.773	5.66804	14.2904	22.8425	7.3388	-147.117	5.13513	12.8556
DNAJC6	Unrelated|ENSG00000116675.16	DNAJC6	5962	Unknown	14.1817	2.76101	-101.335	1.73976	6.68532	6.93054	7.74186	-91.6446	4.48249	28.3727	15.1667	3.20351	-99.11	1.90036	10.1937
LEPROT	Unrelated|ENSG00000213625.9	LEPROT	4625	Unknown	18.0042	9.2585	-127.75	6.76811	14.6486	17.175	7.93129	-126.267	5.1932	16.7767	18.8969	6.19501	-123.838	4.25974	11.3527
LEPR	Host|ENSG00000116678.20	LEPR	8211	Unknown	2.02596	4.50839	-77.6651	2.4484	28.4196	0.97228	21.8371	-64.0134	8.13146	-31.8552	1.07302	20.9502	-76.514	5.61847	-12.1183
LEPR.1	OtherIntrons|ENSG00000116678.20	LEPR.1	211158	Unknown	41.4565	5.29685	-134.202	3.87658	8.35954	42.6593	4.74934	-137.337	3.07653	10.4091	52.0642	3.95311	-135.234	2.66551	7.64715
MIER1	Unrelated|ENSG00000198160.15	MIER1	5456	Unknown	59.0305	2.13782	-126.988	1.33009	5.4436	11.5514	3.42354	-93.299	2.20094	7.70182	98.9099	1.40331	-130.589	0.764124	8.58248
GADD45A	Unrelated|ENSG00000116717.13	GADD45A	1352	Unknown	57.1763	1.02106	-101.984	0.497926	Inf	227.462	1.16771	-144.178	0.538367	-6.91044	61.8839	1.46323	-115.66	0.82861	6.24986
SRSF11	Unrelated|ENSG00000116754.14	SRSF11	3959	Unknown	75.1038	4.02631	-139.907	2.99671	6.1337	67.3933	4.30587	-141.691	2.98218	7.74247	81.057	3.13334	-142.779	2.17748	5.58499
HHLA3	Unrelated|ENSG00000197568.15	HHLA3	1095	Unknown	3.42282	9.04904	-89.7686	6.43276	15.2524	6.04596	10.3589	-103.373	6.67521	23.1143	3.58092	7.74548	-87.9817	4.79548	20.1267
CTH	Unrelated|ENSG00000116761.12	CTH	2090	Unknown	6.09494	4.0933	-76.8066	3.14916	5.84595	6.99397	4.18202	-90.6801	2.89513	7.5284	7.29362	3.61067	-88.144	2.51985	6.3668
FPGT-TNNI3K	Unrelated|ENSG00000259030.8	FPGT-TNNI3K	7566	Unknown	3.04166	3.60466	-74.3528	2.21387	9.69557	2.33656	6.03616	-76.3827	3.38627	27.7579	1.78254	7.44744	-63.8682	4.43207	23.2991
FPGT	Unrelated|ENSG00000254685.8	FPGT	4692	Unknown	19.0564	3.03568	-109.979	1.95887	6.74159	12.4098	5.65238	-104.056	3.71183	11.8449	16.5619	2.94577	-103.208	1.88451	6.74319
TYW3	Unrelated|ENSG00000162623.16	TYW3	3437	Unknown	13.0797	6.52508	-106.881	5.01461	9.33776	19.7507	6.89182	-123.738	4.69325	12.9656	19.136	4.24271	-115.594	2.98908	7.3075
ACADM	Unrelated|ENSG00000117054.15	ACADM	3789	Unknown	7.19242	11.72	-112.832	8.39724	19.3942	4.97872	12.8413	-103.824	8.06154	31.5435	8.54366	7.69793	-112.072	5.08155	15.868
RABGGTB	Host|ENSG00000137955.16	RABGGTB	1448	Unknown	31.4622	3.723	-125.258	2.50278	7.26504	22.9915	2.95422	-109.352	1.96588	5.94101	42.3936	2.40259	-123.38	1.65717	4.36694
Pre|SNORD45C|snoDB0059	Pre|SNORD45C|snoDB0059	Pre|SNORD45C|snoDB0059	797	Unknown	15.8729	2.13596	-97.2151	1.29121	6.17742	9.68558	2.65453	-87.8011	1.79745	5.07394	14.0426	2.4355	-100.918	1.53671	5.86693
Post|SNORD45C|snoDB0059	Post|SNORD45C|snoDB0059	Post|SNORD45C|snoDB0059	346	Unknown	3.56806	2.93409	-67.9662	1.91288	6.29442	1.89021	4.56357	-70.121	2.22273	-85.8889	4.20506	2.82526	-74.8308	1.66741	9.24497
Pre|SNORD45A|snoDB0060	Pre|SNORD45A|snoDB0060	Pre|SNORD45A|snoDB0060	284	Unknown	2.2181	4.52931	-73.0702	2.77672	12.2803	2.80352	3.72873	-71.9482	2.33676	9.22236	5.5531	2.38753	-80.5494	1.24104	31.3379
Post|SNORD45A|snoDB0060	Post|SNORD45A|snoDB0060	Post|SNORD45A|snoDB0060	1186	Unknown	47.5478	1.35254	-108.953	0.73252	8.80711	47.3584	1.37385	-104.554	0.834693	3.88018	40.0516	2.01341	-112.405	1.22593	5.62956
Post|SNORD45B|snoDB0061	Post|SNORD45B|snoDB0061	Post|SNORD45B|snoDB0061	403	Unknown	457.258	0.00871621	-63.1985	NA	NA	3.6678	1.74801	-61.6023	0.927717	15.0957	34.9224	0.147759	-64.4121	2.68042e-07	-2.68043e-07
RABGGTB.1	OtherIntrons|ENSG00000137955.16	RABGGTB.1	4012	Unknown	2052.03	0.0253058	-105.76	NA	NA	38.886	0.882802	-99.3969	0.298815	-0.925037	359.39	0.129221	-108	NA	NA
MIGA1	Unrelated|ENSG00000180488.16	MIGA1	6409	Unknown	19.858	5.14397	-122.209	3.47999	9.85735	14.1215	6.85346	-118.581	4.28286	17.1425	17.8044	6.27211	-121.638	3.68894	20.9242
DNAJB4	Unrelated|ENSG00000162616.9	DNAJB4	2903	Unknown	11.6628	0.933708	-72.0695	0.320412	Inf	7.36033	1.32657	-67.129	0.667543	104	133.351	0.078546	-74.8615	NA	NA
ADGRL2	Unrelated|ENSG00000117114.21	ADGRL2	7432	Unknown	6.63874	5.41966	-92.3402	3.8973	8.89373	2.35601	5.98871	-72.9734	3.49426	20.9299	4.8734	3.69803	-89.896	2.44486	7.58689
PRKACB	Unrelated|ENSG00000142875.20	PRKACB	4513	Unknown	11.5128	5.76732	-118.119	3.56193	15.1436	6.26653	23.8993	-106.591	9.69344	-51.3395	8.25035	8.70079	-112.487	4.79925	46.5151
RPF1	Unrelated|ENSG00000117133.11	RPF1	1948	Unknown	31.8279	4.49067	-124.588	3.25441	7.24152	42.718	4.95458	-135	3.31078	9.84024	45.2405	2.83848	-128.778	1.8664	5.92372
CCN1	Unrelated|ENSG00000142871.18	CCN1	2278	Unknown	5939.27	0.0126237	-118.002	NA	NA	1035.46	0.141543	-133.252	NA	NA	654.77	0.141501	-123.415	NA	NA
SH3GLB1	Unrelated|ENSG00000097033.14	SH3GLB1	6456	Unknown	32.0979	6.46996	-131.011	4.83424	9.77872	27.7593	8.4095	-134.566	5.26289	20.9132	27.7029	6.58688	-133.996	4.16243	15.7755
HS2ST1	Unrelated|ENSG00000153936.18	HS2ST1	6759	Unknown	28.3468	8.65648	-137.876	6.26917	13.9801	9.87018	9.89451	-112.19	5.86792	31.5318	20.8065	6.03563	-129.196	3.88133	13.5645
ENSG00000267561	Unrelated|ENSG00000267561.2	ENSG00000267561	2013	Unknown	6.62683	7.99776	-103.145	5.65331	13.6645	2.45567	11.3645	-78.0922	6.32897	55.6062	4.94476	5.56951	-98.5579	3.21532	20.7956
LMO4	Unrelated|ENSG00000143013.13	LMO4	4993	Unknown	37.5068	1.0452	-98.5429	0.454107	Inf	11.0567	7.09558	-94.7294	4.77102	13.8377	48.2974	1.15958	-105.207	0.535496	-7.00959
PKN2	Host|ENSG00000065243.20	PKN2	6070	Unknown	37.9569	5.49106	-131.643	4.07732	8.40553	17.645	7.65127	-117.702	4.74353	19.7702	53.48	3.5527	-137.343	2.43521	6.56558
PKN2.1	OtherIntrons|ENSG00000065243.20	PKN2.1	127736	Unknown	133.215	1.24066	-135.763	0.584388	Inf	255.634	0.678523	-140.408	0.150993	-0.272091	241.074	0.778894	-137.396	0.258282	-0.76687
Pre||snoDB1277	Pre||snoDB1277	Pre||snoDB1277	8261	Unknown	5.45621	2.14526	-73.7136	1.2549	7.38482	8.49314	1.39855	-78.4947	0.623977	-5.79457	12.0458	1.10721	-77.4848	0.496319	-4.79648
Post||snoDB1277	Post||snoDB1277	Post||snoDB1277	9804	Unknown	12.0027	1.44423	-88.383	0.6458	Inf	12.9204	1.23377	-84.4982	0.575239	-8.52111	21.7396	0.950002	-89.3045	0.365894	-1.59293
LRRC8B	Unrelated|ENSG00000197147.15	LRRC8B	8034	Unknown	78.4578	2.4357	-131.725	1.6768	4.44946	51.2531	3.69141	-130.197	2.52577	6.85497	68.0585	2.10484	-127.914	1.43281	3.96416
LRRC8C	Unrelated|ENSG00000171488.15	LRRC8C	7170	Unknown	1.67473	3.62853	-58.1953	2.30032	8.58614	4.60887	2.69113	-73.7121	1.40609	31.26	1.97934	3.01351	-63.2719	1.67382	15.0957
LRRC8D	Unrelated|ENSG00000171492.14	LRRC8D	3950	Unknown	31.947	5.03091	-129.298	3.57143	8.50752	23.6592	5.3945	-123.265	3.52446	11.492	24.6443	2.86765	-118.573	1.9615	5.32989
ZNF326	Unrelated|ENSG00000162664.17	ZNF326	9729	Unknown	19.1905	5.84779	-119.834	4.19694	9.6394	20.4426	3.65218	-117.832	2.50429	6.74297	18.7496	4.26528	-118.518	2.86496	8.34325
CDC7	Unrelated|ENSG00000097046.13	CDC7	3313	Unknown	17.3978	3.18738	-110.214	2.02974	7.41833	6.02774	3.37649	-85.8847	2.22634	6.98505	18.9153	2.29407	-108.406	1.54323	4.46789
EPHX4	Unrelated|ENSG00000172031.7	EPHX4	1436	Unknown	1.30167	11.4946	-75.7629	7.79324	21.8925	1.30837	10.4643	-69.5026	6.25787	31.9218	0.797953	11.1661	-65.9889	5.69488	284.36
BTBD8	Unrelated|ENSG00000189195.15	BTBD8	5999	Unknown	6.63263	3.55884	-89.228	2.30534	7.80001	4.78656	4.86116	-84.9282	2.89428	15.1709	4.6314	5.35372	-88.2037	2.85654	42.5564
RPAP2	Unrelated|ENSG00000122484.9	RPAP2	16899	Unknown	41.7232	3.90635	-131.829	2.68087	7.1956	32.78	4.85304	-127.595	3.10887	11.0555	36.5099	3.81646	-128.571	2.37925	9.63902
RPL5	Host|ENSG00000122406.14	RPL5	1028	Unknown	117.529	18.401	-185.794	13.5786	28.5352	107.93	13.5478	-183.042	8.77178	29.741	100.007	12.4221	-184.083	8.49709	23.0863
RPL5.1	OtherIntrons|ENSG00000122406.14	RPL5.1	6668	Unknown	41.821	1.74328	-111.375	1.06371	4.82728	72.158	0.815592	-115.622	0.242558	-0.598617	496.293	0.126164	-113.422	NA	NA
Post|SNORA66|snoDB0063	Post|SNORA66|snoDB0063	Post|SNORA66|snoDB0063	914	Unknown	8.39706	0.705143	-64.9456	0.113999	Inf	30.8119	0.159972	-63.5734	1.17638e-06	-1.17639e-06	6.52793	0.797744	-55.3149	0.282768	-0.971442
MTF2	Unrelated|ENSG00000143033.18	MTF2	4075	Unknown	33.5668	2.55537	-115.05	1.71359	5.02272	29.5265	2.51162	-112.323	1.66868	5.07558	49.9218	1.41348	-115.547	0.871132	3.74503
CCDC18	Unrelated|ENSG00000122483.18	CCDC18	4867	Unknown	3.91717	6.88867	-96.1151	4.28351	17.5814	1.02429	27.5663	-84.9745	11.9519	-89.9579	9.50135	2.31285	-93.5097	1.42155	6.20056
DR1	Unrelated|ENSG00000117505.13	DR1	10124	Unknown	77.3565	4.20776	-141.104	3.15465	6.31633	96.3577	3.89836	-147.018	2.7923	6.45545	95.8954	3.12482	-145.202	2.18249	5.49922
FNBP1L	Unrelated|ENSG00000137942.18	FNBP1L	5341	Unknown	68.9993	4.41266	-143.985	3.15036	7.36282	43.923	5.1795	-140.258	3.21425	13.3293	67.3482	2.72058	-140.277	1.75603	6.03605
ABCD3	Unrelated|ENSG00000117528.14	ABCD3	3604	Unknown	18.6526	12.805	-140.132	8.89155	22.8715	11.6861	6.77522	-116.851	4.73043	11.9337	15.9669	6.07723	-124.694	4.25746	10.614
TLCD4	Unrelated|ENSG00000152078.10	TLCD4	6805	Unknown	2.10959	11.3667	-88.4813	7.563	22.8674	0.90576	7.97949	-76.4035	4.55673	32.0644	2.21745	6.0185	-84.497	3.79926	14.4718
TLCD4-RWDD3	Unrelated|ENSG00000271092.5	TLCD4-RWDD3	1491	Unknown	2.66043	4.52299	-68.8196	3.1376	8.09911	1.08341	13.0682	-60.0889	6.87517	131.709	2.02466	5.7948	-73.6626	3.16807	33.9126
RWDD3	Unrelated|ENSG00000122481.17	RWDD3	1180	Unknown	5.74662	2.78611	-80.759	1.73388	7.08677	1.87873	15.1135	-76.6975	6.68652	-58.0637	3.66113	3.94992	-77.495	2.23495	16.9775
PTBP2	Unrelated|ENSG00000117569.19	PTBP2	12014	Unknown	21.9776	6.68061	-125.315	4.85022	10.7299	20.6021	5.27411	-123.92	3.40427	11.7011	25.9634	3.69575	-123.043	2.49489	7.12537
SNX7	Unrelated|ENSG00000162627.17	SNX7	1736	Unknown	10.4337	10.7233	-120.791	7.59174	18.2524	8.93257	11.0881	-117.273	6.61849	34.1508	9.97818	10.4555	-119.288	6.24019	32.2222
AGL	Unrelated|ENSG00000162688.17	AGL	7446	Unknown	12.3122	10.7797	-125.218	7.60038	18.5319	7.64236	5.946	-104.846	3.78076	13.9152	12.4023	5.7918	-120.374	3.88512	11.3735
SLC35A3	Unrelated|ENSG00000117620.15	SLC35A3	14321	Unknown	18.4178	8.19601	-128.686	5.76365	14.1804	11.4071	6.37989	-117.252	4.0806	14.615	18.6816	4.70774	-124.018	3.21229	8.80838
ENSG00000283761	Unrelated|ENSG00000283761.1	ENSG00000283761	2729	Unknown	53.3597	3.42407	-123.355	2.64673	4.84791	54.1766	3.264	-128.12	2.38708	5.15933	55.6107	2.68782	-127.317	1.8953	4.61943
MFSD14A	Unrelated|ENSG00000156875.14	MFSD14A	2779	Unknown	85.3813	2.23584	-125.804	1.63014	3.55779	72.7619	2.87674	-133.039	2.06799	4.72433	84.2253	2.0347	-130.637	1.35439	4.08823
TRMT13	Unrelated|ENSG00000122435.11	TRMT13	3128	Unknown	4.19516	5.34099	-86.6664	3.57176	10.5833	4.77225	3.96575	-83.0019	2.41153	11.1552	7.98212	2.25306	-78.4557	1.62796	3.65744
RTCA	Unrelated|ENSG00000137996.13	RTCA	2526	Unknown	11.5181	6.97155	-101.943	5.53083	9.42724	9.7964	7.58832	-105.789	4.81222	17.9344	10.6195	5.90568	-106.011	4.16482	10.1471
CDC14A	Unrelated|ENSG00000079335.20	CDC14A	4231	Unknown	14.9627	2.17073	-93.0602	1.38415	5.02811	1.81922	12.639	-73.0666	6.0631	-149.442	13.6297	2.04982	-92.0621	1.17224	8.15446
SLC30A7	Unrelated|ENSG00000162695.12	SLC30A7	8204	Unknown	26.8049	5.93852	-127.653	4.29059	9.64174	7.16476	5.78385	-95.9466	3.61427	14.4699	31.2758	3.58369	-125.897	2.45691	6.61951
DPH5-DT	Unrelated|ENSG00000233184.9	DPH5-DT	3992	Unknown	3.11361	6.08576	-84.0543	3.99213	12.797	3.96226	1.99553	-66.9839	1.2329	5.23157	4.47114	2.61977	-83.4641	1.7566	5.15078
RNPC3	Unrelated|ENSG00000185946.16	RNPC3	3641	Unknown	17.6196	2.65406	-103.268	1.72133	5.79318	13.9673	3.65969	-96.0052	2.37888	7.92836	14.6252	2.70906	-97.3139	1.65158	7.53116
SLC25A24P1	Unrelated|ENSG00000241361.8	SLC25A24P1	1569	Unknown	2.20096	9.56521	-77.5424	7.03385	14.9429	2.24039	4.90537	-80.9537	2.83142	18.3363	3.06876	3.60908	-80.6116	2.32956	8.00684
ENSG00000224698	Unrelated|ENSG00000224698.1	ENSG00000224698	2481	Unknown	17.963	2.29358	-86.0492	1.73279	3.39103	15.5045	2.69476	-88.7528	1.96491	4.28718	20.1905	1.683	-94.1011	1.16965	2.99941
NBPF6	Unrelated|ENSG00000186086.19	NBPF6	3356	Unknown	6.65442	2.49733	-75.1069	1.68118	4.85358	1.69604	5.09917	-63.3205	2.84877	24.2764	6.23919	2.33336	-79.8372	1.48329	5.46579
FAM102B	Unrelated|ENSG00000162636.16	FAM102B	5584	Unknown	59.6841	6.06835	-145.871	4.46043	9.489	45.7119	5.3167	-146.41	3.62471	9.97115	57.7337	4.52908	-152.208	3.15987	7.99224
PRPF38B	Unrelated|ENSG00000134186.12	PRPF38B	4831	Unknown	58.2831	2.49228	-126.264	1.69704	4.69009	69.105	2.38408	-129.126	1.58398	4.81754	72.3612	1.7198	-128.62	1.14716	3.43393
STXBP3	Unrelated|ENSG00000116266.11	STXBP3	2489	Unknown	25.0562	3.83248	-116.334	2.7219	6.47398	31.8456	4.60018	-129.006	3.0455	9.39737	23.4264	3.5812	-117.084	2.26797	8.5071
GPSM2	Unrelated|ENSG00000121957.15	GPSM2	7433	Unknown	44.144	4.70146	-129.355	3.56674	6.89506	20.1818	7.25093	-119.884	5.1621	12.1792	45.3685	3.61889	-130.33	2.41027	7.25875
TMEM167B	Unrelated|ENSG00000215717.7	TMEM167B	2808	Unknown	42.1753	3.38915	-120.138	2.54988	5.05193	25.7227	5.81007	-118.685	3.87809	11.5779	43.3512	2.93744	-125.333	1.99392	5.57602
SCARNA2	snoDB0046	SCARNA2	420	Unknown	37.4695	54.0962	-166.147	41.0383	79.3419	62.8808	69.3147	-189.807	29.0738	-180.461	46.6512	38.1549	-180.257	22.6143	121.98
ELAPOR1	Unrelated|ENSG00000116299.17	ELAPOR1	6880	Unknown	5.9982	22.8966	-112.424	17.788	32.122	3.54999	31.9549	-106.838	17.2787	212.155	4.38683	16.4745	-114.477	10.4285	39.2024
SARS1	Unrelated|ENSG00000031698.13	SARS1	1914	Unknown	105.495	8.92557	-159.403	7.17816	11.7975	133.243	7.2657	-169.087	5.2915	11.5897	113.309	6.45505	-165.708	4.60757	10.7757
CELSR2	Unrelated|ENSG00000143126.8	CELSR2	11015	Unknown	118.981	15.2679	-183.184	11.2311	23.8352	156.782	8.27319	-178.65	6.08147	12.9348	116.757	6.53287	-169.83	4.98152	9.48748
ATXN7L2	Unrelated|ENSG00000162650.17	ATXN7L2	2526	Unknown	32.0245	1.90215	-106.844	1.19621	4.64109	53.0527	2.12708	-118.285	1.42157	4.22283	44.7416	1.72691	-119.925	0.967903	8.00136
CYB561D1	Unrelated|ENSG00000174151.15	CYB561D1	5077	Unknown	93.3223	2.40246	-124.962	1.85782	3.39889	52.2833	4.17251	-124.876	3.01305	6.7825	101.315	2.34302	-132.518	1.64496	4.07032
GNAI3	Unrelated|ENSG00000065135.12	GNAI3	9044	Unknown	63.6331	7.54883	-151.624	5.61248	11.5251	60.0076	6.30171	-147.617	4.28134	11.9328	73.4503	5.5664	-156.656	3.70748	11.164
AMPD2	Unrelated|ENSG00000116337.20	AMPD2	4081	Unknown	27.8305	8.08049	-130.675	6.17891	11.6729	42.1686	5.58356	-140.548	4.11314	8.69027	36.2863	3.97622	-131.312	3.04329	5.73399
GSTM4	Unrelated|ENSG00000168765.18	GSTM4	3990	Unknown	4.59417	13.6862	-96.2329	10.7661	18.7797	3.55761	10.9837	-99.597	7.54054	20.2135	3.60039	12.1207	-99.1834	7.461	32.2829
CSF1	Unrelated|ENSG00000184371.14	CSF1	3994	Unknown	9.22785	3.50559	-104.964	1.98429	15.0241	26.9222	1.98934	-103.821	1.46563	3.09539	11.0857	1.48577	-88.4964	1.05289	2.52312
AHCYL1	Unrelated|ENSG00000168710.18	AHCYL1	4313	Unknown	53.9423	11.8883	-156.883	8.96188	17.6524	34.0277	8.91966	-143.924	5.98061	17.5387	61.6231	7.63255	-157.475	5.38421	13.1049
STRIP1	Unrelated|ENSG00000143093.15	STRIP1	3257	Unknown	61.2289	3.71907	-124.852	2.9834	4.93631	74.3734	4.27009	-140.91	3.09482	6.88449	78.7687	2.5775	-133.47	1.9087	3.96777
KCNC4	Unrelated|ENSG00000116396.15	KCNC4	18750	Unknown	3.18378	3.93021	-77.8585	2.41444	10.5592	1.39562	15.2706	-67.371	7.45334	-312.783	3.56427	4.73805	-72.8075	2.91116	12.7212
RBM15	Unrelated|ENSG00000162775.17	RBM15	4129	Unknown	437.348	1.0437	-152.364	0.507774	Inf	223.613	2.27112	-150.509	1.60845	3.86241	381.706	1.1868	-157.086	0.589853	-98.6868
LAMTOR5-AS1	Unrelated|ENSG00000224699.11	LAMTOR5-AS1	2726	Unknown	2.90595	3.34784	-62.6699	2.3209	6.00478	2.57123	3.58337	-65.312	2.29105	8.22015	1.80111	5.2274	-72.9263	3.06575	17.726
CEPT1	Unrelated|ENSG00000134255.16	CEPT1	2251	Unknown	21.1195	5.26518	-116.499	3.91152	8.0516	23.7462	4.73871	-122.067	3.20538	9.08431	22.4679	3.89733	-120.526	2.6894	7.07506
ATP5PB	Unrelated|ENSG00000116459.11	ATP5PB	2628	Unknown	77.8814	15.1132	-174.044	10.9663	24.3036	70.6765	11.3502	-170.088	7.36177	24.7703	69.2711	10.2083	-172.055	6.77372	20.7082
RAP1A	Unrelated|ENSG00000116473.15	RAP1A	5018	Unknown	25.0713	10.8987	-141.28	7.80128	18.0753	18.3017	9.00217	-130.246	5.89951	18.9886	22.1019	7.00372	-132.623	4.66903	14.0085
DDX20	Unrelated|ENSG00000064703.13	DDX20	4658	Unknown	132.064	1.74759	-138.783	1.07157	4.73433	90.8478	2.7026	-137.62	1.91974	4.56366	165.973	1.17138	-137.947	0.651934	5.76392
CTTNBP2NL	Unrelated|ENSG00000143079.15	CTTNBP2NL	5864	Unknown	90.6476	3.16311	-140.045	2.2869	5.12777	106.653	2.65751	-145.186	1.76233	5.40095	111.928	2.11463	-142.617	1.31816	5.34301
WNT2B	Unrelated|ENSG00000134245.18	WNT2B	11130	Unknown	1.86715	8.26081	-84.8316	4.96342	24.6105	91.0201	0.132844	-72.7387	NA	NA	0.915794	6.5807	-58.0633	3.48455	59.0378
CAPZA1	Host|ENSG00000116489.13	CAPZA1	2358	Unknown	95.894	11.9218	-177.192	8.35448	20.8061	88.8283	8.55307	-167.622	5.56554	18.4648	102.213	7.46282	-175.127	4.98889	14.8039
CAPZA1.1	OtherIntrons|ENSG00000116489.13	CAPZA1.1	45299	Unknown	135.183	1.31927	-134.181	0.694372	13.1849	1447.56	0.149185	-143.937	NA	NA	295.174	0.576987	-135.711	0.0994459	-0.151758
Pre|snoU13|snoDB1656	Pre|snoU13|snoDB1656	Pre|snoU13|snoDB1656	3118	Unknown	26.505	1.50437	-102.954	0.7735	27.2992	53.0363	0.660892	-99.3191	0.135094	-0.228517	38.638	0.861448	-100.808	0.330471	-1.41982
Post|snoU13|snoDB1656	Post|snoU13|snoDB1656	Post|snoU13|snoDB1656	909	Unknown	78.8481	0.0893743	-64.1072	NA	NA	66.3168	0.113811	-68.1572	NA	NA	5.38233	1.04371	-63.054	0.491163	-8.35114
MOV10	Unrelated|ENSG00000155363.19	MOV10	4100	Unknown	47.0964	15.3039	-158.27	11.585	22.5393	48.0107	9.10495	-156.773	6.48951	15.2518	42.1999	9.25864	-157.107	6.44832	16.4109
SLC16A1-AS1	Unrelated|ENSG00000226419.8	SLC16A1-AS1	8803	Unknown	5.09118	2.21704	-73.2026	1.29984	7.53149	4.40571	1.80515	-73.7286	1.01342	8.25231	10.8038	1.10806	-78.3436	0.574633	15.4521
LRIG2	Unrelated|ENSG00000198799.12	LRIG2	11566	Unknown	114.137	1.74864	-129.686	1.16639	3.49161	126.09	2.14496	-140.348	1.39506	4.63819	185.372	1.18082	-137.704	0.629761	9.44905
MAGI3	Unrelated|ENSG00000081026.19	MAGI3	6874	Unknown	39.6375	4.75777	-126.677	3.62366	6.92517	32.1387	6.62714	-132.65	4.11069	17.0878	40.7275	3.23404	-128.51	2.21339	6.00143
AP4B1-AS1	Unrelated|ENSG00000226167.1	AP4B1-AS1	1734	Unknown	17.1295	2.97133	-107.167	1.9049	6.75051	13.7763	7.72691	-106.623	4.8475	19.0318	17.4975	4.40908	-111.486	2.59869	14.5349
DCLRE1B	Unrelated|ENSG00000118655.8	DCLRE1B	3755	Unknown	732.409	1.3072	-170.476	0.73876	5.67002	311.215	2.53737	-160.243	1.90005	3.81804	707.328	1.25215	-172.884	0.696529	6.18975
HIPK1	Unrelated|ENSG00000163349.22	HIPK1	8201	Unknown	896.142	4.56751	-197.419	3.58099	6.30425	787.701	5.7992	-205.954	3.95082	10.8976	1018.39	3.45499	-204.064	2.37392	6.34399
OLFML3	Unrelated|ENSG00000116774.12	OLFML3	1961	Unknown	0.486633	13.4339	-63.6997	8.0421	40.7635	2.5595	2.60493	-68.8456	1.48702	10.4947	1.37195	2.7804	-57.1013	1.63396	9.31852
VANGL1	Host|ENSG00000173218.15	VANGL1	8671	Unknown	283.89	3.39367	-160.981	2.67704	4.63423	172.609	3.97325	-161.175	2.92799	6.1791	322.086	2.63393	-167.997	1.81403	4.80626
VANGL1.1	OtherIntrons|ENSG00000173218.15	VANGL1.1	41996	Unknown	377.965	0.985364	-145.039	0.479302	Inf	269.406	1.32449	-150.373	0.744341	6.00438	418.401	0.930679	-150	0.401848	-2.9452
Pre||snoDB1490	Pre||snoDB1490	Pre||snoDB1490	4163	Unknown	25.0928	0.579001	-76.8153	0.0752749	Inf	9.12704	1.44314	-82.0685	0.851519	4.72825	14.9654	0.908186	-83.4752	0.292229	-0.819823
SLC22A15	Unrelated|ENSG00000163393.13	SLC22A15	4705	Unknown	2.79035	3.97856	-79.9422	2.24732	17.325	3.23313	11.4113	-82.3491	5.71225	4949.26	4.90152	3.2683	-86.5193	1.74241	26.3
ATP1A1	Unrelated|ENSG00000163399.16	ATP1A1	3763	Unknown	419.722	15.1271	-209.748	11.5439	21.9356	447.91	8.82771	-205.521	6.25674	14.9854	362.758	9.25651	-204.909	6.61884	15.3893
PTGFRN	Unrelated|ENSG00000134247.10	PTGFRN	6314	Unknown	85.9666	10.6817	-160.909	8.42823	14.5801	86.1532	8.57953	-162.988	5.79562	16.5101	59.1705	6.96017	-154.635	4.60005	14.2938
CD101	Unrelated|ENSG00000134256.13	CD101	3542	Unknown	1.31611	5.9074	-70.136	3.443	20.7837	2.17645	6.1479	-67.6888	3.81701	15.7906	0.540975	69.3147	-56.6275	8.80737	-11.8081
TTF2	Unrelated|ENSG00000116830.12	TTF2	9439	Unknown	112.169	4.60679	-154.338	3.38152	7.22454	89.5221	3.9399	-144.856	2.86294	6.31571	139.866	2.96073	-157.292	2.16383	4.68681
MAN1A2	Host|ENSG00000198162.12	MAN1A2	8576	Unknown	73.8137	8.84912	-159.168	6.56731	13.5608	47.6403	20.7189	-156.561	11.6727	92.0796	71.5826	8.19204	-160.208	5.12829	20.349
MAN1A2.1	OtherIntrons|ENSG00000198162.12	MAN1A2.1	134685	Unknown	164.003	1.615	-147.195	0.878661	9.97019	289.765	1.10624	-154.852	0.461102	-2.77166	295.706	0.933997	-146.218	0.383593	-2.14778
Pre||snoDB1591	Pre||snoDB1591	Pre||snoDB1591	9716	Unknown	16.9919	1.51012	-96.7763	0.708731	Inf	19.9003	1.00919	-92.2297	0.387726	-1.67405	29.3056	0.947056	-92.0005	0.389779	-2.20386
Post||snoDB1591	Post||snoDB1591	Post||snoDB1591	8196	Unknown	13.0016	1.82042	-90.6349	1.0114	9.09722	142.539	0.15237	-92.6557	3.89411e-07	-3.89413e-07	28.3167	0.892532	-94.7639	0.315065	-1.07166
TENT5C	Unrelated|ENSG00000183508.5	TENT5C	5654	Unknown	100.836	1.64758	-126.103	1.06677	3.61677	1328.48	0.136353	-129.552	NA	NA	3219.81	0.0477197	-124.215	NA	NA
WDR3	Unrelated|ENSG00000065183.16	WDR3	10004	Unknown	58.6196	5.52772	-151.175	3.67736	11.1261	67.9588	4.35478	-151.734	3.1082	7.27086	67.2456	2.90014	-145.419	2.08525	4.76051
WARS2-AS1.1	OtherIntrons|ENSG00000231365.7	WARS2-AS1.1	23015	Unknown	12518.7	0.00343748	-107.45	NA	NA	33.7154	1.35248	-105.252	0.661541	-30.4354	37.5347	1.16545	-102.585	0.593225	32.9266
Pre|snoU13|snoDB1946	Pre|snoU13|snoDB1946	Pre|snoU13|snoDB1946	108294	Unknown	356.599	0.564577	-140.154	0.0667423	Inf	1536.82	0.127791	-138.158	NA	NA	174.357	1.11623	-134.558	0.522132	-8.09824
PHGDH	Unrelated|ENSG00000092621.13	PHGDH	2585	Unknown	13.1469	24.5593	-138.956	17.7747	39.7204	8.9373	13.1654	-128.257	9.48929	21.4909	11.4375	10.3827	-134.765	7.97241	14.8821
NBPF8	Unrelated|ENSG00000270231.5	NBPF8	7256	Unknown	26.0363	5.50087	-115.935	4.35814	7.45584	28.4055	5.646	-117.708	4.27645	8.30601	34.551	3.75706	-119.549	2.84129	5.54391
NOTCH2NLR	Unrelated|ENSG00000286106.3	NOTCH2NLR	2089	Unknown	10.88	4.12925	-89.9879	3.20582	5.79988	9.70404	6.80277	-97.1718	4.8773	11.2402	9.95361	3.82485	-90.9761	2.72784	6.39771
NBPF26	Unrelated|ENSG00000273136.8	NBPF26	5270	Unknown	55.9809	3.83846	-124.542	3.05461	5.16347	74.8633	4.29043	-134.604	3.25931	6.27586	75.1994	2.93607	-127.371	2.22277	4.32352
LINC00623	Unrelated|ENSG00000226067.7	LINC00623	1261	Unknown	6.45648	3.87747	-85.5984	2.70389	6.85105	1.23438	30.9204	-70.1253	11.8828	-51.3525	6.8332	5.61283	-98.0594	3.0691	32.7897
SRGAP2C	Unrelated|ENSG00000171943.12	SRGAP2C	7091	Unknown	68.4679	3.41876	-124.961	2.74554	4.52939	15.3663	8.47695	-106.156	5.55691	17.8641	61.7947	2.71997	-129.036	1.84531	5.17095
EMBP1	Unrelated|ENSG00000231752.8	EMBP1	2617	Unknown	1.22039	17.8419	-70.7614	13.838	25.1062	0.846549	27.9007	-73.2484	13.9436	-28676.3	0.616405	22.2992	-70.3841	13.4723	64.6725
LINC02591	Unrelated|ENSG00000263590.2	LINC02591	5243	Unknown	3.19422	2.88269	-71.7395	1.68093	10.1125	0.345092	32.0085	-38.4513	8.00225	-16.0048	3.30121	4.72187	-70.9156	2.84843	13.795
ENSG00000289318	Unrelated|ENSG00000289318.2	ENSG00000289318	963	Unknown	5.61995	5.34696	-83.9348	4.0215	7.97571	3.89586	3.93007	-71.9657	2.63806	7.70237	5.97407	4.01618	-82.4048	2.7281	7.60866
SRGAP2D	Unrelated|ENSG00000270872.2	SRGAP2D	1021	Unknown	15.0108	2.75081	-88.4535	2.07463	4.0809	1.97224	15.8656	-66.5981	7.90366	-2151.53	11.3876	2.63727	-86.6722	1.75439	5.30894
FAM72D	Unrelated|ENSG00000215784.6	FAM72D	2423	Unknown	36.5953	1.62271	-100.681	1.05674	3.49399	15.6924	2.74719	-95.7304	1.99232	4.42307	45.1854	1.36163	-110.053	0.762254	6.37252
GPR89A	Unrelated|ENSG00000117262.19	GPR89A	2124	Unknown	6.92022	8.88206	-100.981	6.69392	13.1954	17.5245	8.24716	-120.487	5.70564	14.8715	17.3717	6.12788	-123.096	4.248	10.9924
POLR3C	Unrelated|ENSG00000186141.10	POLR3C	4083	Unknown	105.083	4.2199	-146.553	3.22771	6.0928	83.7049	4.48452	-147.007	3.32539	6.88414	114.605	2.84545	-148.779	2.04432	4.6791
NUDT17	Unrelated|ENSG00000186364.12	NUDT17	1473	Unknown	3.44262	9.58842	-84.2213	7.35761	13.7606	4.5274	10.8904	-87.1828	7.44984	20.2356	4.27406	8.00352	-98.2349	5.19281	17.447
GNRHR2	Unrelated|ENSG00000211451.13	GNRHR2	1599	Unknown	6.81551	1.65849	-66.4415	0.997849	4.90774	2.12624	3.43322	-59.6278	2.20458	7.75541	5.13231	1.4495	-65.7619	0.799041	7.79532
POLR3GL	Unrelated|ENSG00000121851.13	POLR3GL	1178	Unknown	6.84144	7.80649	-100.082	5.73049	12.2411	7.59086	9.67352	-97.5207	6.53783	18.5894	8.14251	9.43296	-105.997	5.34161	40.3012
LINC01719	Unrelated|ENSG00000233396.9	LINC01719	4486	Unknown	9.94534	2.66045	-83.5923	1.87161	4.59869	6.10307	4.73871	-81.0781	3.2078	9.06491	9.42428	2.41889	-84.9398	1.5631	5.3455
ENSG00000287978	Unrelated|ENSG00000287978.1	ENSG00000287978	668	Unknown	14.307	1.38441	-88.9675	0.639836	Inf	11.2755	1.85208	-84.2392	1.05562	7.54406	8.64135	2.01445	-85.0737	1.12025	9.98313
NBPF12	Unrelated|ENSG00000268043.9	NBPF12	7435	Unknown	87.054	2.84127	-132.833	2.11836	4.31317	97.5466	3.80389	-141.67	2.77033	6.06762	123.456	2.24792	-137.706	1.56901	3.96253
PDIA3P1	Unrelated|ENSG00000180867.11	PDIA3P1	2212	Unknown	11.2705	6.14044	-105.328	4.55399	9.42311	9.63449	9.86336	-100.269	6.79203	18.0053	7.55352	9.77731	-104.873	5.83193	30.2248
ENSG00000237188	Unrelated|ENSG00000237188.5	ENSG00000237188	2981	Unknown	25.6723	15.4843	-146.715	11.3806	24.2167	24.9737	11.3393	-141.871	7.53883	22.8666	23.1694	8.29313	-133.388	5.78355	14.65
CHD1L	Unrelated|ENSG00000131778.20	CHD1L	2967	Unknown	27.493	15.9827	-149.414	11.6834	25.2884	26.225	10.8012	-144.235	7.2092	21.5268	22.9585	8.41484	-134.699	5.93131	14.4762
BCL9	Unrelated|ENSG00000116128.12	BCL9	6189	Unknown	158.972	3.29467	-145.576	2.61253	4.45891	196.908	3.30614	-158.673	2.45678	5.05313	138.017	2.6133	-148.164	1.87979	4.28559
GPR89B	Unrelated|ENSG00000188092.15	GPR89B	2160	Unknown	7.22308	8.29363	-98.4314	6.37257	11.8728	18.0938	8.38903	-122.292	5.64609	16.3151	18.7501	5.86397	-123.922	3.95905	11.302
ABHD17AP1	Unrelated|ENSG00000198658.4	ABHD17AP1	933	Unknown	2.23391	4.72142	-72.2924	2.98705	11.2584	1.62747	14.9797	-75.2253	7.36228	-432.18	1.45603	5.48352	-67.1131	3.23071	18.1162
PDE4DIP	Unrelated|ENSG00000178104.20	PDE4DIP	8824	Unknown	251.507	2.61676	-151.725	2.0256	3.69518	192.154	5.06966	-160.043	3.60188	8.55643	292.258	2.50704	-162.434	1.63146	5.41108
ENSG00000274265	Unrelated|ENSG00000274265.5	ENSG00000274265	1741	Unknown	3.88087	2.58499	-72.2355	1.51912	8.66383	1.32516	4.45614	-56.3103	2.45951	23.677	4.84568	2.34675	-70.3585	1.37222	8.09715
NOTCH2NLC	Unrelated|ENSG00000286219.2	NOTCH2NLC	8729	Unknown	54.4261	3.36544	-125.846	2.53731	4.99604	53.4216	3.70844	-130.481	2.71881	5.83082	67.9112	2.2079	-129.47	1.51352	4.07946
ENSG00000286185	Unrelated|ENSG00000286185.1	ENSG00000286185	14425	Unknown	76.1405	2.87665	-125.711	2.23854	4.0236	76.6999	3.78129	-136.685	2.87231	5.53196	95.1469	2.3508	-132.18	1.70165	3.80068
NBPF19	Unrelated|ENSG00000271383.8	NBPF19	13941	Unknown	72.1358	2.32893	-123.692	1.69069	3.74125	67.8085	3.1476	-132.24	2.32224	4.88315	91.3903	2.03855	-129.184	1.41926	3.61672
BOLA1	Unrelated|ENSG00000178096.9	BOLA1	1096	Unknown	54.8163	3.44379	-125.397	2.63072	4.98425	42.9076	3.56772	-124.111	2.79075	4.94422	56.5697	2.56839	-130.969	1.81453	4.39384
VPS45	Unrelated|ENSG00000136631.16	VPS45	4196	Unknown	46.9283	7.81004	-140.492	6.08127	10.9121	20.8859	9.14221	-123.836	5.82798	21.1956	44.3764	6.80864	-145.42	4.55135	13.5081
PLEKHO1	Unrelated|ENSG00000023902.14	PLEKHO1	2114	Unknown	6.13385	7.75982	-112.14	4.64139	23.649	15.1556	4.75353	-120.284	3.29975	8.49712	7.30471	2.81059	-98.5229	2.0818	4.32453
CIART	Unrelated|ENSG00000159208.16	CIART	2011	Unknown	25.9038	2.82172	-108.614	1.98418	4.88284	54.5673	2.42244	-125.233	1.66164	4.46835	25.2543	1.64135	-106.678	1.02095	4.18352
MRPS21	Unrelated|ENSG00000266472.6	MRPS21	1462	Unknown	57.7885	9.85333	-144.953	8.07028	12.6477	60.9796	10.0592	-150.447	7.00712	17.8221	69.7843	7.19404	-154.219	5.19649	11.6863
PRPF3	Unrelated|ENSG00000117360.13	PRPF3	2414	Unknown	180.404	2.99532	-146.29	2.36146	4.09431	147.172	4.40323	-156.945	3.07687	7.7396	199.741	2.66117	-156.477	1.89267	4.48041
RPRD2	Host|ENSG00000163125.16	RPRD2	8186	Unknown	770.478	1.9077	-173.625	1.36819	3.14973	298.349	3.42688	-167.007	2.4923	5.48287	798.81	1.57326	-177.636	0.977827	4.02301
RPRD2.1	OtherIntrons|ENSG00000163125.16	RPRD2.1	81115	Unknown	208.499	1.32974	-150.819	0.619257	Inf	225.769	0.885466	-144.166	0.330488	-1.30356	364.281	0.670114	-149.801	0.165359	-0.32649
Pre||snoDB1531	Pre||snoDB1531	Pre||snoDB1531	12936	Unknown	17.9361	2.03112	-97.6207	1.23804	5.65132	22.1555	1.02647	-93.0571	0.439043	-3.03717	49.7698	0.613504	-100.83	0.122933	-0.205148
Post||snoDB1531	Post||snoDB1531	Post||snoDB1531	10010	Unknown	11.744	1.48555	-84.2905	0.740719	Inf	10.3878	1.38903	-91.3636	0.605609	-4.73095	132.682	0.143373	-95.1464	2.46545e-07	-2.46546e-07
TARS2	Unrelated|ENSG00000143374.18	TARS2	2727	Unknown	81.9647	6.29952	-138.425	5.31437	7.73302	61.4996	7.11572	-142.929	5.25026	11.0374	88.8684	5.75852	-154.199	4.11647	9.5799
ADAMTSL4	Unrelated|ENSG00000143382.16	ADAMTSL4	4319	Unknown	0.258127	20.3522	-53.8162	12.557	53.6685	1.11449	7.40489	-77.4517	5.36578	11.9438	0.274428	8.83431	-64.982	5.60202	20.8843
ENSG00000288880	Unrelated|ENSG00000288880.2	ENSG00000288880	1122	Unknown	4.47771	4.01825	-85.6665	2.50708	10.1155	2.37981	13.063	-78.0594	5.97925	-70.7153	4.26404	5.13438	-76.9348	3.11953	14.4991
SETDB1	Unrelated|ENSG00000143379.13	SETDB1	4437	Unknown	124.303	4.8565	-156.295	3.63636	7.30893	68.9422	3.11905	-136.611	2.34459	4.65752	163.169	2.65281	-158.343	1.96172	4.09567
ANXA9	Unrelated|ENSG00000143412.10	ANXA9	1551	Unknown	21.6158	22.8794	-155.37	15.4876	43.7687	3.36475	10.4356	-116.255	7.67732	16.287	5.97288	10.2435	-125.887	7.44938	16.3915
PRUNE1	Unrelated|ENSG00000143363.17	PRUNE1	3025	Unknown	137.167	3.39097	-140.774	2.73699	4.45562	97.6478	4.78998	-146.712	3.50304	7.57163	147.912	2.95961	-152.72	2.02226	5.51666
BNIPL	Unrelated|ENSG00000163141.20	BNIPL	3312	Unknown	6.42324	2.2942	-78.9	1.37256	6.98328	113.34	0.0903759	-69.2703	NA	NA	6.93937	2.51687	-79.0882	1.39206	13.11
C1orf56	Unrelated|ENSG00000143443.10	C1orf56	2085	Unknown	13.0795	5.66128	-104.58	4.30235	8.27503	8.4629	7.67873	-108.12	4.95097	17.1002	15.3436	3.69461	-112.513	2.48931	7.16273
MLLT11	Unrelated|ENSG00000213190.4	MLLT11	2483	Unknown	2.17612	5.37387	-73.5628	3.46755	11.9356	3.86906	4.547	-86.3777	2.78783	12.3231	1.45875	4.76785	-55.3259	3.15373	9.76644
GABPB2	Unrelated|ENSG00000143458.12	GABPB2	8807	Unknown	49.7074	3.78065	-131.172	2.72434	6.17483	34.2431	4.95833	-126.371	3.44064	8.87171	54.2687	3.35593	-135.153	2.24897	6.60886
SCNM1	Unrelated|ENSG00000163156.12	SCNM1	1913	Unknown	67.7998	3.98142	-125.416	3.28844	5.04444	83.3899	5.24515	-143.687	3.82206	8.3566	71.7218	3.87524	-140.559	2.80446	6.2687
PIP5K1A	Unrelated|ENSG00000143398.20	PIP5K1A	3800	Unknown	439.288	2.2989	-167.037	1.65977	3.73849	94.1113	2.55531	-137.02	1.83975	4.18177	528.952	1.85781	-171.676	1.27158	3.44696
PSMD4	Unrelated|ENSG00000159352.16	PSMD4	1333	Unknown	142.869	10.7712	-170.11	8.72731	14.0651	141.477	11.3072	-175.149	7.72364	21.0947	151.162	8.64664	-175.295	6.14207	14.6002
ZNF687	Unrelated|ENSG00000143373.18	ZNF687	4795	Unknown	546.006	2.22467	-165.933	1.69592	3.2325	346.246	4.76244	-170.384	3.53945	7.2768	519.592	2.33045	-174.563	1.56086	4.59701
PSMB4	Unrelated|ENSG00000159377.11	PSMB4	918	Unknown	173.494	15.125	-186.745	11.743	21.2428	183.897	11.2738	-185.82	7.89947	19.6806	175.743	10.3997	-188.075	7.44006	17.2693
CGN	Unrelated|ENSG00000143375.15	CGN	5101	Unknown	110.422	5.563	-151.573	4.38088	7.61884	68.5702	7.45499	-153.012	5.08334	13.9751	64.4175	4.6285	-145.926	3.11522	9.00087
TUFT1	Unrelated|ENSG00000143367.17	TUFT1	3107	Unknown	470.284	0.905585	-146.776	0.416867	Inf	307.75	2.32283	-163.128	1.61035	4.1661	501.315	0.937098	-154.97	0.3819	-2.06512
SNX27	Unrelated|ENSG00000143376.14	SNX27	7250	Unknown	141.44	7.22851	-169.195	5.40607	10.9045	132.992	6.07987	-168.208	4.27209	10.54	178.311	4.07505	-170.127	2.92159	6.73345
OAZ3	Unrelated|ENSG00000143450.19	OAZ3	3789	Unknown	1.68889	11.0874	-70.0425	8.54102	15.7973	4.05813	3.1694	-74.5724	2.31813	5.00867	2.15268	3.85715	-70.375	2.79329	6.22988
TDRKH-AS1	Unrelated|ENSG00000203288.6	TDRKH-AS1	1011	Unknown	4.65929	3.71306	-77.9443	2.54343	6.87428	5.63547	7.72902	-85.1367	4.91397	18.0951	5.60117	4.43151	-85.1839	2.81934	10.3498
CHTOP	Unrelated|ENSG00000160679.13	CHTOP	2250	Unknown	197.367	3.09851	-154.377	2.33232	4.61435	174.193	3.0255	-152.27	2.11877	5.28886	193.902	2.73349	-156.368	1.92437	4.71664
SNAPIN	Unrelated|ENSG00000143553.11	SNAPIN	1003	Unknown	30.9027	5.61764	-118.797	4.51708	7.42725	22.1936	5.38758	-114.054	3.94664	8.48578	29.6805	4.95099	-126.49	3.42394	8.93662
INTS3	Unrelated|ENSG00000143624.14	INTS3	5252	Unknown	59.6199	10.3941	-152.949	8.09562	14.5153	39.4044	8.10927	-140.836	6.06001	12.2526	54.3554	6.46215	-150.988	4.73654	10.1657
SLC27A3	Unrelated|ENSG00000143554.14	SLC27A3	3351	Unknown	10.882	13.6067	-108.914	11.3849	16.9062	5.65997	8.37777	-105.468	6.21815	12.8357	11.121	10.2475	-121.395	7.09289	18.456
CREB3L4	Host|ENSG00000143578.16	CREB3L4	1750	Unknown	24.243	9.10838	-125.005	7.30033	12.1069	10.9269	8.24671	-119.593	5.80852	14.2126	20.2547	7.60158	-126.91	5.07934	15.0996
Post||snoDB1154	Post||snoDB1154	Post||snoDB1154	3152	Unknown	29.1006	0.781838	-89.7502	0.20205	Inf	10.2566	1.35571	-83.021	0.725508	10.3205	14.505	0.916182	-76.2995	0.327221	-1.14539
RPS27	Unrelated|ENSG00000177954.14	RPS27	352	Unknown	74.5785	34.1792	-187.433	23.7212	61.1289	92.6126	40.6335	-189.715	20.9557	666.277	70.5122	24.5066	-187.021	15.8913	53.5238
UBAP2L	Host|ENSG00000143569.19	UBAP2L	3997	Unknown	157.905	9.9929	-181.837	7.28933	15.8843	190.082	5.76544	-175.144	4.23029	9.04941	183.263	4.76079	-177.576	3.52947	7.31157
UBAP2L.1	OtherIntrons|ENSG00000143569.19	UBAP2L.1	44144	Unknown	109.08	3.33344	-148.158	2.35147	5.72361	194.782	1.76015	-154.474	1.12378	4.05819	154.012	1.93779	-151.901	1.29579	3.84059
HAX1	Unrelated|ENSG00000143575.16	HAX1	1189	Unknown	70.8784	10.7661	-150.721	8.89351	13.6375	70.5543	9.43941	-151.363	6.73557	15.7699	72.3219	7.83567	-153.918	5.80758	12.0403
ATP8B2	Unrelated|ENSG00000143515.20	ATP8B2	5974	Unknown	72.2657	7.66532	-155.428	5.67591	11.8019	50.3284	6.54989	-150.534	4.46622	12.2781	63.1	6.0713	-156.807	3.77226	15.5459
IL6R	Unrelated|ENSG00000160712.13	IL6R	5764	Unknown	33.0344	2.26426	-104.541	1.63125	3.70008	25.0338	3.38882	-108.282	2.30336	6.40917	26.9482	1.94669	-101.557	1.37067	3.35777
CKS1B	Unrelated|ENSG00000173207.13	CKS1B	912	Unknown	33.4653	10.1306	-143.407	7.51366	15.5448	25.5146	5.57394	-124.313	4.14177	8.5201	34.6483	6.83998	-143.768	4.81886	11.7813
FLAD1	Unrelated|ENSG00000160688.19	FLAD1	2656	Unknown	76.8915	4.70836	-147.544	3.38937	7.70793	100.286	3.9461	-146	3.04135	5.6171	83.5673	3.2028	-142.792	2.42055	4.73206
ZBTB7B	Unrelated|ENSG00000160685.14	ZBTB7B	4017	Unknown	234.275	2.99797	-164.446	2.08208	5.35248	169.042	3.23519	-157.368	2.30012	5.45131	214.151	1.83192	-153.489	1.2986	3.10856
ADAM15	Unrelated|ENSG00000143537.14	ADAM15	2946	Unknown	39.099	26.7434	-162.29	20.1723	39.6639	25.8226	14.4932	-142.831	10.6661	22.6038	30.9334	12.3648	-155.408	9.16687	18.9895
EFNA4	Unrelated|ENSG00000243364.8	EFNA4	1254	Unknown	49.803	1.87774	-102.005	1.42546	2.75039	36.392	2.45965	-108.578	1.79616	3.90045	48.1897	1.51067	-108.959	0.988024	3.2072
ENSG00000251246	Unrelated|ENSG00000251246.1	ENSG00000251246	1042	Unknown	2.17434	5.82861	-70.0693	4.05339	10.3705	5.69789	1.96825	-78.809	1.13282	7.49764	3.49682	2.51678	-70.2056	1.54716	6.74222
EFNA3	Unrelated|ENSG00000143590.14	EFNA3	1817	Unknown	4.76363	4.7125	-80.1877	3.41701	7.59014	8.84246	2.57069	-89.2623	1.67439	5.53192	7.69086	1.9193	-79.495	1.23958	4.24951
EFNA1	Unrelated|ENSG00000169242.12	EFNA1	1552	Unknown	123.697	1.94384	-122.839	1.51106	2.724	133.652	1.6754	-135.985	1.12695	3.26383	123.367	1.73396	-135.229	1.18444	3.23468
SLC50A1	Unrelated|ENSG00000169241.19	SLC50A1	1298	Unknown	29.7734	13.5173	-140.447	10.6701	18.437	35.7254	11.6449	-139.037	7.90425	22.1067	32.539	9.02323	-144.732	6.08971	17.4099
MTX1	Unrelated|ENSG00000173171.15	MTX1	1636	Unknown	10.2136	14.6132	-120.809	11.0528	21.5574	12.1714	8.63548	-118.612	6.25247	13.9537	12.3967	7.3182	-120.111	5.2847	11.8954
MTX1P1	Unrelated|ENSG00000236675.1	MTX1P1	838	Unknown	2.40469	14.4288	-84.8546	11.023	20.8802	2.62409	8.55103	-83.3443	6.22872	13.6345	2.60071	6.88218	-87.1377	4.85982	11.7874
HCN3	Unrelated|ENSG00000143630.10	HCN3	3838	Unknown	5.29183	4.69454	-85.889	3.27251	8.30215	3.74069	11.5315	-88.887	6.01867	137.216	8.62022	2.57113	-89.8343	1.64908	5.83194
FDPS	Unrelated|ENSG00000160752.15	FDPS	1478	Unknown	38.019	17.2529	-158.657	12.5916	27.3939	25.1447	11.3551	-142.137	7.78198	20.9954	37.4982	9.48452	-156.128	6.74694	15.9605
RUSC1	Unrelated|ENSG00000160753.17	RUSC1	3847	Unknown	90.9349	9.0553	-158.109	7.16519	12.2999	85.3082	7.50899	-154.731	5.50092	11.826	92.5964	5.31095	-154.647	3.93631	8.16089
ASH1L-AS1	Unrelated|ENSG00000235919.5	ASH1L-AS1	1225	Unknown	3.82377	3.81862	-73.4912	2.63274	6.9484	4.52373	1.84415	-74.9686	1.16206	4.46499	9.37544	1.47637	-83.8687	0.785119	12.3481
MSTO1	Unrelated|ENSG00000125459.18	MSTO1	2438	Unknown	12.368	11.6348	-127.909	8.1124	20.5633	16.3767	5.89561	-119.696	4.29737	9.38659	14.4524	4.99256	-115.357	3.84313	7.12296
DAP3	Host|ENSG00000132676.16	DAP3	2056	Unknown	50.3738	13.971	-159.543	10.4256	21.1706	40.8836	9.39409	-153.638	6.5171	16.8188	42.6471	8.38096	-154.44	5.96179	14.1041
DAP3.1	OtherIntrons|ENSG00000132676.16	DAP3.1	47586	Unknown	209.822	1.09968	-140.148	0.510931	Inf	208.46	1.10279	-143.884	0.538014	-22.1675	229.494	0.87284	-142.082	0.34838	-1.72696
MSTO2P	Unrelated|ENSG00000203761.5	MSTO2P	1709	Unknown	5.22368	11.274	-107.814	7.73283	20.7982	6.58892	5.97714	-100.251	4.22145	10.233	6.36736	4.84983	-97.0014	3.61487	7.36644
LAMTOR2	Unrelated|ENSG00000116586.12	LAMTOR2	621	Unknown	7.48552	19.312	-114.223	15.1592	26.5987	9.99934	14.9644	-119.215	10.3271	27.1609	8.05561	12.7739	-121.727	8.88339	22.7273
RAB25	Unrelated|ENSG00000132698.15	RAB25	1100	Unknown	35.3068	12.9345	-136.094	10.8254	16.0642	34.1384	11.032	-134.134	7.94683	18.0326	38.6528	8.69362	-143.721	6.24764	14.2871
LMNA	Unrelated|ENSG00000160789.24	LMNA	3178	Unknown	206.693	9.71651	-172.158	8.13424	12.063	302.292	7.67491	-184.452	5.81795	11.273	202.463	7.4301	-176.745	5.33154	12.2531
SEMA4A	Unrelated|ENSG00000196189.14	SEMA4A	3249	Unknown	6.49628	12.7229	-110.297	9.30996	20.0865	7.91968	5.02068	-104.858	3.53529	8.65875	8.96786	6.9357	-109.267	4.89445	11.8977
SLC25A44	Unrelated|ENSG00000160785.14	SLC25A44	3662	Unknown	220.648	1.81164	-140.393	1.31462	2.91293	171.014	2.97574	-149.625	2.18871	4.6466	221.064	1.76514	-150.262	1.12605	4.08166
PMF1-BGLAP	Unrelated|ENSG00000260238.6	PMF1-BGLAP	1007	Unknown	8.9962	11.7912	-113.072	8.94753	17.2846	7.04687	10.313	-103.784	6.9797	19.7404	10.5126	8.26362	-118.614	5.38247	17.7821
PMF1	Unrelated|ENSG00000160783.19	PMF1	1068	Unknown	16.9289	12.2355	-125.664	9.58797	16.9029	12.4808	10.0291	-114.471	7.33764	15.8388	17.0585	9.12358	-130.211	6.25852	16.8265
TMEM79	Unrelated|ENSG00000163472.19	TMEM79	2191	Unknown	19.1285	3.52219	-98.7231	2.74406	4.9163	21.9487	3.59864	-116.597	2.76902	5.13805	21.0009	2.32661	-100.667	1.67573	3.80427
RHBG	Unrelated|ENSG00000132677.13	RHBG	1790	Unknown	1.00837	9.83795	-72.8967	6.03587	26.583	2.32822	4.72365	-77.2716	3.18645	9.12635	0.727325	2.46213	-54.5899	1.44658	8.26336
NAXE	Unrelated|ENSG00000163382.13	NAXE	3269	Unknown	34.0773	19.1253	-152.384	14.7465	27.2027	30.8073	12.5324	-151.094	8.71104	22.3265	32.7509	11.5272	-152.394	8.30499	18.835
METTL25B	Unrelated|ENSG00000143303.12	METTL25B	2271	Unknown	20.677	4.88301	-107.859	3.85534	6.65766	11.1897	9.23088	-103.947	6.53672	15.703	15.5048	7.24994	-114.971	4.64836	16.4651
PRCC	Unrelated|ENSG00000143294.15	PRCC	2068	Unknown	195.107	3.96348	-155.046	3.16326	5.3057	143.888	4.90496	-151.191	3.73437	7.14449	221.161	2.9474	-162.107	2.11619	4.85396
DUSP23	Unrelated|ENSG00000158716.9	DUSP23	797	Unknown	10.7559	8.75812	-99.741	7.28312	10.9823	15.3344	9.45658	-115.719	6.67129	16.2346	9.93838	7.72556	-104.896	5.677	12.0873
PEA15	Unrelated|ENSG00000162734.13	PEA15	2694	Unknown	70.8807	7.71157	-142.261	6.3985	9.70274	99.5777	9.81926	-161.387	6.6969	18.3964	77.5173	7.09992	-153.313	4.98011	12.3618
NCSTN	Unrelated|ENSG00000162736.18	NCSTN	2822	Unknown	47.4263	6.19633	-135.165	4.82431	8.6589	50.2524	10.0168	-141.575	6.77204	19.2311	54.0207	6.36108	-142.589	4.26129	12.5406
KLHDC9	Unrelated|ENSG00000162755.14	KLHDC9	1347	Unknown	3.19067	4.9881	-84.3239	3.05324	13.6179	2.999	10.4255	-81.0001	6.62617	24.4374	3.23117	7.56463	-77.0153	4.53622	22.7581
NIT1	Unrelated|ENSG00000158793.14	NIT1	2081	Unknown	9.63601	7.85072	-101.723	6.1631	10.8111	8.72495	5.98734	-91.0495	4.42577	9.25166	10.4677	7.01082	-112.399	4.31797	18.6279
UFC1	Unrelated|ENSG00000143222.12	UFC1	888	Unknown	12.2027	16.2319	-128.357	12.1053	24.6267	16.0515	12.3107	-133.002	7.98309	26.8848	11.9203	11.5264	-130.919	7.80286	22.0473
USP21	Unrelated|ENSG00000143258.17	USP21	2315	Unknown	30.7554	4.32315	-116.826	3.33471	6.14441	24.9048	4.47864	-112.516	3.42204	6.47917	33.9733	2.97529	-117.434	2.242	4.42141
PPOX	Unrelated|ENSG00000143224.18	PPOX	1733	Unknown	2.03707	9.16082	-81.6483	6.18423	17.6617	1.93549	11.128	-78.6516	6.90589	28.6345	2.87177	13.1132	-86.5763	7.57645	48.7078
NDUFS2	Unrelated|ENSG00000158864.13	NDUFS2	2265	Unknown	33.6669	12.606	-142.532	9.90132	17.3438	31.3528	11.363	-144.988	7.65473	22.0399	29.5499	10.1325	-143.795	6.89548	19.098
TOMM40L	Unrelated|ENSG00000158882.15	TOMM40L	2807	Unknown	16.3864	4.80065	-102.595	3.76537	6.6211	18.1201	5.08907	-114.374	3.73843	7.9677	20.6271	2.91227	-110.039	2.05701	4.9849
SDHC	Host|ENSG00000143252.16	SDHC	1308	Unknown	22.8017	17.5413	-143.103	13.2972	25.7645	18.1003	10.7569	-134.85	7.59837	18.4091	22.8822	11.6767	-140.68	8.06978	21.1139
SDHC.1	OtherIntrons|ENSG00000143252.16	SDHC.1	26168	Unknown	46.2134	0.982782	-98.8187	0.43342	Inf	87.6063	0.6838	-110.984	0.176903	-0.366569	60.1623	0.74605	-103.631	0.219535	-0.533532
Pre||snoDB1245	Pre||snoDB1245	Pre||snoDB1245	14566	Unknown	6.96235	2.28586	-80.926	1.36231	7.09754	204.233	0.0852249	-86.6548	NA	NA	20.6637	0.705023	-79.0277	0.175686	-0.350241
ENSG00000288670	Unrelated|ENSG00000288670.1	ENSG00000288670	1807	Unknown	2.18042	3.01844	-65.7398	1.70887	12.9181	2.35578	2.77449	-60.158	1.63927	9.02326	2.38729	2.87313	-68.214	1.67076	10.2487
FCRLB	Unrelated|ENSG00000162746.15	FCRLB	1996	Unknown	1.05197	6.65521	-57.8831	4.50701	12.7162	3.73662	1.99747	-69.482	1.34282	3.89764	0.879644	2.90172	-45.5856	2.14433	4.48632
DUSP12	Unrelated|ENSG00000081721.12	DUSP12	1330	Unknown	9.63388	6.44192	-102.785	4.77435	9.89961	11.8737	6.28873	-108.692	4.18979	12.6017	12.0954	4.24528	-108.606	2.90768	7.86192
ATF6	Unrelated|ENSG00000118217.7	ATF6	7470	Unknown	30.6496	8.04168	-131.316	6.24166	11.3007	19.8265	6.81299	-120.441	4.63649	12.8409	28.4105	5.96817	-131.86	3.9583	12.1245
NOS1AP	Unrelated|ENSG00000198929.13	NOS1AP	5559	Unknown	32.516	3.09679	-121.702	2.049	6.33764	25.1555	2.16575	-108.75	1.54004	3.6479	26.0283	1.85302	-105.489	1.34632	2.9713
ENSG00000254706	Unrelated|ENSG00000254706.3	ENSG00000254706	702	Unknown	4.54151	4.98445	-87.6232	3.29836	10.1971	5.83755	2.24103	-67.6802	1.73789	3.15419	5.19754	2.19415	-66.1887	1.63058	3.35302
C1orf226	Unrelated|ENSG00000239887.6	C1orf226	4122	Unknown	48.7925	3.19651	-133.716	2.07623	6.94249	38.2924	2.36933	-109.733	1.87529	3.21681	70.2396	1.19324	-113.104	0.74963	2.92294
UHMK1	Unrelated|ENSG00000152332.16	UHMK1	8524	Unknown	103.664	8.06511	-165.47	5.96171	12.4619	87.2324	7.05889	-160.142	4.72815	13.9215	106.611	7.19852	-167.778	4.73374	15.0183
UAP1	Unrelated|ENSG00000117143.14	UAP1	3559	Unknown	13.2231	10.7782	-127.096	7.58357	18.6235	17.3858	6.31075	-122.715	4.35989	11.4213	16.7587	5.18641	-123.236	3.58584	9.36784
HSD17B7	Unrelated|ENSG00000132196.16	HSD17B7	1528	Unknown	16.0274	2.84582	-94.2119	2.07729	4.51694	15.6573	4.31338	-108.939	3.11062	7.03264	17.2738	2.4164	-98.2337	1.57868	5.14838
NUF2	Unrelated|ENSG00000143228.13	NUF2	1964	Unknown	9.03942	4.29608	-95.991	3.01222	7.4873	3.92944	5.30186	-85.0438	3.29053	13.6382	10.9579	3.05522	-95.1167	2.11159	5.52365
PBX1	Unrelated|ENSG00000185630.20	PBX1	7087	Unknown	67.7468	6.75755	-149.787	5.05996	10.1693	18.589	7.97009	-126.073	4.77455	24.0997	47.8227	5.70455	-146.994	3.54452	14.6046
MGST3	Unrelated|ENSG00000143198.13	MGST3	1158	Unknown	3.6248	23.167	-106.512	16.9203	36.7251	4.08937	21.6692	-106.833	11.6704	151.275	3.50201	17.6134	-104.885	10.6379	51.1612
UCK2	Unrelated|ENSG00000143179.16	UCK2	4838	Unknown	86.2858	4.09073	-147.664	2.9097	6.88555	60.5801	4.47523	-133.858	3.39468	6.56488	93.2598	2.44847	-140.646	1.81632	3.75557
POGK	Unrelated|ENSG00000143157.12	POGK	6254	Unknown	330.749	2.68426	-161.812	2.02492	3.98027	259.32	3.4107	-166.456	2.51124	5.31402	378.364	2.02371	-167.597	1.41219	3.56934
POU2F1	Unrelated|ENSG00000143190.23	POU2F1	14038	Unknown	104.501	2.90515	-139.329	2.13395	4.5492	79.9545	2.67738	-134.479	1.85675	4.79793	144.752	1.65991	-141.128	1.08167	3.5665
MPZL1	Unrelated|ENSG00000197965.12	MPZL1	4978	Unknown	44.6343	10.1287	-150.298	7.51344	15.5367	33.1701	9.08853	-144.143	5.89415	19.8421	46.1074	6.38114	-148.66	4.39061	11.6733
DCAF6	Unrelated|ENSG00000143164.16	DCAF6	3522	Unknown	18.4585	11.9498	-133.717	8.77535	18.7227	12.8631	9.89872	-118.979	6.42569	21.542	15.5019	8.49725	-128.731	5.55452	18.0712
TIPRL	Unrelated|ENSG00000143155.13	TIPRL	2998	Unknown	23.4785	6.17502	-126.452	4.4076	10.3088	25.1988	8.49553	-133.323	5.17476	23.7124	25.418	5.7202	-128.352	3.68336	12.7964
SFT2D2	Unrelated|ENSG00000213064.10	SFT2D2	11040	Unknown	61.8727	8.84601	-153.399	6.67095	13.1256	68.7369	5.78125	-151.021	4.04803	10.11	69.0129	5.73936	-155.458	4.0501	9.84607
TBX19	Unrelated|ENSG00000143178.13	TBX19	2985	Unknown	4.86986	1.54664	-69.2164	0.705555	Inf	4.08532	2.16046	-65.2476	1.2693	7.25198	4.70442	2.15185	-71.8768	1.20134	10.3058
ATP1B1	Unrelated|ENSG00000143153.14	ATP1B1	4435	Unknown	87.5989	5.25634	-147.321	4.03749	7.52931	88.0347	5.13265	-152.791	3.65871	8.59537	113.482	4.60996	-158.136	2.97158	10.2752
BLZF1	Unrelated|ENSG00000117475.14	BLZF1	2524	Unknown	34.5578	3.82907	-122.395	2.77229	6.18781	24.288	5.45963	-117.476	3.46779	12.8275	40.05	2.98375	-126.127	1.96809	6.16561
C1orf112	Unrelated|ENSG00000000460.17	C1orf112	4355	Unknown	16.0798	9.42264	-133.626	6.21041	19.5181	11.9595	4.16251	-107.412	2.8896	7.43988	21.5202	3.8211	-128.719	2.73038	6.36294
GORAB	Unrelated|ENSG00000120370.14	GORAB	2540	Unknown	24.0518	1.86295	-96.6002	1.21608	3.98004	28.1971	2.24618	-104.579	1.43965	5.10765	34.5967	1.42452	-99.8216	0.837659	4.75783
FMO4	Unrelated|ENSG00000076258.10	FMO4	2303	Unknown	1.16682	7.17442	-67.7386	4.48192	17.9696	0.888481	6.17418	-61.7313	3.45734	28.8272	1.0039	6.4104	-59.1921	3.53201	34.6396
PRRC2C	Unrelated|ENSG00000117523.18	PRRC2C	10624	Unknown	541.445	5.0862	-191.423	3.86093	7.4507	417.336	4.81942	-190.546	3.2502	9.31841	584.934	3.35011	-191.751	2.39934	5.54894
METTL13	Unrelated|ENSG00000010165.20	METTL13	3368	Unknown	159.24	3.62076	-150.157	2.82672	5.03517	145.602	3.55164	-151.749	2.7581	4.98626	148.6	2.64527	-151.632	1.92101	4.24614
SUCO	Unrelated|ENSG00000094975.14	SUCO	5916	Unknown	102.805	3.74958	-145.53	2.78926	5.71841	83.8454	5.14139	-147.656	3.44163	10.1585	110.123	2.84725	-146.625	1.86505	6.01488
PRDX6	Unrelated|ENSG00000117592.9	PRDX6	1690	Unknown	101.513	16.6567	-180.291	12.3372	25.6304	87.174	12.8412	-175.473	8.34978	27.7889	94.6307	11.2359	-179.725	7.47224	22.639
KLHL20	Unrelated|ENSG00000076321.11	KLHL20	3414	Unknown	48.4556	2.35874	-111.32	1.77481	3.51529	35.9013	2.98094	-119.095	1.991	5.92885	58.8283	1.84566	-117.607	1.23001	3.69513
DARS2	Unrelated|ENSG00000117593.12	DARS2	3820	Unknown	41.5395	13.9672	-155.219	10.3881	21.3089	32.2061	8.54567	-151.742	5.92095	15.3504	36.6188	8.20901	-151.099	5.77008	14.2193
ZBTB37	Unrelated|ENSG00000185278.16	ZBTB37	19183	Unknown	86.1833	2.64991	-133.759	1.89881	4.3841	55.3933	2.20132	-122.572	1.42147	4.87685	108.673	2.71128	-145.226	1.83263	5.20846
RABGAP1L	Unrelated|ENSG00000152061.24	RABGAP1L	8634	Unknown	15.3684	5.82909	-112.901	4.25752	9.23975	8.65577	7.19807	-103.498	4.29399	22.2378	17.6982	4.88243	-115.513	3.159	10.7438
CACYBP	Unrelated|ENSG00000116161.18	CACYBP	2869	Unknown	72.833	9.75449	-161.998	7.17154	15.2454	99.5581	8.15318	-167.487	5.45773	16.109	85.9909	6.36904	-161.979	4.39348	11.5729
BRINP2	Unrelated|ENSG00000198797.7	BRINP2	4097	Unknown	3.17022	8.82434	-108.61	4.44078	684.807	13.4024	1.41506	-103.185	0.960703	2.68483	5.69334	1.16255	-81.2421	0.853646	1.82181
RASAL2	Unrelated|ENSG00000075391.18	RASAL2	14453	Unknown	33.9226	3.45789	-117.935	2.53482	5.43829	10.9773	5.71112	-105.201	3.40046	17.8203	34.5732	2.74439	-120.815	1.7843	5.94119
C1orf220	Unrelated|ENSG00000213057.5	C1orf220	2577	Unknown	3.21193	2.78498	-64.4287	1.79663	6.19041	4.22266	2.78962	-76.8122	1.5805	11.8721	8.97769	1.04552	-71.1633	0.502813	-13.176
RALGPS2	Unrelated|ENSG00000116191.19	RALGPS2	7492	Unknown	27.8966	6.1692	-130.769	4.39291	10.3571	13.9654	6.0379	-114.536	3.6986	16.429	23.4342	4.15536	-126.179	2.69406	9.08105
FAM20B	Unrelated|ENSG00000116199.12	FAM20B	5991	Unknown	110.128	6.55704	-157.771	5.0567	9.32331	97.6344	7.25895	-161.556	4.96114	13.5217	115.434	4.21082	-159.116	2.90242	7.6671
TOR3A	Unrelated|ENSG00000186283.14	TOR3A	2031	Unknown	104.563	5.61236	-150.011	4.43805	7.63171	170.617	4.69303	-160.647	3.55844	6.88983	125.571	3.57333	-153.62	2.65381	5.46794
SOAT1	Unrelated|ENSG00000057252.13	SOAT1	6861	Unknown	32.4587	7.49533	-133.734	5.66451	11.0748	33.946	8.10298	-140.724	5.2141	18.1702	45.1299	5.21971	-139.336	3.44649	10.7512
TDRD5	Unrelated|ENSG00000162782.16	TDRD5	3745	Unknown	11.0031	5.29963	-109.191	3.56487	10.3232	3.47915	12.8971	-93.1522	6.35961	-461.07	8.44706	7.74301	-112.557	3.90957	397.657
TOR1AIP1	Unrelated|ENSG00000143337.19	TOR1AIP1	3807	Unknown	135.958	4.14127	-154.803	3.0857	6.29455	77.0794	7.11285	-149.29	4.58374	15.8683	156.164	3.69808	-159.225	2.47194	7.33783
CEP350	Unrelated|ENSG00000135837.16	CEP350	13414	Unknown	288.911	2.69585	-164.327	1.91007	4.57996	181.488	4.99803	-168.477	3.10636	12.7817	372.819	2.2192	-170.765	1.37066	5.82593
QSOX1	Unrelated|ENSG00000116260.17	QSOX1	9276	Unknown	111.887	12.8595	-159.908	11.0225	15.4312	75.6055	14.5376	-154.667	10.1281	25.7476	91.2649	11.295	-165.03	7.46097	23.2347
LHX4	Unrelated|ENSG00000121454.6	LHX4	5844	Unknown	9.73224	2.1704	-96.1663	1.08818	396.189	3.17318	1.40418	-55.3035	0.749938	11.0037	72.061	0.126114	-79.4711	NA	NA
XPR1	Unrelated|ENSG00000143324.14	XPR1	8484	Unknown	51.8247	7.53168	-145.076	5.69213	11.1279	40.7986	7.59502	-138.328	5.03131	15.4858	54.5951	4.68386	-144.249	3.15841	9.05931
KIAA1614	Unrelated|ENSG00000135835.12	KIAA1614	9946	Unknown	1025.92	0.011317	-77.1845	NA	NA	5.36359	4.89861	-78.6129	2.99965	13.35	1.77716	4.84612	-65.5615	2.37568	-121.508
MR1	Unrelated|ENSG00000153029.16	MR1	7911	Unknown	21.7285	4.59809	-114.848	3.37702	7.20229	38.6749	4.55518	-127.384	3.29897	7.3564	25.2321	4.13577	-118.271	2.82552	7.71199
NPL	Unrelated|ENSG00000135838.14	NPL	3027	Unknown	1.14489	6.61991	-61.5481	4.37552	13.5916	2.55331	6.59723	-78.8659	4.27309	14.4644	0.962244	8.49516	-75.2039	4.75906	39.5216
DHX9	Unrelated|ENSG00000135829.17	DHX9	4493	Unknown	182.134	12.1558	-188.958	8.93304	19.0162	138.394	7.54527	-176.221	5.1218	14.322	177.44	7.32783	-184.896	5.2215	12.2826
LAMC1	Unrelated|ENSG00000135862.6	LAMC1	7929	Unknown	102.884	11.2494	-170.295	8.55621	16.4167	118.896	8.54808	-175.655	5.89054	15.5747	90.9709	9.39479	-169.235	6.01447	21.4508
LAMC2	Unrelated|ENSG00000058085.15	LAMC2	5398	Unknown	5.54677	7.42725	-91.6069	5.58447	11.0852	16.2553	7.30083	-112.863	5.08946	12.9104	4.67263	8.40128	-96.017	5.07977	24.2721
SMG7	Unrelated|ENSG00000116698.22	SMG7	6204	Unknown	248.566	8.20017	-178.895	6.54333	10.9806	188.419	8.40503	-178.522	5.5708	17.11	256.947	5.79015	-183.358	4.07912	9.97374
RGL1	Unrelated|ENSG00000143344.16	RGL1	5100	Unknown	4.37138	1.32882	-66.6985	0.502248	Inf	4.61673	2.19927	-67.347	1.29232	7.37529	3.91677	1.43372	-65.4425	0.692348	-20.2496
TSEN15	Unrelated|ENSG00000198860.14	TSEN15	2368	Unknown	20.7415	9.32443	-130.651	6.86677	14.5219	15.9623	8.14845	-124.723	5.27336	17.9169	18.0641	7.05554	-131.094	4.67869	14.341
C1orf21	Unrelated|ENSG00000116667.15	C1orf21	10293	Unknown	6.94264	8.57077	-102.618	6.29541	13.4218	4.94921	9.43995	-97.6835	5.7324	26.7248	8.8681	4.74398	-103.017	3.25902	8.71485
RNF2	Unrelated|ENSG00000121481.11	RNF2	3407	Unknown	34.3928	3.68553	-118.453	2.75065	5.58311	25.778	4.78956	-116.726	3.29818	8.74295	26.9881	3.03388	-118.509	2.05403	5.80132
SWT1	Unrelated|ENSG00000116668.13	SWT1	3838	Unknown	4.54868	4.17807	-86.5019	2.63099	10.1414	5.22774	3.96499	-82.2224	2.50208	9.54673	3.63178	8.92829	-87.6831	4.49039	763.728
HMCN1	Unrelated|ENSG00000143341.12	HMCN1	18368	Unknown	116.524	16.6627	-193.273	10.9356	34.9844	130.54	6.99076	-170.638	4.76974	13.0827	85.5074	5.26712	-173.867	3.81552	8.50145
PRG4	Unrelated|ENSG00000116690.13	PRG4	5049	Unknown	0.726982	57.9233	-101.315	27.7763	Inf	0.317794	23.1564	-78.3528	12.474	161.221	0.565171	19.8984	-90.8109	11.5956	70.0724
ODR4	Unrelated|ENSG00000157181.16	ODR4	3820	Unknown	30.931	4.43587	-123.63	3.21316	7.1608	27.2394	7.21221	-131.184	4.50229	18.1165	31.8775	4.18189	-127.662	2.83458	7.97026
RO60	Unrelated|ENSG00000116747.13	RO60	8291	Unknown	86.5304	4.57212	-148.549	3.33248	7.28029	38.1243	8.73831	-136.639	5.07059	31.5841	101.321	3.50852	-152.524	2.32035	7.19055
CDC73	Unrelated|ENSG00000134371.14	CDC73	5869	Unknown	82.9551	4.64123	-145.175	3.48498	6.94565	22.3101	4.60663	-117.757	3.04477	9.45854	87.0738	3.47131	-147.174	2.47059	5.83463
C1orf53	Unrelated|ENSG00000203724.11	C1orf53	600	Unknown	0.622485	10.7101	-64.2361	6.46762	31.1309	0.826994	18.7201	-61.7559	10.182	115.945	0.51888	16.7528	-66.3241	8.23117	-474.701
NEK7	Unrelated|ENSG00000151414.15	NEK7	4114	Unknown	76.5529	3.84287	-140.835	2.80608	6.09479	74.6144	5.34871	-143.967	3.6066	10.3464	78.982	3.50872	-142.806	2.34284	6.98447
NR5A2	Unrelated|ENSG00000116833.14	NR5A2	4969	Unknown	6.34034	8.41754	-122.234	4.4013	96.2129	6.36662	2.22741	-97.01	1.60292	3.64906	5.32591	1.42152	-93.1576	0.994685	2.49002
CAMSAP2	Unrelated|ENSG00000118200.15	CAMSAP2	8017	Unknown	222.993	2.90454	-156.716	2.15215	4.46577	146.664	5.00056	-162.75	3.29321	10.3842	200.191	2.51198	-158.394	1.68151	4.96321
INAVA	Unrelated|ENSG00000163362.11	INAVA	4298	Unknown	15.9036	3.10414	-111.956	1.83195	10.159	23.6133	2.03569	-105.318	1.68574	2.569	23.3861	1.48452	-94.7919	1.11952	2.20268
PKP1	Unrelated|ENSG00000081277.13	PKP1	5447	Unknown	27.4043	13.8904	-150.371	9.72292	24.3107	9.68766	6.31752	-122.918	4.8416	9.08791	18.3262	5.5086	-131.835	4.16239	8.14186
RPS10P7	Unrelated|ENSG00000223396.4	RPS10P7	2329	Unknown	2.37845	9.49074	-72.6265	7.45294	13.0623	2.88335	5.68017	-66.9728	4.09091	9.28866	1.97615	12.8673	-75.1558	7.47538	46.1666
NAV1	Unrelated|ENSG00000134369.16	NAV1	13891	Unknown	3.79272	9.04958	-93.9495	6.2983	16.0689	2.48437	3.05256	-83.6779	2.33205	4.41734	3.23022	3.66165	-88.024	2.54016	6.55622
IPO9	Unrelated|ENSG00000198700.10	IPO9	11416	Unknown	62.4963	12.8821	-163.146	9.60689	19.5455	50.3521	7.9626	-153.465	5.69935	13.2073	68.7224	6.67322	-157.768	4.85337	10.6766
SHISA4	Unrelated|ENSG00000198892.7	SHISA4	1432	Unknown	2.03043	18.3613	-80.6638	14.5985	24.7375	4.56352	11.1521	-101.221	7.68086	20.3478	2.8765	10.972	-88.9995	7.05468	24.6717
TIMM17A	Unrelated|ENSG00000134375.11	TIMM17A	1650	Unknown	23.2792	6.87108	-127.257	4.99511	11.0036	20.8459	6.5757	-128.869	4.4199	12.8369	31.0433	3.82452	-130.297	2.66232	6.7875
RNPEP	Unrelated|ENSG00000176393.11	RNPEP	2399	Unknown	47.5332	16.8589	-156.899	13.1743	23.405	51.325	11.1385	-159.216	7.77042	19.66	48.7315	11.6176	-158.995	8.39137	18.8742
ELF3	Unrelated|ENSG00000163435.16	ELF3	4994	Unknown	291.251	3.01498	-177.955	1.86515	7.86135	370.457	1.22466	-152.156	0.847439	2.20714	378.414	1.33442	-160.293	0.935373	2.32727
ENSG00000249007	Unrelated|ENSG00000249007.1	ENSG00000249007	987	Unknown	58.7695	2.83362	-138.689	1.71985	8.04087	77.1343	1.18636	-112.43	0.819512	2.1478	79.7396	1.32246	-123.938	0.88666	2.60076
GPR37L1	Unrelated|ENSG00000170075.10	GPR37L1	6529	Unknown	7.16826	11.5013	-117.99	7.66375	23.0368	8.89642	4.2084	-109.387	3.11996	6.46316	10.7823	3.80038	-110.779	2.68944	6.47507
PPP1R12B	Unrelated|ENSG00000077157.22	PPP1R12B	15431	Unknown	89.0382	3.85374	-138.458	2.99482	5.40346	61.5674	4.68981	-138.683	3.10308	9.59728	77.92	3.03524	-137.553	2.07759	5.63069
PCAT6	Unrelated|ENSG00000228288.9	PCAT6	836	Unknown	0.915294	11.6918	-62.3958	8.46569	18.8907	1.87297	5.29353	-67.9359	3.90777	8.20217	0.927198	8.56007	-67.0445	5.20781	24.0249
ACTG1P25	Unrelated|ENSG00000234996.4	ACTG1P25	2321	Unknown	8.28366	2.88099	-87.2321	1.88775	6.07995	6.87907	3.37708	-81.605	2.23014	6.95286	8.72575	2.4047	-82.8353	1.51689	5.79851
TMEM183A	Unrelated|ENSG00000163444.12	TMEM183A	3031	Unknown	77.3837	15.8037	-170.902	11.9477	23.3349	115.354	9.25312	-172.423	6.71449	14.8783	73.7604	8.9056	-165.975	6.47975	14.2347
PPFIA4	Unrelated|ENSG00000143847.16	PPFIA4	6614	Unknown	3.68745	6.37799	-89.6315	4.16099	13.6517	9.61056	4.87286	-95.2521	3.35155	8.92328	4.62269	7.05456	-89.6795	4.03819	27.8793
BTG2	Unrelated|ENSG00000159388.6	BTG2	2729	Unknown	315.672	2.12467	-165.697	1.34843	5.0071	2540.94	0.519762	-182.224	0.0529648	-0.0665223	697.87	1.13226	-164.786	0.656816	4.10029
ATP2B4	Host|ENSG00000058668.15	ATP2B4	8918	Unknown	31.7245	9.51514	-137.28	7.30578	13.6401	31.0176	7.15817	-136.688	4.77997	14.2461	28.3267	6.93652	-138.179	4.62752	13.8445
ATP2B4.1	OtherIntrons|ENSG00000058668.15	ATP2B4.1	102724	Unknown	25.8123	2.69818	-114.871	1.70159	6.51232	107.993	0.736335	-124.07	0.228583	-0.602912	35.3405	1.44754	-112.087	0.890461	3.86644
Pre|SNORA77|snoDB0045	Pre|SNORA77|snoDB0045	Pre|SNORA77|snoDB0045	2009	Unknown	0.680213	6.68605	-53.3191	4.16138	16.9994	2.85718	7.85717	-80.0188	5.10849	17.0091	1.30171	4.2826	-56.5288	2.62693	11.583
ZBED6	Unrelated|ENSG00000257315.4	ZBED6	11697	Unknown	486.016	3.30079	-175.218	2.55279	4.66881	408.639	3.70739	-178.763	2.55221	6.773	596.869	2.86903	-185.915	1.99161	5.12844
ZC3H11A	Unrelated|ENSG00000058673.17	ZC3H11A	11825	Unknown	482.951	3.32389	-174.882	2.58021	4.66986	409.417	3.70751	-178.805	2.55746	6.73707	590.044	2.86821	-185.825	1.99013	5.13294
SNRPE	Unrelated|ENSG00000182004.13	SNRPE	1560	Unknown	24.7221	15.2705	-149.107	10.768	26.2439	23.0539	11.0496	-138.371	7.25295	23.1876	23.405	9.65442	-149.068	6.45305	19.1594
SOX13	Unrelated|ENSG00000143842.15	SOX13	4076	Unknown	160.879	2.48252	-143.782	1.833	3.84499	108.258	2.46462	-136.192	1.74471	4.19601	195.693	1.60873	-143.178	1.08157	3.1384
MDM4	Unrelated|ENSG00000198625.14	MDM4	10050	Unknown	289.807	3.37836	-170.624	2.4233	5.57593	255.986	2.5958	-162.243	1.73577	5.14497	322.279	2.64528	-174.113	1.84515	4.67069
TMCC2	Unrelated|ENSG00000133069.17	TMCC2	3968	Unknown	3.17492	2.87521	-59.0482	2.01711	5.00396	2.64445	19.6445	-75.279	9.34451	-192.128	8.33296	1.67922	-73.0404	0.904067	11.7767
CDK18	Unrelated|ENSG00000117266.16	CDK18	3141	Unknown	11.9204	15.7172	-129.207	11.4703	24.9583	11.1884	7.47437	-121.052	5.4412	11.9334	13.3177	7.02132	-123.379	5.05957	11.4677
ENSG00000286619	Unrelated|ENSG00000286619.1	ENSG00000286619	3014	Unknown	8.45938	6.12146	-104.695	4.21157	11.2009	10.8793	7.32562	-109.771	4.43238	21.096	6.97374	6.64775	-99.7711	4.15771	16.5737
SRGAP2	Host|ENSG00000266028.8	SRGAP2	6884	Unknown	175.213	4.239	-154.767	3.36879	5.71538	32.0289	12.6106	-129.376	7.34009	44.7263	142.272	3.24579	-155.862	2.16023	6.52453
SRGAP2.1	OtherIntrons|ENSG00000266028.8	SRGAP2.1	213007	Unknown	519.753	1.46874	-165.769	0.867458	4.78654	325.655	1.22494	-154.377	0.65834	8.79058	730.826	0.869584	-165.092	0.342324	-1.60963
Pre||snoDB1286	Pre||snoDB1286	Pre||snoDB1286	2702	Unknown	12.6594	0.824033	-75.5651	0.204207	Inf	1.5871	2.31178	-55.4304	1.10348	-24.3377	4737.26	0.00180459	-69.9029	NA	NA
snoDB1286	snoDB1286	snoDB1286	137	Unknown	0.126978	69.3147	-67.1459	28.3029	Inf	0.145325	69.3147	-78.3958	13.3489	-21.7115	0.208051	20.7943	-66.3558	10.8576	245.193
Post||snoDB1286	Post||snoDB1286	Post||snoDB1286	38166	Unknown	86.4596	1.23025	-120.665	0.633973	20.6901	21.8142	1.78882	-98.5573	0.996935	8.69713	1725.9	0.0522992	-118.264	NA	NA
IKBKE	Unrelated|ENSG00000263528.8	IKBKE	3240	Unknown	5.44624	13.1026	-112.134	8.97227	24.2794	9.32467	4.2577	-104.874	3.23145	6.23912	7.85652	3.68912	-99.8934	2.80229	5.3971
RASSF5	Unrelated|ENSG00000266094.8	RASSF5	5586	Unknown	2.63341	4.98488	-66.652	3.64412	7.88652	4.87752	2.80199	-71.5934	1.88038	5.49534	4.03827	2.47703	-80.1071	1.52603	6.5736
DYRK3	Unrelated|ENSG00000143479.18	DYRK3	8128	Unknown	8.51185	1.79566	-80.6985	0.982368	10.4329	7.20614	6.19396	-96.1661	3.48337	27.9198	14.5538	2.17654	-89.4614	1.30122	6.64985
MAPKAPK2	Unrelated|ENSG00000162889.11	MAPKAPK2	3091	Unknown	185.816	6.66712	-165.473	5.3839	8.75348	337.584	5.31853	-183.505	4.03158	7.81234	228.611	4.07824	-170.908	3.03783	6.20246
PFKFB2	Unrelated|ENSG00000123836.15	PFKFB2	7073	Unknown	14.8873	8.91485	-120.232	6.6647	13.4588	48.7123	3.53394	-131.655	2.41038	6.61955	19.7553	6.57261	-124.592	4.67456	11.0657
CD55	Unrelated|ENSG00000196352.18	CD55	2651	Unknown	26.5706	8.90282	-130.429	6.90297	12.534	20.7023	8.0436	-137.64	5.45098	15.3394	25.3025	6.26975	-133.901	4.29478	11.6075
CD46	Unrelated|ENSG00000117335.21	CD46	3371	Unknown	59.9109	7.68285	-150.034	5.74677	11.5862	34.3123	10.5624	-138.504	6.55775	27.1294	56.0703	6.6718	-151.215	4.33058	14.5236
UTP25	Unrelated|ENSG00000117597.18	UTP25	8481	Unknown	85.3628	1.61313	-127.107	0.949827	5.34754	73.0641	2.27565	-128.574	1.58581	4.02778	81.539	1.66002	-131.623	1.04963	3.9668
SERTAD4	Unrelated|ENSG00000082497.12	SERTAD4	5222	Unknown	36.9446	0.9768	-97.8338	0.382957	Inf	3.03007	4.31209	-72.6614	2.44913	18.0165	14.1025	2.35753	-95.4475	1.33042	10.3412
HHAT	Unrelated|ENSG00000054392.13	HHAT	3639	Unknown	1.20881	7.30486	-69.3616	4.53931	18.6942	0.763995	14.4243	-50.4312	7.73169	107.327	1.15481	10.0833	-69.9217	4.87324	-145.898
RCOR3	Host|ENSG00000117625.14	RCOR3	4474	Unknown	26.5695	3.69632	-116.171	2.64283	6.14644	22.3137	3.66049	-116.498	2.48243	6.96653	36.3446	1.97706	-114.502	1.34106	3.76051
RCOR3.1	OtherIntrons|ENSG00000117625.14	RCOR3.1	44459	Unknown	45.5739	2.23744	-121.308	1.41923	5.28337	50.7791	1.57759	-121.72	0.904021	6.18863	68.5273	1.27329	-125.844	0.646394	42.2139
Post||snoDB1556	Post||snoDB1556	Post||snoDB1556	5090	Unknown	7.09676	1.97414	-81.039	1.06606	13.3209	6.659	1.62227	-74.9654	0.852852	16.5823	11.9237	0.974639	-87.3013	0.361402	-1.39868
TRAF5	Unrelated|ENSG00000082512.15	TRAF5	3976	Unknown	10.4362	5.04877	-107.775	3.34721	10.2691	12.7983	2.68669	-101.927	1.79076	5.37664	10.598	2.52075	-107.249	1.65241	5.3124
LINC00467	Unrelated|ENSG00000153363.15	LINC00467	3536	Unknown	8.48954	4.15298	-92.4015	2.95456	6.98706	3.74538	7.07754	-82.4115	4.44927	17.2927	10.048	4.49689	-93.2224	3.13827	7.92989
DTL	Unrelated|ENSG00000143476.18	DTL	4471	Unknown	83.5038	2.26709	-147.757	1.17621	31.2501	20.6919	2.37426	-110.892	1.61121	4.51033	85.6759	1.74794	-141.093	1.04137	5.43687
PPP2R5A	Host|ENSG00000066027.12	PPP2R5A	3245	Unknown	32.0802	7.60035	-134.952	5.67496	11.5031	24.5445	8.34475	-129.887	5.54417	16.8628	25.6918	6.18186	-131.246	4.04208	13.1355
PPP2R5A.1	OtherIntrons|ENSG00000066027.12	PPP2R5A.1	65816	Unknown	68.4337	1.35346	-123.482	0.651829	Inf	116.199	0.820154	-126.41	0.265415	-0.752382	89.4442	1.05904	-121.886	0.504426	-10.6436
Pre|SNORA16B|snoDB0027	Pre|SNORA16B|snoDB0027	Pre|SNORA16B|snoDB0027	3573	Unknown	5.90908	1.07761	-62.549	0.398948	Inf	102.061	0.0565959	-62.8141	NA	NA	3.30966	1.33747	-60.8974	0.539035	-2.77932
Post|SNORA16B|snoDB0027	Post|SNORA16B|snoDB0027	Post|SNORA16B|snoDB0027	3675	Unknown	2.62876	2.13196	-66.8264	1.00724	Inf	5.58739	1.22266	-61.4767	0.538446	-4.51634	4.89193	1.05265	-55.7727	0.501148	-10.476
NENF	Unrelated|ENSG00000117691.10	NENF	916	Unknown	7.85636	20.1251	-117.487	15.5825	28.4058	10.3021	16.8879	-125.308	10.6358	40.973	6.20066	17.9917	-118.536	12.0322	35.6485
ATF3	Unrelated|ENSG00000162772.17	ATF3	2031	Unknown	28.1238	2.20906	-116.418	1.24241	9.9528	1167.3	0.13354	-136.245	NA	NA	374.905	0.1438	-115.802	NA	NA
TATDN3	Unrelated|ENSG00000203705.11	TATDN3	2527	Unknown	2.28174	9.69146	-80.524	6.98189	15.8379	1.53865	9.66272	-78.372	5.24544	61.202	3.29108	6.90212	-87.9444	4.50678	14.7323
FLVCR1	Unrelated|ENSG00000162769.13	FLVCR1	5919	Unknown	18.4146	4.24137	-105.632	3.22033	6.21044	21.0328	4.42524	-111.319	3.12225	7.59468	21.3839	3.13328	-108.466	2.22113	5.31668
VASH2	Unrelated|ENSG00000143494.16	VASH2	4473	Unknown	2.29151	5.29042	-77.0854	3.27734	13.7144	3.28904	2.44752	-76.1787	1.53656	6.01153	2.58467	2.06185	-70.2753	1.32131	4.69084
RPS6KC1	Unrelated|ENSG00000136643.12	RPS6KC1	5505	Unknown	18.0175	5.30224	-110.494	4.03644	7.72461	11.3532	8.2517	-106.412	5.45245	16.9576	19.8962	4.00146	-117.118	2.67925	7.90019
SMYD2	Unrelated|ENSG00000143499.14	SMYD2	1745	Unknown	7.37925	19.6207	-126.644	13.4231	36.4504	5.84276	11.1342	-118.958	7.33428	23.1046	5.47902	9.53024	-115.556	6.66709	16.7034
CENPF	Unrelated|ENSG00000117724.14	CENPF	10290	Unknown	152.498	2.85621	-150.542	2.03367	4.796	56.2457	3.89612	-140.414	2.58283	7.92655	145.156	2.47491	-149.99	1.60132	5.44588
KCTD3	Unrelated|ENSG00000136636.13	KCTD3	4019	Unknown	55.5098	6.89111	-146.111	5.12555	10.5121	43.9959	5.83822	-144.131	4.13693	9.9162	59.2019	4.13379	-144.846	2.95168	6.89526
SPATA17	Unrelated|ENSG00000162814.11	SPATA17	5798	Unknown	1.61318	6.71808	-70.8651	4.39428	14.2582	0.777176	7.3293	-70.0252	4.4498	20.7693	1.41907	7.08831	-73.3645	3.71527	76.9501
RRP15	Unrelated|ENSG00000067533.6	RRP15	7765	Unknown	33.5489	4.94896	-129.372	3.54237	8.20824	46.4254	4.21531	-130.858	3.06475	6.74904	30.424	3.21017	-124.018	2.28658	5.38546
TGFB2	Unrelated|ENSG00000092969.12	TGFB2	5868	Unknown	11.1284	4.41064	-110.025	2.75027	11.1299	17.7366	2.30372	-119.031	1.6774	3.67646	22.6359	1.83237	-118.594	1.21803	3.69703
LYPLAL1	Unrelated|ENSG00000143353.12	LYPLAL1	1857	Unknown	4.26896	8.31798	-95.2896	5.75165	15.0196	2.1939	7.49111	-80.3531	4.19494	34.9646	4.5024	4.70475	-88.1687	2.84041	13.6911
IARS2	Host|ENSG00000067704.10	IARS2	3530	Unknown	68.7099	12.1928	-165.167	9.00563	18.8718	39.0683	9.04367	-155.916	5.93851	18.9549	68.2628	9.02218	-167.39	5.86595	19.5311
IARS2.1	OtherIntrons|ENSG00000067704.10	IARS2.1	49374	Unknown	57.9083	1.23081	-109.853	0.649725	11.6509	65.434	1.14507	-116.082	0.577739	63.5882	67.4631	1.16572	-117.427	0.58028	-130.989
C1orf115	Unrelated|ENSG00000162817.7	C1orf115	2891	Unknown	19.0636	4.77329	-116.512	3.35053	8.29615	28.2708	8.19604	-133.649	5.00577	22.5985	18.445	6.39626	-120.439	3.86034	18.6434
MTARC2	Unrelated|ENSG00000117791.16	MTARC2	2146	Unknown	5.29978	10.4464	-94.8705	8.14423	14.5631	4.26927	9.51124	-98.1087	6.49873	17.7301	5.0197	7.85826	-98.3488	5.44609	14.1061
MTARC1	Unrelated|ENSG00000186205.14	MTARC1	7287	Unknown	19.6759	8.71396	-124.94	6.61175	12.7761	10.0729	9.34025	-110.678	6.27956	18.2216	15.6189	7.43736	-124.017	4.84515	15.9947
ENSG00000286231	Unrelated|ENSG00000286231.1	ENSG00000286231	1516	Unknown	7.14174	10.3022	-107.326	7.59114	16.0255	4.45638	11.282	-92.3249	7.11106	27.2867	7.22908	8.21649	-106.18	5.28398	18.4632
MIA3	Unrelated|ENSG00000154305.18	MIA3	8126	Unknown	63.0104	4.38581	-141.321	3.14341	7.25214	71.735	6.72299	-153.229	4.40581	14.1817	66.178	4.9313	-145.918	3.14447	11.4216
BROX	Unrelated|ENSG00000162819.12	BROX	4104	Unknown	31.7111	8.78659	-139.942	6.43423	13.8503	30.0066	8.15548	-139.497	5.27911	17.9186	30.294	7.68947	-140.711	4.95942	17.1059
DISP1	Unrelated|ENSG00000154309.9	DISP1	4844	Unknown	29.0767	1.39765	-101.042	0.725249	19.1813	9.31848	6.83038	-95.2467	4.15691	19.1401	28.0168	1.85203	-97.7103	1.10031	5.846
CAPN2	Unrelated|ENSG00000162909.18	CAPN2	3366	Unknown	19.8198	9.93538	-133.017	7.15456	16.2523	23.876	13.2133	-137.813	8.13909	35.0895	18.182	10.8071	-133.373	6.81732	26.0561
FBXO28	Unrelated|ENSG00000143756.12	FBXO28	5427	Unknown	115.237	2.44122	-140.974	1.68193	4.4502	81.9358	3.17691	-142.927	2.16433	5.96993	146.186	1.72096	-142.378	1.09756	3.98362
DEGS1	Unrelated|ENSG00000143753.13	DEGS1	2032	Unknown	57.3249	3.57422	-132.541	2.58916	5.76912	42.9501	3.96564	-127.811	2.72864	7.2543	58.8715	2.69564	-129.554	1.8231	5.17002
CNIH4	Unrelated|ENSG00000143771.12	CNIH4	4096	Unknown	25.1996	8.80137	-132.817	6.5617	13.3622	21.2782	8.74851	-130.662	5.51552	21.14	27.4002	7.40154	-136.389	4.87216	15.3926
DNAH14	Unrelated|ENSG00000185842.16	DNAH14	14065	Unknown	3.55256	20.6902	-110.238	14.0868	38.9471	4.10847	22.6773	-109.945	12.6415	110.024	4.44815	14.8666	-109.779	9.1462	39.6907
SRP9	Unrelated|ENSG00000143742.14	SRP9	1596	Unknown	42.4942	11.4954	-154.333	8.30496	18.6663	28.4514	10.7221	-140.9	6.89774	24.0644	42.8528	9.45483	-156.927	5.98772	22.46
EPHX1	Unrelated|ENSG00000143819.13	EPHX1	1789	Unknown	47.6033	14.5683	-148.144	11.9764	18.5919	70.9428	12.8375	-158.439	8.91043	22.9539	46.2163	13.9207	-153.145	9.18308	28.756
H3-3A	Unrelated|ENSG00000163041.13	H3-3A	1863	Unknown	70.9228	15.5791	-167.176	11.9402	22.4082	69.7719	13.8569	-165.705	8.88264	31.4925	76.8207	11.4066	-169.746	7.81648	21.0962
ENSG00000288674	Unrelated|ENSG00000288674.1	ENSG00000288674	9497	Unknown	55.1868	5.34073	-127.397	4.4302	6.72238	60.6587	6.38227	-138.645	4.81949	9.4449	59.7848	4.54404	-136.927	3.38106	6.92657
PSEN2	Unrelated|ENSG00000143801.18	PSEN2	5158	Unknown	22.541	6.1768	-109.5	5.12167	7.77947	20.4975	9.48192	-118.911	6.22941	19.8417	19.9978	5.39755	-116.031	3.74219	9.67911
COQ8A	Unrelated|ENSG00000163050.18	COQ8A	2866	Unknown	36.8417	4.58373	-113.011	3.82553	5.71675	38.4372	5.95434	-130.638	4.53417	8.66988	41.8358	4.2379	-127.233	3.20291	6.26109
ZNF678	Unrelated|ENSG00000181450.18	ZNF678	8543	Unknown	72.9144	1.24485	-120.479	0.599593	Inf	32.4814	2.54546	-113.652	1.53336	7.48793	47.7389	1.73308	-116.517	1.0923	4.19267
SNAP47	Unrelated|ENSG00000143740.15	SNAP47	4086	Unknown	93.3998	3.5999	-131.203	2.95333	4.60893	77.5731	5.57067	-144.245	3.98745	9.23904	89.249	3.08097	-139.119	2.1847	5.22419
ARF1	Unrelated|ENSG00000143761.17	ARF1	1840	Unknown	280.631	10.0158	-183.325	8.19912	12.8665	334.607	9.32109	-187.856	6.64759	15.5917	272.553	7.90684	-187.429	5.60976	13.3896
GUK1	Unrelated|ENSG00000143774.17	GUK1	1275	Unknown	29.1095	21.6618	-144.858	17.5297	28.3425	39.4546	17.4394	-152.685	12.0208	31.7524	25.0075	15.3644	-143.473	10.4998	28.6279
IBA57	Unrelated|ENSG00000181873.13	IBA57	7828	Unknown	84.4055	2.33116	-133.088	1.57884	4.45304	85.6143	2.21846	-136.272	1.35163	6.18509	100.377	2.41205	-140.773	1.50337	6.09765
OBSCN	Unrelated|ENSG00000154358.23	OBSCN	27019	Unknown	52.2771	9.21086	-144.73	7.31942	12.4205	26.215	8.02316	-134.739	5.67082	13.7104	49.8882	7.79615	-146.331	5.47385	13.5409
ENSG00000231563	Unrelated|ENSG00000231563.3	ENSG00000231563	988	Unknown	1.49002	4.383	-58.6891	2.85595	9.41956	2.51876	3.35234	-70.1687	1.91505	13.4375	2.09909	2.56058	-61.8582	1.51136	8.37409
RNF187	Unrelated|ENSG00000168159.15	RNF187	3118	Unknown	114.899	9.62106	-150.569	8.41225	11.2356	112.219	9.36465	-162.468	6.8207	14.935	109.883	8.99432	-163.692	6.64588	13.9095
RHOU	Unrelated|ENSG00000116574.6	RHOU	3965	Unknown	19.2209	4.27115	-119.369	2.78386	9.17061	35.635	1.8856	-119.242	1.31271	3.34577	32.7433	1.37914	-109.307	0.874058	3.267
RAB4A	Unrelated|ENSG00000168118.12	RAB4A	2987	Unknown	24.8137	10.2884	-136.507	7.63696	15.76	21.511	9.59117	-132.081	6.44779	18.715	21.2735	8.55237	-135.632	5.49966	19.2219
URB2	Unrelated|ENSG00000135763.10	URB2	5601	Unknown	211.326	1.45438	-153.311	0.714473	Inf	155.381	1.69868	-142.924	1.15591	3.20247	224.568	1.02511	-145.697	0.541789	9.49947
GALNT2	Unrelated|ENSG00000143641.10	GALNT2	4423	Unknown	32.5418	10.602	-133.055	8.66998	13.6419	23.0543	11.8394	-126.395	8.06236	22.2749	22.5229	8.51043	-130.709	5.69821	16.8033
COG2	Unrelated|ENSG00000135775.14	COG2	2963	Unknown	44.4849	5.19965	-140.74	3.56894	9.57433	31.274	3.9714	-120.721	3.06689	5.63261	53.2853	2.73102	-132.215	1.97175	4.44124
CAPN9	Unrelated|ENSG00000135773.13	CAPN9	2575	Unknown	3.98492	10.7826	-92.8337	8.07571	16.2188	1.03965	9.79075	-69.6052	6.82811	17.2948	1.53736	7.98797	-75.6821	5.12011	18.1592
ARV1	Unrelated|ENSG00000173409.14	ARV1	1428	Unknown	10.4005	7.00478	-107.42	5.14771	10.958	9.69056	7.03096	-102.514	4.84356	12.8211	14.6924	4.33646	-106.997	3.05974	7.44153
GNPAT	Unrelated|ENSG00000116906.13	GNPAT	2641	Unknown	21.9295	10.7145	-134.289	7.96811	16.3497	19.8906	9.2459	-130.029	6.03353	19.7739	20.767	7.82545	-131.273	5.36015	14.4898
SPRTN	Unrelated|ENSG00000010072.16	SPRTN	3559	Unknown	55.698	1.9028	-113.544	1.31385	3.44871	48.6492	2.83439	-121.858	2.03689	4.65822	58.6201	1.67046	-120.233	1.00093	5.04517
TSNAX-DISC1	Unrelated|ENSG00000270106.6	TSNAX-DISC1	3294	Unknown	11.1092	4.95321	-95.1382	3.84647	6.9541	12.5017	6.03114	-106.768	3.87761	13.5647	11.6505	4.64012	-106.308	2.86955	12.1158
TSNAX	Unrelated|ENSG00000116918.15	TSNAX	2634	Unknown	24.679	4.57231	-115.659	3.43455	6.83732	31.1211	4.86555	-126.916	3.26812	9.51774	28.8904	3.70831	-122.102	2.526	6.97128
DISC1	Unrelated|ENSG00000162946.23	DISC1	7084	Unknown	5.35553	4.91922	-92.8326	3.18166	10.8381	1.85842	5.97737	-74.2722	2.90448	-103.097	1.71026	20.2618	-81.4919	6.4941	-18.0904
NTPCR	Unrelated|ENSG00000135778.12	NTPCR	6324	Unknown	19.4708	9.95575	-122.824	7.91271	13.421	12.6005	9.7621	-118.278	6.8119	17.22	20.4581	7.45596	-126.211	5.25428	12.8336
MAP3K21	Unrelated|ENSG00000143674.11	MAP3K21	5853	Unknown	46.1747	3.1537	-122.619	2.30982	4.96915	34.7292	3.37032	-121.606	2.42976	5.49896	60.209	1.89986	-125.522	1.29076	3.5975
KCNK1	Unrelated|ENSG00000135750.15	KCNK1	2061	Unknown	41.9005	2.37196	-109.804	1.7517	3.67227	32.962	3.49299	-114.407	2.58526	5.3831	45.6768	1.60336	-112.371	0.972825	4.5569
COA6	Unrelated|ENSG00000168275.16	COA6	1741	Unknown	11.6025	7.06784	-111.986	5.09361	11.541	17.7148	6.06003	-114.804	4.25584	10.5197	11.2432	5.60029	-111.819	3.79552	10.6774
GGPS1	Unrelated|ENSG00000152904.11	GGPS1	2895	Unknown	23.7801	4.82809	-118.545	3.53426	7.6163	34.3789	5.44918	-129.853	3.66918	10.5835	25.9432	5.28313	-125.681	3.18966	15.3725
TBCE.1	Host|ENSG00000285053.1	TBCE.1	2624	Unknown	15.7769	11.374	-126.91	8.53065	17.0603	15.5818	9.0292	-123.15	5.88425	19.3955	19.8702	6.92755	-128.374	4.66398	13.4602
TBCE.3	OtherIntrons|ENSG00000285053.1	TBCE.3	113731	Unknown	158.853	2.1084	-146.505	1.38646	4.39893	218.054	1.9777	-155.508	1.23061	5.03347	171.886	1.99716	-149.292	1.24686	5.01483
TBCE	Host|ENSG00000284770.2	TBCE	5374	Unknown	16.2841	10.9519	-126.755	8.22072	16.4009	16.3286	8.3388	-123.114	5.45413	17.7006	20.3334	6.60263	-127.951	4.49744	12.413
TBCE.2	OtherIntrons|ENSG00000284770.2	TBCE.2	74874	Unknown	7658.45	0.0198061	-128.589	NA	NA	191.365	0.930573	-136.338	0.357318	-1.53985	180.58	0.925819	-131.787	0.386994	-2.35977
Post||snoDB1434	Post||snoDB1434	Post||snoDB1434	3262	Unknown	6.00955	1.94697	-70.4182	1.17169	5.75494	10.2031	1.5789	-77.0658	0.772268	-35.4793	112.856	0.118744	-81.8076	NA	NA
GPR137B	Unrelated|ENSG00000077585.14	GPR137B	2033	Unknown	5.19794	6.50345	-94.3979	4.47867	11.8696	7.82029	5.89253	-96.0654	3.87564	12.2864	6.0008	5.59481	-90.631	3.66081	11.8609
EDARADD	Unrelated|ENSG00000186197.15	EDARADD	3116	Unknown	9.60466	4.45099	-102.885	2.93899	9.16715	12.1667	2.88194	-98.2921	2.04951	4.85304	10.4438	3.68277	-100.871	2.35563	8.43495
LGALS8	Unrelated|ENSG00000116977.19	LGALS8	6420	Unknown	42.3874	5.06514	-140.099	3.42304	9.7354	29.709	9.88423	-132.101	6.17954	24.6802	34.3151	6.84737	-135.899	4.00475	23.5965
MTR	Unrelated|ENSG00000116984.15	MTR	10547	Unknown	39.4281	9.65153	-144.715	7.27267	14.3431	36.979	4.95491	-133.148	3.52828	8.31839	37.6342	5.01317	-140.005	3.54078	8.58183
CHRM3	Host|ENSG00000133019.12	CHRM3	9179	Unknown	10.3492	1.8436	-83.4717	1.06639	6.79839	7.50981	3.58269	-81.663	2.48225	6.43584	9.95788	2.14503	-84.1232	1.27464	6.76349
CHRM3.1	OtherIntrons|ENSG00000133019.12	CHRM3.1	370741	Unknown	98.336	1.29704	-131.835	0.598748	Inf	105.231	0.965965	-134.401	0.351852	-1.29595	94.8126	1.04645	-126.992	0.429239	-2.38962
Pre||snoDB1403	Pre||snoDB1403	Pre||snoDB1403	71114	Unknown	54.6736	1.46656	-119.266	0.751314	30.5519	40.7417	1.19663	-122.275	0.53232	-4.82599	59.6018	0.79522	-113.151	0.226997	-0.529014
Post||snoDB1403	Post||snoDB1403	Post||snoDB1403	77598	Unknown	29.0587	1.48756	-102.271	0.801128	10.3905	27.5652	1.0663	-110.112	0.421551	-2.01389	16.6532	1.43091	-98.114	0.705676	-51.6206
EXO1	Unrelated|ENSG00000174371.17	EXO1	3449	Unknown	80.0681	2.44404	-143.579	1.41854	8.82086	16.3953	3.67896	-114.732	2.4074	7.79743	66.6936	2.03565	-134.658	1.2469	5.54015
SDCCAG8	Unrelated|ENSG00000054282.16	SDCCAG8	2581	Unknown	4.17983	6.46024	-84.7432	4.68637	10.3949	3.68848	5.47664	-86.528	3.39006	14.2435	4.99155	4.94275	-83.5933	3.2626	10.1907
DESI2	Unrelated|ENSG00000121644.19	DESI2	4017	Unknown	45.0299	6.0557	-137.714	4.51614	9.18784	46.6185	5.44996	-138.787	3.78226	9.74821	41.6201	5.02512	-137.498	3.40486	9.58743
COX20	Unrelated|ENSG00000203667.10	COX20	2295	Unknown	14.048	9.89909	-122.952	7.26914	15.5109	12.9241	9.8957	-122.019	6.03052	27.5598	11.7621	7.3059	-122.031	4.86061	14.7025
EFCAB2	Unrelated|ENSG00000203666.13	EFCAB2	1418	Unknown	1.11878	8.94072	-67.5747	5.96284	17.8602	0.05117	10.6602	-30.7781	5.11004	-123.768	0.624411	10.176	-61.7191	6.31849	26.1261
CNST	Unrelated|ENSG00000162852.14	CNST	5127	Unknown	78.4117	2.56086	-133.086	1.77291	4.6095	66.2012	4.43127	-137.426	3.12853	7.59312	74.5365	2.34511	-133.164	1.48351	5.594
SCCPDH	Unrelated|ENSG00000143653.10	SCCPDH	2141	Unknown	26.5209	13.1871	-143.612	9.77559	20.256	7.50771	13.6741	-120.094	8.33581	38.0264	23.7796	8.72892	-143.012	6.16811	14.9255
LINC01341	Unrelated|ENSG00000227953.7	LINC01341	2773	Unknown	7.71271	1.15897	-70.7424	0.459775	Inf	2.24777	1.72034	-57.5556	0.852209	-92.0587	7.08985	1.50948	-76.4814	0.813362	10.4713
ZNF496-DT	Unrelated|ENSG00000289234.2	ZNF496-DT	3564	Unknown	5.93206	3.82436	-88.6141	2.47658	8.39062	9.57237	1.89034	-79.6536	1.37332	3.03173	6.63075	1.78089	-88.9296	1.21148	3.36024
ZNF672	Unrelated|ENSG00000171161.13	ZNF672	3045	Unknown	119.42	2.36391	-132.614	1.78663	3.49233	96.2668	3.43829	-137.379	2.58353	5.13829	101.557	2.14312	-137.129	1.3918	4.65713
PGBD2	Unrelated|ENSG00000185220.12	PGBD2	2879	Unknown	25064.4	0.00326786	-112.995	NA	NA	46.0927	1.8636	-110.835	1.14718	4.96306	727.955	0.121033	-115.655	NA	NA
WASH7P	Unrelated|ENSG00000227232.5	WASH7P	1351	Unknown	10.2921	5.63471	-91.9929	4.54883	7.40159	11.3151	8.10854	-106.701	5.74297	13.7878	11.5081	4.26711	-100.063	3.07913	6.94762
ENSG00000241860	Unrelated|ENSG00000241860.7	ENSG00000241860	4860	Unknown	3.59479	3.72896	-66.2761	2.73241	5.86973	3.21413	6.03024	-73.58	4.28017	10.2014	3.48087	2.84164	-63.8642	1.87586	5.85715
WASH9P	Unrelated|ENSG00000279457.4	WASH9P	1397	Unknown	13.4887	5.15978	-95.635	4.18843	6.71769	13.6174	7.15087	-110.008	5.15924	11.6469	16.6415	3.67014	-100.518	2.72808	5.60601
ENSG00000228463	Unrelated|ENSG00000228463.10	ENSG00000228463	2256	Unknown	1.29252	4.91624	-46.5681	3.69822	7.33061	2.85696	4.29374	-69.1015	3.01396	7.46242	1.62384	3.19723	-55.0886	2.1771	6.01633
ENSG00000228327	Unrelated|ENSG00000228327.5	ENSG00000228327	6469	Unknown	14.4931	3.31931	-92.6533	2.52847	4.83002	12.8252	4.67267	-102.536	3.2964	8.02179	17.361	2.56	-96.7575	1.70794	5.10856
NOC2L	Unrelated|ENSG00000188976.11	NOC2L	2757	Unknown	72.9539	14.7272	-167.88	11.1686	21.6138	80.9501	9.62126	-165.669	6.97485	15.5037	60.9114	8.88048	-162.824	6.61011	13.5263
HES4	Unrelated|ENSG00000188290.11	HES4	1040	Unknown	11.5739	14.4771	-132.293	9.90119	26.9171	12.513	8.58724	-115.539	5.99283	15.1429	10.0169	6.53212	-119.48	4.84786	10.0097
RNF223	Unrelated|ENSG00000237330.3	RNF223	1900	Unknown	74.8915	3.05818	-149.064	1.79274	10.3973	75.548	1.71778	-123.05	1.25216	2.73471	83.478	1.46121	-134.552	1.00307	2.68974
C1orf159	Host|ENSG00000131591.18	C1orf159	2429	Unknown	9.7248	6.88497	-103.284	5.1751	10.2823	7.99748	6.26875	-97.5141	4.6487	9.62195	8.19933	3.51881	-93.2125	2.60934	5.40142
C1orf159.1	OtherIntrons|ENSG00000131591.18	C1orf159.1	8917	Unknown	3.92885	5.58415	-90.8218	3.48804	13.9934	6.0306	2.42992	-90.296	1.61588	4.8968	6.03234	1.77799	-82.4167	1.05412	5.67528
Post||snoDB1311	Post||snoDB1311	Post||snoDB1311	5997	Unknown	4.2887	7.66382	-94.221	5.24509	14.2223	13.0747	3.3407	-107.009	2.23632	6.60007	8.75446	1.7188	-82.4485	1.11578	3.74016
Pre||snoDB1311	Pre||snoDB1311	Pre||snoDB1311	7604	Unknown	9.35696	4.807	-94.4789	3.57961	7.31528	14.5002	2.84089	-107.026	1.90601	5.57575	10.5215	1.81641	-90.7881	1.16632	4.1038
TNFRSF18	Unrelated|ENSG00000186891.14	TNFRSF18	1083	Unknown	1.82664	31.4308	-100.338	21.0542	61.9755	1.9707	7.58432	-87.4933	5.53324	12.0517	1.30181	9.01875	-94.2755	6.94681	12.8519
SDF4	Unrelated|ENSG00000078808.20	SDF4	2079	Unknown	48.7375	15.8293	-149.917	13.0443	20.1263	61.8627	12.2014	-154.455	8.75864	20.1032	45.4179	9.89161	-151.263	7.18981	15.8464
UBE2J2	Unrelated|ENSG00000160087.21	UBE2J2	2387	Unknown	54.9181	4.09793	-135.729	2.95443	6.68554	41.4145	4.35081	-135	3.0479	7.59936	62.1014	2.54463	-134.648	1.77076	4.51998
ACAP3	Host|ENSG00000131584.19	ACAP3	3793	Unknown	16.0428	13.3418	-125.798	10.4894	18.3249	18.4154	12.6169	-130.915	8.54565	24.0967	16.5609	9.71202	-124.768	6.97848	15.9661
ACAP3.1	OtherIntrons|ENSG00000131584.19	ACAP3.1	8122	Unknown	3.77697	3.56833	-60.3123	2.77629	4.99267	3.1425	4.4312	-75.6802	2.86788	9.74138	2.34205	3.47721	-71.0486	2.17006	8.74454
Pre|SNORD167|snoDB0975	Pre|SNORD167|snoDB0975	Pre|SNORD167|snoDB0975	2956	Unknown	2.80746	7.33962	-72.6802	5.64659	10.4827	3.66547	4.93445	-73.7852	3.64102	7.65317	3.05479	3.85073	-73.7045	2.70224	6.69706
INTS11	Unrelated|ENSG00000127054.22	INTS11	2629	Unknown	23.6066	10.8656	-124.734	8.96338	13.7928	25.734	9.72423	-128.554	7.00862	15.8754	25.6476	7.93669	-130.741	5.91801	12.0455
DVL1	Unrelated|ENSG00000107404.21	DVL1	3305	Unknown	34.7774	10.5551	-140.444	8.21479	14.7599	56.4056	9.04517	-151.771	6.43602	15.2121	39.2744	5.28449	-133.895	4.10119	7.42752
AURKAIP1	Unrelated|ENSG00000175756.14	AURKAIP1	1072	Unknown	35.0188	17.193	-148.46	13.608	23.3424	33.6199	11.8715	-144.568	8.74109	18.4951	28.9992	11.2029	-145.692	8.52614	16.3296
CCNL2	Unrelated|ENSG00000221978.13	CCNL2	3112	Unknown	51.1318	3.99117	-130.322	2.97438	6.06423	36.7098	4.03229	-125.114	2.84621	6.91316	54.2182	3.15307	-130.304	2.3167	4.9345
MRPL20	Unrelated|ENSG00000242485.6	MRPL20	1049	Unknown	13.1691	13.467	-124.034	10.3162	19.3885	14.3928	10.783	-125.104	7.2809	20.7766	13.51	7.77953	-122.106	5.72375	12.1397
SSU72	Unrelated|ENSG00000160075.12	SSU72	4176	Unknown	82.4613	8.70183	-152.791	7.00377	11.4868	80.4063	8.50764	-152.496	6.04893	14.334	81.5723	6.69635	-156.406	4.84429	10.8411
CDK11B	Host|ENSG00000248333.9	CDK11B	2992	Unknown	28.6675	5.72857	-119.367	4.53331	7.77981	22.2087	9.71847	-126.65	6.40267	20.1576	28.859	4.58609	-121.672	3.34805	7.27696
CDK11B.1	OtherIntrons|ENSG00000248333.9	CDK11B.1	17986	Unknown	19.9929	2.22655	-93.038	1.58151	3.76015	40.264	1.71338	-109.881	1.05194	4.61559	27.1476	1.73889	-100.391	1.09865	4.16756
SLC35E2B	Unrelated|ENSG00000189339.12	SLC35E2B	6434	Unknown	70.5086	5.58287	-138.324	4.4935	7.36947	52.241	6.0405	-142.197	4.2419	10.4871	82.5852	4.57011	-149.126	3.11617	8.56756
CDK11A	Unrelated|ENSG00000008128.23	CDK11A	2984	Unknown	20.6715	4.8029	-106.357	3.82755	6.44532	20.2209	9.30335	-122.406	5.94789	21.345	17.1704	5.36346	-113.286	3.78491	9.20072
ENSG00000268575	Unrelated|ENSG00000268575.1	ENSG00000268575	5079	Unknown	26.3779	5.17082	-115.156	4.08144	7.05346	25.9324	8.04327	-126.957	5.40061	15.7504	28.349	5.09373	-125.048	3.51496	9.24716
SLC35E2A	Unrelated|ENSG00000215790.8	SLC35E2A	2078	Unknown	10.264	6.70407	-98.886	5.28835	9.15489	11.6897	5.62837	-107.321	3.85521	10.4217	10.973	6.51995	-106.289	4.39154	12.6518
NADK	Unrelated|ENSG00000008130.15	NADK	3653	Unknown	35.054	7.82514	-118.124	6.80699	9.20143	40.048	7.8529	-134.403	5.78235	12.2335	36.4281	5.54852	-132.13	4.05835	8.76801
GNB1	Unrelated|ENSG00000078369.18	GNB1	3163	Unknown	162.018	13.2543	-184.021	10.1462	19.1077	70.8494	12.067	-162.519	7.79551	26.6933	134.323	8.92545	-180.015	6.06123	16.9219
TMEM52	Unrelated|ENSG00000178821.13	TMEM52	1118	Unknown	1.7033	14.4652	-77.8639	10.9145	21.4401	5.41961	7.46773	-98.6351	5.4421	11.8953	2.10809	7.75438	-79.6197	5.47822	13.2665
FAAP20	Unrelated|ENSG00000162585.17	FAAP20	1413	Unknown	8.5682	13.3937	-101.302	11.3229	16.3915	14.2687	13.3799	-123.911	8.79962	27.9044	5.52835	9.93328	-107.754	7.05535	16.7766
MORN1	Host|ENSG00000116151.14	MORN1	1645	Unknown	3.52526	7.15726	-71.5515	5.8017	9.33939	3.02336	7.47547	-73.3391	4.8217	16.6262	4.92878	4.28909	-79.6599	2.91888	8.08391
MORN1.1	OtherIntrons|ENSG00000116151.14	MORN1.1	67136	Unknown	54.2656	3.13877	-118.248	2.48964	4.24578	51.9947	2.89531	-123.509	2.01738	5.12614	70.7765	2.25669	-128.809	1.54579	4.17823
PEX10	Unrelated|ENSG00000157911.11	PEX10	2905	Unknown	15.2211	14.3896	-129.648	10.9322	21.0454	9.86912	8.17782	-116.571	6.11037	12.3598	14.4758	7.34819	-127.475	5.36036	11.6794
PANK4	Unrelated|ENSG00000157881.16	PANK4	2641	Unknown	15.4625	4.74998	-108.239	3.46012	7.57305	17.6641	3.87415	-99.8767	2.96239	5.5967	23.3558	2.37385	-103.876	1.66858	4.11182
MEGF6	Unrelated|ENSG00000162591.17	MEGF6	7443	Unknown	5.33252	9.97687	-98.2236	7.45894	15.061	6.48501	7.09068	-104.331	4.9662	12.3917	4.28326	15.4269	-98.5224	9.55523	40.0176
WRAP73	Unrelated|ENSG00000116213.16	WRAP73	1998	Unknown	24.5971	3.48366	-101.877	2.77606	4.67539	28.7209	4.14588	-117.11	2.99481	6.73421	30.3084	2.61493	-111.919	1.80027	4.7763
LRRC47	Unrelated|ENSG00000130764.10	LRRC47	4303	Unknown	88.0685	4.50719	-140.68	3.55637	6.15195	68.1356	5.31777	-144.819	3.86442	8.52321	84.019	3.48722	-144.596	2.56092	5.46336
CEP104	Unrelated|ENSG00000116198.14	CEP104	6559	Unknown	34.784	8.27197	-132.135	6.5879	11.1127	40.8742	7.8291	-142.785	5.48618	13.6648	29.0327	6.87411	-131.694	4.57832	13.7882
C1orf174	Unrelated|ENSG00000198912.12	C1orf174	1645	Unknown	55.3999	2.37121	-119.115	1.69986	3.91899	49.5043	2.99241	-125.141	2.10055	5.20044	61.222	2.07548	-126.813	1.36568	4.32159
NPHP4	Host|ENSG00000131697.18	NPHP4	4955	Unknown	12.104	10.2497	-116.1	7.85283	14.7524	15.0236	7.46746	-111.796	5.60427	11.1865	12.0565	6.07856	-110.408	4.28326	10.4648
NPHP4.1	OtherIntrons|ENSG00000131697.18	NPHP4.1	115703	Unknown	109.64	1.11451	-124.922	0.523573	Inf	108.254	1.13126	-130.2	0.553672	-26.1848	111.815	0.827444	-121.213	0.316664	-1.34982
Pre||snoDB1568	Pre||snoDB1568	Pre||snoDB1568	8404	Unknown	5.37091	1.97289	-72.1247	1.11036	8.83904	8.59066	1.1865	-71.7981	0.66874	5.25549	4.90436	1.56551	-67.5969	0.870695	7.74987
CHD5	Unrelated|ENSG00000116254.18	CHD5	9850	Unknown	1.27822	12.7503	-78.049	8.58514	24.7652	3.7853	9.90543	-98.0616	6.3186	22.9113	1.50814	9.6792	-79.5858	4.89636	417.488
ENSG00000285629	Unrelated|ENSG00000285629.1	ENSG00000285629	663	Unknown	13.7087	28.1155	-145.805	19.2954	51.7882	14.5071	22.7572	-147.324	12.693	109.886	11.628	19.1246	-143.215	12.6302	39.3669
RPL22	Unrelated|ENSG00000116251.11	RPL22	2061	Unknown	35.0204	28.6877	-168.104	19.7955	52.0841	35.2811	22.046	-166.995	12.8826	76.3637	29.9783	17.6326	-167.136	11.7405	35.3968
ICMT	Unrelated|ENSG00000116237.16	ICMT	4795	Unknown	82.4503	7.78966	-157.714	5.84589	11.6699	26.897	8.13777	-126.682	5.44375	16.1106	99.8082	4.32324	-156.674	3.07302	7.28845
GPR153	Unrelated|ENSG00000158292.7	GPR153	4198	Unknown	5.95556	16.566	-113.064	12.1461	26.0431	7.84019	10.8349	-113.204	7.49324	19.556	5.25623	7.02178	-99.2668	5.47218	9.79571
ACOT7	Unrelated|ENSG00000097021.20	ACOT7	1813	Unknown	28.028	16.0813	-144.309	12.4617	22.6643	38.2744	8.89313	-140.16	6.63881	13.4656	24.7788	10.6223	-143.025	7.49933	18.2021
HES2	Unrelated|ENSG00000069812.11	HES2	4262	Unknown	3.67166	6.77976	-75.7032	5.2899	9.43786	60.6608	3.68659	-146.685	2.76509	5.5293	7.75151	2.74521	-88.8653	2.07813	4.04302
TNFRSF25	Unrelated|ENSG00000215788.11	TNFRSF25	1968	Unknown	6.10302	3.46552	-84.2638	2.31614	6.87937	5.81645	4.81793	-82.1815	3.42336	8.12972	6.72121	3.61097	-84.4043	2.41778	7.12937
PLEKHG5	Unrelated|ENSG00000171680.23	PLEKHG5	4191	Unknown	22.0927	4.6941	-106.737	3.76093	6.24318	28.5166	4.75242	-121.206	3.62867	6.88443	29.7712	2.81401	-112.675	2.11398	4.20718
NOL9	Unrelated|ENSG00000162408.11	NOL9	6627	Unknown	86.1714	5.28492	-150.954	3.90016	8.19431	65.6337	4.24937	-142.423	3.16256	6.47423	90.7288	3.45583	-151.555	2.53232	5.43959
KLHL21	Unrelated|ENSG00000162413.17	KLHL21	6445	Unknown	309.732	0.781965	-131.46	0.309128	Inf	166.006	2.68472	-144.318	2.07186	3.81245	211.068	1.20024	-138.27	0.687516	4.72082
DNAJC11	Unrelated|ENSG00000007923.17	DNAJC11	3201	Unknown	34.5825	12.1921	-151.329	8.73943	20.1543	40.2882	6.21074	-143.69	4.58991	9.60123	37.1711	6.1583	-146.453	4.42927	10.1016
ERRFI1	Unrelated|ENSG00000116285.13	ERRFI1	3097	Unknown	44704.4	0.0043634	-138.191	NA	NA	488.873	0.868326	-156.443	0.290473	-0.877673	459.215	0.460633	-142.051	0.02774	-0.0315386
RERE	Host|ENSG00000142599.19	RERE	8026	Unknown	184.263	3.53324	-147.786	2.88072	4.56793	73.6792	7.35973	-143.541	5.08647	13.3069	176.869	2.67359	-151.455	1.86634	4.71141
RERE.1	OtherIntrons|ENSG00000142599.19	RERE.1	395651	Unknown	514.298	1.95955	-173.837	1.24924	4.54226	725.746	1.12421	-174.27	0.559071	-103.656	753.867	1.13134	-175.524	0.564672	-320.46
Post|SNORD128|snoDB0976	Post|SNORD128|snoDB0976	Post|SNORD128|snoDB0976	28776	Unknown	18.8733	1.92531	-100.665	1.09524	7.95193	17.9519	1.62507	-92.4535	0.965762	5.1213	26.0257	1.08788	-101.207	0.481728	-4.21189
Pre|SNORA77|snoDB0001	Pre|SNORA77|snoDB0001	Pre|SNORA77|snoDB0001	13839	Unknown	9.87961	1.48877	-85.2255	0.665396	Inf	11.1576	1.11303	-84.3562	0.458687	-2.60932	7.24166	1.63475	-83.6728	0.869431	13.6518
ENO1	Unrelated|ENSG00000074800.16	ENO1	1782	Unknown	521.041	18.9864	-222.278	13.9711	29.6188	357.082	10.3711	-207.592	7.43371	17.1466	366.063	10.2323	-215.25	7.29857	17.1096
GPR157	Unrelated|ENSG00000180758.12	GPR157	5197	Unknown	123.932	1.59305	-128.845	1.04121	3.38943	41.3767	2.84427	-118.516	2.03649	4.71413	87.8316	1.47668	-123.375	0.905597	3.99771
MIR34AHG	Unrelated|ENSG00000228526.8	MIR34AHG	4457	Unknown	34.7704	1.83386	-103.139	1.22501	3.64596	203.349	0.67547	-130.594	0.164251	-0.319759	74.5788	0.781688	-105.678	0.247578	-0.675421
CLSTN1	Unrelated|ENSG00000171603.18	CLSTN1	4760	Unknown	138.629	9.28402	-166.078	7.51545	12.1411	48.079	16.9481	-147.115	9.86752	60.0081	122.553	8.25464	-170.287	5.36593	17.8804
CTNNBIP1	Unrelated|ENSG00000178585.15	CTNNBIP1	3006	Unknown	16.6583	12.4759	-118.517	10.3551	15.6893	14.2442	13.1253	-122.549	8.94542	24.6378	16.4063	10.0536	-123.752	6.95565	18.1269
LZIC	Unrelated|ENSG00000162441.12	LZIC	4989	Unknown	26.512	6.87857	-123.292	5.37717	9.54321	22.0073	7.73158	-123.411	5.09233	16.0499	26.7931	6.39131	-131.191	4.30151	12.4303
DFFA	Unrelated|ENSG00000160049.12	DFFA	6035	Unknown	50.4443	10.347	-152.296	7.7916	15.3964	87.7639	6.01244	-161.567	4.41362	9.42752	64.6841	4.52812	-149.249	3.40358	6.76243
CASZ1	Unrelated|ENSG00000130940.15	CASZ1	7934	Unknown	59.021	3.96756	-137.376	2.83397	6.6126	54.4098	4.03405	-136.888	3.04962	5.95702	43.444	2.77585	-122.047	2.0383	4.3498
SRM	Unrelated|ENSG00000116649.10	SRM	1260	Unknown	46.8421	19.0391	-171.032	12.9413	36.0034	47.9454	8.67342	-154.669	6.37154	13.5793	37.0596	7.5067	-157.68	5.74398	10.8303
EXOSC10	Unrelated|ENSG00000171824.14	EXOSC10	2796	Unknown	62.8486	5.53922	-141.097	4.2357	8.00171	56.012	6.45441	-144.389	4.36244	12.4014	77.8736	4.41919	-147.966	3.16773	7.30528
MTOR	Host|ENSG00000198793.14	MTOR	8721	Unknown	91.5143	11.532	-164.789	9.04478	15.906	78.4355	7.40407	-156.462	5.41566	11.6997	98.2619	7.02693	-164.367	5.07423	11.4227
MTOR.1	OtherIntrons|ENSG00000198793.14	MTOR.1	115769	Unknown	148.022	1.19138	-129.697	0.638994	8.79042	132.743	1.29038	-132.163	0.734513	5.30535	156.576	1.07904	-134.728	0.533455	-47.4617
Pre|snoU13|snoDB1942	Pre|snoU13|snoDB1942	Pre|snoU13|snoDB1942	29644	Unknown	4615.53	0.0126649	-108.43	NA	NA	65.2061	0.884368	-112.582	0.326741	-1.25153	52.1015	1.1739	-111.218	0.633304	8.01876
FBXO2	Unrelated|ENSG00000116661.11	FBXO2	1287	Unknown	1.90774	20.5437	-82.0647	16.1632	28.1812	2.66974	14.4584	-105.789	9.40209	31.2806	1.11025	12.2556	-80.5147	7.62085	31.2774
MAD2L2	Unrelated|ENSG00000116670.16	MAD2L2	1860	Unknown	12.5086	12.4923	-113.482	10.232	16.0344	19.0673	11.7698	-128.469	7.99082	22.3298	14.0206	9.00779	-121.301	6.56061	14.3667
MTHFR	Unrelated|ENSG00000177000.13	MTHFR	8378	Unknown	47.7924	3.59198	-126.932	2.643	5.60421	70.2257	4.17312	-134.836	3.04678	6.62068	46.1782	4.58538	-130.832	3.00484	9.67378
KIAA2013	Unrelated|ENSG00000116685.16	KIAA2013	2819	Unknown	79.7236	5.35351	-134.496	4.49582	6.61561	83.8969	7.86775	-149.878	5.86955	11.9287	91.5336	3.5164	-142.58	2.62421	5.32772
DHRS3	Unrelated|ENSG00000162496.9	DHRS3	2201	Unknown	20.0189	7.72232	-128.972	5.44938	13.2481	18.6193	5.47602	-129.252	4.15761	8.01886	18.9705	5.87198	-129.72	3.63698	15.233
TMEM51-AS1	Unrelated|ENSG00000175147.13	TMEM51-AS1	7100	Unknown	1.46099	6.20487	-61.2061	4.36041	10.7537	5.0896	2.13327	-76.8869	1.44914	4.041	3.931	1.84845	-70.0269	1.33638	2.99669
CASP9	Unrelated|ENSG00000132906.18	CASP9	4463	Unknown	11.76	4.88417	-98.6472	3.70237	7.17416	7.47207	9.36244	-98.1822	6.01118	21.1583	12.0161	5.20781	-103.605	3.31787	12.1007
AGMAT	Unrelated|ENSG00000116771.6	AGMAT	3095	Unknown	3.62124	20.1883	-111.207	13.5864	39.2703	3.83699	9.44969	-108.455	6.52627	17.1174	2.0826	8.49508	-108.012	6.0749	14.1206
SPEN-AS1	Unrelated|ENSG00000179743.4	SPEN-AS1	2473	Unknown	12.3982	2.36572	-80.1325	1.75365	3.63415	15.5762	1.97267	-90.0737	1.22543	5.05522	17.177	1.44274	-81.5353	0.896747	3.68848
ZBTB17	Unrelated|ENSG00000116809.12	ZBTB17	2770	Unknown	55.4919	1.97342	-101.28	1.57459	2.6428	30.7743	5.58681	-121.026	3.92657	9.67954	40.4444	2.46253	-113.043	1.7785	4.00156
FAM131C	Unrelated|ENSG00000185519.9	FAM131C	1720	Unknown	0.854197	24.3156	-85.0532	14.9655	64.8033	0.556554	6.71692	-79.445	4.81955	11.0782	0.344297	6.46529	-62.9967	5.26063	8.38556
EPHA2	Unrelated|ENSG00000142627.13	EPHA2	3946	Unknown	83.4954	2.59648	-142.046	1.62877	6.39748	219.723	2.01722	-156.225	1.45193	3.3033	110.765	1.57441	-135.302	1.09256	2.81666
ARHGEF19	Unrelated|ENSG00000142632.17	ARHGEF19	3322	Unknown	12.1569	11.751	-131.767	7.76099	24.1849	10.0853	4.72072	-105.297	3.6714	6.60991	11.0145	4.16701	-110.878	3.16628	6.09265
CPLANE2	Unrelated|ENSG00000132881.12	CPLANE2	1574	Unknown	5.50149	5.31687	-88.0764	3.79112	8.89783	5.6656	4.02955	-84.9916	3.0555	5.91524	4.9417	2.85824	-81.6343	2.05594	4.68741
FBXO42	Unrelated|ENSG00000037637.11	FBXO42	6227	Unknown	98.569	2.34224	-130.291	1.72162	3.66252	52.2396	3.32504	-128.069	2.25748	6.30815	99.5167	1.80424	-132.639	1.16974	3.94309
CROCCP3	Unrelated|ENSG00000080947.15	CROCCP3	5368	Unknown	8.51886	2.19765	-83.357	1.32935	6.33649	21.0086	1.36637	-85.1426	0.752506	7.41615	10.0687	2.38232	-89.5494	1.38135	8.65146
NBPF1	Unrelated|ENSG00000219481.11	NBPF1	5932	Unknown	97.0183	5.96366	-158.979	4.29115	9.77262	96.1561	4.33677	-151.158	3.3589	6.11783	122.729	2.74596	-145.898	2.12198	3.88974
CROCCP2	Host|ENSG00000215908.11	CROCCP2	2773	Unknown	14.8367	2.56423	-92.2862	1.79532	4.48516	12.5625	5.69694	-106.884	3.57389	14.0334	14.4306	2.62342	-100.682	1.59753	7.33149
CROCCP2.1	OtherIntrons|ENSG00000215908.11	CROCCP2.1	35071	Unknown	103.977	1.44966	-124.291	0.888148	3.94171	124.684	1.53634	-128.787	0.950703	4.00094	133.161	1.33283	-129.667	0.771962	4.87424
ATP13A2	Unrelated|ENSG00000159363.19	ATP13A2	3996	Unknown	33.1579	15.1584	-134.635	12.9387	18.2973	40.0903	15.7934	-142.635	10.9682	28.1984	44.7496	10.1684	-148.574	7.52528	15.6735
ENSG00000288636	Unrelated|ENSG00000288636.1	ENSG00000288636	312	Unknown	0.909019	13.7188	-69.1478	9.50999	24.6106	1.60886	13.6384	-70.3716	7.76999	55.7272	1.1578	9.94303	-72.4057	6.505	21.089
SDHB	Unrelated|ENSG00000117118.10	SDHB	1015	Unknown	29.8271	13.792	-147.069	10.2528	21.0627	7.6228	12.5462	-113.06	7.78015	32.3854	29.7925	9.37037	-145.798	6.37005	17.7135
PADI2	Unrelated|ENSG00000117115.13	PADI2	4361	Unknown	4.1831	21.3952	-108.398	15.7135	33.513	2.91486	14.4109	-98.5431	9.78048	27.3679	4.16869	17.9061	-100.861	12.0902	34.5044
RCC2	Unrelated|ENSG00000179051.14	RCC2	4040	Unknown	129.999	13.4745	-183.406	9.85704	21.2865	78.4871	7.06294	-161.216	5.14274	11.2715	135.458	6.72461	-178.021	4.97007	10.3939
ALDH4A1	Unrelated|ENSG00000159423.17	ALDH4A1	3139	Unknown	18.9221	18.5371	-129.385	15.329	23.4434	15.5463	13.4982	-133.169	9.72063	22.0783	17.8407	13.8564	-138.626	9.21417	27.9256
IFFO2	Unrelated|ENSG00000169991.11	IFFO2	6179	Unknown	57.1556	2.72245	-123.28	1.9861	4.32651	78.3152	2.60578	-133.003	1.92934	4.01264	96.617	1.31059	-120.293	0.785545	3.95219
UBR4	Host|ENSG00000127481.15	UBR4	15892	Unknown	240.796	11.6737	-192.044	8.83172	17.2126	240.958	7.79811	-187.665	5.63886	12.6371	227.357	6.53277	-183.587	4.69112	10.755
UBR4.1	OtherIntrons|ENSG00000127481.15	UBR4.1	119359	Unknown	166.455	1.24517	-130.92	0.720411	4.58495	144.665	1.44001	-138.747	0.849938	4.70984	194.152	1.03792	-140.209	0.487136	-7.94383
EMC1	Unrelated|ENSG00000127463.16	EMC1	6640	Unknown	47.1307	13.0644	-150.888	10.3028	17.8484	39.7615	7.74299	-147.468	5.7462	11.8666	44.2065	6.94317	-145.086	5.21322	10.3915
AKR7A2	Unrelated|ENSG00000053371.13	AKR7A2	1360	Unknown	24.2842	13.8826	-126.377	11.7842	16.8903	15.348	11.2236	-119.281	8.16496	17.9466	26.538	10.5818	-142.026	7.21435	19.8446
CAPZB	Unrelated|ENSG00000077549.19	CAPZB	5943	Unknown	76.3207	15.5855	-168.353	12.0133	22.1814	45.3531	13.3323	-151.065	8.78383	27.6503	55.4266	10.2897	-160.881	7.15831	18.291
TMCO4	Unrelated|ENSG00000162542.14	TMCO4	2946	Unknown	5.73051	7.9511	-82.3065	6.61244	9.96934	7.42876	8.15074	-96.3998	6.05127	12.481	6.36415	5.62815	-96.0341	3.90495	10.0734
CAMK2N1	Unrelated|ENSG00000162545.6	CAMK2N1	2326	Unknown	10.2365	11.3236	-120.427	8.12513	18.6753	6.59828	6.28075	-115.124	4.51529	10.3131	7.53768	4.64592	-113.003	3.35312	7.56116
MUL1	Unrelated|ENSG00000090432.7	MUL1	2428	Unknown	171.387	1.23813	-124.698	0.797176	2.77078	71.8625	3.13928	-128.761	2.25547	5.16202	143.256	1.31521	-127.892	0.811984	3.4588
PINK1-AS	Unrelated|ENSG00000117242.7	PINK1-AS	4443	Unknown	6.09013	19.0035	-112.24	14.4709	27.6707	6.66113	12.151	-112.69	7.68553	29.0019	7.21298	11.2403	-114.317	7.78577	20.2054
DDOST	Unrelated|ENSG00000244038.11	DDOST	2126	Unknown	69.3818	21.7598	-167.787	17.3188	29.2641	68.0531	14.3216	-170.189	9.62376	27.9803	61.6192	14.2035	-170.648	10.0869	23.997
SH2D5	Unrelated|ENSG00000189410.12	SH2D5	3898	Unknown	0.616181	15.2566	-69.0055	9.55718	37.7969	5.27248	3.59177	-86.7063	2.39935	7.14038	0.905741	3.2546	-61.4993	2.59155	4.37358
HP1BP3	Unrelated|ENSG00000127483.19	HP1BP3	6406	Unknown	89.052	6.72373	-153.45	5.17676	9.58932	61.3418	6.78923	-150.979	4.64413	12.617	103.257	5.87557	-161.499	3.97426	11.2646
EIF4G3	Unrelated|ENSG00000075151.24	EIF4G3	7832	Unknown	34.089	9.97592	-142.168	7.50324	14.8794	11.5384	11.2708	-119.26	7.21332	25.7619	39.6407	5.8318	-138.631	3.99237	10.8144
ECE1	Unrelated|ENSG00000117298.16	ECE1	5099	Unknown	48.5061	9.51681	-143.068	7.60319	12.7177	48.0474	6.89508	-144.423	5.24322	10.0665	62.3949	5.33563	-148.112	3.83667	8.75688
RAP1GAP	Unrelated|ENSG00000076864.21	RAP1GAP	3426	Unknown	24.8994	10.4716	-131.548	8.20197	14.4778	26.5432	8.80194	-140.335	6.09301	15.8478	18.3585	6.78445	-124.182	4.59796	12.9359
USP48	Unrelated|ENSG00000090686.16	USP48	4419	Unknown	15.6415	11.1589	-128.802	8.14395	17.7184	13.1161	6.25224	-116.383	4.18435	12.361	16.971	6.38033	-124.302	4.38952	11.6756
HSPG2	Unrelated|ENSG00000142798.20	HSPG2	14341	Unknown	13.4486	26.3989	-142.259	18.6763	45.0107	5.41009	17.6372	-114.035	11.8425	34.5364	9.76116	10.379	-127.393	7.53887	16.6524
LUZP1	Unrelated|ENSG00000169641.14	LUZP1	8898	Unknown	153.276	1.80216	-131.806	1.30199	2.92635	142.428	2.35492	-140.418	1.63571	4.20293	188.591	1.5678	-138.079	0.993685	3.71307
LINC01355	Unrelated|ENSG00000261326.4	LINC01355	5301	Unknown	8.17515	1.9737	-87.9029	0.994471	128.79	5.69005	1.45466	-61.0732	0.793252	8.75228	10934.5	0.00149315	-89.2759	NA	NA
HNRNPR	Unrelated|ENSG00000125944.21	HNRNPR	7751	Unknown	78.9136	7.95175	-157.269	5.96056	11.9407	48.916	8.42896	-151.218	5.64957	16.5913	85.4094	5.86613	-158.512	4.08424	10.4062
ZNF436	Unrelated|ENSG00000125945.15	ZNF436	4465	Unknown	101.62	1.66131	-120.789	1.16499	2.89443	73.8959	1.71463	-126.468	1.17057	3.20361	116.801	1.33747	-125.34	0.820293	3.61948
TCEA3	Unrelated|ENSG00000204219.11	TCEA3	1719	Unknown	4.01798	16.1889	-101.013	12.1541	24.2339	3.12109	11.41	-113.985	7.00488	30.7431	2.73762	9.99948	-94.3798	6.97012	17.6863
ASAP3	Unrelated|ENSG00000088280.20	ASAP3	4051	Unknown	9.97268	9.90055	-115.529	7.20571	15.8152	6.69566	5.45501	-98.9776	3.86283	9.28007	11.0691	5.45809	-111.765	3.83171	9.48331
E2F2	Unrelated|ENSG00000007968.7	E2F2	5196	Unknown	133.755	1.34859	-144.267	0.581538	Inf	18.87	1.76228	-105.715	1.21464	3.20915	119.433	1.17095	-139.214	0.549564	-8.9599
ID3	Unrelated|ENSG00000117318.9	ID3	950	Unknown	34715.8	0.00730601	-143.578	NA	NA	228.502	1.00516	-138.327	0.511579	28.5705	199.859	1.38318	-147.087	0.694513	164.35
GALE	Unrelated|ENSG00000117308.15	GALE	1516	Unknown	10.8534	15.6858	-130.899	10.9154	27.8631	7.88544	7.93376	-107.413	5.91738	12.0346	8.25888	6.72566	-115.802	5.13292	9.75154
HMGCL	Unrelated|ENSG00000117305.15	HMGCL	1570	Unknown	12.1768	8.01751	-104.313	6.48477	10.4991	7.54579	7.9367	-92.2356	5.75174	12.7986	11.7818	9.16993	-111.831	6.02253	19.2082
FUCA1	Unrelated|ENSG00000179163.12	FUCA1	2043	Unknown	9.7505	11.6339	-116.602	8.6571	17.7308	7.47484	13.1318	-112.386	7.78912	41.8104	10.7644	10.5826	-117.669	6.71012	25.0245
SRSF10	Unrelated|ENSG00000188529.15	SRSF10	7656	Unknown	73.5498	5.15234	-148.52	3.71797	8.38864	53.1366	4.67702	-136.635	3.27967	8.14902	89.6859	3.15434	-148.384	2.23759	5.34367
IL22RA1	Unrelated|ENSG00000142677.4	IL22RA1	2817	Unknown	1.04394	3.98426	-48.283	2.57078	8.8505	1.47863	3.68505	-69.897	2.4612	7.32992	1.2814	3.41608	-63.3984	1.98292	12.3213
IFNLR1	Unrelated|ENSG00000185436.12	IFNLR1	4566	Unknown	11.2875	3.83504	-98.9843	2.66454	6.83955	17.1956	2.40346	-108.505	1.74228	3.87338	16.8269	1.8747	-99.8957	1.31729	3.24985
STPG1	Unrelated|ENSG00000001460.18	STPG1	2804	Unknown	8.2198	4.17378	-89.0174	3.0648	6.54038	9.37792	8.37577	-108.412	5.2985	19.9795	8.17079	3.974	-94.4677	2.43982	10.706
SYF2	Unrelated|ENSG00000117614.10	SYF2	1757	Unknown	14.1964	3.28665	-106.572	2.08354	7.77797	15.6951	4.96101	-103.847	3.34494	9.59839	13.025	4.3582	-100.617	2.93575	8.45477
RSRP1	Unrelated|ENSG00000117616.18	RSRP1	1954	Unknown	139.412	1.01541	-127.597	0.446927	Inf	155.552	1.46697	-132.1	0.828129	6.41783	169.392	1.1237	-127.103	0.544306	-17.4308
AUNIP	Unrelated|ENSG00000127423.11	AUNIP	2161	Unknown	72.6126	1.48571	-120.175	0.861397	5.39806	40.211	2.71426	-115.637	1.95471	4.43923	63.3433	1.35285	-122.826	0.768584	5.64119
PAQR7	Unrelated|ENSG00000182749.6	PAQR7	3023	Unknown	6.46722	5.74821	-95.5844	4.0129	10.1278	19.0882	4.6131	-112.931	3.34721	7.41884	10.1464	2.667	-98.2756	2.03201	3.87923
STMN1	Unrelated|ENSG00000117632.23	STMN1	1712	Unknown	79.6023	10.4848	-163.88	7.86824	15.7087	40.4658	11.1805	-143.649	7.35387	23.31	88.552	8.91013	-168.976	5.88855	18.3008
PAFAH2	Unrelated|ENSG00000158006.14	PAFAH2	3487	Unknown	20.5554	3.52085	-98.8443	2.78251	4.79254	13.615	4.40112	-100.093	3.18954	7.09701	29.7026	1.98132	-102.612	1.39983	3.38923
UBXN11	Unrelated|ENSG00000158062.21	UBXN11	2254	Unknown	3.66832	12.1162	-87.7552	9.5788	16.4824	4.63646	10.221	-95.6229	7.2871	17.1096	2.50155	11.7347	-90.4611	7.44977	27.6229
CRYBG2	Unrelated|ENSG00000176092.17	CRYBG2	6259	Unknown	1.25014	7.36538	-62.2832	5.13242	13.0377	3.39313	3.87093	-77.3779	3.09618	5.16283	0.755893	8.37675	-60.6828	4.82971	31.5415
GPN2	Unrelated|ENSG00000142751.15	GPN2	4665	Unknown	66.8915	3.02024	-116.788	2.49728	3.82024	46.4157	3.5846	-123.5	2.61127	5.71473	68.6787	2.63902	-129.175	1.91285	4.25388
GPATCH3	Unrelated|ENSG00000198746.13	GPATCH3	2125	Unknown	70.871	1.24876	-101.907	0.828536	2.53392	56.3325	2.78558	-120.465	2.03114	4.43166	64.7094	1.52639	-112.995	1.00479	3.17408
KDF1	Unrelated|ENSG00000175707.10	KDF1	1855	Unknown	86.0723	1.78645	-117.958	1.28486	2.93043	47.4753	3.13915	-118.008	2.34736	4.73701	78.1952	1.68123	-123.828	1.09907	3.57472
TENT5B	Unrelated|ENSG00000158246.8	TENT5B	2382	Unknown	17.4509	1.91135	-90.8631	1.23185	4.26274	22.0301	2.31131	-100.206	1.618	4.0443	20.6336	1.36804	-89.4517	0.796848	4.83097
SLC9A1	Unrelated|ENSG00000090020.11	SLC9A1	4737	Unknown	139.567	6.29561	-156.562	5.11033	8.19675	192.386	5.89608	-167.743	4.33293	9.22357	174.071	3.5327	-160.424	2.60785	5.47401
MAP3K6	Unrelated|ENSG00000142733.18	MAP3K6	4438	Unknown	17.1499	10.3502	-122.395	8.10233	14.3244	33.1051	7.17566	-139.808	5.05159	12.382	23.0516	6.91556	-130.962	4.91279	11.6751
WASF2	Unrelated|ENSG00000158195.11	WASF2	5681	Unknown	402.453	5.47424	-175.215	4.556	6.85604	312.622	6.21435	-181.336	4.6022	9.56496	389.572	4.49998	-183.266	3.1733	7.73297
AHDC1	Unrelated|ENSG00000126705.15	AHDC1	6438	Unknown	158.649	2.48962	-148.658	1.73088	4.43269	182.363	3.08601	-157.473	2.24757	4.92218	176.396	1.57298	-139.228	1.08128	2.88483
LINC02574	Unrelated|ENSG00000233975.2	LINC02574	1663	Unknown	0.826313	13.7655	-73.8977	8.64833	33.7138	7.10964	69.3147	-110.686	11.3024	-16.7721	2.96072	33.0334	-100.02	10.2448	-26.9794
IFI6	Unrelated|ENSG00000126709.16	IFI6	911	Unknown	2.39337	13.8209	-95.7136	9.18109	27.9415	16.8888	69.3147	-130.602	13.9316	-23.2963	6.61326	42.2551	-117.531	14.3975	-45.1975
RPA2	Unrelated|ENSG00000117748.10	RPA2	1584	Unknown	62.3361	4.4579	-130.736	3.55903	5.96421	42.3668	5.58417	-126.93	4.00801	9.20341	70.0683	4.13212	-144.284	2.91461	7.09652
EYA3	Unrelated|ENSG00000158161.16	EYA3	5999	Unknown	78.4809	4.91327	-141.95	3.81222	6.90864	61.4951	4.61625	-138.909	3.21369	8.19117	84.2677	3.28533	-143.758	2.2824	5.86056
PTAFR	Unrelated|ENSG00000169403.12	PTAFR	4191	Unknown	5.06164	2.80995	-76.9205	1.7783	6.69244	25.9223	2.87957	-111.725	2.18469	4.22265	7.53923	2.75669	-83.168	1.65479	8.25073
DNAJC8	Unrelated|ENSG00000126698.11	DNAJC8	1763	Unknown	60.7013	10.6651	-156.882	8.07578	15.6983	51.9076	7.16762	-145.618	4.89992	13.3426	62.4332	7.12297	-156.528	5.01722	12.2747
SNHG12	Host|ENSG00000197989.15	SNHG12	1871	Unknown	42.4751	1.83767	-116.011	1.08548	5.98517	59.0365	1.74892	-117.924	0.970786	8.81285	72.077	1.19986	-122.02	0.590251	-36.5776
Pre|SNORD99|snoDB0071	Pre|SNORD99|snoDB0071	Pre|SNORD99|snoDB0071	710	Unknown	142.098	0.141461	-87.5763	NA	NA	193.037	0.115303	-86.377	NA	NA	26.7755	0.800374	-89.7566	0.246423	-0.641345
SNORA61	snoDB0072	SNORA61	130	Unknown	0.129832	69.3147	-77.5904	21.7295	Inf	0.428131	69.3147	-94.7029	12.7704	-20.2215	0.500267	69.3147	-88.1659	12.2541	-18.9568
Post|SNORA44|snoDB0073	Post|SNORA44|snoDB0073	Post|SNORA44|snoDB0073	399	Unknown	3.0414	3.188	-71.1935	1.94174	8.90077	98.1496	0.128688	-75.158	NA	NA	11.724	0.901792	-77.4756	0.29937	-0.890834
Post|SNORA16A|snoDB0966	Post|SNORA16A|snoDB0966	Post|SNORA16A|snoDB0966	273	Unknown	2.66351	4.31426	-70.8062	2.86811	8.70185	3.42335	3.17442	-75.0987	1.84953	11.1911	2.48968	2.86314	-76.3481	1.66266	10.3
SNHG12.1	OtherIntrons|ENSG00000197989.15	SNHG12.1	860	Unknown	8.75235	2.59113	-89.1547	1.59222	6.95367	12.9691	2.30334	-87.1927	1.40567	6.37349	12.2366	2.00536	-94.84	1.2322	5.38294
TAF12	Unrelated|ENSG00000120656.14	TAF12	2689	Unknown	45.075	5.29953	-130.507	4.11215	7.45099	51.6263	4.32337	-134.732	3.12261	7.02462	46.8505	4.36876	-135.35	3.07522	7.54058
SRSF4	Unrelated|ENSG00000116350.18	SRSF4	2300	Unknown	135.851	2.82292	-145.685	2.05018	4.53054	115.435	3.13291	-144.664	2.34468	4.71947	176.275	1.97713	-148.969	1.33597	3.80157
MECR	Unrelated|ENSG00000116353.16	MECR	2515	Unknown	8.54442	15.8792	-115.845	12.2737	22.4843	4.3154	12.1964	-94.3499	7.43918	33.8297	8.96343	9.90047	-117.121	6.86981	17.716
SDC3	Unrelated|ENSG00000162512.16	SDC3	6392	Unknown	38.0932	8.0073	-133.324	6.38851	10.7249	58.1501	8.11348	-143.782	5.73426	13.8672	49.9129	5.77704	-141.922	4.04866	10.0804
PUM1	Host|ENSG00000134644.16	PUM1	5385	Unknown	337.6	2.29985	-156.823	1.73289	3.41822	252.223	2.96551	-162.372	2.11415	4.96487	390.4	1.76155	-164.412	1.1542	3.71794
Post|SNORD103A|snoDB0977	Post|SNORD103A|snoDB0977	Post|SNORD103A|snoDB0977	2346	Unknown	30.0829	1.00966	-87.1479	0.478578	Inf	26.3917	1.39836	-96.3444	0.852269	3.89237	19.3063	1.29515	-89.9788	0.71667	6.71683
Pre|SNORD103A|snoDB0977	Pre|SNORD103A|snoDB0977	Pre|SNORD103A|snoDB0977	866	Unknown	4.93293	1.47956	-67.4282	0.674078	Inf	4.67307	1.26182	-63.0844	0.625562	-73.7751	6.07787	1.33827	-66.524	0.660436	-50.8165
PUM1.1	OtherIntrons|ENSG00000134644.16	PUM1.1	120567	Unknown	488.641	1.4831	-169.071	0.810833	8.67881	835.548	0.84695	-171.982	0.313167	-1.20226	806.733	0.826188	-169.295	0.31498	-1.32618
Post|SNORD103B|snoDB0978	Post|SNORD103B|snoDB0978	Post|SNORD103B|snoDB0978	3634	Unknown	35.3612	1.18418	-94.146	0.645476	7.15883	43.3021	1.17421	-104.839	0.668301	4.8323	58.1945	0.655615	-100.576	0.156388	-0.299062
Pre|SNORD103B|snoDB0978	Pre|SNORD103B|snoDB0978	Pre|SNORD103B|snoDB0978	921	Unknown	9.85225	1.14075	-73.1678	0.481284	Inf	7.7271	1.44478	-73.985	0.781791	9.50787	7.57198	1.27975	-72.779	0.622931	-23.5244
NKAIN1	Unrelated|ENSG00000084628.10	NKAIN1	2922	Unknown	4.0528	26.6934	-120.232	17.2747	58.6975	2.5037	10.5799	-100.153	7.32171	19.0628	0.86167	9.68759	-93.6923	6.43509	19.588
SNRNP40	Unrelated|ENSG00000060688.13	SNRNP40	1615	Unknown	63.1877	7.03856	-154.832	4.93588	12.2622	47.9872	4.52844	-140.146	3.37969	6.8602	69.0423	3.85169	-149.657	2.7852	6.24172
PEF1	Unrelated|ENSG00000162517.13	PEF1	1614	Unknown	74.6731	6.86561	-144.756	5.52386	9.06829	55.5589	7.04136	-135.334	5.39712	10.1264	76.1263	4.61137	-145.47	3.49569	6.77304
ADGRB2	Unrelated|ENSG00000121753.13	ADGRB2	5708	Unknown	1.71637	11.813	-85.9303	7.68708	25.4994	0.860592	11.0705	-65.1194	6.30533	45.3219	1.24664	10.3303	-80.1862	6.25582	29.6265
SPOCD1	Unrelated|ENSG00000134668.13	SPOCD1	3933	Unknown	0.70763	7.62313	-64.2562	4.22038	39.3487	1.20693	4.85954	-71.5783	3.08056	11.5014	1.1368	8.06586	-67.9465	4.19745	102.893
PTP4A2	Unrelated|ENSG00000184007.22	PTP4A2	3910	Unknown	122.127	9.44741	-172.478	7.03523	14.3768	92.4083	7.42059	-168.018	4.95732	14.7496	127.243	7.01029	-173.182	4.66309	14.1154
TMEM234	Unrelated|ENSG00000160055.20	TMEM234	1411	Unknown	6.58103	5.75376	-93.1338	4.15936	9.33033	9.78259	3.98292	-96.0565	2.97654	6.01745	7.44751	3.30005	-92.4127	2.16217	6.96612
MARCKSL1	Unrelated|ENSG00000175130.7	MARCKSL1	1546	Unknown	146.823	12.3067	-178.166	9.5969	17.1487	213.676	8.13503	-172.997	5.97194	12.755	172.236	7.30413	-177.403	5.43661	11.126
BSDC1	Unrelated|ENSG00000160058.19	BSDC1	4599	Unknown	151.951	3.44772	-139.231	2.87753	4.29972	81.5149	8.51272	-151.689	5.61235	17.6168	143.359	3.82049	-154.08	2.67366	6.6901
ZBTB8OS	Unrelated|ENSG00000176261.16	ZBTB8OS	1567	Unknown	6.00737	11.6314	-103.357	8.8019	17.142	6.24163	10.523	-110.405	6.37914	30.0314	6.21335	8.23591	-104.265	5.67006	15.0435
SYNC	Unrelated|ENSG00000162520.15	SYNC	3503	Unknown	0.957281	4.19388	-63.9891	2.00775	Inf	1.51275	3.77794	-78.4868	2.49062	7.81973	1.5105	4.15539	-65.8164	2.26865	24.6843
YARS1	Unrelated|ENSG00000134684.13	YARS1	2899	Unknown	105.154	11.9447	-177.655	8.55458	19.7854	114.717	7.5068	-167.273	5.5651	11.5295	86.2929	6.25254	-165.594	4.61652	9.68461
TMEM54	Unrelated|ENSG00000121900.19	TMEM54	1030	Unknown	26.3835	19.1581	-144.662	14.994	26.5244	26.7953	13.6369	-144.36	9.62813	23.3655	25.5549	12.0262	-146.404	8.65108	19.7197
RNF19B	Unrelated|ENSG00000116514.17	RNF19B	2677	Unknown	178.688	1.46539	-133.692	0.956337	3.13311	187.395	2.99502	-156.529	2.18834	4.74364	208.997	1.52504	-140.532	0.93207	4.19177
AK2	Unrelated|ENSG00000004455.18	AK2	5970	Unknown	81.0392	12.2841	-165.99	9.38796	17.7644	88.9033	8.08525	-157.746	5.89825	12.8498	80.1118	7.36897	-162.287	5.46978	11.2885
TRIM62	Unrelated|ENSG00000116525.14	TRIM62	3817	Unknown	142.652	2.46766	-132.749	1.96679	3.3108	111.674	4.48307	-144.807	3.26654	7.14345	135.349	2.1325	-139.939	1.39063	4.57101
PHC2	Unrelated|ENSG00000134686.20	PHC2	4255	Unknown	174.748	2.53474	-140.541	1.98608	3.50226	148.242	4.06055	-147.65	3.13037	5.77722	204.188	2.10078	-147.425	1.47374	3.65653
SMIM12	Unrelated|ENSG00000163866.9	SMIM12	5694	Unknown	85.8076	2.67002	-128.197	2.03558	3.879	67.5439	3.39073	-136.689	2.49154	5.30544	96.6537	2.38819	-135.85	1.75268	3.74671
DLGAP3	Unrelated|ENSG00000116544.12	DLGAP3	3921	Unknown	0.664334	13.0217	-57.7093	9.34905	21.447	2.18412	7.27463	-77.932	4.87583	14.3195	1.0135	3.98364	-59.7127	2.9638	6.07355
ENSG00000284773	Unrelated|ENSG00000284773.1	ENSG00000284773	3163	Unknown	1.66437	3.01929	-63.2063	1.58656	31.1413	2.20686	3.07248	-62.5883	1.57159	68.2929	2.24803	4.38249	-74.4033	2.48092	18.7665
TMEM35B	Unrelated|ENSG00000243749.2	TMEM35B	1071	Unknown	5.58034	6.68475	-91.3037	4.915	10.4461	4.92313	8.15441	-90.896	4.9188	23.8296	7.35393	5.2864	-99.4652	3.58572	10.0557
ENSG00000271741	Unrelated|ENSG00000271741.1	ENSG00000271741	3099	Unknown	15.8617	5.53411	-112.66	4.03002	8.82946	15.2882	5.76925	-114.511	3.7395	12.6182	19.9813	4.39026	-117.587	2.98092	8.32732
ZMYM6	Unrelated|ENSG00000163867.17	ZMYM6	5122	Unknown	23.2861	3.97297	-115.499	2.824	6.6982	25.2746	3.56286	-118.75	2.42627	6.70278	25.5143	3.45871	-119.005	2.33261	6.68694
SFPQ	Unrelated|ENSG00000116560.12	SFPQ	4041	Unknown	423.946	6.62374	-196.758	4.77483	10.8093	289.631	5.05337	-179.271	3.57786	8.59998	475.393	4.08348	-195.502	2.82949	7.33361
KIAA0319L	Unrelated|ENSG00000142687.19	KIAA0319L	4777	Unknown	50.3652	8.78026	-139.72	7.14879	11.3766	33.8471	7.1469	-135.636	5.15587	11.6431	46.6829	6.98902	-143.701	4.8342	12.6098
PSMB2	Host|ENSG00000126067.12	PSMB2	4426	Unknown	96.1751	12.1576	-171.567	9.13439	18.1721	81.7879	9.86395	-161.12	6.76337	18.2139	103.426	8.00705	-170.099	5.57621	14.1951
PSMB2.1	OtherIntrons|ENSG00000126067.12	PSMB2.1	15695	Unknown	74.401	0.738855	-102.724	0.219807	Inf	104.217	0.562054	-112.415	0.0732571	-0.0990866	52.1364	1.0777	-107.168	0.513591	-10.9564
Post||snoDB1553	Post||snoDB1553	Post||snoDB1553	7672	Unknown	7.58079	2.38137	-84.0603	1.42984	7.11873	21.0729	0.910424	-85.8614	0.341605	-1.36878	23.0991	0.749451	-90.5424	0.181581	-0.352292
Pre||snoDB1553	Pre||snoDB1553	Pre||snoDB1553	13942	Unknown	311.316	0.146578	-106.565	9.49619e-07	Inf	40302.2	0.00115805	-110.464	NA	NA	43.5205	0.867306	-106.316	0.315193	-1.15385
C1orf216	Unrelated|ENSG00000142686.8	C1orf216	2628	Unknown	26.7069	4.01233	-121.891	2.75222	7.40083	21.1515	4.72234	-115.437	3.14746	9.45156	40.8313	2.16277	-120.613	1.5602	3.52367
CLSPN	Unrelated|ENSG00000092853.14	CLSPN	8512	Unknown	82.6417	3.33768	-148.55	2.14051	7.5734	44.4973	4.15661	-134.197	2.81777	7.91946	93.1232	2.49878	-145.187	1.58728	5.86924
TRAPPC3	Unrelated|ENSG00000054116.12	TRAPPC3	1336	Unknown	50.4503	6.46999	-139.438	4.95473	9.32036	35.449	7.85087	-133.688	5.24903	15.5673	59.8913	4.74549	-142.183	3.39203	7.89612
EVA1B	Unrelated|ENSG00000142694.7	EVA1B	1054	Unknown	4.923	8.28534	-97.4356	5.81518	14.4037	13.1988	12.9178	-115.798	8.40874	27.8538	5.8775	12.3242	-106.214	7.05844	48.526
STK40	Unrelated|ENSG00000196182.11	STK40	4837	Unknown	198.074	2.48068	-147.578	1.85467	3.74459	191.775	4.05091	-155.086	3.08835	5.88515	180.671	2.16784	-151.944	1.48365	4.02318
LSM10	Unrelated|ENSG00000181817.6	LSM10	860	Unknown	35.5144	6.6476	-132.684	5.03961	9.76253	39.6094	5.85629	-131.154	4.42732	8.64732	37.726	3.91822	-128.634	2.96746	5.76542
OSCP1	Host|ENSG00000116885.18	OSCP1	1463	Unknown	4.08251	5.26633	-84.9263	3.55758	10.1336	6.70273	5.08506	-92.475	3.50924	9.22965	3.12789	7.81656	-85.2953	4.72493	22.6123
OSCP1.1	OtherIntrons|ENSG00000116885.18	OSCP1.1	30356	Unknown	3.66623	3.11233	-78.6157	1.78031	12.3599	16.6079	1.0453	-78.5753	0.503066	-13.4269	4.65715	2.52871	-71.808	1.47201	8.96292
MRPS15	Unrelated|ENSG00000116898.12	MRPS15	953	Unknown	25.1097	17.819	-150.503	12.8167	29.2255	24.5779	12.4345	-150.142	7.95402	28.4732	21.809	9.91986	-148.356	6.85678	17.9293
ZC3H12A-DT	Unrelated|ENSG00000233621.3	ZC3H12A-DT	1423	Unknown	6.83692	3.9265	-88.3728	2.70137	7.1851	5.32043	8.84845	-92.8926	5.46755	23.1853	4.59826	5.78388	-83.9624	3.39493	19.5189
MEAF6	Unrelated|ENSG00000163875.16	MEAF6	4702	Unknown	56.8703	5.51234	-135.243	4.34791	7.52861	47.5891	6.71966	-138.636	4.78506	11.2803	58.4328	4.44241	-141.519	3.13449	7.62339
SNIP1	Unrelated|ENSG00000163877.11	SNIP1	4554	Unknown	9121.08	0.0226399	-130.994	NA	NA	175.345	1.36754	-129.815	0.871074	3.17989	268.544	0.844043	-136.815	0.312662	-1.20657
GNL2	Unrelated|ENSG00000134697.13	GNL2	2350	Unknown	62.3783	3.52385	-132.983	2.58676	5.52558	76.2386	5.00307	-147.445	3.49639	8.79156	67.1613	3.13624	-135.036	2.33007	4.79539
C1orf109	Unrelated|ENSG00000116922.15	C1orf109	2696	Unknown	75.3764	1.41676	-111.632	0.919768	3.08227	50.8786	2.62576	-118.874	1.90921	4.20334	76.6445	1.39261	-119.353	0.850434	3.84199
EPHA10	Unrelated|ENSG00000183317.17	EPHA10	5477	Unknown	7.42846	7.4103	-86.6379	6.17137	9.27161	3.21764	15.1624	-85.165	9.16747	43.8144	7.3678	6.90102	-100.366	4.72897	12.7633
YRDC	Unrelated|ENSG00000196449.4	YRDC	1848	Unknown	134.454	1.45357	-138.02	0.780969	10.4754	88.9601	2.99684	-138.041	2.18932	4.74815	108.421	1.62966	-139.03	0.954024	5.5849
MTF1	Unrelated|ENSG00000188786.10	MTF1	7937	Unknown	358.778	1.24908	-147.596	0.747131	3.80628	247.835	2.66639	-160.217	1.85979	4.70849	390.553	1.21596	-154.625	0.668119	6.75466
INPP5B	Unrelated|ENSG00000204084.13	INPP5B	4694	Unknown	38.5939	4.96726	-123.007	3.93063	6.74652	40.5013	3.97858	-125.264	2.95295	6.09581	43.5491	3.57852	-129.583	2.45202	6.61973
SF3A3	Unrelated|ENSG00000183431.12	SF3A3	2774	Unknown	80.5862	9.13344	-160.472	6.88961	13.5447	73.7092	6.74219	-159.688	4.73726	11.6894	90.9541	5.76913	-162.576	4.17378	9.33863
FHL3	Unrelated|ENSG00000183386.10	FHL3	1656	Unknown	3.03175	8.91814	-89.5275	6.10378	16.5483	6.31105	4.47907	-94.0218	3.33554	6.81572	4.72031	3.12869	-88.9809	2.34519	4.69835
RRAGC	Unrelated|ENSG00000116954.8	RRAGC	2681	Unknown	76.6456	3.16937	-135.041	2.31861	5.00631	78.1035	4.83489	-146.254	3.28729	9.13595	85.2447	2.8647	-139.179	1.91396	5.69235
ENSG00000273637	Unrelated|ENSG00000273637.1	ENSG00000273637	2171	Unknown	41.3684	3.78742	-124.066	2.81431	5.78916	37.4881	5.97427	-134.133	3.93231	12.4276	40.7144	3.67942	-128.835	2.46297	7.27011
MYCBP	Unrelated|ENSG00000214114.9	MYCBP	2532	Unknown	18.8123	10.5894	-129.238	7.96704	15.785	14.9176	9.94292	-123.443	6.50495	21.0886	14.384	9.05377	-130.213	5.8995	19.4565
ENSG00000274944	Unrelated|ENSG00000274944.4	ENSG00000274944	609	Unknown	4.85444	10.3294	-97.1831	7.68872	15.7329	3.53024	12.4125	-94.5636	7.77583	30.7467	4.11015	9.77203	-101.115	6.19768	23.0866
PPIEL	Unrelated|ENSG00000243970.5	PPIEL	2757	Unknown	14.4128	0.618954	-77.0927	0.0643553	Inf	1268.5	0.00613214	-70.969	NA	NA	6.68091	1.58067	-77.281	0.792763	258.159
PABPC4	Host|ENSG00000090621.15	PABPC4	3142	Unknown	149.076	13.0521	-179.837	10.1705	18.2119	142.53	8.69487	-170.387	6.00449	15.7533	143.602	8.48498	-180.634	5.9796	14.6038
PABPC4.1	OtherIntrons|ENSG00000090621.15	PABPC4.1	10596	Unknown	3773.41	0.0267725	-121.89	NA	NA	781.542	0.116085	-119.406	NA	NA	182.355	0.53842	-121.85	0.0738322	-0.101733
Post|SNORA55|snoDB0055	Post|SNORA55|snoDB0055	Post|SNORA55|snoDB0055	1995	Unknown	1235	0.0306819	-101.419	NA	NA	52.6057	0.895282	-105.782	0.362891	-1.91675	20.7202	1.69714	-101.835	1.05122	4.40176
HEYL	Unrelated|ENSG00000163909.8	HEYL	4077	Unknown	17.1015	2.74218	-97.839	1.92452	4.76783	28.2553	4.88388	-122.748	3.24212	9.8941	29.7146	2.31415	-110.322	1.54785	4.58315
BMP8B	Unrelated|ENSG00000116985.12	BMP8B	4826	Unknown	21.2492	4.7968	-107.046	3.82077	6.44258	18.8022	9.06121	-119.577	6.08792	17.7112	25.6185	3.86849	-117.132	2.72482	6.66661
TRIT1	Unrelated|ENSG00000043514.17	TRIT1	5051	Unknown	14.3316	6.64563	-110.506	5.05808	9.68561	16.6085	4.69338	-116.937	3.21193	8.71133	17.4275	3.72333	-112.836	2.62702	6.39
MYCL	Unrelated|ENSG00000116990.11	MYCL	3522	Unknown	50.446	1.09392	-103.307	0.534828	Inf	25.7429	2.05448	-103.94	1.38431	3.98243	29.7625	2.0896	-109.578	1.29425	5.42086
PPT1	Unrelated|ENSG00000131238.18	PPT1	2388	Unknown	154.628	19.2119	-197.223	13.5046	33.2741	89.0151	9.65691	-181.844	6.64022	17.6966	139.933	9.51555	-190.659	6.74304	16.16
COL9A2	Unrelated|ENSG00000049089.15	COL9A2	2852	Unknown	1.37176	23.8362	-94.3706	15.0909	56.686	0.163534	12.6353	-63.3465	8.38889	25.5872	0.53972	9.18429	-81.3056	6.05749	18.9831
RIMS3	Unrelated|ENSG00000117016.10	RIMS3	7259	Unknown	9.31266	11.3857	-106.201	9.19664	14.9424	12.9436	7.54823	-113.039	5.46219	12.2121	9.75576	8.12273	-114.792	5.41184	16.2754
SCMH1	Unrelated|ENSG00000010803.17	SCMH1	3370	Unknown	19.4232	10.4151	-124.608	8.2201	14.2096	7.87026	16.7156	-109.171	10.3587	43.2682	19.5265	6.45205	-127.548	4.50247	11.3793
HIVEP3	Unrelated|ENSG00000127124.16	HIVEP3	12617	Unknown	29.4674	14.4287	-147.12	10.7873	21.7811	21.8946	13.0911	-140.886	8.48633	28.6213	17.6878	8.28776	-131.594	5.41098	17.6959
FOXJ3	Unrelated|ENSG00000198815.9	FOXJ3	5352	Unknown	271.509	2.26984	-154.496	1.64845	3.64311	127.856	4.34109	-152.335	2.96317	8.11445	245.615	1.79938	-153.45	1.12862	4.43547
P3H1	Host|ENSG00000117385.16	P3H1	2993	Unknown	11.3828	9.86058	-100.791	8.37059	11.9959	14.5936	12.5583	-113.409	8.56953	23.4936	12.239	8.59779	-114.578	5.92368	15.673
P3H1.1	OtherIntrons|ENSG00000117385.16	P3H1.1	15132	Unknown	5.52789	3.79992	-75.7926	2.8254	5.80065	15.2383	1.67398	-92.4361	0.779355	-11.3179	6.32586	3.33695	-87.0615	2.13987	7.57387
SVBP	Unrelated|ENSG00000177868.12	SVBP	807	Unknown	4.91139	5.16065	-87.3602	3.55637	9.40187	5.95043	8.07388	-98.1987	5.09537	19.4341	4.95453	5.67813	-95.4893	3.43716	16.3156
SLC2A1	Unrelated|ENSG00000117394.24	SLC2A1	3384	Unknown	305.08	3.78834	-174.58	2.73603	6.15601	324.624	3.33842	-168.29	2.62181	4.59412	291.728	2.23404	-162.522	1.62185	3.58861
EBNA1BP2	Unrelated|ENSG00000117395.13	EBNA1BP2	1503	Unknown	33.5356	14.4406	-152.468	10.5375	22.9362	44.2051	9.75649	-152.517	6.57143	18.9329	31.6711	8.82776	-147.492	6.37123	14.3673
C1orf210	Unrelated|ENSG00000253313.6	C1orf210	1486	Unknown	12.2827	6.46429	-106.225	4.91556	9.43785	12.2478	4.10416	-98.222	3.04447	6.29543	13.1358	4.55304	-104.23	3.2618	7.53652
ELOVL1	Unrelated|ENSG00000066322.15	ELOVL1	1625	Unknown	98.1089	7.50671	-148.238	6.27967	9.32975	109.204	9.20292	-156.953	6.58251	15.2895	100.872	6.29522	-157.815	4.48967	10.5299
MED8	Unrelated|ENSG00000159479.17	MED8	1968	Unknown	53.7172	4.73712	-125.447	3.88156	6.07646	51.8301	5.81978	-135.988	4.16927	9.63337	60.0771	3.41429	-134.114	2.48925	5.43344
HYI	Unrelated|ENSG00000178922.18	HYI	1322	Unknown	1.32018	29.3747	-90.649	20.0106	55.2111	2.02608	17.8568	-94.8288	10.732	53.1255	1.33937	10.6774	-96.9337	7.18095	20.8096
KDM4A-AS1	Unrelated|ENSG00000236200.7	KDM4A-AS1	3391	Unknown	7.05048	2.22468	-81.4263	1.29807	7.77421	3.94468	2.75137	-71.3588	1.83479	5.49788	4.56816	2.37457	-71.0358	1.65653	4.19134
LINC02918	Unrelated|ENSG00000237950.3	LINC02918	2224	Unknown	2.71248	3.04484	-54.1676	2.21288	4.87927	10.0157	1.14439	-68.6552	0.572855	496.238	4.5708	1.83183	-65.7823	1.08469	5.88638
SLC6A9	Unrelated|ENSG00000196517.13	SLC6A9	3206	Unknown	11.87	10.7095	-123.585	7.60712	18.0853	9.13147	3.62792	-112.829	2.6933	5.55589	13.9287	4.08212	-110.386	3.21797	5.58076
ERI3	Host|ENSG00000117419.16	ERI3	1733	Unknown	21.0692	15.4	-135.409	12.074	21.255	21.6909	9.75643	-130.973	7.28132	14.7808	18.9635	9.40451	-131.139	6.98255	14.3989
ERI3.1	OtherIntrons|ENSG00000117419.16	ERI3.1	95659	Unknown	253.801	1.09664	-142.171	0.53655	Inf	2441.45	0.122775	-152.149	NA	NA	2532.67	0.11145	-148.047	NA	NA
Post|SNORA110|snoDB0980	Post|SNORA110|snoDB0980	Post|SNORA110|snoDB0980	4305	Unknown	5.9298	1.27607	-64.007	0.582911	Inf	6031.17	0.00135359	-65.3811	NA	NA	4.96855	1.15311	-67.7272	0.527164	-6.15382
Pre|SNORA110|snoDB0980	Pre|SNORA110|snoDB0980	Pre|SNORA110|snoDB0980	32275	Unknown	66.5775	1.00125	-104.967	0.481609	Inf	547.627	0.137824	-120.363	NA	NA	538.438	0.129448	-117.459	NA	NA
TMEM53	Host|ENSG00000126106.14	TMEM53	2236	Unknown	7.67405	4.60477	-83.909	3.59291	6.40998	5.6993	6.99377	-90.0678	4.85042	12.5311	6.4078	5.17872	-91.142	3.37628	11.1097
TMEM53.1	OtherIntrons|ENSG00000126106.14	TMEM53.1	23611	Unknown	16.7048	2.11693	-94.9981	1.344	4.98209	15.4122	2.96021	-96.4479	2.09776	5.02691	14.6824	2.50135	-92.728	1.66035	5.0688
Post|SNORD145|snoDB0981	Post|SNORD145|snoDB0981	Post|SNORD145|snoDB0981	10661	Unknown	4.56768	2.12204	-63.1998	1.36298	4.78915	8.45012	1.28276	-79.1533	0.594966	-8.22198	6.38778	1.28849	-70.9634	0.580716	-5.88898
Pre|SNORD145|snoDB0981	Pre|SNORD145|snoDB0981	Pre|SNORD145|snoDB0981	3274	Unknown	3.33813	2.5147	-63.6914	1.57626	6.21467	6.84213	2.65998	-82.0703	1.72579	5.79915	3.5391	1.73359	-66.686	0.915987	16.1397
PTCH2	Unrelated|ENSG00000117425.14	PTCH2	4410	Unknown	0.682725	59.6585	-110.998	21.9318	Inf	1.12675	69.3147	-131.562	11.8492	-18.0051	1.04455	69.3147	-115.121	15.6606	-28.5708
EIF2B3	Unrelated|ENSG00000070785.17	EIF2B3	1923	Unknown	18.4151	11.529	-132.828	8.47168	18.039	14.912	8.07501	-124.191	5.60152	14.4603	14.1137	6.06742	-123.294	4.29935	10.3054
HECTD3	Unrelated|ENSG00000126107.15	HECTD3	3597	Unknown	50.4732	8.07529	-136.638	6.63158	10.3225	48.9713	8.50188	-140.55	6.03921	14.356	53.1846	6.25649	-145.994	4.30352	11.4547
ZSWIM5	Unrelated|ENSG00000162415.7	ZSWIM5	5868	Unknown	55.5281	3.41514	-124.011	2.64536	4.81678	20.5826	13.272	-115.462	8.14442	35.83	49.7568	3.84285	-130.872	2.46571	8.7044
MUTYH	Unrelated|ENSG00000132781.20	MUTYH	1891	Unknown	9.82118	7.01924	-98.491	5.55858	9.52118	5.55949	8.31909	-92.4429	5.68837	15.4766	10.3425	6.43742	-109.333	4.47396	11.4721
ENSG00000288208	Host|ENSG00000288208.1	ENSG00000288208	2768	Unknown	15.073	5.67428	-100.71	4.60299	7.39551	7.92878	6.39672	-96.6666	4.41076	11.6358	16.6722	4.40631	-109.415	3.17405	7.20251
ENSG00000288208.1	OtherIntrons|ENSG00000288208.1	ENSG00000288208.1	128664	Unknown	100.778	2.89168	-143.417	1.99812	5.231	125.23	1.32214	-135.678	0.753837	5.37193	142.8	1.65825	-145.204	0.99134	5.0671
TESK2	Host|ENSG00000070759.17	TESK2	3071	Unknown	36.1788	3.82965	-119.078	2.90773	5.60756	15.3281	4.18469	-101.417	2.96585	7.10423	39.4119	2.20448	-113.034	1.52526	3.97427
TESK2.1	OtherIntrons|ENSG00000070759.17	TESK2.1	113748	Unknown	62.9686	2.93074	-137.018	1.9054	6.34526	116.352	0.933245	-129.271	0.38423	-2.17604	99.2544	1.61181	-139.545	0.893166	8.24892
Pre|snoU13|snoDB1923	Pre|snoU13|snoDB1923	Pre|snoU13|snoDB1923	27163	Unknown	22.1621	2.65389	-111.207	1.65878	6.63325	25.1655	1.29763	-102.248	0.644219	-90.8999	33.83	1.40783	-108.283	0.741422	13.9154
CCDC163	Unrelated|ENSG00000280670.3	CCDC163	2095	Unknown	6.01249	4.23242	-81.2611	3.12909	6.53759	8.79929	3.56067	-83.9874	2.6618	5.37614	8.4032	3.81471	-89.7427	2.65912	6.74664
PRDX1	Unrelated|ENSG00000117450.15	PRDX1	1296	Unknown	225.631	16.7059	-198.443	12.5152	25.1159	211.579	12.5962	-193.957	8.21323	27.01	199.433	11.5919	-196.058	7.9199	21.6123
GPBP1L1	Host|ENSG00000159592.11	GPBP1L1	3641	Unknown	154.879	4.76643	-155.571	3.76356	6.49793	112.859	6.72641	-160.068	4.48914	13.4092	182.986	3.5666	-163.139	2.52256	6.08508
GPBP1L1.1	OtherIntrons|ENSG00000159592.11	GPBP1L1.1	54593	Unknown	200.558	1.05088	-139.491	0.452871	Inf	196.862	1.19929	-146	0.616265	22.2366	238.59	0.873	-143.514	0.338325	-1.50424
IPP	Unrelated|ENSG00000197429.11	IPP	3117	Unknown	25.8603	4.31737	-117.077	3.18218	6.71161	21.963	3.95618	-109.199	2.80663	6.70063	31.2693	3.71238	-123.845	2.45105	7.64824
PIK3R3	Host|ENSG00000117461.15	PIK3R3	5596	Unknown	357.884	3.0495	-176.068	2.09325	5.61419	310.46	3.46967	-171.283	2.29981	7.06189	327.361	2.90829	-173.307	1.83421	7.01781
P3R3URF-PIK3R3	Host|ENSG00000278139.1	P3R3URF-PIK3R3	1553	Unknown	116.012	3.33402	-152.436	2.26944	6.2799	97.5795	4.03985	-148.184	2.6146	8.88096	102.928	3.12354	-148.334	1.95448	7.77274
PIK3R3.1	OtherIntrons|ENSG00000117461.15	PIK3R3.1	78552	Unknown	253.554	2.07496	-162.351	1.2588	5.90079	7343.36	0.126536	-181.326	NA	NA	319.094	1.47748	-161.843	0.807805	8.64049
P3R3URF-PIK3R3.1	OtherIntrons|ENSG00000278139.1	P3R3URF-PIK3R3.1	122106	Unknown	261.657	2.09753	-163.238	1.27859	5.83461	6587.5	0.146188	-181.838	NA	NA	320.989	1.52684	-162.614	0.848412	7.6208
Pre||snoDB1552	Pre||snoDB1552	Pre||snoDB1552	7731	Unknown	15.6019	1.76155	-94.8793	0.954996	11.3329	74.3344	0.555445	-106.022	0.0729984	-0.0990273	15.7555	1.52371	-96.9362	0.755351	-88.4824
POMGNT1	Unrelated|ENSG00000085998.15	POMGNT1	2934	Unknown	32.769	11.1528	-136.252	8.98589	14.6969	47.1353	8.79755	-146.842	6.46419	13.767	43.0769	7.99994	-144.311	5.88561	12.485
LRRC41	Unrelated|ENSG00000132128.18	LRRC41	4136	Unknown	63.2656	8.79758	-150.723	6.83686	12.3351	102.048	7.09766	-160.756	5.0913	11.7138	85.5893	4.96177	-156.309	3.63673	7.80578
MKNK1	Unrelated|ENSG00000079277.22	MKNK1	2809	Unknown	28.7213	6.20472	-124.122	4.7876	8.8135	21.8717	7.158	-120.19	5.01981	12.4693	27.2416	4.90734	-124.681	3.35327	9.14614
MOB3C	Unrelated|ENSG00000142961.16	MOB3C	5725	Unknown	23.6295	2.56459	-105.074	1.75886	4.73254	41.5582	3.17124	-124.797	2.19553	5.70786	30.005	2.6495	-114.383	1.71783	5.78933
ATPAF1	Unrelated|ENSG00000123472.13	ATPAF1	4158	Unknown	34.3683	9.95982	-138.296	7.78953	13.8066	25.7063	10.8728	-133.833	7.28839	21.3949	32.4002	9.31953	-143.499	6.21653	18.6076
EFCAB14	Unrelated|ENSG00000159658.15	EFCAB14	5817	Unknown	131.169	6.15889	-157.283	4.88803	8.32274	135.923	6.24797	-162.515	4.34508	11.1162	129.234	4.4851	-159.845	3.15726	7.74047
STIL	Unrelated|ENSG00000123473.17	STIL	5351	Unknown	152.057	2.98792	-154.697	2.05563	5.46764	24.9943	6.21548	-126.848	4.13561	12.5039	163.399	2.21974	-152.656	1.45888	4.63934
FAF1	Unrelated|ENSG00000185104.21	FAF1	6821	Unknown	54.3719	10.5694	-154.618	7.95589	15.7398	17.3707	11.1766	-121.721	7.74431	20.0727	37.2373	6.07457	-137.423	4.37944	9.91067
TTC39A	Unrelated|ENSG00000085831.16	TTC39A	6287	Unknown	64.5325	13.8938	-164.595	10.4529	20.7117	30.9249	8.33937	-146.276	5.90474	14.1903	52.1999	7.35883	-155.897	5.17183	12.7507
EPS15	Unrelated|ENSG00000085832.17	EPS15	5163	Unknown	58.2593	10.2756	-157.388	7.59241	15.8919	27.7538	8.87	-139.484	5.86246	18.2141	51.8211	6.84294	-153.56	4.55717	13.7292
NRDC	Unrelated|ENSG00000078618.23	NRDC	3895	Unknown	51.6729	15.9939	-167.632	11.2791	27.4815	39.6321	9.99658	-161.036	6.56386	20.9561	46.1923	8.95287	-160.722	6.23736	15.8559
RAB3B	Unrelated|ENSG00000169213.7	RAB3B	12780	Unknown	2.7918	16.1551	-99.7641	11.1091	29.6006	2.63639	8.05163	-106.589	5.49395	15.0651	3.11384	6.73103	-105.596	4.50769	13.2823
TXNDC12	Unrelated|ENSG00000117862.13	TXNDC12	1416	Unknown	31.9075	9.68611	-137.607	7.45328	13.8289	25.9123	9.94397	-130.513	6.82203	18.3342	34.9604	8.55803	-143.843	5.593	18.2137
ENSG00000285839	Unrelated|ENSG00000285839.1	ENSG00000285839	1986	Unknown	33.705	8.44549	-133.655	6.62237	11.6537	30.1785	7.92737	-129.291	5.61654	13.4689	36.1396	7.37395	-141.235	4.9431	14.509
CC2D1B	Unrelated|ENSG00000154222.15	CC2D1B	5642	Unknown	43.9966	6.57298	-135.191	5.09858	9.24701	54.8836	5.09744	-137.325	3.80003	7.74006	56.812	4.29671	-137.789	3.24074	6.37345
ORC1	Unrelated|ENSG00000085840.13	ORC1	3121	Unknown	91.3452	3.11229	-149.584	1.97246	7.37287	23.9031	3.827	-117.718	2.84844	5.82976	92.2096	2.46112	-147.8	1.58165	5.54362
TUT4	Unrelated|ENSG00000134744.14	TUT4	5858	Unknown	6.30492	6.69545	-97.2904	4.75426	11.3158	6.74394	7.57017	-96.6245	4.53212	22.9634	8.74129	3.82574	-102.753	2.44827	8.74723
COA7	Unrelated|ENSG00000162377.6	COA7	3988	Unknown	114.601	2.40213	-145.689	1.53362	5.53893	122.299	3.09488	-146.992	2.27551	4.83636	136.82	1.74833	-144.254	1.20183	3.20634
ECHDC2	Unrelated|ENSG00000121310.17	ECHDC2	1556	Unknown	4.88913	12.3042	-98.2007	9.44307	17.6529	5.08177	15.0387	-102.494	9.31766	38.9609	3.61146	9.86044	-92.2667	6.56459	19.8026
CZIB	Unrelated|ENSG00000162384.14	CZIB	1102	Unknown	12.1249	10.3006	-111.824	8.21563	13.8036	9.53592	10.2897	-112.987	6.74989	21.6367	14.3062	8.6382	-122.652	5.87738	16.2904
MAGOH	Unrelated|ENSG00000162385.11	MAGOH	656	Unknown	11.7197	7.20724	-105.937	5.57641	10.1862	12.2965	6.71274	-113.865	4.31701	15.0831	10.7234	7.30382	-116.656	4.9475	13.9456
LRP8	Unrelated|ENSG00000157193.18	LRP8	7704	Unknown	74.5998	5.79587	-158.032	3.86002	11.6269	42.679	6.55393	-139.515	4.68423	10.9077	77.8926	2.89316	-146.119	2.12306	4.53992
NDC1	Host|ENSG00000058804.12	NDC1	4552	Unknown	37.9101	11.5348	-155.518	7.94938	21.0118	30.8802	7.1204	-145.899	4.83194	13.5269	40.05	5.92143	-153.13	4.02742	11.1784
NDC1.1	OtherIntrons|ENSG00000058804.12	NDC1.1	63972	Unknown	7313.86	0.019831	-135.357	NA	NA	125.308	1.03197	-131.706	0.486847	-8.6214	234.706	0.601481	-135.008	0.11077	-0.175358
YIPF1	Unrelated|ENSG00000058799.15	YIPF1	1821	Unknown	22.9158	9.57075	-126.315	7.57412	12.9969	27.7824	7.92128	-133.815	5.50933	14.0896	21.3514	7.94109	-129.822	5.21343	16.655
HSPB11	Unrelated|ENSG00000081870.12	HSPB11	894	Unknown	11.3656	10.7769	-123.891	7.54228	18.8691	5.77238	10.6091	-109.3	6.64366	26.3167	11.0131	8.33613	-122.32	5.36533	18.6785
TMEM59	Unrelated|ENSG00000116209.12	TMEM59	6457	Unknown	43.5261	10.6646	-152.012	7.81287	16.7948	44.3929	14.404	-151.399	8.8296	39.0703	48.014	12.8118	-156.878	7.47162	44.9116
ENSG00000256407	Unrelated|ENSG00000256407.2	ENSG00000256407	2542	Unknown	0.9496	9.1792	-62.365	6.28103	17.0432	0.686244	7.60738	-56.6976	4.57319	22.6055	1	6.63133	-64.1127	4.03772	18.5411
CYB5RL	Unrelated|ENSG00000215883.11	CYB5RL	6193	Unknown	14.2624	6.16028	-100.142	5.04507	7.90844	8.27874	6.19043	-100.972	4.36671	10.6299	14.0582	5.45758	-110.825	3.82662	9.51154
SSBP3	Unrelated|ENSG00000157216.16	SSBP3	3276	Unknown	53.4923	6.78637	-136.231	5.4706	8.93549	38.0443	9.11226	-140.661	5.99396	18.9934	51.9803	6.09121	-144.13	4.00831	12.6806
PARS2	Unrelated|ENSG00000162396.6	PARS2	2356	Unknown	87.4303	1.47817	-114.011	1.00518	2.79192	52.7743	1.69152	-106.356	1.21826	2.76602	100.699	1.16309	-120.717	0.669344	4.43334
DHCR24	Unrelated|ENSG00000116133.13	DHCR24	4233	Unknown	491.265	11.994	-201.887	9.73564	15.6166	297.402	8.14761	-191.791	6.02614	12.5743	389.061	8.22978	-198.744	5.839	13.9358
USP24	Unrelated|ENSG00000162402.14	USP24	10800	Unknown	62.4327	8.49827	-156.899	6.11811	13.9096	92.1274	5.27653	-161.212	3.67621	9.3442	80.776	3.97705	-153.406	2.87988	6.42474
ENSG00000284686	Unrelated|ENSG00000284686.1	ENSG00000284686	1675	Unknown	10.4385	1.01371	-63.5392	0.464217	Inf	0.915806	7.85329	-59.5798	3.5478	-36.7723	8.65939	1.28026	-67.723	0.599773	-9.5135
PLPP3	Unrelated|ENSG00000162407.9	PLPP3	3273	Unknown	2645.9	0.0206957	-100.717	NA	NA	15.1179	2.04676	-87.9262	1.20602	6.75752	51.0742	1.22931	-103.005	0.628712	27.4939
OMA1	Unrelated|ENSG00000162600.12	OMA1	1861	Unknown	6.11537	12.933	-109.039	9.47934	20.3458	4.75627	24.8333	-101.635	15.1888	68.0329	7.40744	11.1936	-113.698	6.62212	36.1469
MYSM1	Unrelated|ENSG00000162601.12	MYSM1	7751	Unknown	71.4974	2.09454	-129.834	1.32237	5.03416	101.666	2.10028	-142.519	1.32177	5.11007	88.1793	1.55255	-131.851	0.924347	4.84589
CYP2J2	Unrelated|ENSG00000134716.11	CYP2J2	1879	Unknown	9.06136	11.1794	-114.004	8.31568	17.0514	10.4912	8.66452	-121.315	6.0476	15.2738	5.74487	7.90211	-104.079	5.35426	15.0762
LINC01748	Unrelated|ENSG00000226476.7	LINC01748	6038	Unknown	3.59263	3.01938	-80.4388	1.62534	21.2165	1.5496	3.02165	-57.4831	1.74325	11.3316	2.6995	2.43171	-67.9859	1.34605	12.5705
TM2D1	Unrelated|ENSG00000162604.12	TM2D1	3218	Unknown	9.27576	5.15087	-95.1436	3.86987	7.69956	13.5405	3.94667	-105.973	2.45808	10.0066	9.86896	4.29254	-97.6524	2.9086	8.18889
DOCK7	Unrelated|ENSG00000116641.18	DOCK7	7233	Unknown	34.0933	7.70065	-138.261	5.65529	12.0638	28.4289	6.19637	-133.469	4.18791	11.9066	31.4873	4.71082	-136.779	3.1332	9.4884
ITGB3BP	Unrelated|ENSG00000142856.17	ITGB3BP	1044	Unknown	2.70376	10.2188	-89.1678	7.06619	18.4506	2.46771	7.59306	-81.1463	5.0007	15.7663	2.38135	7.65532	-89.3875	4.74019	19.8829
JAK1	Unrelated|ENSG00000162434.14	JAK1	5258	Unknown	115.624	10.4274	-172.438	7.84732	15.535	120.557	8.09597	-171.273	5.52788	15.1205	103.243	6.77186	-168.346	4.62374	12.6478
DNAI4	Unrelated|ENSG00000152763.17	DNAI4	3817	Unknown	0.381613	13.9316	-57.8703	8.43985	39.8835	0.369674	17.8772	-59.9486	9.17262	350.319	0.200905	28.7734	-49.7556	10.8467	-44.0813
SLC35D1	Unrelated|ENSG00000116704.8	SLC35D1	6193	Unknown	30.8316	4.63845	-120.158	3.52733	6.77146	30.7642	4.43058	-125.659	3.08565	7.85377	39.8085	3.47207	-126.697	2.4337	6.05587
SERBP1	Unrelated|ENSG00000142864.15	SERBP1	6681	Unknown	164.553	10.5228	-182.938	7.7675	16.3073	129.418	8.23956	-177.27	5.65895	15.1469	151.739	6.55446	-179.845	4.70934	10.7768
GNG12	Unrelated|ENSG00000172380.6	GNG12	4395	Unknown	13.292	8.92713	-120.06	6.4925	14.2832	10.0253	9.92727	-117.767	5.61755	42.6411	13.3156	8.69185	-127.658	5.18544	26.8435
DEPDC1	Unrelated|ENSG00000024526.17	DEPDC1	5299	Unknown	64.7167	3.14749	-131.943	2.27191	5.12115	21.917	3.57988	-111.34	2.44466	6.68349	66.8751	2.58692	-133.185	1.71688	5.2447
LRRC40	Unrelated|ENSG00000066557.6	LRRC40	2843	Unknown	10.0883	7.44893	-109.603	5.38648	12.0707	7.91381	4.40194	-102.267	3.04481	7.94172	9.16194	5.10071	-112.332	3.41035	10.1135
ANKRD13C	Host|ENSG00000118454.13	ANKRD13C	5658	Unknown	29.1581	5.32545	-122.188	4.05279	7.76328	37.1261	5.13074	-129.541	3.58648	9.01043	33.0527	4.09519	-123.469	2.87631	7.10675
Post||snoDB1508	Post||snoDB1508	Post||snoDB1508	5354	Unknown	324.219	0.0260117	-76.8277	NA	NA	22.5424	0.554518	-77.6521	0.0483333	-0.058538	101.281	0.127751	-79.0838	NA	NA
ANKRD13C.1	OtherIntrons|ENSG00000118454.13	ANKRD13C.1	82163	Unknown	161.053	1.13566	-133.731	0.551974	Inf	286.681	0.978025	-149.174	0.40345	-2.30583	185.61	1.10491	-139.832	0.532398	-14.6633
PTGER3	Unrelated|ENSG00000050628.21	PTGER3	6982	Unknown	4.85298	8.34609	-101.821	5.51451	17.1546	4.89434	3.57906	-88.3248	2.61636	5.66267	6.13777	2.58405	-77.6609	1.9036	4.02161
ZRANB2	Unrelated|ENSG00000132485.14	ZRANB2	2821	Unknown	57.1741	4.44538	-139.51	3.17947	7.3862	45.7612	5.76617	-133.397	3.7498	12.4735	64.3904	3.6282	-139.071	2.49479	6.64887
NEGR1	Unrelated|ENSG00000172260.15	NEGR1	12613	Unknown	1.73811	11.4573	-86.8363	7.31696	26.3907	1.00909	7.4862	-64.5622	4.74773	17.6894	0.576072	3.57006	-60.2525	2.06277	13.2572
CRYZ	Unrelated|ENSG00000116791.14	CRYZ	2301	Unknown	13.0155	9.76878	-121.582	7.11207	15.5938	18.7641	9.16057	-133.913	5.88122	20.7064	12.797	9.98591	-126.039	6.49437	21.5969
SLC44A5	Unrelated|ENSG00000137968.17	SLC44A5	4406	Unknown	2.19109	7.06781	-75.0036	4.90962	12.6117	1.59597	4.79869	-69.5848	2.78776	17.2205	1.70398	4.7299	-70.8969	2.64687	22.2041
PIGK	Unrelated|ENSG00000142892.15	PIGK	4601	Unknown	6.22714	16.6574	-115.876	11.986	27.2953	5.23999	13.4981	-108.147	8.23357	37.4327	5.99925	9.4428	-115.654	5.9673	22.6133
ZZZ3	Unrelated|ENSG00000036549.13	ZZZ3	6412	Unknown	139.013	2.23059	-142.207	1.53439	4.08331	43.7683	4.16481	-126.115	2.77277	8.36368	125.578	2.14016	-143.446	1.3771	4.79978
USP33	Unrelated|ENSG00000077254.14	USP33	4502	Unknown	33.29	6.52854	-134.337	4.76067	10.385	30.4475	6.81387	-133.395	4.27496	16.7789	36.5204	4.94592	-137.075	3.17872	11.138
FUBP1	Unrelated|ENSG00000162613.17	FUBP1	6714	Unknown	149.348	7.27705	-167.561	5.61392	10.3404	118.938	7.50728	-162.481	5.15538	13.8054	153.142	4.84071	-169.412	3.45874	8.06194
TTLL7	Unrelated|ENSG00000137941.17	TTLL7	7980	Unknown	0.908269	8.96955	-68.8077	5.45093	25.3026	0.533342	17.4221	-61.1253	8.68926	-3474.58	0.967982	6.67876	-63.7115	3.69209	34.9563
GNG5	Unrelated|ENSG00000174021.12	GNG5	3733	Unknown	29.0431	13.2264	-146.05	9.78389	20.4065	36.2863	9.17217	-139.654	6.33422	16.6173	28.1026	9.13233	-142.193	6.26431	16.8442
ENSG00000285851	Unrelated|ENSG00000285851.1	ENSG00000285851	2686	Unknown	13.2622	13.916	-136.279	9.32969	27.3714	14.9356	8.61811	-128.112	5.51142	19.7519	13.0672	8.73241	-130.983	5.44906	21.9713
CTBS	Unrelated|ENSG00000117151.13	CTBS	6571	Unknown	3.88388	10.7921	-100.992	7.27842	20.8642	5.11953	7.09372	-97.2765	4.56004	15.9634	4.40175	11.2655	-102.224	6.03667	84.1854
SSX2IP	Unrelated|ENSG00000117155.17	SSX2IP	5843	Unknown	23.5906	5.16593	-121.847	3.70375	8.53568	13.8828	6.58562	-113.626	4.18077	15.5035	22.8959	2.94912	-117.591	1.97975	5.77857
MCOLN2	Unrelated|ENSG00000153898.13	MCOLN2	3044	Unknown	0.872191	9.02702	-68.7871	5.41388	27.1396	0.584303	8.9667	-64.3182	4.87112	56.3186	0.366746	8.10246	-48.4259	5.6631	14.2335
MCOLN3	Unrelated|ENSG00000055732.13	MCOLN3	2953	Unknown	1.67658	7.40509	-74.3664	4.82804	15.8828	1.51914	12.0055	-64.2055	7.23255	35.302	1.89519	6.62367	-67.7944	3.93381	20.9463
SYDE2	Unrelated|ENSG00000097096.10	SYDE2	6174	Unknown	126.029	2.18133	-139.902	1.48257	4.12591	71.0496	3.33933	-138.422	2.33022	5.89	130.144	1.92641	-142.024	1.19814	4.91214
C1orf52	Unrelated|ENSG00000162642.14	C1orf52	3254	Unknown	39.4154	2.32435	-111.851	1.63328	4.02917	34.45	4.05394	-126.045	2.62363	8.913	35.1222	2.36977	-115.764	1.58542	4.69007
BCL10	Unrelated|ENSG00000142867.14	BCL10	2833	Unknown	199.253	0.860255	-129.291	0.334625	Inf	133.586	1.83824	-138.188	1.20869	3.83645	169.097	1.04202	-133.284	0.467705	-4.57134
DDAH1	Unrelated|ENSG00000153904.21	DDAH1	4022	Unknown	39.5362	4.41055	-126.484	3.29785	6.65643	20.7852	3.67656	-108.723	2.46605	7.22122	38.0016	2.75062	-123.241	1.88566	5.08154
ZNHIT6	Unrelated|ENSG00000117174.11	ZNHIT6	6203	Unknown	37.9111	2.34271	-112.208	1.6257	4.19126	20.387	3.23051	-109.429	2.19459	6.11884	32.1796	2.1547	-117.06	1.43567	4.31655
ODF2L	Unrelated|ENSG00000122417.16	ODF2L	7560	Unknown	7.59276	3.35467	-97.9709	1.93321	12.673	7.49524	7.37757	-101.467	3.8286	101.01	5.5164	5.13575	-94.6103	2.78757	32.5819
SELENOF	Unrelated|ENSG00000183291.18	SELENOF	1542	Unknown	23.3527	11.4564	-141.339	8.13598	19.3559	21.5365	8.31008	-136.896	5.52225	16.7825	22.1033	7.74235	-140.399	5.05076	16.5756
GTF2B	Unrelated|ENSG00000137947.12	GTF2B	1599	Unknown	39.4145	1.66245	-104.623	1.06613	3.77261	6.08787	4.98901	-80.4412	3.15779	11.8759	54.3237	1.43888	-115.49	0.716711	-189.068
KYAT3	Unrelated|ENSG00000137944.18	KYAT3	1868	Unknown	3.97871	10.3193	-94.7963	7.47909	16.6375	4.62113	10.8209	-100.42	5.72593	98.198	6.55263	6.21197	-101.99	4.05226	13.3008
RBMXL1	Unrelated|ENSG00000213516.10	RBMXL1	5084	Unknown	45.4681	2.64441	-111.037	2.04709	3.73396	30.8089	2.68396	-103.738	2.02611	3.9744	60.1814	1.80239	-114.295	1.257	3.18381
GBP2	Unrelated|ENSG00000162645.13	GBP2	4088	Unknown	0.70091	10.9005	-69.7958	6.32856	39.2706	1.17655	7.90107	-71.2688	5.20641	16.3775	0.126523	8.10349	-54.8012	4.79875	26.0284
ZNF644	Unrelated|ENSG00000122482.22	ZNF644	5702	Unknown	99.4712	1.84937	-130.859	1.19846	4.04785	73.0783	2.90735	-135.7	1.86307	6.61537	101.722	1.0687	-122.138	0.484865	-5.23562
TGFBR3	Unrelated|ENSG00000069702.11	TGFBR3	6339	Unknown	2.44334	2.92054	-65.4393	1.71187	9.93566	1.9016	3.53632	-68.8976	2.13711	10.2419	1.79775	2.5772	-65.6537	1.31521	63.7011
GLMN	Unrelated|ENSG00000174842.17	GLMN	2006	Unknown	4.58118	5.42638	-81.3078	3.99878	8.43926	2.89229	5.91338	-74.3717	3.85892	12.6461	4.35264	3.92146	-83.1295	2.62088	7.78435
GFI1	Unrelated|ENSG00000162676.13	GFI1	4554	Unknown	2.25369	4.89388	-73.1194	3.10953	11.4834	2.5772	23.0886	-84.3745	8.53728	-32.7755	3.94539	2.88574	-80.552	1.73141	8.65816
EVI5	Unrelated|ENSG00000067208.16	EVI5	7795	Unknown	19.6982	4.52864	-114.956	3.21817	7.63954	8.4319	12.3764	-104.911	6.88994	60.7584	18.6297	4.38604	-115.471	2.71412	11.4223
DIPK1A	Unrelated|ENSG00000154511.12	DIPK1A	2646	Unknown	4.27057	5.39885	-88.6475	3.54547	11.3123	3.93865	9.39015	-91.6073	5.36987	37.3625	1.55113	6.13884	-73.9563	3.03181	-247.432
TMED5	Unrelated|ENSG00000117500.13	TMED5	5789	Unknown	32.9478	7.2254	-136.953	5.24407	11.6131	27.9495	10.3463	-134.928	5.9152	41.2361	32.8463	6.14341	-137.115	4.00399	13.1924
CCDC18-AS1	Unrelated|ENSG00000223745.8	CCDC18-AS1	3014	Unknown	3.96092	2.82043	-79.8535	1.53855	16.907	13.7305	0.477072	-68.2827	0.0246559	-0.0274982	2.67218	4.53842	-70.5008	2.89197	10.5378
BCAR3	Unrelated|ENSG00000137936.18	BCAR3	3229	Unknown	57.673	3.58406	-142.37	2.28643	8.28744	90.9141	1.92426	-141.264	1.31333	3.5979	71.9391	1.39422	-125.832	0.900491	3.0865
DNTTIP2	Unrelated|ENSG00000067334.14	DNTTIP2	5896	Unknown	77.5744	2.26096	-122.855	1.66827	3.50685	63.9817	2.83137	-130.26	1.94084	5.23201	76.2455	2.02584	-131.166	1.3433	4.11847
GCLM	Unrelated|ENSG00000023909.10	GCLM	4883	Unknown	53.1558	3.79764	-129.236	2.84952	5.69132	27.1574	5.89126	-123.648	3.96271	11.4766	50.6516	3.21752	-128.414	2.26682	5.54169
ARHGAP29	Unrelated|ENSG00000137962.13	ARHGAP29	8952	Unknown	56.3147	2.32548	-123.022	1.5805	4.39894	24.3977	4.95164	-113.815	3.36913	9.33757	67.8879	2.01744	-127.1	1.2242	5.73076
ALG14	Unrelated|ENSG00000172339.10	ALG14	9375	Unknown	1.9279	11.4968	-84.9203	7.82337	21.6738	1.50353	6.22795	-73.2236	3.79878	17.274	1.75651	5.18679	-77.1625	3.50275	9.98948
DPYD	Unrelated|ENSG00000188641.14	DPYD	4423	Unknown	3.94575	6.70401	-79.3672	5.12234	9.69877	3.5123	6.87317	-75.2738	4.53853	14.1542	3.34295	4.3276	-71.9328	2.94067	8.19063
PLPPR5	Unrelated|ENSG00000117598.14	PLPPR5	4267	Unknown	4.22151	4.83942	-80.0938	3.42154	8.26401	2.74626	7.23994	-66.6008	4.58415	17.2111	3.67249	3.23087	-72.0521	2.05922	7.49578
FRRS1	Unrelated|ENSG00000156869.14	FRRS1	6971	Unknown	6.98464	5.82416	-93.3116	4.2843	9.092	8.17024	6.35114	-103.076	4.33201	11.8956	6.5398	4.87084	-93.8274	3.11411	11.1748
SASS6	Host|ENSG00000156876.10	SASS6	3848	Unknown	11.9754	3.13986	-101.601	1.97463	7.66005	10.6005	2.23955	-92.9124	1.44626	4.96035	14.7523	1.9939	-101.067	1.34365	3.8637
SASS6.1	OtherIntrons|ENSG00000156876.10	SASS6.1	43005	Unknown	42.0652	0.907705	-108.968	0.245579	Inf	30.0337	1.28667	-107.602	0.636876	-63.4121	265.28	0.139935	-102.22	NA	NA
DBT	Unrelated|ENSG00000137992.15	DBT	10799	Unknown	17.2159	5.37435	-108.609	4.13651	7.66941	16.408	4.78061	-107.62	3.4155	7.96344	15.3536	5.14803	-115.281	3.41557	10.447
RTCA-AS1	Unrelated|ENSG00000224616.5	RTCA-AS1	7697	Unknown	2.70262	2.33722	-67.5935	1.18768	72.7933	3.08198	2.80756	-70.2249	1.49771	22.3835	2.28096	4.19992	-68.6314	2.16178	73.4314
EXTL2	Unrelated|ENSG00000162694.14	EXTL2	3146	Unknown	5.20107	4.17354	-80.1294	2.992	6.89725	3.517	4.96914	-79.45	3.05209	13.3617	5.29588	3.19254	-85.8627	1.85236	11.5462
DPH5	Unrelated|ENSG00000117543.22	DPH5	1962	Unknown	8.6035	9.1267	-109.147	6.71206	14.2548	6.28169	7.38815	-99.7887	5.07856	13.5506	8.43853	5.328	-105.424	3.80234	8.8984
VAV3	Unrelated|ENSG00000134215.16	VAV3	5025	Unknown	18.92	4.23313	-114.782	2.91375	7.73616	9.48051	2.75477	-99.1001	1.94713	4.70731	24.382	2.04055	-112.512	1.33644	4.31269
SLC25A24	Unrelated|ENSG00000085491.17	SLC25A24	4249	Unknown	47.528	9.35293	-151.354	6.83182	14.823	57.2879	5.82394	-152.961	4.04376	10.4041	45.4119	5.09154	-150.624	3.60402	8.66997
NBPF4	Unrelated|ENSG00000196427.14	NBPF4	3371	Unknown	9.52053	2.95142	-91.0438	1.94279	6.13811	5.02466	2.37235	-70.4671	1.5831	4.73103	14.285	1.74239	-88.8674	1.09112	4.32228
ENSG00000238122	Unrelated|ENSG00000238122.1	ENSG00000238122	2481	Unknown	17.2294	2.37191	-88.3687	1.7537	3.66328	15.379	2.7549	-91.1557	1.94951	4.6942	20.7856	1.57313	-95.4821	1.05408	3.09927
HENMT1	Unrelated|ENSG00000162639.16	HENMT1	1874	Unknown	19.6296	8.97883	-125.471	6.82128	13.1326	27.9661	8.35335	-133.449	5.78332	15.0345	21.9179	5.83009	-128.792	4.09805	10.098
CLCC1	Unrelated|ENSG00000121940.17	CLCC1	9466	Unknown	29.6273	6.45088	-126.616	4.93893	9.29691	25.6466	6.16944	-126.164	4.13325	12.1598	33.5099	4.83956	-133.397	3.37704	8.53659
WDR47	Unrelated|ENSG00000085433.17	WDR47	4240	Unknown	111.89	1.32158	-125.223	0.757042	5.19738	78.1876	2.48959	-126.565	1.68288	4.78178	157.558	1.18887	-131.632	0.584028	-33.3625
TAF13	Unrelated|ENSG00000197780.11	TAF13	2637	Unknown	26.0726	5.74137	-119.788	4.43555	8.13685	28.7561	6.22173	-125.932	4.23739	11.7014	29.9853	4.29893	-125.197	2.93128	8.05905
PSRC1	Unrelated|ENSG00000134222.16	PSRC1	1826	Unknown	58.6924	3.88013	-128.068	3.0314	5.38891	25.101	3.53715	-110.055	2.71107	5.08727	58.5843	2.94326	-132.22	2.08718	4.98994
SORT1	Host|ENSG00000134243.12	SORT1	6993	Unknown	61.3483	16.3743	-168.213	12.088	25.3701	30.3888	11.3905	-150.491	7.4004	24.7178	51.4599	9.48238	-164.929	6.33233	18.8687
SORT1.1	OtherIntrons|ENSG00000134243.12	SORT1.1	81067	Unknown	55.7677	2.27565	-127.057	1.43771	5.45497	64.1756	1.51393	-126.617	0.833851	8.20951	74.3348	1.29727	-127.875	0.658519	43.2152
PSMA5	Unrelated|ENSG00000143106.13	PSMA5	3815	Unknown	46.8819	13.1576	-156.745	9.80541	19.9923	50.7796	8.87448	-154.293	6.07566	16.4543	49.0937	8.1318	-153.768	5.81396	13.523
AMIGO1	Unrelated|ENSG00000181754.7	AMIGO1	5130	Unknown	23.0742	3.67577	-115.928	2.52204	6.77513	12.7629	11.433	-117.532	5.94927	146.097	26.2392	3.36765	-119.473	2.20089	7.1672
GSTM3	Unrelated|ENSG00000134202.12	GSTM3	4122	Unknown	16.7918	20.9683	-140.46	15.5707	32.0933	6.4792	14.7657	-127.382	9.74073	30.4993	8.47751	12.9229	-130.328	8.63001	25.7138
LAMTOR5	Unrelated|ENSG00000134248.14	LAMTOR5	1154	Unknown	27.2601	9.3352	-129.533	7.41093	12.6092	25.2133	12.9917	-128.906	8.37597	28.9388	29.7538	8.47138	-136.646	5.75376	16.0541
LRIF1	Unrelated|ENSG00000121931.16	LRIF1	3313	Unknown	200.641	0.952754	-132.522	0.413918	Inf	68.2163	2.23216	-126.755	1.43692	4.99847	182.71	1.02638	-130.75	0.483214	-8.27307
DRAM2	Unrelated|ENSG00000156171.15	DRAM2	2246	Unknown	6.38795	11.8066	-106.334	8.8266	17.8243	4.50093	11.3498	-102.163	7.16485	27.2891	6.72198	8.43213	-108.178	5.45441	18.57
DENND2D	Unrelated|ENSG00000162777.17	DENND2D	3239	Unknown	23.5298	8.24667	-128.615	6.21296	12.2597	20.8283	5.84018	-126.363	4.06973	10.3371	25.2254	3.96133	-128.565	2.81614	6.67626
OVGP1	Unrelated|ENSG00000085465.13	OVGP1	2196	Unknown	2.16838	4.08048	-68.8491	2.53912	10.3841	0.752771	5.73883	-54.702	3.53298	15.2776	3.06167	2.03949	-62.9732	1.1543	8.74782
ENSG00000243960	Unrelated|ENSG00000243960.1	ENSG00000243960	723	Unknown	6.34485	14.5954	-116.735	10.1496	25.9715	5.83837	7.00808	-102.528	4.77712	13.1486	5.42743	6.33392	-112.448	4.35935	11.5783
WDR77	Unrelated|ENSG00000116455.14	WDR77	2456	Unknown	33.391	15.5087	-157.148	10.8627	27.0989	33.1921	7.47861	-140.233	5.53376	11.5313	28.2257	6.64433	-146.433	4.99121	9.93479
INKA2	Unrelated|ENSG00000197852.12	INKA2	5951	Unknown	35.5625	3.41437	-116.2	2.57062	5.08266	74.3905	2.74472	-132.425	2.10322	3.94927	60.2206	2.16433	-118.033	1.51971	3.75868
ST7L	Unrelated|ENSG00000007341.19	ST7L	4255	Unknown	6.0415	5.12554	-87.1195	3.75323	8.07981	4.06311	8.20603	-92.1257	4.92892	24.4864	5.85644	4.66302	-87.6559	3.30466	7.91746
RHOC	Unrelated|ENSG00000155366.17	RHOC	2199	Unknown	103.25	14.7032	-167.047	12.0743	18.7956	111.688	12.2476	-172.337	8.4848	22.007	84.841	10.781	-170.219	7.71086	17.9136
ENSG00000271810	Unrelated|ENSG00000271810.5	ENSG00000271810	813	Unknown	42.1897	14.5396	-145.734	11.906	18.6694	45.2361	12.1594	-150.732	8.372	22.2046	34.5287	10.6236	-149.389	7.49298	18.2476
PPM1J	Unrelated|ENSG00000155367.16	PPM1J	2474	Unknown	1.21127	15.9523	-70.7111	12.1316	23.286	2.26785	8.16024	-73.3775	5.4777	15.9917	1.03822	12.3988	-73.8143	7.51871	35.3299
SLC16A1	Unrelated|ENSG00000155380.13	SLC16A1	3753	Unknown	30.0106	8.71742	-141.873	6.13071	15.0802	35.2826	5.6071	-134.536	3.88087	10.0993	37.4734	4.66477	-141.257	3.24644	8.28394
PHTF1	Unrelated|ENSG00000116793.16	PHTF1	3657	Unknown	14.1607	7.27388	-111.384	5.59144	10.4046	15.6916	9.77142	-117.49	6.25498	22.3185	15.1072	8.06388	-119.715	4.74861	26.7151
RSBN1	Unrelated|ENSG00000081019.14	RSBN1	6621	Unknown	216.271	1.51982	-142.812	0.95178	3.76961	197.413	2.05636	-146.971	1.37978	4.03484	313.717	1.22776	-148.992	0.670012	7.32718
AP4B1	Unrelated|ENSG00000134262.13	AP4B1	3173	Unknown	105.939	2.65926	-139.907	1.8812	4.53485	53.4217	4.36683	-130.773	3.10384	7.36289	114.473	2.00009	-138.512	1.37635	3.65771
HIPK1-AS1	Unrelated|ENSG00000235527.7	HIPK1-AS1	2117	Unknown	13.2127	1.26211	-76.6311	0.65554	16.8966	15.5503	1.17371	-85.2635	0.613743	13.3944	9.38535	1.59459	-78.2321	0.872192	9.28452
TRIM33	Unrelated|ENSG00000197323.12	TRIM33	8369	Unknown	355.88	3.28733	-173.816	2.38321	5.29678	228.122	4.76384	-172.844	3.13278	9.93794	555.906	2.30806	-181.628	1.55121	4.50713
BCAS2	Unrelated|ENSG00000116752.6	BCAS2	1275	Unknown	138.14	5.67638	-160.468	4.34599	8.18065	161.387	6.63194	-170.203	4.49431	12.6475	148.87	4.91327	-168.474	3.32915	9.37348
DENND2C	Unrelated|ENSG00000175984.15	DENND2C	6177	Unknown	9.95158	3.03458	-105.985	1.60408	28.0429	12.2242	9.86594	-113.164	4.91887	-1720.85	11.4539	4.68443	-98.7902	2.72182	16.7939
NRAS	Unrelated|ENSG00000213281.5	NRAS	4326	Unknown	306.661	8.89891	-194.189	6.55364	13.8582	247.401	8.49159	-189.773	5.60529	17.5057	313.752	7.28932	-196.617	4.77698	15.3759
CSDE1	Unrelated|ENSG00000009307.17	CSDE1	4332	Unknown	858.674	12.8267	-227.428	9.41285	20.126	660.812	10.911	-219.317	7.00757	24.6316	788.16	9.00985	-224.783	6.0761	17.4216
SIKE1	Unrelated|ENSG00000052723.12	SIKE1	5506	Unknown	130.045	5.04142	-157.132	3.82083	7.40794	130.138	4.50903	-158.022	3.10619	8.22259	165.636	3.93256	-164.558	2.75663	6.85815
ATP1A1-AS1	Unrelated|ENSG00000203865.13	ATP1A1-AS1	4746	Unknown	24.5137	2.17789	-111.369	1.25163	8.37772	7.21341	6.47288	-89.7371	3.89074	19.2451	13.8158	4.31457	-105.04	2.41705	20.0728
CD58	Unrelated|ENSG00000116815.16	CD58	1328	Unknown	6.93599	5.77237	-101.545	3.811	11.8934	7.42731	9.8761	-104.406	5.32113	68.5924	5.31324	7.46921	-99.1693	4.05	47.957
IGSF3	Unrelated|ENSG00000143061.18	IGSF3	7326	Unknown	213.236	6.43051	-170.766	5.06918	8.79145	112.677	7.6357	-161.607	5.29719	13.6708	165.666	5.66466	-169.344	3.70325	12.0434
CD101-AS1	Unrelated|ENSG00000236137.1	CD101-AS1	1814	Unknown	2.76818	3.85068	-62.4482	2.77243	6.30138	0.817015	6.43638	-48.8816	3.81753	20.4983	1.76549	4.54404	-62.28	2.64515	16.1066
TRIM45	Unrelated|ENSG00000134253.10	TRIM45	3536	Unknown	24.2031	3.49573	-107.176	2.64493	5.15344	21.1116	3.37859	-112.441	2.52027	5.12345	29.6872	2.77767	-114.249	2.00026	4.54352
GDAP2	Unrelated|ENSG00000196505.11	GDAP2	8819	Unknown	54.7955	4.94243	-138.096	3.66071	7.60522	35.8797	6.46527	-134.041	4.15448	14.5685	58.6222	3.64619	-140.068	2.42457	7.3489
WARS2	Unrelated|ENSG00000116874.12	WARS2	2811	Unknown	13.0006	6.60999	-112.079	4.81957	10.5169	8.14187	7.68428	-105.959	4.76845	19.7784	11.9237	5.29753	-113.821	3.5238	10.6667
ZNF697	Unrelated|ENSG00000143067.5	ZNF697	5579	Unknown	57.7609	0.816063	-98.3675	0.293696	Inf	83.7986	1.14679	-120.124	0.515319	-5.08778	68.8664	0.812822	-103.986	0.270855	-0.812049
REG4	Unrelated|ENSG00000134193.15	REG4	2327	Unknown	0.157533	59.5758	-62.3457	30.0561	3337.71	1.03058	14.9495	-101.378	9.72073	32.3514	0	7.05113	-73.0692	4.90534	12.534
NOTCH2	Unrelated|ENSG00000134250.21	NOTCH2	11425	Unknown	453.406	7.04682	-193.722	5.42155	10.0637	391.799	6.04323	-190.294	4.34355	9.92826	460.032	4.44256	-191.765	3.21031	7.21008
SEC22B	Unrelated|ENSG00000265808.4	SEC22B	6927	Unknown	72.7877	9.04097	-156.269	6.92423	13.0217	41.2016	10.125	-143.683	6.48203	23.1165	73.2696	6.67092	-156.894	4.5794	12.2791
PDE4DIPP2	Unrelated|ENSG00000275131.3	PDE4DIPP2	6897	Unknown	48.4131	2.07922	-107.684	1.54369	3.18371	42.9788	3.855	-113.238	2.88059	5.82563	63.7013	1.8391	-116.171	1.18769	4.07306
H2BP1	Unrelated|ENSG00000223345.5	H2BP1	1828	Unknown	263.898	0.545649	-134.666	0.0513142	Inf	19.1752	1.7473	-93.0004	1.03676	5.55306	2182.89	0.0581091	-132.784	NA	NA
FAM72B	Unrelated|ENSG00000188610.12	FAM72B	2396	Unknown	25.8707	2.118	-101.175	1.43108	4.07307	11.6495	2.80946	-96.2362	1.90902	5.31768	24.9861	2.1589	-105.711	1.40871	4.61838
H2BP2	Unrelated|ENSG00000234571.2	H2BP2	1122	Unknown	16.0128	2.55922	-113.708	1.29805	90.044	3.68819	3.09759	-82.6666	1.68002	19.8286	14.023	2.46018	-109.85	1.30878	20.4587
H3-7	Unrelated|ENSG00000273213.4	H3-7	2616	Unknown	261.443	1.17094	-153.657	0.490684	Inf	40.8558	1.80961	-118.759	1.07761	5.64248	148.319	1.59455	-149.927	0.859261	11.0519
FAM72C	Unrelated|ENSG00000263513.6	FAM72C	2395	Unknown	21.4578	1.81395	-94.5754	1.15181	4.26686	12.3556	2.40299	-88.4693	1.61685	4.67705	28.741	1.43339	-100.762	0.810502	6.19225
NBPF15	Unrelated|ENSG00000266338.7	NBPF15	4862	Unknown	48.7581	5.22586	-135.288	3.92779	7.80541	45.9539	7.01146	-141.076	4.68614	13.9175	62.6982	3.86466	-142.129	2.61443	7.40648
SRGAP2B	Host|ENSG00000196369.12	SRGAP2B	7120	Unknown	86.2182	3.04556	-123.037	2.5202	3.84763	17.4385	8.92371	-107.528	5.8434	18.8719	76.6158	2.59775	-127.859	1.81878	4.54387
SRGAP2B.1	OtherIntrons|ENSG00000196369.12	SRGAP2B.1	160460	Unknown	470.363	1.27817	-158.85	0.719288	5.73146	382.892	0.960696	-150.904	0.453247	-8.03358	699.232	0.792079	-159.765	0.288494	-1.06239
Post||snoDB1270	Post||snoDB1270	Post||snoDB1270	37846	Unknown	93.7076	1.48863	-123.987	0.899069	4.3242	33.1255	1.75598	-104.25	0.989152	7.81255	169.564	0.77805	-123.95	0.272667	-0.911621
snoDB1270	snoDB1270	snoDB1270	136	Unknown	0.671183	34.5668	-85.5308	20.3471	114.784	0.623756	69.3147	-90.8661	16.6814	-32.1613	0.93879	49.8467	-92.2338	16.7096	-50.7026
Pre||snoDB1270	Pre||snoDB1270	Pre||snoDB1270	2702	Unknown	8.07789	1.8953	-77.9074	1.11146	6.43005	2.00842	2.09985	-61.4733	0.986374	-16.2955	115.637	0.123878	-79.4155	NA	NA
LINC01145	Unrelated|ENSG00000272419.6	LINC01145	2307	Unknown	3.77809	3.60178	-74.7717	2.37706	7.42982	0.45117	69.3147	-40.9488	11.2158	-16.5822	4.79364	4.68118	-76.2385	3.0446	10.1222
NBPF20	Unrelated|ENSG00000162825.18	NBPF20	19578	Unknown	30.5381	4.74662	-117.296	3.72149	6.55124	27.6802	4.97073	-118.01	3.73607	7.4242	44.8101	3.36073	-124.11	2.46529	5.27767
NBPF25P	Unrelated|ENSG00000272150.5	NBPF25P	3827	Unknown	14.331	3.89795	-93.0699	3.08051	5.30592	16.3394	4.52874	-107.728	3.12609	8.21453	21.0404	2.80343	-101.577	1.96751	4.87438
PDZK1	Unrelated|ENSG00000174827.14	PDZK1	2084	Unknown	0.509034	20.958	-72.8068	12.4566	66.0076	0.68446	9.8691	-61.5606	5.31991	68.1213	0.702658	5.42431	-58.9049	3.50352	12.0072
RNF115	Unrelated|ENSG00000265491.5	RNF115	9135	Unknown	76.132	6.71062	-152.822	5.00351	10.1859	43.0788	5.29708	-139.915	3.51548	10.7399	97.9268	3.7723	-151.253	2.69823	6.26695
PIAS3	Unrelated|ENSG00000131788.16	PIAS3	2902	Unknown	159.106	8.61494	-173.009	6.65405	12.2144	176.187	7.39179	-176.212	5.26458	12.4036	163.914	4.73226	-167.226	3.47626	7.40929
ITGA10	Unrelated|ENSG00000143127.13	ITGA10	5130	Unknown	3.99651	2.64894	-79.0313	1.41464	20.7799	2.72699	3.88805	-63.9448	2.53574	8.33095	2.09361	6.67997	-73.8005	3.04451	-34.414
PEX11B	Unrelated|ENSG00000131779.11	PEX11B	1632	Unknown	84.0967	3.03642	-123.853	2.48482	3.9028	44.9989	4.16256	-126.735	2.86452	7.61176	85.6248	2.61149	-136.028	1.77748	4.92002
ENSG00000289565	Unrelated|ENSG00000289565.1	ENSG00000289565	495	Unknown	49.1785	7.61092	-137.066	6.13106	10.0325	51.6134	6.50454	-141.728	4.5871	11.1764	53.4722	5.78123	-143.969	4.17635	9.38935
RBM8A	Unrelated|ENSG00000265241.8	RBM8A	4909	Unknown	179.886	6.8039	-164.419	5.52767	8.84633	156.098	6.36359	-165.494	4.60958	10.2723	191.438	5.5014	-172.751	3.97027	8.95484
LIX1L	Unrelated|ENSG00000271601.4	LIX1L	3991	Unknown	1.15831	3.91602	-53.2851	2.41367	10.3717	4.03645	9.92549	-91.1098	5.76812	35.5433	2.57773	4.4226	-78.499	2.70314	12.1533
ANKRD34A	Unrelated|ENSG00000272031.3	ANKRD34A	3607	Unknown	10.2426	7.30981	-127.261	4.05589	36.9689	14.8156	2.67302	-104.331	2.00631	4.00334	9.59622	1.82052	-95.1242	1.23475	3.46374
TXNIP	Unrelated|ENSG00000265972.6	TXNIP	2905	Unknown	829.178	1.72411	-177.397	1.13809	3.55432	876.688	1.37461	-175.056	0.835726	3.86998	603.168	1.5996	-177.503	0.88678	8.15408
NBPF10	Unrelated|ENSG00000271425.9	NBPF10	13030	Unknown	56.7523	3.59503	-125.291	2.80403	5.00767	75.0697	3.83304	-138.396	2.83803	5.90243	71.8495	2.82908	-132.937	1.99586	4.85661
NOTCH2NLA	Unrelated|ENSG00000264343.7	NOTCH2NLA	8356	Unknown	52.1882	4.08755	-128.847	3.12836	5.89505	55.3955	4.48326	-135.477	3.23846	7.28252	60.4244	3.11775	-134.504	2.14844	5.68069
SEC22B4P	Unrelated|ENSG00000277406.2	SEC22B4P	1466	Unknown	3.19381	9.76702	-81.245	7.60918	13.6332	2.12402	9.92775	-70.8633	6.24531	24.1923	3.19035	7.16353	-77.9725	5.20639	11.4784
PRKAB2	Unrelated|ENSG00000131791.8	PRKAB2	5343	Unknown	76.2719	3.36922	-134.503	2.52646	5.05563	74.2469	5.3347	-144.776	3.66294	9.81363	88.7072	3.69244	-145.455	2.57717	6.5094
LINC00624.1	OtherIntrons|ENSG00000278811.4	LINC00624.1	150255	Unknown	11.664	4.53714	-110.818	2.87599	10.7411	7.74374	2.9103	-95.0074	1.96547	5.60443	9.97692	2.51347	-105.499	1.41961	10.9537
ACP6	Unrelated|ENSG00000162836.12	ACP6	6956	Unknown	17.7598	7.6389	-121.019	5.69541	11.5959	25.3773	5.69246	-124.569	3.95587	10.1468	20.6683	5.96113	-128.013	3.78005	14.0925
NBPF11	Unrelated|ENSG00000263956.8	NBPF11	5494	Unknown	87.765	2.20372	-130.392	1.52201	3.99158	70.5785	4.5301	-136.047	3.18067	7.86833	105.145	2.0221	-132.096	1.34958	4.0306
LINC01138	Unrelated|ENSG00000274020.4	LINC01138	2212	Unknown	3.89656	3.38613	-84.6017	1.86926	17.9619	0.645045	69.3147	-53.5506	11.1958	-16.5385	1.40043	69.3147	-78.5536	10.59	-15.2498
NBPF14	Unrelated|ENSG00000270629.7	NBPF14	10779	Unknown	70.7948	3.66112	-131.611	2.84263	5.14155	91.4738	3.74452	-142.395	2.84638	5.47075	86.7675	2.86581	-136.176	2.09515	4.53332
NOTCH2NLB	Unrelated|ENSG00000286019.2	NOTCH2NLB	7830	Unknown	39.9797	3.77397	-123.677	2.78838	5.83721	41.2668	3.79296	-126.069	2.73292	6.19643	45.1294	2.81138	-127.79	1.88052	5.56711
NBPF9	Unrelated|ENSG00000269713.9	NBPF9	7899	Unknown	52.7631	5.18719	-133.027	4.05237	7.20482	47.0296	6.33714	-136.312	4.54296	10.4735	66.7418	4.05178	-140.906	2.86507	6.91666
H2BC18	Unrelated|ENSG00000203814.7	H2BC18	999	Unknown	3540.26	0.752243	-205.613	0.171484	Inf	310.015	1.93845	-162.773	1.26229	4.17463	2605.34	0.867506	-202.281	0.295431	-0.926415
ENSG00000233030	Unrelated|ENSG00000233030.2	ENSG00000233030	3543	Unknown	16.3838	1.26448	-84.6275	0.620546	Inf	29.8724	1.20708	-93.0275	0.620419	22.1826	132.987	0.131462	-84.385	NA	NA
SF3B4	Unrelated|ENSG00000143368.10	SF3B4	1544	Unknown	478.067	4.70096	-183.573	3.66888	6.54099	442.524	5.33139	-183.723	3.92598	8.30402	501.847	4.06244	-190.569	2.9585	6.48061
MTMR11	Unrelated|ENSG00000014914.21	MTMR11	2840	Unknown	6.02568	13.5048	-110.569	9.78604	21.7822	10.7244	6.49437	-112.173	4.54064	11.3991	8.21781	6.10826	-106.234	4.53401	9.35712
OTUD7B	Unrelated|ENSG00000264522.6	OTUD7B	8922	Unknown	358.505	2.34439	-156.776	1.80562	3.34142	239.1	3.70968	-162.535	2.55276	6.78438	414.582	2.04852	-166.903	1.30774	4.72517
ENSG00000285184	Unrelated|ENSG00000285184.5	ENSG00000285184	2941	Unknown	5.14328	4.70174	-86.3176	3.23276	8.61761	5.74023	5.97676	-88.1084	4.19845	10.3685	6.4684	3.86426	-88.6729	2.58272	7.67015
ANP32E	Unrelated|ENSG00000143401.15	ANP32E	3407	Unknown	31.6298	12.4074	-150.067	8.84013	20.8017	22.9926	8.84127	-138.939	5.98348	16.9248	28.046	7.25601	-143.532	5.11507	12.4793
APH1A	Unrelated|ENSG00000117362.13	APH1A	2353	Unknown	144.576	12.0939	-171.196	9.9308	15.4617	154.517	7.42168	-170.53	5.58081	11.0748	142.905	7.90982	-174.977	5.71888	12.822
MCL1	Unrelated|ENSG00000143384.14	MCL1	3950	Unknown	1303.39	1.30016	-178.731	0.803898	3.39753	1130.14	1.70241	-183.411	1.0703	4.15827	1752.82	1.17302	-189.498	0.593732	48.2033
ENSA	Unrelated|ENSG00000143420.19	ENSA	2818	Unknown	195.995	12.0941	-179.135	9.8836	15.5783	172.828	13.362	-180.508	8.89162	26.8729	190.598	10.5385	-182.672	7.32537	18.773
GOLPH3L	Unrelated|ENSG00000143457.11	GOLPH3L	3124	Unknown	141.096	2.56869	-141.918	1.89531	3.98424	87.3724	3.44776	-139.518	2.29053	6.96833	160.273	2.06929	-146.295	1.29603	5.13005
CTSK	Unrelated|ENSG00000143387.14	CTSK	3665	Unknown	12.587	1.36699	-79.6662	0.711064	17.6298	6.49292	2.12063	-76.2025	1.21883	8.15286	10.3863	2.54933	-87.2186	1.5962	6.32783
ARNT	Unrelated|ENSG00000143437.21	ARNT	4710	Unknown	123.218	5.37123	-156.408	4.11097	7.7458	93.4807	4.78083	-153.195	3.29618	8.69896	154.604	4.16157	-164.456	2.84068	7.77851
CERS2	Unrelated|ENSG00000143418.20	CERS2	2544	Unknown	552.139	10.0121	-205.223	7.81869	13.9162	405.804	8.62189	-199.252	6.00587	15.2756	412.586	6.74208	-197.873	4.57947	12.7749
MINDY1	Unrelated|ENSG00000143409.17	MINDY1	2817	Unknown	50.9787	5.97663	-140.234	4.46391	9.04015	43.185	7.94871	-138.362	5.18167	17.0575	49.4067	7.30765	-145.848	4.26298	25.5704
CDC42SE1	Unrelated|ENSG00000197622.13	CDC42SE1	3498	Unknown	425.757	3.93835	-176.457	3.06497	5.50782	507.217	3.55068	-180.456	2.73089	5.07379	450.97	2.81721	-178.668	2.04141	4.54407
SEMA6C	Unrelated|ENSG00000143434.17	SEMA6C	3873	Unknown	4.16162	3.34932	-90.2218	1.69722	125.976	5.93009	19.197	-85.3166	11.175	68.041	3.10789	14.7969	-85.6099	6.08744	-34.3531
LYSMD1	Unrelated|ENSG00000163155.12	LYSMD1	2462	Unknown	37.2291	2.87895	-114.038	2.11989	4.48481	29.9945	3.15108	-114.231	2.37347	4.68649	44.6297	1.74353	-114.88	1.18626	3.28825
VPS72	Unrelated|ENSG00000163159.15	VPS72	1511	Unknown	158.752	4.60434	-149.819	3.7984	5.84439	130.442	5.86798	-157.747	4.2911	9.27712	167.163	3.87936	-159.15	2.93108	5.73469
ZNF687-AS1	Unrelated|ENSG00000232671.8	ZNF687-AS1	1039	Unknown	4.5706	2.92517	-73.6562	1.91132	6.22962	8.51607	2.02035	-79.5231	1.28087	4.78	3.99869	3.42175	-70.4372	2.34323	6.33975
PI4KB	Unrelated|ENSG00000143393.17	PI4KB	3983	Unknown	345.69	5.451	-172.828	4.49253	6.92939	381.97	6.3482	-182.724	4.6838	9.84759	327.426	3.81762	-176.286	2.68396	6.60926
RFX5	Unrelated|ENSG00000143390.18	RFX5	3576	Unknown	103.201	5.78221	-161.423	4.0762	9.9441	115.986	8.1893	-164.849	5.77088	14.097	94.786	8.34023	-163.17	4.89114	28.2884
SELENBP1	Unrelated|ENSG00000143416.21	SELENBP1	1928	Unknown	35.685	12.1776	-142.474	9.62642	16.5685	10.4082	11.8024	-120.101	8.11778	21.6122	24.6244	14.2263	-143.095	8.3863	46.854
POGZ	Unrelated|ENSG00000143442.23	POGZ	6655	Unknown	600.864	2.28563	-172.556	1.68367	3.5576	332.303	3.55727	-173.291	2.56061	5.8242	672.028	1.86889	-179.026	1.24237	3.77018
MRPL9	Unrelated|ENSG00000143436.11	MRPL9	1224	Unknown	81.6444	9.32716	-159.248	7.1788	13.3105	95.5747	7.76873	-160.216	5.54238	12.9846	98.9645	5.7518	-159.809	4.26736	8.8199
TDRKH	Unrelated|ENSG00000182134.17	TDRKH	3093	Unknown	34.429	7.62065	-132.8	5.91545	10.7071	29.2006	8.33236	-128.716	5.90474	14.1497	32.3446	7.3452	-138.548	4.62305	17.8637
THEM4	Unrelated|ENSG00000159445.13	THEM4	4798	Unknown	10.9485	7.32855	-105.109	5.64868	10.4305	16.6946	9.50828	-119.627	5.96995	23.3442	17.7007	6.06699	-123.06	4.12876	11.4352
S100A10	Unrelated|ENSG00000197747.9	S100A10	671	Unknown	169.548	12.3027	-181.824	9.57515	17.2031	161.532	12.2615	-180.157	8.06068	25.6062	133.331	11.1789	-184.285	7.30131	23.8397
S100A11	Unrelated|ENSG00000163191.6	S100A11	563	Unknown	153.704	13.7314	-181.336	10.7251	19.0794	211.321	11.3493	-190.285	7.76489	21.0802	119.881	11.6654	-181.396	7.74498	23.6233
TCHH	Unrelated|ENSG00000159450.13	TCHH	6985	Unknown	10.3542	1.78584	-83.8273	1.00162	8.22773	15.9634	1.36732	-91.6176	0.775588	5.76789	7.06321	0.978009	-66.5523	0.400182	-2.20316
S100A6	Unrelated|ENSG00000197956.10	S100A6	673	Unknown	10.6592	45.4803	-144.803	30.7556	87.2551	7.88682	29.7107	-144.361	16.7094	133.882	6.70319	20.917	-138.673	13.7478	43.7117
S100A16	Unrelated|ENSG00000188643.11	S100A16	1172	Unknown	89.1152	19.9495	-182.926	14.3023	32.9661	77.3625	9.3385	-166.459	7.01984	13.9443	48.637	10.2746	-164.906	7.45502	16.524
S100A14	Unrelated|ENSG00000189334.9	S100A14	1218	Unknown	39.3998	20.1494	-162.518	14.6089	32.4597	15.3302	9.726	-144.685	6.97697	16.0499	20.7685	10.2217	-149.471	7.57438	15.7139
S100A13	Unrelated|ENSG00000189171.15	S100A13	710	Unknown	20.0118	21.1305	-138.403	16.6937	28.7793	16.6912	18.9902	-136.558	12.3813	40.732	19.9612	14.6566	-141.183	10.0514	27.0501
ENSG00000271853	Unrelated|ENSG00000271853.5	ENSG00000271853	753	Unknown	5.63329	20.3655	-114.839	14.9585	31.8942	4.8299	19.9896	-114.37	11.0856	101.575	5.69677	16.3926	-119.397	9.7052	52.7176
ENSG00000272030	Unrelated|ENSG00000272030.1	ENSG00000272030	831	Unknown	0.869668	7.23541	-63.5356	4.33055	21.9776	0.545952	7.47308	-60.8212	3.85315	123.466	1.10599	5.28281	-53.0747	3.47845	10.9767
ILF2	Unrelated|ENSG00000143621.17	ILF2	1906	Unknown	155.16	11.4558	-183.395	8.45878	17.742	141.606	7.6174	-170.847	5.50717	12.3494	150.498	6.76715	-179.136	4.92129	10.8287
GATAD2B	Unrelated|ENSG00000143614.10	GATAD2B	7475	Unknown	211.882	2.67569	-148.426	2.07043	3.781	102.547	3.39469	-140.779	2.43786	5.58788	256.351	1.77888	-152.462	1.18774	3.54149
DENND4B	Host|ENSG00000198837.10	DENND4B	5728	Unknown	85.8751	7.40967	-154.204	5.74392	10.4362	82.3006	7.70451	-152.304	5.3202	13.9616	104.498	4.22445	-154.252	3.19135	6.24656
DENND4B.1	OtherIntrons|ENSG00000198837.10	DENND4B.1	10395	Unknown	12.7653	2.34931	-91.1482	1.5232	5.13336	16.1059	1.96252	-93.4686	1.2926	4.07389	16.8997	1.45879	-89.0341	0.911889	3.6447
CRTC2	Unrelated|ENSG00000160741.17	CRTC2	2631	Unknown	75.7496	4.1066	-126.75	3.44347	5.08605	74.0237	5.96944	-145.544	4.28393	9.8416	92.8805	3.21987	-140.591	2.36114	5.06025
SLC39A1	Unrelated|ENSG00000143570.19	SLC39A1	2723	Unknown	122.209	9.11128	-157.817	7.63894	11.2867	171.401	6.3598	-168.679	4.81355	9.36959	138.391	6.02344	-166.705	4.49643	9.12095
ENSG00000285779	Unrelated|ENSG00000285779.1	ENSG00000285779	2253	Unknown	118.014	9.35495	-157.831	7.83103	11.6153	161.079	6.56761	-168.382	4.92312	9.86179	133.476	6.13532	-166.486	4.56545	9.35061
JTB	Unrelated|ENSG00000143543.15	JTB	1273	Unknown	79.2403	13.3668	-163.802	10.5431	18.2562	81.1171	10.6058	-161.697	7.51361	18.0231	72.452	8.75895	-161.538	6.33574	14.1837
ENSG00000285641	Unrelated|ENSG00000285641.1	ENSG00000285641	1706	Unknown	50.0706	14.8941	-152.552	11.9828	19.6741	47.6543	12.2564	-155.511	8.47842	22.1074	46.4514	10.0908	-153.558	7.26314	16.5237
RAB13	Unrelated|ENSG00000143545.10	RAB13	1353	Unknown	21.576	16.8889	-140.532	12.8809	24.5179	22.0699	14.5405	-147.336	9.07946	36.486	21.9648	12.3586	-142.093	8.24298	24.6823
NUP210L	Host|ENSG00000143552.9	NUP210L	5889	Unknown	11.2855	9.69801	-112.723	7.46033	13.8532	6.59697	10.2643	-100.846	6.4396	25.2774	11.9789	6.84075	-115.563	4.53191	13.9454
NUP210L.1	OtherIntrons|ENSG00000143552.9	NUP210L.1	150868	Unknown	23.3507	2.42256	-104.616	1.61992	4.80175	39.0202	1.22287	-106.535	0.576971	-10.2365	25729.3	0.00195764	-110.144	NA	NA
Post|U3|snoDB1995	Post|U3|snoDB1995	Post|U3|snoDB1995	2886	Unknown	2.40839	3.03565	-62.4247	1.89746	7.58628	2.34405	2.01675	-52.537	1.05498	22.8268	5.82042	0.926663	-61.265	0.356525	-1.54663
TPM3	Unrelated|ENSG00000143549.21	TPM3	7064	Unknown	182.387	14.0945	-192.393	10.3137	22.2512	182.325	8.94104	-185.499	6.18279	16.1425	179.51	8.70203	-188.152	6.07738	15.317
C1orf43	Unrelated|ENSG00000143612.21	C1orf43	1678	Unknown	175.691	8.83971	-170.332	7.17109	11.5204	201.542	7.65199	-170.358	5.57992	12.172	183.574	6.56079	-174.424	4.74265	10.6396
UBE2Q1	Unrelated|ENSG00000160714.10	UBE2Q1	3239	Unknown	136.178	4.07328	-148.694	3.20801	5.57772	117.371	6.78802	-159.71	4.88358	11.1273	153.972	3.23582	-154.704	2.38862	5.01426
ADAR	Unrelated|ENSG00000160710.18	ADAR	6971	Unknown	408.848	7.80444	-189.512	6.23475	10.4304	519.37	7.70703	-198.64	5.3779	13.5949	452.872	6.08709	-196.633	4.25658	10.6799
PMVK	Unrelated|ENSG00000163344.6	PMVK	1002	Unknown	11.6425	11.4813	-108.39	9.51222	14.4784	16.3945	9.55622	-119.759	6.91564	15.4588	10.2661	10.7139	-117.52	7.20339	20.8984
PBXIP1	Unrelated|ENSG00000163346.17	PBXIP1	3207	Unknown	22.2746	6.17774	-136.786	3.74437	17.6443	21.6788	14.9348	-128.342	8.99294	44.0206	15.8253	19.5018	-127.353	8.44623	-63.126
PYGO2	Unrelated|ENSG00000163348.4	PYGO2	3180	Unknown	255.97	2.2275	-152.473	1.61554	3.58578	140.465	3.61058	-146.039	2.72317	5.35595	270.356	2.05693	-158.565	1.36058	4.2134
SHC1	Unrelated|ENSG00000160691.19	SHC1	3481	Unknown	138.872	5.03961	-144.104	4.29304	6.10052	110.427	6.81206	-156.912	5.01644	10.6098	135.222	4.40793	-157.317	3.20678	7.04778
DPM3	Unrelated|ENSG00000179085.8	DPM3	486	Unknown	7.95302	15.1334	-104.164	12.5987	18.9448	8.53845	8.57963	-108.094	6.05089	14.7394	7.31383	11.5523	-115.918	8.12415	19.9854
KRTCAP2	Unrelated|ENSG00000163463.13	KRTCAP2	598	Unknown	25.1097	14.0982	-137.551	11.0931	19.3363	26.2221	12.8241	-142.625	8.32552	27.8987	24.6861	10.5325	-142.31	7.27699	19.0592
ENSG00000273088	Unrelated|ENSG00000273088.2	ENSG00000273088	753	Unknown	16.0581	13.3134	-130.379	10.0145	19.8531	15.7988	13.5551	-133.595	8.31462	36.6617	15.3551	11.2846	-135.449	7.21832	25.8422
MUC1	Unrelated|ENSG00000185499.17	MUC1	1811	Unknown	4.07857	27.7994	-122.209	17.6208	65.8197	1.28133	10.3524	-91.194	7.13306	18.8678	1.20585	10.4595	-99.6982	7.08706	19.9553
THBS3	Unrelated|ENSG00000169231.13	THBS3	3200	Unknown	4.87951	9.35378	-88.6125	7.40513	12.6942	5.53532	10.6114	-92.1745	7.4365	18.517	4.03897	8.55016	-94.9585	5.62225	17.8415
GBAP1	Unrelated|ENSG00000160766.16	GBAP1	2922	Unknown	7.77017	10.0864	-99.1633	8.14466	13.2439	9.36225	7.53653	-110.267	5.2356	13.4456	6.39818	8.36337	-100.125	5.65299	16.0667
GBA	Unrelated|ENSG00000177628.16	GBA	2387	Unknown	41.0781	11.8008	-143.179	9.48744	15.6063	42.7568	8.57117	-146.574	6.41258	12.9204	32.486	9.90931	-142.69	6.54176	20.4223
FAM189B	Unrelated|ENSG00000160767.22	FAM189B	3190	Unknown	23.0119	14.8919	-140.912	11.2348	22.0792	27.8154	7.46276	-134.755	5.53858	11.4357	29.8105	6.73032	-138.022	5.26402	9.32892
SCAMP3	Unrelated|ENSG00000116521.11	SCAMP3	1545	Unknown	46.983	9.69136	-137.66	8.0507	12.1719	64.8456	9.68611	-148.93	6.86825	16.4248	51.5531	7.51611	-143.929	5.58292	11.4972
CLK2	Unrelated|ENSG00000176444.19	CLK2	2154	Unknown	81.4368	1.9501	-116.575	1.46272	2.92458	46.8801	2.49299	-113.613	1.73375	4.43528	93.7547	1.78245	-125.151	1.19732	3.48612
RUSC1-AS1	Unrelated|ENSG00000225855.7	RUSC1-AS1	1836	Unknown	1.84423	3.74907	-64.2808	2.27219	10.7111	3.69012	2.86133	-70.0224	1.83661	6.47278	1.40039	7.68136	-68.6255	3.28348	-22.6322
ASH1L	Host|ENSG00000116539.14	ASH1L	12037	Unknown	280.474	3.50776	-165.531	2.66863	5.11664	181.27	4.01424	-163.323	2.7638	7.33107	348.968	2.24261	-166.843	1.55422	4.02563
ASH1L.1	OtherIntrons|ENSG00000116539.14	ASH1L.1	194120	Unknown	310.328	1.58649	-158.168	0.920249	5.74784	397.207	1.04283	-160.825	0.479321	-5.93756	439.519	0.989198	-161.744	0.452325	-5.29217
Post|snoU13|snoDB1850	Post|snoU13|snoDB1850	Post|snoU13|snoDB1850	20004	Unknown	25.0475	1.87628	-100.253	1.18208	4.54597	25.1789	1.58047	-103.813	0.842905	12.6466	21.7224	1.78722	-104.029	1.08313	5.10714
ENSG00000246203	Unrelated|ENSG00000246203.2	ENSG00000246203	2505	Unknown	28.5094	3.32932	-111.839	2.46193	5.14038	18.3535	4.11091	-108.854	2.91443	6.97397	29.7442	2.41623	-108.014	1.79298	3.70363
YY1AP1	Host|ENSG00000163374.20	YY1AP1	3073	Unknown	159.128	3.82502	-151.205	2.99928	5.27818	109.455	4.16161	-150.512	3.07122	6.45247	178.18	2.61292	-153.021	1.92488	4.06643
YY1AP1.1	OtherIntrons|ENSG00000163374.20	YY1AP1.1	24338	Unknown	91.7879	1.48356	-121.691	0.919973	3.82962	131.812	0.968857	-129.087	0.40375	-2.42428	124.285	0.968721	-124.798	0.451122	-6.57391
Post|SCARNA26A|snoDB0984	Post|SCARNA26A|snoDB0984	Post|SCARNA26A|snoDB0984	2361	Unknown	378.035	0.0366715	-76.4002	NA	NA	8.28923	2.12072	-88.0563	1.23411	7.53157	16.2297	1.09217	-87.4096	0.462006	-3.00065
SCARNA26A	snoDB0984	SCARNA26A	148	Unknown	0.354403	49.865	-76.0112	27.6854	250.742	0.529205	69.3147	-96.4464	16.0789	-29.9946	0.595593	46.0872	-78.2313	18.8456	-103.447
GON4L	Host|ENSG00000116580.20	GON4L	7771	Unknown	129.811	3.67223	-146.387	2.84761	5.16913	125.648	3.82046	-153.132	2.69269	6.57369	164.609	2.61596	-152.338	1.83894	4.53008
GON4L.1	OtherIntrons|ENSG00000116580.20	GON4L.1	95806	Unknown	154.232	1.19274	-132.01	0.624012	13.4634	200.067	1.10264	-138.567	0.554569	94.0735	214.615	0.915135	-136.727	0.373105	-2.02126
Post|SCARNA26B|snoDB0985	Post|SCARNA26B|snoDB0985	Post|SCARNA26B|snoDB0985	5863	Unknown	5.53917	1.92822	-76.5707	0.992073	34.2057	18.4452	0.714228	-75.4308	0.188594	-0.399654	11.5846	0.978848	-76.9905	0.383999	-1.78268
RIT1	Unrelated|ENSG00000143622.11	RIT1	3390	Unknown	38.3804	2.82363	-113.184	2.10041	4.30643	49.2175	3.07399	-126.649	2.10416	5.70223	41.8225	2.52206	-120.216	1.75115	4.5055
KHDC4	Host|ENSG00000132680.11	KHDC4	4499	Unknown	135.176	1.78609	-128.52	1.28854	2.9096	96.0235	3.06573	-138.334	2.11278	5.58459	156.283	1.82774	-140.6	1.20861	3.74738
KHDC4.1	OtherIntrons|ENSG00000132680.11	KHDC4.1	13874	Unknown	89.6448	0.967403	-115.398	0.408942	Inf	72.835	1.18808	-115.609	0.626465	11.4774	98.4664	0.938823	-121.475	0.400037	-2.70679
Post|SNORA80E|snoDB0047	Post|SNORA80E|snoDB0047	Post|SNORA80E|snoDB0047	2236	Unknown	158.79	0.120406	-86.0294	NA	NA	15.4046	1.28357	-91.2079	0.692209	8.81058	140.739	0.129145	-88.208	NA	NA
Pre|SNORA80E|snoDB0047	Pre|SNORA80E|snoDB0047	Pre|SNORA80E|snoDB0047	1329	Unknown	9.27755	1.11445	-66.2753	0.516231	Inf	5.51893	1.52244	-70.6477	0.875456	5.83354	64.4711	0.144545	-64.2785	3.63767e-07	-3.63769e-07
ARHGEF2	Unrelated|ENSG00000116584.22	ARHGEF2	4727	Unknown	21.7556	5.59819	-125.758	3.82348	10.4476	40.7651	3.64308	-130.304	2.6318	5.91656	35.2538	2.33121	-120.257	1.73274	3.56125
SSR2	Unrelated|ENSG00000163479.14	SSR2	1108	Unknown	70.013	12.3247	-157.154	9.88829	16.3543	105.162	10.2229	-166.25	7.17373	17.7802	72.4912	8.66751	-161.637	6.23407	14.2171
UBQLN4	Unrelated|ENSG00000160803.8	UBQLN4	3582	Unknown	72.3023	11.4499	-161.364	8.78233	16.445	73.0741	7.74793	-159.439	5.47227	13.2636	75.8665	6.41176	-158.884	4.78082	9.73165
MEX3A	Unrelated|ENSG00000254726.3	MEX3A	6591	Unknown	13.8453	6.60383	-124.895	4.1389	16.328	43.4862	3.79838	-136.815	2.73976	6.19019	34.1769	1.74818	-121.356	1.26405	2.83334
PAQR6	Unrelated|ENSG00000160781.17	PAQR6	2277	Unknown	7.38901	2.46575	-88.2472	1.39253	10.7535	6.70566	4.73406	-84.9034	2.82167	14.6906	8.62935	3.88344	-92.8444	2.27151	13.3739
SMG5	Host|ENSG00000198952.8	SMG5	4559	Unknown	181.837	8.15198	-162.803	6.91975	9.91816	239.992	8.74047	-181.45	6.32395	14.146	184.058	5.84702	-170.025	4.30186	9.12436
SMG5.1	OtherIntrons|ENSG00000198952.8	SMG5.1	26645	Unknown	3328.29	0.0286704	-116.733	NA	NA	103.48	1.02703	-119.15	0.508032	-47.6003	88.3008	0.957632	-119.602	0.430767	-4.29268
GLMP	Unrelated|ENSG00000198715.13	GLMP	1851	Unknown	14.4772	10.5074	-115.555	8.44881	13.8923	24.7357	8.71339	-129.356	6.01467	15.8048	20.0496	10.3499	-130.925	6.62187	23.6835
CCT3	Host|ENSG00000163468.15	CCT3	1977	Unknown	259.47	12.0389	-192.613	9.27887	17.1361	32.9492	16.6155	-140.753	9.80023	54.5521	283.182	8.14368	-195.074	5.86772	13.304
CCT3.1	OtherIntrons|ENSG00000163468.15	CCT3.1	23516	Unknown	5887.54	0.0215056	-125.694	NA	NA	74.9459	1.37862	-121.787	0.815844	4.44434	270.379	0.526677	-126.335	0.0751777	-0.105214
Post||snoDB1392	Post||snoDB1392	Post||snoDB1392	3477	Unknown	4.76072	1.98311	-70.5624	1.09312	10.672	18.0256	0.595432	-72.9131	0.0965771	-0.142949	5.65786	1.61498	-73.1519	0.903403	7.60554
MEF2D	Unrelated|ENSG00000116604.19	MEF2D	5912	Unknown	123.994	2.31607	-130.319	1.79265	3.27119	137.878	3.05119	-144.378	2.20733	4.93961	147.136	2.16093	-141.855	1.43057	4.41493
IQGAP3	Unrelated|ENSG00000183856.11	IQGAP3	6013	Unknown	51.7294	10.0187	-149.376	7.75416	14.1516	21.4275	5.36267	-125.85	4.05953	7.89797	53.0931	5.575	-143.013	4.09773	8.71788
GPATCH4	Unrelated|ENSG00000160818.17	GPATCH4	2154	Unknown	24.7522	7.78119	-140.073	5.08018	16.615	44.4845	5.14249	-139.938	3.66849	8.59662	27.0602	3.79119	-128.682	2.85819	5.62851
ENSG00000229953	Unrelated|ENSG00000229953.1	ENSG00000229953	758	Unknown	5.05604	5.89924	-88.1646	4.22738	9.75863	2.48269	2.72497	-67.065	1.66384	7.52249	3.93206	3.19265	-76.9778	2.60977	4.11076
NES	Unrelated|ENSG00000132688.11	NES	5568	Unknown	18.9811	16.9849	-143.903	12.0856	28.5646	17.7361	6.78369	-142.441	4.90333	11.0033	21.719	6.93617	-139.784	5.37763	9.76678
CRABP2	Unrelated|ENSG00000143320.9	CRABP2	1033	Unknown	104.113	26.1969	-195.428	17.5663	51.4992	51.7865	12.279	-172.355	8.7335	20.6705	46.6643	11.035	-180.421	7.85441	18.5444
ISG20L2	Unrelated|ENSG00000143319.17	ISG20L2	3303	Unknown	328.864	2.13074	-164.516	1.3986	4.47147	267.048	2.71883	-160.348	2.03801	4.08269	303.458	1.83787	-161.573	1.24979	3.47126
MRPL24	Unrelated|ENSG00000143314.12	MRPL24	883	Unknown	22.035	15.775	-141.11	11.8786	23.475	14.8106	11.1433	-137.644	7.47313	21.8979	17.7116	9.48494	-139.287	6.91592	15.0906
HDGF	Unrelated|ENSG00000143321.19	HDGF	2309	Unknown	244.606	18.8329	-203.397	13.9504	28.9734	152.606	10.4497	-191.673	7.44757	17.5066	195.539	9.56806	-195.936	6.92581	15.47
ARHGEF11	Unrelated|ENSG00000132694.19	ARHGEF11	7261	Unknown	138.237	3.93716	-144.425	3.19805	5.12059	135.069	9.70618	-168.352	6.02857	24.8895	108.725	4.02616	-150.233	2.73929	7.59336
ETV3	Unrelated|ENSG00000117036.12	ETV3	5282	Unknown	286.944	1.06988	-138.57	0.579129	7.01037	215.299	1.75173	-145.233	1.11532	4.07956	332.956	1.02627	-144.509	0.496398	-15.2189
TAGLN2	Unrelated|ENSG00000158710.15	TAGLN2	1603	Unknown	97.317	20.6559	-183.785	15.1109	32.6297	59.6981	10.503	-166.56	7.58359	17.077	64.9481	11.2677	-173.892	8.15211	18.2379
IGSF9	Unrelated|ENSG00000085552.18	IGSF9	4059	Unknown	14.1672	7.61953	-120.868	5.34265	13.2784	11.752	5.83134	-110.214	4.42287	8.556	13.1425	4.11847	-113.792	2.93871	6.88081
IGSF8	Unrelated|ENSG00000162729.14	IGSF8	2366	Unknown	13.7294	11.1206	-114.476	9.01962	14.4976	15.8218	9.37765	-116.563	6.40279	17.5158	16.3603	7.18738	-117.226	5.21944	11.5375
DCAF8	Unrelated|ENSG00000132716.19	DCAF8	4106	Unknown	50.1657	5.20186	-126.428	4.25302	6.69564	20.4875	7.22273	-109.748	5.23717	11.6332	52.7386	4.8158	-137.065	3.36696	8.45343
ENSG00000258465	Unrelated|ENSG00000258465.8	ENSG00000258465	914	Unknown	10.9968	7.10139	-103.95	5.49984	10.0189	9.8366	5.88185	-99.1768	4.36147	9.02946	14.8226	5.60771	-111.316	3.74434	11.1629
PEX19	Unrelated|ENSG00000162735.19	PEX19	3653	Unknown	33.6395	7.46156	-128.155	5.97732	9.92639	32.0056	5.69328	-129.551	4.1907	8.87568	37.2846	6.16266	-134.312	4.28447	10.9728
COPA	Unrelated|ENSG00000122218.17	COPA	5318	Unknown	83.252	15.2296	-172.218	11.486	22.5934	67.6113	9.43547	-171.28	6.46946	17.4235	75.4446	9.41308	-168.16	6.65031	16.1026
F11R	Unrelated|ENSG00000158769.18	F11R	4770	Unknown	174.974	5.17236	-154.918	4.2716	6.55453	173.307	6.08851	-161.848	4.42302	9.76584	171.162	4.58581	-163.359	3.22184	7.9525
ENSG00000270149	Unrelated|ENSG00000270149.5	ENSG00000270149	2096	Unknown	98.5456	5.35993	-140.925	4.46099	6.71257	98.6803	6.62759	-149.585	4.78636	10.771	93.4208	4.80587	-148.604	3.43976	7.97193
TSTD1	Unrelated|ENSG00000215845.11	TSTD1	626	Unknown	2.92192	18.8704	-92.1841	14.6926	26.3679	1.97049	40.6709	-87.5905	18.5903	-216.627	3.25817	23.543	-102.635	13.2416	106.027
USF1	Unrelated|ENSG00000158773.14	USF1	1807	Unknown	40.4542	3.891	-114.55	3.16205	5.05672	45.2869	4.96687	-130.078	3.4763	8.69521	52.5109	3.16554	-127.439	2.28346	5.15806
NECTIN4	Unrelated|ENSG00000143217.9	NECTIN4	3458	Unknown	61.5492	1.80733	-111.302	1.28636	3.03749	47.156	2.15424	-116.436	1.56332	3.46332	40.9857	1.62961	-109.348	1.09346	3.19735
PFDN2	Unrelated|ENSG00000143256.5	PFDN2	598	Unknown	13.0595	8.30632	-119.002	5.96597	13.6681	19.2557	6.92271	-122.018	4.87417	11.9415	13.8179	5.34329	-115.314	3.83744	8.79426
DEDD	Unrelated|ENSG00000158796.17	DEDD	2344	Unknown	30.957	6.32312	-126.666	4.86555	9.02748	36.8788	5.50674	-128.215	4.07809	8.47611	41.828	3.86682	-131.541	2.81803	6.15903
B4GALT3	Unrelated|ENSG00000158850.15	B4GALT3	2414	Unknown	39.9736	6.42316	-132.721	4.96424	9.0965	48.1265	6.14914	-133.737	4.55242	9.47101	53.0238	3.79562	-135.333	2.7054	6.35763
ATF6-DT	Unrelated|ENSG00000226889.4	ATF6-DT	1288	Unknown	1.00673	6.59326	-55.3181	4.54144	12.0271	5.07078	2.69512	-81.046	1.72324	6.18127	3.39407	1.958	-67.3876	1.17112	5.96785
ALDH9A1	Unrelated|ENSG00000143149.13	ALDH9A1	2395	Unknown	28.8266	8.87994	-131.188	6.95728	12.2711	22.3072	7.90048	-125.601	5.5329	13.8098	36.7738	6.88217	-140.36	4.71313	12.7498
TMCO1	Host|ENSG00000143183.18	TMCO1	4468	Unknown	30.1849	8.03426	-137.455	5.82818	12.9276	15.3745	14.4615	-124.422	8.39314	52.2111	27.3992	8.99122	-136.024	5.88011	19.0933
Pre||snoDB1620	Pre||snoDB1620	Pre||snoDB1620	14801	Unknown	22.024	0.963712	-77.3731	0.447712	Inf	263.132	0.111515	-94.0571	NA	NA	241.996	0.100886	-89.857	NA	NA
TMCO1.1	OtherIntrons|ENSG00000143183.18	TMCO1.1	83670	Unknown	18.7248	1.79135	-86.7086	1.20575	3.48284	41.1579	1.30379	-108.305	0.639271	-33.0149	26.6927	1.36903	-95.9659	0.774178	5.91025
TADA1	Unrelated|ENSG00000152382.6	TADA1	2096	Unknown	91.1022	1.50177	-117.569	0.996458	3.04683	78.8927	2.20584	-124.937	1.53868	3.8944	111.583	1.37074	-130.205	0.830091	3.93114
CREG1	Unrelated|ENSG00000143162.9	CREG1	1997	Unknown	25.0353	9.2564	-136.887	6.67221	15.1077	24.6149	12.9778	-134.944	8.10895	32.4787	24.5062	12.2749	-136.568	7.71332	30.04
MPC2	Unrelated|ENSG00000143158.11	MPC2	2223	Unknown	16.2533	13.586	-132.43	10.0747	20.8545	10.0324	14.8207	-120.373	9.19066	38.2556	15.8926	10.7753	-131.023	7.02544	23.1109
NME7	Unrelated|ENSG00000143156.14	NME7	1590	Unknown	5.21689	9.35474	-100.541	6.66053	15.7092	3.04805	11.7251	-85.9911	7.71207	24.4453	3.74236	9.3301	-96.1001	5.67755	26.159
SLC19A2	Unrelated|ENSG00000117479.15	SLC19A2	3612	Unknown	85.6717	3.53589	-157.562	2.04229	13.1613	70.8141	1.83923	-128.152	1.20059	3.9295	104.127	1.36245	-137.424	0.911747	2.69431
SELL	Unrelated|ENSG00000188404.10	SELL	2442	Unknown	3.77991	16.6913	-101.088	12.3986	25.5309	0.614781	10.8396	-65.7535	6.45336	33.8405	2.80973	9.63442	-107.095	6.3146	20.3144
METTL18	Unrelated|ENSG00000171806.12	METTL18	1462	Unknown	22.1075	2.3501	-99.4799	1.62883	4.21781	23.061	2.23115	-106.132	1.42552	5.13077	31.4007	1.55745	-102.993	0.914033	5.26046
SCYL3	Unrelated|ENSG00000000457.14	SCYL3	6308	Unknown	88.3088	1.26515	-116.425	0.734143	4.57242	46.5437	1.80945	-113.246	1.09824	5.13445	68.4839	1.73703	-120.067	1.10669	4.03559
KIFAP3	Unrelated|ENSG00000075945.13	KIFAP3	4111	Unknown	11.8377	5.38149	-111.097	3.63091	10.3916	11.5255	10.4484	-106.589	6.72815	23.3714	10.7972	8.08348	-112.214	4.5852	34.1004
VAMP4	Unrelated|ENSG00000117533.15	VAMP4	4977	Unknown	6.93302	5.26434	-102.345	3.3223	12.6713	6.62976	7.43124	-97.6991	4.86707	15.7056	6.70401	6.06626	-97.3718	3.67185	17.4366
PIGC	Unrelated|ENSG00000135845.10	PIGC	1456	Unknown	33.3423	4.18592	-115.79	3.29266	5.74429	29.7703	3.30948	-111.525	2.51851	4.82477	42.792	2.60071	-124.506	1.80887	4.62553
CENPL	Unrelated|ENSG00000120334.16	CENPL	2706	Unknown	126.035	1.40154	-129.777	0.822421	4.73748	51.4996	2.26688	-119.619	1.597	3.90479	137.533	1.27597	-132.792	0.683334	9.61378
GAS5	Host|ENSG00000234741.10	GAS5	633	Unknown	22.8112	12.7297	-135.662	9.79018	18.1917	32.9736	11.509	-145.313	6.93995	33.6878	27.698	11.2911	-149.618	7.36971	24.1316
GAS5.1	OtherIntrons|ENSG00000234741.10	GAS5.1	168	Unknown	3.15252	2.35233	-65.07	1.35253	9.01981	68.0448	0.129031	-71.8245	NA	NA	2.74249	2.40704	-76.0679	1.21401	139.367
Pre|SNORD80|snoDB0988	Pre|SNORD80|snoDB0988	Pre|SNORD80|snoDB0988	325	Unknown	5572.11	0.00567037	-100.433	NA	NA	20.9963	1.36002	-96.5629	0.704064	19.9032	27.6159	1.02567	-104.214	0.41705	-2.23295
Post|SNORD74|snoDB0996	Post|SNORD74|snoDB0996	Post|SNORD74|snoDB0996	630	Unknown	26.5193	1.50614	-106.436	0.720831	Inf	634.546	0.124043	-119.235	NA	NA	34.9214	1.03477	-105.36	0.49915	-14.1633
Pre|SNORD74|snoDB0996	Pre|SNORD74|snoDB0996	Pre|SNORD74|snoDB0996	214	Unknown	2.85298	1.83749	-62.4935	0.870783	Inf	3.36058	2.4159	-67.6372	1.39457	9.02677	2.12483	1.9419	-57.8086	1.02596	18.1084
RC3H1	Unrelated|ENSG00000135870.12	RC3H1	11451	Unknown	389.998	2.27187	-162.474	1.66383	3.58026	255.586	3.74114	-166.638	2.57617	6.82951	427.664	2.00088	-169.117	1.28136	4.56329
MRPS14	Unrelated|ENSG00000120333.4	MRPS14	2115	Unknown	16.2983	9.90321	-119.581	7.79254	13.582	15.553	8.4825	-123.028	5.57223	17.7563	17.9408	7.68248	-125.188	5.30407	13.928
KIAA0040	Unrelated|ENSG00000235750.10	KIAA0040	4548	Unknown	39.897	2.50533	-107.729	1.90698	3.65085	25.3105	5.53419	-115.415	3.55752	12.4541	50.1766	2.03777	-118.418	1.31098	4.57291
COP1	Host|ENSG00000143207.21	COP1	2826	Unknown	30.16	9.89933	-139.226	7.43212	14.8186	22.7666	7.82997	-126.211	5.38082	14.3712	35.5708	5.56525	-137.219	3.91411	9.6258
COP1.1	OtherIntrons|ENSG00000143207.21	COP1.1	219999	Unknown	442.549	1.17049	-163.518	0.523744	Inf	871.505	0.728336	-171.992	0.184395	-0.373529	480.973	1.04168	-164.117	0.485043	-7.05691
Post|SCARNA3|snoDB0029	Post|SCARNA3|snoDB0029	Post|SCARNA3|snoDB0029	21158	Unknown	41.875	1.5989	-113.989	0.869734	9.89282	619.579	0.132757	-123.928	NA	NA	65.0555	1.0376	-117.329	0.44335	-3.04851
Pre|SCARNA3|snoDB0029	Pre|SCARNA3|snoDB0029	Pre|SCARNA3|snoDB0029	18402	Unknown	51.7578	1.69367	-120.721	0.93885	8.64054	90.0632	1.21646	-127.77	0.545239	-5.26473	65.1426	1.35801	-122.062	0.73293	9.22843
CRYZL2P	Unrelated|ENSG00000242193.11	CRYZL2P	2921	Unknown	1.1086	5.76957	-69.0517	3.14986	34.2798	1.44677	9.57367	-73.1141	5.47229	38.2152	0.691972	16.7358	-64.3758	7.99444	-179.119
ABL2	Unrelated|ENSG00000143322.21	ABL2	12217	Unknown	236.118	2.85435	-158.396	2.09462	4.47887	154.102	3.65961	-154.356	2.41484	7.55286	315.568	1.86258	-162.555	1.20679	4.07945
TOR1AIP2	Unrelated|ENSG00000169905.13	TOR1AIP2	8319	Unknown	246.236	4.62035	-168.62	3.55871	6.58468	209.783	5.09143	-169.039	3.49164	9.39687	323.653	3.4676	-176.387	2.36881	6.46767
ACBD6	Unrelated|ENSG00000230124.8	ACBD6	5109	Unknown	46.8372	6.72208	-133.45	5.39074	8.9267	31.2545	6.348	-127.347	4.31811	11.9794	52.6541	4.66629	-138.078	3.29858	7.97162
ENSG00000243155	Unrelated|ENSG00000243155.1	ENSG00000243155	2424	Unknown	17.7779	4.13352	-104.386	3.12952	6.08597	16.7941	5.57719	-114.068	3.64089	11.9125	18.2016	3.70115	-107.874	2.57912	6.55124
KIAA1614-AS1	Unrelated|ENSG00000232586.1	KIAA1614-AS1	1440	Unknown	6.56682	3.18754	-81.8124	2.17915	5.93298	5.98069	4.05207	-85.6042	2.31434	16.2636	6.09833	4.3935	-86.5648	2.66779	12.4417
STX6	Unrelated|ENSG00000135823.14	STX6	4810	Unknown	111.107	4.65871	-149.703	3.58921	6.63614	107.88	4.59028	-152.961	3.3121	7.47494	127.616	3.32006	-152.57	2.40019	5.38318
GLUL	Unrelated|ENSG00000135821.19	GLUL	7554	Unknown	120.912	4.40658	-150.836	3.37762	6.33713	122.996	3.80753	-151.782	2.91353	5.49304	83.9619	4.85244	-154.18	3.0316	12.15
RNASEL	Unrelated|ENSG00000135828.11	RNASEL	4238	Unknown	38.7365	2.6332	-120.099	1.75229	5.2952	41.4591	3.56433	-118.852	2.56897	5.81888	28.1518	3.4837	-116.359	2.26765	7.5121
RGS16	Unrelated|ENSG00000143333.7	RGS16	2408	Unknown	34.8276	3.00749	-133.83	1.64986	16.9794	167.022	0.75436	-126.328	0.308148	-1.68366	59.4364	0.903666	-114.52	0.504901	4.29882
NMNAT2	Unrelated|ENSG00000157064.11	NMNAT2	5448	Unknown	1.11837	7.84156	-70.3565	4.78315	21.7467	0.772747	10.8718	-57.7247	5.7013	116.777	1.4606	9.11965	-68.3896	5.00389	51.3823
ARPC5	Unrelated|ENSG00000162704.16	ARPC5	7266	Unknown	114.124	6.56573	-159.738	5.01067	9.52039	111.372	7.54088	-158.358	5.17797	13.8706	100.257	7.45226	-163.243	4.82934	16.3112
EDEM3	Unrelated|ENSG00000116406.20	EDEM3	6837	Unknown	98.3762	2.99928	-139.23	2.19549	4.73158	95.9653	4.49069	-147.718	3.0455	8.5461	90.4107	2.72029	-139.699	1.80307	5.53691
NIBAN1	Unrelated|ENSG00000135842.17	NIBAN1	6884	Unknown	1.15963	8.33046	-64.6235	5.71733	15.3431	0.33869	5.67796	-49.5292	3.11048	32.5246	1.32322	4.70198	-52.8617	3.23144	8.62864
TRMT1L	Unrelated|ENSG00000121486.12	TRMT1L	4361	Unknown	31.3842	3.92935	-123.919	2.7398	6.94449	16.8142	4.35013	-110.07	3.07782	7.4156	39.7348	2.80531	-123.617	1.85944	5.70985
IVNS1ABP	Unrelated|ENSG00000116679.16	IVNS1ABP	4113	Unknown	113.906	6.65654	-166.539	4.73044	11.2284	130.318	5.60971	-165.854	3.79147	10.7788	136.31	3.90861	-167.314	2.61022	7.7772
TPR	Unrelated|ENSG00000047410.14	TPR	9636	Unknown	156.542	4.3268	-158.334	3.25814	6.43866	149.669	5.17737	-171.562	3.34922	11.4	175.962	3.46579	-164.605	2.46437	5.83825
BRINP3	Unrelated|ENSG00000162670.11	BRINP3	3128	Unknown	74.844	6.69843	-167.304	4.09497	18.3906	23.851	3.32639	-127.184	2.34838	5.70042	56.4916	2.61989	-141.277	1.88509	4.29346
UCHL5	Host|ENSG00000116750.14	UCHL5	5327	Unknown	25.2582	8.79694	-133.716	6.49858	13.6106	22.3372	7.26572	-132.756	4.97619	13.4574	34.8108	4.73097	-136.795	3.32634	8.18899
UCHL5.1	OtherIntrons|ENSG00000116750.14	UCHL5.1	34556	Unknown	158.314	0.907114	-132.002	0.315648	Inf	127.128	1.12212	-134.75	0.513369	-6.03981	173.1	0.868335	-136.601	0.308121	-1.06132
Post|SCARNA18B|snoDB0042	Post|SCARNA18B|snoDB0042	Post|SCARNA18B|snoDB0042	5463	Unknown	15.848	0.957709	-69.1322	0.443845	Inf	31.8308	0.653676	-90.4828	0.120158	-0.190014	17242.6	0.00102733	-86.4745	NA	NA
Pre|SCARNA18B|snoDB0042	Pre|SCARNA18B|snoDB0042	Pre|SCARNA18B|snoDB0042	1769	Unknown	3.07804	3.55613	-73.7929	2.20005	9.27002	5.3517	2.10571	-73.3439	1.34057	4.90568	7.1634	1.08437	-76.4631	0.487593	-4.84265
GLRX2	Unrelated|ENSG00000023572.10	GLRX2	1131	Unknown	24.0191	6.00762	-122.727	4.4666	9.17205	29.6019	7.1874	-129.02	4.8219	14.1088	28.3496	3.85507	-121.817	2.63455	7.18261
ASPM	Host|ENSG00000066279.19	ASPM	11085	Unknown	193.42	2.47514	-153.536	1.71347	4.45585	55.2571	3.31391	-133.283	2.18522	6.85418	189.248	1.7947	-149.664	1.06261	5.76986
ASPM.1	OtherIntrons|ENSG00000066279.19	ASPM.1	51911	Unknown	214.785	1.6529	-149.905	0.981029	5.24501	65.1959	1.94256	-128.73	1.15961	5.98042	241.095	1.21904	-146.515	0.599949	-38.2126
Post||snoDB1416	Post||snoDB1416	Post||snoDB1416	3092	Unknown	5.29345	1.721	-73.3901	0.834601	Inf	2.89363	1.76862	-52.0881	0.940226	14.8693	7.73572	1.30509	-74.7594	0.536625	-3.02076
Pre||snoDB1416	Pre||snoDB1416	Pre||snoDB1416	1181	Unknown	6.11196	1.43755	-63.0346	0.775975	9.75116	3.69548	1.53238	-59.1521	0.567143	-2.18309	14.1977	0.698829	-67.0669	0.140002	-0.2336
ZBTB41	Unrelated|ENSG00000177888.8	ZBTB41	8595	Unknown	98.145	2.51886	-139.681	1.70302	4.83521	64.8486	3.54743	-137.825	2.28412	7.93766	120.327	1.95455	-140.774	1.18875	5.49354
DENND1B	Unrelated|ENSG00000213047.13	DENND1B	8365	Unknown	25.1107	4.71449	-122.08	3.33921	8.01592	12.2277	11.5912	-116.655	6.11538	110.83	29.0045	3.10475	-121.568	2.04987	6.39646
MIR181A1HG	Unrelated|ENSG00000229989.6	MIR181A1HG	3209	Unknown	172.206	0.144569	-98.7437	NA	NA	260.459	0.128627	-108.055	NA	NA	133.487	0.135585	-85.9412	NA	NA
ZNF281	Unrelated|ENSG00000162702.8	ZNF281	4891	Unknown	301.765	1.20947	-146.152	0.667606	6.42136	303.206	1.69797	-157.981	1.05506	4.34654	626.755	0.602624	-150.413	0.115103	-0.186253
KIF14	Unrelated|ENSG00000118193.12	KIF14	7291	Unknown	45.898	4.1177	-130.859	2.99241	6.59937	21.4808	3.92734	-119.462	2.72956	6.99836	54.3999	2.86534	-134.518	1.99585	5.07718
DDX59	Unrelated|ENSG00000118197.14	DDX59	2900	Unknown	66.3589	1.74803	-119.033	1.12694	3.89429	66.0459	2.27245	-123.071	1.48996	4.78588	58.6292	2.38746	-124.762	1.54094	5.29782
KIF21B	Unrelated|ENSG00000116852.15	KIF21B	9897	Unknown	3.06897	6.37867	-79.1512	4.51211	10.8791	8.33447	5.92051	-106.198	3.97459	11.5996	3.8907	3.11964	-81.1449	2.16601	5.57347
TMEM9	Unrelated|ENSG00000116857.17	TMEM9	1994	Unknown	49.9926	10.0028	-142.696	8.13808	12.9759	42.0836	9.02543	-144.351	6.35921	15.5415	44.422	8.78769	-149.734	5.75492	18.5781
ENSG00000286600	Unrelated|ENSG00000286600.1	ENSG00000286600	1196	Unknown	7.15751	19.9125	-132.069	12.5132	48.7226	10.0207	7.30485	-122.95	5.30745	11.7129	3.74743	5.89181	-116.036	4.37954	8.99929
LAD1	Unrelated|ENSG00000159166.15	LAD1	2627	Unknown	42.9194	20.5454	-173.965	13.2177	46.1067	57.6899	7.35057	-163.889	5.53744	10.9291	24.0412	6.26464	-152.685	4.95478	8.51593
PHLDA3	Unrelated|ENSG00000174307.7	PHLDA3	2749	Unknown	250.518	2.45978	-143.263	2.0066	3.17736	513.855	2.9904	-173.808	2.30722	4.24836	237.326	2.50721	-154.069	1.82249	4.01605
ENSG00000224818	Unrelated|ENSG00000224818.1	ENSG00000224818	598	Unknown	7.91513	2.89365	-73.092	2.21961	4.1556	21.0559	2.27958	-100.266	1.47586	5.0054	10.1281	1.92246	-83.0699	1.16021	5.60477
CSRP1	Unrelated|ENSG00000159176.14	CSRP1	2129	Unknown	119.208	11.7091	-166.729	9.55255	15.1232	125.419	8.53052	-167.282	6.4589	12.5585	120.84	8.27592	-171.228	6.19501	12.4619
ELF3-AS1	Unrelated|ENSG00000234678.2	ELF3-AS1	5296	Unknown	5.72345	5.74087	-100.519	3.58595	14.3858	4.30159	2.87722	-80.6089	2.18713	4.20353	6.3073	2.41571	-90.2516	1.56564	5.28544
ARL8A	Unrelated|ENSG00000143862.8	ARL8A	1789	Unknown	79.7115	3.7371	-136.766	2.85404	5.41144	131.011	4.24228	-155.174	2.91258	7.80603	109.576	2.6394	-144.248	1.89015	4.37272
UBE2T	Unrelated|ENSG00000077152.12	UBE2T	1079	Unknown	60.5452	3.59239	-130.319	2.70849	5.33269	27.2354	5.69436	-121.666	3.96977	10.0683	64.41	3.20583	-136.245	2.21007	5.83474
KDM5B	Unrelated|ENSG00000117139.18	KDM5B	9485	Unknown	293.61	3.94053	-174.465	2.85536	6.3562	342.495	3.16094	-175.283	2.24316	5.34975	338.118	2.69738	-175.967	1.79437	5.42999
TUBA5P	Unrelated|ENSG00000214796.9	TUBA5P	1982	Unknown	43.5006	1.94993	-109.124	1.33798	3.59352	34.1293	2.49805	-107.714	1.78108	4.18116	37.8202	1.92181	-109.907	1.23849	4.28724
RABIF	Unrelated|ENSG00000183155.5	RABIF	3119	Unknown	111.423	2.62078	-133.822	1.99797	3.80773	75.5892	5.91758	-139.505	4.21283	9.9398	137.69	2.51126	-146.158	1.66111	5.14394
KLHL12	Unrelated|ENSG00000117153.16	KLHL12	3311	Unknown	105.318	3.52191	-139.696	2.74294	4.91882	75.5314	4.55204	-139.484	3.20517	7.85129	115.402	3.39429	-147.435	2.40031	5.79329
ADIPOR1	Unrelated|ENSG00000159346.13	ADIPOR1	2091	Unknown	150.005	8.91792	-167.516	7.19037	11.7381	146.656	9.6171	-172.128	6.46003	18.8094	168.43	6.71288	-172.081	4.71462	11.6511
CYB5R1	Unrelated|ENSG00000159348.13	CYB5R1	1624	Unknown	53.4447	6.24394	-140.283	4.7666	9.04831	43.2767	10.2382	-140.439	6.99613	19.0802	47.0878	8.46599	-141.282	5.54384	17.9023
ETNK2	Unrelated|ENSG00000143845.15	ETNK2	2475	Unknown	4.46209	18.1827	-104.472	13.7923	26.6734	6.73839	10.6485	-112.601	7.03515	21.893	4.01947	9.02725	-104.038	6.20294	16.5734
GOLT1A	Unrelated|ENSG00000174567.8	GOLT1A	776	Unknown	6.75364	6.43437	-96.9332	4.62614	10.5633	5.34939	17.195	-90.4528	9.58307	83.5972	6.01022	9.26184	-99.8335	6.29636	17.5077
PLEKHA6	Unrelated|ENSG00000143850.16	PLEKHA6	7412	Unknown	114.123	4.43156	-148.782	3.42345	6.28119	35.858	5.82249	-133.374	4.17302	9.62823	72.5127	4.85212	-145.061	3.08988	11.2925
PPP1R15B	Unrelated|ENSG00000158615.10	PPP1R15B	5259	Unknown	1098.06	1.09242	-175.085	0.557412	27.1767	620.689	1.97077	-174.581	1.33949	3.72748	1058.22	1.10816	-178.69	0.562789	35.805
PIK3C2B	Unrelated|ENSG00000133056.14	PIK3C2B	7686	Unknown	102.535	5.8436	-150.85	4.60752	7.98607	99.8145	4.54799	-155.381	3.25863	7.5257	106.734	3.84057	-155.449	2.64466	7.01091
LRRN2	Unrelated|ENSG00000170382.12	LRRN2	3468	Unknown	6.52661	7.30706	-106.314	4.78807	15.4189	8.22877	4.07462	-98.3733	2.88463	6.93587	4.56148	2.21405	-82.809	1.40996	5.15246
RBBP5	Unrelated|ENSG00000117222.14	RBBP5	4367	Unknown	148.272	2.77765	-143.647	2.09707	4.11222	89.949	3.50907	-139.144	2.47162	6.04744	183.859	2.19479	-151.098	1.48989	4.1656
DSTYK	Unrelated|ENSG00000133059.17	DSTYK	8010	Unknown	157.338	2.57505	-142.897	1.93517	3.84714	148.634	3.40353	-153.656	2.36691	6.05575	184.626	2.24865	-148.743	1.53008	4.23983
NUAK2	Unrelated|ENSG00000163545.11	NUAK2	3391	Unknown	39.8473	1.48597	-115.474	0.712365	Inf	720.414	0.0893731	-110.954	NA	NA	51.0599	1.09803	-108.358	0.634996	4.05477
ELK4	Unrelated|ENSG00000158711.14	ELK4	10288	Unknown	138.003	6.20874	-165.185	4.63089	9.41751	117.461	5.82658	-162.728	4.04	10.4461	166.48	3.97119	-166.345	2.77595	6.97396
SLC45A3	Unrelated|ENSG00000158715.6	SLC45A3	3391	Unknown	8.23114	5.5874	-98.4266	4.00933	9.21403	7.63832	3.91947	-99.6944	2.85967	6.22737	11.2186	2.42941	-98.6667	1.77098	3.86719
NUCKS1	Host|ENSG00000069275.13	NUCKS1	6399	Unknown	392.063	10.6586	-204.331	7.84493	16.6195	202.238	8.64549	-186.712	5.80782	16.9053	321.146	8.37844	-201.639	5.50787	17.4979
NUCKS1.1	OtherIntrons|ENSG00000069275.13	NUCKS1.1	10627	Unknown	104.397	1.08938	-121.127	0.525402	Inf	73.3996	1.00443	-116.981	0.409166	-2.20834	136.047	0.799665	-125.614	0.257427	-0.722777
Post|SNORA72|snoDB0036	Post|SNORA72|snoDB0036	Post|SNORA72|snoDB0036	1599	Unknown	1105.98	0.0140495	-82.1509	NA	NA	122.394	0.115782	-84.1847	NA	NA	24.6362	0.639972	-79.603	0.174788	-0.385197
Pre|SNORA72|snoDB0036	Pre|SNORA72|snoDB0036	Pre|SNORA72|snoDB0036	18604	Unknown	2898.21	0.106728	-146.686	NA	NA	607.638	0.445135	-145.571	0.0234446	-0.026205	2212.71	0.146952	-151.733	NA	NA
RAB29	Unrelated|ENSG00000117280.13	RAB29	3308	Unknown	12.2456	10.3947	-126.866	7.08941	19.4738	21.3539	6.46122	-134.066	4.46218	11.705	15.4825	4.31738	-128.068	3.07945	7.21963
SLC41A1	Unrelated|ENSG00000133065.11	SLC41A1	5017	Unknown	67.8163	5.90599	-142.739	4.59186	8.27387	164.6	5.21533	-161.167	3.81952	8.21883	104.707	3.58307	-149.512	2.63979	5.5753
FAM72A	Unrelated|ENSG00000196550.11	FAM72A	2364	Unknown	30.6216	1.8449	-104.589	1.15811	4.53327	13.1375	3.12225	-98.8459	2.09563	6.12071	36.1076	1.52912	-110.421	0.871546	6.22821
EIF2D	Unrelated|ENSG00000143486.16	EIF2D	2011	Unknown	24.9441	15.1932	-133.242	12.5067	19.3495	12.9026	11.0959	-127.143	7.85409	18.8948	27.4471	10.3077	-143.346	7.25514	17.7945
C1orf116	Unrelated|ENSG00000182795.13	C1orf116	5501	Unknown	4.26409	1.64149	-61.1569	0.879576	12.2708	8.1676	2.4357	-100.786	1.63092	4.80845	0.986303	2.47844	-59.3902	1.5164	6.77958
YOD1	Unrelated|ENSG00000180667.11	YOD1	6396	Unknown	10.0734	0.580377	-61.7801	0.0587523	Inf	9.13368	0.91202	-66.2712	0.326105	-1.14474	14654	0.000378406	-65.9005	NA	NA
MIR29B2CHG	Unrelated|ENSG00000203709.13	MIR29B2CHG	15145	Unknown	31.8074	2.57715	-115.18	1.70129	5.31177	92.0381	0.839509	-122.998	0.350206	-2.11364	55.3168	1.1707	-113.848	0.606301	16.9388
PLXNA2	Unrelated|ENSG00000076356.7	PLXNA2	11508	Unknown	7.06881	6.1864	-93.918	4.60756	9.41128	8.50614	5.47163	-103.658	4.051	8.42676	6.53359	3.23604	-84.8599	2.24963	5.76296
LAMB3	Unrelated|ENSG00000196878.15	LAMB3	4305	Unknown	2.58817	26.8771	-103.478	18.8815	46.6177	5.04174	7.62455	-130.745	5.63703	11.7769	2.02562	8.1293	-91.653	6.39404	11.1572
C1orf74	Unrelated|ENSG00000162757.4	C1orf74	4684	Unknown	25.9251	2.23361	-103.516	1.5049	4.33057	18.3981	1.72532	-95.811	1.10947	3.87794	36.4517	1.34877	-100.711	0.881108	2.87445
ENSG00000289700	Unrelated|ENSG00000289700.1	ENSG00000289700	5789	Unknown	46.6596	2.95268	-115.129	2.29098	4.15182	51.0929	3.88066	-125.695	2.90885	5.82757	64.3503	2.32246	-124.894	1.64309	3.95962
IRF6	Unrelated|ENSG00000117595.13	IRF6	4478	Unknown	43.4278	3.76778	-121.552	2.9018	5.37049	65.0985	4.81684	-136.761	3.50078	7.71848	62.8865	3.21709	-132.001	2.25951	5.58334
KCNH1	Unrelated|ENSG00000143473.13	KCNH1	8140	Unknown	9.31195	3.19751	-106.418	1.67779	33.9371	3.00697	1.7988	-65.4582	1.2464	3.23054	4.53033	1.77596	-77.8031	1.12716	4.18469
ENSG00000284299	Unrelated|ENSG00000284299.1	ENSG00000284299	4455	Unknown	1.5878	10.3784	-84.2487	6.44659	26.6043	1.36245	3.48075	-78.764	1.8279	36.3468	1.88352	2.96208	-73.9752	1.82076	7.93783
SLC30A1	Unrelated|ENSG00000170385.10	SLC30A1	5893	Unknown	8808.43	0.0293912	-143.782	NA	NA	190.505	1.95442	-149.254	1.28368	4.09309	1002.56	0.305751	-148.711	0.00139746	-0.00141036
NEK2	Unrelated|ENSG00000117650.13	NEK2	2134	Unknown	25.0475	3.96305	-116.627	2.83569	6.57835	8.86026	6.014	-100.158	4.07963	11.4368	27.0476	3.93117	-117.278	2.64145	7.682
LPGAT1	Unrelated|ENSG00000123684.13	LPGAT1	7773	Unknown	16.9637	8.96207	-130.311	6.18669	16.2535	11.3068	11.1409	-118.59	6.53566	37.7185	16.6432	7.80047	-129.06	5.00988	17.6089
INTS7	Unrelated|ENSG00000143493.13	INTS7	4430	Unknown	54.1663	3.08183	-127.811	2.20366	5.12359	29.9685	4.13747	-118.261	3.05704	6.39901	55.9523	2.35719	-129.373	1.5514	4.90469
PACC1	Unrelated|ENSG00000065600.13	PACC1	2469	Unknown	10.1084	4.09923	-95.0001	2.95941	6.66707	11.5911	4.96798	-102.217	3.5796	8.11575	9.17015	2.91833	-95.9457	1.96722	5.64997
NSL1	Unrelated|ENSG00000117697.15	NSL1	13115	Unknown	18.6827	4.16383	-106.99	3.11314	6.28504	9.29908	6.02279	-100.738	3.92473	12.9404	21.5366	3.54616	-111.972	2.3834	6.92419
FLVCR1-DT	Unrelated|ENSG00000198468.11	FLVCR1-DT	2565	Unknown	2.45008	2.90642	-64.3452	1.73287	9.0046	1.51717	6.79549	-58.3157	4.25095	16.9286	1.39443	7.86526	-66.8421	3.58259	-40.2491
ANGEL2	Unrelated|ENSG00000174606.14	ANGEL2	4690	Unknown	17.3139	3.81571	-101.135	2.90162	5.57061	11.7761	3.46832	-96.1295	2.36885	6.47239	20.9087	2.56701	-107.845	1.72397	5.02367
PTPN14	Host|ENSG00000152104.12	PTPN14	13360	Unknown	110.995	2.77198	-136.67	2.0919	4.10726	122.93	2.37255	-141.897	1.67605	4.05954	126.505	2.01315	-141.016	1.30761	4.37228
PTPN14.1	OtherIntrons|ENSG00000152104.12	PTPN14.1	152553	Unknown	115.022	1.42893	-131.517	0.795689	6.99884	224.053	0.856683	-143.161	0.328756	-1.41406	146.172	1.10653	-134.529	0.560852	40.9104
Post||snoDB1302	Post||snoDB1302	Post||snoDB1302	36466	Unknown	19.3174	1.8919	-101.88	1.0492	9.61263	520.76	0.078531	-109.924	NA	NA	25.8462	1.21784	-96.479	0.625044	23.6087
GPATCH2	Unrelated|ENSG00000092978.11	GPATCH2	5859	Unknown	87.0134	2.3854	-134.008	1.63002	4.44553	56.1292	2.54458	-124.998	1.63436	5.74302	103.329	1.7228	-131.559	1.14155	3.50997
ZC3H11B	Unrelated|ENSG00000215817.9	ZC3H11B	4727	Unknown	17.5371	2.71112	-115.952	1.43018	25.9822	12.8075	4.17103	-104.461	2.41185	15.4137	23.4067	1.85251	-110.932	0.90163	-33.9154
EPRS1	Host|ENSG00000136628.18	EPRS1	4862	Unknown	76.2754	11.3591	-166.336	8.37205	17.66	84.9492	8.51921	-173.006	5.52847	18.5592	78.1858	7.6233	-165.645	5.37247	13.12
EPRS1.1	OtherIntrons|ENSG00000136628.18	EPRS1.1	71859	Unknown	10711.9	0.0122406	-128.03	NA	NA	204.851	0.693563	-134.15	0.168628	-0.328239	153.522	0.777607	-129.805	0.261998	-0.803322
BPNT1	Unrelated|ENSG00000162813.18	BPNT1	2737	Unknown	25.4289	8.36758	-127.319	6.52271	11.6676	1.86325	21.5549	-82.9136	8.0115	-31.2164	32.7745	6.01862	-133.271	4.31477	9.94628
RAB3GAP2	Host|ENSG00000118873.17	RAB3GAP2	7256	Unknown	38.2009	5.10665	-130.117	3.7877	7.8349	48.537	4.16496	-136.798	2.92984	7.2004	53.3136	2.97371	-136.297	2.03346	5.53136
RAB3GAP2.1	OtherIntrons|ENSG00000118873.17	RAB3GAP2.1	111383	Unknown	146.634	1.34454	-136.865	0.711333	12.242	204.491	1.09307	-144.034	0.514228	-8.69922	242.553	0.844225	-141.312	0.313756	-1.22227
Post|SNORA36B|snoDB0040	Post|SNORA36B|snoDB0040	Post|SNORA36B|snoDB0040	3717	Unknown	3.61062	3.24819	-76.7592	1.95016	9.71362	6.18674	1.76347	-79.8417	0.967128	9.98612	5.47869	1.85299	-65.7935	1.22799	3.77362
DUSP10	Unrelated|ENSG00000143507.18	DUSP10	2589	Unknown	37.266	1.54391	-100.562	0.978834	3.65247	58.4925	1.5462	-114.14	0.990009	3.5286	50.5321	1.16917	-104.016	0.608523	14.8602
TAF1A	Unrelated|ENSG00000143498.18	TAF1A	1966	Unknown	5.16896	4.21127	-82.2083	2.94702	7.37511	15.6545	2.06753	-93.6976	1.31362	4.85245	14.9662	1.84548	-93.1424	1.18469	4.17322
AIDA	Unrelated|ENSG00000186063.13	AIDA	2975	Unknown	27.725	9.06364	-136.59	6.70052	14.0017	29.5509	10.4596	-140.281	6.671	24.2076	28.5217	8.65854	-142.428	5.31675	23.3094
TLR5	Unrelated|ENSG00000187554.14	TLR5	4235	Unknown	5.64177	2.17404	-71.8485	1.34098	5.73979	5.09065	2.62927	-71.703	1.73933	5.38402	5.99051	2.07811	-79.5	1.14796	10.9529
SUSD4	Unrelated|ENSG00000143502.16	SUSD4	3480	Unknown	8.3436	13.7555	-120.809	9.72742	23.4772	2.26388	7.38897	-88.3553	5.04454	13.8046	5.77323	6.41384	-105.928	4.24405	13.1231
TP53BP2	Unrelated|ENSG00000143514.18	TP53BP2	4741	Unknown	82.4329	2.89863	-132.479	2.1544	4.42839	72.685	4.53783	-147.796	3.04929	8.86575	94.2206	2.32662	-138.316	1.58647	4.36138
NVL	Unrelated|ENSG00000143748.18	NVL	3003	Unknown	25.3414	6.50949	-123.612	4.95799	9.47426	18.6396	5.01778	-120.238	3.39219	9.63504	30.3257	3.59273	-123.938	2.50649	6.34055
WDR26	Unrelated|ENSG00000162923.17	WDR26	7367	Unknown	172.701	4.15444	-156.401	3.22834	5.82562	129.975	5.26616	-157.529	3.67837	9.26584	201.88	3.21011	-161.331	2.27059	5.47595
LBR	Unrelated|ENSG00000143815.15	LBR	3812	Unknown	57.8106	5.81242	-144.819	4.23621	9.2566	39.8323	4.88676	-136.866	3.47648	8.22226	55.1966	3.80333	-142.419	2.65289	6.71555
ENAH	Unrelated|ENSG00000154380.19	ENAH	13168	Unknown	100.388	8.28204	-164.48	6.17855	12.5571	92.845	6.63617	-159.116	4.7018	11.2747	95.7593	4.70915	-161.155	3.34251	7.96634
TMEM63A	Unrelated|ENSG00000196187.12	TMEM63A	4109	Unknown	25.5269	9.86182	-133.515	7.52649	14.2983	28.3591	7.42173	-135.046	5.22085	12.8305	32.7724	5.4549	-139.024	3.83252	9.45916
ENSG00000255835	Unrelated|ENSG00000255835.1	ENSG00000255835	1625	Unknown	10.2414	9.44033	-111.32	7.15145	13.884	13.9347	4.72491	-107.83	3.43176	7.58193	12.9491	5.53623	-109.452	3.99207	9.02854
PYCR2	Unrelated|ENSG00000143811.20	PYCR2	1680	Unknown	42.1322	7.25907	-135.651	5.67754	10.0619	37.7213	5.75154	-129.059	4.27424	8.7894	47.2851	4.71676	-135.39	3.56368	6.97295
SDE2	Unrelated|ENSG00000143751.10	SDE2	3987	Unknown	314.247	0.661877	-132.971	0.163113	Inf	151.008	1.32932	-127.747	0.821275	3.4854	291.331	0.759886	-137.887	0.236013	-0.623025
ACBD3	Host|ENSG00000182827.9	ACBD3	3584	Unknown	97.8409	3.0019	-135.269	2.28845	4.36172	110.247	4.11564	-152.379	2.8658	7.29882	107.284	2.51308	-141.049	1.70434	4.78243
ACBD3.1	OtherIntrons|ENSG00000182827.9	ACBD3.1	18090	Unknown	33.5065	1.67665	-106.352	0.988785	5.50929	75.329	1.03074	-119.259	0.43707	-2.87684	797.446	0.0789048	-112.973	NA	NA
Post||snoDB1194	Post||snoDB1194	Post||snoDB1194	7670	Unknown	8.8875	1.88853	-85.963	0.99297	19.251	24.5987	0.962422	-93.3667	0.386602	-1.96637	326.356	0.056402	-82.3697	NA	NA
Pre||snoDB1194	Pre||snoDB1194	Pre||snoDB1194	12683	Unknown	38.2093	0.949026	-93.5651	0.40146	Inf	53.1428	0.89728	-109.343	0.346494	-1.52185	50.0557	0.840947	-101.731	0.323807	-1.40846
LIN9	Unrelated|ENSG00000183814.16	LIN9	3567	Unknown	27.5464	1.88279	-106.615	1.11289	6.10909	16.1578	2.50815	-96.353	1.75092	4.41947	30.8481	1.72659	-109.751	1.03118	5.30255
PARP1	Host|ENSG00000143799.14	PARP1	3978	Unknown	128.421	12.0003	-174.829	9.32233	16.837	119.41	10.4185	-173.433	6.89911	21.2674	120.584	9.06731	-174.407	6.44318	15.2976
PARP1.1	OtherIntrons|ENSG00000143799.14	PARP1.1	38124	Unknown	70.2313	1.31381	-112.611	0.767432	4.56123	62.2838	1.42954	-114.759	0.857479	4.29468	75.3468	1.10054	-119.151	0.550066	-1480.86
Post||snoDB1291	Post||snoDB1291	Post||snoDB1291	2956	Unknown	1.99497	2.74077	-50.2303	1.8255	5.49669	3533.32	0.0015694	-62.5379	NA	NA	42.1142	0.138986	-62.4548	4.67781e-07	-4.67785e-07
ITPKB	Unrelated|ENSG00000143772.11	ITPKB	6269	Unknown	35.6556	5.19131	-134.681	3.596	9.33078	34.9836	3.0362	-132.303	2.15596	5.13118	28.8077	2.46761	-125.391	1.49733	7.01034
CDC42BPA	Unrelated|ENSG00000143776.20	CDC42BPA	10978	Unknown	44.1753	6.98559	-139.456	5.27789	10.3269	31.3159	6.67888	-135.482	4.20632	16.2039	46.9152	4.92526	-142.109	3.23859	10.2783
JMJD4	Unrelated|ENSG00000081692.13	JMJD4	2502	Unknown	18.0343	9.07907	-137.613	5.80191	20.8638	23.553	3.50762	-116.479	2.86286	4.52722	22.2474	2.8609	-111.579	2.34966	3.65649
WNT9A	Unrelated|ENSG00000143816.8	WNT9A	4005	Unknown	31.2007	1.92086	-100.406	1.31999	3.52584	28.8146	2.62272	-102.442	1.95559	3.98068	41.6073	1.31643	-103.717	0.774572	4.38165
C1orf35	Unrelated|ENSG00000143793.13	C1orf35	1290	Unknown	25.8165	4.48716	-110.672	3.55425	6.0841	17.7732	5.57183	-109.236	4.09446	8.71718	27.5977	3.51277	-119.443	2.49283	5.94525
MRPL55	Unrelated|ENSG00000162910.19	MRPL55	1423	Unknown	17.6834	9.35946	-110.23	7.94101	11.3948	19.5467	8.76142	-124.241	6.35973	14.0777	20.0824	5.57902	-117.013	4.36944	7.71463
OBSCN-AS1	Unrelated|ENSG00000162913.10	OBSCN-AS1	2893	Unknown	2.74586	4.37794	-75.9645	2.74199	10.8534	2.22849	4.69324	-73.6806	2.84424	13.4125	1.78338	21.8056	-87.4762	6.33382	-15.1141
TRIM11	Unrelated|ENSG00000154370.16	TRIM11	5774	Unknown	689.618	0.685089	-152.359	0.184876	Inf	285.189	2.28456	-156.824	1.67699	3.58251	351.79	1.11418	-150.886	0.618724	5.59224
RAB4A-AS1	Unrelated|ENSG00000177788.7	RAB4A-AS1	5952	Unknown	14.7902	5.81795	-111.577	4.26644	9.14275	11.8136	3.4208	-100.299	2.5198	5.32476	19.6505	2.781	-111.587	1.9586	4.79395
CCSAP	Unrelated|ENSG00000154429.11	CCSAP	5217	Unknown	51.1968	2.94555	-127.163	2.05113	5.22315	39.9951	5.20731	-131.33	3.43889	10.72	70.006	2.46249	-132.738	1.52673	6.36156
NUP133	Unrelated|ENSG00000069248.12	NUP133	5208	Unknown	45.1193	7.1249	-140.906	5.35746	10.6326	35.7009	4.35331	-130.164	3.09556	7.3326	51.1996	4.43382	-144.85	3.17386	7.35268
ABCB10	Unrelated|ENSG00000135776.5	ABCB10	3869	Unknown	10.5792	8.56078	-111.162	6.39338	12.9514	12.9485	5.97167	-116.338	4.02387	11.5744	15.4046	5.33065	-119.593	3.79289	8.96556
TAF5L	Unrelated|ENSG00000135801.11	TAF5L	4062	Unknown	132.465	2.14484	-137.698	1.50982	3.70174	101.447	3.12031	-139.673	2.25557	5.06036	170.554	1.73764	-145.676	1.09748	4.17002
PGBD5	Unrelated|ENSG00000177614.11	PGBD5	10914	Unknown	9.25355	2.05887	-77.4789	1.35085	4.32652	3.14203	15.9153	-76.0473	9.25117	56.9124	5.19382	2.42273	-75.1282	1.31565	15.2825
C1orf198	Unrelated|ENSG00000119280.17	C1orf198	3819	Unknown	60.9896	5.72757	-139.1	4.4675	7.97771	63.1109	5.46879	-143.373	4.04299	8.44807	66.221	4.00581	-144.533	2.85464	6.71284
TTC13	Unrelated|ENSG00000143643.13	TTC13	3276	Unknown	8.95657	10.2172	-108.343	7.86257	14.5851	9.44385	10.4044	-120.006	6.27372	30.4596	13.2242	7.01418	-121.255	4.84972	12.668
FAM89A	Unrelated|ENSG00000182118.8	FAM89A	1503	Unknown	4.69124	4.53258	-80.771	3.21221	7.69599	5.60721	3.75293	-93.7438	2.63628	6.51062	5.96085	1.94606	-81.1728	1.33598	3.58162
C1orf131	Unrelated|ENSG00000143633.13	C1orf131	2483	Unknown	28.8606	2.50997	-103.484	1.84229	3.93671	20.3322	3.37646	-108.983	2.34952	5.99816	23.7864	2.52263	-106.82	1.76254	4.43534
EGLN1	Unrelated|ENSG00000135766.9	EGLN1	4335	Unknown	55.6147	4.50463	-130.587	3.52418	6.24087	46.14	7.28575	-138.709	5.04095	13.1349	60.5306	3.75087	-135.692	2.6047	6.69844
ENSG00000287856	Unrelated|ENSG00000287856.1	ENSG00000287856	3288	Unknown	34.3865	4.49606	-122.847	3.38926	6.67629	25.9458	6.71942	-128.049	4.45279	13.6862	36.8098	3.54333	-125.446	2.42358	6.58642
ENSG00000233461	Unrelated|ENSG00000233461.6	ENSG00000233461	2172	Unknown	1.58843	13.5745	-85.1615	9.06192	27.0395	1.37488	10.217	-67.8102	6.33817	26.3311	1.68664	8.47082	-79.1055	5.54962	17.8851
SIPA1L2	Unrelated|ENSG00000116991.12	SIPA1L2	7105	Unknown	94.4405	3.40753	-135.799	2.66135	4.73515	85.0396	6.39568	-147.513	4.32909	12.2376	118.317	2.53341	-142.711	1.70578	4.92107
PCNX2	Unrelated|ENSG00000135749.19	PCNX2	7530	Unknown	10.9144	12.8438	-119.976	9.70128	18.9977	10.6624	10.0036	-114.685	6.48594	21.8582	12.9355	7.34473	-118.199	4.77181	15.9388
TARBP1	Unrelated|ENSG00000059588.10	TARBP1	5206	Unknown	8.76847	9.8955	-113.09	7.14764	16.0757	4.92142	6.35333	-98.1708	4.24595	12.614	10.7395	5.73796	-116.492	3.91917	10.7066
IRF2BP2	Unrelated|ENSG00000168264.11	IRF2BP2	5316	Unknown	286.354	1.90925	-160.523	1.18308	4.94362	223.826	2.02593	-156.796	1.45905	3.31321	346.022	1.21915	-155.884	0.793977	2.62462
TOMM20	Host|ENSG00000173726.11	TOMM20	3283	Unknown	47.1113	12.3123	-158.354	8.88793	20.0292	37.864	8.45801	-146.028	5.74899	15.9952	49.9892	6.67664	-156.826	4.74123	11.2821
TOMM20.1	OtherIntrons|ENSG00000173726.11	TOMM20.1	9992	Unknown	36.0255	1.62034	-113.092	0.846025	19.1164	93.5741	0.615136	-106.899	0.138621	-0.252361	62.1598	0.779774	-106.887	0.299341	-1.28894
Post|SNORA14B|snoDB0031	Post|SNORA14B|snoDB0031	Post|SNORA14B|snoDB0031	5430	Unknown	34.6502	1.21071	-104.548	0.538993	Inf	58.7342	0.866895	-114.065	0.329984	-1.38242	45.9618	0.775456	-104.701	0.283906	-1.06026
Pre|SNORA14B|snoDB0031	Pre|SNORA14B|snoDB0031	Pre|SNORA14B|snoDB0031	657	Unknown	2.46008	2.27285	-67.8368	1.07082	Inf	1.82379	6.67422	-69.2209	4.20576	16.1574	1.75815	3.17887	-67.1877	2.07105	6.83487
RBM34	Unrelated|ENSG00000188739.15	RBM34	1847	Unknown	28.1378	3.87865	-112.814	2.96206	5.61668	40.7445	4.29211	-128.445	3.04368	7.2769	27.821	2.85369	-114.321	1.97855	5.11703
ARID4B	Unrelated|ENSG00000054267.22	ARID4B	6022	Unknown	95.352	2.02296	-130.355	1.37196	3.84963	74.8615	2.70899	-138.56	1.73228	6.21091	99.7031	1.60877	-131.633	1.00698	3.99802
B3GALNT2	Unrelated|ENSG00000162885.14	B3GALNT2	4719	Unknown	19.8097	11.6	-133.959	8.59431	17.8387	22.3307	8.29901	-131.143	5.52544	16.6635	22.6206	6.49658	-133.674	4.54988	11.3548
LYST	Unrelated|ENSG00000143669.16	LYST	13466	Unknown	17.11	3.28646	-111.839	2.0582	8.15028	17.5113	7.82457	-116.958	4.55571	27.7004	14.3486	4.40713	-108.524	2.55295	16.1014
ERO1B	Unrelated|ENSG00000086619.15	ERO1B	4994	Unknown	1.03089	6.99355	-66.9797	4.17288	21.5819	0.893001	9.06077	-65.5485	4.73266	105.997	1.99628	6.34143	-74.1879	3.26199	113.321
HEATR1	Unrelated|ENSG00000119285.11	HEATR1	8459	Unknown	78.1865	7.27426	-165.434	4.79162	15.0956	81.6809	3.4519	-147.713	2.46797	5.74056	99.8365	3.09874	-157.535	2.29639	4.76285
FH	Unrelated|ENSG00000091483.8	FH	3166	Unknown	33.6403	11.9899	-146.795	8.93907	18.2023	33.6857	10.7069	-148.442	6.87894	24.1409	35.17	8.57621	-147.513	5.72505	17.0846
OPN3	Unrelated|ENSG00000054277.14	OPN3	2628	Unknown	7.21424	8.3842	-108.433	5.77027	15.3276	20.9956	4.21757	-124.73	3.07066	6.73202	10.4792	4.53667	-96.1076	3.2828	7.34035
CHML	Unrelated|ENSG00000203668.3	CHML	7711	Unknown	46.1572	7.29562	-145.99	5.25171	11.9442	47.1046	6.74502	-149.834	4.38841	14.5684	51.7887	4.15829	-142.841	2.8173	7.93538
LINC01347	Unrelated|ENSG00000214837.8	LINC01347	3841	Unknown	3.55175	3.18089	-58.1971	2.40858	4.68226	2.7038	5.05088	-68.8693	3.1992	11.9916	3.00288	3.65885	-64.1928	2.42457	7.45292
CEP170	Unrelated|ENSG00000143702.16	CEP170	7059	Unknown	24.6191	3.69068	-114.228	2.64092	6.12559	23.9014	4.37487	-120.123	2.8062	9.92034	35.652	1.93483	-114.442	1.26075	4.15796
ADSS2	Unrelated|ENSG00000035687.10	ADSS2	2555	Unknown	17.5007	9.77849	-135.075	6.5763	19.0587	5.27561	5.12235	-95.3164	3.64139	8.63365	23.7004	4.28636	-132.312	2.98179	7.62039
SMYD3	Unrelated|ENSG00000185420.19	SMYD3	1565	Unknown	5.86631	11.7428	-96.7053	9.41411	15.6022	2.06431	19.537	-75.0101	11.0443	84.5668	4.89231	11.1396	-99.1225	6.69799	33.0674
TFB2M	Unrelated|ENSG00000162851.8	TFB2M	1784	Unknown	22.5128	3.37798	-107.707	2.46779	5.3519	23.9559	3.74591	-116.067	2.53451	7.17558	19.7479	2.81119	-110.56	1.93122	5.16437
AHCTF1	Unrelated|ENSG00000153207.16	AHCTF1	8887	Unknown	138.494	2.8981	-152.493	1.96685	5.50416	148.296	2.70664	-153.909	1.91831	4.59492	192.57	1.52514	-148.699	0.988686	3.33431
ZNF670-ZNF695	Unrelated|ENSG00000135747.11	ZNF670-ZNF695	1042	Unknown	2.18528	5.68434	-65.436	4.15368	9.00144	1.28024	6.02927	-66.0124	3.36233	29.1525	3.64799	3.40874	-78.4606	2.09659	9.11061
ZNF695	Unrelated|ENSG00000197472.15	ZNF695	3341	Unknown	34.4375	2.19922	-107.928	1.5176	3.99236	21.5601	4.49767	-113.483	2.87403	10.3379	38.9498	2.09988	-116.971	1.31776	5.16604
ZNF670	Unrelated|ENSG00000277462.2	ZNF670	4197	Unknown	268.69	0.133501	-101.26	NA	NA	33.7802	1.57763	-102.906	0.964972	4.32098	324.049	0.108139	-99.8011	NA	NA
ZNF669	Unrelated|ENSG00000188295.15	ZNF669	1951	Unknown	64.4294	1.59246	-119.679	0.938649	5.24776	117.343	1.19325	-125.221	0.629023	11.5837	159.411	0.649762	-121.759	0.144857	-0.261417
ZNF124	Unrelated|ENSG00000196418.13	ZNF124	2776	Unknown	11.2775	26.8509	-140.954	18.3486	50.0369	17.4789	28.3448	-149.166	14.954	271.171	12.9846	22.4088	-142.405	12.326	123.129
ZNF731P	Unrelated|ENSG00000227671.4	ZNF731P	1465	Unknown	20.6756	3.08914	-107.164	2.14478	5.51935	36.832	2.59405	-118.056	1.60344	6.78715	22.7077	2.71479	-110.631	1.76013	5.93235
ZNF496	Unrelated|ENSG00000162714.13	ZNF496	5336	Unknown	68.6882	6.46156	-148.956	4.84242	9.7074	52.5104	4.66567	-137.304	3.56575	6.74686	65.3738	2.98963	-135.93	2.1886	4.71552
SH3BP5L	Unrelated|ENSG00000175137.11	SH3BP5L	3148	Unknown	75.8816	3.29912	-128.445	2.60291	4.50375	71.9807	9.51101	-149.982	6.26942	19.6936	86.2766	3.20541	-139.092	2.19949	5.90687
ZNF692	Unrelated|ENSG00000171163.16	ZNF692	2065	Unknown	21.652	3.56893	-95.8108	2.92924	4.56609	21.8362	3.89052	-106.134	2.96593	5.65267	18.5773	2.90457	-104.148	2.15142	4.46905
ACP1	Unrelated|ENSG00000143727.16	ACP1	1552	Unknown	47.1346	10.0406	-147.842	7.72338	14.3441	42.8236	10.7502	-149.503	7.19591	21.2423	50.3883	8.02347	-152.64	5.49758	14.8433
TRAPPC12	Unrelated|ENSG00000171853.16	TRAPPC12	2499	Unknown	53.0962	6.02475	-137.58	4.67408	8.47329	55.5091	4.92538	-137.208	3.78023	7.06585	49.818	3.33029	-126.784	2.50353	4.97233
RNASEH1-DT	Unrelated|ENSG00000234171.5	RNASEH1-DT	4368	Unknown	4.90681	7.87833	-93.8679	5.68317	12.8365	7.46911	5.52755	-104.71	3.69538	10.963	7.05488	4.16896	-99.6721	3.06884	6.49859
RPS7	Unrelated|ENSG00000171863.15	RPS7	987	Unknown	226.389	21.58	-202.366	16.1826	32.3799	78.6711	14.024	-179.016	9.58676	26.1084	202.972	13.2588	-201.545	9.18999	23.7932
RNF144A	Unrelated|ENSG00000151692.15	RNF144A	5720	Unknown	2.20602	2.92426	-66.518	1.60967	15.9517	0.925551	15.3339	-53.9329	7.78577	502.292	2.57592	5.93728	-80.4431	2.98879	440.38
ID2	Unrelated|ENSG00000115738.10	ID2	2041	Unknown	15226.2	0.0278976	-163.371	NA	NA	3288.3	0.137741	-155.032	NA	NA	220.783	2.25557	-162.943	1.09544	-38.1998
ASAP2	Unrelated|ENSG00000151693.11	ASAP2	5665	Unknown	65.8053	7.3303	-148.849	5.61251	10.5634	65.1762	6.54169	-154.679	4.59474	11.3519	76.9761	4.20201	-151.06	2.96554	7.20691
CPSF3	Unrelated|ENSG00000119203.14	CPSF3	3157	Unknown	53.9069	7.4379	-149.138	5.41871	11.8557	42.3977	5.27333	-144.408	3.70905	9.11937	52.168	4.43185	-145.824	3.18903	7.26196
IAH1	Unrelated|ENSG00000134330.19	IAH1	2176	Unknown	21.9961	12.3676	-133.824	9.54454	17.5622	22.1226	9.92198	-134.956	6.40502	22.0046	25.4779	8.17938	-137.487	5.70298	14.4571
TAF1B	Unrelated|ENSG00000115750.17	TAF1B	2267	Unknown	14.308	5.45273	-109.728	3.97507	8.67897	12.5332	4.25411	-104.722	3.10571	6.75011	14.6809	3.59354	-107.379	2.54106	6.13426
GRHL1	Host|ENSG00000134317.18	GRHL1	3568	Unknown	42.764	3.57514	-123.555	2.64712	5.50509	29.1139	3.10327	-113.154	2.23366	5.08163	44.7909	2.70012	-125.744	1.828	5.16366
GRHL1.1	OtherIntrons|ENSG00000134317.18	GRHL1.1	26275	Unknown	36.2641	1.91316	-112.01	1.16673	5.31075	32.6932	1.32779	-101.188	0.784089	4.33092	54.2614	1.14825	-110.833	0.5673	-47.7065
Pre||snoDB1423	Pre||snoDB1423	Pre||snoDB1423	10239	Unknown	12.7416	1.17126	-79.7328	0.507938	Inf	10.9013	1.08038	-83.7792	0.48089	-4.38071	16.4817	1.02063	-80.3995	0.462929	-4.98525
Post||snoDB1423	Post||snoDB1423	Post||snoDB1423	10252	Unknown	7.76328	1.60519	-76.5064	0.826597	27.6417	8.86278	0.93842	-59.5315	0.426816	-4.72398	11.8332	0.954857	-76.4581	0.335928	-1.13344
KLF11	Unrelated|ENSG00000172059.11	KLF11	4035	Unknown	53.9672	2.46245	-120.817	1.7454	4.17943	44.4474	2.90928	-129.509	2.08846	4.79305	85.8868	1.63847	-127.265	1.08333	3.36053
RRM2	Unrelated|ENSG00000171848.16	RRM2	3673	Unknown	162.448	8.24936	-183.255	5.64302	15.3297	47.8605	5.54967	-146.227	3.84299	9.98326	271.018	3.88415	-182.66	2.67386	7.09612
HPCAL1	Unrelated|ENSG00000115756.13	HPCAL1	1941	Unknown	47.8134	8.84125	-140.662	7.08259	11.7618	39.5351	9.15741	-135.961	6.47302	15.6458	42.7145	5.68713	-135.697	4.12183	9.16925
C2orf50	Unrelated|ENSG00000150873.12	C2orf50	7902	Unknown	1.67121	7.65518	-69.1514	5.40314	13.1262	4.57549	5.70615	-91.5413	3.82304	11.2452	1.8903	5.90389	-75.5067	3.63572	15.6957
SLC66A3	Unrelated|ENSG00000162976.13	SLC66A3	1784	Unknown	14.6517	12.4539	-130.191	9.02894	20.0652	15.5805	10.0523	-130.316	6.62087	20.8669	13.4428	9.46816	-127.702	6.15962	20.4556
GREB1	Unrelated|ENSG00000196208.14	GREB1	8555	Unknown	165.732	17.3634	-207.226	10.5893	48.1933	58.2066	5.33245	-169.404	3.94142	8.24085	94.2506	4.05666	-182.05	3.15924	5.66622
LPIN1	Unrelated|ENSG00000134324.12	LPIN1	5690	Unknown	103.604	2.5299	-131.416	1.9173	3.71779	72.5437	5.07	-140.91	3.68354	8.13012	111.791	2.44335	-138.5	1.72687	4.17596
TRIB2	Unrelated|ENSG00000071575.12	TRIB2	4344	Unknown	0.505812	11.0569	-65.579	6.0467	64.5002	1.42235	5.6674	-64.9771	3.05238	39.554	1.97506	3.21699	-63.4521	1.76544	18.0939
LRATD1	Unrelated|ENSG00000162981.14	LRATD1	6319	Unknown	149.239	3.41193	-162	2.23323	7.2256	136.438	2.95021	-147.95	2.18972	4.52	133.216	3.64813	-158.113	2.28681	9.01418
DDX1	Unrelated|ENSG00000079785.16	DDX1	2807	Unknown	59.9484	10.566	-159.989	7.69682	16.8456	62.2157	8.04359	-159.689	5.39874	15.7687	70.5349	6.37776	-160.164	4.44697	11.2717
GEN1	Unrelated|ENSG00000178295.15	GEN1	9957	Unknown	75.639	2.98633	-141.997	1.94236	6.45659	53.6613	3.21059	-136.188	2.13382	6.48102	84.4641	2.10749	-138.497	1.37786	4.47965
KCNS3	Unrelated|ENSG00000170745.12	KCNS3	2397	Unknown	4.23837	6.48203	-81.7734	4.87841	9.65619	2.04783	12.7443	-75.5655	6.93403	78.6378	4.90517	5.39122	-90.2993	3.22155	16.5115
KLHL29	Unrelated|ENSG00000119771.15	KLHL29	5325	Unknown	5.90867	3.82015	-88.2699	2.48169	8.29264	3.11668	6.23249	-74.0062	3.59888	23.237	5.46694	3.52263	-81.3551	2.06731	11.8995
UBXN2A	Unrelated|ENSG00000173960.14	UBXN2A	6022	Unknown	23.5824	5.07722	-116.966	3.82305	7.556	39.4276	7.30663	-140.681	4.782	15.4783	51.4343	4.09528	-138.562	2.73819	8.11937
FKBP1B	Unrelated|ENSG00000119782.14	FKBP1B	1010	Unknown	0.519346	12.4514	-49.5676	9.07506	19.8286	0.840238	7.79948	-69.3344	4.52719	28.1375	0.630483	15.0721	-63.5159	8.78609	52.969
NCOA1	Unrelated|ENSG00000084676.16	NCOA1	7405	Unknown	134.927	4.31338	-160.922	3.02619	7.5061	81.8875	11.1787	-157.507	6.68732	34.0428	84.1251	5.72919	-152.836	3.43232	17.3187
CENPO	Unrelated|ENSG00000138092.11	CENPO	4272	Unknown	233.54	2.68256	-159.578	1.88841	4.62944	80.8808	3.77637	-140.163	2.85018	5.59426	234.27	2.25274	-157.973	1.58717	3.87967
DNAJC27-AS1	Unrelated|ENSG00000224165.8	DNAJC27-AS1	4899	Unknown	2.66216	4.07472	-91.2727	1.80293	Inf	2.53708	7.49291	-70.3939	4.06514	47.7902	1.41019	69.3147	-80.8049	8.60172	-11.4414
EFR3B	Unrelated|ENSG00000084710.14	EFR3B	7486	Unknown	40.6092	7.56862	-127.857	6.30578	9.46394	13.6436	13.292	-108.433	8.02101	38.7694	38.5956	5.93034	-130.91	4.06062	10.9913
RAB10	Unrelated|ENSG00000084733.11	RAB10	3561	Unknown	157.767	7.63188	-168.797	5.95553	10.6216	148.065	7.9975	-172.856	5.44041	15.0901	163.143	5.46123	-172.215	3.83914	9.45694
HADHB	Unrelated|ENSG00000138029.14	HADHB	2142	Unknown	41.0298	16.7521	-159.842	12.2462	26.5039	43.0283	11.8566	-156.314	7.9285	23.4988	37.1776	10.8622	-154.917	7.38833	20.5016
SELENOI	Unrelated|ENSG00000138018.19	SELENOI	8066	Unknown	101.212	5.72839	-159.256	4.1105	9.44653	70.1531	3.86199	-140.873	2.84693	6.00193	132.957	3.29924	-159.677	2.34079	5.58677
SLC35F6	Unrelated|ENSG00000213699.9	SLC35F6	3902	Unknown	117.464	7.80201	-164.395	5.96575	11.2713	175.723	4.73769	-171.873	3.62685	6.82943	145.715	3.9348	-162.515	2.90941	6.0763
CENPA	Unrelated|ENSG00000115163.15	CENPA	1389	Unknown	83.2027	2.13026	-124.335	1.53477	3.48081	25.7016	3.2399	-107.91	2.40258	4.97306	96.9902	1.78254	-132.851	1.09159	4.85687
MAPRE3	Unrelated|ENSG00000084764.12	MAPRE3	1890	Unknown	26.3225	5.27262	-119.875	3.99705	7.74391	31.122	9.10885	-133.126	5.70589	22.5686	18.2876	5.90242	-118.228	3.63383	15.7103
TMEM214	Unrelated|ENSG00000119777.20	TMEM214	2978	Unknown	96.2398	8.31033	-151.373	6.89651	10.4533	76.8064	8.39794	-149.362	5.98588	14.0659	108.985	5.66949	-161.002	4.126	9.05797
AGBL5	Unrelated|ENSG00000084693.16	AGBL5	3188	Unknown	24.787	16.0846	-138.194	12.8212	21.5764	36.6647	11.0265	-149.23	7.68393	19.5163	27.966	11.1196	-145.22	7.60434	20.679
EMILIN1	Unrelated|ENSG00000138080.14	EMILIN1	3890	Unknown	1.28347	3.39863	-56.5569	1.92891	14.2763	2.38855	2.85827	-76.3805	1.54127	19.6424	1.6287	2.6656	-50.437	1.82634	4.93206
KHK	Unrelated|ENSG00000138030.13	KHK	2411	Unknown	9.20774	10.6725	-105.038	8.58224	14.1087	11.0986	7.58531	-108.087	5.71035	11.2934	11.2672	4.9239	-107.416	3.85787	6.80404
ATRAID	Unrelated|ENSG00000138085.18	ATRAID	1227	Unknown	38.6521	15.9787	-148.018	12.8139	21.2198	34.3069	12.9198	-143.288	9.22206	21.5676	42.0488	11.8706	-154.834	8.06867	22.4484
CAD	Unrelated|ENSG00000084774.14	CAD	7286	Unknown	129.851	11.2729	-183.499	7.87478	19.8299	141.961	4.68099	-162.758	3.80456	6.08206	167.552	4.61386	-176.288	3.60191	6.41657
GTF3C2-AS2	Unrelated|ENSG00000234072.1	GTF3C2-AS2	3060	Unknown	19.4559	3.58783	-102.077	2.73146	5.22645	28.2256	2.65992	-108.791	1.99137	4.00424	24.7784	2.02524	-107.033	1.46222	3.29331
SNX17	Unrelated|ENSG00000115234.11	SNX17	2400	Unknown	68.902	15.0078	-166.997	11.3661	22.0832	55.2393	7.18132	-149.252	5.52906	10.2419	58.7358	7.67288	-159.048	5.58057	12.2752
NRBP1	Unrelated|ENSG00000115216.14	NRBP1	2887	Unknown	314.148	6.57689	-174.726	5.43462	8.3271	324.417	6.33349	-179.085	4.49527	10.7152	318.864	5.9798	-185.441	4.14492	10.7296
KRTCAP3	Unrelated|ENSG00000157992.12	KRTCAP3	956	Unknown	8.79217	16.1587	-112.98	12.9259	21.548	10.3687	16.0936	-114.006	10.6884	32.5584	9.8909	11.0015	-118.611	8.19032	16.7511
ZNF512	Unrelated|ENSG00000243943.10	ZNF512	3703	Unknown	8.99466	4.83238	-95.8884	3.51139	7.74667	7.69719	3.91655	-90.2429	2.64872	7.51239	7.61245	3.78426	-95.9226	2.47179	8.06845
ENSG00000259080	Unrelated|ENSG00000259080.1	ENSG00000259080	1741	Unknown	7.34389	8.1544	-98.9751	6.23198	11.792	7.03426	6.27196	-97.1322	4.57992	9.94675	6.56962	6.46783	-101.617	4.24888	13.5379
GPN1	Unrelated|ENSG00000198522.14	GPN1	2496	Unknown	45.2611	9.48485	-146.996	7.19229	13.9228	51.8237	6.80507	-146.534	5.02096	10.5559	48.0304	5.92268	-147.546	4.19784	10.0535
SLC4A1AP	Unrelated|ENSG00000163798.14	SLC4A1AP	2901	Unknown	46.9816	4.79011	-132.19	3.60186	7.14835	50.568	7.79894	-145.51	4.92626	18.7086	57.7995	3.62261	-137.274	2.51849	6.45055
MRPL33	Unrelated|ENSG00000243147.8	MRPL33	508	Unknown	14.215	12.2036	-122.146	9.49925	17.0607	9.15951	12.9802	-111.201	8.11182	32.4628	12.7305	9.58784	-120.325	6.6193	17.384
BABAM2	Unrelated|ENSG00000158019.21	BABAM2	1852	Unknown	25.0018	14.3245	-142.111	10.8126	21.2151	9.76241	11.1021	-117.383	7.28381	23.3339	13.092	9.72533	-127.215	6.37318	20.5166
FOSL2	Unrelated|ENSG00000075426.12	FOSL2	6713	Unknown	435.492	2.39629	-181.271	1.44465	7.0216	468.757	1.66888	-161.676	1.15184	3.02818	486.241	1.22479	-162.95	0.743949	3.46318
PPP1CB	Unrelated|ENSG00000213639.11	PPP1CB	4916	Unknown	106.715	11.4371	-177.091	8.18846	18.9584	102.873	8.55535	-174.079	5.64412	17.669	109.104	7.66521	-174.824	5.03482	16.0508
WDR43	Host|ENSG00000163811.12	WDR43	3506	Unknown	153.117	3.4018	-166.203	2.10627	8.8377	182.158	2.91844	-168.173	2.07726	4.90445	179.82	1.8682	-160.744	1.28737	3.404
WDR43.1	OtherIntrons|ENSG00000163811.12	WDR43.1	43799	Unknown	12028.2	0.0218695	-154.627	NA	NA	2266.22	0.149225	-162.193	NA	NA	3228.73	0.0630208	-151.846	NA	NA
Pre||snoDB1255	Pre||snoDB1255	Pre||snoDB1255	1573	Unknown	7.75736	1.61692	-83.6462	0.718367	Inf	16.6792	0.814447	-87.8923	0.259387	-0.714494	8.01298	1.00868	-75.1537	0.505772	178.304
Post|SNORD53B|snoDB0091	Post|SNORD53B|snoDB0091	Post|SNORD53B|snoDB0091	1518	Unknown	4.0358	2.11136	-77.6792	0.976684	Inf	5.47068	1.70824	-80.0507	1.01325	5.4386	5.16034	1.02947	-68.6641	0.497964	-15.2845
CLIP4	Unrelated|ENSG00000115295.21	CLIP4	4963	Unknown	1.71612	8.81265	-83.3867	5.37963	24.3546	6.24646	3.09792	-89.2973	2.02191	6.62188	2.09336	2.63563	-70.836	1.74029	5.42844
YPEL5	Unrelated|ENSG00000119801.13	YPEL5	2560	Unknown	56.2225	4.13061	-141.366	2.80246	7.85179	53.3733	9.82689	-144.237	5.89718	29.4546	42.3985	6.42907	-137.929	3.75745	22.2475
SNORA10B	snoDB0084	SNORA10B	133	Unknown	0.252141	69.3147	-77.5321	32.6206	Inf	0.483076	69.3147	-105.746	13.7783	-22.8708	0.223756	69.3147	-84.9051	22.1855	-61.6497
LCLAT1	Unrelated|ENSG00000172954.14	LCLAT1	5060	Unknown	51.6204	6.10833	-137.627	4.72162	8.64827	25.0949	8.14303	-126.91	5.10331	20.1379	57.5632	4.4701	-143.348	3.05868	8.30025
EHD3	Unrelated|ENSG00000013016.16	EHD3	4825	Unknown	19.4802	5.89654	-111.399	4.64154	8.08172	16.0956	6.34085	-119.57	4.59552	10.2237	21.8667	4.66858	-119.224	3.15589	8.96634
SPAST	Unrelated|ENSG00000021574.13	SPAST	5268	Unknown	40.0504	4.50965	-127.296	3.37444	6.79588	21.401	6.65461	-119.12	4.28975	14.8302	35.9567	3.80431	-127.254	2.60405	7.0571
SLC30A6	Unrelated|ENSG00000152683.14	SLC30A6	5089	Unknown	66.8346	4.34039	-140.298	3.18879	6.79395	43.0213	3.95902	-134.561	2.87201	6.36998	71.283	2.9452	-138.68	2.07037	5.10035
YIPF4	Unrelated|ENSG00000119820.11	YIPF4	11955	Unknown	32.7453	5.66617	-130.467	4.13382	9.00376	37.9657	6.2132	-132.948	4.15298	12.3298	43.0854	5.07364	-136.744	3.34339	10.5156
BIRC6	Unrelated|ENSG00000115760.16	BIRC6	16190	Unknown	209.544	8.13355	-185.64	5.80512	13.5808	164.616	5.94497	-173.224	3.92377	12.2607	284.981	3.7857	-182.448	2.6885	6.39592
TTC27	Unrelated|ENSG00000018699.13	TTC27	2888	Unknown	18.0979	10.0014	-134.178	6.92687	17.9837	12.9186	5.51708	-115.903	3.80396	10.0375	17.1507	4.5769	-123.583	3.39259	7.0315
LTBP1	Unrelated|ENSG00000049323.16	LTBP1	6502	Unknown	23.5858	10.8954	-134.118	8.29653	15.8652	15.3867	9.91306	-124.173	6.86802	17.8089	30.6393	8.51546	-142.986	5.43141	19.7033
CRIM1	Unrelated|ENSG00000150938.10	CRIM1	6060	Unknown	22.3515	8.20941	-129.112	6.06573	12.6964	2.95696	12.0953	-82.6618	7.05523	42.3474	20.1035	4.22477	-119.952	3.01977	7.03002
GPATCH11	Unrelated|ENSG00000152133.17	GPATCH11	3839	Unknown	72.0092	1.61772	-122.555	0.962256	5.07403	45.1614	5.31415	-133.673	3.29373	13.7463	65.4387	1.8356	-121.871	1.06549	6.62134
CEBPZOS	Unrelated|ENSG00000218739.10	CEBPZOS	3152	Unknown	29.0178	6.72057	-131.747	4.90028	10.6924	31.6112	9.15254	-134.926	5.98744	19.4166	27.6269	7.07091	-134.47	4.63508	14.9025
NDUFAF7	Unrelated|ENSG00000003509.16	NDUFAF7	2184	Unknown	10.2466	6.5449	-103.915	4.88865	9.89842	12.3547	6.78614	-111.308	4.56128	13.2483	12.5465	4.16276	-106.715	3.0547	6.53229
CYP1B1-AS1	Unrelated|ENSG00000232973.14	CYP1B1-AS1	2596	Unknown	17.4018	1.00205	-82.1617	0.38665	Inf	10.0784	2.02049	-89.6131	1.01292	382.135	10.0167	1.46974	-76.6908	0.726908	-67.1096
GALM	Unrelated|ENSG00000143891.17	GALM	2277	Unknown	10.3068	12.2724	-116.492	9.37771	17.752	8.95768	9.03013	-115.436	6.0143	18.1125	11.4989	9.26143	-121.011	5.8344	22.4456
GEMIN6	Unrelated|ENSG00000152147.11	GEMIN6	3705	Unknown	30.811	3.5831	-114.846	2.67876	5.4092	31.5654	3.84514	-120.955	2.83153	5.98903	36.4118	2.7335	-119.314	2.00712	4.28381
MORN2	Unrelated|ENSG00000188010.16	MORN2	750	Unknown	4.01775	10.9436	-97.7846	7.80003	18.3319	5.96359	12.0568	-110.067	6.96612	44.783	3.62258	12.182	-98.7521	7.16104	40.7627
MAP4K3-DT	Unrelated|ENSG00000231312.8	MAP4K3-DT	4190	Unknown	1.02894	7.7899	-65.1311	4.98503	17.812	1.39816	3.16528	-63.126	1.82607	11.8722	0.809484	4.79497	-61.7319	3.26761	9.00336
EML4	Unrelated|ENSG00000143924.19	EML4	5546	Unknown	54.001	8.80168	-151.824	6.51199	13.5747	39.2312	6.47691	-142.266	4.45034	11.8924	61.8046	5.02165	-150.645	3.5853	8.37809
MTA3	Unrelated|ENSG00000057935.14	MTA3	5832	Unknown	44.3134	7.99025	-146.798	5.77884	12.9433	18.2973	7.12608	-123.118	4.54558	16.4839	41.0628	4.24469	-139.647	2.89868	7.92448
ENSG00000287387	Unrelated|ENSG00000287387.1	ENSG00000287387	2633	Unknown	2.42915	3.23636	-63.7665	2.05049	7.67522	5.12901	0.710778	-63.1769	0.189139	-0.404318	4.18465	1.70697	-68.0964	0.826974	-26.6255
PLEKHH2	Unrelated|ENSG00000152527.14	PLEKHH2	6994	Unknown	7.81871	9.9583	-110.422	7.19834	16.1507	8.92774	6.0096	-108.645	3.73285	15.4062	9.09651	5.03541	-103.292	3.23349	11.3735
DYNC2LI1	Unrelated|ENSG00000138036.18	DYNC2LI1	2903	Unknown	3.9735	7.24881	-90.0152	5.02801	12.9834	4.92551	7.89487	-98.3357	5.09418	17.5357	4.26452	6.28696	-93.7005	3.65729	22.3751
ENSG00000285542	Unrelated|ENSG00000285542.1	ENSG00000285542	3333	Unknown	37.1393	3.77834	-115.363	2.97801	5.16694	31.9418	5.14188	-123.914	3.58846	9.06688	45.5628	2.79146	-123.491	1.95306	4.89107
PPM1B	Unrelated|ENSG00000138032.21	PPM1B	3877	Unknown	66.6161	3.52686	-130.248	2.70803	5.05549	56.8484	4.50044	-137.24	3.09711	8.22914	81.8986	2.50992	-136.1	1.72322	4.6183
CAMKMT	Unrelated|ENSG00000143919.15	CAMKMT	1512	Unknown	3.50682	12.6236	-93.4431	9.42917	19.0912	1.66472	7.44482	-71.1179	3.92587	71.8243	4.05081	6.11552	-89.6276	3.82438	15.2541
PRKCE	Unrelated|ENSG00000171132.14	PRKCE	5749	Unknown	35.3737	4.28958	-132.88	2.84566	8.70826	18.014	3.16743	-108.795	2.15505	5.97373	38.9181	1.86035	-110.995	1.29248	3.31829
EPAS1	Unrelated|ENSG00000116016.14	EPAS1	5155	Unknown	79.3004	7.71427	-151.5	6.07679	10.5597	150.136	6.53034	-188.485	4.59613	11.2754	112.781	4.10001	-157.394	3.22058	5.64015
RHOQ	Unrelated|ENSG00000119729.12	RHOQ	4780	Unknown	33.2288	11.6083	-150.582	8.19511	19.8938	36.1965	8.97908	-155.428	5.77658	20.1503	29.4349	8.90432	-144.772	5.58962	21.8785
CRIPT	Unrelated|ENSG00000119878.6	CRIPT	6323	Unknown	15.5282	5.75201	-114.075	4.14164	9.41137	13.3317	7.57685	-111.787	4.79989	17.9778	16.38	6.03779	-116.23	3.81831	14.4194
SOCS5	Unrelated|ENSG00000171150.9	SOCS5	4771	Unknown	79.4247	2.09161	-127.434	1.41624	3.99831	62.5359	2.23139	-126.755	1.4536	4.79951	84.5608	1.47562	-126.516	0.875272	4.69788
TTC7A	Unrelated|ENSG00000068724.18	TTC7A	5095	Unknown	63.1114	7.49752	-144.218	5.96349	10.0941	58.1995	6.3558	-140.181	4.65563	10.0121	73.077	4.34127	-141.757	3.17997	6.83872
EPCAM	Unrelated|ENSG00000119888.11	EPCAM	1547	Unknown	115.729	12.6682	-178.899	9.31421	19.797	84.0619	10.874	-177.023	7.01505	24.1696	102.319	9.73371	-175.575	6.52326	19.1667
MSH2	Unrelated|ENSG00000095002.15	MSH2	7893	Unknown	59.8731	5.55428	-145.379	4.01015	9.03216	32.3507	5.91466	-130.511	4.03247	11.0919	67.6757	3.5572	-145.819	2.43681	6.58465
MSH6	Unrelated|ENSG00000116062.19	MSH6	7669	Unknown	240.434	2.92901	-161.433	2.10697	4.80286	101.085	3.39965	-145.562	2.37209	5.99784	280.163	2.06808	-163.068	1.40562	3.9116
FOXN2	Host|ENSG00000170802.17	FOXN2	5437	Unknown	74.5198	2.55458	-133.497	1.729	4.88903	66.4755	1.85764	-126.25	1.21688	3.92363	103.022	1.61823	-134.853	1.03184	3.74846
FOXN2.1	OtherIntrons|ENSG00000170802.17	FOXN2.1	55682	Unknown	98.7411	1.39122	-132.991	0.68051	Inf	163.019	0.881138	-137.662	0.357693	-1.90151	132.643	0.917887	-134.27	0.396106	-2.89301
PPP1R21	Unrelated|ENSG00000162869.16	PPP1R21	3173	Unknown	18.0996	8.16956	-123.116	6.08938	12.4084	26.1523	6.06156	-126.589	4.23153	10.6807	15.6833	4.93137	-119.502	3.29291	9.81508
STON1	Unrelated|ENSG00000243244.7	STON1	5614	Unknown	7.92342	4.52969	-115.632	2.21972	Inf	3.37464	11.2855	-89.8325	5.48856	-200.834	5.18104	69.3147	-112.395	7.8741	-10.189
STON1-GTF2A1L	Unrelated|ENSG00000068781.21	STON1-GTF2A1L	3824	Unknown	5.14651	4.71037	-104.941	2.37354	304.591	1.94759	14.3974	-80.9707	6.33089	-52.5174	3.36529	69.3147	-102.857	7.67633	-9.8603
CHAC2	Unrelated|ENSG00000143942.5	CHAC2	1309	Unknown	4.08538	9.18072	-97.8948	6.23995	17.3641	3.62853	5.25618	-89.7468	3.16556	15.4786	7.04551	3.35627	-94.9567	2.31857	6.07533
ERLEC1	Unrelated|ENSG00000068912.15	ERLEC1	3317	Unknown	23.8451	6.01462	-125.378	4.33432	9.82257	13.46	12.7981	-117.014	7.09518	65.2202	29.0704	5.64136	-129.504	3.5538	13.6732
ACYP2	Unrelated|ENSG00000170634.13	ACYP2	1913	Unknown	3.69919	4.47063	-87.9793	2.60744	15.6624	1.2298	10.8033	-63.8031	5.30599	-299.612	2.17208	13.6065	-79.2178	7.15305	139.112
SPTBN1	Unrelated|ENSG00000115306.16	SPTBN1	10226	Unknown	171.783	8.32532	-173.779	6.44567	11.7525	78.2151	8.43005	-162.213	5.76069	15.7094	139.62	7.55689	-174.468	4.92314	16.2504
EML6	Unrelated|ENSG00000214595.13	EML6	8436	Unknown	0.656249	13.1528	-60.3581	9.13192	23.5004	0.609835	69.3147	-70.7999	17.8817	-36.9426	1.05655	8.14072	-72.8588	4.38761	56.2936
RPS27A	Unrelated|ENSG00000143947.15	RPS27A	796	Unknown	51.3104	29.2287	-179.801	19.5483	57.9023	46.8914	20.353	-175.134	11.8236	73.051	44.3062	17.8105	-176.161	11.6687	37.6033
CFAP36	Host|ENSG00000163001.12	CFAP36	1575	Unknown	6.66565	10.627	-111.2	7.39718	18.8631	9.77289	10.5367	-121.085	6.49492	27.8975	5.26621	11.8874	-109.372	7.12269	35.9083
CFAP36.1	OtherIntrons|ENSG00000163001.12	CFAP36.1	19210	Unknown	13.3466	2.63988	-94.2585	1.76545	5.23062	25.8945	2.24251	-107.346	1.37477	6.08032	27.4223	1.32409	-99.5121	0.705319	10.7904
Pre||snoDB1538	Pre||snoDB1538	Pre||snoDB1538	3494	Unknown	2.15357	4.00395	-71.3201	2.36623	13.005	4.84958	2.53064	-72.7949	1.41109	12.2488	24.2742	0.295072	-64.8211	0.00115939	-0.00116857
ENSG00000271894	Unrelated|ENSG00000271894.1	ENSG00000271894	2289	Unknown	9.2192	2.21026	-86.0818	1.32373	6.69228	4.84668	3.15435	-73.6601	2.01185	7.29974	4.28409	1.84206	-67.0514	1.1239	5.10239
CCDC85A	Unrelated|ENSG00000055813.6	CCDC85A	4114	Unknown	21.0133	2.78659	-106.647	1.87292	5.44077	16.0831	2.86466	-103.971	1.88551	5.9593	10.9836	2.28396	-88.1232	1.56649	4.21403
VRK2	Unrelated|ENSG00000028116.18	VRK2	2657	Unknown	11.4835	7.72449	-114.679	5.51481	12.8888	11.7545	6.7066	-119.489	4.33372	14.8224	10.9099	4.59483	-107.508	3.0833	9.01349
PAPOLG	Unrelated|ENSG00000115421.13	PAPOLG	7348	Unknown	55.004	1.80369	-116.289	1.15617	4.09985	44.601	2.00313	-111.705	1.35689	3.82473	85.7966	1.19825	-123.197	0.61365	25.3126
REL	Unrelated|ENSG00000162924.16	REL	11255	Unknown	284.648	1.05844	-146.288	0.478488	Inf	152.975	1.86361	-147.032	1.11687	5.62354	192.722	1.3191	-142.575	0.740635	6.02433
PEX13	Unrelated|ENSG00000162928.9	PEX13	4472	Unknown	57.7298	3.61194	-128.532	2.74541	5.27774	50.8646	3.15951	-128.901	2.27018	5.19439	78.3508	2.2462	-131.227	1.58181	3.87287
SANBR	Host|ENSG00000162929.14	SANBR	4578	Unknown	9.80244	5.83867	-102.485	4.24831	9.3322	9.15186	7.0457	-106.6	4.64716	14.5612	9.66029	5.92003	-105.511	3.66248	15.4328
SANBR.1	OtherIntrons|ENSG00000162929.14	SANBR.1	66127	Unknown	37.8071	2.11347	-114.451	1.34338	4.9525	38.4021	1.95186	-115.195	1.25476	4.39181	46.0954	1.7106	-114.308	1.03393	4.95055
ENSG00000274769	Unrelated|ENSG00000274769.1	ENSG00000274769	1383	Unknown	4.67619	5.07249	-79.8714	3.74902	7.84021	2.53476	10.2996	-81.4998	6.68492	22.426	3.40487	5.08426	-80.7008	3.40783	10.0071
C2orf74	Unrelated|ENSG00000237651.8	C2orf74	1097	Unknown	4.64821	5.00747	-80.0781	3.67383	7.86119	2.61946	9.2638	-80.571	6.15839	18.6867	3.41438	5.25212	-81.6998	3.42779	11.2277
AHSA2P	Unrelated|ENSG00000173209.23	AHSA2P	6574	Unknown	45.3893	2.14846	-112.643	1.50142	3.77553	98.3573	1.79194	-132.171	1.08065	5.24285	53.1843	2.22109	-123.058	1.4198	5.0985
USP34-DT	Unrelated|ENSG00000270820.8	USP34-DT	2032	Unknown	3.36866	3.5485	-76.3546	2.17917	9.54862	7.02077	4.05738	-81.8349	2.85167	7.02949	4.4191	5.35981	-84.4916	2.96316	28.0349
COMMD1	Unrelated|ENSG00000173163.11	COMMD1	695	Unknown	8.67444	9.77232	-105.948	7.56306	13.8049	2.49283	11.8956	-83.294	6.41208	82.1422	5.82812	9.43029	-100.715	6.0446	21.4382
B3GNT2	Unrelated|ENSG00000170340.11	B3GNT2	2761	Unknown	101.788	1.47845	-125.485	0.895008	4.24692	93.7356	1.93122	-130.492	1.28734	3.8637	171.716	0.776578	-129.428	0.244558	-0.660671
EHBP1	Host|ENSG00000115504.15	EHBP1	5165	Unknown	41.6321	4.317	-124.25	3.32381	6.15668	19.9712	6.14679	-119.385	4.03498	12.8965	37.0776	3.01307	-120.346	2.1046	5.3015
EHBP1.1	OtherIntrons|ENSG00000115504.15	EHBP1.1	299454	Unknown	153.207	1.75059	-146.705	0.998118	7.113	147.972	1.34518	-146.195	0.661209	-39.0783	239.168	0.998646	-147.69	0.438973	-3.63195
Pre||snoDB1389	Pre||snoDB1389	Pre||snoDB1389	4220	Unknown	4.85407	2.08917	-79.0505	1.0236	Inf	5.69956	1.70981	-79.6756	0.740047	-5.50831	6.33655	1.51823	-78.6192	0.745992	-43.1558
Post||snoDB1389	Post||snoDB1389	Post||snoDB1389	63714	Unknown	30.5039	1.99274	-114.874	1.10801	9.88865	38.2616	1.18257	-110.33	0.490687	-2.8841	54.1995	0.936207	-111.116	0.39854	-2.68184
OTX1	Unrelated|ENSG00000115507.10	OTX1	2861	Unknown	23.6057	1.98877	-97.367	1.32663	3.97054	25.7092	1.88569	-106.39	1.15167	5.19982	26.2247	1.38447	-97.9628	0.834111	4.06981
MDH1	Unrelated|ENSG00000014641.21	MDH1	1647	Unknown	30.6126	15.7799	-152.256	11.4717	25.27	21.0821	10.5296	-144.79	7.11865	20.2162	33.0995	9.97828	-152.089	6.75844	19.0577
UGP2	Unrelated|ENSG00000169764.16	UGP2	2150	Unknown	34.0327	7.99395	-134.611	6.15044	11.4156	30.0535	7.40028	-135.192	4.83983	15.7131	30.0274	5.7633	-136.854	3.88762	11.1363
LGALSL	Unrelated|ENSG00000119862.13	LGALSL	3856	Unknown	9.74884	6.82792	-111.87	4.62802	13.0141	11.97	4.61966	-109.38	3.25442	7.95812	14.7343	2.50766	-113.515	1.60193	5.77005
AFTPH	Unrelated|ENSG00000119844.17	AFTPH	4102	Unknown	64.5295	3.42189	-133.17	2.50536	5.39583	73.9698	4.49867	-144.402	3.05343	8.54149	78.6193	2.68261	-138.01	1.76931	5.54477
SLC1A4	Unrelated|ENSG00000115902.11	SLC1A4	4563	Unknown	21.6548	5.96702	-118.798	4.49633	8.86744	16.7459	5.57292	-111.788	4.05656	8.89964	28.6532	3.21662	-116.233	2.48878	4.54612
CEP68	Unrelated|ENSG00000011523.14	CEP68	5803	Unknown	42.4397	2.87266	-113.313	2.20015	4.13727	45.0327	3.10477	-122.31	2.27349	4.89432	66.6297	2.13919	-125.683	1.50025	3.72609
ACTR2	Unrelated|ENSG00000138071.15	ACTR2	3783	Unknown	116.552	12.9139	-178.799	9.56427	19.8743	80.4172	9.96954	-169.656	6.66138	19.8051	98.8559	8.51911	-173.68	5.94792	15.0059
MEIS1	Unrelated|ENSG00000143995.20	MEIS1	5111	Unknown	27.9611	3.46265	-125.029	2.17408	8.50133	14.148	2.30183	-98.6289	1.46692	5.34267	44.4279	1.09589	-114.82	0.566731	16.5301
ETAA1	Unrelated|ENSG00000143971.9	ETAA1	4948	Unknown	25.1128	1.24419	-93.3122	0.619395	Inf	17.2152	2.01529	-97.317	1.13431	9.02331	38.0063	0.877129	-92.0394	0.32865	-1.31134
PNO1	Unrelated|ENSG00000115946.8	PNO1	2242	Unknown	25.4479	5.90832	-131.538	3.99739	11.3196	36.0114	5.11139	-136.53	3.41137	10.1889	28.5978	3.39658	-127.497	2.36502	6.02414
ANTXR1	Unrelated|ENSG00000169604.21	ANTXR1	5858	Unknown	6.23549	9.96831	-103.963	7.29229	15.7469	1.47487	11.2183	-74.5078	7.21606	25.1882	6.67697	10.741	-108.677	6.50823	30.7205
ANXA4	Unrelated|ENSG00000196975.16	ANXA4	2651	Unknown	19.5879	12.9408	-135.821	9.60672	19.8189	31.7235	9.82907	-149.138	6.77955	17.8649	17.558	10.6682	-134.259	7.03528	22.0597
GMCL1	Unrelated|ENSG00000087338.5	GMCL1	4161	Unknown	14.0021	7.18282	-116.622	5.19231	11.6483	11.8222	6.2881	-108.322	4.24016	12.1623	18.0853	4.42677	-119.065	2.88693	9.48694
SNRNP27	Unrelated|ENSG00000124380.11	SNRNP27	1425	Unknown	20.8475	5.19825	-112.635	3.99133	7.45148	16.5613	6.26689	-111.172	4.48388	10.4041	20.4716	4.19384	-114.642	2.98772	7.033
MXD1	Unrelated|ENSG00000059728.11	MXD1	5580	Unknown	140.498	1.36453	-133.497	0.766075	6.23612	82.8671	1.70962	-123.736	1.04274	4.74308	220.183	0.620521	-126.477	0.133995	-0.235856
PCYOX1	Unrelated|ENSG00000116005.12	PCYOX1	5339	Unknown	85.9614	7.41147	-161.676	5.31132	12.2587	60.6616	11.3378	-154.443	6.95301	30.6951	88.787	8.9292	-164.693	5.22825	30.5663
VAX2	Unrelated|ENSG00000116035.4	VAX2	1161	Unknown	1.9474	5.84952	-62.0418	4.33709	8.98159	2.41139	4.77254	-67.7142	3.38666	8.0783	1.75615	4.47033	-64.6955	2.91009	9.63742
NAGK	Unrelated|ENSG00000124357.13	NAGK	2371	Unknown	33.5492	7.32995	-124.558	6.01705	9.37567	30.9341	10.241	-131.422	6.83328	20.429	28.2787	8.5401	-133.996	5.41315	20.2208
MPHOSPH10	Unrelated|ENSG00000124383.11	MPHOSPH10	2565	Unknown	129.403	1.13404	-122.887	0.616059	7.12346	96.2646	2.70554	-138.912	1.76926	5.74654	146.314	0.95941	-124.462	0.455672	-9.09526
ZNF638	Unrelated|ENSG00000075292.19	ZNF638	6821	Unknown	130.56	3.72326	-151.821	2.74723	5.77499	109.65	4.33636	-154.078	2.80559	9.54327	144.98	3.15249	-155.926	2.09045	6.40812
ENSG00000281195	Unrelated|ENSG00000281195.1	ENSG00000281195	1615	Unknown	862.221	0.017485	-84.7345	NA	NA	16.6769	0.985654	-88.6305	0.29739	-0.749917	14.6389	1.15208	-82.5807	0.50887	-4.36398
SPR	Unrelated|ENSG00000116096.6	SPR	1432	Unknown	42.4388	10.1267	-135.661	8.44616	12.642	114.617	8.23048	-162.43	5.87475	13.7402	44.8434	8.26137	-146.819	5.95224	13.4977
SMYD5	Unrelated|ENSG00000135632.12	SMYD5	2554	Unknown	48.156	6.52525	-138.307	5.0077	9.36248	64.4724	6.27869	-140.321	4.78667	9.12206	53.537	4.23751	-141.676	3.14788	6.48086
CCT7	Unrelated|ENSG00000135624.17	CCT7	2031	Unknown	174.935	15.5306	-191.94	11.5249	23.8041	223.806	9.74632	-192.328	6.77084	17.3873	173.805	9.03923	-188.77	6.532	14.6702
ALMS1	Unrelated|ENSG00000116127.20	ALMS1	12844	Unknown	80.4759	7.22888	-158.242	5.25605	11.5726	48.5693	8.63007	-145.608	5.44268	20.8269	101.666	3.62753	-155.611	2.50152	6.59708
ALMS1-IT1	Unrelated|ENSG00000230002.3	ALMS1-IT1	2105	Unknown	1.43742	6.34101	-73.0042	3.75739	20.2984	4.17774	1.07483	-61.7432	0.297675	-0.667287	4.23635	1.24094	-61.0396	0.479122	-2.10319
STAMBP	Unrelated|ENSG00000124356.17	STAMBP	8034	Unknown	44.0442	6.81271	-136.02	5.28765	9.57403	51.6091	5.84579	-144.567	4.05623	10.4611	59.6237	4.30917	-141.749	3.05302	7.32164
DGUOK	Unrelated|ENSG00000114956.20	DGUOK	1075	Unknown	23.69	9.831	-130.503	7.58678	13.9607	27.5563	7.23546	-129.711	5.22847	11.7432	19.9707	8.33286	-132.742	5.71682	15.3631
TET3	Unrelated|ENSG00000187605.16	TET3	12060	Unknown	490.929	3.03476	-182.18	2.11868	5.34648	325.393	2.91356	-166.782	2.19476	4.33247	473.974	1.93603	-172.863	1.33312	3.53459
ENSG00000235499	Unrelated|ENSG00000235499.1	ENSG00000235499	390	Unknown	7.90237	3.60795	-96.4662	2.24525	9.17876	6.14082	3.47559	-78.8315	2.51679	5.6145	6.80546	2.39038	-80.5113	1.6845	4.11457
FNBP1P1	Unrelated|ENSG00000257800.1	FNBP1P1	1994	Unknown	13.4119	1.63069	-90.2754	0.841227	26.5018	7.07908	3.99875	-87.4464	2.7281	7.48505	9.95043	1.67541	-79.5335	0.968761	6.19218
MTHFD2	Unrelated|ENSG00000065911.13	MTHFD2	4403	Unknown	149.786	7.12508	-173.488	5.13983	11.6091	129.512	4.83414	-162.901	3.47863	7.92054	184.225	4.22646	-173.493	2.98143	7.25688
WDR54	Unrelated|ENSG00000005448.17	WDR54	1147	Unknown	10.7829	14.6144	-115.494	11.7433	19.3438	6.85078	11.261	-114.886	7.63237	21.4672	9.22415	11.9806	-122.646	8.17942	22.3821
INO80B	Unrelated|ENSG00000115274.15	INO80B	1181	Unknown	12.3774	12.4637	-129.266	8.7052	21.9339	11.1558	7.95668	-122.29	5.68767	13.2376	13.6391	4.62	-117.876	3.50951	6.75854
INO80B-WBP1	Host|ENSG00000274049.4	INO80B-WBP1	2040	Unknown	35.9739	12.8277	-136.263	10.744	15.914	33.4065	11.7372	-140.035	8.41325	19.4029	32.1739	10.3955	-142.9	7.01524	20.0627
Pre||snoDB1220	Pre||snoDB1220	Pre||snoDB1220	540	Unknown	2.6055	3.07487	-64.4842	1.92926	7.56992	1.64718	8.28686	-66.0212	4.85619	28.2301	0.905808	12.6646	-58.6288	6.33203	-137124
Post||snoDB1220	Post||snoDB1220	Post||snoDB1220	1203	Unknown	10.0512	2.50283	-90.214	1.56306	6.27654	8.07787	3.5034	-86.81	2.27184	7.65095	4.983	5.52997	-89.9761	3.02488	32.1816
TTC31	Unrelated|ENSG00000115282.21	TTC31	3358	Unknown	26.146	4.59632	-109.632	3.70108	6.06282	18.4755	6.84997	-107.346	4.94152	11.1601	33.5181	4.5039	-124.32	3.16763	7.79024
LBX2-AS1	Unrelated|ENSG00000257702.5	LBX2-AS1	1852	Unknown	3.40519	5.50655	-78.3448	3.88267	9.46532	6.53005	3.16427	-80.6361	2.32738	4.94099	5.25891	2.85917	-73.3801	2.08393	4.55291
HTRA2	Unrelated|ENSG00000115317.13	HTRA2	1785	Unknown	13.5674	10.0843	-122.267	7.42806	15.6975	18.1951	8.18356	-120.854	6.08719	12.4823	18.0396	4.99021	-118.971	3.65218	7.87554
DOK1	Unrelated|ENSG00000115325.14	DOK1	1955	Unknown	13.3892	3.03694	-84.9347	2.38111	4.19136	9.54879	4.93679	-91.7452	3.64288	7.65615	12.5239	2.6118	-98.2427	1.78347	4.87685
SEMA4F	Unrelated|ENSG00000135622.13	SEMA4F	6075	Unknown	12.904	6.25992	-108.349	4.67709	9.46211	16.3352	13.7802	-114.89	8.67849	33.4354	12.1981	8.61786	-112.254	5.24918	24.0556
HK2	Unrelated|ENSG00000159399.10	HK2	5626	Unknown	134.787	5.88492	-162.457	4.4293	8.76558	166.181	4.04853	-170.666	3.00515	6.2018	135.491	3.16381	-157.927	2.29399	5.09612
LINC01291	Unrelated|ENSG00000204792.2	LINC01291	3662	Unknown	8.32742	3.58369	-94.8948	2.32139	7.85498	17.9385	2.09949	-105.283	1.224	7.37346	6.11126	2.2718	-83.5022	1.40055	6.01126
LINC01293	Unrelated|ENSG00000230836.1	LINC01293	1266	Unknown	4.17113	9.94769	-96.1873	7.11772	16.5133	7.18407	4.57256	-106.511	2.89826	10.8276	3.85736	3.35037	-77.0054	2.49842	5.08398
POLE4	Unrelated|ENSG00000115350.12	POLE4	1097	Unknown	18.2587	15.2896	-132.311	11.9365	21.2628	13.1939	12.9296	-113.61	9.0078	22.8994	16.7507	10.6413	-131.595	7.43184	18.7298
MRPL19	Unrelated|ENSG00000115364.14	MRPL19	7825	Unknown	42.0008	9.14363	-149.079	6.58606	14.9487	42.6851	6.60293	-143.993	4.50589	12.3512	47.4787	4.98984	-146.559	3.56973	8.28629
TMSB10	Unrelated|ENSG00000034510.6	TMSB10	461	Unknown	133.678	19.2757	-182.345	15.2682	26.1354	214.172	26.586	-192.907	14.9561	119.545	156.073	18.2549	-192.223	11.9979	38.1508
KCMF1	Unrelated|ENSG00000176407.18	KCMF1	7500	Unknown	101.996	5.02082	-147.581	3.93869	6.92283	73.6885	5.43027	-147.134	3.81845	9.39681	109.261	3.11829	-148.395	2.16197	5.59175
TCF7L1	Unrelated|ENSG00000152284.5	TCF7L1	2985	Unknown	7.10035	9.09884	-107.502	6.46121	15.3755	2.14462	16.0578	-87.7607	8.46161	157.004	6.18873	6.09174	-98.7326	3.80158	15.3221
ELMOD3	Unrelated|ENSG00000115459.18	ELMOD3	2685	Unknown	24.0527	3.58798	-100.532	2.89869	4.70736	28.3511	6.2809	-122.009	4.56482	10.0645	26.8278	3.44313	-114.004	2.45295	5.77385
MAT2A	Unrelated|ENSG00000168906.13	MAT2A	2817	Unknown	364.456	3.52909	-184.535	2.30629	7.51188	335.1	2.44197	-166.43	1.73758	4.10677	556.918	1.63206	-176.582	1.09673	3.18832
VAMP8	Unrelated|ENSG00000118640.11	VAMP8	805	Unknown	47.2802	11.3296	-149.117	8.84039	15.7701	61.0011	10.8464	-159.765	7.2505	21.519	40.5698	10.9441	-153.917	7.25559	22.2606
VAMP5	Unrelated|ENSG00000168899.5	VAMP5	660	Unknown	2.42276	5.85365	-65.5017	4.42273	8.65332	2.66873	11.9363	-78.8002	8.47639	20.1688	1.71498	12.8548	-74.341	6.7262	144.671
RNF181	Unrelated|ENSG00000168894.10	RNF181	844	Unknown	30.4016	11.8675	-133.984	9.69974	15.2829	31.3316	9.68387	-141.738	6.88674	16.3073	25.7196	9.36902	-136.551	6.6686	15.7448
USP39	Unrelated|ENSG00000168883.20	USP39	2183	Unknown	53.0431	10.636	-155.622	7.88424	16.3387	36.9628	7.4513	-136.91	5.39155	12.0577	50.5632	5.74986	-147.134	4.25253	8.87465
PTCD3	Host|ENSG00000132300.19	PTCD3	6681	Unknown	39.7558	7.46618	-142.64	5.39478	12.1197	42.8814	4.64641	-133.669	3.41811	7.25261	51.5246	4.28531	-143.809	3.09662	6.95514
PTCD3.1	OtherIntrons|ENSG00000132300.19	PTCD3.1	27709	Unknown	77.429	1.34045	-123.867	0.674463	106.691	86.3869	0.9619	-121.921	0.432296	-4.27331	109.691	0.911357	-124.543	0.400726	-3.32293
Pre|SNORD94|snoDB0116	Pre|SNORD94|snoDB0116	Pre|SNORD94|snoDB0116	882	Unknown	6.09764	1.42253	-72.2372	0.623294	Inf	4.39564	1.9624	-73.0492	1.10518	8.74645	6.18605	1.72565	-73.3617	0.924182	12.9958
SNORD94	snoDB0116	SNORD94	137	Unknown	0.12949	44.3228	-60.0739	20.4977	Inf	0.301749	69.3147	-73.2415	17.6394	-35.9231	0.0782651	34.0194	-56.5252	14.6294	-104.542
MRPL35	Unrelated|ENSG00000132313.15	MRPL35	3723	Unknown	33.8307	6.23648	-128.572	4.79379	8.92135	23.9456	7.02072	-127.19	4.70757	13.8031	34.909	5.35481	-134.475	3.63461	10.1663
KDM3A	Unrelated|ENSG00000115548.17	KDM3A	4928	Unknown	71.848	2.91544	-134.492	2.04219	5.0934	64.8864	4.16644	-142.205	2.60074	10.4689	72.4908	2.90099	-136.72	1.82303	7.09807
RMND5A	Unrelated|ENSG00000153561.13	RMND5A	6183	Unknown	110.711	4.10693	-149.775	3.05598	6.25959	87.1707	5.35051	-148.349	3.71916	9.53126	116.858	3.39492	-151.019	2.25324	6.88182
ANAPC1P1	Unrelated|ENSG00000233673.7	ANAPC1P1	2145	Unknown	0.765038	10.2962	-57.2411	7.28189	17.5689	1.11318	2.79075	-44.3414	2.05227	4.35941	0.815708	6.85914	-60.5486	4.52859	14.1318
RGPD1	Unrelated|ENSG00000187627.17	RGPD1	6819	Unknown	7.45694	3.30731	-84.7973	2.29643	5.90804	9.50852	4.69291	-92.3625	3.05891	10.0745	9.38461	2.4512	-83.8134	1.64118	4.84003
ENSG00000204745	Unrelated|ENSG00000204745.4	ENSG00000204745	3795	Unknown	6.44472	11.4914	-110.504	8.1613	19.4124	6.50308	4.82231	-97.15	3.5596	7.4734	8.20715	4.71561	-109.374	3.47694	7.32525
CYTOR	Unrelated|ENSG00000222041.13	CYTOR	7512	Unknown	19.5928	4.52597	-110.627	3.37248	6.87868	14.1414	3.80048	-103.635	2.75258	6.13669	13.5456	3.78247	-104.98	2.71268	6.24549
ENSG00000284879	Unrelated|ENSG00000284879.1	ENSG00000284879	3525	Unknown	5.93541	8.50185	-92.643	6.63577	11.8281	7.43743	7.62317	-98.8211	5.21777	14.1432	7.10168	6.11083	-97.8434	4.30693	10.5148
ANAPC1P4	Unrelated|ENSG00000234231.4	ANAPC1P4	2070	Unknown	3.70542	9.44045	-87.9604	7.07567	14.1794	4.62428	6.61205	-88.6772	4.63067	11.5571	4.46952	5.90832	-86.0499	4.37518	9.09557
THNSL2	Unrelated|ENSG00000144115.18	THNSL2	2082	Unknown	8.14178	7.76374	-109.241	5.36045	14.0733	7.60473	9.20693	-102.063	6.50622	15.741	11.7217	11.4459	-117.189	7.00454	31.2786
EIF2AK3-DT	Unrelated|ENSG00000234028.4	EIF2AK3-DT	1616	Unknown	4.66981	1.38901	-54.1765	0.758996	8.1736	5.10065	2.25506	-72.4061	1.50504	4.49525	2.20267	2.56064	-58.6564	1.52096	8.09226
RPIA	Unrelated|ENSG00000153574.9	RPIA	1813	Unknown	11.2381	10.356	-122.845	7.23597	18.2061	8.55542	6.6894	-110.382	4.5202	12.8615	9.12488	5.76249	-114.423	4.17634	9.29124
ZNF2	Unrelated|ENSG00000275111.5	ZNF2	3885	Unknown	81.845	1.05962	-103.003	0.626081	3.44552	41.1371	1.85183	-106.26	1.19297	4.13616	735.368	0.119707	-114.545	NA	NA
ENSG00000233757	Unrelated|ENSG00000233757.7	ENSG00000233757	10100	Unknown	9.15844	4.26187	-103.141	2.71175	9.94901	21.2386	2.27767	-103.264	1.56458	4.1851	11.4425	2.4534	-94.6765	1.67147	4.61001
PROM2	Unrelated|ENSG00000155066.16	PROM2	4731	Unknown	24.3677	19.4961	-138.607	15.8367	25.3548	34.713	9.94156	-140.882	7.33546	15.4198	24.9372	11.6521	-142.247	8.63674	17.9024
KCNIP3	Unrelated|ENSG00000115041.14	KCNIP3	2891	Unknown	0.986528	21.6398	-86.9547	13.33	57.4597	1.10464	7.36765	-73.183	5.07583	13.4328	0.889247	7.05961	-80.6396	5.10468	11.4413
FAHD2A	Unrelated|ENSG00000115042.10	FAHD2A	4775	Unknown	14.6601	13.0551	-116.562	10.8225	16.4482	12.0335	11.2863	-103.522	8.41313	17.1398	16.7484	10.6263	-126.091	7.33289	19.2898
ENSG00000229689	Unrelated|ENSG00000229689.4	ENSG00000229689	3042	Unknown	11.943	3.56281	-104.69	2.26306	8.37002	13.115	3.82075	-107.186	2.45358	8.62895	8.9499	4.54689	-102.689	2.63407	16.6057
FAHD2CP	Unrelated|ENSG00000231584.10	FAHD2CP	1139	Unknown	4.15524	7.7529	-90.7104	5.51249	13.0613	3.37661	7.96326	-80.5771	5.05842	18.7044	5.8642	5.30287	-89.9259	3.55991	10.3898
STARD7-AS1	Host|ENSG00000204685.9	STARD7-AS1	3655	Unknown	8.92877	3.56114	-88.7775	2.55082	5.8967	5.32621	3.72119	-80.6701	2.4029	8.24412	14.5415	2.68361	-99.0803	1.69879	6.38525
Pre|SNORA112|snoDB0998	Pre|SNORA112|snoDB0998	Pre|SNORA112|snoDB0998	5659	Unknown	94.5652	0.251658	-90.7994	0.000351719	Inf	14.5561	1.63176	-88.9869	0.920406	7.18441	193.464	0.133759	-93.5549	NA	NA
Post|SNORA112|snoDB0998	Post|SNORA112|snoDB0998	Post|SNORA112|snoDB0998	23142	Unknown	2334.28	0.0211571	-103.049	NA	NA	270.066	0.138595	-94.3235	NA	NA	72.2363	0.791035	-109.969	0.247928	-0.664406
CIAO1	Unrelated|ENSG00000144021.3	CIAO1	3968	Unknown	78.3442	7.93789	-149.845	6.36366	10.547	83.1618	7.2636	-154.569	5.25763	11.7445	89.5186	4.86048	-152.921	3.60382	7.46276
NCAPH	Unrelated|ENSG00000121152.10	NCAPH	6030	Unknown	76.2265	4.17848	-143.334	3.03976	6.6814	22.4389	4.93979	-121.828	3.48895	8.45623	97.1714	2.8924	-146.384	2.00135	5.21369
ARID5A	Unrelated|ENSG00000196843.17	ARID5A	3079	Unknown	8.73699	3.95308	-101.733	2.44832	10.2574	22.5131	3.50753	-108.084	2.82363	4.6286	14.3991	2.08709	-99.8512	1.5012	3.42303
CNNM4	Unrelated|ENSG00000158158.12	CNNM4	4783	Unknown	206.305	3.02097	-147.915	2.42001	4.01899	206.737	5.20947	-160.544	3.90414	7.8261	259.805	2.41416	-159.158	1.58498	5.06272
CNNM3	Unrelated|ENSG00000168763.16	CNNM3	4900	Unknown	92.0793	4.50708	-135.472	3.73773	5.67525	50.3349	7.01756	-133.229	5.20569	10.764	93.9687	4.45159	-147.541	3.1561	7.55112
ANKRD36	Unrelated|ENSG00000135976.21	ANKRD36	7623	Unknown	20.8065	3.70945	-112.16	2.596	6.49537	12.0761	5.0243	-106.684	3.22264	11.3947	24.6734	2.87666	-113.273	1.89021	6.01653
COX5B	Unrelated|ENSG00000135940.7	COX5B	690	Unknown	30.6361	24.9448	-155.202	18.9	36.6744	31.4955	20.4149	-157.84	12.6944	52.1036	31.9617	14.9398	-157.789	10.1323	28.4288
INPP4A	Unrelated|ENSG00000040933.16	INPP4A	10096	Unknown	33.7682	6.44117	-127.554	5.03325	8.94263	30.6995	8.28114	-130.181	5.70159	15.1233	32.0117	4.68188	-125.516	3.30272	8.03872
UNC50	Unrelated|ENSG00000115446.12	UNC50	2172	Unknown	22.4992	2.63376	-102.352	1.86389	4.48717	17.257	4.26191	-102.344	2.9816	7.46921	23.9262	2.97479	-109.475	2.06067	5.34654
ENSG00000241962	Unrelated|ENSG00000241962.9	ENSG00000241962	1947	Unknown	10.1546	8.7938	-112.158	6.47347	13.7068	14.2146	8.88257	-116.826	5.56652	21.971	10.0323	7.17185	-112.154	4.88099	13.5151
C2orf15	Unrelated|ENSG00000273045.7	C2orf15	1627	Unknown	9.1137	4.87323	-97.3247	3.50412	7.99827	6.43136	8.2364	-93.9208	5.42907	17.0559	8.27483	4.09691	-97.787	2.67985	8.69437
LIPT1	Unrelated|ENSG00000144182.17	LIPT1	1424	Unknown	14.1947	1.66481	-84.785	0.992244	5.16742	17.4432	2.43467	-97.9851	1.54867	5.68988	15.4735	1.62089	-84.6366	0.980032	4.68356
ENSG00000273155	Unrelated|ENSG00000273155.1	ENSG00000273155	669	Unknown	3.64208	8.10075	-84.0114	6.06495	12.1938	5.38993	10.7404	-94.4055	6.12125	43.7684	3.57805	7.74624	-89.103	4.92493	18.1352
MRPL30	Unrelated|ENSG00000185414.20	MRPL30	4435	Unknown	43.3607	8.9058	-139.295	7.08616	11.9828	48.645	7.26635	-140.516	5.01897	13.1584	45.0594	6.65129	-144.234	4.75145	11.0826
EIF5B	Unrelated|ENSG00000158417.11	EIF5B	5741	Unknown	50.4932	6.52901	-144.12	4.77273	10.3304	82.3386	5.44285	-156.128	3.65552	10.6501	70.48	3.84018	-145.803	2.81732	6.02913
PDCL3	Unrelated|ENSG00000115539.14	PDCL3	1038	Unknown	12.0378	10.4696	-117.608	7.92976	15.4032	21.0131	8.71369	-131.92	5.84987	17.0707	13.0706	5.96732	-120.206	4.30871	9.70207
NPAS2	Unrelated|ENSG00000170485.17	NPAS2	4020	Unknown	3.71382	8.86755	-81.6169	6.96988	12.1852	6.37223	11.355	-102.783	7.11401	28.1167	2.79095	4.56607	-78.4855	3.12309	8.48769
RPL31	Unrelated|ENSG00000071082.11	RPL31	2328	Unknown	83.5975	23.0818	-182.165	16.7854	36.9377	84.2842	20.0741	-179.868	12.0984	58.9083	81.6583	15.8331	-182.827	10.5847	31.4057
TBC1D8-AS1	Unrelated|ENSG00000272902.2	TBC1D8-AS1	2478	Unknown	1.68209	2.85448	-55.3975	1.6825	9.4074	1.80404	3.51016	-72.3784	1.90936	21.7202	1.45742	6.47581	-68.4054	3.01717	-44.2589
CNOT11	Unrelated|ENSG00000158435.8	CNOT11	2515	Unknown	78.2666	7.10389	-151.931	5.45631	10.1769	60.6546	5.32509	-142.997	3.90087	8.38734	84.9633	4.42965	-153.428	3.15821	7.41464
MAP4K4	Unrelated|ENSG00000071054.17	MAP4K4	7970	Unknown	62.1975	10.0037	-150.541	7.96894	13.4339	8.14179	10.2237	-103.606	6.60416	22.6226	52.9311	7.70664	-151.629	5.2129	14.7744
IL1R1	Unrelated|ENSG00000115594.12	IL1R1	5183	Unknown	13.1882	8.08217	-118.522	5.80914	13.2775	12.3993	8.65539	-114.665	5.82643	16.8242	10.11	6.30883	-111.889	3.94747	15.7013
SLC9A2	Unrelated|ENSG00000115616.3	SLC9A2	5601	Unknown	47.3606	4.6348	-130.184	3.53359	6.73311	24.2536	5.09431	-120.974	3.61977	8.59589	34.7555	3.06771	-123.267	2.19541	5.09022
TMEM182	Unrelated|ENSG00000170417.16	TMEM182	3588	Unknown	4.14728	4.90215	-79.3121	3.49422	8.21032	3.02361	4.49837	-76.7286	2.74415	12.4699	9.197	1.58937	-77.2219	0.964883	4.50517
MRPS9	Unrelated|ENSG00000135972.9	MRPS9	1414	Unknown	20.937	8.4063	-129.83	6.09293	13.5516	22.1233	6.52285	-128.552	4.40571	12.5571	20.6711	5.12937	-123.875	3.65271	8.61013
C2orf49	Unrelated|ENSG00000135974.10	C2orf49	4587	Unknown	39.8073	2.90782	-118.347	2.08403	4.80862	28.1803	4.2487	-121.402	2.8007	8.79669	64.5917	1.81746	-126.049	1.17303	4.03315
NCK2	Unrelated|ENSG00000071051.14	NCK2	2666	Unknown	38.0976	5.2499	-121.983	4.2276	6.92431	43.1169	6.11991	-135.702	4.35806	10.2731	37.6498	3.6546	-126.231	2.5353	6.54342
RGPD4	Unrelated|ENSG00000196862.10	RGPD4	7212	Unknown	6.56348	3.71876	-80.5101	2.72916	5.83426	6.49038	4.54879	-87.7827	2.82403	11.6859	7.36803	2.81166	-80.4254	1.99858	4.74004
GCC2	Unrelated|ENSG00000135968.22	GCC2	6909	Unknown	37.123	3.46063	-126.923	2.33284	6.69939	46.278	3.27553	-134.457	2.14536	6.92208	34.1106	3.17544	-126.999	1.86088	10.8162
LIMS1	Unrelated|ENSG00000169756.17	LIMS1	4392	Unknown	23.3153	7.51466	-128.815	5.50269	11.8459	15.0365	7.40947	-118.455	5.09596	13.5702	18.8664	6.07668	-123.548	3.98561	12.7837
RANBP2	Unrelated|ENSG00000153201.17	RANBP2	11708	Unknown	164.257	4.36782	-160.948	3.24738	6.66873	133.105	4.1074	-158.859	2.72288	8.3565	210.569	2.73231	-162.703	1.94966	4.56475
CCDC138	Unrelated|ENSG00000163006.12	CCDC138	2375	Unknown	6.39723	6.0685	-95.8218	4.27977	10.4261	5.10777	6.57868	-98.7189	4.11604	16.3772	8.2369	4.23198	-98.4497	2.80425	8.6214
RGPD5	Unrelated|ENSG00000015568.13	RGPD5	7268	Unknown	34.3224	3.18828	-123.562	2.11982	6.42835	41.0314	4.59264	-128.49	2.9269	10.6585	41.4719	2.45864	-123.166	1.53995	6.09433
LIMS3	Unrelated|ENSG00000256977.13	LIMS3	2094	Unknown	1.6376	5.63927	-57.6267	4.15253	8.78436	1.03361	6.88563	-58.4668	4.55168	14.1321	1.15617	4.9023	-55.0535	3.2598	9.88096
ENSG00000284337	Unrelated|ENSG00000284337.1	ENSG00000284337	3202	Unknown	1.39806	5.78459	-56.7887	4.14757	9.55645	0.783416	8.00111	-53.8351	5.2326	16.9906	1.03314	4.62996	-49.7911	3.19983	8.37149
LINC01123	Unrelated|ENSG00000204588.5	LINC01123	2436	Unknown	35.3314	3.29276	-120.752	2.32225	5.65687	34.0713	2.7013	-119.251	1.93588	4.46779	30.4406	2.20628	-113.835	1.64451	3.35097
BCL2L11	Unrelated|ENSG00000153094.24	BCL2L11	5231	Unknown	19289.8	0.0126575	-137.204	NA	NA	328.574	1.32156	-150.726	0.727257	7.22908	315.009	0.81766	-141.793	0.283687	-0.926773
MERTK	Unrelated|ENSG00000153208.18	MERTK	3826	Unknown	2.31176	6.94568	-76.2404	4.80188	12.5476	5.42571	4.29635	-95.1745	3.00461	7.53638	1.4616	3.32332	-65.9201	1.98504	10.2001
TMEM87B	Unrelated|ENSG00000153214.11	TMEM87B	5162	Unknown	36.2427	6.52797	-133.861	4.89197	9.80802	13.0391	7.471	-110.485	4.83607	16.4144	33.029	5.11137	-132.678	3.38047	10.4748
ZC3H6	Unrelated|ENSG00000188177.14	ZC3H6	11539	Unknown	24.8946	1.98855	-108.806	1.12822	8.37455	16.4116	3.5268	-100.618	2.21977	8.57707	19.2429	3.44827	-105.19	2.10314	9.56744
TTL	Unrelated|ENSG00000114999.8	TTL	14267	Unknown	47.1468	9.83263	-150.08	7.35988	14.8077	53.8167	7.70084	-146.863	5.24619	14.4723	53.5006	6.03724	-148.18	4.20904	10.6731
POLR1B	Unrelated|ENSG00000125630.16	POLR1B	7527	Unknown	112.345	3.46414	-158.296	2.17912	8.44298	80.2047	3.34968	-148.049	2.44645	5.31019	126.612	1.83563	-148.739	1.30472	3.09507
CHCHD5	Unrelated|ENSG00000125611.16	CHCHD5	3272	Unknown	5.91494	16.2418	-103.58	12.9899	21.6656	6.48172	10.1894	-103.552	6.84105	19.9579	6.92346	10.6011	-112.879	7.52986	17.9036
SLC20A1	Unrelated|ENSG00000144136.11	SLC20A1	3297	Unknown	103.407	3.72454	-155.747	2.43739	7.89243	101.46	2.50052	-140.825	1.87114	3.76788	122.288	1.82494	-140.95	1.32225	2.94432
PSD4	Unrelated|ENSG00000125637.16	PSD4	11342	Unknown	127.022	5.1506	-159.302	3.81465	7.92665	60.1176	7.02422	-142.873	4.85794	12.6774	112.275	6.84165	-163.358	4.11252	20.3388
PAX8-AS1	Unrelated|ENSG00000189223.15	PAX8-AS1	11799	Unknown	32.5179	5.70553	-125.855	4.36926	8.21927	32.4075	6.20937	-129.298	4.27587	11.3349	34.6509	5.20644	-130.968	3.64007	9.13911
CBWD2	Unrelated|ENSG00000136682.16	CBWD2	1827	Unknown	12.8258	8.23064	-107.913	6.56369	11.0325	7.30679	10.3822	-101.363	7.08683	19.4061	9.62337	8.79373	-112.045	5.95075	16.8382
WASH2P	Unrelated|ENSG00000146556.16	WASH2P	1757	Unknown	14.2423	4.51576	-82.0828	3.94878	5.27286	13.9103	6.46226	-101.757	4.86551	9.619	15.0535	4.13068	-99.5588	3.00002	6.62905
RABL2A	Unrelated|ENSG00000144134.19	RABL2A	2282	Unknown	4.60473	6.4167	-80.0729	4.99434	8.97181	7.34565	5.86036	-84.5183	4.23211	9.52496	5.25213	6.20899	-87.7067	4.14364	12.3793
ACTR3	Unrelated|ENSG00000115091.12	ACTR3	6589	Unknown	88.1388	9.65987	-166.534	7.0876	15.1628	78.4091	7.02752	-164.069	4.79574	13.1446	87.1996	7.18099	-166.483	4.73768	14.8282
DDX18	Unrelated|ENSG00000088205.13	DDX18	3753	Unknown	66.7561	5.25816	-143.494	3.93097	7.9383	76.9729	5.14154	-152.962	3.51524	9.56826	69.6205	3.89211	-145.941	2.74445	6.6895
INSIG2	Unrelated|ENSG00000125629.16	INSIG2	3562	Unknown	13.9004	3.43752	-100.01	2.4137	5.96972	6.13935	7.275	-93.7817	4.42089	20.5274	16.3663	3.27078	-102.724	2.04677	8.13676
STEAP3	Unrelated|ENSG00000115107.20	STEAP3	4259	Unknown	17.7184	15.517	-144.877	10.4617	30.0258	24.7264	6.10489	-136.477	4.55857	9.23879	13.2607	4.85314	-126.083	3.76504	6.82579
DBI	Unrelated|ENSG00000155368.18	DBI	740	Unknown	28.4286	21.071	-157.617	14.8671	36.1603	26.4845	17.4182	-155.326	10.1223	62.3817	25.9725	13.3838	-154.874	8.97506	26.3054
TMEM37	Unrelated|ENSG00000171227.7	TMEM37	1687	Unknown	7.34718	4.42626	-90.7547	3.14329	7.47881	1.82341	3.53067	-69.1039	2.64904	5.29188	5.29144	2.29034	-76.2105	1.44168	5.56795
TMEM177	Unrelated|ENSG00000144120.13	TMEM177	1738	Unknown	60.6414	1.5502	-110.255	1.01522	3.27708	32.6149	2.35969	-108.282	1.66113	4.07218	64.7692	1.36345	-117.295	0.806894	4.3946
PTPN4	Host|ENSG00000088179.9	PTPN4	11090	Unknown	36.2797	4.41231	-126.996	3.20791	7.06476	21.0513	7.17424	-120.237	4.64357	15.767	47.1113	2.81393	-126.913	1.86886	5.69267
PTPN4.1	OtherIntrons|ENSG00000088179.9	PTPN4.1	209062	Unknown	185.04	1.51237	-148.637	0.796826	14.826	240.761	1.05333	-150.412	0.458984	-3.57164	381.434	0.695437	-149.451	0.175125	-0.35282
EPB41L5	Unrelated|ENSG00000115109.14	EPB41L5	6556	Unknown	76.5008	8.30267	-161.615	5.94952	13.7352	47.6548	7.7301	-148.189	5.26963	14.5007	74.915	4.31134	-153.4	3.09499	7.10274
RALB	Host|ENSG00000144118.14	RALB	2247	Unknown	50.6777	8.71623	-149.911	6.45967	13.3958	46.9799	8.16032	-149.659	5.34172	17.2763	36.7178	7.21689	-142.616	4.6489	16.123
RALB.1	OtherIntrons|ENSG00000144118.14	RALB.1	36115	Unknown	58.6693	1.67084	-116.225	1.04198	4.21418	94.3045	1.18866	-129.668	0.601573	49.3666	68.0072	1.12448	-115.709	0.568491	51.1289
Pre||snoDB1111	Pre||snoDB1111	Pre||snoDB1111	3260	Unknown	2.81653	2.56128	-63.9058	1.51305	8.33734	62.3287	0.102559	-55.9024	NA	NA	4.99688	1.2778	-64.3465	0.54259	-3.59952
INHBB	Unrelated|ENSG00000163083.6	INHBB	3206	Unknown	163.826	3.70212	-169.572	2.31779	9.19241	108.714	2.41739	-153.472	1.82705	3.57131	165.948	1.55502	-150.393	1.0914	2.70339
NIFK-AS1	Unrelated|ENSG00000236859.8	NIFK-AS1	3238	Unknown	8.80929	3.16012	-86.9049	2.20792	5.55641	8.8935	3.11558	-85.5243	2.00476	6.98706	9.39051	3.07799	-95.234	1.92253	7.71441
TSN	Unrelated|ENSG00000211460.12	TSN	3328	Unknown	62.1834	6.8782	-147.39	5.19143	10.1886	48.1418	6.13	-141.428	4.22715	11.1485	67.0672	5.03384	-152.286	3.48538	9.05809
UGGT1	Unrelated|ENSG00000136731.13	UGGT1	10761	Unknown	58.6272	15.2694	-168.423	10.9511	25.2105	5.12168	7.39929	-97.6145	5.15489	13.1052	55.0289	6.82656	-157.971	4.85804	11.4772
MZT2B	Unrelated|ENSG00000152082.15	MZT2B	769	Unknown	21.9125	34.9777	-149.313	26.8223	50.2592	16.2848	24.668	-146.47	16.288	50.8087	16.3813	20.5478	-151.083	14.6799	34.2306
IMP4	Unrelated|ENSG00000136718.10	IMP4	2411	Unknown	90.4265	8.83962	-164.945	6.49405	13.8376	100.721	6.7892	-157.472	5.12533	10.0527	94.7175	4.6588	-160.549	3.44862	7.17749
PTPN18	Unrelated|ENSG00000072135.13	PTPN18	3616	Unknown	55.9904	8.68004	-136.968	7.32402	10.6523	46.9048	12.5424	-141.448	8.64229	22.8575	59.1853	9.16919	-150.995	6.24578	17.2373
POTEJ	Unrelated|ENSG00000222038.4	POTEJ	3370	Unknown	3.74989	6.2342	-72.9239	4.91947	8.50796	9.72035	4.48037	-102.133	3.15969	7.69799	4.90813	2.39573	-73.1687	1.4963	6.0058
ARHGEF4	Unrelated|ENSG00000136002.20	ARHGEF4	6735	Unknown	9.90346	6.69871	-106.25	4.86326	10.7595	23.5706	6.62881	-124.895	4.74597	10.988	6.55666	4.33161	-97.9765	2.96354	8.04583
PLEKHB2	Unrelated|ENSG00000115762.17	PLEKHB2	4349	Unknown	166.007	5.90066	-162.493	4.65899	8.04466	165.655	5.97307	-167.345	4.21778	10.2307	187.095	4.24366	-166.505	3.07528	6.84378
POTEE	Unrelated|ENSG00000188219.16	POTEE	4451	Unknown	17.9402	7.05201	-113.94	5.54171	9.69395	28.5156	5.30175	-112.525	4.31799	6.86603	17.7489	2.975	-120.139	1.88844	7.0062
SMPD4BP	Unrelated|ENSG00000152117.18	SMPD4BP	3785	Unknown	49.6868	4.45757	-127.067	3.50447	6.12274	38.0356	5.66959	-123.223	4.33005	8.20919	65.685	2.53193	-127.188	1.89088	3.83061
CCDC74A	Unrelated|ENSG00000163040.15	CCDC74A	1543	Unknown	1.59915	24.376	-96.3753	15.8875	52.3412	2.40725	12.0514	-96.3142	7.97989	24.6058	0.806656	10.1775	-76.4826	7.17487	17.5018
ENSG00000286208	Unrelated|ENSG00000286208.1	ENSG00000286208	4030	Unknown	39.0161	4.10272	-137.87	2.57252	10.1257	27.649	2.2071	-116.483	1.51634	4.0538	34.8282	1.90116	-122.011	1.21528	4.36427
POTEKP	Unrelated|ENSG00000204434.6	POTEKP	3569	Unknown	13.7955	12.8524	-133.303	8.88619	23.2133	8.67975	8.82439	-119.746	5.35076	25.1538	13.2259	4.40021	-120.788	2.89952	9.12081
LINC01087	Unrelated|ENSG00000224559.2	LINC01087	3516	Unknown	14.1928	3.4288	-113.843	1.96889	13.2638	12.0776	1.13207	-91.3377	0.50845	-4.99794	14.4952	1.21162	-95.3777	0.633825	13.7055
C2orf27A	Unrelated|ENSG00000287151.1	C2orf27A	3710	Unknown	11.1804	3.52748	-90.8814	2.6143	5.4211	8.73606	4.87564	-97.4599	3.28645	9.44087	15.105	2.41169	-95.7669	1.56119	5.29781
ENSG00000288031	Unrelated|ENSG00000288031.1	ENSG00000288031	2157	Unknown	9.08637	0.987901	-74.9564	0.29441	Inf	74.5311	0.167402	-80.8242	1.91828e-06	-1.91832e-06	6.78753	1.53845	-70.2345	0.806	16.858
MGAT5	Host|ENSG00000152127.9	MGAT5	8252	Unknown	78.6995	7.12478	-153.305	5.40946	10.433	41.1683	5.61655	-131.067	4.04766	9.17141	87.3492	3.44603	-145.032	2.51434	5.47468
Pre||snoDB1130	Pre||snoDB1130	Pre||snoDB1130	24535	Unknown	59.7753	1.57724	-122.018	0.855789	10.0478	118.086	0.902404	-128.959	0.355356	-1.67288	158.142	0.584083	-121.302	0.111783	-0.181103
Post||snoDB1130	Post||snoDB1130	Post||snoDB1130	109359	Unknown	122.932	1.74559	-142.202	0.978794	8.05948	366.254	0.580973	-149.616	0.0831898	-0.116575	253.76	0.722389	-141.999	0.221768	-0.574508
MGAT5.1	OtherIntrons|ENSG00000152127.9	MGAT5.1	192218	Unknown	188.283	1.74996	-149.47	1.03601	5.6294	247.059	1.02828	-149.367	0.461437	-4.50139	358.789	0.821052	-151.634	0.287649	-0.961021
CCNT2	Unrelated|ENSG00000082258.13	CCNT2	6920	Unknown	18446.8	0.00996064	-133.469	NA	NA	161.304	1.33711	-138.789	0.676066	60.1697	254.286	0.698035	-135.266	0.175526	-0.353109
RAB3GAP1	Host|ENSG00000115839.19	RAB3GAP1	4891	Unknown	36.6936	6.29786	-133.342	4.71695	9.47265	25.0902	6.1668	-129.201	3.91741	14.483	43.4544	4.2904	-137.158	2.99651	7.55089
RAB3GAP1.1	OtherIntrons|ENSG00000115839.19	RAB3GAP1.1	66181	Unknown	93.3288	1.25358	-123.566	0.645915	21.1676	163.941	0.810859	-128.452	0.257083	-0.702604	118.375	1.09096	-128.512	0.496984	-5.58994
Post|SNORA40B|snoDB0100	Post|SNORA40B|snoDB0100	Post|SNORA40B|snoDB0100	13613	Unknown	13.1491	2.08223	-88.5815	1.32219	4.89751	180.539	0.146321	-90.7458	NA	NA	19.7841	1.33233	-93.3787	0.732366	7.36952
R3HDM1	Unrelated|ENSG00000048991.17	R3HDM1	4781	Unknown	30.0736	15.5675	-154.429	10.9414	26.9707	8.19912	12.1678	-123.027	7.5338	31.6129	24.1905	8.51027	-146.6	5.80471	15.9398
UBXN4	Unrelated|ENSG00000144224.17	UBXN4	3771	Unknown	53.8869	6.45117	-143.886	4.79417	9.8586	15.5712	6.50794	-114.529	4.26448	13.7322	68.005	4.24513	-147.677	2.97311	7.41951
HNMT	Unrelated|ENSG00000150540.14	HNMT	3132	Unknown	1.47703	13.8692	-80.9941	9.61683	24.8635	2.17879	6.92051	-100.598	4.57642	14.1875	2.14176	4.62104	-82.8694	3.2506	7.98927
SPOPL	Unrelated|ENSG00000144228.9	SPOPL	6056	Unknown	64.5705	5.138	-145.132	3.71596	8.32314	56.2006	4.61826	-143.912	3.1901	8.3616	68.2561	2.96635	-143.983	2.07211	5.21839
KYNU	Unrelated|ENSG00000115919.15	KYNU	15151	Unknown	26.9656	13.1971	-150.764	9.02624	24.5334	17.8624	6.69354	-128.082	4.61171	12.2016	35.4764	5.75754	-141.536	4.14714	9.4126
ACVR2A	Unrelated|ENSG00000121989.15	ACVR2A	5214	Unknown	28.1909	2.2548	-108.546	1.46319	4.9126	23.9829	3.7547	-109.055	2.57286	6.94474	33.4904	1.92529	-107.985	1.21324	4.66057
MBD5	Unrelated|ENSG00000204406.14	MBD5	10732	Unknown	30.8435	4.08402	-122.119	2.93307	6.72162	16.804	9.66388	-113.567	5.81974	28.468	33.5998	3.88046	-127.007	2.42125	9.76639
EPC2	Unrelated|ENSG00000135999.12	EPC2	3883	Unknown	205.011	0.747378	-130.83	0.204693	Inf	110.017	2.36834	-137.386	1.4844	5.85482	146.736	1.4099	-135.209	0.795198	6.2115
KIF5C	Unrelated|ENSG00000168280.18	KIF5C	6954	Unknown	3.23556	11.0638	-90.7004	8.08286	17.528	4.31884	12.855	-97.3695	7.42204	47.967	8.80045	6.66215	-114.105	4.5989	12.0831
LYPD6B	Unrelated|ENSG00000150556.17	LYPD6B	1345	Unknown	9.37949	6.5483	-104.673	4.73896	10.5925	6.17539	5.58075	-95.5552	3.82539	10.3132	8.72966	3.46551	-100.319	2.37061	6.43982
LYPD6	Unrelated|ENSG00000187123.15	LYPD6	4011	Unknown	27.8707	5.61822	-128.222	4.01301	9.3637	14.099	4.54194	-114.055	3.20425	7.79696	28.4747	2.6052	-118.932	1.83811	4.47112
RIF1	Unrelated|ENSG00000080345.18	RIF1	15003	Unknown	157.276	2.99105	-156.253	2.03867	5.61337	137.619	3.19611	-158.132	2.12543	6.44044	208.062	1.91931	-156.311	1.29477	3.70779
FMNL2	Unrelated|ENSG00000157827.20	FMNL2	5630	Unknown	7.83904	6.7956	-106.037	4.63616	12.7207	7.34335	7.49759	-102.008	4.67486	18.9242	6.63727	3.82882	-100.358	2.60168	7.24699
ARL6IP6	Unrelated|ENSG00000177917.12	ARL6IP6	3242	Unknown	32.0144	2.37004	-112.739	1.55467	4.98388	18.7212	2.70897	-107.405	1.79873	5.48429	33.4757	2.32217	-114.295	1.48906	5.27152
KCNJ3	Unrelated|ENSG00000162989.5	KCNJ3	4628	Unknown	14.4216	5.25287	-115.738	3.52034	10.3433	12.9617	2.38877	-102.435	1.59036	4.79707	17.9569	1.99137	-105.816	1.32918	3.96842
GPD2	Unrelated|ENSG00000115159.16	GPD2	6041	Unknown	59.2426	8.86133	-155.051	6.49573	13.9368	50.1847	7.03438	-148.864	4.74916	13.5585	57.2366	5.55295	-150.427	3.77126	10.5257
PKP4	Unrelated|ENSG00000144283.23	PKP4	5777	Unknown	84.4941	7.75625	-153.666	6.08193	10.7026	61.1616	9.75894	-154.906	6.27426	21.9495	64.2359	6.43235	-152.286	4.32325	12.5595
TANC1	Unrelated|ENSG00000115183.15	TANC1	7501	Unknown	82.8712	3.83235	-141.333	2.83966	5.89215	78.3976	3.55297	-140.844	2.59198	5.64644	106.6	1.95943	-139.38	1.34094	3.63693
BAZ2B-AS1	Unrelated|ENSG00000224152.3	BAZ2B-AS1	3053	Unknown	5.9705	3.22207	-79.0124	2.22737	5.82214	4.77831	3.66737	-78.8788	2.60251	6.20707	5.62895	3.22659	-83.9916	2.03482	7.78777
MARCHF7	Unrelated|ENSG00000136536.15	MARCHF7	6043	Unknown	135.347	2.69604	-146.267	1.90706	4.59852	118.875	2.82087	-148.159	1.88482	5.60396	161.362	2.0342	-149.514	1.32606	4.36541
TANK	Unrelated|ENSG00000136560.14	TANK	2155	Unknown	37.6201	2.41717	-109.791	1.7479	3.91695	33.3538	3.16312	-118.156	2.08164	6.58342	51.1494	1.73775	-112.465	1.09866	4.15439
LINC01806	Unrelated|ENSG00000227403.3	LINC01806	2468	Unknown	0.799505	10.2121	-60.2428	7.03133	18.6482	0.901953	6.4755	-56.1514	3.44065	54.9044	0.97122	10.4199	-67.7896	6.17454	33.3499
PSMD14	Unrelated|ENSG00000115233.12	PSMD14	1567	Unknown	46.3868	9.7554	-151.502	7.14636	15.3649	33.2836	8.48868	-138.042	5.57537	17.7785	44.3804	6.36919	-147.7	4.36944	11.744
SLC4A10	Unrelated|ENSG00000144290.17	SLC4A10	5710	Unknown	1.00971	23.4319	-93.5308	13.2608	100.569	0.167125	7.74343	-61.651	4.21796	47.1652	0.777756	4.7632	-71.789	3.65021	6.85267
GCA	Unrelated|ENSG00000115271.11	GCA	3651	Unknown	14.4436	7.99297	-118.812	5.8526	12.6015	14.2842	7.31296	-113.604	4.89024	14.4931	14.3137	6.81058	-118.063	4.46698	14.3275
CERS6	Unrelated|ENSG00000172292.15	CERS6	6851	Unknown	92.9083	6.67117	-155.173	5.09173	9.67113	26.4691	12.553	-131.7	7.31347	44.2666	60.438	6.14204	-150.47	3.87618	14.7844
ENSG00000251569	Unrelated|ENSG00000251569.1	ENSG00000251569	1935	Unknown	3.00826	4.20952	-74.7734	2.73165	9.17144	2.9746	8.52945	-79.5649	4.77086	40.1994	3.14709	3.28736	-68.2476	2.22645	6.27961
BBS5	Unrelated|ENSG00000163093.12	BBS5	3159	Unknown	10.0268	3.89297	-97.3951	2.67583	7.14126	8.61183	8.61322	-98.0001	5.43946	20.6785	9.99608	3.85641	-94.2409	2.55546	7.85559
PPIG	Unrelated|ENSG00000138398.17	PPIG	6479	Unknown	55.9773	2.64828	-124.693	1.86794	4.54835	48.9689	2.73142	-131.246	1.7245	6.56423	80.7141	1.70102	-128.884	1.09803	3.77292
PHOSPHO2	Unrelated|ENSG00000144362.12	PHOSPHO2	1253	Unknown	4.01643	4.23658	-83.1414	2.69805	9.85798	1.70171	6.03336	-64.6036	3.22324	47.074	4.96034	4.18113	-89.7947	2.3136	21.6861
KLHL23	Host|ENSG00000213160.10	KLHL23	2087	Unknown	5.05039	5.07452	-93.8892	3.19975	12.2547	3.67759	4.92483	-87.9807	2.75708	23.04	6.34489	2.03694	-86.1949	1.4351	3.50815
KLHL23.1	OtherIntrons|ENSG00000213160.10	KLHL23.1	15746	Unknown	10.2605	2.23902	-91.6159	1.28501	8.69231	12.3988	1.56814	-83.4705	0.839902	11.7946	19.2723	0.945722	-86.6732	0.402187	-2.69095
Pre|SNORA51|snoDB0128	Pre|SNORA51|snoDB0128	Pre|SNORA51|snoDB0128	30340	Unknown	44.5737	2.00662	-124.508	1.11063	10.3833	61.6748	1.20407	-115.806	0.507141	-3.21749	65.0983	1.63975	-124.597	0.879917	12.0155
SSB	Unrelated|ENSG00000138385.16	SSB	1782	Unknown	45.9552	8.03472	-144.581	6.02055	12.0741	51.0595	8.1259	-150.167	5.33357	17.0547	43.7888	6.79833	-146.532	4.53361	13.5841
UBR3	Unrelated|ENSG00000144357.18	UBR3	8009	Unknown	73.2067	4.88632	-142.993	3.68712	7.24156	28.4059	7.57281	-131.387	4.68657	19.7134	72.8158	3.91959	-146.579	2.63186	7.67473
GAD1	Unrelated|ENSG00000128683.14	GAD1	3700	Unknown	0.723663	10.6964	-58.1799	7.43376	19.0634	4.02566	7.74438	-86.3767	5.2586	14.6871	0.789132	8.22233	-65.545	4.4594	52.6461
GORASP2	Unrelated|ENSG00000115806.13	GORASP2	2447	Unknown	168.863	4.77982	-161.856	3.63034	6.99449	142.131	5.38439	-163.057	3.85162	8.9435	204.113	3.15404	-161.315	2.29546	5.03868
DCAF17	Unrelated|ENSG00000115827.14	DCAF17	5853	Unknown	11.8274	6.02842	-105.823	4.48132	9.20694	15.6857	4.80947	-114.199	3.16069	10.0543	16.7636	3.83269	-113.097	2.60429	7.25453
DYNC1I2	Unrelated|ENSG00000077380.16	DYNC1I2	4354	Unknown	35.7255	8.28166	-139.338	6.20067	12.465	4.88183	11.8137	-95.8428	6.79421	45.227	31.5688	7.43885	-138.608	5.03253	14.2549
HAT1	Unrelated|ENSG00000128708.13	HAT1	1634	Unknown	23.5055	8.5037	-129.479	6.39638	12.6817	22.844	7.6298	-130.567	5.14754	14.7357	23.9627	6.50796	-132.261	4.43914	12.1881
METAP1D	Unrelated|ENSG00000172878.14	METAP1D	3049	Unknown	2.82305	10.7089	-93.2804	7.21056	20.801	1.33981	6.71959	-76.0906	4.28778	15.524	3.52794	5.22372	-89.5424	3.51364	10.1767
DLX1	Unrelated|ENSG00000144355.15	DLX1	2356	Unknown	14.0605	2.58453	-99.3538	1.61569	6.45557	20.0117	1.82786	-100.776	1.20285	3.80495	14.3485	1.80388	-98.8924	1.23422	3.35023
ITGA6	Unrelated|ENSG00000091409.16	ITGA6	5816	Unknown	9.70666	9.2554	-111.051	6.90468	14.033	11.291	7.06404	-116.144	4.66151	14.5769	8.52046	6.91233	-111.555	4.62131	13.7081
PDK1	Unrelated|ENSG00000152256.14	PDK1	14072	Unknown	13.7987	5.65462	-106.663	4.26148	8.40106	16.1928	4.42576	-113.43	2.71172	12.0293	11.0529	5.4301	-113.342	3.48378	12.3043
MAP3K20	Unrelated|ENSG00000091436.17	MAP3K20	7179	Unknown	47.5843	6.62599	-139.312	5.03919	9.67147	41.5349	6.18767	-141.061	4.33257	10.8209	29.1899	5.4933	-133.379	3.70407	10.6262
CDCA7	Unrelated|ENSG00000144354.15	CDCA7	2778	Unknown	41.3929	3.31777	-140.291	1.8456	16.3971	11.7933	2.83083	-109.173	1.97283	5.0095	31.935	2.54798	-130.902	1.76368	4.58843
SCRN3	Unrelated|ENSG00000144306.15	SCRN3	3052	Unknown	9.81592	5.43907	-103.542	3.83096	9.37395	4.69067	6.57447	-87.893	3.78903	24.8217	9.37642	5.30483	-103.941	3.36701	12.4975
ENSG00000290018	Unrelated|ENSG00000290018.1	ENSG00000290018	487	Unknown	4.76701	17.0173	-119.31	10.7797	40.3879	3.76796	12.3793	-105.931	7.56183	34.1098	4.04355	10.7567	-110.779	6.80821	25.6087
MTX2	Unrelated|ENSG00000128654.14	MTX2	1341	Unknown	16.3919	5.57149	-107.465	4.32275	7.83476	7.22622	8.51647	-99.8827	5.34957	20.8733	13.752	3.96791	-111.493	2.67624	7.66961
HNRNPA3	Host|ENSG00000170144.22	HNRNPA3	5710	Unknown	77.476	14.4703	-176.154	10.1228	25.3632	58.084	10.0548	-162.589	6.52478	21.9071	75.7065	8.05234	-172.628	5.64241	14.0557
HNRNPA3.1	OtherIntrons|ENSG00000170144.22	HNRNPA3.1	5504	Unknown	21499	0.00255509	-110.523	NA	NA	45.7245	0.958543	-104.981	0.399612	-2.40425	336.386	0.139432	-111.485	NA	NA
RBM45	Unrelated|ENSG00000155636.15	RBM45	1803	Unknown	7.42793	7.59031	-105.731	5.29222	13.4161	5.97204	6.97936	-97.9239	4.46943	15.9192	7.9621	6.94206	-101.979	4.57342	14.4
PLEKHA3	Unrelated|ENSG00000116095.11	PLEKHA3	13892	Unknown	26.8717	4.94988	-120.813	3.67482	7.57991	24.3506	6.18791	-122.953	4.12303	12.3961	31.1244	4.71924	-128.54	3.07658	10.1254
TTN-AS1	Unrelated|ENSG00000237298.11	TTN-AS1	6297	Unknown	15.4212	3.57861	-100.493	2.60934	5.69354	7.26607	6.98759	-90.5723	4.53179	15.2536	12.0432	5.06395	-106.202	3.1344	13.1738
UBE2E3	Unrelated|ENSG00000170035.16	UBE2E3	1556	Unknown	28.2323	8.41162	-132.736	6.38401	12.3266	13.9642	11.6088	-122.197	6.53315	52.0344	25.1813	7.55973	-134.472	5.02352	15.2681
ITPRID2	Unrelated|ENSG00000138434.17	ITPRID2	5308	Unknown	58.703	4.11483	-134.526	3.0644	6.26099	44.4033	8.63731	-142.01	5.29422	23.4365	58.7815	4.2934	-140.452	2.82167	8.9741
DNAJC10	Unrelated|ENSG00000077232.19	DNAJC10	20144	Unknown	23.19	14.6481	-146.416	10.3772	24.8936	19.6323	8.92661	-136.239	5.6526	21.2137	17.8048	7.72578	-135.183	5.4219	13.4343
DUSP19	Unrelated|ENSG00000162999.13	DUSP19	5191	Unknown	3.18489	4.09975	-73.8286	2.72248	8.29721	4.65936	2.86355	-81.2066	1.77812	7.35066	3.02116	4.71218	-75.9491	2.61265	23.9931
NUP35	Unrelated|ENSG00000163002.13	NUP35	1545	Unknown	19.57	4.38091	-112.577	3.16391	7.11941	11.9341	3.74825	-98.575	2.52184	7.29676	24.1367	2.73051	-115.708	1.86126	5.12309
ZNF804A	Unrelated|ENSG00000170396.9	ZNF804A	4527	Unknown	8.90369	2.98307	-96.3018	1.77433	9.35823	2.854	6.23219	-73.7236	3.46832	30.6838	9.46154	1.82501	-77.6186	1.16068	4.26771
ZC3H15	Unrelated|ENSG00000065548.18	ZC3H15	2032	Unknown	34.9268	6.96351	-137.886	5.02955	11.314	43.3574	6.15604	-147.398	4.02448	13.0881	38.1489	4.61793	-139.05	3.18627	8.3859
ITGAV	Unrelated|ENSG00000138448.13	ITGAV	7039	Unknown	41.2307	9.67704	-145.991	7.28107	14.4233	68.0562	6.89402	-156.786	4.69854	12.9408	44.2657	6.11758	-143.149	4.33948	10.3644
FAM171B	Unrelated|ENSG00000144369.14	FAM171B	5731	Unknown	31.6559	5.5056	-138.159	3.56604	12.0709	22.4501	8.19446	-125.91	4.83948	26.714	19.149	8.63041	-126.545	4.74095	48.0523
GULP1	Unrelated|ENSG00000144366.17	GULP1	3544	Unknown	13.8187	7.08399	-120.343	4.85234	13.1164	15.3232	6.61712	-123.067	4.17413	15.9553	7.9172	4.23848	-102.214	2.84928	8.27122
COL3A1	Unrelated|ENSG00000168542.16	COL3A1	5490	Unknown	1.91039	57.3019	-114.953	33.1106	212.718	0.39406	21.0933	-102.68	12.4922	67.7187	0.283859	16.0804	-97.4821	10.7797	31.6375
WDR75	Unrelated|ENSG00000115368.10	WDR75	2647	Unknown	45.4049	3.67026	-129.816	2.59315	6.27784	49.2161	3.92274	-138.436	2.72323	7.01082	56.6482	2.74355	-137.733	1.88708	5.02355
ASNSD1	Unrelated|ENSG00000138381.10	ASNSD1	2411	Unknown	63.6836	3.08976	-130.95	2.23085	5.02411	67.0682	3.19102	-135.556	2.18507	5.91344	66.4128	3.02641	-137.15	2.05686	5.72504
ASDURF	Unrelated|ENSG00000286053.2	ASDURF	643	Unknown	15.8244	3.14717	-101.706	2.17468	5.69303	17.188	3.73299	-108.261	2.45057	7.83117	18.4793	2.98793	-107.285	1.99142	5.98069
ENSG00000286165	Unrelated|ENSG00000286165.1	ENSG00000286165	741	Unknown	13.5762	3.00779	-92.3788	2.18712	4.81421	13.4133	3.38835	-99.3378	2.23874	6.96489	15.1114	2.90987	-98.2272	1.98076	5.48063
ANKAR	Unrelated|ENSG00000151687.15	ANKAR	4521	Unknown	1.51257	4.97286	-70.5542	2.83277	20.337	1.78903	7.88268	-70.7403	4.34553	42.3737	2.01327	3.66789	-66.0242	2.11213	13.9243
PMS1	Unrelated|ENSG00000064933.19	PMS1	3417	Unknown	9.32046	5.74155	-104.408	4.00422	10.1418	5.64885	6.79387	-100.473	4.27802	16.4935	11.487	3.69624	-111.359	2.41119	7.91411
INPP1	Unrelated|ENSG00000151689.13	INPP1	2044	Unknown	1.57742	6.08521	-72.3813	3.71835	16.7421	4.50062	4.58687	-84.5959	3.10066	8.8094	2.44378	3.35657	-71.3642	2.23462	6.74109
MFSD6	Unrelated|ENSG00000151690.15	MFSD6	4796	Unknown	19.9676	5.04552	-129.776	3.03025	15.0634	16.0787	13.4537	-121.07	6.97711	187.541	10.079	15.9909	-119.723	6.51526	-35.1932
NAB1	Unrelated|ENSG00000138386.17	NAB1	4508	Unknown	10.5438	3.05339	-92.9696	2.05575	5.93231	36.4185	1.5269	-104.763	0.746508	-33.6424	22.3867	1.76131	-103.354	0.973504	9.23345
GLS	Unrelated|ENSG00000115419.13	GLS	4840	Unknown	34.877	5.01571	-128.552	3.67722	7.88627	28.7894	4.1018	-118.198	2.83385	7.42315	43.8195	3.57867	-130.232	2.53393	6.08925
MYO1B	Host|ENSG00000128641.19	MYO1B	5069	Unknown	68.2002	7.27387	-153.635	5.33551	11.4243	124.845	6.75843	-177.224	4.59265	12.7898	82.3695	4.4998	-158.092	3.25841	7.26923
Pre||snoDB1162	Pre||snoDB1162	Pre||snoDB1162	4682	Unknown	9.39557	1.7316	-84.5128	0.892563	28.876	23.2311	0.801191	-89.7158	0.281609	-0.948102	16.2614	0.88503	-83.8595	0.366002	-2.11676
Post||snoDB1162	Post||snoDB1162	Post||snoDB1162	26531	Unknown	30.7316	1.72205	-107.86	0.973973	7.42494	91.1669	0.79104	-123.152	0.289045	-1.07371	62.6693	0.81299	-111.818	0.349788	-2.50741
MYO1B.1	OtherIntrons|ENSG00000128641.19	MYO1B.1	143828	Unknown	118.359	2.25644	-146.451	1.38914	6.00677	446.556	0.897871	-166.308	0.351115	-1.61139	325.015	0.822593	-155.428	0.310627	-1.2691
NABP1	Unrelated|ENSG00000173559.15	NABP1	11524	Unknown	44.2722	1.38139	-114.602	0.658286	Inf	142.058	1.11327	-137.33	0.479353	-3.45272	44.2843	1.16894	-115.415	0.627498	8.52331
SLC39A10	Unrelated|ENSG00000196950.14	SLC39A10	5432	Unknown	6.41105	10.3742	-107.968	7.37888	17.4628	7.50482	8.45027	-108.744	5.1918	22.6925	4.99598	7.75599	-107.485	4.82412	19.7731
CCDC150	Unrelated|ENSG00000144395.18	CCDC150	3597	Unknown	3.97861	3.89731	-76.5895	2.63121	7.51193	5.90856	2.38294	-82.3544	1.32166	12.0951	6.51071	1.62797	-78.118	0.808613	-122.495
COQ10B	Unrelated|ENSG00000115520.9	COQ10B	2112	Unknown	69.4328	2.32183	-124.371	1.65208	3.90483	93.0302	3.07152	-140.659	2.08359	5.84107	94.0348	1.62346	-128.267	1.00669	4.19144
HSPE1	Unrelated|ENSG00000115541.11	HSPE1	570	Unknown	30.6807	11.9553	-147.776	8.596	19.6245	48.6367	11.95	-158.64	7.43135	30.4883	32.1441	8.65598	-149.161	6.07471	15.0518
HSPE1-MOB4	Unrelated|ENSG00000270757.1	HSPE1-MOB4	890	Unknown	28.7754	5.7404	-127.225	4.20945	9.02142	31.6566	8.21937	-136.39	5.35552	17.6665	33.4825	4.54321	-127.007	3.3117	7.23287
MOB4	Unrelated|ENSG00000115540.15	MOB4	3785	Unknown	45.6305	4.07067	-130.283	2.96243	6.5037	47.2456	3.83062	-130.453	2.69142	6.64199	58.5115	2.57406	-132.023	1.68951	5.40263
C2orf69	Unrelated|ENSG00000178074.6	C2orf69	3691	Unknown	67.5659	2.65852	-128.73	1.88914	4.48514	36.4006	5.19969	-133.126	3.57183	9.55385	82.0006	2.2134	-136.443	1.44008	4.78047
MAIP1	Unrelated|ENSG00000162972.11	MAIP1	1495	Unknown	15.0629	8.21449	-118.556	6.14114	12.4014	20.3951	5.93022	-122.686	4.06075	10.9896	19.2824	4.24711	-116.74	3.20155	6.30677
SPATS2L	Unrelated|ENSG00000196141.14	SPATS2L	6212	Unknown	43.771	9.86277	-145.879	7.56991	14.1481	77.7981	7.23904	-161.141	5.11279	12.3928	29.3244	6.19619	-136.641	4.3635	10.6831
SGO2	Unrelated|ENSG00000163535.18	SGO2	4478	Unknown	79.3445	2.23378	-135.102	1.40498	5.44696	48.2914	3.06124	-130.535	1.93873	7.27127	92.9775	1.7816	-132.711	1.02783	6.68186
AOX1	Unrelated|ENSG00000138356.14	AOX1	4928	Unknown	1.06526	24.1579	-86.8827	15.6614	52.8061	2.50108	9.70956	-107.538	6.36658	20.4448	1.48801	8.0774	-99.6333	5.80421	13.2775
BZW1	Unrelated|ENSG00000082153.18	BZW1	6511	Unknown	164.443	11.4653	-185.827	8.37063	18.1902	180.882	8.5589	-184.245	5.73639	16.8494	148.84	7.82056	-182.008	5.36809	14.3988
NIF3L1	Unrelated|ENSG00000196290.17	NIF3L1	1821	Unknown	42.6792	4.22784	-124.401	3.25193	6.04066	30.3202	4.31334	-122.506	3.10197	7.077	46.897	3.10097	-127.564	2.19834	5.26123
NDUFB3	Unrelated|ENSG00000119013.10	NDUFB3	1548	Unknown	13.8053	13.266	-124.484	10.1999	18.9678	12.2579	14.1913	-125.808	8.67578	38.9595	12.7173	11.8639	-131.386	7.23417	32.953
CFLAR	Unrelated|ENSG00000003402.21	CFLAR	14612	Unknown	73.7269	2.91574	-126.782	2.23913	4.17833	98.6206	3.80393	-144.162	2.62341	6.91615	76.7343	2.92408	-135.319	1.97757	5.60838
CASP8	Unrelated|ENSG00000064012.24	CASP8	2930	Unknown	20.9144	3.50624	-107.712	2.54211	5.64852	39.6134	3.82021	-126.869	2.72669	6.3781	31.0673	2.83294	-115.866	1.91892	5.40965
STRADB	Unrelated|ENSG00000082146.13	STRADB	2222	Unknown	8.35927	8.1585	-109.907	5.7167	14.2415	7.23306	8.05992	-100.623	4.99692	20.8254	10.5728	5.25057	-109.263	3.64786	9.36527
NOP58	Host|ENSG00000055044.11	NOP58	1994	Unknown	29.196	7.66928	-137.324	5.44766	12.9508	43.7083	5.4861	-145.421	3.78102	9.99212	31.886	4.27194	-136.154	3.07755	6.9814
NOP58.1	OtherIntrons|ENSG00000055044.11	NOP58.1	24521	Unknown	5463.64	0.0255951	-132.751	NA	NA	200.251	0.873508	-138.604	0.331693	-1.3789	178.949	0.710761	-135.958	0.209156	-0.508327
Pre|SNORD70|snoDB0107	Pre|SNORD70|snoDB0107	Pre|SNORD70|snoDB0107	1241	Unknown	4.23203	1.31234	-64.8372	0.501429	Inf	7.54575	1.207	-69.7384	0.639562	10.7034	11.4419	0.697496	-76.1204	0.165475	-0.314879
Post|SNORD70|snoDB0107	Post|SNORD70|snoDB0107	Post|SNORD70|snoDB0107	1431	Unknown	8.31332	1.45679	-81.5259	0.628438	Inf	12.8533	1.13011	-74.1652	0.58819	14.3652	8.58594	1.35431	-69.8982	0.888354	2.84826
Post|SNORD70B|snoDB0111	Post|SNORD70B|snoDB0111	Post|SNORD70B|snoDB0111	4158	Unknown	806.661	0.0441097	-104.539	NA	NA	34.563	1.13318	-110.055	0.567599	318.747	258.4	0.129056	-103.036	NA	NA
Post|SNORD11B|snoDB0108	Post|SNORD11B|snoDB0108	Post|SNORD11B|snoDB0108	1355	Unknown	7.98369	1.11723	-74.0568	0.391825	Inf	7.19191	1.98972	-72.7242	1.35058	3.77726	5.23872	1.39534	-69.1261	0.851995	3.85172
Post|SNORD11|snoDB0109	Post|SNORD11|snoDB0109	Post|SNORD11|snoDB0109	2539	Unknown	151.708	0.108132	-82.1939	NA	NA	142.189	0.116996	-83.2033	NA	NA	14.44	0.794471	-76.8801	0.300003	-1.22564
BMPR2	Unrelated|ENSG00000204217.16	BMPR2	12068	Unknown	120.188	5.24141	-156.839	3.94659	7.80071	108.777	5.95702	-156.876	4.05075	11.2523	139.834	3.61738	-157.568	2.46048	6.82775
FAM117B	Unrelated|ENSG00000138439.12	FAM117B	5982	Unknown	45.4756	2.90468	-124.472	2.00696	5.25544	29.8514	4.63704	-116.858	3.22147	8.27183	46.962	3.01211	-127.161	1.90448	7.19891
CARF	Unrelated|ENSG00000138380.18	CARF	7974	Unknown	3.8895	4.82575	-91.2698	2.80782	17.1542	4.0525	4.44125	-77.9702	2.922	9.25135	4.1694	6.34269	-85.4196	3.71529	21.6611
NBEAL1	Unrelated|ENSG00000144426.19	NBEAL1	16349	Unknown	43.841	4.76256	-136.927	3.32287	8.40358	34.0569	4.24653	-127.85	2.78641	8.9216	49.4766	3.13314	-136.075	2.03502	6.80549
CYP20A1	Unrelated|ENSG00000119004.17	CYP20A1	10552	Unknown	38.6746	3.46955	-124.509	2.44621	5.96488	27.4612	6.29886	-119.522	4.27898	11.9307	54.4171	3.72121	-133.521	2.51848	7.12277
ABI2	Unrelated|ENSG00000138443.17	ABI2	22039	Unknown	50.8999	7.63543	-141.846	5.94803	10.6594	42.4907	6.42326	-136.832	4.41258	11.8003	56.1935	5.58751	-146.084	3.82508	10.3618
PARD3B	Unrelated|ENSG00000116117.19	PARD3B	8492	Unknown	6.47878	5.28101	-101.539	3.29431	13.3045	1.31901	14.7924	-70.288	6.60662	-61.8851	3.38992	6.58233	-85.3118	3.20786	-126.731
NRP2	Unrelated|ENSG00000118257.17	NRP2	6662	Unknown	0.473806	8.03589	-54.7415	4.54434	34.6868	1.82316	3.52182	-61.3793	2.49637	5.97707	0.988413	4.34938	-58.7939	2.428	20.8445
INO80D-AS1	Unrelated|ENSG00000227946.3	INO80D-AS1	752	Unknown	3.62863	2.07072	-73.5969	0.974057	Inf	4.71368	2.74588	-74.531	1.59535	9.84792	6.55052	2.01919	-68.4534	1.28532	4.70638
EEF1B2	Host|ENSG00000114942.14	EEF1B2	880	Unknown	65.9754	33.0338	-183.377	23.1641	57.5581	52.7212	22.174	-178.62	13.7208	57.7575	48.4179	16.792	-181.025	11.6388	30.1342
EEF1B2.1	OtherIntrons|ENSG00000114942.14	EEF1B2.1	1551	Unknown	3.43656	7.05229	-80.7375	5.19819	10.9624	5.11911	3.30868	-86.4413	1.9648	10.4697	4.86763	2.84898	-83.2662	1.90866	5.61552
FASTKD2	Unrelated|ENSG00000118246.14	FASTKD2	6712	Unknown	45.8725	3.89425	-132.772	2.71569	6.88005	43.0188	3.43084	-130.339	2.38209	6.12943	42.4426	2.67412	-126.84	1.88314	4.6108
CREB1	Unrelated|ENSG00000118260.15	CREB1	10095	Unknown	74.8488	3.29242	-133.625	2.46191	4.96853	44.6956	3.87332	-129.187	2.69841	6.86042	87.9272	2.32802	-138.065	1.55263	4.65056
CCNYL1	Unrelated|ENSG00000163249.13	CCNYL1	3813	Unknown	21.3951	8.24154	-128.596	6.0603	12.8759	34.3286	4.63712	-131.398	3.06833	9.48841	22.6014	5.05615	-124.572	3.41341	9.74707
PIKFYVE	Unrelated|ENSG00000115020.17	PIKFYVE	9908	Unknown	65.8994	3.62724	-138.059	2.57399	6.13943	59.157	5.21494	-143.07	3.17388	14.611	78.6649	2.88185	-141.151	1.8182	6.94417
MAP2	Unrelated|ENSG00000078018.21	MAP2	9711	Unknown	8.5401	5.44677	-97.8363	3.94742	8.78272	5.06287	8.37714	-90.4166	4.75775	35.012	7.77077	3.89999	-90.3175	2.31397	12.397
RPE	Unrelated|ENSG00000197713.15	RPE	3180	Unknown	27.7212	10.7072	-143.011	7.6896	17.6229	24.7319	6.5716	-136.521	4.55022	11.8245	28.5158	6.25514	-140.258	4.27023	11.688
SNHG31.1	OtherIntrons|ENSG00000229267.3	SNHG31.1	32187	Unknown	7.41893	0.972182	-68.0296	0.298402	Inf	4.02847	1.06934	-57.6272	0.496677	-6.98962	2.65695	1.86808	-57.4256	1.17724	4.52141
Post|SNORA70I|snoDB0113	Post|SNORA70I|snoDB0113	Post|SNORA70I|snoDB0113	114728	Unknown	14.665	24.9184	-140.856	18.219	39.4101	11.7574	26.9219	-140.091	14.0146	340.732	14.3245	17.8987	-144.749	11.4431	41.0669
ATIC	Unrelated|ENSG00000138363.15	ATIC	2275	Unknown	76.7885	14.9292	-177.287	10.3443	26.8136	58.7182	7.08032	-163.549	5.09045	11.6243	72.5697	6.28837	-167.751	4.65051	9.70712
TMEM169	Unrelated|ENSG00000163449.11	TMEM169	3460	Unknown	2.72425	3.40663	-68.8788	2.13148	8.47947	6.28433	1.40535	-67.9182	0.734369	16.2826	4.06984	2.23456	-71.2524	1.29598	8.10267
XRCC5	Unrelated|ENSG00000079246.16	XRCC5	3761	Unknown	153.413	12.1635	-186.106	8.8133	19.6229	127.037	9.29906	-175.54	6.23085	18.3204	141.928	7.55525	-181.069	5.29078	13.2086
SMARCAL1	Unrelated|ENSG00000138375.14	SMARCAL1	3244	Unknown	22.3153	6.47486	-121.005	4.90333	9.52892	20.3129	5.18639	-118.818	3.76541	8.32987	25.6157	3.78798	-124.639	2.56502	7.23979
RPL37A	Unrelated|ENSG00000197756.10	RPL37A	2992	Unknown	109.313	34.2336	-191.458	25.2551	53.1177	111.453	27.6628	-191.192	16.867	76.8515	98.8917	21.81	-194.598	14.3831	45.0961
IGFBP2	Unrelated|ENSG00000115457.10	IGFBP2	1414	Unknown	24.5026	49.4875	-159.921	35.7835	80.2027	11.3521	22.3661	-155.204	15.5313	39.944	13.3668	20.3622	-158.418	14.1151	36.5297
ARPC2	Unrelated|ENSG00000163466.16	ARPC2	1605	Unknown	68.1339	15.1479	-171.637	10.8952	24.8456	92.84	9.80626	-175.17	6.48625	20.0887	68.2656	8.6833	-166.956	6.06592	15.2737
PNKD	Host|ENSG00000127838.15	PNKD	3100	Unknown	63.9083	9.19198	-147.653	7.41745	12.0826	49.0206	6.65293	-148.594	4.98482	9.99895	55.8554	6.35601	-149.398	4.72153	9.72128
PNKD.1	OtherIntrons|ENSG00000127838.15	PNKD.1	6075	Unknown	11.1337	1.92421	-80.323	1.24083	4.28319	8.19409	1.78738	-92.4547	1.07547	5.28743	12.6299	1.15867	-81.3906	0.62402	8.08985
Pre|snoU13|snoDB1934	Pre|snoU13|snoDB1934	Pre|snoU13|snoDB1934	5148	Unknown	852.585	0.0216799	-82.8629	NA	NA	8.01451	1.38014	-88.5625	0.859106	3.50714	26.1737	0.441568	-80.5676	0.0252949	-0.0285679
Post|snoU13|snoDB1934	Post|snoU13|snoDB1934	Post|snoU13|snoDB1934	11102	Unknown	19.8588	1.19507	-90.8976	0.526653	Inf	23758.7	0.000696945	-93.4097	NA	NA	30.4183	0.55577	-88.1245	0.0916709	-0.136799
CTDSP1	Unrelated|ENSG00000144579.8	CTDSP1	2525	Unknown	158.046	4.3507	-144.407	3.68464	5.31069	113.811	4.76797	-150.903	3.52173	7.37928	177.356	3.73026	-160.439	2.6772	6.14888
CNOT9	Unrelated|ENSG00000144580.14	CNOT9	3820	Unknown	142.786	3.83012	-154.545	2.83279	5.91129	90.8149	3.96055	-145.213	2.91483	6.17636	163.74	2.66923	-156.533	1.88175	4.5901
BCS1L	Unrelated|ENSG00000074582.15	BCS1L	2015	Unknown	21.0674	12.4703	-130.103	9.87705	16.9101	18.437	7.97581	-125.116	5.85467	12.5072	20.8411	6.52844	-128.991	4.88201	9.85043
STK36	Unrelated|ENSG00000163482.12	STK36	4873	Unknown	14.6005	9.75964	-115.607	7.74676	13.1858	20.7836	7.56152	-132.514	5.52534	11.9742	18.1314	6.94748	-123.11	4.96338	11.5742
TTLL4	Unrelated|ENSG00000135912.11	TTLL4	5007	Unknown	98.3239	3.50229	-143.4	2.58012	5.4503	90.4986	3.07718	-138.599	2.29676	4.66092	132.187	2.09176	-141.911	1.54372	3.24309
RETREG2	Unrelated|ENSG00000144567.11	RETREG2	4556	Unknown	124.595	5.94175	-149.885	4.91653	7.50721	122.856	7.94773	-160.426	5.6033	13.6653	118.447	5.72369	-158.885	3.95673	10.3422
[truncated: 13,416 more rows]
